# Supplementary material for: N501Y mutation of spike protein in SARS-CoV-2 strengthens its binding to receptor ACE2
Source: eLife. 2021 Aug 20;10:e69091. doi: 10.7554/eLife.69091 (PMC8455130; doi:10.7554/eLife.69091)
Supplement: Figure 1—source data 1. [file elife-69091-fig1-data1.xlsx]

## Sheet: Sheet1
	nM	Total binding			NS binding			Specific binding
	370.37	453	486	448	59	63	51.9	394	423	396.1
	123.457	409	419		51	57.1		358	361.9
	41.1523	282	270	260	50	50	51	232	220	209
	13.7174	163	150	144	48	48	48	115	102	96
	4.57247	91.1	92.9	91.1	48	48	48	43.1	44.9	43.1
	1.52416	63	63	61.1	47.1	46	47.1	15.9	17	14
	0.508053	58.1	57.1	58.1	47.1	45	47.1	11	12.1	11
	0	50	73.1	50	46	55	47.1	4	18.1	2.9
	Log(M)	RBD-WT			RBD-N501Y			RBD-K417N			RBD-E484K			RBD-N501Y-K417N-E484K
	-5.30103	102	120	92	79	93.9	74.1	148	186	143	98.1	129	95.2	101	136	102
	-5.77815	128	159	126	85.1	113	84	210	232	206	126	157	121	146	167	133
	-6.25527	188	228	182	113	122	132	357	394	320	197	210	186	200	220	212
	-6.73239	377	400	342	174	187	169	547	551	473	312	346	302	319	367	324
	-7.20952	540	557	503	295	341	300	614	631	557	517	512	486	522	547	480
	-7.68664	687	730	630	529	524	454	638	664	574	582	610	551	600	616	549
	-8.16376	715	740	653	606	662	572	629	635	578	614	699	582	675	678	600
	-8.64088	800	830	742	701	745	644	653	689	598	621	606	564	776	737	675
	-9.118	750	868	682	685	725	627	689	710	572	610	680	590	699	755	660
	-9.59512	737	797	699	668	692	594	673	610	723	653	680	572	692	758	655
