# Supplementary material for: N501Y mutation of spike protein in SARS-CoV-2 strengthens its binding to receptor ACE2
Source: eLife. 2021 Aug 20;10:e69091. doi: 10.7554/eLife.69091 (PMC8455130; doi:10.7554/eLife.69091)
Supplement: Figure 2—source data 1. [file elife-69091-fig2-data1.xlsx]

## Sheet: WT
Times	50 nM	50 nM-Fit	20 nM	20 nM-Fit	10 nM	10 nM-Fit	5 nM	5 nM-Fit	2 nM	2 nM-Fit	1 nM	1 nM-Fit
-60.74	-0.0140076	0	-0.0690613	0	-0.0470428	0	-0.0954285	0	-0.0949097	0	-0.13295	0
-59.74	0.0242767	0	-0.0707855	0	-0.0681305	0	-0.0893402	0	-0.078186	0	-0.112167	0
-58.74	0.0200653	0	-0.0620422	0	-0.0595398	0	-0.0848083	0	-0.0735016	0	-0.0790405	0
-57.74	0.0219269	0	-0.0531311	0	-0.0684357	0	-0.090744	0	-0.0844421	0	-0.0341949	0
-56.74	0.0406799	0	-0.0500031	0	-0.0595398	0	-0.0877838	0	-0.09021	0	-0.020752	0
-55.74	0.0364685	0	-0.0457916	0	-0.0637512	0	-0.0837097	0	-0.0961609	0	-0.0355988	0
-54.74	0.00521851	0	-0.0307922	0	-0.07547	0	-0.090744	0	-0.112869	0	-0.0668488	0
-53.74	-0.00650024	0	-0.0299988	0	-0.0637512	0	-0.0996552	0	-0.124588	0	-0.101227	0
-52.74	-0.0018158	0	-0.03125	0	-0.0796967	0	-0.0799713	0	-0.133499	0	-0.110138	0
-51.74	-0.0018158	0	-0.0273438	0	-0.0973511	0	-0.0566864	0	-0.139435	0	-0.139511	0
-50.74	0.00880432	0	-0.0334473	0	-0.107971	0	-0.0469971	0	-0.137558	0	-0.144196	0
-49.74	0.0117798	0	-0.0373535	0	-0.129379	0	-0.0334015	0	-0.112869	0	-0.132477	0
-48.74	0.0205231	0	-0.0432892	0	-0.129379	0	-0.0413666	0	-0.0914612	0	-0.132477	0
-47.74	0.0223999	0	-0.0432892	0	-0.123444	0	-0.0469971	0	-0.0769348	0	-0.112946	0
-46.74	0.0117798	0	-0.0511017	0	-0.10672	0	-0.0735626	0	-0.0691223	0	-0.104034	0
-45.74	0.00990295	0	-0.0628204	0	-0.10376	0	-0.072464	0	-0.0663147	0	-0.0892029	0
-44.74	0.000991821	0	-0.0646973	0	-0.0992279	0	-0.0743408	0	-0.0719299	0	-0.0835724	0
-43.74	-0.0018158	0	-0.0675049	0	-0.0992279	0	-0.0684052	0	-0.0858459	0	-0.0785675	0
-42.74	0.00709534	0	-0.0614166	0	-0.102036	0	-0.0665283	0	-0.1035	0	-0.0738831	0
-41.74	0.00521851	0	-0.0545349	0	-0.0931244	0	-0.0607452	0	-0.128815	0	-0.0816956	0
-40.74	0.0169373	0	-0.0526581	0	-0.102036	0	-0.0488739	0	-0.131622	0	-0.0816956	0
-39.74	0.0247498	0	-0.0437622	0	-0.0871887	0	-0.0469971	0	-0.131622	0	-0.0816956	0
-38.74	0.0236511	0	-0.0437622	0	-0.0871887	0	-0.0548096	0	-0.131622	0	-0.0816956	0
-37.74	0.0149078	0	-0.0292206	0	-0.0735931	0	-0.0693359	0	-0.131622	0	-0.0681	0
-36.74	0.0188141	0	-0.0303192	0	-0.0637512	0	-0.059494	0	-0.115692	0	-0.0640411	0
-35.74	0.0158386	0	-0.03125	0	-0.0559387	0	-0.0516815	0	-0.0961609	0	-0.0532532	0
-34.74	0.00709534	0	-0.0362549	0	-0.0501556	0	-0.0665283	0	-0.0738068	0	-0.0413818	0
-33.74	0.0169373	0	-0.0526581	0	-0.0648499	0	-0.0712128	0	-0.0738068	0	-0.024826	0
-32.74	0.0219269	0	-0.0675049	0	-0.0481262	0	-0.0634003	0	-0.0542755	0	-0.0296631	0
-31.74	0.0364685	0	-0.0604706	0	-0.0364075	0	-0.0498047	0	-0.046463	0	-0.0277863	0
-30.74	0.0247498	0	-0.0526581	0	-0.0345306	0	-0.0516815	0	-0.0211487	0	-0.0365448	0
-29.74	0.0158386	0	-0.0437622	0	-0.0246887	0	-0.0516815	0	-0.0300598	0	-0.0296631	0
-28.74	0.00131226	0	-0.0214081	0	-0.031723	0	-0.0399628	0	-0.0241241	0	-0.0141907	0
-27.74	0.00427246	0	0.00701904	0	-0.0364075	0	-0.0232544	0	-0.015213	0	-0.0113831	0
-26.74	-0.00369263	0	0.0246887	0	-0.0275116	0	-0.0204315	0	-0.0222473	0	-0.00544739	0
-25.74	0.00239563	0	0.0460815	0	-0.0246887	0	-0.00558472	0	-0.0328674	0	0.0170593	0
-24.74	0.0278778	0	0.0548401	0	-0.0246887	0	0.0158081	0	-0.0347443	0	0.0347137	0
-23.74	0.0609894	0	0.0656128	0	-0.0157928	0	0.0647278	0	-0.0300598	0	0.0425262	0
-22.74	0.0697479	0	0.085144	0	0.000778198	0	0.0712891	0	-0.015213	0	0.0620575	0
-21.74	0.0922394	0	0.0996857	0	0.0310822	0	0.0722198	0	-0.00161743	0	0.0425262	0
-20.74	0.0922394	0	0.107498	0	0.0417175	0	0.0772247	0	0.00431824	0	0.0425262	0
-19.74	0.0892792	0	0.119217	0	0.0534363	0	0.0819092	0	0.0238495	0	0.0337677	0
-18.74	0.0774078	0	0.123901	0	0.0670319	0	0.0712891	0	0.0550995	0	0.022995	0
-17.74	0.0638123	0	0.121094	0	0.0740509	0	0.0740967	0	0.062912	0	0.0425262	0
-16.74	0.0638123	0	0.122025	0	0.0757751	0	0.0694122	0	0.062912	0	0.054245	0
-15.74	0.0638123	0	0.121094	0	0.0729675	0	0.0830078	0	0.0835266	0	0.0737762	0
-14.74	0.0656891	0	0.112183	0	0.0701447	0	0.0858154	0	0.094162	0	0.0933075	0
-13.74	0.0744324	0	0.10437	0	0.0740509	0	0.0740967	0	0.0882263	0	0.106903	0
-12.74	0.0969391	0	0.105621	0	0.0710907	0	0.0662842	0	0.0891571	0	0.0979919	0
-11.74	0.107559	0	0.118271	0	0.0612488	0	0.0605011	0	0.0765076	0	0.0961151	0
-10.74	0.139908	0	0.110306	0	0.064209	0	0.0712891	0	0.105881	0	0.0862732	0
-9.74	0.136932	0	0.113281	0	0.0573425	0	0.0694122	0	0.107758	0	0.0667419	0
-8.74	0.14772	0	0.119217	0	0.0562439	0	0.0694122	0	0.123535	0	0.0550232	0
-7.74	0.159119	0	0.10437	0	0.0506134	0	0.0545654	0	0.139008	0	0.06987	0
-6.74	-0.140717	0	-0.21376	0	-0.073761	0	-0.231689	0	0.0144653	0	-0.0791931	0
-5.74	-0.401352	0	-0.402191	0	-0.232666	0	-0.402771	0	-0.453964	0	-0.359192	0
-4.74	-0.386185	0	-0.271729	0	-0.198593	0	-0.319656	0	-0.38475	0	-0.233887	0
-3.74	-0.392746	0	-0.308136	0	-0.141098	0	-0.343399	0	-0.438187	0	-0.281693	0
-2.74	-0.164627	0	0.015152	0	-0.0237579	0	0.0358124	0	-0.198334	0	-0.0901337	0
-1.74	0.0825653	0	0.198593	0	0.098587	0	-0.0960541	0	0.0647888	0	0.122986	0
-0.739998	-0.312439	0	-0.270157	0	-0.190781	0	-0.255905	0	-0.375534	0	-0.30217	0
0.260002	-5.30307	5.13896	-19.6161	4.63157	-4.545	3.83437	-57.1462	3.41903	-0.194595	2.178	-9.49904	1.835
1.26	-11.2865	5.20415	-15.6403	4.66093	-38.1945	3.84351	23.2111	3.41909	-52.7304	2.17803	-13.3498	1.83501
2.26	7.41397	5.26925	14.632	4.69027	19.217	3.85263	11.5577	3.41916	-1.62021	2.17806	9.62331	1.83501
3.26	3.28537	5.33425	6.13078	4.71959	6.70874	3.86176	5.49066	3.41922	7.29837	2.17808	4.20299	1.83501
4.26	2.59241	5.39916	4.37563	4.74888	4.3253	3.87087	4.18222	3.41928	4.86838	2.17811	3.08658	1.83502
5.26	2.5699	5.46398	4.07014	4.77816	3.96875	3.87999	3.93457	3.41934	3.83119	2.17814	2.84674	1.83502
6.26	2.67256	5.5287	4.02406	4.80742	3.91547	3.8891	3.843	3.4194	3.54791	2.17816	2.82034	1.83503
7.26	2.78146	5.59333	4.07094	4.83665	3.89296	3.89821	3.8141	3.41946	3.47337	2.17819	2.84972	1.83503
8.26	2.89552	5.65787	4.11108	4.86587	3.87578	3.90731	3.79488	3.41952	3.45963	2.17822	2.84581	1.83504
9.26	3.04318	5.72232	4.11421	4.89507	3.87891	3.91641	3.7944	3.41958	3.47916	2.17824	2.85471	1.83504
10.26	3.17209	5.78668	4.13797	4.92424	3.89671	3.9255	3.80035	3.41964	3.49088	2.17827	2.85002	1.83505
11.26	3.26083	5.85095	4.17796	4.9534	3.91249	3.93459	3.79753	3.4197	3.47868	2.17829	2.84534	1.83505
12.26	3.34428	5.91512	4.20828	4.98253	3.92328	3.94368	3.80176	3.41976	3.4604	2.17832	2.84065	1.83506
13.26	3.45178	5.9792	4.24547	5.01165	3.94687	3.95276	3.82535	3.41982	3.46651	2.17835	2.8555	1.83506
14.26	3.58382	6.04319	4.265	5.04075	3.95656	3.96184	3.83612	3.41988	3.47948	2.17837	2.84564	1.83507
15.26	3.69615	6.10709	4.31015	5.06982	3.95766	3.97091	3.84207	3.41994	3.49619	2.1784	2.83502	1.83507
16.26	3.8213	6.1709	4.32593	5.09888	3.96172	3.97998	3.85988	3.42	3.50322	2.17843	2.83127	1.83507
17.26	3.95319	6.23462	4.36922	5.12791	3.97249	3.98905	3.86972	3.42006	3.49431	2.17845	2.81955	1.83508
18.26	4.06349	6.29825	4.42313	5.15693	3.98734	3.99811	3.84909	3.42012	3.47197	2.17848	2.81674	1.83508
19.26	4.17897	6.36178	4.48781	5.18592	4.00218	4.00717	3.86113	3.42018	3.44072	2.1785	2.80502	1.83509
20.26	4.28224	6.42523	4.5325	5.2149	4.0128	4.01622	3.86691	3.42024	3.42542	2.17853	2.80502	1.83509
21.26	4.38881	6.48858	4.56561	5.24385	4.04124	4.02527	3.89629	3.4203	3.38916	2.17856	2.80502	1.8351
22.26	4.46974	6.55185	4.60281	5.27278	4.06078	4.03431	3.90691	3.42036	3.36212	2.17858	2.80502	1.8351
23.26	4.58522	6.61502	4.64188	5.3017	4.07249	4.04335	3.92363	3.42042	3.33791	2.17861	2.80612	1.83511
24.26	4.70912	6.67811	4.68094	5.33059	4.07718	4.05239	3.93613	3.42048	3.32323	2.17864	2.79721	1.83511
25.26	4.8185	6.7411	4.73468	5.35947	4.0753	4.06143	3.933	3.42054	3.30275	2.17866	2.77299	1.83512
26.26	4.95444	6.80401	4.77469	5.38832	4.07718	4.07045	3.9205	3.4206	3.28322	2.17869	2.77299	1.83512
27.26	5.07741	6.86682	4.83328	5.41716	4.08	4.07948	3.89206	3.42066	3.29213	2.17871	2.75534	1.83513
28.26	5.19662	6.92955	4.87234	5.44597	4.0889	4.0885	3.87753	3.42072	3.30478	2.17874	2.74455	1.83513
29.26	5.29005	6.99219	4.90265	5.47477	4.09671	4.09752	3.86972	3.42078	3.31447	2.17877	2.74753	1.83513
30.26	5.38881	7.05474	4.94266	5.50354	4.12328	4.10653	3.85332	3.42084	3.30666	2.17879	2.72971	1.83514
31.26	5.48647	7.11719	4.97108	5.5323	4.15453	4.11554	3.87285	3.4209	3.29494	2.17882	2.72096	1.83514
32.26	5.58209	7.17956	4.99937	5.56103	4.17406	4.12454	3.86394	3.42096	3.29306	2.17885	2.70737	1.83515
33.26	5.6924	7.24184	5.02968	5.58975	4.18468	4.13354	3.858	3.42102	3.27541	2.17887	2.69846	1.83515
34.26	5.76459	7.30404	5.06874	5.61844	4.2014	4.14254	3.85519	3.42108	3.23526	2.1789	2.68784	1.83516
35.26	5.87819	7.36614	5.09811	5.64712	4.21312	4.15153	3.85612	3.42114	3.214	2.17892	2.67018	1.83516
36.26	5.99318	7.42815	5.13437	5.67578	4.21312	4.16052	3.85988	3.4212	3.20322	2.17895	2.6683	1.83517
37.26	6.08803	7.49008	5.18234	5.70441	4.21906	4.16951	3.858	3.42126	3.18869	2.17898	2.66643	1.83517
38.26	6.18959	7.55192	5.2164	5.73303	4.21031	4.17849	3.85612	3.42132	3.17384	2.179	2.65659	1.83518
39.26	6.30788	7.61367	5.25359	5.76162	4.19952	4.18746	3.858	3.42138	3.16135	2.17903	2.64877	1.83518
40.26	6.40646	7.67533	5.28391	5.7902	4.20421	4.19644	3.858	3.42144	3.15854	2.17905	2.63705	1.83518
41.26	6.5071	7.73691	5.31218	5.81876	4.17593	4.20541	3.84441	3.4215	3.14182	2.17908	2.63112	1.83519
42.26	6.60568	7.79839	5.33749	5.8473	4.15343	4.21437	3.83566	3.42156	3.12228	2.17911	2.62611	1.83519
43.26	6.71225	7.85979	5.36594	5.87581	4.1564	4.22333	3.81316	3.42162	3.10869	2.17913	2.61252	1.8352
44.26	6.81677	7.9211	5.42078	5.90431	4.14561	4.23229	3.81035	3.42168	3.10306	2.17916	2.6008	1.8352
45.26	6.92006	7.98233	5.46172	5.93279	4.15765	4.24124	3.78909	3.42174	3.11478	2.17918	2.57143	1.83521
46.26	7.00381	8.04346	5.50078	5.96125	4.19672	4.25019	3.79597	3.4218	3.12541	2.17921	2.56081	1.83521
47.26	7.08099	8.10451	5.56047	5.98969	4.21735	4.25913	3.79192	3.42186	3.12822	2.17924	2.55893	1.83522
48.26	7.17474	8.16547	5.58749	6.0181	4.23969	4.26807	3.76237	3.42192	3.13322	2.17926	2.54721	1.83522
49.26	7.24974	8.22635	5.59921	6.0465	4.23969	4.27701	3.75957	3.42198	3.13618	2.17929	2.5394	1.83523
50.26	7.3349	8.28714	5.62781	6.07488	4.23077	4.28594	3.76535	3.42204	3.13713	2.17932	2.54721	1.83523
51.26	7.41115	8.34784	5.67578	6.10324	4.21625	4.29487	3.74284	3.4221	3.11292	2.17934	2.54721	1.83524
52.26	7.49225	8.40846	5.7178	6.13158	4.2475	4.30379	3.74004	3.42216	3.11603	2.17937	2.55002	1.83524
53.26	7.58022	8.46899	5.75781	6.1599	4.25063	4.31271	3.74895	3.42222	3.1179	2.17939	2.53549	1.83524
54.26	7.66115	8.52943	5.77625	6.18821	4.28375	4.32163	3.74394	3.42228	3.11603	2.17942	2.5444	1.83525
55.26	7.75287	8.58979	5.78703	6.21649	4.28766	4.33054	3.77238	3.42234	3.1179	2.17945	2.52768	1.83525
56.26	7.85443	8.65006	5.81641	6.24475	4.29953	4.33945	3.77409	3.4224	3.09416	2.17947	2.5394	1.83526
57.26	7.92474	8.71024	5.84953	6.27299	4.315	4.34835	3.77707	3.42246	3.07463	2.1795	2.5394	1.83526
58.26	8.02756	8.77034	5.87781	6.30122	4.30296	4.35725	3.75143	3.42251	3.04947	2.17952	2.52768	1.83527
59.26	8.11334	8.83036	5.92766	6.32942	4.30421	4.36615	3.7291	3.42257	3.03369	2.17955	2.52768	1.83527
60.26	8.18771	8.89028	5.97343	6.3576	4.33734	4.37504	3.68893	3.42263	3.01634	2.17958	2.52455	1.83528
61.26	8.27663	8.95013	6.01563	6.38577	4.33031	4.38393	3.69035	3.42269	3.01166	2.1796	2.50394	1.83528
62.26	8.37209	9.00988	6.06358	6.41391	4.32672	4.39282	3.69785	3.42275	3.02057	2.17963	2.49924	1.83529
63.26	8.46693	9.06956	6.11249	6.44204	4.32562	4.4017	3.70488	3.42281	3.04103	2.17965	2.46986	1.83529
64.26	8.54193	9.12914	6.16827	6.47014	4.31969	4.41057	3.70956	3.42287	3.04291	2.17968	2.47096	1.83529
65.26	8.62396	9.18864	6.22968	6.49823	4.3089	4.41945	3.7155	3.42293	3.04291	2.17971	2.47502	1.8353
66.26	8.70491	9.24806	6.26563	6.5263	4.3089	4.42831	3.71144	3.42299	3.04103	2.17973	2.47096	1.8353
67.26	8.80365	9.30739	6.30765	6.55435	4.30797	4.43718	3.69785	3.42305	3.0401	2.17976	2.47502	1.83531
68.26	8.90521	9.36664	6.32703	6.58237	4.31781	4.44604	3.69284	3.42311	3.02338	2.17978	2.48581	1.83531
69.26	9.01459	9.42581	6.34953	6.61038	4.33734	4.45489	3.6694	3.42317	3.01869	2.17981	2.48862	1.83532
70.26	9.09271	9.48489	6.34766	6.63837	4.35797	4.46375	3.66066	3.42323	3.00385	2.17983	2.47971	1.83532
71.26	9.17006	9.54388	6.36436	6.66634	4.38625	4.4726	3.65097	3.42329	3.0051	2.17986	2.47096	1.83533
72.26	9.25099	9.60279	6.38672	6.69429	4.41656	4.48144	3.63629	3.42335	3.01869	2.17989	2.46017	1.83533
73.26	9.33209	9.66162	6.44061	6.72223	4.42719	4.49028	3.62753	3.4234	3.02057	2.17991	2.45143	1.83534
74.26	9.42006	9.72036	6.46172	6.75014	4.4389	4.49912	3.63644	3.42346	3.00385	2.17994	2.43784	1.83534
75.26	9.48146	9.77902	6.47844	6.77803	4.42999	4.50795	3.64519	3.42352	2.99603	2.17996	2.42111	1.83534
76.26	9.58022	9.8376	6.49609	6.8059	4.43375	4.51678	3.64426	3.42358	2.95587	2.17999	2.40659	1.83535
77.26	9.66302	9.89609	6.51563	6.83376	4.43187	4.5256	3.63925	3.42364	2.914	2.18002	2.39767	1.83535
78.26	9.73444	9.9545	6.54405	6.86159	4.44952	4.53442	3.63925	3.4237	2.87384	2.18004	2.40065	1.83536
79.26	9.81349	10.0128	6.6214	6.88941	4.4525	4.54324	3.61862	3.42376	2.86041	2.18007	2.39877	1.83536
80.26	9.88881	10.0711	6.6739	6.91721	4.45844	4.55205	3.61862	3.42382	2.84369	2.18009	2.39767	1.83537
81.26	9.95912	10.1292	6.7178	6.94498	4.45844	4.56086	3.6216	3.42388	2.84056	2.18012	2.40065	1.83537
82.26	10.0294	10.1873	6.76062	6.97274	4.47015	4.56967	3.61862	3.42394	2.8465	2.18015	2.40939	1.83538
83.26	10.1104	10.2453	6.79094	7.00048	4.48969	4.57847	3.62753	3.42399	2.84056	2.18017	2.40659	1.83538
84.26	10.1797	10.3032	6.8075	7.0282	4.48859	4.58726	3.6244	3.42405	2.8465	2.1802	2.41237	1.83539
85.26	10.251	10.361	6.83781	7.0559	4.49046	4.59606	3.61081	3.42411	2.86432	2.18022	2.41049	1.83539
86.26	10.3232	10.4188	6.88202	7.08358	4.51109	4.60485	3.59035	3.42417	2.87198	2.18025	2.38986	1.83539
87.26	10.3993	10.4764	6.91985	7.11124	4.53156	4.61363	3.59128	3.42423	2.87994	2.18027	2.37924	1.8354
88.26	10.4815	10.534	6.94531	7.13889	4.54703	4.62241	3.59128	3.42429	2.87494	2.1803	2.36752	1.8354
89.26	10.5685	10.5915	6.98125	7.16651	4.54688	4.63119	3.60207	3.42435	2.85431	2.18033	2.34799	1.83541
90.26	10.6505	10.6489	7.0125	7.19412	4.56656	4.63996	3.61972	3.42441	2.8526	2.18035	2.33034	1.83541
91.26	10.7197	10.7063	7.03391	7.2217	4.55577	4.64873	3.63034	3.42447	2.83009	2.18038	2.30284	1.83542
92.26	10.7872	10.7635	7.06328	7.24927	4.55296	4.6575	3.64519	3.42452	2.79869	2.1804	2.27956	1.83542
93.26	10.8576	10.8207	7.10828	7.27682	4.5589	4.66626	3.66066	3.42458	2.7626	2.18043	2.28049	1.83543
94.26	10.9474	10.8778	7.16515	7.30435	4.57562	4.67502	3.64987	3.42464	2.75853	2.18046	2.27768	1.83543
95.26	11.0235	10.9348	7.21593	7.33186	4.58141	4.68377	3.63815	3.4247	2.739	2.18048	2.26003	1.83543
96.26	11.0791	10.9917	7.26953	7.35935	4.58311	4.69252	3.63222	3.42476	2.74213	2.18051	2.25815	1.83544
97.26	11.1673	11.0486	7.31641	7.38682	4.59203	4.70127	3.64285	3.42482	2.75385	2.18053	2.26987	1.83544
98.26	11.2482	11.1053	7.34062	7.41427	4.59984	4.71001	3.63409	3.42488	2.78822	2.18056	2.27768	1.83545
99.26	11.3185	11.162	7.36719	7.4417	4.6264	4.71875	3.63034	3.42494	2.80775	2.18058	2.26987	1.83545
100.26	11.3916	11.2186	7.40031	7.46912	4.64281	4.72748	3.6244	3.42499	2.80463	2.18061	2.26987	1.83546
101.26	11.4727	11.2752	7.42578	7.49651	4.64	4.73621	3.63034	3.42505	2.79291	2.18064	2.26408	1.83546
102.26	11.549	11.3316	7.4464	7.52389	4.65343	4.74494	3.61269	3.42511	2.77931	2.18066	2.27299	1.83547
103.26	11.6161	11.388	7.48828	7.55125	4.65343	4.75366	3.59315	3.42517	2.75572	2.18069	2.28377	1.83547
104.26	11.6776	11.4442	7.51843	7.57859	4.64749	4.76238	3.58534	3.42523	2.72823	2.18071	2.28784	1.83548
105.26	11.7451	11.5004	7.54875	7.60591	4.64171	4.77109	3.55692	3.42529	2.71666	2.18074	2.29533	1.83548
106.26	11.8213	11.5566	7.57109	7.63321	4.64468	4.7798	3.53348	3.42535	2.709	2.18076	2.27768	1.83548
107.26	11.8829	11.6126	7.59343	7.66049	4.64281	4.78851	3.52284	3.4254	2.71198	2.18079	2.26596	1.83549
108.26	11.9424	11.6686	7.61203	7.68775	4.62921	4.79721	3.50613	3.42546	2.72963	2.18082	2.27768	1.83549
109.26	12.0177	11.7244	7.6414	7.715	4.63219	4.80591	3.50644	3.42552	2.72963	2.18084	2.27174	1.8355
110.26	12.088	11.7802	7.67265	7.74222	4.6339	4.8146	3.50925	3.42558	2.70306	2.18087	2.26987	1.8355
111.26	12.1594	11.836	7.71172	7.76943	4.64171	4.82329	3.52003	3.42564	2.71478	2.18089	2.27299	1.83551
112.26	12.2315	11.8916	7.75969	7.79662	4.66422	4.83198	3.52097	3.4257	2.69806	2.18092	2.2758	1.83551
113.26	12.2841	11.9472	7.80859	7.82379	4.68468	4.84066	3.51112	3.42576	2.69525	2.18094	2.26424	1.83552
114.26	12.3408	12.0027	7.8239	7.85094	4.715	4.84934	3.50925	3.42581	2.68634	2.18097	2.26518	1.83552
115.26	12.4219	12.0581	7.8425	7.87807	4.73077	4.85802	3.52003	3.42587	2.69713	2.18099	2.25815	1.83553
116.26	12.4951	12.1134	7.86296	7.90518	4.75499	4.86669	3.54941	3.42593	2.68634	2.18102	2.25815	1.83553
117.26	12.5596	12.1686	7.87375	7.93227	4.75218	4.87536	3.56003	3.42599	2.71198	2.18105	2.26096	1.83553
118.26	12.6466	12.2238	7.89421	7.95935	4.77171	4.88402	3.56784	3.42605	2.70869	2.18107	2.24643	1.83554
119.26	12.711	12.2789	7.92453	7.98641	4.7764	4.89268	3.58144	3.4261	2.70181	2.1811	2.24049	1.83554
120.26	12.7705	12.3339	7.96452	8.01344	4.78812	4.90134	3.58426	3.42616	2.67151	2.18112	2.22189	1.83555
121.26	12.838	12.3888	8.00546	8.04046	4.79405	4.90999	3.56941	3.42622	2.67462	2.18115	2.20847	1.83555
122.26	12.9201	12.4437	8.0278	8.06746	4.80296	4.91864	3.54706	3.42628	2.6776	2.18117	2.19377	1.83556
123.26	12.9787	12.4985	8.07297	8.09444	4.80765	4.92728	3.53925	3.42634	2.67744	2.1812	2.17722	1.83556
124.26	13.049	12.5532	8.11484	8.12141	4.81468	4.93592	3.53925	3.4264	2.69244	2.18122	2.16362	1.83557
125.26	13.1271	12.6078	8.15202	8.14835	4.81358	4.94456	3.53629	3.42645	2.68822	2.18125	2.14877	1.83557
126.26	13.2032	12.6623	8.2	8.17528	4.82718	4.95319	3.52753	3.42651	2.67744	2.18128	2.1519	1.83557
127.26	13.2627	12.7168	8.23312	8.20218	4.84953	4.96182	3.52753	3.42657	2.6765	2.1813	2.15768	1.83558
128.26	13.3096	12.7712	8.2625	8.22907	4.86906	4.97044	3.52567	3.42663	2.6765	2.18133	2.15581	1.83558
129.26	13.3829	12.8255	8.30156	8.25594	4.89156	4.97907	3.52567	3.42669	2.67932	2.18135	2.16643	1.83559
130.26	13.4396	12.8797	8.31686	8.28279	4.90031	4.98768	3.52753	3.42674	2.65979	2.18138	2.17612	1.83559
131.26	13.5099	12.9339	8.3425	8.30963	4.90031	4.9963	3.53348	3.4268	2.66275	2.1814	2.19675	1.8356
132.26	13.5685	12.988	8.35703	8.33644	4.91422	5.00491	3.53348	3.42686	2.65088	2.18143	2.20549	1.8356
133.26	13.6537	13.042	8.38249	8.36324	4.91515	5.01351	3.55409	3.42692	2.6315	2.18145	2.20143	1.83561
134.26	13.7208	13.0959	8.42734	8.39001	4.93781	5.02211	3.56473	3.42698	2.62073	2.18148	2.18784	1.83561
135.26	13.7794	13.1497	8.46172	8.41677	4.94547	5.03071	3.57362	3.42703	2.6179	2.18151	2.18002	1.83561
136.26	13.8497	13.2035	8.50656	8.44351	4.94827	5.0393	3.5619	3.42709	2.63087	2.18153	2.1683	1.83562
137.26	13.9232	13.2572	8.5278	8.47023	4.94531	5.04789	3.57362	3.42715	2.64447	2.18156	2.16362	1.83562
138.26	13.9844	13.3108	8.56796	8.49694	4.95609	5.05648	3.56473	3.42721	2.65509	2.18158	2.17424	1.83563
139.26	14.0529	13.3643	8.59531	8.52362	4.9678	5.06506	3.55301	3.42727	2.64915	2.18161	2.18611	1.83563
140.26	14.0997	13.4178	8.60983	8.55029	5.0139	5.07364	3.53925	3.42732	2.63744	2.18163	2.18596	1.83564
141.26	14.1533	13.4712	8.62656	8.57693	5.04515	5.08222	3.51675	3.42738	2.63431	2.18166	2.18315	1.83564
142.26	14.2002	13.5245	8.655	8.60356	5.0753	5.09079	3.52159	3.42744	2.61182	2.18168	2.18784	1.83565
143.26	14.2646	13.5777	8.69218	8.63017	5.07718	5.09935	3.50191	3.4275	2.60306	2.18171	2.19675	1.83565
144.26	14.3115	13.6309	8.72343	8.65677	5.07718	5.10792	3.49316	3.42756	2.59837	2.18173	2.19955	1.83566
145.26	14.3622	13.684	8.7625	8.68334	5.06828	5.11648	3.49129	3.42761	2.58948	2.18176	2.19955	1.83566
146.26	14.4279	13.737	8.79843	8.7099	5.06047	5.12503	3.4991	3.42767	2.57884	2.18179	2.18784	1.83566
147.26	14.4982	13.7899	8.82858	8.73643	5.06546	5.13358	3.50613	3.42773	2.57697	2.18181	2.18596	1.83567
148.26	14.5401	13.8428	8.86765	8.76295	5.07718	5.14213	3.48846	3.42779	2.57291	2.18184	2.15378	1.83567
149.26	14.5821	13.8955	8.89796	8.78945	5.09671	5.15067	3.48972	3.42784	2.55635	2.18186	2.13518	1.83568
150.26	14.6369	13.9483	8.93015	8.81593	5.10547	5.15921	3.5005	3.4279	2.56244	2.18189	2.1069	1.83568
151.26	14.6868	14.0009	8.97531	8.8424	5.09671	5.16775	3.49254	3.42796	2.55931	2.18191	2.10112	1.83569
152.26	14.7404	14.0534	9.01422	8.86884	5.10843	5.17628	3.48846	3.42802	2.55042	2.18194	2.08627	1.83569
153.26	14.7783	14.1059	9.05344	8.89527	5.11436	5.18481	3.4827	3.42808	2.55463	2.18196	2.06674	1.8357
154.26	14.8469	14.1583	9.09531	8.92168	5.12515	5.19334	3.48846	3.42813	2.5565	2.18199	2.06784	1.8357
155.26	14.9349	14.2107	9.13828	8.94807	5.14749	5.20186	3.48535	3.42819	2.55635	2.18201	2.05893	1.8357
156.26	15.0266	14.2629	9.18906	8.97444	5.16093	5.21037	3.46284	3.42825	2.56119	2.18204	2.06487	1.83571
157.26	15.0951	14.3151	9.20749	9.0008	5.16985	5.21889	3.4827	3.42831	2.5426	2.18207	2.05612	1.83571
158.26	15.1701	14.3672	9.23172	9.02713	5.17171	5.2274	3.49628	3.42836	2.53088	2.18209	2.05315	1.83572
159.26	15.2208	14.4192	9.24062	9.05345	5.14328	5.2359	3.48425	3.42842	2.52493	2.18212	2.0444	1.83572
160.26	15.2794	14.4712	9.25125	9.07975	5.11781	5.2444	3.47253	3.42848	2.51135	2.18214	2.05424	1.83573
161.26	15.3302	14.5231	9.27187	9.10603	5.09953	5.2529	3.44519	3.42854	2.51917	2.18217	2.04831	1.83573
162.26	15.3799	14.5749	9.2825	9.13229	5.10139	5.2614	3.43347	3.42859	2.51634	2.18219	2.03362	1.83574
163.26	15.4337	14.6266	9.33046	9.15854	5.11125	5.26989	3.41394	3.42865	2.51917	2.18222	2.02768	1.83574
164.26	15.501	14.6783	9.36639	9.18476	5.11311	5.27837	3.41504	3.42871	2.51321	2.18224	2.01706	1.83574
165.26	15.5508	14.7299	9.39188	9.21097	5.14561	5.28685	3.41206	3.42877	2.51321	2.18227	2.0258	1.83575
166.26	15.6104	14.7814	9.43094	9.23716	5.17874	5.29533	3.42596	3.42882	2.49072	2.18229	2.01003	1.83575
167.26	15.669	14.8328	9.46515	9.26334	5.20421	5.30381	3.4494	3.42888	2.48306	2.18232	2.01408	1.83576
168.26	15.7287	14.8842	9.48563	9.28949	5.24625	5.31228	3.45222	3.42894	2.4801	2.18234	2.01706	1.83576
169.26	15.7813	14.9355	9.49765	9.31563	5.27141	5.32075	3.46004	3.42899	2.47229	2.18237	2.0258	1.83577
170.26	15.8302	14.9867	9.52312	9.34174	5.28203	5.32921	3.47066	3.42905	2.46057	2.18239	2.03549	1.83577
171.26	15.8721	15.0379	9.55344	9.36784	5.28999	5.33767	3.46785	3.42911	2.44603	2.18242	2.02487	1.83578
172.26	15.9173	15.0889	9.59921	9.39393	5.28203	5.34613	3.47081	3.42917	2.43509	2.18244	2.04253	1.83578
173.26	15.9708	15.1399	9.62047	9.41999	5.25687	5.35458	3.47176	3.42922	2.42151	2.18247	2.04128	1.83578
174.26	16.001	15.1909	9.65077	9.44604	5.26578	5.36303	3.47957	3.42928	2.41447	2.1825	2.03049	1.83579
175.26	16.0657	15.2417	9.69093	9.47206	5.25078	5.37147	3.4855	3.42934	2.41556	2.18252	2.03659	1.83579
176.26	16.1388	15.2925	9.72391	9.49807	5.24797	5.37991	3.49628	3.4294	2.41447	2.18255	2.03159	1.8358
177.26	16.1924	15.3432	9.74655	9.52406	5.25874	5.38835	3.4991	3.42945	2.42932	2.18257	2.03159	1.8358
178.26	16.2501	15.3938	9.78859	9.55004	5.27141	5.39678	3.48738	3.42951	2.44104	2.1826	2.0258	1.83581
179.26	16.3107	15.4444	9.81969	9.57599	5.2764	5.40521	3.49034	3.42957	2.44713	2.18262	2.02299	1.83581
180.26	16.3674	15.4949	9.84218	9.60193	5.27452	5.41364	3.47066	3.42962	2.44994	2.18265	2.03659	1.83582
181.26	16.4083	15.5453	9.86171	9.62785	5.28233	5.42206	3.45721	3.42968	2.45587	2.18267	2.00815	1.83582
182.26	16.4633	15.5957	9.89609	9.65375	5.28421	5.43048	3.46597	3.42974	2.45587	2.1827	2.00627	1.83582
183.26	16.5396	15.646	9.93796	9.67964	5.29875	5.43889	3.48566	3.4298	2.45775	2.18272	2.00534	1.83583
184.26	16.6118	15.6962	9.95937	9.7055	5.30061	5.4473	3.49722	3.42985	2.44104	2.18275	1.99455	1.83583
185.26	16.679	15.7463	9.98874	9.73135	5.30922	5.45571	3.49628	3.42991	2.43228	2.18277	1.99362	1.83584
186.26	16.7385	15.7964	10.0297	9.75718	5.30937	5.46411	3.51971	3.42997	2.43213	2.1828	1.99174	1.83584
187.26	16.7872	15.8464	10.0403	9.78299	5.32014	5.47251	3.53035	3.43002	2.42337	2.18282	2.00534	1.83585
188.26	16.8576	15.8963	10.0687	9.80879	5.33469	5.48091	3.5155	3.43008	2.42337	2.18285	2.01518	1.83585
189.26	16.8963	15.9461	10.0894	9.83457	5.33781	5.4893	3.49597	3.43014	2.42432	2.18287	2.00034	1.83586
190.26	16.9415	15.9959	10.1028	9.86032	5.35139	5.49769	3.47957	3.43019	2.43118	2.1829	1.99455	1.83586
191.26	16.9833	16.0456	10.1145	9.88607	5.36436	5.50607	3.47363	3.43025	2.43401	2.18292	1.9769	1.83586
192.26	17.0412	16.0953	10.1176	9.91179	5.39468	5.51445	3.46004	3.43031	2.4429	2.18295	1.96518	1.83587
193.26	17.083	16.1448	10.1331	9.93749	5.41515	5.52283	3.45113	3.43036	2.45166	2.18297	1.96518	1.83587
194.26	17.1282	16.1943	10.1341	9.96318	5.42171	5.5312	3.44832	3.43042	2.45181	2.183	1.96518	1.83588
195.26	17.1877	16.2437	10.1703	9.98885	5.44827	5.53957	3.44832	3.43048	2.43791	2.18302	1.97409	1.83588
196.26	17.2365	16.2931	10.2044	10.0145	5.45	5.54794	3.44238	3.43054	2.42041	2.18305	1.98581	1.83589
197.26	17.2766	16.3424	10.2328	10.0401	5.46077	5.5563	3.42566	3.43059	2.40384	2.18307	1.99565	1.83589
198.26	17.3302	16.3916	10.2541	10.0658	5.47531	5.56466	3.40926	3.43065	2.38901	2.1831	2.00627	1.8359
199.26	17.3693	16.4407	10.3003	10.0914	5.47249	5.57301	3.39441	3.43071	2.38713	2.18312	1.98581	1.8359
200.26	17.4083	16.4898	10.3539	10.1169	5.47249	5.58136	3.38972	3.43076	2.39775	2.18315	1.95737	1.8359
201.26	17.4572	16.5388	10.3942	10.1425	5.49297	5.58971	3.38972	3.43082	2.38901	2.18317	1.9644	1.83591
202.26	17.5071	16.5877	10.432	10.168	5.50374	5.59805	3.40643	3.43088	2.39603	2.1832	1.93784	1.83591
203.26	17.5774	16.6366	10.477	10.1936	5.50969	5.60639	3.41815	3.43093	2.39494	2.18322	1.94377	1.83592
204.26	17.6565	16.6854	10.5219	10.2191	5.53108	5.61472	3.43582	3.43099	2.39026	2.18325	1.93503	1.83592
205.26	17.7376	16.7341	10.552	10.2446	5.53984	5.62306	3.46317	3.43105	2.38431	2.18327	1.93315	1.83593
206.26	17.8107	16.7828	10.5628	10.27	5.55952	5.63138	3.48846	3.4311	2.37073	2.1833	1.94675	1.83593
207.26	17.8615	16.8314	10.595	10.2955	5.5889	5.63971	3.49019	3.43116	2.37073	2.18332	1.94064	1.83593
208.26	17.9122	16.8799	10.6234	10.3209	5.61125	5.64803	3.48145	3.43122	2.35306	2.18335	1.94675	1.83594
209.26	17.9502	16.9283	10.6595	10.3464	5.61594	5.65634	3.49129	3.43127	2.3512	2.18337	1.93784	1.83594
210.26	17.9755	16.9767	10.6839	10.3718	5.6386	5.66466	3.48145	3.43133	2.34525	2.1834	1.94955	1.83595
211.26	18.0088	17.025	10.6955	10.3972	5.63547	5.67297	3.46284	3.43139	2.34837	2.18342	1.94955	1.83595
212.26	18.0568	17.0733	10.7151	10.4225	5.63734	5.68127	3.44238	3.43144	2.35713	2.18345	1.94955	1.83596
213.26	18.1016	17.1214	10.7239	10.4479	5.63547	5.68957	3.42879	3.4315	2.36197	2.18347	1.94377	1.83596
214.26	18.1416	17.1695	10.7523	10.4732	5.64436	5.69787	3.41988	3.43156	2.38245	2.1835	1.94252	1.83597
215.26	18.1719	17.2176	10.7747	10.4985	5.65312	5.70617	3.41113	3.43161	2.39915	2.18352	1.9183	1.83597
216.26	18.2072	17.2655	10.8091	10.5238	5.64937	5.71446	3.40332	3.43167	2.38713	2.18355	1.88705	1.83597
217.26	18.2454	17.3134	10.85	10.5491	5.65312	5.72274	3.4241	3.43172	2.38135	2.18357	1.89409	1.83598
218.26	18.2912	17.3612	10.8723	10.5744	5.6553	5.73103	3.42879	3.43178	2.40103	2.1836	1.89908	1.83598
219.26	18.3302	17.409	10.9055	10.5996	5.68938	5.73931	3.43768	3.43184	2.39307	2.18362	1.9019	1.83599
220.26	18.3869	17.4567	10.9348	10.6249	5.69124	5.74758	3.44331	3.43189	2.38431	2.18365	1.91675	1.83599
221.26	18.4368	17.5043	10.9562	10.6501	5.70891	5.75585	3.44519	3.43195	2.36948	2.18367	1.94096	1.836
222.26	18.4893	17.5519	10.9817	10.6753	5.71359	5.76412	3.41081	3.43201	2.33635	2.1837	1.94565	1.836
223.26	18.5579	17.5994	11.007	10.7004	5.73312	5.77239	3.39441	3.43206	2.33057	2.18372	1.93503	1.83601
224.26	18.6076	17.6468	11.0325	10.7256	5.735	5.78065	3.38269	3.43212	2.3187	2.18375	1.93002	1.83601
225.26	18.6583	17.6941	11.0609	10.7507	5.74484	5.7889	3.3916	3.43218	2.32571	2.18377	1.9183	1.83601
226.26	18.7208	17.7414	11.0744	10.7759	5.74672	5.79716	3.39253	3.43223	2.33167	2.1838	1.9155	1.83602
227.26	18.7705	17.7886	11.1058	10.801	5.74484	5.80541	3.3916	3.43229	2.34837	2.18382	1.91362	1.83602
228.26	18.8185	17.8358	11.1145	10.8261	5.75546	5.81365	3.40926	3.43234	2.34229	2.18385	1.91956	1.83603
229.26	18.8576	17.8829	11.143	10.8511	5.76155	5.8219	3.42097	3.4324	2.32181	2.18387	1.93033	1.83603
230.26	18.9083	17.9299	11.1625	10.8762	5.77327	5.83013	3.42097	3.43246	2.32306	2.1839	1.94205	1.83604
231.26	18.968	17.9768	11.1848	10.9012	5.78203	5.83837	3.41394	3.43251	2.32884	2.18392	1.95268	1.83604
232.26	19.0099	18.0237	11.2281	10.9262	5.80171	5.8466	3.40643	3.43257	2.32181	2.18395	1.95268	1.83604
233.26	19.0638	18.0705	11.2611	10.9512	5.81516	5.85483	3.41206	3.43262	2.31682	2.18397	1.95549	1.83605
234.26	19.1282	18.1173	11.2933	10.9762	5.81516	5.86305	3.40222	3.43268	2.31682	2.184	1.94675	1.83605
235.26	19.1896	18.1639	11.3286	11.0012	5.81516	5.87127	3.40332	3.43274	2.31291	2.18402	1.92612	1.83606
236.26	19.2236	18.2106	11.3606	11.0262	5.82405	5.87949	3.40034	3.43279	2.29807	2.18405	1.9183	1.83606
237.26	19.263	18.2571	11.3937	11.0511	5.85422	5.8877	3.41113	3.43285	2.29025	2.18407	1.90768	1.83607
238.26	19.299	18.3036	11.4231	11.076	5.85422	5.89591	3.40613	3.43291	2.28745	2.1841	1.8969	1.83607
239.26	19.3469	18.35	11.4562	11.1009	5.86311	5.90411	3.42285	3.43296	2.28838	2.18412	1.89877	1.83608
240.26	19.3869	18.3963	11.4758	11.1258	5.88359	5.91232	3.43159	3.43302	2.28557	2.18415	1.90659	1.83608
241.26	19.4279	18.4426	11.5098	11.1507	5.89046	5.92051	3.42566	3.43307	2.28275	2.18417	1.9155	1.83608
242.26	19.4787	18.4888	11.5236	11.1755	5.87843	5.92871	3.42566	3.43313	2.28275	2.1842	1.9183	1.83609
243.26	19.5177	18.535	11.5461	11.2003	5.86594	5.9369	3.42285	3.43319	2.26917	2.18422	1.93002	1.83609
244.26	19.543	18.5811	11.5656	11.2251	5.87375	5.94509	3.44051	3.43324	2.28275	2.18425	1.93002	1.8361
245.26	19.5862	18.6271	11.5744	11.2499	5.86781	5.95327	3.44051	3.4333	2.27776	2.18427	1.92424	1.8361
246.26	19.6212	18.673	11.5909	11.2747	5.87375	5.96145	3.42566	3.43335	2.26604	2.1843	1.93315	1.83611
247.26	19.6505	18.7189	11.5861	11.2995	5.90813	5.96962	3.42879	3.43341	2.259	2.18432	1.92722	1.83611
248.26	19.7013	18.7647	11.588	11.3242	5.93343	5.9778	3.42987	3.43346	2.25432	2.18435	1.9155	1.83611
249.26	19.7404	18.8105	11.6047	11.349	5.97063	5.98597	3.43159	3.43352	2.23479	2.18437	1.8969	1.83612
250.26	19.7822	18.8562	11.6281	11.3737	5.99327	5.99413	3.43066	3.43358	2.20932	2.1844	1.9019	1.83612
251.26	19.8302	18.9018	11.6583	11.3984	6.02046	6.00229	3.43159	3.43363	2.21057	2.18442	1.9108	1.83613
252.26	19.8693	18.9474	11.6927	11.423	6.03203	6.01045	3.43956	3.43369	2.20462	2.18444	1.91049	1.83613
253.26	19.9173	18.9929	11.7375	11.4477	6.0428	6.0186	3.45113	3.43374	2.19572	2.18447	1.91049	1.83614
254.26	19.9591	19.0383	11.7825	11.4723	6.04984	6.02675	3.44707	3.4338	2.19572	2.18449	1.90471	1.83614
255.26	20.001	19.0837	11.8305	11.497	6.04562	6.0349	3.44331	3.43386	2.19572	2.18452	1.90659	1.83615
256.26	20.0508	19.129	11.8528	11.5216	6.05344	6.04304	3.43347	3.43391	2.20462	2.18454	1.88112	1.83615
257.26	20.0997	19.1742	11.8723	11.5462	6.04562	6.05118	3.42566	3.43397	2.20634	2.18457	1.87033	1.83615
258.26	20.1533	19.2194	11.9008	11.5707	6.03108	6.05932	3.42285	3.43402	2.20354	2.18459	1.86472	1.83616
259.26	20.2091	19.2645	11.9231	11.5953	6.03391	6.06745	3.40034	3.43408	2.22415	2.18462	1.85503	1.83616
260.26	20.2482	19.3095	11.9516	11.6198	6.04562	6.07558	3.3916	3.43413	2.22307	2.18464	1.82846	1.83617
261.26	20.3021	19.3545	11.9828	11.6444	6.03108	6.0837	3.40144	3.43419	2.23196	2.18467	1.79831	1.83617
262.26	20.3646	19.3994	12.0013	11.6689	6.03984	6.09182	3.40144	3.43424	2.23479	2.18469	1.80237	1.83618
263.26	20.4055	19.4443	12.0208	11.6934	6.05952	6.09994	3.3916	3.4343	2.22697	2.18472	1.79253	1.83618
264.26	20.4338	19.489	12.0344	11.7178	6.08281	6.10805	3.40144	3.43436	2.2301	2.18474	1.7897	1.83618
265.26	20.4758	19.5338	12.043	11.7423	6.08186	6.11616	3.41206	3.43441	2.23196	2.18477	1.79253	1.83619
266.26	20.4982	19.5784	12.04	11.7667	6.11311	6.12427	3.40926	3.43447	2.23196	2.18479	1.80612	1.83619
267.26	20.5294	19.623	12.0567	11.7911	6.11015	6.13237	3.42285	3.43452	2.23291	2.18482	1.80705	1.8362
268.26	20.5536	19.6675	12.0851	11.8155	6.12093	6.14047	3.44051	3.43458	2.23196	2.18484	1.80612	1.8362
269.26	20.5849	19.712	12.1223	11.8399	6.12375	6.14857	3.44238	3.43463	2.23196	2.18486	1.81487	1.83621
270.26	20.631	19.7564	12.1508	11.8643	6.13264	6.15666	3.44519	3.43469	2.24072	2.18489	1.81393	1.83621
271.26	20.6896	19.8008	12.1762	11.8887	6.14328	6.16475	3.44331	3.43474	2.24556	2.18491	1.83159	1.83621
272.26	20.7287	19.845	12.2094	11.913	6.15218	6.17283	3.4541	3.4348	2.23759	2.18494	1.82846	1.83622
273.26	20.7747	19.8892	12.2328	11.9373	6.155	6.18091	3.45113	3.43486	2.24368	2.18496	1.82565	1.83622
274.26	20.8255	19.9334	12.2434	11.9616	6.17265	6.18899	3.46191	3.43491	2.2554	2.18499	1.83549	1.83623
275.26	20.8665	19.9775	12.2648	11.9859	6.20015	6.19706	3.44519	3.43497	2.26604	2.18501	1.82065	1.83623
276.26	20.9213	20.0215	12.2872	12.0102	6.20578	6.20513	3.46004	3.43502	2.26416	2.18504	1.80893	1.83624
277.26	20.9516	20.0655	12.2961	12.0344	6.22063	6.2132	3.46004	3.43508	2.26321	2.18506	1.79721	1.83624
278.26	20.9935	20.1094	12.3048	12.0587	6.24202	6.22126	3.453	3.43513	2.26321	2.18509	1.80315	1.83625
279.26	21.0294	20.1532	12.3234	12.0829	6.23703	6.22932	3.43925	3.43519	2.24651	2.18511	1.80612	1.83625
280.26	21.0462	20.197	12.3351	12.1071	6.24484	6.23738	3.41785	3.43524	2.24182	2.18514	1.80002	1.83625
281.26	21.0951	20.2407	12.3645	12.1313	6.25266	6.24543	3.40613	3.4353	2.24838	2.18516	1.77956	1.83626
282.26	21.131	20.2843	12.3919	12.1554	6.25374	6.25348	3.3855	3.43535	2.23291	2.18518	1.78362	1.83626
283.26	21.1807	20.3279	12.4172	12.1796	6.27141	6.26152	3.37488	3.43541	2.23196	2.18521	1.7944	1.83627
284.26	21.2138	20.3714	12.4516	12.2037	6.27327	6.26956	3.36316	3.43546	2.22885	2.18523	1.80424	1.83627
285.26	21.2599	20.4149	12.4934	12.2278	6.28984	6.2776	3.35254	3.43552	2.20634	2.18526	1.79721	1.83628
286.26	21.3036	20.4583	12.5372	12.2519	6.31233	6.28564	3.35535	3.43557	2.19572	2.18528	1.78659	1.83628
287.26	21.3408	20.5016	12.5656	12.276	6.33469	6.29367	3.36128	3.43563	2.18509	2.18531	1.78471	1.83628
288.26	21.3693	20.5449	12.588	12.3001	6.33656	6.30169	3.35535	3.43568	2.17619	2.18533	1.78471	1.83629
289.26	21.3966	20.5881	12.6281	12.3241	6.34531	6.30972	3.34363	3.43574	2.17337	2.18536	1.76408	1.83629
290.26	21.4251	20.6313	12.6416	12.3482	6.35422	6.31774	3.35535	3.43579	2.16838	2.18538	1.75534	1.8363
291.26	21.4455	20.6744	12.6672	12.3722	6.36499	6.32575	3.36426	3.43585	2.15979	2.18541	1.76236	1.8363
292.26	21.4758	20.7174	12.6927	12.3962	6.36594	6.33376	3.37019	3.4359	2.16556	2.18543	1.76408	1.83631
293.26	21.5188	20.7603	12.7062	12.4202	6.36015	6.34177	3.37019	3.43596	2.16447	2.18545	1.75815	1.83631
294.26	21.5607	20.8033	12.7328	12.4442	6.37202	6.34978	3.36128	3.43601	2.16447	2.18548	1.75534	1.83631
295.26	21.6115	20.8461	12.7494	12.4681	6.38359	6.35778	3.36143	3.43607	2.17619	2.1855	1.75034	1.83632
296.26	21.6565	20.8889	12.7737	12.492	6.38264	6.36578	3.3566	3.43612	2.17619	2.18553	1.74455	1.83632
297.26	21.6896	20.9316	12.7942	12.516	6.38547	6.37377	3.35847	3.43618	2.17026	2.18555	1.74753	1.83633
298.26	21.718	20.9743	12.8255	12.5399	6.38547	6.38176	3.35254	3.43623	2.16447	2.18558	1.74174	1.83633
299.26	21.7669	21.0169	12.8575	12.5638	6.37375	6.38975	3.35847	3.43629	2.17151	2.1856	1.75346	1.83634
300.26	21.8091	21.0594	12.8859	12.5876	6.37375	6.39773	3.35847	3.43634	2.17619	2.18563	1.75346	1.83634
301.26	21.8646	21.1019	12.92	12.6115	6.39046	6.40571	3.34082	3.4364	2.18509	2.18565	1.75534	1.83634
302.26	21.9055	21.1443	12.9562	12.6353	6.40688	6.41369	3.34175	3.43645	2.17619	2.18567	1.76518	1.83635
303.26	21.9455	21.1867	12.9786	12.6591	6.41672	6.42166	3.33301	3.43651	2.16916	2.1857	1.7758	1.83635
304.26	21.9805	21.2289	13.0158	12.6829	6.42453	6.42963	3.33894	3.43656	2.14182	2.18572	1.77768	1.83636
305.26	22.0127	21.2712	13.0344	12.7067	6.44406	6.4376	3.35066	3.43662	2.13322	2.18575	1.78189	1.83636
306.26	22.0313	21.3134	13.0684	12.7305	6.44875	6.44556	3.35535	3.43667	2.11948	2.18577	1.78081	1.83637
307.26	22.0607	21.3555	13.082	12.7543	6.44406	6.45352	3.37207	3.43673	2.13245	2.1858	1.75815	1.83637
308.26	22.0979	21.3975	13.1028	12.778	6.44124	6.46147	3.373	3.43678	2.13744	2.18582	1.74174	1.83637
309.26	22.1388	21.4395	13.1359	12.8017	6.44406	6.46942	3.37207	3.43684	2.16087	2.18585	1.75064	1.83638
310.26	22.1821	21.4815	13.1536	12.8254	6.46359	6.47737	3.37488	3.43689	2.19104	2.18587	1.74174	1.83638
311.26	22.224	21.5233	13.1731	12.8491	6.46359	6.48531	3.38191	3.43695	2.20166	2.18589	1.7269	1.83639
312.26	22.263	21.5651	13.2094	12.8728	6.47249	6.49326	3.38972	3.437	2.2065	2.18592	1.73581	1.83639
313.26	22.3079	21.6069	13.2317	12.8964	6.48421	6.50119	3.37207	3.43706	2.19853	2.18594	1.71909	1.8364
314.26	22.3557	21.6486	13.2513	12.9201	6.50656	6.50913	3.38191	3.43711	2.20354	2.18597	1.71017	1.8364
315.26	22.3771	21.6902	13.2766	12.9437	6.53203	6.51706	3.37488	3.43717	2.19572	2.18599	1.70737	1.8364
316.26	22.4083	21.7318	13.2961	12.9673	6.5428	6.52498	3.36128	3.43722	2.17525	2.18602	1.728	1.83641
317.26	22.4415	21.7733	13.3067	12.9909	6.54562	6.5329	3.35254	3.43728	2.15666	2.18604	1.71909	1.83641
318.26	22.4787	21.8148	13.3156	13.0145	6.55344	6.54082	3.34956	3.43733	2.15088	2.18606	1.72221	1.83642
319.26	22.5099	21.8562	13.3302	13.038	6.5475	6.54874	3.36035	3.43738	2.15276	2.18609	1.72925	1.83642
320.26	22.5518	21.8975	13.3497	13.0616	6.55344	6.55665	3.37207	3.43744	2.16165	2.18611	1.73111	1.83643
321.26	22.5891	21.9388	13.3664	13.0851	6.54453	6.56456	3.373	3.43749	2.15073	2.18614	1.71909	1.83643
322.26	22.6193	21.98	13.3809	13.1086	6.55531	6.57247	3.36316	3.43755	2.15666	2.18616	1.68784	1.83643
323.26	22.6565	22.0212	13.3798	13.1321	6.56516	6.58037	3.36426	3.4376	2.15088	2.18619	1.67424	1.83644
324.26	22.6985	22.0623	13.4083	13.1556	6.57297	6.58826	3.36238	3.43766	2.1479	2.18621	1.66237	1.83644
325.26	22.7346	22.1033	13.4356	13.179	6.60139	6.59616	3.36441	3.43771	2.13713	2.18623	1.64877	1.83645
326.26	22.7766	22.1443	13.4698	13.2025	6.61311	6.60405	3.36143	3.43777	2.12541	2.18626	1.63205	1.83645
327.26	22.8185	22.1853	13.4981	13.2259	6.61906	6.61194	3.35066	3.43782	2.14603	2.18628	1.62065	1.83646
328.26	22.8615	22.2261	13.5294	13.2493	6.63078	6.61982	3.37019	3.43788	2.15479	2.18631	1.62065	1.83646
329.26	22.8888	22.2669	13.5773	13.2727	6.65218	6.6277	3.36707	3.43793	2.16165	2.18633	1.63533	1.83646
330.26	22.926	22.3077	13.6056	13.2961	6.66093	6.63558	3.34363	3.43798	2.15556	2.18636	1.63518	1.83647
331.26	22.9563	22.3484	13.627	13.3194	6.66577	6.64345	3.33582	3.43804	2.15572	2.18638	1.63815	1.83647
332.26	22.9876	22.389	13.6359	13.3428	6.67734	6.65132	3.35066	3.43809	2.15479	2.1864	1.62924	1.83648
333.26	23.0247	22.4296	13.6466	13.3661	6.68813	6.65919	3.37019	3.43815	2.12729	2.18643	1.63986	1.83648
334.26	23.056	22.4701	13.6583	13.3894	6.7	6.66705	3.37801	3.4382	2.1176	2.18645	1.63393	1.83649
335.26	23.1029	22.5106	13.6719	13.4127	6.71187	6.67491	3.3869	3.43826	2.10588	2.18648	1.62814	1.83649
336.26	23.1458	22.551	13.6837	13.436	6.74016	6.68276	3.41034	3.43831	2.1012	2.1865	1.6194	1.83649
337.26	23.1779	22.5913	13.7062	13.4593	6.77452	6.69061	3.40144	3.43836	2.10306	2.18653	1.63518	1.8365
338.26	23.2091	22.6316	13.7239	13.4825	6.7928	6.69846	3.40034	3.43842	2.08635	2.18655	1.64597	1.8365
339.26	23.2344	22.6719	13.7601	13.5058	6.79875	6.70631	3.3916	3.43847	2.08635	2.18657	1.6519	1.83651
340.26	23.251	22.712	13.8109	13.529	6.81233	6.71415	3.38972	3.43853	2.07181	2.1866	1.66362	1.83651
341.26	23.2794	22.7521	13.8528	13.5522	6.81516	6.72199	3.39253	3.43858	2.07884	2.18662	1.67722	1.83652
342.26	23.3096	22.7922	13.8742	13.5754	6.80031	6.72982	3.3916	3.43863	2.09229	2.18665	1.68909	1.83652
343.26	23.3399	22.8322	13.8976	13.5985	6.7975	6.73765	3.39754	3.43869	2.09134	2.18667	1.69675	1.83652
344.26	23.381	22.8722	13.9259	13.6217	6.81516	6.74548	3.40332	3.43874	2.09416	2.1867	1.68784	1.83653
345.26	23.4466	22.912	13.9562	13.6448	6.81516	6.7533	3.40613	3.4388	2.08353	2.18672	1.69675	1.83653
346.26	23.4993	22.9519	13.9591	13.6679	6.81984	6.76112	3.40034	3.43885	2.08635	2.18674	1.68596	1.83654
347.26	23.5205	22.9916	13.9758	13.691	6.81516	6.76894	3.40332	3.43891	2.08823	2.18677	1.67612	1.83654
348.26	23.5579	23.0314	13.9962	13.7141	6.82405	6.77675	3.41206	3.43896	2.07744	2.18679	1.65065	1.83655
349.26	23.5862	23.071	14.0148	13.7372	6.83281	6.78456	3.41113	3.43901	2.08948	2.18682	1.64096	1.83655
350.26	23.6193	23.1106	14.0461	13.7603	6.82875	6.79237	3.40926	3.43907	2.10306	2.18684	1.62143	1.83655
351.26	23.6477	23.1502	14.0833	13.7833	6.84062	6.80017	3.42097	3.43912	2.12073	2.18686	1.61284	1.83656
352.26	23.6771	23.1897	14.1164	13.8063	6.85139	6.80797	3.41815	3.43918	2.13431	2.18689	1.63049	1.83656
353.26	23.7072	23.2291	14.122	13.8293	6.85139	6.81577	3.42097	3.43923	2.12228	2.18691	1.62955	1.83657
354.26	23.7376	23.2685	14.1359	13.8523	6.86906	6.82356	3.40926	3.43928	2.10588	2.18694	1.64127	1.83657
355.26	23.7836	23.3078	14.1583	13.8753	6.88264	6.83135	3.42879	3.43934	2.10588	2.18696	1.64409	1.83658
356.26	23.8208	23.3471	14.1466	13.8983	6.90031	6.83913	3.42879	3.43939	2.09995	2.18698	1.63518	1.83658
357.26	23.8557	23.3863	14.1466	13.9212	6.92171	6.84691	3.4366	3.43945	2.08916	2.18701	1.61752	1.83658
358.26	23.8919	23.4254	14.1644	13.9441	6.92453	6.85469	3.44238	3.4395	2.08353	2.18703	1.6069	1.83659
359.26	23.9162	23.4645	14.1986	13.9671	6.93938	6.86247	3.43347	3.43955	2.09056	2.18706	1.61284	1.83659
360.26	23.9357	23.5036	14.2406	13.99	6.93813	6.87024	3.43347	3.43961	2.09229	2.18708	1.62065	1.8366
361.26	23.9591	23.5425	14.2766	14.0128	6.93625	6.87801	3.42566	3.43966	2.09134	2.18711	1.62643	1.8366
362.26	23.9787	23.5815	14.3078	14.0357	6.92453	6.88577	3.42566	3.43971	2.09416	2.18713	1.62346	1.83661
363.26	23.9982	23.6204	14.3255	14.0586	6.905	6.89353	3.41394	3.43977	2.09134	2.18715	1.62643	1.83661
364.26	24.0266	23.6592	14.3528	14.0814	6.91985	6.90129	3.40926	3.43982	2.10306	2.18718	1.63518	1.83661
365.26	24.0727	23.6979	14.3497	14.1042	6.92171	6.90904	3.42285	3.43988	2.12073	2.1872	1.62643	1.83662
366.26	24.1263	23.7366	14.3695	14.127	6.94827	6.91679	3.40144	3.43993	2.13245	2.18723	1.63237	1.83662
367.26	24.1849	23.7753	14.3919	14.1498	6.97063	6.92454	3.40144	3.43998	2.11478	2.18725	1.64409	1.83663
368.26	24.2329	23.8139	14.4172	14.1726	6.99016	6.93228	3.41034	3.44004	2.12073	2.18727	1.6519	1.83663
369.26	24.258	23.8524	14.4367	14.1953	7.01437	6.94002	3.40926	3.44009	2.12259	2.1873	1.64597	1.83664
370.26	24.2943	23.8909	14.465	14.2181	7.03108	6.94776	3.40926	3.44014	2.1176	2.18732	1.64409	1.83664
371.26	24.3157	23.9294	14.4864	14.2408	7.04562	6.95549	3.39862	3.4402	2.10275	2.18735	1.63815	1.83664
372.26	24.3529	23.9677	14.5177	14.2635	7.04562	6.96322	3.40144	3.44025	2.08635	2.18737	1.62737	1.83665
373.26	24.3665	24.0061	14.5344	14.2862	7.05656	6.97095	3.40144	3.44031	2.09416	2.18739	1.6069	1.83665
374.26	24.3752	24.0443	14.5567	14.3089	7.07593	6.97867	3.38081	3.44036	2.09416	2.18742	1.61284	1.83666
375.26	24.4037	24.0825	14.5773	14.3315	7.09062	6.98639	3.37518	3.44041	2.08635	2.18744	1.63237	1.83666
376.26	24.4427	24.1207	14.5997	14.3542	7.08656	6.9941	3.37909	3.44047	2.08353	2.18747	1.64409	1.83667
377.26	24.474	24.1588	14.6145	14.3768	7.09531	7.00182	3.38081	3.44052	2.08353	2.18749	1.6519	1.83667
378.26	24.5102	24.1968	14.6253	14.3994	7.10297	7.00952	3.36894	3.44057	2.06682	2.18751	1.65659	1.83667
379.26	24.5383	24.2348	14.6458	14.422	7.10703	7.01723	3.34175	3.44063	2.05322	2.18754	1.65659	1.83668
380.26	24.5833	24.2728	14.6742	14.4446	7.10422	7.02493	3.33191	3.44068	2.03462	2.18756	1.6655	1.83668
381.26	24.6341	24.3107	14.6997	14.4672	7.10609	7.03263	3.31816	3.44073	2.02776	2.18759	1.67424	1.83669
382.26	24.6477	24.3485	14.7239	14.4897	7.12093	7.04032	3.31628	3.44079	2.01604	2.18761	1.67722	1.83669
383.26	24.6682	24.3863	14.7453	14.5122	7.13968	7.04801	3.3116	3.44084	2.01135	2.18763	1.66252	1.83669
384.26	24.6896	24.424	14.7687	14.5348	7.15031	7.0557	3.31941	3.44089	2.01321	2.18766	1.67439	1.8367
385.26	24.7091	24.4617	14.7794	14.5573	7.17874	7.06339	3.33113	3.44095	2.03088	2.18768	1.66049	1.8367
386.26	24.7357	24.4993	14.7989	14.5798	7.18047	7.07107	3.32831	3.441	2.03275	2.18771	1.64877	1.83671
387.26	24.7836	24.5369	14.8302	14.6022	7.20609	7.07875	3.34488	3.44105	2.05322	2.18773	1.62737	1.83671
388.26	24.8255	24.5744	14.8497	14.6247	7.22844	7.08642	3.35565	3.44111	2.06119	2.18775	1.6058	1.83672
389.26	24.8724	24.6118	14.8781	14.6471	7.25374	7.09409	3.3869	3.44116	2.07275	2.18778	1.61752	1.83672
390.26	24.9154	24.6492	14.9083	14.6696	7.26437	7.10176	3.38081	3.44121	2.0551	2.1878	1.6058	1.83672
391.26	24.9544	24.6866	14.9278	14.692	7.25844	7.10942	3.40643	3.44127	2.064	2.18782	1.62955	1.83673
392.26	24.9787	24.7239	14.9473	14.7144	7.24765	7.11708	3.40926	3.44132	2.07463	2.18785	1.65298	1.83673
393.26	25.0071	24.7611	14.9758	14.7367	7.23	7.12474	3.41113	3.44137	2.05698	2.18787	1.66362	1.83674
394.26	25.0412	24.7983	15.0052	14.7591	7.21547	7.13239	3.40613	3.44143	2.03838	2.1879	1.66362	1.83674
395.26	25.049	24.8354	15.0325	14.7815	7.2	7.14004	3.40926	3.44148	2.03275	2.18792	1.65002	1.83675
396.26	25.0666	24.8725	15.0773	14.8038	7.21187	7.14769	3.42097	3.44153	2.02385	2.18794	1.64127	1.83675
397.26	25.0969	24.9095	15.1028	14.8261	7.22656	7.15533	3.41206	3.44159	2.01321	2.18797	1.62065	1.83675
398.26	25.1193	24.9465	15.1223	14.8484	7.25406	7.16297	3.41222	3.44164	2.01025	2.18799	1.58627	1.83676
399.26	25.131	24.9834	15.1437	14.8707	7.2803	7.17061	3.41519	3.44169	2.01321	2.18802	1.56784	1.83676
400.26	25.1477	25.0203	15.1672	14.893	7.28984	7.17824	3.42596	3.44175	2.01321	2.18804	1.55893	1.83677
401.26	25.176	25.0571	15.1927	14.9152	7.32124	7.18587	3.42879	3.4418	2.01604	2.18806	1.55002	1.83677
402.26	25.1896	25.0939	15.1973	14.9375	7.34172	7.19349	3.42097	3.44185	2.0054	2.18809	1.54721	1.83678
403.26	25.2258	25.1306	15.2122	14.9597	7.33749	7.20112	3.42879	3.44191	1.97697	2.18811	1.54721	1.83678
404.26	25.2701	25.1673	15.2258	14.9819	7.3425	7.20874	3.43768	3.44196	1.96057	2.18813	1.55893	1.83678
405.26	25.3208	25.2039	15.2258	15.0041	7.33968	7.21635	3.44051	3.44201	1.95775	2.18816	1.55299	1.83679
406.26	25.3735	25.2404	15.2286	15.0263	7.33344	7.22396	3.43457	3.44206	1.96057	2.18818	1.55705	1.83679
407.26	25.4302	25.2769	15.2286	15.0484	7.31203	7.23157	3.41988	3.44212	1.97415	2.18821	1.55612	1.8368
408.26	25.474	25.3134	15.2434	15.0706	7.31203	7.23918	3.42285	3.44217	2.00822	2.18823	1.55002	1.8368
409.26	25.5071	25.3498	15.2617	15.0927	7.31516	7.24678	3.40613	3.44222	2.01291	2.18825	1.54721	1.8368
410.26	25.5471	25.3861	15.2853	15.1148	7.33469	7.25438	3.40034	3.44228	2.02666	2.18828	1.53659	1.83681
411.26	25.5969	25.4224	15.3175	15.1369	7.33749	7.26197	3.41707	3.44233	2.02963	2.1883	1.55737	1.83681
412.26	25.6193	25.4587	15.338	15.159	7.34859	7.26957	3.43175	3.44238	2.01604	2.18833	1.57378	1.83682
413.26	25.6565	25.4949	15.3486	15.1811	7.36015	7.27715	3.42378	3.44244	1.99838	2.18835	1.56674	1.83682
414.26	25.6751	25.531	15.3516	15.2032	7.37093	7.28474	3.41707	3.44249	1.96526	2.18837	1.57378	1.83683
415.26	25.7122	25.5671	15.3603	15.2252	7.38547	7.29232	3.42596	3.44254	1.96057	2.1884	1.56784	1.83683
416.26	25.7493	25.6031	15.3742	15.2472	7.39328	7.2999	3.42097	3.44259	1.96243	2.18842	1.56487	1.83683
417.26	25.7669	25.6391	15.377	15.2692	7.39906	7.30747	3.40926	3.44265	1.96338	2.18844	1.56674	1.83684
418.26	25.8049	25.675	15.4125	15.2912	7.405	7.31504	3.41707	3.4427	1.97134	2.18847	1.58455	1.83684
419.26	25.8274	25.7109	15.4544	15.3132	7.405	7.32261	3.42596	3.44275	1.98291	2.18849	1.5844	1.83685
420.26	25.8646	25.7467	15.4786	15.3352	7.41281	7.33018	3.43768	3.44281	1.97885	2.18852	1.59331	1.83685
421.26	25.9037	25.7825	15.4953	15.3571	7.42453	7.33774	3.43159	3.44286	1.97697	2.18854	1.59518	1.83685
422.26	25.929	25.8183	15.5177	15.3791	7.43343	7.3453	3.43066	3.44291	1.97415	2.18856	1.59331	1.83686
423.26	25.9662	25.8539	15.5372	15.401	7.44124	7.35285	3.44051	3.44296	1.96338	2.18859	1.58159	1.83686
424.26	25.9946	25.8896	15.5567	15.4229	7.44218	7.3604	3.43347	3.44302	1.96243	2.18861	1.58267	1.83687
425.26	26.0169	25.9251	15.5773	15.4448	7.46968	7.36795	3.42566	3.44307	1.96947	2.18863	1.57378	1.83687
426.26	26.0471	25.9607	15.5911	15.4667	7.49297	7.37549	3.44051	3.44312	1.96057	2.18866	1.55893	1.83688
427.26	26.049	25.9961	15.6242	15.4885	7.50374	7.38303	3.44238	3.44317	1.95462	2.18868	1.54721	1.83688
428.26	26.0657	26.0315	15.6476	15.5104	7.52327	7.39057	3.44051	3.44323	1.95744	2.1887	1.5394	1.83688
429.26	26.0862	26.0669	15.6583	15.5322	7.52922	7.3981	3.44051	3.44328	1.96526	2.18873	1.55002	1.83689
430.26	26.1165	26.1022	15.6759	15.554	7.54094	7.40563	3.42879	3.44333	1.96634	2.18875	1.54721	1.83689
431.26	26.1537	26.1375	15.7062	15.5758	7.55765	7.41316	3.43768	3.44339	1.97697	2.18878	1.55893	1.8369
432.26	26.1938	26.1727	15.7305	15.5976	7.57405	7.42069	3.43269	3.44344	1.97588	2.1888	1.56206	1.8369
433.26	26.2594	26.2079	15.7314	15.6193	7.59641	7.42821	3.42097	3.44349	1.98196	2.18882	1.57095	1.83691
434.26	26.3091	26.243	15.7305	15.6411	7.61594	7.43572	3.4241	3.44354	1.94572	2.18885	1.57565	1.83691
435.26	26.351	26.2781	15.7552	15.6628	7.62656	7.44324	3.40926	3.4436	1.92807	2.18887	1.56487	1.83691
436.26	26.3813	26.3131	15.7883	15.6846	7.64516	7.45075	3.39754	3.44365	1.90666	2.18889	1.56784	1.83692
437.26	26.4126	26.3481	15.8059	15.7063	7.64796	7.45825	3.38972	3.4437	1.87541	2.18892	1.5394	1.83692
438.26	26.4526	26.383	15.8216	15.728	7.66985	7.46576	3.37207	3.44375	1.85901	2.18894	1.51987	1.83693
439.26	26.468	26.4179	15.85	15.7496	7.67171	7.47326	3.37801	3.44381	1.87073	2.18896	1.51096	1.83693
440.26	26.4935	26.4527	15.8919	15.7713	7.67453	7.48075	3.38972	3.44386	1.90103	2.18899	1.48862	1.83693
441.26	26.5326	26.4875	15.9172	15.793	7.69124	7.48825	3.3916	3.44391	1.92151	2.18901	1.46909	1.83694
442.26	26.5462	26.5222	15.9367	15.8146	7.68625	7.49574	3.39081	3.44396	1.92932	2.18904	1.46628	1.83694
443.26	26.5638	26.5569	15.9572	15.8362	7.7	7.50322	3.39676	3.44402	1.93401	2.18906	1.49565	1.83695
444.26	26.6029	26.5915	15.9875	15.8578	7.69594	7.51071	3.39566	3.44407	1.92619	2.18908	1.52408	1.83695
445.26	26.6341	26.626	16.013	15.8794	7.68813	7.51819	3.3869	3.44412	1.90384	2.18911	1.52893	1.83696
446.26	26.6477	26.6606	16.0255	15.901	7.68047	7.52566	3.3869	3.44417	1.89026	2.18913	1.55142	1.83696
447.26	26.6732	26.695	16.0461	15.9225	7.69124	7.53314	3.39676	3.44422	1.87729	2.18915	1.57378	1.83696
448.26	26.7133	26.7295	16.0567	15.9441	7.68938	7.54061	3.38972	3.44428	1.85588	2.18918	1.56784	1.83697
449.26	26.7208	26.7638	16.0567	15.9656	7.70609	7.54807	3.38379	3.44433	1.8512	2.1892	1.54533	1.83697
450.26	26.7357	26.7982	16.0833	15.9871	7.72249	7.55554	3.38972	3.44438	1.84995	2.18922	1.52768	1.83698
451.26	26.7669	26.8324	16.0909	16.0086	7.72063	7.563	3.39253	3.44443	1.84229	2.18925	1.52299	1.83698
452.26	26.7943	26.8667	16.1028	16.0301	7.74016	7.57045	3.39268	3.44449	1.85493	2.18927	1.50534	1.83698
453.26	26.8244	26.9008	16.1145	16.0516	7.75969	7.57791	3.39566	3.44454	1.86182	2.18929	1.50346	1.83699
454.26	26.8441	26.935	16.1536	16.073	7.78108	7.58536	3.40643	3.44459	1.87073	2.18932	1.51408	1.83699
455.26	26.8763	26.9691	16.1839	16.0944	7.7928	7.5928	3.40926	3.44464	1.89322	2.18934	1.50534	1.837
456.26	26.9037	27.0031	16.2091	16.1159	7.79984	7.60025	3.39862	3.4447	1.89307	2.18936	1.50534	1.837
457.26	26.9349	27.0371	16.2356	16.1373	7.81328	7.60769	3.40144	3.44475	1.90384	2.18939	1.50627	1.83701
458.26	26.9368	27.071	16.257	16.1587	7.81233	7.61512	3.40738	3.4448	1.90979	2.18941	1.49643	1.83701
459.26	26.9604	27.1049	16.2853	16.1801	7.81233	7.62255	3.41222	3.44485	1.91165	2.18944	1.49753	1.83701
460.26	26.9818	27.1387	16.2961	16.2014	7.81328	7.62998	3.40926	3.4449	1.91447	2.18946	1.50346	1.83702
461.26	27.013	27.1725	16.3216	16.2228	7.81233	7.63741	3.40034	3.44496	1.91447	2.18948	1.51518	1.83702
462.26	27.0266	27.2063	16.3351	16.2441	7.81516	7.64483	3.39754	3.44501	1.89682	2.18951	1.52299	1.83703
463.26	27.0501	27.2399	16.3333	16.2654	7.82297	7.65225	3.3916	3.44506	1.87822	2.18953	1.52299	1.83703
464.26	27.0783	27.2736	16.3664	16.2867	7.83186	7.65967	3.38379	3.44511	1.87541	2.18955	1.52299	1.83703
465.26	27.0821	27.3072	16.3887	16.308	7.8553	7.66708	3.36128	3.44516	1.87837	2.18958	1.5397	1.83704
466.26	27.0979	27.3407	16.4055	16.3293	7.86015	7.67449	3.35847	3.44522	1.89026	2.1896	1.54253	1.83704
467.26	27.1282	27.3742	16.4427	16.3506	7.88264	7.6819	3.35847	3.44527	1.89026	2.18962	1.54831	1.83705
468.26	27.1713	27.4077	16.4817	16.3718	7.91389	7.6893	3.35847	3.44532	1.89212	2.18965	1.54253	1.83705
469.26	27.2122	27.4411	16.5266	16.393	7.91093	7.6967	3.34972	3.44537	1.89026	2.18967	1.54253	1.83706
470.26	27.2543	27.4744	16.552	16.4143	7.91389	7.7041	3.34175	3.44542	1.87854	2.18969	1.54533	1.83706
471.26	27.2943	27.5078	16.5773	16.4355	7.91985	7.71149	3.32722	3.44548	1.87854	2.18972	1.52487	1.83706
472.26	27.3255	27.541	16.595	16.4566	7.93234	7.71888	3.31348	3.44553	1.87259	2.18974	1.52299	1.83707
473.26	27.3557	27.5742	16.6164	16.4778	7.92171	7.72627	3.29988	3.44558	1.87073	2.18976	1.51128	1.83707
474.26	27.386	27.6074	16.6252	16.499	7.93343	7.73365	3.3116	3.44563	1.86087	2.18979	1.51706	1.83708
475.26	27.4037	27.6405	16.6302	16.5201	7.94218	7.74103	3.30769	3.44568	1.86478	2.18981	1.51408	1.83708
476.26	27.4427	27.6736	16.6745	16.5412	7.93813	7.74841	3.31659	3.44574	1.85588	2.18983	1.50534	1.83708
477.26	27.4563	27.7066	16.7211	16.5624	7.94406	7.75578	3.34909	3.44579	1.85588	2.18986	1.51706	1.83709
478.26	27.4935	27.7396	16.763	16.5835	7.94124	7.76315	3.35565	3.44584	1.86369	2.18988	1.52299	1.83709
479.26	27.513	27.7725	16.7734	16.6045	7.96172	7.77052	3.34784	3.44589	1.86369	2.1899	1.51408	1.8371
480.26	27.5443	27.8054	16.7794	16.6256	7.9814	7.77788	3.34285	3.44594	1.86478	2.18993	1.50534	1.8371
481.26	27.5638	27.8382	16.7822	16.6467	7.99609	7.78524	3.33113	3.44599	1.87073	2.18995	1.52299	1.8371
482.26	27.604	27.871	16.7961	16.6677	8.0264	7.7926	3.33113	3.44605	1.86478	2.18997	1.51408	1.83711
483.26	27.6458	27.9038	16.8273	16.6887	8.04875	7.79995	3.34784	3.4461	1.85901	2.19	1.51424	1.83711
484.26	27.6732	27.9365	16.845	16.7098	8.05061	7.8073	3.3566	3.44615	1.83948	2.19002	1.50627	1.83712
485.26	27.6985	27.9691	16.8575	16.7308	8.0428	7.81465	3.35847	3.4462	1.82463	2.19004	1.49753	1.83712
486.26	27.7072	28.0017	16.877	16.7517	8.06516	7.82199	3.36143	3.44625	1.81587	2.19007	1.47971	1.83713
487.26	27.7376	28.0343	16.8906	16.7727	8.07297	7.82933	3.36238	3.4463	1.81494	2.19009	1.45737	1.83713
488.26	27.763	28.0668	16.8994	16.7937	8.08469	7.83667	3.36551	3.44636	1.82463	2.19011	1.43784	1.83713
489.26	27.7766	28.0992	16.9055	16.8146	8.10422	7.844	3.34175	3.44641	1.80698	2.19014	1.43503	1.83714
490.26	27.8177	28.1316	16.9289	16.8355	8.12375	7.85133	3.34784	3.44646	1.81682	2.19016	1.43315	1.83714
491.26	27.8557	28.164	16.9427	16.8564	8.12671	7.85866	3.35379	3.44651	1.81682	2.19018	1.43909	1.83715
492.26	27.8977	28.1963	16.9544	16.8773	8.1414	7.86598	3.3705	3.44656	1.81291	2.19021	1.45877	1.83715
493.26	27.9083	28.2286	16.968	16.8982	8.14046	7.8733	3.37909	3.44661	1.814	2.19023	1.47925	1.83715
494.26	27.9396	28.2608	16.9845	16.9191	8.15218	7.88062	3.38222	3.44667	1.814	2.19025	1.47221	1.83716
495.26	27.9651	28.293	17.0159	16.9399	8.16203	7.88793	3.39676	3.44672	1.81807	2.19028	1.49174	1.83716
496.26	27.9758	28.3252	17.0177	16.9608	8.17874	7.89524	3.39285	3.44677	1.814	2.1903	1.48581	1.83717
497.26	28.013	28.3573	17.0442	16.9816	8.17453	7.90255	3.37909	3.44682	1.80931	2.19032	1.48674	1.83717
498.26	28.0326	28.3893	17.0567	17.0024	8.19046	7.90985	3.3566	3.44687	1.81213	2.19035	1.49174	1.83718
499.26	28.0638	28.4213	17.0773	17.0232	8.20421	7.91715	3.33612	3.44692	1.8051	2.19037	1.48892	1.83718
500.26	28.0922	28.4533	17.0939	17.044	8.22063	7.92445	3.33894	3.44697	1.814	2.19039	1.50064	1.83718
501.26	28.1263	28.4852	17.1047	17.0647	8.23734	7.93175	3.32831	3.44703	1.82463	2.19042	1.51831	1.83719
502.26	28.1594	28.517	17.1341	17.0855	8.25374	7.93904	3.30769	3.44708	1.81995	2.19044	1.51236	1.83719
503.26	28.1682	28.5488	17.1555	17.1062	8.25969	7.94632	3.31473	3.44713	1.83353	2.19046	1.52299	1.8372
504.26	28.1868	28.5806	17.1867	17.127	8.25656	7.95361	3.32831	3.44718	1.83353	2.19049	1.51408	1.8372
505.26	28.1877	28.6123	17.1973	17.1477	8.23891	7.96089	3.35487	3.44723	1.83167	2.19051	1.49643	1.8372
506.26	28.2063	28.644	17.2001	17.1684	8.23125	7.96817	3.35487	3.44728	1.81995	2.19053	1.48581	1.83721
507.26	28.2435	28.6757	17.2258	17.189	8.22844	7.97544	3.37144	3.44733	1.814	2.19056	1.4733	1.83721
508.26	28.2688	28.7072	17.2481	17.2097	8.2303	7.98271	3.37518	3.44738	1.81104	2.19058	1.45549	1.83722
509.26	28.2971	28.7388	17.2559	17.2304	8.23421	7.98998	3.37909	3.44744	1.80228	2.1906	1.44096	1.83722
510.26	28.3274	28.7703	17.2844	17.251	8.24016	7.99725	3.3744	3.44749	1.80823	2.19063	1.44986	1.83722
511.26	28.3646	28.8018	17.302	17.2716	8.26859	8.00451	3.38316	3.44754	1.81119	2.19065	1.448	1.83723
512.26	28.4037	28.8332	17.3245	17.2922	8.26718	8.01176	3.40753	3.44759	1.81104	2.19067	1.44096	1.83723
513.26	28.4349	28.8645	17.3676	17.3128	8.25562	8.01902	3.40457	3.44764	1.81119	2.19069	1.44096	1.83724
514.26	28.4485	28.8958	17.4008	17.3334	8.27141	8.02627	3.4241	3.44769	1.81213	2.19072	1.44392	1.83724
515.26	28.4651	28.9271	17.4497	17.354	8.27031	8.03352	3.40926	3.44774	1.81104	2.19074	1.45268	1.83725
516.26	28.4758	28.9584	17.4966	17.3745	8.25562	8.04076	3.40926	3.44779	1.80806	2.19076	1.45268	1.83725
517.26	28.4963	28.9895	17.5148	17.395	8.2625	8.04801	3.38269	3.44785	1.81682	2.19079	1.4644	1.83725
518.26	28.513	29.0207	17.5177	17.4156	8.28531	8.05525	3.36737	3.4479	1.8051	2.19081	1.48393	1.83726
519.26	28.5532	29.0518	17.5117	17.4361	8.32219	8.06248	3.36426	3.44795	1.80618	2.19083	1.50064	1.83726
520.26	28.6099	29.0828	17.5009	17.4566	8.34953	8.06971	3.3566	3.448	1.78369	2.19086	1.50346	1.83727
521.26	28.6626	29.1138	17.4864	17.4771	8.37093	8.07694	3.33894	3.44805	1.77493	2.19088	1.51518	1.83727
522.26	28.7044	29.1448	17.4758	17.4975	8.40031	8.08417	3.33612	3.4481	1.73479	2.1909	1.52299	1.83727
523.26	28.7298	29.1757	17.4875	17.518	8.40813	8.09139	3.31659	3.44815	1.71526	2.19093	1.51706	1.83728
524.26	28.7404	29.2066	17.513	17.5384	8.40813	8.09861	3.31473	3.4482	1.70462	2.19095	1.50627	1.83728
525.26	28.7463	29.2374	17.5609	17.5588	8.41109	8.10582	3.31784	3.44825	1.72119	2.19097	1.49643	1.83729
526.26	28.7287	29.2682	17.595	17.5792	8.40343	8.11304	3.34315	3.44831	1.72603	2.191	1.48581	1.83729
527.26	28.7435	29.299	17.6281	17.5996	8.43187	8.12025	3.35379	3.44836	1.72697	2.19102	1.47502	1.83729
528.26	28.7719	29.3297	17.6625	17.62	8.44827	8.12745	3.3716	3.44841	1.74072	2.19104	1.48581	1.8373
529.26	28.7943	29.3603	17.6848	17.6404	8.45	8.13466	3.38504	3.44846	1.7515	2.19106	1.49174	1.8373
530.26	28.8169	29.3909	17.6997	17.6607	8.45483	8.14185	3.38504	3.44851	1.76604	2.19109	1.48581	1.83731
531.26	28.8422	29.4215	17.7211	17.6811	8.45578	8.14905	3.3869	3.44856	1.7601	2.19111	1.48393	1.83731
532.26	28.8724	29.452	17.7317	17.7014	8.46359	8.15624	3.38504	3.44861	1.76135	2.19113	1.47502	1.83731
533.26	28.8919	29.4825	17.7481	17.7217	8.45468	8.16343	3.3869	3.44866	1.75432	2.19116	1.46939	1.83732
534.26	28.8977	29.5129	17.7559	17.742	8.4353	8.17062	3.39394	3.44871	1.74838	2.19118	1.44675	1.83732
535.26	28.9154	29.5433	17.7784	17.7623	8.43047	8.1778	3.38785	3.44876	1.73479	2.1912	1.43127	1.83733
536.26	28.9232	29.5737	17.7989	17.7826	8.42453	8.18498	3.3869	3.44881	1.74072	2.19123	1.4155	1.83733
537.26	28.9516	29.604	17.8166	17.8028	8.42171	8.19216	3.36737	3.44887	1.73196	2.19125	1.42534	1.83734
538.26	28.974	29.6342	17.8558	17.823	8.41985	8.19934	3.3566	3.44892	1.74368	2.19127	1.43315	1.83734
539.26	29.0024	29.6645	17.8705	17.8433	8.43655	8.20651	3.34784	3.44897	1.74182	2.19129	1.43315	1.83734
540.26	29.0396	29.6946	17.8891	17.8635	8.4678	8.21367	3.33894	3.44902	1.74963	2.19132	1.44205	1.83735
541.26	29.0619	29.7248	17.9203	17.8837	8.47844	8.22084	3.33612	3.44907	1.73306	2.19134	1.45862	1.83735
542.26	29.0941	29.7549	17.9309	17.9039	8.49016	8.228	3.35379	3.44912	1.72229	2.19136	1.46939	1.83736
543.26	29.1057	29.7849	17.9516	17.924	8.49202	8.23516	3.35956	3.44917	1.72119	2.19139	1.46939	1.83736
544.26	29.1193	29.8149	17.9711	17.9442	8.50374	8.24231	3.3566	3.44922	1.72603	2.19141	1.4644	1.83736
545.26	29.136	29.8449	17.9591	17.9643	8.5125	8.24946	3.36269	3.44927	1.72119	2.19143	1.4733	1.83737
546.26	29.1622	29.8748	17.9817	17.9845	8.52046	8.25661	3.3616	3.44932	1.72415	2.19146	1.47612	1.83737
547.26	29.1955	29.9047	17.9981	18.0046	8.54094	8.26375	3.35675	3.44937	1.72415	2.19148	1.47221	1.83738
548.26	29.2376	29.9345	18.007	18.0247	8.5428	8.2709	3.36081	3.44942	1.72697	2.1915	1.45549	1.83738
549.26	29.2719	29.9643	18.0098	18.0448	8.56328	8.27803	3.36269	3.44947	1.72119	2.19152	1.46158	1.83738
550.26	29.3268	29.994	18.0266	18.0648	8.55656	8.28517	3.3744	3.44952	1.71243	2.19155	1.45847	1.83739
551.26	29.3618	30.0237	18.0638	18.0849	8.57124	8.2923	3.37613	3.44957	1.71057	2.19157	1.43002	1.83739
552.26	29.3873	30.0534	18.0851	18.1049	8.56828	8.29943	3.36737	3.44963	1.70462	2.19159	1.40471	1.8374
553.26	29.4321	30.083	18.1056	18.125	8.5753	8.30656	3.38504	3.44968	1.69885	2.19162	1.39597	1.8374
554.26	29.4427	30.1126	18.1164	18.145	8.57718	8.31368	3.37801	3.44973	1.69603	2.19164	1.38237	1.8374
555.26	29.4622	30.1421	18.1359	18.165	8.59671	8.3208	3.37628	3.44978	1.71057	2.19166	1.37346	1.83741
556.26	29.4758	30.1716	18.1419	18.185	8.59358	8.32791	3.37019	3.44983	1.71353	2.19169	1.36472	1.83741
557.26	29.4963	30.2011	18.1476	18.205	8.59172	8.33503	3.37613	3.44988	1.72119	2.19171	1.36862	1.83742
558.26	29.5266	30.2305	18.1536	18.2249	8.59953	8.34214	3.3869	3.44993	1.71243	2.19173	1.36565	1.83742
559.26	29.5471	30.2598	18.1614	18.2449	8.60139	8.34924	3.3869	3.44998	1.70744	2.19175	1.3569	1.83742
560.26	29.5657	30.2892	18.175	18.2648	8.59953	8.35635	3.38191	3.45003	1.69572	2.19178	1.37456	1.83743
561.26	29.5891	30.3185	18.1927	18.2847	8.60843	8.36345	3.39862	3.45008	1.68088	2.1918	1.37346	1.83743
562.26	29.6174	30.3477	18.2122	18.3046	8.63078	8.37054	3.40144	3.45013	1.65854	2.19182	1.37955	1.83744
563.26	29.636	30.3769	18.2406	18.3245	8.65813	8.37764	3.38191	3.45018	1.63713	2.19185	1.38237	1.83744
564.26	29.6622	30.406	18.257	18.3444	8.68234	8.38473	3.34956	3.45023	1.63431	2.19187	1.39127	1.83745
565.26	29.676	30.4352	18.2736	18.3643	8.70187	8.39181	3.35254	3.45028	1.62354	2.19189	1.38518	1.83745
566.26	29.6868	30.4642	18.305	18.3841	8.71547	8.3989	3.35066	3.45033	1.62259	2.19191	1.36472	1.83745
567.26	29.7044	30.4933	18.3244	18.4039	8.70766	8.40598	3.34003	3.45038	1.63556	2.19194	1.35112	1.83746
568.26	29.724	30.5223	18.3409	18.4238	8.69687	8.41306	3.35379	3.45043	1.64212	2.19196	1.3569	1.83746
569.26	29.7446	30.5512	18.3556	18.4436	8.68813	8.42013	3.39394	3.45048	1.65384	2.19198	1.34331	1.83747
570.26	29.7818	30.5801	18.3742	18.4634	8.69218	8.4272	3.39566	3.45053	1.65666	2.19201	1.34331	1.83747
571.26	29.8032	30.609	18.4125	18.4832	8.71655	8.43427	3.39471	3.45058	1.64494	2.19203	1.32268	1.83747
572.26	29.8372	30.6378	18.4427	18.5029	8.73703	8.44134	3.40457	3.45063	1.64494	2.19205	1.31502	1.83748
573.26	29.8497	30.6666	18.4739	18.5227	8.75546	8.4484	3.40643	3.45068	1.63901	2.19207	1.32378	1.83748
574.26	29.8604	30.6953	18.4817	18.5424	8.77327	8.45546	3.39754	3.45073	1.64885	2.1921	1.32378	1.83749
575.26	29.9005	30.724	18.507	18.5621	8.77609	8.46251	3.3869	3.45078	1.64775	2.19212	1.34331	1.83749
576.26	29.9083	30.7527	18.5208	18.5819	8.78391	8.46956	3.38972	3.45083	1.65384	2.19214	1.33737	1.83749
577.26	29.9368	30.7813	18.5372	18.6016	8.77219	8.47661	3.37801	3.45088	1.64775	2.19217	1.34612	1.8375
578.26	29.9455	30.8099	18.5313	18.6212	8.77327	8.48366	3.36316	3.45093	1.65854	2.19219	1.36284	1.8375
579.26	29.968	30.8384	18.5442	18.6409	8.77327	8.4907	3.33894	3.45098	1.65666	2.19221	1.36284	1.83751
580.26	29.9768	30.8669	18.5508	18.6606	8.77922	8.49774	3.33301	3.45103	1.6301	2.19223	1.36284	1.83751
581.26	29.9787	30.8954	18.5726	18.6802	8.79875	8.50478	3.33426	3.45108	1.61948	2.19226	1.35408	1.83751
582.26	30.0071	30.9238	18.6028	18.6999	8.80452	8.51181	3.33426	3.45113	1.60275	2.19228	1.36877	1.83752
583.26	30.0099	30.9522	18.6372	18.7195	8.81516	8.51884	3.33144	3.45118	1.58635	2.1923	1.37955	1.83752
584.26	30.0247	30.9805	18.675	18.7391	8.82297	8.52587	3.34315	3.45123	1.58635	2.19232	1.39127	1.83753
585.26	30.0591	31.0088	18.6984	18.7587	8.83186	8.53289	3.34003	3.45128	1.58635	2.19235	1.39409	1.83753
586.26	30.0894	31.037	18.7267	18.7782	8.83469	8.53991	3.33707	3.45133	1.59525	2.19237	1.39409	1.83753
587.26	30.1216	31.0653	18.7559	18.7978	8.83469	8.54693	3.33301	3.45138	1.61292	2.19239	1.38518	1.83754
588.26	30.149	31.0934	18.7617	18.8174	8.84953	8.55395	3.32222	3.45143	1.61478	2.19242	1.37643	1.83754
589.26	30.1654	31.1216	18.7883	18.8369	8.87796	8.56096	3.32722	3.45148	1.60588	2.19244	1.36752	1.83755
590.26	30.1849	31.1496	18.7989	18.8564	8.8886	8.56796	3.3419	3.45153	1.59807	2.19246	1.34909	1.83755
591.26	30.1985	31.1777	18.8302	18.8759	8.90813	8.57497	3.34879	3.45158	1.57744	2.19248	1.34612	1.83755
592.26	30.2013	31.2057	18.8497	18.8954	8.92171	8.58197	3.34784	3.45163	1.59134	2.19251	1.32846	1.83756
593.26	30.2091	31.2337	18.8781	18.9149	8.94124	8.58897	3.35066	3.45168	1.59416	2.19253	1.33159	1.83756
594.26	30.2268	31.2616	18.9083	18.9344	8.95578	8.59597	3.35847	3.45173	1.57651	2.19255	1.33737	1.83757
595.26	30.256	31.2895	18.9306	18.9538	8.9664	8.60296	3.35847	3.45178	1.58948	2.19257	1.34331	1.83757
596.26	30.2962	31.3174	18.9445	18.9733	8.96547	8.60995	3.37019	3.45183	1.60588	2.1926	1.35503	1.83757
597.26	30.3451	31.3452	18.9473	18.9927	9.00374	8.61693	3.4005	3.45188	1.61478	2.19262	1.36862	1.83758
598.26	30.3919	31.3729	18.9297	19.0121	8.99953	8.62392	3.39676	3.45193	1.6265	2.19264	1.36284	1.83758
599.26	30.2944	31.4007	18.805	19.0315	8.87202	8.6309	15.2439	3.45198	1.55135	2.19266	1.2494	1.83759
600.26	40.3838	26.3011	34.3283	14.4241	34.9611	4.8046	-14.0714	0.0330012	37.2259	0.0146835	17.6566	0.00258997
601.26	12.3619	26.2957	-14.1981	14.4212	-34.1105	4.80362	-12.9295	0.0329945	-40.5147	0.0146805	-25.4243	0.00258944
602.26	27.4365	26.2903	13.6577	14.4182	3.11734	4.80264	-1.46199	0.0329877	-4.21896	0.0146775	-2.39264	0.00258891
603.26	28.2319	26.285	15.0692	14.4153	4.95358	4.80166	-0.563553	0.032981	-1.92053	0.0146745	-1.27904	0.00258838
604.26	28.2896	26.2796	15.257	14.4124	5.27031	4.80068	-0.366211	0.0329742	-1.60959	0.0146715	-1.12076	0.00258786
605.26	28.2685	26.2742	15.2772	14.4094	5.34828	4.7997	-0.311996	0.0329675	-1.62787	0.0146685	-1.05888	0.00258733
606.26	28.1974	26.2689	15.2359	14.4065	5.32672	4.79872	-0.330597	0.0329607	-1.58287	0.0146655	-1.05795	0.0025868
607.26	28.1466	26.2635	15.1825	14.4035	5.33186	4.79774	-0.327148	0.032954	-1.58865	0.0146625	-1.08122	0.00258627
608.26	28.1122	26.2581	15.163	14.4006	5.33156	4.79676	-0.333252	0.0329472	-1.57506	0.0146595	-1.11139	0.00258574
609.26	28.0849	26.2528	15.1512	14.3977	5.33046	4.79578	-0.354034	0.0329405	-1.58397	0.0146565	-1.15654	0.00258521
610.26	28.0505	26.2474	15.163	14.3947	5.32921	4.7948	-0.374649	0.0329338	-1.6124	0.0146535	-1.18764	0.00258468
611.26	28.0369	26.2421	15.1509	14.3918	5.32452	4.79382	-0.39418	0.032927	-1.62411	0.0146505	-1.21794	0.00258415
612.26	28.0135	26.2367	15.1481	14.3889	5.28828	4.79285	-0.419647	0.0329203	-1.63287	0.0146475	-1.24138	0.00258362
613.26	27.9969	26.2313	15.1364	14.3859	5.25703	4.79187	-0.437927	0.0329135	-1.64865	0.0146445	-1.26685	0.00258309
614.26	27.9666	26.226	15.1048	14.383	5.22874	4.79089	-0.431839	0.0329068	-1.65428	0.0146415	-1.28825	0.00258256
615.26	27.956	26.2206	15.0766	14.3801	5.20155	4.78991	-0.423096	0.0329001	-1.66132	0.0146385	-1.27936	0.00258203
616.26	27.9158	26.2153	15.0345	14.3771	5.19562	4.78894	-0.421219	0.0328933	-1.65428	0.0146355	-1.28825	0.00258151
617.26	27.8876	26.2099	15.0192	14.3742	5.18672	4.78796	-0.4095	0.0328866	-1.6496	0.0146325	-1.29294	0.00258098
618.26	27.8632	26.2046	14.9967	14.3713	5.1839	4.78698	-0.382935	0.0328799	-1.64865	0.0146295	-1.31169	0.00258045
619.26	27.8622	26.1992	14.9958	14.3683	5.20343	4.786	-0.37825	0.0328731	-1.6524	0.0146265	-1.3028	0.00257992
620.26	27.8544	26.1939	14.9969	14.3654	5.20811	4.78503	-0.388245	0.0328664	-1.65146	0.0146235	-1.31169	0.00257939
621.26	27.8201	26.1885	15.0056	14.3625	5.21407	4.78405	-0.388092	0.0328597	-1.65146	0.0146205	-1.33122	0.00257887
622.26	27.8154	26.1832	14.9898	14.3596	5.21983	4.78307	-0.413712	0.032853	-1.66132	0.0146175	-1.33405	0.00257834
623.26	27.8182	26.1778	14.9908	14.3566	5.21094	4.7821	-0.418396	0.0328462	-1.66318	0.0146146	-1.33405	0.00257781
624.26	27.7869	26.1725	14.9731	14.3537	5.21094	4.78112	-0.416534	0.0328395	-1.67194	0.0146116	-1.34372	0.00257728
625.26	27.7497	26.1671	14.9517	14.3508	5.1964	4.78015	-0.416534	0.0328328	-1.68584	0.0146086	-1.34654	0.00257675
626.26	27.7274	26.1618	14.9176	14.3479	5.19453	4.77917	-0.424347	0.0328261	-1.68271	0.0146056	-1.34654	0.00257623
627.26	27.7119	26.1565	14.913	14.3449	5.18578	4.7782	-0.43512	0.0328194	-1.70038	0.0146026	-1.34763	0.0025757
628.26	27.6943	26.1511	14.9247	14.342	5.18202	4.77722	-0.431839	0.0328126	-1.69334	0.0145996	-1.34654	0.00257517
629.26	27.6701	26.1458	14.9189	14.3391	5.19281	4.77625	-0.415283	0.0328059	-1.68553	0.0145966	-1.34935	0.00257465
630.26	27.6435	26.1404	14.9297	14.3362	5.18515	4.77527	-0.400589	0.0327992	-1.67569	0.0145936	-1.32889	0.00257412
631.26	27.6388	26.1351	14.9591	14.3332	5.18703	4.7743	-0.391846	0.0327925	-1.67662	0.0145906	-1.32701	0.00257359
632.26	27.631	26.1298	14.9716	14.3303	5.19281	4.77332	-0.375122	0.0327858	-1.67569	0.0145877	-1.31529	0.00257307
633.26	27.6161	26.1244	14.9684	14.3274	5.19687	4.77235	-0.361526	0.0327791	-1.67068	0.0145847	-1.30748	0.00257254
634.26	27.5997	26.1191	14.9548	14.3245	5.19875	4.77137	-0.34996	0.0327724	-1.66788	0.0145817	-1.29576	0.00257201
635.26	27.5908	26.1138	14.9567	14.3216	5.19875	4.7704	-0.356842	0.0327657	-1.666	0.0145787	-1.29294	0.00257149
636.26	27.588	26.1084	14.943	14.3186	5.19281	4.76943	-0.364502	0.032759	-1.666	0.0145757	-1.28983	0.00257096
637.26	27.5791	26.1031	14.9186	14.3157	5.18983	4.76845	-0.373245	0.0327522	-1.63475	0.0145727	-1.28795	0.00257043
638.26	27.5763	26.0978	14.8922	14.3128	5.19281	4.76748	-0.384033	0.0327455	-1.64365	0.0145698	-1.27904	0.00256991
639.26	27.5704	26.0924	14.9052	14.3099	5.19374	4.76651	-0.395752	0.0327388	-1.63756	0.0145668	-1.27811	0.00256938
640.26	27.5713	26.0871	14.8962	14.307	5.18983	4.76553	-0.412308	0.0327321	-1.62881	0.0145638	-1.26138	0.00256886
641.26	27.5626	26.0818	14.8934	14.3041	5.19281	4.76456	-0.414185	0.0327254	-1.62584	0.0145608	-1.24779	0.00256833
642.26	27.5518	26.0765	14.9012	14.3011	5.20155	4.76359	-0.4095	0.0327187	-1.62881	0.0145578	-1.24794	0.0025678
643.26	27.5313	26.0711	14.9012	14.2982	5.21234	4.76262	-0.4095	0.032712	-1.6199	0.0145548	-1.2567	0.00256728
644.26	27.501	26.0658	14.9219	14.2953	5.18953	4.76165	-0.398865	0.0327054	-1.60631	0.0145519	-1.25951	0.00256675
645.26	27.4787	26.0605	14.8962	14.2924	5.18109	4.76067	-0.376221	0.0326987	-1.59178	0.0145489	-1.2567	0.00256623
646.26	27.4474	26.0552	14.8934	14.2895	5.175	4.7597	-0.362625	0.032692	-1.60178	0.0145459	-1.26451	0.0025657
647.26	27.4396	26.0499	14.8758	14.2866	5.17796	4.75873	-0.343094	0.0326853	-1.58678	0.0145429	-1.26747	0.00256518
648.26	27.4279	26.0445	14.8739	14.2837	5.17313	4.75776	-0.319656	0.0326786	-1.58397	0.01454	-1.24889	0.00256465
649.26	27.4201	26.0392	14.865	14.2807	5.18109	4.75679	-0.30481	0.0326719	-1.57803	0.014537	-1.23717	0.00256413
650.26	27.4024	26.0339	14.8562	14.2778	5.19093	4.75582	-0.291214	0.0326652	-1.56444	0.014534	-1.22826	0.0025636
651.26	27.3838	26.0286	14.865	14.2749	5.19562	4.75485	-0.303085	0.0326585	-1.53787	0.014531	-1.20779	0.00256308
652.26	27.3693	26.0233	14.8591	14.272	5.19875	4.75388	-0.291214	0.0326518	-1.53319	0.0145281	-1.1981	0.00256255
653.26	27.3576	26.018	14.8473	14.2691	5.21515	4.75291	-0.302002	0.0326452	-1.52725	0.0145251	-1.19528	0.00256203
654.26	27.3302	26.0126	14.8455	14.2662	5.2328	4.75194	-0.307617	0.0326385	-1.52538	0.0145221	-1.19701	0.0025615
655.26	27.3096	26.0073	14.8278	14.2633	5.23781	4.75097	-0.302002	0.0326318	-1.52538	0.0145191	-1.18045	0.00256098
656.26	27.2962	26.002	14.8083	14.2604	5.25844	4.75	-0.310745	0.0326251	-1.51944	0.0145162	-1.17747	0.00256046
657.26	27.2822	25.9967	14.7989	14.2575	5.27499	4.74903	-0.306686	0.0326184	-1.52538	0.0145132	-1.18045	0.00255993
658.26	27.2646	25.9914	14.7919	14.2546	5.26906	4.74806	-0.30481	0.0326118	-1.54491	0.0145102	-1.17154	0.00255941
659.26	27.2422	25.9861	14.7919	14.2517	5.26437	4.74709	-0.296997	0.0326051	-1.536	0.0145073	-1.16373	0.00255888
660.26	27.2197	25.9808	14.7872	14.2488	5.26906	4.74612	-0.302933	0.0325984	-1.53897	0.0145043	-1.12357	0.00255836
661.26	27.2063	25.9755	14.7919	14.2458	5.26906	4.74515	-0.30481	0.0325917	-1.54959	0.0145013	-1.11795	0.00255784
662.26	27.2013	25.9702	14.7859	14.2429	5.27094	4.74418	-0.30481	0.0325851	-1.56131	0.0144984	-1.11607	0.00255731
663.26	27.1729	25.9649	14.7751	14.24	5.26015	4.74322	-0.30481	0.0325784	-1.56912	0.0144954	-1.11607	0.00255679
664.26	27.1388	25.9596	14.7645	14.2371	5.26906	4.74225	-0.313721	0.0325717	-1.54646	0.0144924	-1.12779	0.00255627
665.26	27.1193	25.9543	14.7586	14.2342	5.26906	4.74128	-0.316528	0.0325651	-1.536	0.0144895	-1.12389	0.00255574
666.26	27.1016	25.949	14.7467	14.2313	5.25734	4.74031	-0.296997	0.0325584	-1.53787	0.0144865	-1.13857	0.00255522
667.26	27.083	25.9437	14.7262	14.2284	5.2514	4.73935	-0.291214	0.0325517	-1.53319	0.0144835	-1.13951	0.0025547
668.26	27.0685	25.9384	14.7078	14.2255	5.25233	4.73838	-0.293091	0.0325451	-1.52725	0.0144806	-1.14732	0.00255417
669.26	27.0696	25.9331	14.7059	14.2226	5.2514	4.73741	-0.279343	0.0325384	-1.52725	0.0144776	-1.14732	0.00255365
670.26	27.0862	25.9278	14.7048	14.2197	5.24062	4.73644	-0.268555	0.0325318	-1.52818	0.0144746	-1.13841	0.00255313
671.26	27.0891	25.9225	14.6883	14.2168	5.24953	4.73548	-0.265747	0.0325251	-1.53897	0.0144717	-1.12857	0.00255261
672.26	27.0685	25.9172	14.6658	14.2139	5.27187	4.73451	-0.267624	0.0325184	-1.54178	0.0144687	-1.12857	0.00255208
673.26	27.0802	25.9119	14.6523	14.211	5.27687	4.73354	-0.277466	0.0325118	-1.53287	0.0144657	-1.12857	0.00255156
674.26	27.0713	25.9066	14.6611	14.2081	5.26906	4.73258	-0.271683	0.0325051	-1.54366	0.0144628	-1.12076	0.00255104
675.26	27.0626	25.9013	14.663	14.2053	5.26625	4.73161	-0.274658	0.0324985	-1.54178	0.0144598	-1.11795	0.00255052
676.26	27.0549	25.896	14.663	14.2024	5.26906	4.73065	-0.28949	0.0324918	-1.52115	0.0144569	-1.13248	0.00254999
677.26	27.0341	25.8908	14.663	14.1995	5.24953	4.72968	-0.298248	0.0324852	-1.49568	0.0144539	-1.1356	0.00254947
678.26	27.0224	25.8855	14.6719	14.1966	5.23	4.72872	-0.294189	0.0324785	-1.49881	0.0144509	-1.14732	0.00254895
679.26	26.9893	25.8802	14.6747	14.1937	5.21828	4.72775	-0.285278	0.0324719	-1.47928	0.014448	-1.1492	0.00254843
680.26	26.9727	25.8749	14.6806	14.1908	5.21828	4.72679	-0.265747	0.0324652	-1.47459	0.014445	-1.15794	0.00254791
681.26	26.9424	25.8696	14.6708	14.1879	5.21828	4.72582	-0.249023	0.0324586	-1.45975	0.0144421	-1.16873	0.00254739
682.26	26.9247	25.8643	14.657	14.185	5.21828	4.72486	-0.243408	0.0324519	-1.45975	0.0144391	-1.16092	0.00254686
683.26	26.9083	25.8591	14.6552	14.1821	5.24672	4.72389	-0.226685	0.0324453	-1.47459	0.0144362	-1.15201	0.00254634
684.26	26.9024	25.8538	14.6541	14.1792	5.24062	4.72293	-0.23262	0.0324387	-1.45975	0.0144332	-1.13841	0.00254582
685.26	26.9033	25.8485	14.6453	14.1763	5.23781	4.72197	-0.231689	0.032432	-1.46866	0.0144303	-1.14029	0.0025453
686.26	26.9083	25.8432	14.6434	14.1734	5.24672	4.721	-0.241531	0.0324254	-1.4774	0.0144273	-1.14029	0.00254478
687.26	26.9005	25.8379	14.6434	14.1705	5.2328	4.72004	-0.246216	0.0324187	-1.48241	0.0144244	-1.1356	0.00254426
688.26	26.8888	25.8327	14.6611	14.1677	5.20155	4.71908	-0.237305	0.0324121	-1.48537	0.0144214	-1.14029	0.00254374
689.26	26.8693	25.8274	14.657	14.1648	5.18813	4.71811	-0.248093	0.0324055	-1.4774	0.0144184	-1.14732	0.00254322
690.26	26.8497	25.8221	14.6541	14.1619	5.17921	4.71715	-0.231369	0.0323988	-1.47459	0.0144155	-1.16092	0.0025427
691.26	26.8333	25.8169	14.6423	14.159	5.18813	4.71619	-0.225586	0.0323922	-1.48819	0.0144125	-1.15904	0.00254218
692.26	26.799	25.8116	14.6453	14.1561	5.18515	4.71522	-0.228561	0.0323856	-1.48521	0.0144096	-1.14139	0.00254166
693.26	26.7794	25.8063	14.6345	14.1532	5.19594	4.71426	-0.229492	0.032379	-1.496	0.0144066	-1.1442	0.00254114
694.26	26.7599	25.801	14.6258	14.1503	5.20468	4.7133	-0.220749	0.0323723	-1.5285	0.0144037	-1.13841	0.00254062
695.26	26.7493	25.7958	14.6239	14.1475	5.20656	4.71234	-0.218872	0.0323657	-1.54678	0.0144008	-1.12654	0.0025401
696.26	26.7197	25.7905	14.615	14.1446	5.19875	4.71138	-0.224808	0.0323591	-1.55553	0.0143978	-1.10403	0.00253958
697.26	26.6985	25.7852	14.6091	14.1417	5.18703	4.71041	-0.229813	0.0323525	-1.54959	0.0143949	-1.09341	0.00253906
698.26	26.6924	25.78	14.5973	14.1388	5.18109	4.70945	-0.231689	0.0323458	-1.53194	0.0143919	-1.10233	0.00253854
699.26	26.6779	25.7747	14.5689	14.1359	5.1714	4.70849	-0.241531	0.0323392	-1.51521	0.014389	-1.09935	0.00253802
700.26	26.6552	25.7695	14.5583	14.133	5.17921	4.70753	-0.241531	0.0323326	-1.4985	0.014386	-1.11014	0.0025375
701.26	26.6388	25.7642	14.5387	14.1302	5.19093	4.70657	-0.261063	0.032326	-1.47037	0.0143831	-1.11888	0.00253698
702.26	26.6104	25.7589	14.5223	14.1273	5.19875	4.70561	-0.248093	0.0323194	-1.47334	0.0143801	-1.12967	0.00253646
703.26	26.6076	25.7537	14.5177	14.1244	5.21046	4.70465	-0.246216	0.0323127	-1.47928	0.0143772	-1.13248	0.00253594
704.26	26.6048	25.7484	14.5223	14.1215	5.22218	4.70369	-0.257935	0.0323061	-1.48521	0.0143742	-1.13248	0.00253542
705.26	26.6076	25.7432	14.5195	14.1186	5.21327	4.70273	-0.249023	0.0322995	-1.47928	0.0143713	-1.1442	0.0025349
706.26	26.6087	25.7379	14.5372	14.1158	5.20453	4.70177	-0.237305	0.0322929	-1.48241	0.0143684	-1.1442	0.00253438
707.26	26.5997	25.7326	14.5489	14.1129	5.20155	4.70081	-0.234497	0.0322863	-1.47647	0.0143654	-1.1442	0.00253386
708.26	26.5919	25.7274	14.5625	14.11	5.20155	4.69985	-0.240585	0.0322797	-1.47928	0.0143625	-1.13248	0.00253335
709.26	26.5635	25.7221	14.5712	14.1071	5.17218	4.69889	-0.246216	0.0322731	-1.47147	0.0143595	-1.12669	0.00253283
710.26	26.5341	25.7169	14.5536	14.1043	5.17921	4.69793	-0.237305	0.0322665	-1.45975	0.0143566	-1.12076	0.00253231
711.26	26.5041	25.7116	14.5489	14.1014	5.20062	4.69697	-0.234497	0.0322599	-1.47459	0.0143537	-1.10123	0.00253179
712.26	26.4865	25.7064	14.543	14.0985	5.21327	4.69602	-0.243408	0.0322533	-1.46756	0.0143507	-1.09061	0.00253127
713.26	26.4876	25.7011	14.5341	14.0956	5.21234	4.69506	-0.246216	0.0322467	-1.491	0.0143478	-1.08873	0.00253075
714.26	26.4787	25.6959	14.5223	14.0928	5.22218	4.6941	-0.246216	0.0322401	-1.49413	0.0143449	-1.09061	0.00253024
715.26	26.4798	25.6906	14.5145	14.0899	5.22218	4.69314	-0.246216	0.0322335	-1.48819	0.0143419	-1.10826	0.00252972
716.26	26.4651	25.6854	14.4997	14.087	5.20155	4.69218	-0.252151	0.0322269	-1.49693	0.014339	-1.12779	0.0025292
717.26	26.4591	25.6802	14.488	14.0841	5.20766	4.69123	-0.265747	0.0322203	-1.48116	0.014336	-1.13841	0.00252868
718.26	26.4326	25.6749	14.4655	14.0813	5.20265	4.69027	-0.265747	0.0322137	-1.46255	0.0143331	-1.14029	0.00252817
719.26	26.4111	25.6697	14.445	14.0784	5.19093	4.68931	-0.262939	0.0322071	-1.45694	0.0143302	-1.15388	0.00252765
720.26	26.3907	25.6644	14.4344	14.0755	5.19093	4.68835	-0.272781	0.0322005	-1.45084	0.0143272	-1.1442	0.00252713
721.26	26.374	25.6592	14.4442	14.0727	5.18202	4.6874	-0.277466	0.0321939	-1.44022	0.0143243	-1.13248	0.00252661
722.26	26.3604	25.6539	14.4353	14.0698	5.17921	4.68644	-0.271683	0.0321873	-1.4285	0.0143214	-1.13841	0.0025261
723.26	26.3497	25.6487	14.4414	14.0669	5.1703	4.68548	-0.265747	0.0321807	-1.4285	0.0143185	-1.14638	0.00252558
724.26	26.3321	25.6435	14.4473	14.0641	5.17641	4.68453	-0.251221	0.0321742	-1.43741	0.0143155	-1.15013	0.00252506
725.26	26.3283	25.6382	14.4548	14.0612	5.17609	4.68357	-0.259964	0.0321676	-1.4313	0.0143126	-1.15514	0.00252455
726.26	26.3185	25.633	14.4461	14.0583	5.18202	4.68262	-0.254028	0.032161	-1.40897	0.0143097	-1.16873	0.00252403
727.26	26.3068	25.6278	14.4325	14.0555	5.18703	4.68166	-0.260117	0.0321544	-1.41788	0.0143067	-1.15482	0.00252351
728.26	26.3068	25.6225	14.4247	14.0526	5.19281	4.68071	-0.252151	0.0321478	-1.4149	0.0143038	-1.10591	0.002523
729.26	26.3157	25.6173	14.413	14.0497	5.18672	4.67975	-0.261063	0.0321412	-1.42569	0.0143009	-1.10233	0.00252248
730.26	26.3185	25.6121	14.413	14.0469	5.16328	4.6788	-0.261063	0.0321347	-1.43553	0.014298	-1.0817	0.00252196
731.26	26.3213	25.6068	14.3994	14.044	5.15578	4.67784	-0.252304	0.0321281	-1.45506	0.014295	-1.07982	0.00252145
732.26	26.3126	25.6016	14.3789	14.0411	5.14093	4.67689	-0.25325	0.0321215	-1.47459	0.0142921	-1.07108	0.00252093
733.26	26.3076	25.5964	14.3681	14.0383	5.11359	4.67593	-0.25325	0.0321149	-1.496	0.0142892	-1.07701	0.00252041
734.26	26.2733	25.5912	14.3594	14.0354	5.09718	4.67498	-0.25528	0.0321084	-1.50584	0.0142862	-1.07701	0.0025199
735.26	26.2618	25.5859	14.3622	14.0326	5.08344	4.67402	-0.260117	0.0321018	-1.52538	0.0142833	-1.08482	0.00251938
736.26	26.251	25.5807	14.3544	14.0297	5.07265	4.67307	-0.280594	0.0320952	-1.53897	0.0142804	-1.09061	0.00251887
737.26	26.2422	25.5755	14.3533	14.0268	5.07172	4.67212	-0.291214	0.0320886	-1.54491	0.0142775	-1.08873	0.00251835
738.26	26.2197	25.5703	14.3551	14.024	5.07265	4.67116	-0.294189	0.0320821	-1.54771	0.0142746	-1.09654	0.00251784
739.26	26.2091	25.5651	14.3758	14.0211	5.06093	4.67021	-0.30481	0.0320755	-1.54678	0.0142716	-1.09654	0.00251732
740.26	26.1974	25.5598	14.3845	14.0183	5.05219	4.66926	-0.296997	0.032069	-1.55663	0.0142687	-1.11607	0.00251681
741.26	26.1896	25.5546	14.3934	14.0154	5.05812	4.6683	-0.285278	0.0320624	-1.54678	0.0142658	-1.10123	0.00251629
742.26	26.1779	25.5494	14.4012	14.0125	5.06984	4.66735	-0.283401	0.0320558	-1.536	0.0142629	-1.08951	0.00251578
743.26	26.1673	25.5442	14.3875	14.0097	5.06093	4.6664	-0.274658	0.0320493	-1.52725	0.01426	-1.0817	0.00251526
744.26	26.1583	25.539	14.3739	14.0068	5.0639	4.66545	-0.280594	0.0320427	-1.50865	0.014257	-1.08482	0.00251475
745.26	26.1505	25.5338	14.3544	14.004	5.06671	4.66449	-0.274658	0.0320361	-1.496	0.0142541	-1.06998	0.00251423
746.26	26.1505	25.5285	14.3455	14.0011	5.07265	4.66354	-0.271683	0.0320296	-1.49693	0.0142512	-1.06998	0.00251372
747.26	26.1388	25.5233	14.325	13.9983	5.06093	4.66259	-0.282471	0.032023	-1.496	0.0142483	-1.06216	0.0025132
748.26	26.1221	25.5181	14.317	13.9954	5.05219	4.66164	-0.302933	0.0320165	-1.49693	0.0142454	-1.05936	0.00251269
749.26	26.1016	25.5129	14.3083	13.9926	5.05812	4.66069	-0.298874	0.0320099	-1.50772	0.0142425	-1.0692	0.00251217
750.26	26.0771	25.5077	14.3055	13.9897	5.06984	4.65974	-0.288086	0.0320034	-1.50162	0.0142395	-1.08279	0.00251166
751.26	26.0471	25.5025	14.3005	13.9869	5.07578	4.65878	-0.278244	0.0319968	-1.50772	0.0142366	-1.07982	0.00251115
752.26	26.0313	25.4973	14.2858	13.984	5.08656	4.65783	-0.28215	0.0319903	-1.51944	0.0142337	-1.08591	0.00251063
753.26	26.0127	25.4921	14.2742	13.9812	5.07452	4.65688	-0.276367	0.0319837	-1.50272	0.0142308	-1.09654	0.00251012
754.26	26.0099	25.4869	14.2723	13.9783	5.05499	4.65593	-0.252777	0.0319772	-1.491	0.0142279	-1.10826	0.0025096
755.26	25.9982	25.4817	14.2497	13.9755	5.0414	4.65498	-0.237305	0.0319706	-1.4774	0.014225	-1.09061	0.00250909
756.26	26.0071	25.4765	14.2244	13.9726	5.01202	4.65403	-0.220749	0.0319641	-1.45975	0.0142221	-1.0681	0.00250858
757.26	26.001	25.4713	14.2333	13.9698	4.99953	4.65308	-0.218872	0.0319576	-1.45694	0.0142191	-1.07701	0.00250806
758.26	25.9755	25.4661	14.2156	13.9669	4.98187	4.65213	-0.222	0.031951	-1.45193	0.0142162	-1.06998	0.00250755
759.26	25.9708	25.4609	14.1942	13.9641	4.98593	4.65118	-0.213089	0.0319445	-1.44022	0.0142133	-1.06998	0.00250704
760.26	25.9619	25.4557	14.1676	13.9612	4.99672	4.65023	-0.218094	0.0319379	-1.44302	0.0142104	-1.07889	0.00250652
761.26	25.9532	25.4505	14.1611	13.9584	4.99765	4.64929	-0.237625	0.0319314	-1.44803	0.0142075	-1.0817	0.00250601
762.26	25.9396	25.4453	14.163	13.9555	4.98781	4.64834	-0.243408	0.0319249	-1.44022	0.0142046	-1.0845	0.0025055
763.26	25.9377	25.4401	14.1512	13.9527	5.00734	4.64739	-0.234497	0.0319183	-1.45975	0.0142017	-1.0817	0.00250498
764.26	25.9396	25.4349	14.163	13.9498	5.00734	4.64644	-0.234497	0.0319118	-1.45381	0.0141988	-1.0817	0.00250447
765.26	25.929	25.4297	14.163	13.947	4.98781	4.64549	-0.246216	0.0319053	-1.45975	0.0141959	-1.08951	0.00250396
766.26	25.9201	25.4245	14.1661	13.9442	4.98781	4.64454	-0.246216	0.0318987	-1.46568	0.014193	-1.08357	0.00250345
767.26	25.9083	25.4193	14.157	13.9413	4.99953	4.6436	-0.237305	0.0318922	-1.45975	0.0141901	-1.07388	0.00250293
768.26	25.8994	25.4141	14.1462	13.9385	5.00734	4.64265	-0.254028	0.0318857	-1.44209	0.0141872	-1.0681	0.00250242
769.26	25.8771	25.4089	14.1434	13.9356	5.01312	4.6417	-0.261841	0.0318792	-1.44022	0.0141843	-1.07889	0.00250191
770.26	25.8724	25.4037	14.1258	13.9328	5.03078	4.64075	-0.261841	0.0318726	-1.42068	0.0141814	-1.07388	0.0025014
771.26	25.8633	25.3986	14.1061	13.93	5.06203	4.63981	-0.255905	0.0318661	-1.42068	0.0141785	-1.06216	0.00250089
772.26	25.838	25.3934	14.1062	13.9271	5.07265	4.63886	-0.259964	0.0318596	-1.42068	0.0141756	-1.0692	0.00250037
773.26	25.8302	25.3882	14.0973	13.9243	5.06281	4.63791	-0.279648	0.0318531	-1.4324	0.0141727	-1.08873	0.00249986
774.26	25.8185	25.383	14.0927	13.9214	5.0461	4.63697	-0.283401	0.0318465	-1.44615	0.0141698	-1.10826	0.00249935
775.26	25.8096	25.3778	14.0837	13.9186	5.02374	4.63602	-0.274658	0.03184	-1.44022	0.0141669	-1.11014	0.00249884
776.26	25.7841	25.3726	14.0809	13.9158	5.00421	4.63507	-0.271683	0.0318335	-1.46866	0.014164	-1.10716	0.00249833
777.26	25.7883	25.3675	14.0731	13.9129	4.98468	4.63413	-0.262939	0.031827	-1.47147	0.0141611	-1.11795	0.00249782
778.26	25.7716	25.3623	14.082	13.9101	4.96515	4.63318	-0.280594	0.0318205	-1.47147	0.0141582	-1.10716	0.00249731
779.26	25.7658	25.3571	14.088	13.9073	4.94562	4.63224	-0.277466	0.031814	-1.4774	0.0141553	-1.08951	0.00249679
780.26	25.7688	25.3519	14.0908	13.9044	4.93515	4.63129	-0.277466	0.0318075	-1.46756	0.0141524	-1.0817	0.00249628
781.26	25.7747	25.3467	14.1105	13.9016	4.94594	4.63035	-0.277466	0.0318009	-1.47459	0.0141495	-1.06216	0.00249577
782.26	25.7836	25.3416	14.122	13.8988	4.95578	4.6294	-0.285278	0.0317944	-1.47647	0.0141466	-1.04764	0.00249526
783.26	25.7912	25.3364	14.1406	13.8959	4.94875	4.62846	-0.276367	0.0317879	-1.47928	0.0141437	-1.03795	0.00249475
784.26	25.7705	25.3312	14.1434	13.8931	4.94093	4.62751	-0.267624	0.0317814	-1.47928	0.0141408	-1.03983	0.00249424
785.26	25.7599	25.3261	14.1434	13.8903	4.96359	4.62657	-0.265747	0.0317749	-1.48209	0.0141379	-1.02904	0.00249373
786.26	25.7344	25.3209	14.1356	13.8874	4.96359	4.62562	-0.271683	0.0317684	-1.48116	0.014135	-1.02029	0.00249322
787.26	25.7041	25.3157	14.1072	13.8846	4.94875	4.62468	-0.265747	0.0317619	-1.47147	0.0141321	-1.02904	0.00249271
788.26	25.669	25.3105	14.0927	13.8818	4.94281	4.62374	-0.254028	0.0317554	-1.46255	0.0141292	-1.03091	0.0024922
789.26	25.6566	25.3054	14.0661	13.8789	4.94687	4.62279	-0.24231	0.0317489	-1.44913	0.0141263	-1.03091	0.00249169
790.26	25.6487	25.3002	14.0387	13.8761	4.94875	4.62185	-0.251221	0.0317424	-1.44022	0.0141234	-1.02498	0.00249118
791.26	25.6388	25.295	14.0341	13.8733	4.94281	4.62091	-0.254028	0.0317359	-1.42662	0.0141205	-1.03091	0.00249067
792.26	25.6341	25.2899	14.0192	13.8705	4.93983	4.61996	-0.262939	0.0317294	-1.42569	0.0141176	-1.03685	0.00249016
793.26	25.636	25.2847	14.0134	13.8676	4.95766	4.61902	-0.283401	0.0317229	-1.44022	0.0141148	-1.03983	0.00248965
794.26	25.631	25.2796	14.0106	13.8648	4.96046	4.61808	-0.298874	0.0317164	-1.43553	0.0141119	-1.05466	0.00248914
795.26	25.6115	25.2744	14.0177	13.862	4.96046	4.61713	-0.296997	0.0317099	-1.45506	0.014109	-1.08873	0.00248863
796.26	25.5979	25.2692	14.0195	13.8591	4.9664	4.61619	-0.299805	0.0317035	-1.45694	0.0141061	-1.08763	0.00248812
797.26	25.588	25.2641	14.0223	13.8563	4.95656	4.61525	-0.296997	0.031697	-1.45975	0.0141032	-1.09061	0.00248761
798.26	25.5626	25.2589	14.0283	13.8535	4.94875	4.61431	-0.296997	0.0316905	-1.46568	0.0141003	-1.10716	0.0024871
799.26	25.5607	25.2538	14.0313	13.8507	4.94875	4.61337	-0.296997	0.031684	-1.45975	0.0140974	-1.09529	0.00248659
800.26	25.5744	25.2486	14.0251	13.8478	4.95187	4.61242	-0.296997	0.0316775	-1.44803	0.0140945	-1.09232	0.00248608
801.26	25.5685	25.2435	14.0242	13.845	4.94875	4.61148	-0.296997	0.031671	-1.44022	0.0140917	-1.08951	0.00248558
802.26	25.5852	25.2383	14.0134	13.8422	4.95656	4.61054	-0.285278	0.0316645	-1.45224	0.0140888	-1.10123	0.00248507
803.26	25.588	25.2331	14.0117	13.8394	4.95343	4.6096	-0.285278	0.0316581	-1.46288	0.0140859	-1.10123	0.00248456
804.26	25.5802	25.228	13.9939	13.8366	4.95656	4.60866	-0.294189	0.0316516	-1.48241	0.014083	-1.09529	0.00248405
805.26	25.5685	25.2228	13.9852	13.8337	4.95062	4.60772	-0.277466	0.0316451	-1.48819	0.0140801	-1.09935	0.00248354
806.26	25.5596	25.2177	13.9892	13.8309	4.93202	4.60678	-0.256836	0.0316386	-1.47928	0.0140772	-1.10904	0.00248303
807.26	25.5536	25.2125	13.9864	13.8281	4.92328	4.60584	-0.265747	0.0316321	-1.47928	0.0140744	-1.1031	0.00248252
808.26	25.5419	25.2074	13.9911	13.8253	4.90077	4.6049	-0.262939	0.0316257	-1.47147	0.0140715	-1.09935	0.00248202
809.26	25.5224	25.2022	13.9852	13.8225	4.88124	4.60396	-0.271683	0.0316192	-1.47147	0.0140686	-1.0817	0.00248151
810.26	25.5088	25.1971	13.9833	13.8196	4.88031	4.60302	-0.285278	0.0316127	-1.45975	0.0140657	-1.06998	0.002481
811.26	25.5118	25.192	13.9744	13.8168	4.87531	4.60208	-0.285278	0.0316063	-1.45975	0.0140628	-1.07576	0.00248049
812.26	25.5099	25.1868	13.9773	13.814	4.89015	4.60114	-0.311844	0.0315998	-1.45787	0.01406	-1.05325	0.00247999
813.26	25.501	25.1817	13.9606	13.8112	4.89015	4.6002	-0.319656	0.0315933	-1.44803	0.0140571	-1.05154	0.00247948
814.26	25.4833	25.1765	13.9489	13.8084	4.905	4.59926	-0.321533	0.0315869	-1.44803	0.0140542	-1.06216	0.00247897
815.26	25.4638	25.1714	13.9353	13.8056	4.91562	4.59833	-0.330276	0.0315804	-1.43631	0.0140513	-1.05435	0.00247846
816.26	25.4502	25.1663	13.9325	13.8028	4.91469	4.59739	-0.333252	0.0315739	-1.43741	0.0140485	-1.04857	0.00247796
817.26	25.4297	25.1611	13.9247	13.7999	4.90968	4.59645	-0.324341	0.0315675	-1.43443	0.0140456	-1.03983	0.00247745
818.26	25.3994	25.156	13.9023	13.7971	4.91859	4.59551	-0.316528	0.031561	-1.44522	0.0140427	-1.05748	0.00247694
819.26	25.386	25.1508	13.9064	13.7943	4.9214	4.59457	-0.316528	0.0315545	-1.4449	0.0140398	-1.06529	0.00247643
820.26	25.3615	25.1457	13.9023	13.7915	4.92313	4.59364	-0.316528	0.0315481	-1.44022	0.014037	-1.06216	0.00247593
821.26	25.3451	25.1406	13.9005	13.7887	4.91156	4.5927	-0.307617	0.0315416	-1.44615	0.0140341	-1.05936	0.00247542
822.26	25.3469	25.1354	13.8994	13.7859	4.90968	4.59176	-0.293091	0.0315352	-1.44803	0.0140312	-1.06029	0.00247491
823.26	25.3362	25.1303	13.8817	13.7831	4.90968	4.59082	-0.302002	0.0315287	-1.4285	0.0140283	-1.06216	0.00247441
824.26	25.3157	25.1252	13.8562	13.7803	4.9039	4.58989	-0.30481	0.0315223	-1.4285	0.0140255	-1.04263	0.0024739
825.26	25.306	25.1201	13.8455	13.7775	4.88625	4.58895	-0.325439	0.0315158	-1.42569	0.0140226	-1.03201	0.00247339
826.26	25.306	25.1149	13.825	13.7746	4.86078	4.58801	-0.328247	0.0315094	-1.42068	0.0140197	-1.02904	0.00247289
827.26	25.3079	25.1098	13.8064	13.7718	4.85703	4.58708	-0.328247	0.0315029	-1.40897	0.0140169	-1.03983	0.00247238
828.26	25.294	25.1047	13.8114	13.769	4.8589	4.58614	-0.322464	0.0314965	-1.39412	0.014014	-1.04857	0.00247188
829.26	25.2883	25.0995	13.8114	13.7662	4.86671	4.58521	-0.337936	0.03149	-1.39412	0.0140111	-1.05653	0.00247137
830.26	25.2822	25.0944	13.8231	13.7634	4.8725	4.58427	-0.319336	0.0314836	-1.40115	0.0140083	-1.0681	0.00247086
831.26	25.2766	25.0893	13.8278	13.7606	4.86952	4.58333	-0.301682	0.0314771	-1.40115	0.0140054	-1.09061	0.00247036
832.26	25.2599	25.0842	13.8278	13.7578	4.87843	4.5824	-0.30481	0.0314707	-1.42381	0.0140025	-1.10513	0.00246985
833.26	25.2404	25.0791	13.8348	13.755	4.88031	4.58146	-0.310745	0.0314643	-1.46288	0.0139997	-1.11888	0.00246935
834.26	25.2208	25.0739	13.8348	13.7522	4.87843	4.58053	-0.321533	0.0314578	-1.47928	0.0139968	-1.12076	0.00246884
835.26	25.1924	25.0688	13.8231	13.7494	4.87062	4.57959	-0.30481	0.0314514	-1.50302	0.0139939	-1.12076	0.00246834
836.26	25.1779	25.0637	13.8036	13.7466	4.87062	4.57866	-0.313721	0.0314449	-1.51366	0.0139911	-1.12544	0.00246783
837.26	25.1701	25.0586	13.793	13.7438	4.86171	4.57772	-0.334183	0.0314385	-1.50162	0.0139882	-1.10591	0.00246733
838.26	25.1611	25.0535	13.8017	13.741	4.8589	4.57679	-0.33606	0.0314321	-1.48396	0.0139853	-1.10123	0.00246682
839.26	25.1602	25.0483	13.8036	13.7382	4.83937	4.57586	-0.321213	0.0314256	-1.47334	0.0139825	-1.07857	0.00246632
840.26	25.1583	25.0432	13.8172	13.7354	4.83344	4.57492	-0.301682	0.0314192	-1.44302	0.0139796	-1.06216	0.00246581
841.26	25.1583	25.0381	13.8348	13.7326	4.83749	4.57399	-0.310745	0.0314128	-1.44022	0.0139768	-1.06216	0.00246531
842.26	25.1701	25.033	13.8291	13.7298	4.82765	4.57306	-0.312622	0.0314063	-1.4313	0.0139739	-1.06029	0.0024648
843.26	25.1701	25.0279	13.8458	13.727	4.81703	4.57212	-0.30481	0.0313999	-1.43037	0.013971	-1.07108	0.0024643
844.26	25.1701	25.0228	13.8309	13.7242	4.81984	4.57119	-0.302002	0.0313935	-1.44334	0.0139682	-1.10233	0.00246379
845.26	25.1583	25.0177	13.838	13.7214	4.81984	4.57026	-0.319656	0.0313871	-1.45694	0.0139653	-1.11295	0.00246329
846.26	25.1537	25.0126	13.8458	13.7186	4.80624	4.56932	-0.339188	0.0313806	-1.47147	0.0139625	-1.11107	0.00246279
847.26	25.1505	25.0075	13.8516	13.7158	4.7975	4.56839	-0.349655	0.0313742	-1.45975	0.0139596	-1.11014	0.00246228
848.26	25.1193	25.0024	13.8337	13.713	4.80344	4.56746	-0.353714	0.0313678	-1.45193	0.0139567	-1.11888	0.00246178
849.26	25.0997	24.9973	13.825	13.7102	4.82297	4.56653	-0.357468	0.0313614	-1.43834	0.0139539	-1.10123	0.00246127
850.26	25.0802	24.9922	13.8231	13.7074	4.82297	4.56559	-0.360275	0.031355	-1.44913	0.013951	-1.09061	0.00246077
851.26	25.0685	24.987	13.8142	13.7046	4.82875	4.56466	-0.343567	0.0313485	-1.44615	0.0139482	-1.0845	0.00246027
852.26	25.0322	24.9819	13.7977	13.7018	4.83749	4.56373	-0.312317	0.0313421	-1.45694	0.0139453	-1.07889	0.00245976
853.26	25.0294	24.9768	13.7751	13.699	4.84828	4.5628	-0.310593	0.0313357	-1.46568	0.0139425	-1.06497	0.00245926
854.26	25.0266	24.9717	13.7723	13.6963	4.84406	4.56187	-0.299805	0.0313293	-1.46756	0.0139396	-1.05045	0.00245876
855.26	25.0247	24.9667	13.7692	13.6935	4.81984	4.56094	-0.289963	0.0313229	-1.47334	0.0139368	-1.04732	0.00245825
856.26	25.0326	24.9616	13.7586	13.6907	4.82265	4.56001	-0.285278	0.0313165	-1.46255	0.0139339	-1.04263	0.00245775
857.26	25.0266	24.9565	13.7626	13.6879	4.82765	4.55908	-0.296997	0.0313101	-1.44678	0.0139311	-1.03091	0.00245725
858.26	25.0216	24.9514	13.7617	13.6851	4.82172	4.55815	-0.295898	0.0313036	-1.45193	0.0139282	-1.0367	0.00245674
859.26	25.0158	24.9463	13.7645	13.6823	4.81093	4.55722	-0.293091	0.0312972	-1.45975	0.0139254	-1.02591	0.00245624
860.26	24.9982	24.9412	13.7509	13.6795	4.80922	4.55629	-0.287155	0.0312908	-1.46568	0.0139225	-1.0231	0.00245574
861.26	24.9787	24.9361	13.7364	13.6767	4.81203	4.55536	-0.285278	0.0312844	-1.46866	0.0139197	-1.02029	0.00245523
862.26	24.968	24.931	13.7286	13.6739	4.81203	4.55443	-0.285278	0.031278	-1.47147	0.0139168	-1.02122	0.00245473
863.26	24.9662	24.9259	13.7276	13.6711	4.80312	4.5535	-0.291214	0.0312716	-1.46568	0.013914	-1.01717	0.00245423
864.26	24.968	24.9208	13.7137	13.6684	4.80344	4.55257	-0.294189	0.0312652	-1.46756	0.0139111	-1.00951	0.00245373
865.26	24.9466	24.9157	13.7137	13.6656	4.81703	4.55164	-0.288086	0.0312588	-1.46756	0.0139083	-1.0231	0.00245323
866.26	24.9377	24.9106	13.7048	13.6628	4.81984	4.55071	-0.274658	0.0312524	-1.47647	0.0139054	-1.03091	0.00245272
867.26	24.929	24.9056	13.7137	13.66	4.82578	4.54978	-0.256836	0.031246	-1.47459	0.0139026	-1.04451	0.00245222
868.26	24.9318	24.9005	13.7126	13.6572	4.83656	4.54885	-0.236374	0.0312396	-1.48631	0.0138997	-1.04544	0.00245172
869.26	24.9201	24.8954	13.7156	13.6544	4.81984	4.54792	-0.229813	0.0312332	-1.48819	0.0138969	-1.06216	0.00245122
870.26	24.9005	24.8903	13.7137	13.6517	4.81093	4.547	-0.226685	0.0312269	-1.4774	0.013894	-1.07388	0.00245072
871.26	24.9005	24.8852	13.7197	13.6489	4.81703	4.54607	-0.235596	0.0312205	-1.45975	0.0138912	-1.07388	0.00245021
872.26	24.9005	24.8801	13.7276	13.6461	4.81093	4.54514	-0.244339	0.0312141	-1.44803	0.0138883	-1.07388	0.00244971
873.26	24.9005	24.8751	13.7255	13.6433	4.80219	4.54421	-0.243408	0.0312077	-1.43318	0.0138855	-1.06216	0.00244921
874.26	24.881	24.87	13.7166	13.6405	4.7914	4.54329	-0.26387	0.0312013	-1.44022	0.0138827	-1.07108	0.00244871
875.26	24.8604	24.8649	13.6989	13.6377	4.80031	4.54236	-0.267624	0.0311949	-1.4285	0.0138798	-1.0692	0.00244821
876.26	24.8497	24.8598	13.6825	13.635	4.80031	4.54143	-0.270432	0.0311885	-1.42256	0.013877	-1.06029	0.00244771
877.26	24.8302	24.8548	13.6825	13.6322	4.77374	4.5405	-0.268555	0.0311821	-1.42662	0.0138741	-1.05936	0.00244721
878.26	24.8185	24.8497	13.6778	13.6294	4.74249	4.53958	-0.268555	0.0311758	-1.44022	0.0138713	-1.06216	0.00244671
879.26	24.793	24.8446	13.6778	13.6266	4.7289	4.53865	-0.259811	0.0311694	-1.44022	0.0138685	-1.06029	0.00244621
880.26	24.7822	24.8395	13.6809	13.6239	4.73187	4.53773	-0.257935	0.031163	-1.43428	0.0138656	-1.06998	0.0024457
881.26	24.7646	24.8345	13.6778	13.6211	4.73593	4.5368	-0.271683	0.0311566	-1.42349	0.0138628	-1.05623	0.0024452
882.26	24.7588	24.8294	13.6602	13.6183	4.74672	4.53587	-0.260117	0.0311502	-1.44022	0.0138599	-1.05325	0.0024447
883.26	24.7618	24.8243	13.6434	13.6155	4.76906	4.53495	-0.272781	0.0311439	-1.43318	0.0138571	-1.0356	0.0024442
884.26	24.7716	24.8193	13.6328	13.6127	4.77797	4.53402	-0.283401	0.0311375	-1.45193	0.0138543	-1.02498	0.0024437
885.26	24.7747	24.8142	13.6416	13.61	4.78671	4.5331	-0.293091	0.0311311	-1.45084	0.0138514	-1.01419	0.0024432
886.26	24.7688	24.8091	13.6434	13.6072	4.76906	4.53217	-0.30481	0.0311248	-1.46866	0.0138486	-1.01138	0.0024427
887.26	24.7463	24.8041	13.6512	13.6044	4.76312	4.53125	-0.298874	0.0311184	-1.48631	0.0138458	-1.02029	0.0024422
888.26	24.7493	24.799	13.6512	13.6017	4.77187	4.53032	-0.299805	0.031112	-1.491	0.0138429	-1.02904	0.0024417
889.26	24.7404	24.7939	13.663	13.5989	4.78078	4.5294	-0.30481	0.0311056	-1.49881	0.0138401	-1.03983	0.0024412
890.26	24.7287	24.7889	13.6719	13.5961	4.80031	4.52847	-0.30481	0.0310993	-1.50772	0.0138373	-1.04857	0.0024407
891.26	24.7315	24.7838	13.6806	13.5933	4.81093	4.52755	-0.296997	0.0310929	-1.51053	0.0138344	-1.05045	0.0024402
892.26	24.7227	24.7787	13.6914	13.5906	4.82172	4.52663	-0.294189	0.0310865	-1.51053	0.0138316	-1.06216	0.0024397
893.26	24.7208	24.7737	13.6973	13.5878	4.81984	4.5257	-0.296997	0.0310802	-1.51334	0.0138288	-1.06216	0.0024392
894.26	24.7208	24.7686	13.7227	13.585	4.80031	4.52478	-0.296997	0.0310738	-1.50162	0.0138259	-1.05623	0.00243871
895.26	24.7236	24.7636	13.7166	13.5823	4.80031	4.52385	-0.291214	0.0310675	-1.50662	0.0138231	-1.0681	0.00243821
896.26	24.706	24.7585	13.69	13.5795	4.78859	4.52293	-0.302002	0.0310611	-1.50662	0.0138203	-1.07889	0.00243771
897.26	24.6955	24.7535	13.6755	13.5767	4.78078	4.52201	-0.30481	0.0310547	-1.51553	0.0138175	-1.08873	0.00243721
898.26	24.6974	24.7484	13.6559	13.574	4.78078	4.52109	-0.310745	0.0310484	-1.51834	0.0138146	-1.0817	0.00243671
899.26	24.6797	24.7434	13.6364	13.5712	4.78078	4.52016	-0.321533	0.031042	-1.51944	0.0138118	-1.08763	0.00243621
900.26	24.6701	24.7383	13.6317	13.5684	4.7914	4.51924	-0.340271	0.0310357	-1.52225	0.013809	-1.09842	0.00243571
901.26	24.6505	24.7333	13.6239	13.5657	4.78265	4.51832	-0.341995	0.0310293	-1.51053	0.0138061	-1.0817	0.00243521
902.26	24.6447	24.7282	13.6192	13.5629	4.78859	4.5174	-0.33606	0.031023	-1.51053	0.0138033	-1.0817	0.00243472
903.26	24.6329	24.7232	13.6211	13.5601	4.76906	4.51647	-0.33606	0.0310166	-1.50162	0.0138005	-1.08482	0.00243422
904.26	24.6193	24.7181	13.6103	13.5574	4.76718	4.51555	-0.33606	0.0310103	-1.48209	0.0137977	-1.08482	0.00243372
905.26	24.6115	24.7131	13.6016	13.5546	4.77797	4.51463	-0.324341	0.0310039	-1.46162	0.0137949	-1.09654	0.00243322
906.26	24.5802	24.708	13.5997	13.5518	4.77609	4.51371	-0.301682	0.0309976	-1.45084	0.013792	-1.09842	0.00243272
907.26	24.549	24.703	13.5986	13.5491	4.78499	4.51279	-0.28215	0.0309912	-1.45694	0.0137892	-1.08763	0.00243222
908.26	24.5216	24.6979	13.6005	13.5463	4.79562	4.51187	-0.277466	0.0309849	-1.45975	0.0137864	-1.09842	0.00243173
909.26	24.513	24.6929	13.6005	13.5436	4.80031	4.51095	-0.271683	0.0309786	-1.45193	0.0137836	-1.11763	0.00243123
910.26	24.5177	24.6879	13.5867	13.5408	4.80624	4.51003	-0.271835	0.0309722	-1.46678	0.0137807	-1.10591	0.00243073
911.26	24.5247	24.6828	13.5759	13.538	4.78265	4.50911	-0.283401	0.0309659	-1.47147	0.0137779	-1.09232	0.00243023
912.26	24.5443	24.6778	13.5661	13.5353	4.78078	4.50819	-0.300125	0.0309595	-1.48631	0.0137751	-1.0817	0.00242974
913.26	24.5372	24.6727	13.5614	13.5325	4.76015	4.50727	-0.321533	0.0309532	-1.49881	0.0137723	-1.08357	0.00242924
914.26	24.5177	24.6677	13.5466	13.5298	4.74953	4.50635	-0.331375	0.0309469	-1.50584	0.0137695	-1.0817	0.00242874
915.26	24.5188	24.6627	13.5447	13.527	4.73781	4.50543	-0.329025	0.0309405	-1.50772	0.0137666	-1.07982	0.00242825
916.26	24.4904	24.6576	13.5555	13.5242	4.73891	4.50451	-0.33606	0.0309342	-1.52538	0.0137638	-1.06998	0.00242775
917.26	24.4787	24.6526	13.5564	13.5215	4.74062	4.50359	-0.33606	0.0309279	-1.53319	0.013761	-1.06998	0.00242725
918.26	24.4708	24.6476	13.5614	13.5187	4.73781	4.50267	-0.33606	0.0309215	-1.54491	0.0137582	-1.06998	0.00242675
919.26	24.4768	24.6425	13.5555	13.516	4.73781	4.50175	-0.33606	0.0309152	-1.53006	0.0137554	-1.07889	0.00242626
920.26	24.4876	24.6375	13.54	13.5132	4.74953	4.50083	-0.33606	0.0309089	-1.53897	0.0137526	-1.08763	0.00242576
921.26	24.4787	24.6325	13.5391	13.5105	4.74249	4.49991	-0.33606	0.0309026	-1.54178	0.0137497	-1.09842	0.00242526
922.26	24.4846	24.6274	13.5341	13.5077	4.73	4.49899	-0.31543	0.0308962	-1.54178	0.0137469	-1.10716	0.00242477
923.26	24.4954	24.6224	13.5223	13.505	4.71234	4.49808	-0.289963	0.0308899	-1.54771	0.0137441	-1.10904	0.00242427
924.26	24.5052	24.6174	13.5145	13.5022	4.7164	4.49716	-0.285278	0.0308836	-1.54834	0.0137413	-1.1031	0.00242378
925.26	24.4982	24.6124	13.5028	13.4995	4.71828	4.49624	-0.282471	0.0308773	-1.53287	0.0137385	-1.10716	0.00242328
926.26	24.4818	24.6073	13.5028	13.4967	4.71046	4.49532	-0.285278	0.030871	-1.53006	0.0137357	-1.1031	0.00242278
927.26	24.4876	24.6023	13.5087	13.4939	4.70766	4.49441	-0.296997	0.0308646	-1.54678	0.0137329	-1.11295	0.00242229
928.26	24.4846	24.5973	13.5028	13.4912	4.70155	4.49349	-0.311844	0.0308583	-1.54771	0.0137301	-1.11295	0.00242179
929.26	24.468	24.5923	13.5089	13.4884	4.69875	4.49257	-0.319656	0.030852	-1.52303	0.0137272	-1.11295	0.0024213
930.26	24.4513	24.5872	13.5177	13.4857	4.71046	4.49165	-0.339188	0.0308457	-1.52725	0.0137244	-1.10716	0.0024208
931.26	24.4396	24.5822	13.5205	13.483	4.71828	4.49074	-0.355591	0.0308394	-1.52115	0.0137216	-1.11795	0.00242031
932.26	24.429	24.5772	13.5028	13.4802	4.72406	4.48982	-0.355591	0.0308331	-1.53006	0.0137188	-1.12967	0.00241981
933.26	24.426	24.5722	13.4773	13.4775	4.73	4.48891	-0.355591	0.0308268	-1.51521	0.013716	-1.13841	0.00241931
934.26	24.4201	24.5672	13.4501	13.4747	4.73593	4.48799	-0.366211	0.0308204	-1.50162	0.0137132	-1.1356	0.00241882
935.26	24.4201	24.5622	13.4461	13.472	4.75266	4.48707	-0.357468	0.0308141	-1.49881	0.0137104	-1.15201	0.00241832
936.26	24.4083	24.5571	13.4294	13.4692	4.75734	4.48616	-0.34668	0.0308078	-1.50772	0.0137076	-1.15201	0.00241783
937.26	24.4173	24.5521	13.4158	13.4665	4.74953	4.48524	-0.343872	0.0308015	-1.50475	0.0137048	-1.15982	0.00241733
938.26	24.4111	24.5471	13.4325	13.4637	4.73781	4.48433	-0.332153	0.0307952	-1.51662	0.013702	-1.1656	0.00241684
939.26	24.3946	24.5421	13.4236	13.461	4.73781	4.48341	-0.333252	0.0307889	-1.51646	0.0136992	-1.1431	0.00241634
940.26	24.3752	24.5371	13.4344	13.4582	4.72406	4.4825	-0.324341	0.0307826	-1.51834	0.0136964	-1.12544	0.00241585
941.26	24.3576	24.5321	13.4236	13.4555	4.70155	4.48158	-0.324341	0.0307763	-1.53319	0.0136936	-1.13248	0.00241536
942.26	24.3469	24.5271	13.3953	13.4528	4.71046	4.48067	-0.316528	0.03077	-1.53787	0.0136908	-1.11763	0.00241486
943.26	24.3213	24.5221	13.3916	13.45	4.70766	4.47975	-0.307617	0.0307637	-1.54959	0.013688	-1.12357	0.00241437
944.26	24.3185	24.5171	13.4023	13.4473	4.70155	4.47884	-0.298874	0.0307574	-1.56912	0.0136852	-1.12076	0.00241387
945.26	24.3185	24.5121	13.4083	13.4445	4.70766	4.47792	-0.295898	0.0307511	-1.57693	0.0136824	-1.12967	0.00241338
946.26	24.3274	24.5071	13.4102	13.4418	4.69875	4.47701	-0.30481	0.0307448	-1.58865	0.0136796	-1.14732	0.00241289
947.26	24.3135	24.5021	13.4111	13.439	4.69687	4.4761	-0.30481	0.0307385	-1.58272	0.0136768	-1.15201	0.00241239
948.26	24.3047	24.4971	13.4161	13.4363	4.67921	4.47518	-0.324341	0.0307322	-1.57193	0.013674	-1.16873	0.0024119
949.26	24.3088	24.4921	13.4219	13.4336	4.68813	4.47427	-0.324341	0.030726	-1.5574	0.0136712	-1.16373	0.0024114
950.26	24.3079	24.4871	13.413	13.4308	4.67921	4.47336	-0.324341	0.0307197	-1.56912	0.0136684	-1.1431	0.00241091
951.26	24.2854	24.4821	13.3994	13.4281	4.6703	4.47244	-0.324341	0.0307134	-1.56319	0.0136656	-1.10591	0.00241042
952.26	24.293	24.4771	13.3875	13.4254	4.6675	4.47153	-0.306686	0.0307071	-1.55522	0.0136628	-1.08638	0.00240992
953.26	24.2912	24.4721	13.3622	13.4226	4.66437	4.47062	-0.273254	0.0307008	-1.55147	0.01366	-1.07388	0.00240943
954.26	24.2763	24.4671	13.3544	13.4199	4.64796	4.46971	-0.265747	0.0306945	-1.5524	0.0136572	-1.0692	0.00240894
955.26	24.2362	24.4621	13.3427	13.4172	4.62843	4.46879	-0.245117	0.0306882	-1.5574	0.0136544	-1.06529	0.00240844
956.26	24.2138	24.4571	13.3427	13.4144	4.6225	4.46788	-0.234497	0.030682	-1.5574	0.0136516	-1.08482	0.00240795
957.26	24.2091	24.4521	13.3337	13.4117	4.61171	4.46697	-0.243408	0.0306757	-1.57225	0.0136488	-1.09654	0.00240746
958.26	24.2013	24.4471	13.3231	13.4089	4.61	4.46606	-0.234497	0.0306694	-1.57521	0.013646	-1.09842	0.00240697
959.26	24.1896	24.4421	13.3055	13.4062	4.60703	4.46515	-0.243408	0.0306631	-1.58788	0.0136432	-1.09341	0.00240647
960.26	24.1966	24.4371	13.3153	13.4035	4.60297	4.46424	-0.252151	0.0306569	-1.5985	0.0136404	-1.07278	0.00240598
961.26	24.1896	24.4321	13.3153	13.4008	4.60703	4.46333	-0.248093	0.0306506	-1.60037	0.0136376	-1.07576	0.00240549
962.26	24.1818	24.4271	13.3153	13.398	4.6089	4.46241	-0.252151	0.0306443	-1.58272	0.0136348	-1.06497	0.002405
963.26	24.1818	24.4221	13.3184	13.3953	4.61781	4.4615	-0.280594	0.030638	-1.57193	0.013632	-1.06216	0.0024045
964.26	24.1701	24.4172	13.3408	13.3926	4.63234	4.46059	-0.285278	0.0306318	-1.58084	0.0136293	-1.05045	0.00240401
965.26	24.1877	24.4122	13.3516	13.3898	4.64015	4.45968	-0.302002	0.0306255	-1.58865	0.0136265	-1.04732	0.00240352
966.26	24.1868	24.4072	13.3633	13.3871	4.64015	4.45877	-0.296997	0.0306192	-1.58975	0.0136237	-1.06216	0.00240303
967.26	24.1985	24.4022	13.3603	13.3844	4.63124	4.45786	-0.30481	0.030613	-1.58678	0.0136209	-1.06216	0.00240254
968.26	24.1877	24.3972	13.3622	13.3816	4.62843	4.45695	-0.30481	0.0306067	-1.60037	0.0136181	-1.06998	0.00240204
969.26	24.1868	24.3922	13.3367	13.3789	4.64015	4.45604	-0.295898	0.0306004	-1.60037	0.0136153	-1.09061	0.00240155
970.26	24.176	24.3873	13.3064	13.3762	4.64906	4.45513	-0.287155	0.0305942	-1.6199	0.0136125	-1.0845	0.00240106
971.26	24.1466	24.3823	13.2919	13.3735	4.63124	4.45423	-0.288086	0.0305879	-1.61397	0.0136097	-1.07889	0.00240057
972.26	24.1271	24.3773	13.2751	13.3707	4.62531	4.45332	-0.279343	0.0305816	-1.61099	0.013607	-1.07388	0.00240008
973.26	24.1016	24.3723	13.2723	13.368	4.62843	4.45241	-0.277466	0.0305754	-1.60506	0.0136042	-1.06497	0.00239959
974.26	24.0802	24.3674	13.2547	13.3653	4.62843	4.4515	-0.277466	0.0305691	-1.57663	0.0136014	-1.04263	0.0023991
975.26	24.0713	24.3624	13.2677	13.3626	4.62843	4.45059	-0.285278	0.0305629	-1.57693	0.0135986	-1.04263	0.0023986
976.26	24.0607	24.3574	13.293	13.3598	4.61952	4.44968	-0.302933	0.0305566	-1.56319	0.0135958	-1.03983	0.00239811
977.26	24.049	24.3524	13.3017	13.3571	4.6225	4.44877	-0.293091	0.0305504	-1.54959	0.013593	-1.04857	0.00239762
978.26	24.049	24.3475	13.3008	13.3544	4.62062	4.44787	-0.285278	0.0305441	-1.53006	0.0135903	-1.06216	0.00239713
979.26	24.0462	24.3425	13.29	13.3517	4.62062	4.44696	-0.293091	0.0305379	-1.54022	0.0135875	-1.05936	0.00239664
980.26	24.0549	24.3375	13.2813	13.349	4.61952	4.44605	-0.287155	0.0305316	-1.5538	0.0135847	-1.0681	0.00239615
981.26	24.0443	24.3326	13.2705	13.3462	4.61078	4.44514	-0.268555	0.0305254	-1.56444	0.0135819	-1.07419	0.00239566
982.26	24.0521	24.3276	13.2695	13.3435	4.6089	4.44424	-0.2509	0.0305191	-1.56725	0.0135791	-1.08279	0.00239517
983.26	24.0579	24.3226	13.2645	13.3408	4.6089	4.44333	-0.237305	0.0305129	-1.56912	0.0135764	-1.0681	0.00239468
984.26	24.0755	24.3177	13.2528	13.3381	4.61484	4.44242	-0.228561	0.0305066	-1.58585	0.0135736	-1.07108	0.00239419
985.26	24.0685	24.3127	13.2528	13.3354	4.62843	4.44152	-0.234497	0.0305004	-1.58553	0.0135708	-1.05435	0.0023937
986.26	24.0626	24.3077	13.2705	13.3326	4.63734	4.44061	-0.225586	0.0304941	-1.59146	0.013568	-1.04857	0.00239321
987.26	24.0518	24.3028	13.2813	13.3299	4.64015	4.4397	-0.222778	0.0304879	-1.58865	0.0135652	-1.04451	0.00239272
988.26	24.0412	24.2978	13.2723	13.3272	4.64796	4.4388	-0.231689	0.0304816	-1.60037	0.0135625	-1.04263	0.00239223
989.26	24.0177	24.2928	13.2813	13.3245	4.65077	4.43789	-0.241531	0.0304754	-1.60928	0.0135597	-1.03372	0.00239174
990.26	24.0099	24.2879	13.29	13.3218	4.64203	4.43699	-0.254028	0.0304692	-1.61209	0.0135569	-1.03983	0.00239125
991.26	23.9893	24.2829	13.2919	13.3191	4.64015	4.43608	-0.246216	0.0304629	-1.6199	0.0135541	-1.05748	0.00239076
992.26	23.9982	24.278	13.2966	13.3163	4.63124	4.43518	-0.261063	0.0304567	-1.6199	0.0135514	-1.06216	0.00239027
993.26	23.9833	24.273	13.2887	13.3136	4.62843	4.43427	-0.256836	0.0304505	-1.6199	0.0135486	-1.07982	0.00238978
994.26	23.9922	24.2681	13.2947	13.3109	4.62843	4.43337	-0.251221	0.0304442	-1.6199	0.0135458	-1.0817	0.00238929
995.26	23.9932	24.2631	13.3055	13.3082	4.61781	4.43246	-0.254028	0.030438	-1.6199	0.013543	-1.0817	0.0023888
996.26	23.9982	24.2582	13.3083	13.3055	4.60703	4.43156	-0.262939	0.0304318	-1.61099	0.0135403	-1.07576	0.00238832
997.26	23.9833	24.2532	13.3005	13.3028	4.59718	4.43065	-0.271683	0.0304255	-1.60225	0.0135375	-1.07388	0.00238783
998.26	23.9787	24.2482	13.2947	13.3001	4.59718	4.42975	-0.27356	0.0304193	-1.59146	0.0135347	-1.07388	0.00238734
999.26	23.9649	24.2433	13.3036	13.2974	4.59718	4.42884	-0.300125	0.0304131	-1.60037	0.013532	-1.06029	0.00238685
1000.26	23.9424	24.2383	13.2947	13.2946	4.59125	4.42794	-0.324341	0.0304069	-1.59334	0.0135292	-1.06529	0.00238636
1001.26	23.919	24.2334	13.2859	13.2919	4.59218	4.42704	-0.337936	0.0304006	-1.57974	0.0135264	-1.06717	0.00238587
1002.26	23.9024	24.2285	13.2723	13.2892	4.58937	4.42613	-0.327148	0.0303944	-1.571	0.0135237	-1.07701	0.00238538
1003.26	23.8888	24.2235	13.2645	13.2865	4.59125	4.42523	-0.318405	0.0303882	-1.57193	0.0135209	-1.0817	0.0023849
1004.26	23.8869	24.2186	13.2645	13.2838	4.60422	4.42433	-0.316528	0.030382	-1.56912	0.0135181	-1.07576	0.00238441
1005.26	23.8977	24.2136	13.245	13.2811	4.61484	4.42342	-0.308716	0.0303758	-1.56319	0.0135154	-1.06497	0.00238392
1006.26	23.8888	24.2087	13.2392	13.2784	4.6089	4.42252	-0.296997	0.0303695	-1.56912	0.0135126	-1.06107	0.00238343
1007.26	23.8888	24.2037	13.2305	13.2757	4.6089	4.42162	-0.296997	0.0303633	-1.57193	0.0135098	-1.05826	0.00238294
1008.26	23.8899	24.1988	13.2137	13.273	4.60297	4.42072	-0.299805	0.0303571	-1.57693	0.0135071	-1.06998	0.00238246
1009.26	23.8869	24.1939	13.2091	13.2703	4.59531	4.41981	-0.289963	0.0303509	-1.58865	0.0135043	-1.06998	0.00238197
1010.26	23.8829	24.1889	13.202	13.2676	4.58344	4.41891	-0.28215	0.0303447	-1.60037	0.0135015	-1.08357	0.00238148
1011.26	23.8752	24.184	13.2031	13.2649	4.58046	4.41801	-0.288086	0.0303385	-1.60818	0.0134988	-1.09341	0.00238099
1012.26	23.8693	24.179	13.1942	13.2622	4.57765	4.41711	-0.270432	0.0303323	-1.59334	0.013496	-1.09341	0.00238051
1013.26	23.8646	24.1741	13.1775	13.2595	4.57765	4.41621	-0.265747	0.0303261	-1.58865	0.0134932	-1.09341	0.00238002
1014.26	23.8665	24.1692	13.1825	13.2568	4.57875	4.41531	-0.254028	0.0303199	-1.58865	0.0134905	-1.09232	0.00237953
1015.26	23.8408	24.1642	13.1766	13.2541	4.57578	4.4144	-0.261063	0.0303137	-1.60037	0.0134877	-1.0817	0.00237904
1016.26	23.8391	24.1593	13.1658	13.2514	4.58656	4.4135	-0.262939	0.0303074	-1.58865	0.013485	-1.07889	0.00237856
1017.26	23.8302	24.1544	13.1658	13.2487	4.57578	4.4126	-0.257935	0.0303012	-1.6035	0.0134822	-1.0817	0.00237807
1018.26	23.8244	24.1494	13.1648	13.246	4.56703	4.4117	-0.271683	0.030295	-1.6171	0.0134794	-1.0817	0.00237758
1019.26	23.8185	24.1445	13.1689	13.2433	4.55812	4.4108	-0.285278	0.0302888	-1.6199	0.0134767	-1.08873	0.0023771
1020.26	23.8126	24.1396	13.1797	13.2406	4.56703	4.4099	-0.270432	0.0302826	-1.6199	0.0134739	-1.10233	0.00237661
1021.26	23.8018	24.1347	13.1836	13.2379	4.56796	4.409	-0.270432	0.0302764	-1.61099	0.0134712	-1.10513	0.00237612
1022.26	23.7883	24.1297	13.1806	13.2352	4.56984	4.4081	-0.265747	0.0302702	-1.60037	0.0134684	-1.09935	0.00237564
1023.26	23.7716	24.1248	13.163	13.2325	4.58469	4.4072	-0.265747	0.0302641	-1.60225	0.0134656	-1.08951	0.00237515
1024.26	23.7627	24.1199	13.1602	13.2298	4.58937	4.4063	-0.246216	0.0302579	-1.5985	0.0134629	-1.11014	0.00237467
1025.26	23.7482	24.1149	13.1611	13.2271	4.58656	4.4054	-0.246216	0.0302517	-1.60818	0.0134601	-1.11295	0.00237418
1026.26	23.7404	24.11	13.1453	13.2244	4.58749	4.40451	-0.262939	0.0302455	-1.60818	0.0134574	-1.10826	0.00237369
1027.26	23.7376	24.1051	13.1356	13.2217	4.58937	4.40361	-0.26387	0.0302393	-1.60225	0.0134546	-1.10716	0.00237321
1028.26	23.7451	24.1002	13.1416	13.219	4.58656	4.40271	-0.27356	0.0302331	-1.59146	0.0134519	-1.11014	0.00237272
1029.26	23.7315	24.0953	13.1328	13.2163	4.58937	4.40181	-0.279343	0.0302269	-1.58865	0.0134491	-1.10123	0.00237224
1030.26	23.7255	24.0903	13.1239	13.2136	4.58156	4.40091	-0.276367	0.0302207	-1.56599	0.0134464	-1.09341	0.00237175
1031.26	23.7138	24.0854	13.127	13.2109	4.56984	4.40001	-0.27356	0.0302145	-1.53787	0.0134436	-1.0817	0.00237127
1032.26	23.6943	24.0805	13.1228	13.2082	4.56984	4.39912	-0.274658	0.0302083	-1.53787	0.0134409	-1.0817	0.00237078
1033.26	23.6669	24.0756	13.12	13.2055	4.55031	4.39822	-0.268555	0.0302022	-1.53787	0.0134381	-1.07278	0.0023703
1034.26	23.6416	24.0707	13.1258	13.2028	4.55031	4.39732	-0.262939	0.030196	-1.54678	0.0134354	-1.07108	0.00236981
1035.26	23.6193	24.0658	13.1208	13.2001	4.54453	4.39642	-0.26387	0.0301898	-1.56725	0.0134326	-1.08873	0.00236933
1036.26	23.6165	24.0609	13.1267	13.1974	4.54047	4.39553	-0.265747	0.0301836	-1.58397	0.0134299	-1.0817	0.00236884
1037.26	23.6263	24.0559	13.118	13.1947	4.52968	4.39463	-0.259811	0.0301774	-1.60037	0.0134271	-1.07278	0.00236836
1038.26	23.6369	24.051	13.1161	13.1921	4.52094	4.39373	-0.249023	0.0301713	-1.58272	0.0134244	-1.07576	0.00236787
1039.26	23.6477	24.0461	13.1072	13.1894	4.50233	4.39283	-0.261063	0.0301651	-1.58678	0.0134216	-1.07388	0.00236739
1040.26	23.6565	24.0412	13.1133	13.1867	4.48781	4.39194	-0.27356	0.0301589	-1.59756	0.0134189	-1.07278	0.0023669
1041.26	23.6673	24.0363	13.1298	13.184	4.48	4.39104	-0.288406	0.0301528	-1.59146	0.0134161	-1.06404	0.00236642
1042.26	23.6552	24.0314	13.1239	13.1813	4.49484	4.39015	-0.302002	0.0301466	-1.58272	0.0134134	-1.05325	0.00236593
1043.26	23.6416	24.0265	13.1258	13.1786	4.49672	4.38925	-0.331375	0.0301404	-1.58678	0.0134106	-1.05045	0.00236545
1044.26	23.6329	24.0216	13.1239	13.1759	4.50546	4.38835	-0.344971	0.0301342	-1.60037	0.0134079	-1.03983	0.00236496
1045.26	23.631	24.0167	13.1239	13.1732	4.50734	4.38746	-0.36731	0.0301281	-1.60225	0.0134051	-1.04544	0.00236448
1046.26	23.6221	24.0118	13.1298	13.1706	4.5014	4.38656	-0.379028	0.0301219	-1.60037	0.0134024	-1.05936	0.002364
1047.26	23.6076	24.0069	13.1239	13.1679	4.4964	4.38567	-0.369034	0.0301157	-1.60318	0.0133997	-1.07388	0.00236351
1048.26	23.6076	24.002	13.1211	13.1652	4.4828	4.38477	-0.357468	0.0301096	-1.60818	0.0133969	-1.0681	0.00236303
1049.26	23.5997	23.9971	13.1103	13.1625	4.48	4.38388	-0.36731	0.0301034	-1.59334	0.0133942	-1.07889	0.00236255
1050.26	23.588	23.9922	13.1094	13.1598	4.48	4.38298	-0.355591	0.0300973	-1.58084	0.0133914	-1.0817	0.00236206
1051.26	23.5774	23.9873	13.0848	13.1571	4.48187	4.38209	-0.355591	0.0300911	-1.58084	0.0133887	-1.07388	0.00236158
1052.26	23.5802	23.9824	13.0731	13.1545	4.4828	4.38119	-0.33606	0.0300849	-1.56599	0.013386	-1.06216	0.00236109
1053.26	23.5744	23.9775	13.0564	13.1518	4.48187	4.3803	-0.350906	0.0300788	-1.54178	0.0133832	-1.05325	0.00236061
1054.26	23.5763	23.9726	13.0419	13.1491	4.46219	4.37941	-0.352783	0.0300726	-1.54178	0.0133805	-1.05623	0.00236013
1055.26	23.588	23.9677	13.0341	13.1464	4.45062	4.37851	-0.350906	0.0300665	-1.55663	0.0133777	-1.05325	0.00235965
1056.26	23.5969	23.9628	13.0223	13.1437	4.45155	4.37762	-0.353714	0.0300603	-1.54959	0.013375	-1.06998	0.00235916
1057.26	23.5908	23.9579	13.0223	13.1411	4.45766	4.37673	-0.352783	0.0300542	-1.5585	0.0133723	-1.06685	0.00235868
1058.26	23.5938	23.953	13.0223	13.1384	4.47531	4.37583	-0.377472	0.030048	-1.57616	0.0133695	-1.06998	0.0023582
1059.26	23.5997	23.9481	13.0223	13.1357	4.47719	4.37494	-0.395752	0.0300419	-1.59569	0.0133668	-1.07108	0.00235771
1060.26	23.5919	23.9432	13.043	13.133	4.47812	4.37405	-0.39856	0.0300357	-1.6035	0.0133641	-1.0817	0.00235723
1061.26	23.5654	23.9384	13.0447	13.1304	4.48891	4.37315	-0.39856	0.0300296	-1.60818	0.0133613	-1.07982	0.00235675
1062.26	23.5724	23.9335	13.0508	13.1277	4.49062	4.37226	-0.397461	0.0300234	-1.60037	0.0133586	-1.0817	0.00235627
1063.26	23.5635	23.9286	13.0653	13.125	4.48781	4.37137	-0.391525	0.0300173	-1.60037	0.0133558	-1.06998	0.00235578
1064.26	23.549	23.9237	13.0642	13.1223	4.48	4.37048	-0.371994	0.0300111	-1.60037	0.0133531	-1.05045	0.0023553
1065.26	23.5401	23.9188	13.0466	13.1197	4.48781	4.36959	-0.375122	0.030005	-1.60506	0.0133504	-1.05045	0.00235482
1066.26	23.5313	23.9139	13.0477	13.117	4.48781	4.36869	-0.366211	0.0299988	-1.58553	0.0133476	-1.03983	0.00235434
1067.26	23.5177	23.9091	13.0369	13.1143	4.48	4.3678	-0.376999	0.0299927	-1.59146	0.0133449	-1.04857	0.00235386
1068.26	23.4982	23.9042	13.0387	13.1116	4.46938	4.36691	-0.392776	0.0299866	-1.58272	0.0133422	-1.05936	0.00235337
1069.26	23.4904	23.8993	13.0251	13.109	4.46046	4.36602	-0.382935	0.0299804	-1.58365	0.0133395	-1.06216	0.00235289
1070.26	23.4963	23.8944	13.0047	13.1063	4.43983	4.36513	-0.391846	0.0299743	-1.56599	0.0133367	-1.07388	0.00235241
1071.26	23.4865	23.8895	12.9939	13.1036	4.43813	4.36424	-0.394653	0.0299682	-1.56912	0.013334	-1.0817	0.00235193
1072.26	23.4847	23.8847	12.9911	13.1009	4.42734	4.36335	-0.394653	0.029962	-1.57506	0.0133313	-1.0817	0.00235145
1073.26	23.4885	23.8798	13.0117	13.0983	4.43813	4.36246	-0.4095	0.0299559	-1.57803	0.0133285	-1.07388	0.00235097
1074.26	23.4904	23.8749	13.0056	13.0956	4.44875	4.36157	-0.414185	0.0299498	-1.58865	0.0133258	-1.06497	0.00235049
1075.26	23.4787	23.87	12.988	13.0929	4.46046	4.36068	-0.416992	0.0299436	-1.60928	0.0133231	-1.05045	0.00235
1076.26	23.4787	23.8652	12.9833	13.0903	4.46828	4.35979	-0.42778	0.0299375	-1.62584	0.0133204	-1.05936	0.00234952
1077.26	23.4787	23.8603	12.9716	13.0876	4.4828	4.3589	-0.436523	0.0299314	-1.62459	0.0133176	-1.06216	0.00234904
1078.26	23.4833	23.8554	12.9548	13.0849	4.48187	4.35801	-0.430588	0.0299252	-1.61678	0.0133149	-1.05325	0.00234856
1079.26	23.4833	23.8506	12.9492	13.0823	4.49062	4.35712	-0.439499	0.0299191	-1.60506	0.0133122	-1.07108	0.00234808
1080.26	23.4708	23.8457	12.9473	13.0796	4.48781	4.35623	-0.427628	0.029913	-1.59146	0.0133095	-1.07982	0.0023476
1081.26	23.4768	23.8408	12.9473	13.0769	4.48891	4.35534	-0.439499	0.0299069	-1.59756	0.0133067	-1.08951	0.00234712
1082.26	23.4727	23.8359	12.9562	13.0743	4.48703	4.35445	-0.430588	0.0299008	-1.58084	0.013304	-1.08357	0.00234664
1083.26	23.4619	23.8311	12.9531	13.0716	4.49171	4.35356	-0.416992	0.0298946	-1.58397	0.0133013	-1.08763	0.00234616
1084.26	23.4591	23.8262	12.9501	13.0689	4.49765	4.35267	-0.425903	0.0298885	-1.58084	0.0132986	-1.09061	0.00234568
1085.26	23.4563	23.8214	12.9442	13.0663	4.48781	4.35179	-0.425903	0.0298824	-1.60458	0.0132958	-1.09341	0.0023452
1086.26	23.4544	23.8165	12.9442	13.0636	4.47015	4.3509	-0.425903	0.0298763	-1.62584	0.0132931	-1.0817	0.00234472
1087.26	23.4474	23.8116	12.9461	13.061	4.45937	4.35001	-0.414185	0.0298702	-1.63943	0.0132904	-1.09061	0.00234424
1088.26	23.4232	23.8068	12.9442	13.0583	4.46828	4.34912	-0.423096	0.0298641	-1.64522	0.0132877	-1.08763	0.00234376
1089.26	23.4173	23.8019	12.9442	13.0556	4.45656	4.34824	-0.416992	0.0298579	-1.63443	0.013285	-1.08951	0.00234328
1090.26	23.4005	23.797	12.9423	13.053	4.44875	4.34735	-0.415283	0.0298518	-1.61099	0.0132822	-1.09529	0.0023428
1091.26	23.3888	23.7922	12.9442	13.0503	4.44875	4.34646	-0.406372	0.0298457	-1.59334	0.0132795	-1.10513	0.00234232
1092.26	23.381	23.7873	12.9325	13.0476	4.45187	4.34557	-0.421219	0.0298396	-1.56209	0.0132768	-1.11107	0.00234184
1093.26	23.3604	23.7825	12.9187	13.045	4.46234	4.34469	-0.425903	0.0298335	-1.53787	0.0132741	-1.09842	0.00234136
1094.26	23.3516	23.7776	12.8873	13.0423	4.46046	4.3438	-0.42012	0.0298274	-1.53006	0.0132714	-1.08873	0.00234088
1095.26	23.3302	23.7728	12.8934	13.0397	4.4664	4.34291	-0.423096	0.0298213	-1.54678	0.0132687	-1.08763	0.0023404
1096.26	23.3283	23.7679	12.8934	13.037	4.46828	4.34203	-0.434814	0.0298152	-1.56725	0.0132659	-1.09061	0.00233992
1097.26	23.3274	23.7631	12.9023	13.0344	4.46828	4.34114	-0.44075	0.0298091	-1.58585	0.0132632	-1.08279	0.00233945
1098.26	23.3166	23.7582	12.9141	13.0317	4.47015	4.34026	-0.443558	0.029803	-1.58865	0.0132605	-1.06497	0.00233897
1099.26	23.3274	23.7534	12.9111	13.029	4.47108	4.33937	-0.460281	0.0297969	-1.57193	0.0132578	-1.06216	0.00233849
1100.26	23.3244	23.7485	12.9219	13.0264	4.46515	4.33848	-0.462158	0.0297908	-1.5574	0.0132551	-1.06216	0.00233801
1101.26	23.3274	23.7437	12.9306	13.0237	4.46234	4.3376	-0.464966	0.0297847	-1.54366	0.0132524	-1.05045	0.00233753
1102.26	23.299	23.7388	12.9176	13.0211	4.48	4.33671	-0.476685	0.0297786	-1.53287	0.0132497	-1.05045	0.00233705
1103.26	23.2943	23.734	12.913	13.0184	4.49171	4.33583	-0.467773	0.0297725	-1.53006	0.0132469	-1.05045	0.00233657
1104.26	23.3079	23.7291	12.9012	13.0158	4.48593	4.33494	-0.45903	0.0297664	-1.51521	0.0132442	-1.06216	0.0023361
1105.26	23.2971	23.7243	12.9012	13.0131	4.49484	4.33406	-0.448242	0.0297603	-1.53006	0.0132415	-1.07388	0.00233562
1106.26	23.299	23.7194	12.8934	13.0105	4.48312	4.33317	-0.439499	0.0297542	-1.53006	0.0132388	-1.08279	0.00233514
1107.26	23.2872	23.7146	12.8739	13.0078	4.47719	4.33229	-0.416992	0.0297481	-1.53787	0.0132361	-1.0856	0.00233466
1108.26	23.2813	23.7098	12.8427	13.0052	4.4664	4.33141	-0.414185	0.029742	-1.54068	0.0132334	-1.0845	0.00233418
1109.26	23.2794	23.7049	12.838	13.0025	4.45766	4.33052	-0.423096	0.029736	-1.53787	0.0132307	-1.10123	0.00233371
1110.26	23.2599	23.7001	12.8398	12.9999	4.44875	4.32964	-0.437622	0.0297299	-1.5585	0.013228	-1.10233	0.00233323
1111.26	23.2669	23.6952	12.8348	12.9972	4.4203	4.32876	-0.437622	0.0297238	-1.54959	0.0132253	-1.09935	0.00233275
1112.26	23.2658	23.6904	12.8408	12.9946	4.4175	4.32787	-0.436523	0.0297177	-1.56131	0.0132226	-1.09529	0.00233227
1113.26	23.2688	23.6856	12.8516	12.9919	4.4175	4.32699	-0.445435	0.0297116	-1.57022	0.0132199	-1.09935	0.0023318
1114.26	23.2865	23.6807	12.8603	12.9893	4.42328	4.32611	-0.433716	0.0297055	-1.57896	0.0132171	-1.09529	0.00233132
1115.26	23.2705	23.6759	12.8562	12.9866	4.4214	4.32522	-0.42778	0.0296995	-1.57803	0.0132144	-1.09154	0.00233084
1116.26	23.2482	23.6711	12.8427	12.984	4.43515	4.32434	-0.40918	0.0296934	-1.56021	0.0132117	-1.08748	0.00233036
1117.26	23.2422	23.6662	12.8337	12.9813	4.43703	4.32346	-0.415283	0.0296873	-1.57225	0.013209	-1.0845	0.00232989
1118.26	23.2197	23.6614	12.8398	12.9787	4.44594	4.32258	-0.438873	0.0296812	-1.56912	0.0132063	-1.0817	0.00232941
1119.26	23.211	23.6566	12.8142	12.976	4.44093	4.32169	-0.45903	0.0296752	-1.55147	0.0132036	-1.0817	0.00232893
1120.26	23.1896	23.6517	12.8036	12.9734	4.44093	4.32081	-0.467773	0.0296691	-1.53287	0.0132009	-1.09654	0.00232846
1121.26	23.1955	23.6469	12.8125	12.9707	4.43813	4.31993	-0.484497	0.029663	-1.52303	0.0131982	-1.09341	0.00232798
1122.26	23.2063	23.6421	12.8291	12.9681	4.44093	4.31905	-0.504028	0.0296569	-1.51053	0.0131955	-1.09341	0.0023275
1123.26	23.2162	23.6373	12.825	12.9655	4.45859	4.31817	-0.498093	0.0296509	-1.50162	0.0131928	-1.09654	0.00232703
1124.26	23.2287	23.6324	12.8231	12.9628	4.46938	4.31729	-0.487305	0.0296448	-1.49287	0.0131901	-1.09842	0.00232655
1125.26	23.2197	23.6276	12.8231	12.9602	4.47812	4.3164	-0.473877	0.0296387	-1.491	0.0131874	-1.09341	0.00232608
1126.26	23.2032	23.6228	12.8348	12.9575	4.47719	4.31552	-0.474808	0.0296327	-1.48521	0.0131847	-1.07388	0.0023256
1127.26	23.1807	23.618	12.8348	12.9549	4.49171	4.31464	-0.464966	0.0296266	-1.5049	0.013182	-1.07388	0.00232512
1128.26	23.1602	23.6131	12.8408	12.9523	4.49953	4.31376	-0.473877	0.0296205	-1.50865	0.0131793	-1.06685	0.00232465
1129.26	23.1505	23.6083	12.832	12.9496	4.49062	4.31288	-0.467773	0.0296145	-1.50772	0.0131766	-1.07388	0.00232417
1130.26	23.1299	23.6035	12.8203	12.947	4.49359	4.312	-0.464966	0.0296084	-1.53709	0.0131739	-1.0817	0.0023237
1131.26	23.1282	23.5987	12.8017	12.9443	4.49171	4.31112	-0.45903	0.0296024	-1.54959	0.0131712	-1.07857	0.00232322
1132.26	23.1193	23.5939	12.793	12.9417	4.49062	4.31024	-0.457153	0.0295963	-1.54068	0.0131685	-1.0856	0.00232274
1133.26	23.1193	23.5891	12.7705	12.9391	4.48187	4.30936	-0.457153	0.0295902	-1.51834	0.0131658	-1.09935	0.00232227
1134.26	23.1174	23.5842	12.7528	12.9364	4.46046	4.30848	-0.445435	0.0295842	-1.50349	0.0131632	-1.09341	0.00232179
1135.26	23.1165	23.5794	12.75	12.9338	4.47812	4.3076	-0.452469	0.0295781	-1.49881	0.0131605	-1.09341	0.00232132
1136.26	23.1352	23.5746	12.7528	12.9312	4.48891	4.30672	-0.472	0.0295721	-1.48116	0.0131578	-1.06998	0.00232084
1137.26	23.1518	23.5698	12.7528	12.9285	4.48593	4.30585	-0.476685	0.029566	-1.45975	0.0131551	-1.07701	0.00232037
1138.26	23.1852	23.565	12.7528	12.9259	4.46828	4.30497	-0.470901	0.02956	-1.47147	0.0131524	-1.09061	0.00231989
1139.26	23.2133	23.5602	12.7528	12.9232	4.46547	4.30409	-0.464966	0.0295539	-1.47928	0.0131497	-1.07982	0.00231942
1140.26	23.2162	23.5554	12.7705	12.9206	4.47421	4.30321	-0.481689	0.0295479	-1.48521	0.013147	-1.0817	0.00231894
1141.26	23.2091	23.5506	12.7664	12.918	4.47609	4.30233	-0.484497	0.0295418	-1.48709	0.0131443	-1.08357	0.00231847
1142.26	23.1877	23.5458	12.7645	12.9153	4.46828	4.30145	-0.484497	0.0295358	-1.51944	0.0131416	-1.10123	0.002318
1143.26	23.1555	23.5409	12.7677	12.9127	4.46828	4.30058	-0.496216	0.0295297	-1.53006	0.0131389	-1.10403	0.00231752
1144.26	23.124	23.5361	12.7528	12.9101	4.47719	4.2997	-0.496216	0.0295237	-1.536	0.0131362	-1.08951	0.00231705
1145.26	23.1044	23.5313	12.7361	12.9075	4.46828	4.29882	-0.489182	0.0295176	-1.54678	0.0131335	-1.08357	0.00231657
1146.26	23.083	23.5265	12.7216	12.9048	4.45468	4.29794	-0.460754	0.0295116	-1.5524	0.0131309	-1.07982	0.0023161
1147.26	23.0654	23.5217	12.7188	12.9022	4.45483	4.29707	-0.4384	0.0295056	-1.54959	0.0131282	-1.06998	0.00231562
1148.26	23.0654	23.5169	12.7197	12.8996	4.45265	4.29619	-0.433716	0.0294995	-1.52303	0.0131255	-1.05045	0.00231515
1149.26	23.0536	23.5121	12.7039	12.8969	4.44093	4.29531	-0.424805	0.0294935	-1.51521	0.0131228	-1.05045	0.00231468
1150.26	23.0341	23.5073	12.7001	12.8943	4.44093	4.29444	-0.416061	0.0294875	-1.52115	0.0131201	-1.04451	0.0023142
1151.26	23.0294	23.5025	12.7109	12.8917	4.42921	4.29356	-0.399338	0.0294814	-1.52022	0.0131174	-1.04857	0.00231373
1152.26	23.0412	23.4977	12.7091	12.889	4.41249	4.29268	-0.394653	0.0294754	-1.52115	0.0131147	-1.05045	0.00231326
1153.26	23.0412	23.4929	12.7109	12.8864	4.39484	4.29181	-0.406372	0.0294693	-1.53787	0.0131121	-1.04451	0.00231278
1154.26	23.0354	23.4881	12.7255	12.8838	4.37843	4.29093	-0.406372	0.0294633	-1.5574	0.0131094	-1.05435	0.00231231
1155.26	23.0372	23.4833	12.7255	12.8812	4.37843	4.29006	-0.40918	0.0294573	-1.55147	0.0131067	-1.06029	0.00231184
1156.26	23.0383	23.4786	12.7314	12.8785	4.37062	4.28918	-0.408249	0.0294513	-1.56131	0.013104	-1.06216	0.00231136
1157.26	23.0099	23.4738	12.7333	12.8759	4.37656	4.28831	-0.424026	0.0294452	-1.56912	0.0131013	-1.05513	0.00231089
1158.26	22.9963	23.469	12.7216	12.8733	4.38625	4.28743	-0.425903	0.0294392	-1.58084	0.0130986	-1.04451	0.00231042
1159.26	22.9876	23.4642	12.7156	12.8707	4.38734	4.28656	-0.408249	0.0294332	-1.57974	0.013096	-1.04263	0.00230994
1160.26	22.9857	23.4594	12.697	12.868	4.37843	4.28568	-0.406372	0.0294272	-1.571	0.0130933	-1.04076	0.00230947
1161.26	22.9798	23.4546	12.6942	12.8654	4.36781	4.28481	-0.412308	0.0294211	-1.57193	0.0130906	-1.04263	0.002309
1162.26	22.9708	23.4498	12.6883	12.8628	4.36171	4.28393	-0.437927	0.0294151	-1.56912	0.0130879	-1.04263	0.00230852
1163.26	22.9885	23.445	12.6775	12.8602	4.34406	4.28306	-0.445435	0.0294091	-1.56912	0.0130852	-1.05748	0.00230805
1164.26	22.9787	23.4402	12.6658	12.8576	4.33937	4.28218	-0.445435	0.0294031	-1.56631	0.0130826	-1.05045	0.00230758
1165.26	22.9904	23.4355	12.663	12.8549	4.33046	4.28131	-0.445435	0.0293971	-1.55553	0.0130799	-1.06998	0.00230711
1166.26	22.9787	23.4307	12.6602	12.8523	4.33344	4.28044	-0.436523	0.029391	-1.54678	0.0130772	-1.07576	0.00230664
1167.26	22.9787	23.4259	12.663	12.8497	4.32265	4.27956	-0.433716	0.029385	-1.55553	0.0130745	-1.0845	0.00230616
1168.26	22.968	23.4211	12.6541	12.8471	4.32875	4.27869	-0.425903	0.029379	-1.56631	0.0130719	-1.0817	0.00230569
1169.26	22.9513	23.4163	12.6512	12.8445	4.32578	4.27782	-0.423096	0.029373	-1.56912	0.0130692	-1.09061	0.00230522
1170.26	22.9396	23.4115	12.663	12.8418	4.32484	4.27694	-0.425903	0.029367	-1.58678	0.0130665	-1.10513	0.00230475
1171.26	22.926	23.4068	12.6719	12.8392	4.33469	4.27607	-0.414185	0.029361	-1.59756	0.0130638	-1.11107	0.00230428
1172.26	22.9279	23.402	12.6676	12.8366	4.3425	4.2752	-0.429031	0.029355	-1.6199	0.0130612	-1.12967	0.0023038
1173.26	22.9368	23.3972	12.6434	12.834	4.32765	4.27433	-0.445435	0.029349	-1.62772	0.0130585	-1.11295	0.00230333
1174.26	22.9247	23.3924	12.6345	12.8314	4.33469	4.27345	-0.457153	0.0293429	-1.6199	0.0130558	-1.11295	0.00230286
1175.26	22.9318	23.3877	12.6169	12.8288	4.3425	4.27258	-0.456055	0.0293369	-1.62772	0.0130531	-1.10123	0.00230239
1176.26	22.9122	23.3829	12.5945	12.8261	4.34718	4.27171	-0.453247	0.0293309	-1.63052	0.0130505	-1.09341	0.00230192
1177.26	22.9005	23.3781	12.5759	12.8235	4.33937	4.27084	-0.447311	0.0293249	-1.64131	0.0130478	-1.09341	0.00230145
1178.26	22.8888	23.3733	12.5731	12.8209	4.33656	4.26997	-0.464966	0.0293189	-1.63943	0.0130451	-1.0845	0.00230098
1179.26	22.8799	23.3686	12.5583	12.8183	4.33656	4.26909	-0.456055	0.0293129	-1.63052	0.0130425	-1.0817	0.00230051
1180.26	22.8782	23.3638	12.5614	12.8157	4.33046	4.26822	-0.445435	0.0293069	-1.6335	0.0130398	-1.08951	0.00230003
1181.26	22.8615	23.359	12.5614	12.8131	4.32765	4.26735	-0.453247	0.0293009	-1.62584	0.0130371	-1.09529	0.00229956
1182.26	22.8544	23.3543	12.5703	12.8105	4.31984	4.26648	-0.462158	0.0292949	-1.60225	0.0130345	-1.10513	0.00229909
1183.26	22.8408	23.3495	12.5791	12.8079	4.33937	4.26561	-0.476685	0.0292889	-1.60037	0.0130318	-1.11107	0.00229862
1184.26	22.8302	23.3447	12.5809	12.8053	4.35109	4.26474	-0.467773	0.0292829	-1.57974	0.0130291	-1.11014	0.00229815
1185.26	22.8274	23.34	12.5809	12.8026	4.34999	4.26387	-0.464966	0.029277	-1.57693	0.0130265	-1.11295	0.00229768
1186.26	22.8213	23.3352	12.5731	12.8	4.35297	4.263	-0.466843	0.029271	-1.57693	0.0130238	-1.11295	0.00229721
1187.26	22.799	23.3304	12.5625	12.7974	4.34406	4.26213	-0.448242	0.029265	-1.58272	0.0130211	-1.10123	0.00229674
1188.26	22.7794	23.3257	12.5536	12.7948	4.33937	4.26126	-0.445435	0.029259	-1.58365	0.0130185	-1.09341	0.00229627
1189.26	22.7766	23.3209	12.5447	12.7922	4.33937	4.26039	-0.433716	0.029253	-1.55428	0.0130158	-1.0845	0.0022958
1190.26	22.7705	23.3162	12.5536	12.7896	4.34531	4.25952	-0.433716	0.029247	-1.56131	0.0130131	-1.0817	0.00229533
1191.26	22.7599	23.3114	12.5477	12.787	4.33656	4.25865	-0.433716	0.029241	-1.55428	0.0130105	-1.0817	0.00229486
1192.26	22.7571	23.3066	12.5458	12.7844	4.34641	4.25778	-0.448563	0.029235	-1.54959	0.0130078	-1.09654	0.00229439
1193.26	22.7658	23.3019	12.5564	12.7818	4.34828	4.25691	-0.454346	0.029229	-1.54068	0.0130051	-1.10123	0.00229392
1194.26	22.7826	23.2971	12.5614	12.7792	4.35109	4.25604	-0.45137	0.0292231	-1.53787	0.0130025	-1.11795	0.00229345
1195.26	22.7883	23.2924	12.5614	12.7766	4.33046	4.25518	-0.454346	0.0292171	-1.54678	0.0129998	-1.13248	0.00229298
1196.26	22.7943	23.2876	12.5614	12.774	4.32765	4.25431	-0.454346	0.0292111	-1.55663	0.0129972	-1.1442	0.00229251
1197.26	22.8079	23.2829	12.5614	12.7714	4.33656	4.25344	-0.45137	0.0292051	-1.54678	0.0129945	-1.1442	0.00229204
1198.26	22.7971	23.2781	12.5536	12.7688	4.35703	4.25257	-0.445435	0.0291991	-1.54771	0.0129918	-1.13248	0.00229158
1199.26	22.7883	23.2734	12.5419	12.7662	4.36469	4.2517	-0.453247	0.0291932	-1.54678	0.0129892	-1.13248	0.00229111
1200.26	22.7794	23.2686	12.5419	12.7636	4.36281	4.25084	-0.45903	0.0291872	-1.54771	0.0129865	-1.11888	0.00229064
1201.26	22.7627	23.2639	12.5508	12.761	4.36874	4.24997	-0.448242	0.0291812	-1.54678	0.0129839	-1.11795	0.00229017
1202.26	22.7451	23.2591	12.5251	12.7584	4.36469	4.2491	-0.445435	0.0291753	-1.54959	0.0129812	-1.11295	0.0022897
1203.26	22.7197	23.2544	12.5234	12.7558	4.35109	4.24823	-0.450119	0.0291693	-1.54959	0.0129785	-1.10123	0.00228923
1204.26	22.7169	23.2496	12.5205	12.7532	4.32156	4.24737	-0.464966	0.0291633	-1.56131	0.0129759	-1.0981	0.00228876
1205.26	22.711	23.2449	12.5177	12.7506	4.30812	4.2465	-0.476685	0.0291573	-1.56131	0.0129732	-1.08638	0.00228829
1206.26	22.7208	23.2401	12.5106	12.748	4.2975	4.24563	-0.476685	0.0291514	-1.5524	0.0129706	-1.0845	0.00228783
1207.26	22.7208	23.2354	12.4981	12.7454	4.30031	4.24477	-0.490433	0.0291454	-1.53194	0.0129679	-1.0817	0.00228736
1208.26	22.7268	23.2306	12.507	12.7428	4.28859	4.2439	-0.498093	0.0291394	-1.52115	0.0129653	-1.0817	0.00228689
1209.26	22.7347	23.2259	12.5028	12.7402	4.28859	4.24304	-0.487305	0.0291335	-1.52412	0.0129626	-1.09529	0.00228642
1210.26	22.7463	23.2211	12.5059	12.7376	4.30344	4.24217	-0.478561	0.0291275	-1.52225	0.01296	-1.09341	0.00228595
1211.26	22.7287	23.2164	12.5195	12.735	4.30812	4.2413	-0.461838	0.0291216	-1.52818	0.0129573	-1.09935	0.00228549
1212.26	22.7208	23.2117	12.5205	12.7324	4.30031	4.24044	-0.456055	0.0291156	-1.53787	0.0129547	-1.11014	0.00228502
1213.26	22.6974	23.2069	12.5313	12.7298	4.30922	4.23957	-0.464966	0.0291096	-1.54959	0.012952	-1.1306	0.00228455
1214.26	22.6927	23.2022	12.5251	12.7272	4.30624	4.23871	-0.464966	0.0291037	-1.56912	0.0129494	-1.14029	0.00228408
1215.26	22.6779	23.1975	12.5106	12.7246	4.30812	4.23784	-0.460281	0.0290977	-1.57803	0.0129467	-1.15201	0.00228362
1216.26	22.6673	23.1927	12.5223	12.722	4.31703	4.23698	-0.462158	0.0290918	-1.58084	0.0129441	-1.14607	0.00228315
1217.26	22.6701	23.188	12.5028	12.7194	4.30624	4.23611	-0.472	0.0290858	-1.58365	0.0129414	-1.12827	0.00228268
1218.26	22.6701	23.1833	12.5117	12.7168	4.31984	4.23525	-0.472	0.0290799	-1.58553	0.0129388	-1.11763	0.00228221
1219.26	22.6583	23.1785	12.5028	12.7142	4.32172	4.23438	-0.472	0.0290739	-1.59756	0.0129361	-1.08638	0.00228175
1220.26	22.6494	23.1738	12.5145	12.7116	4.32265	4.23352	-0.476685	0.029068	-1.60037	0.0129335	-1.07278	0.00228128
1221.26	22.6376	23.1691	12.5145	12.709	4.31984	4.23266	-0.485596	0.029062	-1.5985	0.0129308	-1.06404	0.00228081
1222.26	22.6104	23.1643	12.495	12.7064	4.31281	4.23179	-0.496216	0.0290561	-1.6035	0.0129282	-1.0681	0.00228035
1223.26	22.6087	23.1596	12.4892	12.7039	4.30219	4.23093	-0.487305	0.0290501	-1.60928	0.0129255	-1.07108	0.00227988
1224.26	22.5997	23.1549	12.5	12.7013	4.29422	4.23007	-0.49028	0.0290442	-1.59569	0.0129229	-1.07701	0.00227941
1225.26	22.5908	23.1501	12.5294	12.6987	4.28265	4.2292	-0.51387	0.0290382	-1.59569	0.0129202	-1.10233	0.00227895
1226.26	22.588	23.1454	12.543	12.6961	4.28078	4.22834	-0.515747	0.0290323	-1.58084	0.0129176	-1.09935	0.00227848
1227.26	22.588	23.1407	12.5517	12.6935	4.28078	4.22748	-0.515747	0.0290263	-1.58084	0.0129149	-1.09061	0.00227801
1228.26	22.5951	23.136	12.5614	12.6909	4.26906	4.22661	-0.515747	0.0290204	-1.59146	0.0129123	-1.07982	0.00227755
1229.26	22.5969	23.1313	12.5731	12.6883	4.26906	4.22575	-0.515747	0.0290145	-1.59647	0.0129097	-1.06216	0.00227708
1230.26	22.6057	23.1265	12.5583	12.6857	4.26906	4.22489	-0.515747	0.0290085	-1.60225	0.012907	-1.05936	0.00227661
1231.26	22.6076	23.1218	12.5477	12.6832	4.26906	4.22403	-0.504028	0.0290026	-1.59927	0.0129044	-1.06216	0.00227615
1232.26	22.6087	23.1171	12.5163	12.6806	4.25233	4.22317	-0.49028	0.0289966	-1.60538	0.0129017	-1.06029	0.00227568
1233.26	22.6174	23.1124	12.4958	12.678	4.23187	4.2223	-0.488403	0.0289907	-1.60037	0.0128991	-1.07108	0.00227522
1234.26	22.6133	23.1077	12.488	12.6754	4.24171	4.22144	-0.488403	0.0289848	-1.59459	0.0128965	-1.07701	0.00227475
1235.26	22.5966	23.1029	12.4773	12.6728	4.24171	4.22058	-0.476685	0.0289788	-1.59053	0.0128938	-1.0817	0.00227429
1236.26	22.583	23.0982	12.4666	12.6702	4.24765	4.21972	-0.488403	0.0289729	-1.58865	0.0128912	-1.08482	0.00227382
1237.26	22.5774	23.0935	12.4567	12.6677	4.24953	4.21886	-0.488403	0.028967	-1.60037	0.0128885	-1.09842	0.00227335
1238.26	22.5607	23.0888	12.4489	12.6651	4.25266	4.218	-0.487305	0.0289611	-1.59146	0.0128859	-1.11888	0.00227289
1239.26	22.5549	23.0841	12.452	12.6625	4.27797	4.21714	-0.493408	0.0289551	-1.58865	0.0128833	-1.12654	0.00227242
1240.26	22.5579	23.0794	12.4442	12.6599	4.29562	4.21628	-0.479492	0.0289492	-1.59178	0.0128806	-1.12045	0.00227196
1241.26	22.5549	23.0747	12.4353	12.6573	4.2975	4.21541	-0.484497	0.0289433	-1.59756	0.012878	-1.11763	0.00227149
1242.26	22.5521	23.0699	12.4461	12.6548	4.28671	4.21455	-0.493408	0.0289374	-1.60928	0.0128754	-1.10591	0.00227103
1243.26	22.5657	23.0652	12.447	12.6522	4.28578	4.21369	-0.507935	0.0289314	-1.61803	0.0128727	-1.09232	0.00227056
1244.26	22.5607	23.0605	12.452	12.6496	4.28671	4.21283	-0.51387	0.0289255	-1.62178	0.0128701	-1.06998	0.0022701
1245.26	22.5607	23.0558	12.4637	12.647	4.26312	4.21198	-0.517624	0.0289196	-1.62271	0.0128674	-1.07889	0.00226963
1246.26	22.5341	23.0511	12.4656	12.6444	4.24171	4.21112	-0.521683	0.0289137	-1.60397	0.0128648	-1.08873	0.00226917
1247.26	22.5057	23.0464	12.4548	12.6419	4.23	4.21026	-0.524658	0.0289077	-1.60225	0.0128622	-1.09654	0.00226871
1248.26	22.4922	23.0417	12.452	12.6393	4.24765	4.2094	-0.518555	0.0289018	-1.57974	0.0128595	-1.11607	0.00226824
1249.26	22.4708	23.037	12.4442	12.6367	4.24953	4.20854	-0.52356	0.0288959	-1.57693	0.0128569	-1.12967	0.00226778
1250.26	22.4591	23.0323	12.4353	12.6341	4.24359	4.20768	-0.509811	0.02889	-1.5574	0.0128543	-1.1442	0.00226731
1251.26	22.4572	23.0276	12.4148	12.6316	4.24062	4.20682	-0.499023	0.0288841	-1.54959	0.0128517	-1.15013	0.00226685
1252.26	22.4485	23.0229	12.4052	12.629	4.23781	4.20596	-0.504028	0.0288782	-1.53787	0.012849	-1.15201	0.00226638
1253.26	22.4662	23.0182	12.3934	12.6264	4.24953	4.2051	-0.495117	0.0288723	-1.54491	0.0128464	-1.1656	0.00226592
1254.26	22.4846	23.0135	12.3934	12.6238	4.23781	4.20425	-0.501221	0.0288664	-1.55272	0.0128438	-1.16263	0.00226546
1255.26	22.4954	23.0088	12.3934	12.6213	4.24359	4.20339	-0.504028	0.0288605	-1.5674	0.0128411	-1.17154	0.00226499
1256.26	22.501	23.0041	12.3934	12.6187	4.24171	4.20253	-0.512939	0.0288545	-1.59569	0.0128385	-1.17154	0.00226453
1257.26	22.506	22.9994	12.3728	12.6161	4.23	4.20167	-0.518555	0.0288486	-1.61522	0.0128359	-1.16841	0.00226407
1258.26	22.4982	22.9947	12.3711	12.6136	4.23	4.20081	-0.514648	0.0288427	-1.62584	0.0128333	-1.16263	0.0022636
1259.26	22.4805	22.99	12.3739	12.611	4.22812	4.19996	-0.517624	0.0288368	-1.64725	0.0128306	-1.15388	0.00226314
1260.26	22.4708	22.9853	12.365	12.6084	4.21828	4.1991	-0.489182	0.0288309	-1.6324	0.012828	-1.13248	0.00226268
1261.26	22.4591	22.9806	12.3594	12.6058	4.20656	4.19824	-0.476685	0.028825	-1.63943	0.0128254	-1.0981	0.00226221
1262.26	22.4396	22.9759	12.3544	12.6033	4.19281	4.19739	-0.457153	0.0288191	-1.6324	0.0128227	-1.0817	0.00226175
1263.26	22.4111	22.9713	12.3603	12.6007	4.19093	4.19653	-0.44075	0.0288132	-1.63943	0.0128201	-1.0681	0.00226129
1264.26	22.4024	22.9666	12.3594	12.5981	4.17734	4.19567	-0.425903	0.0288073	-1.6335	0.0128175	-1.05045	0.00226082
1265.26	22.3799	22.9619	12.3622	12.5956	4.18813	4.19482	-0.431839	0.0288014	-1.63162	0.0128149	-1.03873	0.00226036
1266.26	22.3633	22.9572	12.3544	12.593	4.20578	4.19396	-0.433716	0.0287955	-1.63756	0.0128123	-1.04764	0.0022599
1267.26	22.3419	22.9525	12.3544	12.5904	4.22531	4.19311	-0.439499	0.0287896	-1.62881	0.0128096	-1.05045	0.00225944
1268.26	22.351	22.9478	12.3633	12.5879	4.24484	4.19225	-0.457153	0.0287838	-1.63162	0.012807	-1.05045	0.00225897
1269.26	22.3735	22.9431	12.3661	12.5853	4.24953	4.19139	-0.467773	0.0287779	-1.6199	0.0128044	-1.05325	0.00225851
1270.26	22.3841	22.9385	12.3483	12.5827	4.24953	4.19054	-0.466843	0.028772	-1.6199	0.0128018	-1.07108	0.00225805
1271.26	22.4037	22.9338	12.3398	12.5802	4.23781	4.18968	-0.476685	0.0287661	-1.63756	0.0127991	-1.07701	0.00225759
1272.26	22.4173	22.9291	12.3427	12.5776	4.22406	4.18883	-0.491531	0.0287602	-1.62772	0.0127965	-1.0817	0.00225713
1273.26	22.4111	22.9244	12.3438	12.575	4.2164	4.18797	-0.502151	0.0287543	-1.62772	0.0127939	-1.09341	0.00225666
1274.26	22.3966	22.9197	12.3348	12.5725	4.21938	4.18712	-0.520752	0.0287484	-1.62178	0.0127913	-1.0817	0.0022562
1275.26	22.3829	22.9151	12.3212	12.5699	4.21046	4.18627	-0.538406	0.0287425	-1.63756	0.0127887	-1.0817	0.00225574
1276.26	22.3526	22.9104	12.338	12.5674	4.2164	4.18541	-0.552002	0.0287367	-1.63943	0.0127861	-1.06998	0.00225528
1277.26	22.338	22.9057	12.332	12.5648	4.20656	4.18456	-0.545898	0.0287308	-1.64412	0.0127834	-1.06107	0.00225482
1278.26	22.338	22.901	12.3291	12.5622	4.19875	4.1837	-0.539963	0.0287249	-1.6324	0.0127808	-1.05826	0.00225436
1279.26	22.3469	22.8964	12.332	12.5597	4.20656	4.18285	-0.511536	0.028719	-1.62459	0.0127782	-1.05936	0.00225389
1280.26	22.333	22.8917	12.3142	12.5571	4.21828	4.182	-0.502777	0.0287131	-1.62584	0.0127756	-1.06216	0.00225343
1281.26	22.3154	22.887	12.3055	12.5546	4.21234	4.18114	-0.481369	0.0287073	-1.61287	0.012773	-1.06529	0.00225297
1282.26	22.3079	22.8823	12.3017	12.552	4.21327	4.18029	-0.459961	0.0287014	-1.6199	0.0127704	-1.06998	0.00225251
1283.26	22.3029	22.8777	12.3114	12.5494	4.19875	4.17944	-0.464966	0.0286955	-1.6171	0.0127677	-1.06404	0.00225205
1284.26	22.2912	22.873	12.3125	12.5469	4.21046	4.17858	-0.464966	0.0286896	-1.6199	0.0127651	-1.05325	0.00225159
1285.26	22.2776	22.8683	12.3064	12.5443	4.21828	4.17773	-0.473877	0.0286838	-1.61678	0.0127625	-1.04153	0.00225113
1286.26	22.2826	22.8637	12.2919	12.5418	4.19875	4.17688	-0.488403	0.0286779	-1.60506	0.0127599	-1.03279	0.00225067
1287.26	22.2962	22.859	12.2919	12.5392	4.19594	4.17603	-0.487305	0.028672	-1.59146	0.0127573	-1.03091	0.00225021
1288.26	22.3049	22.8543	12.2859	12.5367	4.19687	4.17517	-0.481369	0.0286662	-1.58865	0.0127547	-1.03091	0.00224975
1289.26	22.3157	22.8497	12.2723	12.5341	4.21547	4.17432	-0.484497	0.0286603	-1.60225	0.0127521	-1.0231	0.00224928
1290.26	22.3166	22.845	12.2841	12.5315	4.23	4.17347	-0.511063	0.0286544	-1.59146	0.0127495	-1.0231	0.00224882
1291.26	22.3068	22.8403	12.2751	12.529	4.21828	4.17262	-0.518555	0.0286486	-1.60928	0.0127469	-0.997787	0.00224836
1292.26	22.3157	22.8357	12.2723	12.5264	4.23	4.17177	-0.524658	0.0286427	-1.62584	0.0127443	-1.00858	0.0022479
1293.26	22.3107	22.831	12.2723	12.5239	4.23	4.17091	-0.542313	0.0286368	-1.62772	0.0127416	-0.994659	0.00224744
1294.26	22.3138	22.8263	12.2664	12.5213	4.24171	4.17006	-0.550125	0.028631	-1.62881	0.012739	-0.989044	0.00224698
1295.26	22.3185	22.8217	12.2762	12.5188	4.23	4.16921	-0.548874	0.0286251	-1.62271	0.0127364	-0.989044	0.00224652
1296.26	22.3157	22.817	12.2751	12.5162	4.21828	4.16836	-0.518555	0.0286193	-1.6199	0.0127338	-0.991852	0.00224606
1297.26	22.3096	22.8124	12.2813	12.5137	4.20937	4.16751	-0.496216	0.0286134	-1.61397	0.0127312	-1.00357	0.0022456
1298.26	22.3008	22.8077	12.29	12.5111	4.21828	4.16666	-0.476685	0.0286075	-1.6199	0.0127286	-1.00951	0.00224514
1299.26	22.2901	22.8031	12.2919	12.5086	4.23	4.16581	-0.453247	0.0286017	-1.63162	0.012726	-1.01138	0.00224469
1300.26	22.2724	22.7984	12.2841	12.506	4.22296	4.16496	-0.433716	0.0285958	-1.63335	0.0127234	-1.02623	0.00224423
1301.26	22.2599	22.7938	12.2859	12.5035	4.22296	4.16411	-0.429031	0.02859	-1.6335	0.0127208	-1.03983	0.00224377
1302.26	22.2451	22.7891	12.2841	12.5009	4.21515	4.16326	-0.434814	0.0285841	-1.6199	0.0127182	-1.04263	0.00224331
1303.26	22.2463	22.7844	12.2751	12.4984	4.21828	4.16241	-0.44075	0.0285783	-1.6199	0.0127156	-1.03091	0.00224285
1304.26	22.2454	22.7798	12.2859	12.4958	4.21828	4.16156	-0.457153	0.0285724	-1.60818	0.012713	-1.03091	0.00224239
1305.26	22.2552	22.7751	12.2841	12.4933	4.21046	4.16071	-0.457153	0.0285666	-1.58865	0.0127104	-1.03091	0.00224193
1306.26	22.263	22.7705	12.29	12.4907	4.23421	4.15986	-0.464966	0.0285607	-1.6035	0.0127078	-1.022	0.00224147
1307.26	22.2688	22.7659	12.2919	12.4882	4.22812	4.15901	-0.476685	0.0285549	-1.62303	0.0127052	-1.01326	0.00224101
1308.26	22.2599	22.7612	12.2919	12.4857	4.21828	4.15817	-0.484497	0.028549	-1.63663	0.0127026	-1.00951	0.00224055
1309.26	22.2404	22.7566	12.2841	12.4831	4.21046	4.15732	-0.475586	0.0285432	-1.64537	0.0127	-1.02029	0.0022401
1310.26	22.2346	22.7519	12.2734	12.4806	4.19875	4.15647	-0.484497	0.0285374	-1.65616	0.0126974	-1.01138	0.00223964
1311.26	22.2138	22.7473	12.2645	12.478	4.17218	4.15562	-0.478561	0.0285315	-1.67068	0.0126948	-1.00357	0.00223918
1312.26	22.2169	22.7426	12.2509	12.4755	4.14484	4.15477	-0.484497	0.0285257	-1.66177	0.0126922	-0.997787	0.00223872
1313.26	22.2169	22.738	12.2422	12.4729	4.14796	4.15392	-0.487305	0.0285198	-1.65303	0.0126896	-1.00858	0.00223826
1314.26	22.2169	22.7333	12.2481	12.4704	4.1539	4.15308	-0.484497	0.028514	-1.65005	0.012687	-1.00951	0.0022378
1315.26	22.2227	22.7287	12.2528	12.4679	4.15578	4.15223	-0.484497	0.0285082	-1.64412	0.0126844	-1.02919	0.00223735
1316.26	22.2236	22.7241	12.2528	12.4653	4.14984	4.15138	-0.493408	0.0285023	-1.64224	0.0126818	-1.02904	0.00223689
1317.26	22.2138	22.7194	12.2528	12.4628	4.14609	4.15053	-0.511063	0.0284965	-1.6335	0.0126792	-1.03983	0.00223643
1318.26	22.2013	22.7148	12.2634	12.4602	4.14203	4.14969	-0.515747	0.0284907	-1.63162	0.0126766	-1.04967	0.00223597
1319.26	22.1955	22.7102	12.2742	12.4577	4.12656	4.14884	-0.533401	0.0284848	-1.62271	0.012674	-1.0692	0.00223551
1320.26	22.1868	22.7055	12.2692	12.4552	4.11671	4.14799	-0.535278	0.028479	-1.6199	0.0126714	-1.07108	0.00223506
1321.26	22.1849	22.7009	12.2556	12.4526	4.12563	4.14715	-0.552002	0.0284732	-1.62772	0.0126688	-1.07388	0.0022346
1322.26	22.179	22.6962	12.2497	12.4501	4.12843	4.1463	-0.545898	0.0284674	-1.6335	0.0126662	-1.07982	0.00223414
1323.26	22.1682	22.6916	12.2361	12.4475	4.12062	4.14546	-0.552002	0.0284615	-1.64537	0.0126636	-1.09654	0.00223368
1324.26	22.179	22.687	12.2156	12.445	4.13734	4.14461	-0.555908	0.0284557	-1.63943	0.012661	-1.10123	0.00223323
1325.26	22.1747	22.6824	12.202	12.4425	4.14296	4.14376	-0.546997	0.0284499	-1.64835	0.0126585	-1.10123	0.00223277
1326.26	22.1701	22.6777	12.1942	12.4399	4.14796	4.14292	-0.546997	0.0284441	-1.65709	0.0126559	-1.10123	0.00223231
1327.26	22.1622	22.6731	12.1942	12.4374	4.14015	4.14207	-0.538086	0.0284382	-1.64725	0.0126533	-1.10123	0.00223186
1328.26	22.1447	22.6685	12.202	12.4349	4.13734	4.14123	-0.546997	0.0284324	-1.63943	0.0126507	-1.10123	0.0022314
1329.26	22.1555	22.6638	12.1942	12.4323	4.13828	4.14038	-0.538086	0.0284266	-1.64835	0.0126481	-1.09529	0.00223094
1330.26	22.1494	22.6592	12.208	12.4298	4.14015	4.13954	-0.529343	0.0284208	-1.66006	0.0126455	-1.09622	0.00223049
1331.26	22.1329	22.6546	12.2109	12.4273	4.1225	4.13869	-0.535278	0.028415	-1.65709	0.0126429	-1.07576	0.00223003
1332.26	22.1115	22.65	12.2137	12.4247	4.12343	4.13785	-0.535278	0.0284091	-1.64256	0.0126403	-1.0681	0.00222957
1333.26	22.1057	22.6453	12.2137	12.4222	4.12843	4.137	-0.535278	0.0284033	-1.65616	0.0126377	-1.06216	0.00222912
1334.26	22.0969	22.6407	12.2227	12.4197	4.13312	4.13616	-0.535278	0.0283975	-1.64537	0.0126352	-1.05154	0.00222866
1335.26	22.0904	22.6361	12.2403	12.4171	4.11952	4.13532	-0.538086	0.0283917	-1.64131	0.0126326	-1.04263	0.0022282
1336.26	22.104	22.6315	12.2392	12.4146	4.11671	4.13447	-0.552002	0.0283859	-1.64224	0.01263	-1.04076	0.00222775
1337.26	22.1068	22.6269	12.2411	12.4121	4.10297	4.13363	-0.572464	0.0283801	-1.65303	0.0126274	-1.03091	0.00222729
1338.26	22.1115	22.6222	12.2411	12.4095	4.10109	4.13278	-0.582153	0.0283743	-1.64412	0.0126248	-1.02498	0.00222684
1339.26	22.0997	22.6176	12.2411	12.407	4.10109	4.13194	-0.576218	0.0283685	-1.63052	0.0126222	-1.02591	0.00222638
1340.26	22.1057	22.613	12.2262	12.4045	4.09218	4.1311	-0.577148	0.0283627	-1.62772	0.0126196	-1.03091	0.00222593
1341.26	22.1076	22.6084	12.2067	12.402	4.08344	4.13025	-0.580124	0.0283569	-1.62881	0.0126171	-1.04263	0.00222547
1342.26	22.1076	22.6038	12.2048	12.3994	4.08749	4.12941	-0.5634	0.028351	-1.60318	0.0126145	-1.04263	0.00222501
1343.26	22.0969	22.5992	12.1872	12.3969	4.09718	4.12857	-0.543869	0.0283452	-1.58553	0.0126119	-1.05154	0.00222456
1344.26	22.0969	22.5945	12.1825	12.3944	4.1089	4.12773	-0.530273	0.0283394	-1.60037	0.0126093	-1.05435	0.0022241
1345.26	22.0979	22.5899	12.1648	12.3919	4.1089	4.12688	-0.535278	0.0283336	-1.61678	0.0126067	-1.06029	0.00222365
1346.26	22.088	22.5853	12.1552	12.3893	4.11671	4.12604	-0.535278	0.0283278	-1.63162	0.0126042	-1.06404	0.00222319
1347.26	22.0938	22.5807	12.17	12.3868	4.14906	4.1252	-0.527466	0.028322	-1.64537	0.0126016	-1.05325	0.00222274
1348.26	22.0919	22.5761	12.1689	12.3843	4.15077	4.12436	-0.515747	0.0283163	-1.65897	0.012599	-1.04263	0.00222228
1349.26	22.0682	22.5715	12.1691	12.3818	4.15688	4.12352	-0.511063	0.0283105	-1.64835	0.0125964	-1.04451	0.00222183
1350.26	22.0401	22.5669	12.163	12.3792	4.15187	4.12267	-0.530594	0.0283047	-1.65709	0.0125938	-1.05325	0.00222137
1351.26	22.0294	22.5623	12.17	12.3767	4.155	4.12183	-0.524658	0.0282989	-1.65616	0.0125913	-1.05325	0.00222092
1352.26	22.0462	22.5577	12.1806	12.3742	4.15968	4.12099	-0.515747	0.0282931	-1.65005	0.0125887	-1.05045	0.00222046
1353.26	22.0401	22.5531	12.1797	12.3717	4.14015	4.12015	-0.502151	0.0282873	-1.6335	0.0125861	-1.05623	0.00222001
1354.26	22.0372	22.5485	12.1942	12.3691	4.13437	4.11931	-0.504028	0.0282815	-1.64537	0.0125835	-1.05904	0.00221956
1355.26	22.0579	22.5439	12.1825	12.3666	4.13625	4.11847	-0.486374	0.0282757	-1.64131	0.012581	-1.05435	0.0022191
1356.26	22.0666	22.5393	12.1942	12.3641	4.14203	4.11763	-0.467773	0.0282699	-1.63943	0.0125784	-1.06216	0.00221865
1357.26	22.0508	22.5347	12.1942	12.3616	4.13124	4.11679	-0.462158	0.0282641	-1.63943	0.0125758	-1.0681	0.00221819
1358.26	22.0294	22.5301	12.1825	12.3591	4.12843	4.11595	-0.456055	0.0282583	-1.63943	0.0125732	-1.07108	0.00221774
1359.26	22.0099	22.5255	12.1825	12.3565	4.13625	4.11511	-0.464966	0.0282526	-1.65115	0.0125707	-1.07701	0.00221729
1360.26	21.9982	22.5209	12.163	12.354	4.14516	4.11427	-0.473877	0.0282468	-1.63943	0.0125681	-1.11716	0.00221683
1361.26	21.9951	22.5163	12.1462	12.3515	4.14609	4.11343	-0.467773	0.028241	-1.63943	0.0125655	-1.12466	0.00221638
1362.26	21.9815	22.5117	12.1375	12.349	4.14624	4.11259	-0.464966	0.0282352	-1.63162	0.0125629	-1.11888	0.00221592
1363.26	21.9844	22.5071	12.115	12.3465	4.155	4.11175	-0.464966	0.0282294	-1.6199	0.0125604	-1.11014	0.00221547
1364.26	21.9815	22.5025	12.0973	12.344	4.155	4.11091	-0.472778	0.0282237	-1.6199	0.0125578	-1.10123	0.00221502
1365.26	21.9904	22.4979	12.07	12.3414	4.15781	4.11007	-0.481689	0.0282179	-1.59334	0.0125552	-1.09341	0.00221456
1366.26	21.9982	22.4933	12.0642	12.3389	4.14203	4.10923	-0.490433	0.0282121	-1.57193	0.0125527	-1.07701	0.00221411
1367.26	21.9876	22.4887	12.0625	12.3364	4.14015	4.1084	-0.512939	0.0282063	-1.56319	0.0125501	-1.09935	0.00221366
1368.26	21.9885	22.4841	12.0684	12.3339	4.11952	4.10756	-0.511063	0.0282006	-1.5524	0.0125475	-1.10123	0.0022132
1369.26	21.9787	22.4795	12.0997	12.3314	4.11359	4.10672	-0.530594	0.0281948	-1.53474	0.012545	-1.1031	0.00221275
1370.26	21.9415	22.4749	12.1044	12.3289	4.12062	4.10588	-0.544189	0.028189	-1.53006	0.0125424	-1.10591	0.0022123
1371.26	21.926	22.4704	12.1075	12.3264	4.1225	4.10504	-0.546997	0.0281833	-1.53006	0.0125398	-1.10403	0.00221185
1372.26	21.9349	22.4658	12.1258	12.3238	4.12656	4.10421	-0.526367	0.0281775	-1.53897	0.0125373	-1.0981	0.00221139
1373.26	21.9368	22.4612	12.1267	12.3213	4.1089	4.10337	-0.515747	0.0281717	-1.54771	0.0125347	-1.07576	0.00221094
1374.26	21.9279	22.4566	12.1169	12.3188	4.11781	4.10253	-0.517624	0.028166	-1.53006	0.0125321	-1.09154	0.00221049
1375.26	21.9279	22.452	12.115	12.3163	4.10109	4.10169	-0.509659	0.0281602	-1.53006	0.0125296	-1.10123	0.00221004
1376.26	21.9307	22.4474	12.1062	12.3138	4.09531	4.10086	-0.498093	0.0281544	-1.53787	0.012527	-1.11014	0.00220958
1377.26	21.9102	22.4429	12.0973	12.3113	4.07875	4.10002	-0.484497	0.0281487	-1.54959	0.0125244	-1.11107	0.00220913
1378.26	21.8799	22.4383	12.0837	12.3088	4.07578	4.09918	-0.484497	0.0281429	-1.54256	0.0125219	-1.12076	0.00220868
1379.26	21.8633	22.4337	12.0661	12.3063	4.09828	4.09835	-0.48262	0.0281371	-1.54959	0.0125193	-1.12076	0.00220823
1380.26	21.8526	22.4291	12.0614	12.3038	4.12656	4.09751	-0.482773	0.0281314	-1.54959	0.0125167	-1.11482	0.00220777
1381.26	21.8587	22.4245	12.0536	12.3013	4.15688	4.09667	-0.474808	0.0281256	-1.56131	0.0125142	-1.10513	0.00220732
1382.26	21.8674	22.42	12.0536	12.2988	4.17641	4.09584	-0.473877	0.0281199	-1.56912	0.0125116	-1.09341	0.00220687
1383.26	21.886	22.4154	12.0508	12.2962	4.20155	4.095	-0.476685	0.0281141	-1.56912	0.0125091	-1.09029	0.00220642
1384.26	21.9005	22.4108	12.0517	12.2937	4.21046	4.09417	-0.467773	0.0281084	-1.56912	0.0125065	-1.0845	0.00220597
1385.26	21.9083	22.4062	12.0489	12.2912	4.21828	4.09333	-0.484497	0.0281026	-1.56131	0.0125039	-1.07857	0.00220552
1386.26	21.9083	22.4017	12.0313	12.2887	4.22108	4.0925	-0.5009	0.0280969	-1.57022	0.0125014	-1.07388	0.00220506
1387.26	21.8994	22.3971	12.0177	12.2862	4.21124	4.09166	-0.506836	0.0280911	-1.57616	0.0124988	-1.07278	0.00220461
1388.26	21.8907	22.3925	12.0177	12.2837	4.19171	4.09083	-0.52356	0.0280854	-1.58678	0.0124963	-1.07889	0.00220416
1389.26	21.874	22.3879	12.0145	12.2812	4.17328	4.08999	-0.537155	0.0280796	-1.58585	0.0124937	-1.07701	0.00220371
1390.26	21.8693	22.3834	12.0117	12.2787	4.1714	4.08916	-0.538086	0.0280739	-1.58678	0.0124912	-1.08591	0.00220326
1391.26	21.8632	22.3788	12.0145	12.2762	4.15077	4.08832	-0.55481	0.0280681	-1.59756	0.0124886	-1.09935	0.00220281
1392.26	21.8712	22.3742	12.0056	12.2737	4.12062	4.08749	-0.548874	0.0280624	-1.59146	0.012486	-1.11607	0.00220236
1393.26	21.8693	22.3697	12.0164	12.2712	4.09718	4.08665	-0.551682	0.0280566	-1.59053	0.0124835	-1.1445	0.00220191
1394.26	21.8526	22.3651	12.0145	12.2687	4.10422	4.08582	-0.538086	0.0280509	-1.59146	0.0124809	-1.17264	0.00220146
1395.26	21.8469	22.3605	12.0145	12.2662	4.10609	4.08499	-0.535278	0.0280451	-1.58585	0.0124784	-1.17435	0.00220101
1396.26	21.8302	22.356	12.0341	12.2637	4.1089	4.08415	-0.535278	0.0280394	-1.60037	0.0124758	-1.18326	0.00220056
1397.26	21.8185	22.3514	12.0341	12.2612	4.12375	4.08332	-0.52356	0.0280337	-1.60037	0.0124733	-1.16263	0.0022001
1398.26	21.799	22.3469	12.0712	12.2587	4.12843	4.08249	-0.538406	0.0280279	-1.58865	0.0124707	-1.14607	0.00219965
1399.26	21.7705	22.3423	12.0731	12.2562	4.14015	4.08165	-0.543091	0.0280222	-1.58865	0.0124682	-1.13716	0.0021992
1400.26	21.7677	22.3377	12.0583	12.2537	4.15968	4.08082	-0.55481	0.0280165	-1.59569	0.0124656	-1.11763	0.00219875
1401.26	21.7599	22.3332	12.0525	12.2512	4.16562	4.07999	-0.551682	0.0280107	-1.59146	0.0124631	-1.10403	0.0021983
1402.26	21.7422	22.3286	12.0555	12.2487	4.15688	4.07915	-0.541061	0.028005	-1.58865	0.0124605	-1.10123	0.00219785
1403.26	21.7435	22.3241	12.0447	12.2462	4.15688	4.07832	-0.538086	0.0279993	-1.59756	0.012458	-1.11295	0.0021974
1404.26	21.7435	22.3195	12.0359	12.2437	4.15781	4.07749	-0.526367	0.0279935	-1.61099	0.0124554	-1.12076	0.00219695
1405.26	21.7493	22.3149	12.0145	12.2412	4.15688	4.07666	-0.532471	0.0279878	-1.60225	0.0124529	-1.11295	0.0021965
1406.26	21.7463	22.3104	12.0145	12.2387	4.16562	4.07583	-0.559021	0.0279821	-1.61099	0.0124503	-1.11295	0.00219606
1407.26	21.7376	22.3058	12.0056	12.2362	4.17328	4.07499	-0.564651	0.0279763	-1.60225	0.0124478	-1.11607	0.00219561
1408.26	21.7268	22.3013	12.0028	12.2337	4.15656	4.07416	-0.575439	0.0279706	-1.58835	0.0124452	-1.12076	0.00219516
1409.26	21.7032	22.2967	12.0028	12.2313	4.14296	4.07333	-0.584183	0.0279649	-1.57381	0.0124427	-1.11295	0.00219471
1410.26	21.6955	22.2922	12.0028	12.2288	4.13124	4.0725	-0.583252	0.0279592	-1.58084	0.0124401	-1.12186	0.00219426
1411.26	21.6974	22.2876	11.988	12.2263	4.11359	4.07167	-0.58606	0.0279534	-1.58865	0.0124376	-1.12466	0.00219381
1412.26	21.6974	22.2831	11.9656	12.2238	4.11078	4.07084	-0.574341	0.0279477	-1.60037	0.012435	-1.13248	0.00219336
1413.26	21.6974	22.2785	11.947	12.2213	4.09999	4.07001	-0.574341	0.027942	-1.62694	0.0124325	-1.12357	0.00219291
1414.26	21.7063	22.274	11.9325	12.2188	4.1089	4.06918	-0.574341	0.0279363	-1.64835	0.0124299	-1.10701	0.00219246
1415.26	21.7072	22.2694	11.9325	12.2163	4.10187	4.06835	-0.580276	0.0279306	-1.64928	0.0124274	-1.11107	0.00219201
1416.26	21.7063	22.2649	11.9236	12.2138	4.12843	4.06752	-0.593872	0.0279248	-1.63943	0.0124249	-1.10123	0.00219156
1417.26	21.6955	22.2603	11.9367	12.2113	4.12843	4.06669	-0.599655	0.0279191	-1.63663	0.0124223	-1.11014	0.00219112
1418.26	21.6868	22.2558	11.9414	12.2088	4.13422	4.06586	-0.602463	0.0279134	-1.64537	0.0124198	-1.09935	0.00219067
1419.26	21.6985	22.2513	11.9512	12.2063	4.14609	4.06503	-0.597778	0.0279077	-1.64835	0.0124172	-1.11014	0.00219022
1420.26	21.6807	22.2467	11.9591	12.2039	4.14796	4.0642	-0.59668	0.027902	-1.65115	0.0124147	-1.11295	0.00218977
1421.26	21.6985	22.2422	11.9442	12.2014	4.15688	4.06337	-0.593872	0.0278963	-1.65897	0.0124121	-1.11295	0.00218932
1422.26	21.7091	22.2376	11.9501	12.1989	4.15187	4.06254	-0.579025	0.0278906	-1.6824	0.0124096	-1.11888	0.00218887
1423.26	21.7151	22.2331	11.952	12.1964	4.14609	4.06171	-0.566528	0.0278849	-1.67349	0.0124071	-1.11482	0.00218843
1424.26	21.7287	22.2286	11.9609	12.1939	4.13734	4.06088	-0.546997	0.0278792	-1.65584	0.0124045	-1.11295	0.00218798
1425.26	21.7344	22.224	11.9637	12.1914	4.12062	4.06005	-0.535278	0.0278735	-1.65897	0.012402	-1.11295	0.00218753
1426.26	21.7385	22.2195	11.9637	12.1889	4.11171	4.05922	-0.515747	0.0278677	-1.65303	0.0123994	-1.09935	0.00218708
1427.26	21.7287	22.215	11.9716	12.1865	4.10297	4.05839	-0.515747	0.027862	-1.65396	0.0123969	-1.08951	0.00218664
1428.26	21.711	22.2104	11.9805	12.184	4.09218	4.05757	-0.511063	0.0278563	-1.64224	0.0123944	-1.07576	0.00218619
1429.26	21.7119	22.2059	11.9903	12.1815	4.09125	4.05674	-0.515747	0.0278506	-1.62178	0.0123918	-1.0817	0.00218574
1430.26	21.6943	22.2014	11.995	12.179	4.11281	4.05591	-0.52356	0.0278449	-1.63052	0.0123893	-1.0817	0.00218529
1431.26	21.6747	22.1968	12.0009	12.1765	4.11171	4.05508	-0.532471	0.0278392	-1.62178	0.0123868	-1.07278	0.00218485
1432.26	21.6611	22.1923	11.9911	12.1741	4.08937	4.05426	-0.526367	0.0278335	-1.6199	0.0123842	-1.07576	0.0021844
1433.26	21.6466	22.1878	11.9716	12.1716	4.0925	4.05343	-0.512939	0.0278278	-1.6199	0.0123817	-1.07388	0.00218395
1434.26	21.6388	22.1832	11.9508	12.1691	4.08937	4.0526	-0.515747	0.0278221	-1.62271	0.0123792	-1.06216	0.0021835
1435.26	21.6282	22.1787	11.9205	12.1666	4.07765	4.05177	-0.530594	0.0278165	-1.63943	0.0123766	-1.04857	0.00218306
1436.26	21.6263	22.1742	11.8981	12.1641	4.06984	4.05095	-0.515747	0.0278108	-1.64725	0.0123741	-1.05357	0.00218261
1437.26	21.6341	22.1697	11.8856	12.1616	4.05812	4.05012	-0.511063	0.0278051	-1.64835	0.0123716	-1.06825	0.00218216
1438.26	21.6388	22.1651	11.8739	12.1592	4.04327	4.04929	-0.524658	0.0277994	-1.65709	0.012369	-1.0817	0.00218172
1439.26	21.6388	22.1606	11.8798	12.1567	4.02968	4.04847	-0.526367	0.0277937	-1.65897	0.0123665	-1.0817	0.00218127
1440.26	21.6282	22.1561	11.9083	12.1542	4.0464	4.04764	-0.538086	0.027788	-1.64725	0.012364	-1.07278	0.00218082
1441.26	21.6104	22.1516	11.9191	12.1517	4.05219	4.04682	-0.544189	0.0277823	-1.62772	0.0123614	-1.0817	0.00218038
1442.26	21.6076	22.147	11.9306	12.1493	4.05812	4.04599	-0.55481	0.0277766	-1.62772	0.0123589	-1.06685	0.00217993
1443.26	21.5997	22.1425	11.9414	12.1468	4.05031	4.04516	-0.56543	0.0277709	-1.6199	0.0123564	-1.05325	0.00217949
1444.26	21.588	22.138	11.9325	12.1443	4.05812	4.04434	-0.568405	0.0277653	-1.60818	0.0123538	-1.05045	0.00217904
1445.26	21.5891	22.1335	11.9353	12.1418	4.06984	4.04351	-0.55481	0.0277596	-1.6199	0.0123513	-1.04451	0.00217859
1446.26	21.5862	22.129	11.9208	12.1394	4.06984	4.04269	-0.538086	0.0277539	-1.6199	0.0123488	-1.05435	0.00217815
1447.26	21.5774	22.1244	11.9208	12.1369	4.06984	4.04186	-0.528244	0.0277482	-1.65428	0.0123463	-1.06216	0.0021777
1448.26	21.5862	22.1199	11.9208	12.1344	4.05031	4.04104	-0.529343	0.0277425	-1.65897	0.0123437	-1.07388	0.00217726
1449.26	21.5685	22.1154	11.913	12.1319	4.04327	4.04021	-0.526367	0.0277369	-1.66505	0.0123412	-1.0845	0.00217681
1450.26	21.5657	22.1109	11.9012	12.1295	4.02968	4.03939	-0.529343	0.0277312	-1.6824	0.0123387	-1.08357	0.00217637
1451.26	21.5685	22.1064	11.9023	12.127	4.01906	4.03856	-0.521378	0.0277255	-1.67349	0.0123362	-1.08763	0.00217592
1452.26	21.5607	22.1019	11.8994	12.1245	4.00421	4.03774	-0.543091	0.0277198	-1.6796	0.0123336	-1.11014	0.00217547
1453.26	21.5518	22.0974	11.8906	12.1221	4.00421	4.03692	-0.55481	0.0277142	-1.67068	0.0123311	-1.11295	0.00217503
1454.26	21.549	22.0929	11.8916	12.1196	3.98468	4.03609	-0.552002	0.0277085	-1.67662	0.0123286	-1.11607	0.00217458
1455.26	21.5313	22.0883	11.8789	12.1171	3.98468	4.03527	-0.555908	0.0277028	-1.68428	0.0123261	-1.13669	0.00217414
1456.26	21.5216	22.0838	11.8798	12.1146	3.98	4.03445	-0.552933	0.0276971	-1.6824	0.0123235	-1.15904	0.00217369
1457.26	21.5127	22.0793	11.8817	12.1122	3.99953	4.03362	-0.569656	0.0276915	-1.6813	0.012321	-1.16966	0.00217325
1458.26	21.5099	22.0748	11.8641	12.1097	4.00546	4.0328	-0.563721	0.0276858	-1.69022	0.0123185	-1.16873	0.0021728
1459.26	21.5029	22.0703	11.865	12.1072	3.99672	4.03198	-0.552933	0.0276801	-1.70975	0.012316	-1.17154	0.00217236
1460.26	21.5071	22.0658	11.8562	12.1048	4.01437	4.03115	-0.552002	0.0276745	-1.72147	0.0123135	-1.16263	0.00217191
1461.26	21.5099	22.0613	11.8395	12.1023	4.03391	4.03033	-0.552933	0.0276688	-1.71255	0.0123109	-1.15669	0.00217147
1462.26	21.5158	22.0568	11.8427	12.0998	4.05344	4.02951	-0.563721	0.0276631	-1.71162	0.0123084	-1.13716	0.00217103
1463.26	21.5188	22.0523	11.8348	12.0974	4.03859	4.02869	-0.569656	0.0276575	-1.70193	0.0123059	-1.11763	0.00217058
1464.26	21.5158	22.0478	11.8302	12.0949	4.05031	4.02786	-0.594971	0.0276518	-1.70084	0.0123034	-1.11185	0.00217014
1465.26	21.5099	22.0433	11.8291	12.0924	4.0639	4.02704	-0.591995	0.0276462	-1.69803	0.0123009	-1.12076	0.00216969
1466.26	21.4805	22.0388	11.8458	12.09	4.06093	4.02622	-0.614502	0.0276405	-1.67537	0.0122983	-1.13248	0.00216925
1467.26	21.4619	22.0343	11.8516	12.0875	4.06984	4.0254	-0.616211	0.0276348	-1.65303	0.0122958	-1.12967	0.0021688
1468.26	21.4532	22.0298	11.8348	12.0851	4.07172	4.02458	-0.613403	0.0276292	-1.63162	0.0122933	-1.11888	0.00216836
1469.26	21.4424	22.0253	11.838	12.0826	4.07265	4.02376	-0.619186	0.0276235	-1.6199	0.0122908	-1.11014	0.00216792
1470.26	21.4385	22.0208	11.8427	12.0801	4.06703	4.02293	-0.608398	0.0276179	-1.60037	0.0122883	-1.11014	0.00216747
1471.26	21.4446	22.0163	11.8484	12.0777	4.06796	4.02211	-0.593872	0.0276122	-1.60037	0.0122858	-1.11107	0.00216703
1472.26	21.468	22.0118	11.8544	12.0752	4.0639	4.02129	-0.580124	0.0276066	-1.60037	0.0122832	-1.12186	0.00216659
1473.26	21.4736	22.0073	11.8603	12.0727	4.06203	4.02047	-0.584183	0.0276009	-1.61522	0.0122807	-1.11575	0.00216614
1474.26	21.468	22.0028	11.8711	12.0703	4.05312	4.01965	-0.593872	0.0275953	-1.64647	0.0122782	-1.12967	0.0021657
1475.26	21.4619	21.9984	11.8739	12.0678	4.0414	4.01883	-0.605591	0.0275896	-1.65709	0.0122757	-1.1306	0.00216526
1476.26	21.468	21.9939	11.872	12.0654	4.05219	4.01801	-0.613403	0.027584	-1.67569	0.0122732	-1.12967	0.00216481
1477.26	21.4708	21.9894	11.8653	12.0629	4.03546	4.01719	-0.613403	0.0275783	-1.6796	0.0122707	-1.1356	0.00216437
1478.26	21.4591	21.9849	11.8711	12.0604	4.03859	4.01637	-0.607468	0.0275727	-1.68553	0.0122682	-1.12357	0.00216393
1479.26	21.4662	21.9804	11.8739	12.058	4.01593	4.01555	-0.605591	0.0275671	-1.66177	0.0122657	-1.12967	0.00216348
1480.26	21.4572	21.9759	11.8669	12.0555	4.01015	4.01473	-0.588867	0.0275614	-1.62459	0.0122631	-1.14029	0.00216304
1481.26	21.4544	21.9714	11.8591	12.0531	4.00734	4.01391	-0.574341	0.0275558	-1.59334	0.0122606	-1.1431	0.0021626
1482.26	21.4279	21.9669	11.8502	12.0506	3.99953	4.01309	-0.569656	0.0275501	-1.58084	0.0122581	-1.14607	0.00216216
1483.26	21.4055	21.9625	11.8384	12.0482	3.98781	4.01228	-0.58606	0.0275445	-1.57974	0.0122556	-1.1442	0.00216171
1484.26	21.381	21.958	11.8278	12.0457	3.99672	4.01146	-0.594971	0.0275389	-1.58272	0.0122531	-1.13248	0.00216127
1485.26	21.3615	21.9535	11.8309	12.0432	4.00546	4.01064	-0.591995	0.0275332	-1.58678	0.0122506	-1.11295	0.00216083
1486.26	21.338	21.949	11.8231	12.0408	4.01625	4.00982	-0.602783	0.0275276	-1.59756	0.0122481	-1.10123	0.00216039
1487.26	21.338	21.9445	11.832	12.0383	4.01125	4.009	-0.605591	0.0275219	-1.59569	0.0122456	-1.09935	0.00215994
1488.26	21.338	21.9401	11.8348	12.0359	4.01125	4.00818	-0.608398	0.0275163	-1.60928	0.0122431	-1.09529	0.0021595
1489.26	21.3497	21.9356	11.8348	12.0334	3.99953	4.00737	-0.625122	0.0275107	-1.61522	0.0122406	-1.11295	0.00215906
1490.26	21.3557	21.9311	11.8142	12.031	3.99953	4.00655	-0.625122	0.0275051	-1.62584	0.0122381	-1.11185	0.00215862
1491.26	21.3576	21.9266	11.8172	12.0285	4.00546	4.00573	-0.626999	0.0274994	-1.65428	0.0122356	-1.10591	0.00215818
1492.26	21.3665	21.9222	11.8064	12.0261	3.99953	4.00491	-0.610275	0.0274938	-1.65897	0.0122331	-1.10591	0.00215773
1493.26	21.3693	21.9177	11.7977	12.0236	3.99672	4.0041	-0.593567	0.0274882	-1.65897	0.0122306	-1.10591	0.00215729
1494.26	21.3604	21.9132	11.778	12.0212	3.98593	4.00328	-0.571213	0.0274825	-1.66788	0.0122281	-1.10123	0.00215685
1495.26	21.3576	21.9087	11.7547	12.0187	3.99672	4.00246	-0.557617	0.0274769	-1.65897	0.0122256	-1.11185	0.00215641
1496.26	21.3516	21.9043	11.7587	12.0163	3.99672	4.00164	-0.560593	0.0274713	-1.65709	0.012223	-1.12076	0.00215597
1497.26	21.3408	21.8998	11.7695	12.0138	3.99171	4.00083	-0.546997	0.0274657	-1.66084	0.0122205	-1.13248	0.00215553
1498.26	21.338	21.8953	11.7794	12.0114	3.9828	4.00001	-0.558716	0.02746	-1.65115	0.012218	-1.14139	0.00215509
1499.26	21.3352	21.8909	11.7872	12.0089	3.98	3.99919	-0.566528	0.0274544	-1.65897	0.0122155	-1.1442	0.00215465
1500.26	21.3618	21.8864	11.7961	12.0065	3.97108	3.99838	-0.566528	0.0274488	-1.66959	0.012213	-1.15201	0.0021542
1501.26	21.3646	21.8819	11.7989	12.004	3.97015	3.99756	-0.577148	0.0274432	-1.67256	0.0122105	-1.1442	0.00215376
1502.26	21.3557	21.8774	11.7919	12.0016	3.95155	3.99675	-0.580124	0.0274376	-1.67349	0.012208	-1.14732	0.00215332
1503.26	21.3618	21.873	11.7723	11.9991	3.94281	3.99593	-0.577148	0.027432	-1.67068	0.0122055	-1.16092	0.00215288
1504.26	21.3782	21.8685	11.7734	11.9967	3.93983	3.99512	-0.571213	0.0274263	-1.6785	0.012203	-1.17545	0.00215244
1505.26	21.3752	21.8641	11.7822	11.9943	3.92921	3.9943	-0.566528	0.0274207	-1.69913	0.0122006	-1.19029	0.002152
1506.26	21.3587	21.8596	11.7781	11.9918	3.93813	3.99349	-0.55481	0.0274151	-1.70787	0.0121981	-1.17747	0.00215156
1507.26	21.3497	21.8551	11.7673	11.9894	3.94093	3.99267	-0.546997	0.0274095	-1.71756	0.0121956	-1.18045	0.00215112
1508.26	21.3497	21.8507	11.7645	11.9869	3.94875	3.99186	-0.541214	0.0274039	-1.73241	0.0121931	-1.17154	0.00215068
1509.26	21.333	21.8462	11.7439	11.9845	3.93983	3.99104	-0.532471	0.0273983	-1.746	0.0121906	-1.15794	0.00215024
1510.26	21.3036	21.8418	11.7411	11.982	3.93703	3.99023	-0.518875	0.0273927	-1.741	0.0121881	-1.14607	0.0021498
1511.26	21.2705	21.8373	11.7305	11.9796	3.92218	3.98941	-0.512939	0.0273871	-1.72037	0.0121856	-1.13528	0.00214936
1512.26	21.2422	21.8328	11.7227	11.9772	3.91437	3.9886	-0.502151	0.0273815	-1.70381	0.0121831	-1.12076	0.00214892
1513.26	21.2287	21.8284	11.7197	11.9747	3.90968	3.98778	-0.512939	0.0273759	-1.70193	0.0121806	-1.12076	0.00214848
1514.26	21.224	21.8239	11.7305	11.9723	3.90077	3.98697	-0.51387	0.0273703	-1.6813	0.0121781	-1.10904	0.00214804
1515.26	21.2251	21.8195	11.7333	11.9698	3.89516	3.98616	-0.532471	0.0273647	-1.65303	0.0121756	-1.12076	0.0021476
1516.26	21.2357	21.815	11.7392	11.9674	3.89015	3.98534	-0.541214	0.0273591	-1.64537	0.0121731	-1.12654	0.00214716
1517.26	21.2346	21.8106	11.7469	11.965	3.88437	3.98453	-0.562622	0.0273535	-1.63663	0.0121706	-1.11575	0.00214672
1518.26	21.2454	21.8061	11.7645	11.9625	3.87563	3.98372	-0.591064	0.0273479	-1.64537	0.0121681	-1.12654	0.00214628
1519.26	21.2404	21.8017	11.7634	11.9601	3.87062	3.9829	-0.608398	0.0273423	-1.65616	0.0121656	-1.13248	0.00214584
1520.26	21.2404	21.7972	11.7606	11.9576	3.87062	3.98209	-0.607468	0.0273367	-1.67068	0.0121631	-1.1431	0.0021454
1521.26	21.2404	21.7928	11.7528	11.9552	3.84999	3.98128	-0.593567	0.0273311	-1.6949	0.0121607	-1.1431	0.00214496
1522.26	21.2287	21.7883	11.7528	11.9528	3.85609	3.98047	-0.571213	0.0273255	-1.71443	0.0121582	-1.14029	0.00214452
1523.26	21.224	21.7839	11.7411	11.9503	3.8589	3.97965	-0.574341	0.0273199	-1.70084	0.0121557	-1.13748	0.00214409
1524.26	21.2208	21.7794	11.7333	11.9479	3.87375	3.97884	-0.551682	0.0273143	-1.70271	0.0121532	-1.1431	0.00214365
1525.26	21.218	21.775	11.7216	11.9455	3.86671	3.97803	-0.546997	0.0273087	-1.69209	0.0121507	-1.14497	0.00214321
1526.26	21.2151	21.7705	11.7137	11.943	3.86781	3.97722	-0.546997	0.0273031	-1.67349	0.0121482	-1.14607	0.00214277
1527.26	21.2091	21.7661	11.7227	11.9406	3.86484	3.97641	-0.555908	0.0272975	-1.66788	0.0121457	-1.1442	0.00214233
1528.26	21.2169	21.7617	11.7119	11.9382	3.8589	3.9756	-0.581375	0.0272919	-1.68553	0.0121432	-1.15201	0.00214189
1529.26	21.2091	21.7572	11.7137	11.9357	3.85609	3.97478	-0.597778	0.0272864	-1.6813	0.0121408	-1.16373	0.00214145
1530.26	21.2122	21.7528	11.7227	11.9333	3.84999	3.97397	-0.603714	0.0272808	-1.69022	0.0121383	-1.17154	0.00214102
1531.26	21.2211	21.7483	11.7137	11.9309	3.85609	3.97316	-0.622314	0.0272752	-1.70975	0.0121358	-1.16966	0.00214058
1532.26	21.2446	21.7439	11.7197	11.9284	3.86906	3.97235	-0.62793	0.0272696	-1.70694	0.0121333	-1.18045	0.00214014
1533.26	21.2463	21.7395	11.7039	11.926	3.86781	3.97154	-0.644653	0.027264	-1.72147	0.0121308	-1.17435	0.0021397
1534.26	21.2482	21.735	11.6942	11.9236	3.87656	3.97073	-0.632935	0.0272584	-1.7274	0.0121283	-1.17342	0.00213926
1535.26	21.2404	21.7306	11.6794	11.9211	3.86671	3.96992	-0.625122	0.0272529	-1.73241	0.0121259	-1.16841	0.00213883
1536.26	21.2107	21.7261	11.6552	11.9187	3.86781	3.96911	-0.605591	0.0272473	-1.72647	0.0121234	-1.17154	0.00213839
1537.26	21.1865	21.7217	11.6552	11.9163	3.87062	3.9683	-0.593872	0.0272417	-1.72147	0.0121209	-1.17435	0.00213795
1538.26	21.1701	21.7173	11.6611	11.9139	3.87531	3.96749	-0.58606	0.0272361	-1.70975	0.0121184	-1.1656	0.00213751
1539.26	21.1701	21.7128	11.6797	11.9114	3.88234	3.96668	-0.58606	0.0272306	-1.71255	0.0121159	-1.16373	0.00213708
1540.26	21.1505	21.7084	11.6884	11.909	3.89609	3.96587	-0.58606	0.027225	-1.67725	0.0121135	-1.16373	0.00213664
1541.26	21.1505	21.704	11.7198	11.9066	3.91156	3.96506	-0.58606	0.0272194	-1.65866	0.012111	-1.15904	0.0021362
1542.26	21.1416	21.6996	11.7392	11.9041	3.90968	3.96425	-0.593872	0.0272138	-1.63631	0.0121085	-1.16373	0.00213576
1543.26	21.1388	21.6951	11.7469	11.9017	3.90077	3.96344	-0.593872	0.0272083	-1.63756	0.012106	-1.15013	0.00213533
1544.26	21.124	21.6907	11.745	11.8993	3.89203	3.96263	-0.602783	0.0272027	-1.63663	0.0121035	-1.14029	0.00213489
1545.26	21.1133	21.6863	11.7392	11.8969	3.88124	3.96183	-0.597778	0.0271971	-1.64647	0.0121011	-1.1492	0.00213445
1546.26	21.1026	21.6818	11.7422	11.8944	3.88124	3.96102	-0.577148	0.0271916	-1.666	0.0120986	-1.15201	0.00213402
1547.26	21.0997	21.6774	11.7392	11.892	3.8725	3.96021	-0.566528	0.027186	-1.67381	0.0120961	-1.1431	0.00213358
1548.26	21.088	21.673	11.7305	11.8896	3.86171	3.9594	-0.574341	0.0271804	-1.68741	0.0120936	-1.15201	0.00213314
1549.26	21.088	21.6686	11.7197	11.8872	3.85297	3.95859	-0.568405	0.0271749	-1.65584	0.0120912	-1.15201	0.00213271
1550.26	21.0891	21.6641	11.702	11.8848	3.8589	3.95779	-0.554504	0.0271693	-1.63631	0.0120887	-1.16092	0.00213227
1551.26	21.0951	21.6597	11.6961	11.8823	3.87062	3.95698	-0.539963	0.0271638	-1.61099	0.0120862	-1.15482	0.00213183
1552.26	21.0979	21.6553	11.6736	11.8799	3.86171	3.95617	-0.53215	0.0271582	-1.60037	0.0120837	-1.17575	0.0021314
1553.26	21.0821	21.6509	11.657	11.8775	3.86781	3.95536	-0.526367	0.0271526	-1.59756	0.0120813	-1.19342	0.00213096
1554.26	21.0724	21.6465	11.6462	11.8751	3.87062	3.95456	-0.535278	0.0271471	-1.5985	0.0120788	-1.20592	0.00213052
1555.26	21.0713	21.642	11.6434	11.8726	3.89328	3.95375	-0.55481	0.0271415	-1.62411	0.0120763	-1.19107	0.00213009
1556.26	21.0743	21.6376	11.6434	11.8702	3.90077	3.95294	-0.581375	0.027136	-1.65428	0.0120739	-1.20592	0.00212965
1557.26	21.0635	21.6332	11.6523	11.8678	3.89796	3.95214	-0.608719	0.0271304	-1.65897	0.0120714	-1.20779	0.00212922
1558.26	21.0518	21.6288	11.6494	11.8654	3.88625	3.95133	-0.638718	0.0271249	-1.65897	0.0120689	-1.20279	0.00212878
1559.26	21.0568	21.6244	11.6661	11.863	3.8725	3.95052	-0.656372	0.0271193	-1.66177	0.0120664	-1.18794	0.00212834
1560.26	21.049	21.62	11.6778	11.8606	3.8589	3.94972	-0.664185	0.0271138	-1.65303	0.012064	-1.18216	0.00212791
1561.26	21.0551	21.6156	11.6719	11.8581	3.86484	3.94891	-0.664185	0.0271082	-1.65897	0.0120615	-1.17935	0.00212747
1562.26	21.0677	21.6111	11.6836	11.8557	3.86781	3.9481	-0.656372	0.0271027	-1.65005	0.012059	-1.17342	0.00212704
1563.26	21.0666	21.6067	11.6864	11.8533	3.87375	3.9473	-0.656372	0.0270971	-1.64725	0.0120566	-1.17154	0.0021266
1564.26	21.0774	21.6023	11.6686	11.8509	3.8589	3.94649	-0.6595	0.0270916	-1.65303	0.0120541	-1.17154	0.00212617
1565.26	21.083	21.5979	11.6422	11.8485	3.87375	3.94569	-0.664185	0.027086	-1.65115	0.0120516	-1.16966	0.00212573
1566.26	21.0802	21.5935	11.6137	11.8461	3.87953	3.94488	-0.673096	0.0270805	-1.65709	0.0120492	-1.18045	0.0021253
1567.26	21.0419	21.5891	11.5923	11.8436	3.87656	3.94408	-0.693558	0.0270749	-1.66678	0.0120467	-1.18326	0.00212486
1568.26	21.0235	21.5847	11.5778	11.8412	3.87563	3.94327	-0.689499	0.0270694	-1.65897	0.0120442	-1.18919	0.00212443
1569.26	21.0216	21.5803	11.5564	11.8388	3.86952	3.94247	-0.666992	0.0270639	-1.66678	0.0120418	-1.18826	0.00212399
1570.26	21.0158	21.5759	11.5419	11.8364	3.85297	3.94166	-0.653564	0.0270583	-1.66788	0.0120393	-1.19701	0.00212356
1571.26	21.0071	21.5715	11.5508	11.834	3.83046	3.94086	-0.64856	0.0270528	-1.66177	0.0120368	-1.19107	0.00212312
1572.26	21.0158	21.5671	11.5684	11.8316	3.81984	3.94006	-0.639648	0.0270472	-1.65897	0.0120344	-1.19998	0.00212269
1573.26	21.0443	21.5627	11.588	11.8292	3.80219	3.93925	-0.636841	0.0270417	-1.65303	0.0120319	-1.19107	0.00212225
1574.26	21.0462	21.5583	11.5927	11.8268	3.7914	3.93845	-0.636841	0.0270362	-1.63943	0.0120294	-1.17435	0.00212182
1575.26	21.0401	21.5539	11.5997	11.8243	3.7975	3.93764	-0.645752	0.0270306	-1.63756	0.012027	-1.15982	0.00212138
1576.26	21.0294	21.5495	11.6122	11.8219	3.81796	3.93684	-0.64856	0.0270251	-1.64725	0.0120245	-1.15982	0.00212095
1577.26	21.0177	21.5451	11.627	11.8195	3.82875	3.93604	-0.642776	0.0270196	-1.64725	0.0120221	-1.15982	0.00212052
1578.26	21.0071	21.5407	11.6239	11.8171	3.85703	3.93523	-0.636841	0.027014	-1.65303	0.0120196	-1.15982	0.00212008
1579.26	20.9982	21.5363	11.6317	11.8147	3.8589	3.93443	-0.636841	0.0270085	-1.67068	0.0120171	-1.16873	0.00211965
1580.26	20.9904	21.5319	11.6239	11.8123	3.8589	3.93363	-0.621994	0.027003	-1.67537	0.0120147	-1.17154	0.00211921
1581.26	20.9904	21.5275	11.6406	11.8099	3.84718	3.93283	-0.61731	0.0269975	-1.66177	0.0120122	-1.16841	0.00211878
1582.26	20.9787	21.5231	11.6552	11.8075	3.84718	3.93202	-0.634033	0.0269919	-1.65584	0.0120098	-1.17154	0.00211835
1583.26	20.9787	21.5187	11.6434	11.8051	3.85297	3.93122	-0.64856	0.0269864	-1.65115	0.0120073	-1.17154	0.00211791
1584.26	20.9904	21.5143	11.6494	11.8027	3.83046	3.93042	-0.654495	0.0269809	-1.65115	0.0120048	-1.17747	0.00211748
1585.26	20.9904	21.5099	11.6523	11.8003	3.81281	3.92962	-0.653564	0.0269754	-1.66006	0.0120024	-1.17154	0.00211705
1586.26	20.9904	21.5055	11.6494	11.7979	3.80812	3.92881	-0.64856	0.0269698	-1.65709	0.0119999	-1.18826	0.00211661
1587.26	20.9787	21.5011	11.6495	11.7955	3.80812	3.92801	-0.656372	0.0269643	-1.68553	0.0119975	-1.19998	0.00211618
1588.26	20.9846	21.4968	11.6267	11.7931	3.80812	3.92721	-0.661057	0.0269588	-1.68741	0.011995	-1.20091	0.00211575
1589.26	20.9954	21.4924	11.6122	11.7907	3.80031	3.92641	-0.64856	0.0269533	-1.69615	0.0119926	-1.19685	0.00211531
1590.26	20.9904	21.488	11.6044	11.7883	3.80031	3.92561	-0.647461	0.0269478	-1.67256	0.0119901	-1.18607	0.00211488
1591.26	20.9787	21.4836	11.5837	11.7859	3.7975	3.92481	-0.635742	0.0269423	-1.6649	0.0119877	-1.17622	0.00211445
1592.26	20.968	21.4792	11.575	11.7835	3.7914	3.92401	-0.632935	0.0269367	-1.65616	0.0119852	-1.15669	0.00211402
1593.26	20.9572	21.4748	11.5791	11.7811	3.78859	3.92321	-0.632935	0.0269312	-1.63052	0.0119828	-1.1431	0.00211358
1594.26	20.9485	21.4704	11.5809	11.7786	3.80922	3.9224	-0.632935	0.0269257	-1.60818	0.0119803	-1.14029	0.00211315
1595.26	20.9513	21.4661	11.6016	11.7762	3.81203	3.9216	-0.626999	0.0269202	-1.6171	0.0119778	-1.14139	0.00211272
1596.26	20.9396	21.4617	11.5927	11.7738	3.80031	3.9208	-0.625122	0.0269147	-1.62271	0.0119754	-1.15201	0.00211229
1597.26	20.9466	21.4573	11.5927	11.7714	3.7914	3.92	-0.625122	0.0269092	-1.6335	0.0119729	-1.15794	0.00211185
1598.26	20.9513	21.4529	11.5778	11.7691	3.77968	3.9192	-0.625122	0.0269037	-1.63943	0.0119705	-1.16873	0.00211142
1599.26	20.9513	21.4485	11.5494	11.7667	3.77687	3.9184	-0.616211	0.0268982	-1.65115	0.011968	-1.18919	0.00211099
1600.26	20.9396	21.4442	11.5419	11.7643	3.76625	3.9176	-0.613403	0.0268927	-1.65005	0.0119656	-1.20467	0.00211056
1601.26	20.9201	21.4398	11.5341	11.7619	3.76906	3.91681	-0.619186	0.0268872	-1.65897	0.0119631	-1.21341	0.00211012
1602.26	20.9083	21.4354	11.5341	11.7595	3.76015	3.91601	-0.616211	0.0268817	-1.65897	0.0119607	-1.21638	0.00210969
1603.26	20.8857	21.431	11.543	11.7571	3.77797	3.91521	-0.625122	0.0268762	-1.64725	0.0119583	-1.19966	0.00210926
1604.26	20.881	21.4267	11.5548	11.7547	3.76015	3.91441	-0.610275	0.0268707	-1.62772	0.0119558	-1.18607	0.00210883
1605.26	20.8693	21.4223	11.5508	11.7523	3.7514	3.91361	-0.59668	0.0268652	-1.63663	0.0119534	-1.19107	0.0021084
1606.26	20.8752	21.4179	11.5489	11.7499	3.75233	3.91281	-0.587936	0.0268597	-1.63756	0.0119509	-1.1981	0.00210797
1607.26	20.886	21.4136	11.5341	11.7475	3.75734	3.91201	-0.574341	0.0268542	-1.6335	0.0119485	-1.19998	0.00210753
1608.26	20.8888	21.4092	11.5145	11.7451	3.77797	3.91121	-0.589188	0.0268487	-1.63943	0.011946	-1.20872	0.0021071
1609.26	20.8958	21.4048	11.5117	11.7427	3.76906	3.91042	-0.602783	0.0268432	-1.61678	0.0119436	-1.2106	0.00210667
1610.26	20.9083	21.4004	11.5173	11.7403	3.78391	3.90962	-0.618561	0.0268377	-1.6199	0.0119411	-1.2106	0.00210624
1611.26	20.9094	21.3961	11.5223	11.7379	3.80344	3.90882	-0.637146	0.0268322	-1.61678	0.0119387	-1.19576	0.00210581
1612.26	20.9005	21.3917	11.5341	11.7355	3.81703	3.90802	-0.653564	0.0268267	-1.62271	0.0119362	-1.18513	0.00210538
1613.26	20.881	21.3873	11.5419	11.7331	3.80624	3.90722	-0.656372	0.0268212	-1.6199	0.0119338	-1.17435	0.00210495
1614.26	20.8752	21.383	11.5419	11.7307	3.80031	3.90643	-0.647461	0.0268157	-1.62881	0.0119314	-1.15982	0.00210452
1615.26	20.8665	21.3786	11.5419	11.7283	3.78859	3.90563	-0.647461	0.0268102	-1.64647	0.0119289	-1.17154	0.00210409
1616.26	20.8497	21.3743	11.5341	11.726	3.78578	3.90483	-0.638718	0.0268047	-1.65115	0.0119265	-1.15982	0.00210366
1617.26	20.8302	21.3699	11.5223	11.7236	3.78671	3.90404	-0.635742	0.0267992	-1.63943	0.011924	-1.15982	0.00210322
1618.26	20.8224	21.3655	11.5145	11.7212	3.77687	3.90324	-0.626999	0.0267938	-1.62271	0.0119216	-1.15388	0.00210279
1619.26	20.8283	21.3612	11.5028	11.7188	3.76906	3.90244	-0.625122	0.0267883	-1.60818	0.0119192	-1.15482	0.00210236
1620.26	20.8154	21.3568	11.5177	11.7164	3.75844	3.90165	-0.631058	0.0267828	-1.60506	0.0119167	-1.15201	0.00210193
1621.26	20.8185	21.3525	11.5028	11.714	3.74953	3.90085	-0.641846	0.0267773	-1.59927	0.0119143	-1.15201	0.0021015
1622.26	20.8302	21.3481	11.4911	11.7116	3.74953	3.90005	-0.644653	0.0267718	-1.60225	0.0119118	-1.1492	0.00210107
1623.26	20.8274	21.3437	11.4833	11.7092	3.75546	3.89926	-0.650589	0.0267664	-1.60318	0.0119094	-1.15794	0.00210064
1624.26	20.8362	21.3394	11.4567	11.7069	3.7514	3.89846	-0.66246	0.0267609	-1.60037	0.011907	-1.16685	0.00210021
1625.26	20.838	21.335	11.4461	11.7045	3.76015	3.89767	-0.662308	0.0267554	-1.60928	0.0119045	-1.17154	0.00209978
1626.26	20.8469	21.3307	11.4353	11.7021	3.77094	3.89687	-0.664185	0.0267499	-1.61522	0.0119021	-1.20309	0.00209935
1627.26	20.8497	21.3263	11.4353	11.6997	3.78078	3.89608	-0.6595	0.0267445	-1.64647	0.0118996	-1.20872	0.00209892
1628.26	20.8479	21.322	11.4255	11.6973	3.80031	3.89528	-0.665283	0.026739	-1.63943	0.0118972	-1.21951	0.00209849
1629.26	20.8576	21.3176	11.4208	11.6949	3.82265	3.89449	-0.656372	0.0267335	-1.66006	0.0118948	-1.21341	0.00209806
1630.26	20.8576	21.3133	11.4297	11.6925	3.83344	3.89369	-0.647461	0.026728	-1.66756	0.0118923	-1.22733	0.00209764
1631.26	20.8497	21.3089	11.4384	11.6902	3.83156	3.8929	-0.644653	0.0267226	-1.65396	0.0118899	-1.22232	0.00209721
1632.26	20.8263	21.3046	11.4492	11.6878	3.83046	3.8921	-0.644653	0.0267171	-1.65115	0.0118875	-1.20279	0.00209678
1633.26	20.8185	21.3002	11.4637	11.6854	3.83344	3.89131	-0.629807	0.0267116	-1.63943	0.011885	-1.19107	0.00209635
1634.26	20.793	21.2959	11.4727	11.683	3.80312	3.89051	-0.621994	0.0267062	-1.62881	0.0118826	-1.18045	0.00209592
1635.26	20.7822	21.2915	11.4833	11.6806	3.7975	3.88972	-0.610275	0.0267007	-1.60631	0.0118802	-1.15794	0.00209549
1636.26	20.7618	21.2872	11.4861	11.6783	3.80624	3.88893	-0.605591	0.0266952	-1.6035	0.0118777	-1.15201	0.00209506
1637.26	20.7599	21.2828	11.4833	11.6759	3.80812	3.88813	-0.608398	0.0266898	-1.60928	0.0118753	-1.1492	0.00209463
1638.26	20.7716	21.2785	11.4833	11.6735	3.80219	3.88734	-0.613403	0.0266843	-1.61522	0.0118729	-1.16966	0.0020942
1639.26	20.751	21.2741	11.4833	11.6711	3.80031	3.88655	-0.619186	0.0266788	-1.62584	0.0118705	-1.17154	0.00209377
1640.26	20.7599	21.2698	11.4981	11.6687	3.7914	3.88575	-0.623245	0.0266734	-1.62772	0.011868	-1.15982	0.00209335
1641.26	20.7482	21.2655	11.5059	11.6664	3.77374	3.88496	-0.625122	0.0266679	-1.63663	0.0118656	-1.17467	0.00209292
1642.26	20.7344	21.2611	11.5148	11.664	3.76906	3.88417	-0.619186	0.0266625	-1.63663	0.0118632	-1.18826	0.00209249
1643.26	20.7119	21.2568	11.5372	11.6616	3.76906	3.88338	-0.608398	0.026657	-1.63052	0.0118607	-1.17435	0.00209206
1644.26	20.6924	21.2524	11.5419	11.6592	3.76906	3.88258	-0.605591	0.0266515	-1.63052	0.0118583	-1.15388	0.00209163
1645.26	20.6868	21.2481	11.543	11.6569	3.77609	3.88179	-0.593872	0.0266461	-1.64131	0.0118559	-1.15201	0.0020912
1646.26	20.7044	21.2438	11.5341	11.6545	3.78391	3.881	-0.58606	0.0266406	-1.63943	0.0118535	-1.15201	0.00209078
1647.26	20.7122	21.2394	11.5251	11.6521	3.80344	3.88021	-0.602783	0.0266352	-1.63631	0.011851	-1.1431	0.00209035
1648.26	20.7524	21.2351	11.5192	11.6497	3.81703	3.87941	-0.612625	0.0266297	-1.64224	0.0118486	-1.13435	0.00208992
1649.26	20.7658	21.2308	11.5056	11.6474	3.80624	3.87862	-0.612625	0.0266243	-1.64725	0.0118462	-1.13248	0.00208949
1650.26	20.7649	21.2264	11.4969	11.645	3.80531	3.87783	-0.61731	0.0266188	-1.65897	0.0118438	-1.1306	0.00208907
1651.26	20.7794	21.2221	11.4861	11.6426	3.80812	3.87704	-0.634033	0.0266134	-1.64725	0.0118413	-1.12076	0.00208864
1652.26	20.7763	21.2178	11.4567	11.6402	3.81984	3.87625	-0.636841	0.0266079	-1.64725	0.0118389	-1.10123	0.00208821
1653.26	20.7646	21.2134	11.452	11.6379	3.81984	3.87546	-0.636841	0.0266025	-1.64725	0.0118365	-1.10123	0.00208778
1654.26	20.7705	21.2091	11.4578	11.6355	3.81984	3.87467	-0.647461	0.0265971	-1.63663	0.0118341	-1.09842	0.00208736
1655.26	20.754	21.2048	11.4559	11.6331	3.81984	3.87388	-0.656372	0.0265916	-1.63756	0.0118316	-1.10826	0.00208693
1656.26	20.751	21.2005	11.4559	11.6307	3.81671	3.87309	-0.665283	0.0265862	-1.63943	0.0118292	-1.12967	0.0020865
1657.26	20.7482	21.1961	11.4619	11.6284	3.7914	3.8723	-0.674026	0.0265807	-1.6335	0.0118268	-1.13841	0.00208607
1658.26	20.7344	21.1918	11.4716	11.626	3.77687	3.87151	-0.664185	0.0265753	-1.63943	0.0118244	-1.14607	0.00208565
1659.26	20.719	21.1875	11.4609	11.6236	3.75421	3.87072	-0.664185	0.0265698	-1.65005	0.011822	-1.15201	0.00208522
1660.26	20.7091	21.1832	11.4619	11.6213	3.73781	3.86993	-0.664185	0.0265644	-1.66475	0.0118195	-1.14592	0.00208479
1661.26	20.7091	21.1788	11.4578	11.6189	3.74953	3.86914	-0.669968	0.026559	-1.64694	0.0118171	-1.14497	0.00208437
1662.26	20.6915	21.1745	11.4559	11.6165	3.74953	3.86835	-0.687622	0.0265535	-1.65115	0.0118147	-1.12544	0.00208394
1663.26	20.676	21.1702	11.4325	11.6142	3.77219	3.86756	-0.686523	0.0265481	-1.65115	0.0118123	-1.13248	0.00208351
1664.26	20.6849	21.1659	11.4247	11.6118	3.78578	3.86677	-0.683716	0.0265427	-1.63943	0.0118099	-1.14029	0.00208309
1665.26	20.6779	21.1615	11.4247	11.6094	3.79453	3.86598	-0.666992	0.0265372	-1.63943	0.0118075	-1.1492	0.00208266
1666.26	20.6868	21.1572	11.3962	11.6071	3.7975	3.86519	-0.658249	0.0265318	-1.65115	0.011805	-1.15794	0.00208223
1667.26	20.6818	21.1529	11.3817	11.6047	3.80031	3.8644	-0.656372	0.0265264	-1.66006	0.0118026	-1.14029	0.00208181
1668.26	20.6966	21.1486	11.3828	11.6023	3.7914	3.86361	-0.644653	0.0265209	-1.68834	0.0118002	-1.14029	0.00208138
1669.26	20.7091	21.1443	11.3845	11.6	3.78578	3.86282	-0.636841	0.0265155	-1.6949	0.0117978	-1.12654	0.00208096
1670.26	20.7002	21.14	11.3817	11.5976	3.77187	3.86204	-0.642776	0.0265101	-1.6813	0.0117954	-1.11575	0.00208053
1671.26	20.6915	21.1356	11.3817	11.5952	3.75421	3.86125	-0.644653	0.0265047	-1.66365	0.011793	-1.08638	0.0020801
1672.26	20.6729	21.1313	11.3817	11.5929	3.73781	3.86046	-0.644653	0.0264992	-1.65897	0.0117905	-1.07278	0.00207968
1673.26	20.6583	21.127	11.3817	11.5905	3.73781	3.85967	-0.653564	0.0264938	-1.64725	0.0117881	-1.06404	0.00207925
1674.26	20.6388	21.1227	11.3739	11.5882	3.72719	3.85888	-0.644653	0.0264884	-1.62178	0.0117857	-1.07388	0.00207883
1675.26	20.6193	21.1184	11.3711	11.5858	3.72108	3.8581	-0.644653	0.026483	-1.62584	0.0117833	-1.09341	0.0020784
1676.26	20.6282	21.1141	11.3798	11.5834	3.72719	3.85731	-0.647461	0.0264775	-1.63663	0.0117809	-1.09935	0.00207798
1677.26	20.6369	21.1098	11.3817	11.5811	3.7164	3.85652	-0.638718	0.0264721	-1.65709	0.0117785	-1.11795	0.00207755
1678.26	20.6271	21.1055	11.3906	11.5787	3.72719	3.85574	-0.644653	0.0264667	-1.65616	0.0117761	-1.12076	0.00207713
1679.26	20.6271	21.1012	11.3916	11.5764	3.71828	3.85495	-0.644653	0.0264613	-1.65005	0.0117737	-1.12357	0.0020767
1680.26	20.6212	21.0969	11.3848	11.574	3.72108	3.85416	-0.647461	0.0264559	-1.64725	0.0117713	-1.12544	0.00207628
1681.26	20.6146	21.0926	11.3906	11.5716	3.72719	3.85338	-0.653564	0.0264505	-1.64131	0.0117688	-1.12263	0.00207585
1682.26	20.6174	21.0882	11.3828	11.5693	3.73	3.85259	-0.644653	0.026445	-1.63756	0.0117664	-1.13841	0.00207543
1683.26	20.6165	21.0839	11.3798	11.5669	3.73593	3.8518	-0.647461	0.0264396	-1.63943	0.011764	-1.15982	0.002075
1684.26	20.6076	21.0796	11.3817	11.5646	3.72609	3.85102	-0.638718	0.0264342	-1.62178	0.0117616	-1.16873	0.00207458
1685.26	20.6146	21.0753	11.3934	11.5622	3.735	3.85023	-0.644653	0.0264288	-1.63162	0.0117592	-1.18639	0.00207415
1686.26	20.6282	21.071	11.4012	11.5599	3.73	3.84945	-0.656372	0.0264234	-1.63052	0.0117568	-1.19388	0.00207373
1687.26	20.631	21.0667	11.3864	11.5575	3.71828	3.84866	-0.635742	0.026418	-1.63943	0.0117544	-1.19716	0.0020733
1688.26	20.6221	21.0624	11.3817	11.5551	3.70937	3.84787	-0.641846	0.0264126	-1.64412	0.011752	-1.18607	0.00207288
1689.26	20.6076	21.0581	11.3739	11.5528	3.71234	3.84709	-0.642776	0.0264072	-1.64725	0.0117496	-1.16263	0.00207245
1690.26	20.6016	21.0538	11.3622	11.5504	3.71828	3.8463	-0.6595	0.0264018	-1.65303	0.0117472	-1.17342	0.00207203
1691.26	20.5819	21.0495	11.3427	11.5481	3.69562	3.84552	-0.644653	0.0263964	-1.65396	0.0117448	-1.15201	0.00207161
1692.26	20.5763	21.0452	11.3427	11.5457	3.69093	3.84473	-0.626999	0.026391	-1.65115	0.0117424	-1.15794	0.00207118
1693.26	20.5774	21.041	11.3231	11.5434	3.7164	3.84395	-0.631058	0.0263856	-1.64224	0.01174	-1.15388	0.00207076
1694.26	20.5685	21.0367	11.338	11.541	3.72719	3.84317	-0.626999	0.0263802	-1.64131	0.0117376	-1.16263	0.00207033
1695.26	20.5891	21.0324	11.3398	11.5387	3.73	3.84238	-0.636841	0.0263748	-1.65115	0.0117352	-1.16873	0.00206991
1696.26	20.5979	21.0281	11.3427	11.5363	3.74374	3.8416	-0.636841	0.0263694	-1.63943	0.0117328	-1.16263	0.00206949
1697.26	20.6087	21.0238	11.3544	11.534	3.76625	3.84081	-0.635742	0.026364	-1.65115	0.0117304	-1.15982	0.00206906
1698.26	20.6057	21.0195	11.3544	11.5316	3.76906	3.84003	-0.644653	0.0263586	-1.65115	0.011728	-1.14607	0.00206864
1699.26	20.6016	21.0152	11.3544	11.5293	3.75844	3.83925	-0.658249	0.0263532	-1.65709	0.0117256	-1.13528	0.00206822
1700.26	20.5997	21.0109	11.3395	11.5269	3.75546	3.83846	-0.675903	0.0263478	-1.65616	0.0117232	-1.12076	0.00206779
1701.26	20.5862	21.0066	11.3259	11.5246	3.74359	3.83768	-0.65918	0.0263424	-1.64835	0.0117208	-1.10591	0.00206737
1702.26	20.5654	21.0023	11.3142	11.5222	3.72108	3.8369	-0.644653	0.026337	-1.65709	0.0117184	-1.11014	0.00206695
1703.26	20.549	20.9981	11.3086	11.5199	3.70155	3.83611	-0.653564	0.0263316	-1.64835	0.011716	-1.11888	0.00206652
1704.26	20.549	20.9938	11.3184	11.5175	3.6839	3.83533	-0.650589	0.0263262	-1.65115	0.0117136	-1.12076	0.0020661
1705.26	20.5443	20.9895	11.3203	11.5152	3.68109	3.83455	-0.644653	0.0263208	-1.65709	0.0117112	-1.12967	0.00206568
1706.26	20.549	20.9852	11.3231	11.5128	3.67921	3.83377	-0.625122	0.0263155	-1.6785	0.0117088	-1.1356	0.00206526
1707.26	20.549	20.9809	11.3231	11.5105	3.67921	3.83298	-0.634033	0.0263101	-1.69022	0.0117064	-1.14622	0.00206483
1708.26	20.5579	20.9766	11.3153	11.5081	3.68515	3.8322	-0.642776	0.0263047	-1.6949	0.011704	-1.15982	0.00206441
1709.26	20.5607	20.9724	11.3036	11.5058	3.70766	3.83142	-0.64653	0.0262993	-1.69803	0.0117016	-1.1656	0.00206399
1710.26	20.549	20.9681	11.2947	11.5034	3.71046	3.83064	-0.656372	0.0262939	-1.70975	0.0116992	-1.16263	0.00206356
1711.26	20.5401	20.9638	11.2977	11.5011	3.72108	3.82986	-0.671219	0.0262885	-1.70381	0.0116968	-1.15388	0.00206314
1712.26	20.5313	20.9595	11.2947	11.4988	3.70656	3.82907	-0.683716	0.0262832	-1.6813	0.0116944	-1.15482	0.00206272
1713.26	20.5216	20.9552	11.3125	11.4964	3.70656	3.82829	-0.680588	0.0262778	-1.69022	0.011692	-1.15388	0.0020623
1714.26	20.501	20.951	11.3153	11.4941	3.69281	3.82751	-0.666992	0.0262724	-1.69803	0.0116896	-1.15794	0.00206188
1715.26	20.5099	20.9467	11.3259	11.4917	3.68983	3.82673	-0.664185	0.026267	-1.70084	0.0116872	-1.16092	0.00206145
1716.26	20.504	20.9424	11.332	11.4894	3.69594	3.82595	-0.675903	0.0262616	-1.70694	0.0116848	-1.15013	0.00206103
1717.26	20.501	20.9381	11.3408	11.487	3.69875	3.82517	-0.668869	0.0262563	-1.70975	0.0116824	-1.13748	0.00206061
1718.26	20.4904	20.9339	11.3203	11.4847	3.70155	3.82439	-0.669968	0.0262509	-1.70975	0.01168	-1.1356	0.00206019
1719.26	20.4893	20.9296	11.3095	11.4824	3.71828	3.82361	-0.65918	0.0262455	-1.70694	0.0116777	-1.1445	0.00205977
1720.26	20.4716	20.9253	11.2919	11.48	3.71828	3.82283	-0.664185	0.0262402	-1.70787	0.0116753	-1.15013	0.00205935
1721.26	20.461	20.921	11.2813	11.4777	3.71547	3.82205	-0.675903	0.0262348	-1.71866	0.0116729	-1.1492	0.00205892
1722.26	20.4708	20.9168	11.2645	11.4753	3.71828	3.82127	-0.675903	0.0262294	-1.72037	0.0116705	-1.15201	0.0020585
1723.26	20.4768	20.9125	11.2528	11.473	3.71828	3.82049	-0.675903	0.026224	-1.72224	0.0116681	-1.16685	0.00205808
1724.26	20.4669	20.9082	11.2528	11.4707	3.70155	3.81971	-0.673096	0.0262187	-1.72928	0.0116657	-1.15669	0.00205766
1725.26	20.468	20.904	11.2645	11.4683	3.67921	3.81893	-0.687622	0.0262133	-1.73396	0.0116633	-1.1431	0.00205724
1726.26	20.474	20.8997	11.2705	11.466	3.65968	3.81815	-0.695435	0.0262079	-1.73209	0.0116609	-1.13435	0.00205682
1727.26	20.4876	20.8954	11.2723	11.4637	3.65688	3.81737	-0.693558	0.0262026	-1.72334	0.0116586	-1.13841	0.0020564
1728.26	20.4885	20.8912	11.2919	11.4613	3.64609	3.81659	-0.695435	0.0261972	-1.72147	0.0116562	-1.15201	0.00205598
1729.26	20.4727	20.8869	11.2859	11.459	3.65109	3.81581	-0.697311	0.0261919	-1.70975	0.0116538	-1.15982	0.00205555
1730.26	20.4708	20.8827	11.2841	11.4567	3.67952	3.81503	-0.698242	0.0261865	-1.69302	0.0116514	-1.17467	0.00205513
1731.26	20.4619	20.8784	11.283	11.4543	3.69875	3.81425	-0.692627	0.0261811	-1.6785	0.011649	-1.18826	0.00205471
1732.26	20.468	20.8741	11.277	11.452	3.69875	3.81348	-0.687622	0.0261758	-1.67569	0.0116466	-1.19107	0.00205429
1733.26	20.4513	20.8699	11.2575	11.4496	3.69281	3.8127	-0.686523	0.0261704	-1.68443	0.0116442	-1.19388	0.00205387
1734.26	20.4318	20.8656	11.2322	11.4473	3.69093	3.81192	-0.674805	0.0261651	-1.68631	0.0116419	-1.19107	0.00205345
1735.26	20.426	20.8614	11.2234	11.445	3.69374	3.81114	-0.664185	0.0261597	-1.68741	0.0116395	-1.19295	0.00205303
1736.26	20.4201	20.8571	11.2244	11.4427	3.68202	3.81036	-0.666061	0.0261544	-1.69022	0.0116371	-1.19107	0.00205261
1737.26	20.4094	20.8528	11.2156	11.4403	3.67641	3.80959	-0.666992	0.026149	-1.69022	0.0116347	-1.21341	0.00205219
1738.26	20.3888	20.8486	11.2255	11.438	3.67921	3.80881	-0.675903	0.0261436	-1.68912	0.0116323	-1.21638	0.00205177
1739.26	20.3888	20.8443	11.2244	11.4357	3.67641	3.80803	-0.692627	0.0261383	-1.69803	0.0116299	-1.20872	0.00205135
1740.26	20.3869	20.8401	11.2411	11.4333	3.68202	3.80726	-0.698242	0.0261329	-1.68318	0.0116276	-1.19998	0.00205093
1741.26	20.386	20.8358	11.2469	11.431	3.6675	3.80648	-0.689499	0.0261276	-1.6785	0.0116252	-1.17154	0.00205051
1742.26	20.4037	20.8316	11.2587	11.4287	3.65077	3.8057	-0.695435	0.0261223	-1.6785	0.0116228	-1.16373	0.00205009
1743.26	20.4143	20.8273	11.2528	11.4263	3.64516	3.80493	-0.695435	0.0261169	-1.6785	0.0116204	-1.15794	0.00204967
1744.26	20.4279	20.8231	11.2528	11.424	3.65688	3.80415	-0.687622	0.0261116	-1.66678	0.0116181	-1.15982	0.00204925
1745.26	20.434	20.8188	11.2528	11.4217	3.65077	3.80337	-0.678711	0.0261062	-1.66678	0.0116157	-1.16451	0.00204883
1746.26	20.4455	20.8146	11.2333	11.4194	3.66281	3.8026	-0.673096	0.0261009	-1.68741	0.0116133	-1.15669	0.00204841
1747.26	20.4396	20.8103	11.2216	11.417	3.6675	3.80182	-0.702469	0.0260955	-1.70193	0.0116109	-1.17154	0.00204799
1748.26	20.4219	20.8061	11.2227	11.4147	3.66156	3.80104	-0.714966	0.0260902	-1.70084	0.0116085	-1.17342	0.00204758
1749.26	20.3916	20.8018	11.2137	11.4124	3.65077	3.80027	-0.714966	0.0260848	-1.71866	0.0116062	-1.17435	0.00204716
1750.26	20.3888	20.7976	11.2137	11.41	3.64796	3.79949	-0.714966	0.0260795	-1.741	0.0116038	-1.19217	0.00204674
1751.26	20.3604	20.7933	11.2001	11.4077	3.66389	3.79872	-0.711838	0.0260742	-1.741	0.0116014	-1.21764	0.00204632
1752.26	20.338	20.7891	11.2052	11.4054	3.68625	3.79794	-0.717773	0.0260688	-1.741	0.011599	-1.22044	0.0020459
1753.26	20.3469	20.7849	11.2081	11.4031	3.68515	3.79717	-0.707932	0.0260635	-1.72147	0.0115967	-1.2106	0.00204548
1754.26	20.338	20.7806	11.2197	11.4007	3.69594	3.79639	-0.700119	0.0260582	-1.71568	0.0115943	-1.19998	0.00204506
1755.26	20.3333	20.7764	11.2216	11.3984	3.69875	3.79562	-0.707153	0.0260528	-1.70694	0.0115919	-1.19701	0.00204464
1756.26	20.3274	20.7721	11.1961	11.3961	3.68983	3.79484	-0.706055	0.0260475	-1.69803	0.0115896	-1.19107	0.00204423
1757.26	20.3244	20.7679	11.2001	11.3938	3.68109	3.79407	-0.703247	0.0260422	-1.66959	0.0115872	-1.16451	0.00204381
1758.26	20.3274	20.7637	11.1961	11.3915	3.6703	3.7933	-0.704346	0.0260368	-1.67569	0.0115848	-1.15388	0.00204339
1759.26	20.3362	20.7594	11.1942	11.3891	3.67921	3.79252	-0.698563	0.0260315	-1.69803	0.0115824	-1.1431	0.00204297
1760.26	20.3665	20.7552	11.1806	11.3868	3.67921	3.79175	-0.712158	0.0260262	-1.71568	0.0115801	-1.1492	0.00204255
1761.26	20.3899	20.7509	11.1945	11.3845	3.69594	3.79097	-0.707153	0.0260209	-1.71756	0.0115777	-1.15794	0.00204213
1762.26	20.3916	20.7467	11.2197	11.3822	3.71046	3.7902	-0.714966	0.0260155	-1.72928	0.0115753	-1.17467	0.00204172
1763.26	20.4005	20.7425	11.2305	11.3799	3.7164	3.78943	-0.720901	0.0260102	-1.73116	0.011573	-1.19528	0.0020413
1764.26	20.3994	20.7382	11.2361	11.3775	3.71234	3.78865	-0.734497	0.0260049	-1.72147	0.0115706	-1.20592	0.00204088
1765.26	20.3888	20.734	11.2333	11.3752	3.7164	3.78788	-0.748093	0.0259996	-1.71568	0.0115682	-1.21951	0.00204046
1766.26	20.3712	20.7298	11.2273	11.3729	3.71234	3.78711	-0.746216	0.0259942	-1.69991	0.0115659	-1.21341	0.00204005
1767.26	20.3557	20.7255	11.2244	11.3706	3.70937	3.78633	-0.752151	0.0259889	-1.69803	0.0115635	-1.20467	0.00203963
1768.26	20.3548	20.7213	11.2216	11.3683	3.70656	3.78556	-0.762939	0.0259836	-1.70506	0.0115611	-1.19498	0.00203921
1769.26	20.3587	20.7171	11.2227	11.366	3.70656	3.78479	-0.765747	0.0259783	-1.70694	0.0115588	-1.19388	0.00203879
1770.26	20.3568	20.7129	11.2091	11.3636	3.71828	3.78402	-0.771683	0.025973	-1.71255	0.0115564	-1.18513	0.00203838
1771.26	20.3557	20.7086	11.2137	11.3613	3.71828	3.78324	-0.782471	0.0259676	-1.71756	0.011554	-1.18607	0.00203796
1772.26	20.3497	20.7044	11.2227	11.359	3.71828	3.78247	-0.785278	0.0259623	-1.72647	0.0115517	-1.17154	0.00203754
1773.26	20.3391	20.7002	11.2197	11.3567	3.71359	3.7817	-0.785278	0.025957	-1.72147	0.0115493	-1.19998	0.00203712
1774.26	20.3185	20.696	11.2216	11.3544	3.70766	3.78093	-0.768555	0.0259517	-1.71255	0.0115469	-1.2056	0.00203671
1775.26	20.299	20.6917	11.2216	11.3521	3.69093	3.78016	-0.759811	0.0259464	-1.71756	0.0115446	-1.19107	0.00203629
1776.26	20.2794	20.6875	11.2262	11.3497	3.67921	3.77939	-0.743088	0.0259411	-1.72459	0.0115422	-1.18326	0.00203587
1777.26	20.251	20.6833	11.2333	11.3474	3.65968	3.77861	-0.729492	0.0259358	-1.73116	0.0115398	-1.19107	0.00203546
1778.26	20.2376	20.6791	11.2361	11.3451	3.63312	3.77784	-0.71965	0.0259305	-1.72319	0.0115375	-1.19107	0.00203504
1779.26	20.2404	20.6748	11.2273	11.3428	3.63124	3.77707	-0.714966	0.0259252	-1.72224	0.0115351	-1.17154	0.00203462
1780.26	20.2268	20.6706	11.2361	11.3405	3.6225	3.7763	-0.714966	0.0259199	-1.72334	0.0115328	-1.18045	0.00203421
1781.26	20.2258	20.6664	11.2273	11.3382	3.61171	3.77553	-0.726685	0.0259145	-1.70662	0.0115304	-1.20279	0.00203379
1782.26	20.2435	20.6622	11.2166	11.3359	3.6089	3.77476	-0.726685	0.0259092	-1.69772	0.011528	-1.21764	0.00203337
1783.26	20.263	20.658	11.2109	11.3336	3.6089	3.77399	-0.734497	0.0259039	-1.68912	0.0115257	-1.22826	0.00203296
1784.26	20.2688	20.6538	11.2059	11.3313	3.63547	3.77322	-0.726685	0.0258986	-1.6785	0.0115233	-1.23013	0.00203254
1785.26	20.2716	20.6495	11.1942	11.3289	3.64796	3.77245	-0.734497	0.0258933	-1.67256	0.011521	-1.23592	0.00203213
1786.26	20.2627	20.6453	11.1778	11.3266	3.66859	3.77168	-0.746216	0.025888	-1.69022	0.0115186	-1.22232	0.00203171
1787.26	20.2482	20.6411	11.1778	11.3243	3.67921	3.77091	-0.746216	0.0258827	-1.69615	0.0115162	-1.22232	0.00203129
1788.26	20.2482	20.6369	11.1825	11.322	3.68202	3.77014	-0.746216	0.0258774	-1.6963	0.0115139	-1.21451	0.00203088
1789.26	20.2344	20.6327	11.1719	11.3197	3.6839	3.76937	-0.746216	0.0258721	-1.69615	0.0115115	-1.19388	0.00203046
1790.26	20.2326	20.6285	11.1611	11.3174	3.67921	3.7686	-0.755127	0.0258669	-1.69913	0.0115092	-1.20279	0.00203005
1791.26	20.2326	20.6243	11.1512	11.3151	3.67921	3.76783	-0.761063	0.0258616	-1.69615	0.0115068	-1.2117	0.00202963
1792.26	20.2385	20.6201	11.1434	11.3128	3.67328	3.76707	-0.76387	0.0258563	-1.6785	0.0115045	-1.22232	0.00202922
1793.26	20.2422	20.6159	11.1258	11.3105	3.68515	3.7663	-0.762939	0.025851	-1.66678	0.0115021	-1.23404	0.0020288
1794.26	20.2315	20.6116	11.1161	11.3082	3.69594	3.76553	-0.771683	0.0258457	-1.64412	0.0114998	-1.21341	0.00202839
1795.26	20.2197	20.6074	11.1072	11.3059	3.70468	3.76476	-0.762939	0.0258404	-1.63943	0.0114974	-1.2106	0.00202797
1796.26	20.2305	20.6032	11.0778	11.3036	3.71828	3.76399	-0.768875	0.0258351	-1.63943	0.011495	-1.17622	0.00202756
1797.26	20.2138	20.599	11.0583	11.3013	3.71234	3.76322	-0.782471	0.0258298	-1.62772	0.0114927	-1.16373	0.00202714
1798.26	20.1943	20.5948	11.0536	11.299	3.7164	3.76246	-0.783401	0.0258245	-1.63663	0.0114903	-1.14029	0.00202673
1799.26	20.1807	20.5906	11.0369	11.2967	3.71828	3.76169	-0.785278	0.0258192	-1.64537	0.011488	-1.14139	0.00202631
1800.26	20.1985	20.5864	11.0106	11.2944	3.70656	3.76092	-0.77356	0.025814	-1.67099	0.0114856	-1.13951	0.0020259
1801.26	20.1896	20.5822	11.0028	11.2921	3.70766	3.76015	-0.77356	0.0258087	-1.6785	0.0114833	-1.1442	0.00202548
1802.26	20.1955	20.578	10.9833	11.2898	3.70578	3.75939	-0.767624	0.0258034	-1.68912	0.0114809	-1.17857	0.00202507
1803.26	20.1896	20.5738	10.9864	11.2875	3.72531	3.75862	-0.768555	0.0257981	-1.68631	0.0114786	-1.18326	0.00202465
1804.26	20.1868	20.5696	11	11.2852	3.71938	3.75785	-0.756836	0.0257928	-1.69209	0.0114762	-1.1981	0.00202424
1805.26	20.1896	20.5654	11.0028	11.2829	3.70859	3.75708	-0.748093	0.0257876	-1.66365	0.0114739	-1.21341	0.00202382
1806.26	20.1896	20.5612	11.0145	11.2806	3.70766	3.75632	-0.746216	0.0257823	-1.65005	0.0114715	-1.21638	0.00202341
1807.26	20.1877	20.557	11.0294	11.2783	3.69093	3.75555	-0.746216	0.025777	-1.62772	0.0114692	-1.21451	0.002023
1808.26	20.1779	20.5528	11.0489	11.276	3.68515	3.75478	-0.746216	0.0257717	-1.60818	0.0114668	-1.20872	0.00202258
1809.26	20.1868	20.5486	11.0614	11.2737	3.68703	3.75402	-0.749344	0.0257664	-1.6035	0.0114645	-1.19888	0.00202217
1810.26	20.1747	20.5444	11.082	11.2714	3.67328	3.75325	-0.762939	0.0257612	-1.6171	0.0114622	-1.20779	0.00202175
1811.26	20.1701	20.5403	11.0731	11.2691	3.67921	3.75249	-0.771683	0.0257559	-1.6199	0.0114598	-1.20279	0.00202134
1812.26	20.1565	20.5361	11.0642	11.2668	3.6703	3.75172	-0.780594	0.0257506	-1.62694	0.0114575	-1.2106	0.00202093
1813.26	20.1329	20.5319	11.0672	11.2645	3.67921	3.75096	-0.782471	0.0257454	-1.65115	0.0114551	-1.21654	0.00202051
1814.26	20.1447	20.5277	11.0653	11.2622	3.67921	3.75019	-0.785278	0.0257401	-1.6649	0.0114528	-1.21529	0.0020201
1815.26	20.1466	20.5235	11.0731	11.2599	3.67328	3.74942	-0.756836	0.0257348	-1.69209	0.0114504	-1.20467	0.00201969
1816.26	20.1555	20.5193	11.0802	11.2576	3.66249	3.74866	-0.754028	0.0257296	-1.67537	0.0114481	-1.20279	0.00201927
1817.26	20.1505	20.5151	11.0908	11.2553	3.66437	3.74789	-0.754028	0.0257243	-1.67068	0.0114457	-1.20279	0.00201886
1818.26	20.1583	20.5109	11.0898	11.253	3.65968	3.74713	-0.754028	0.025719	-1.66959	0.0114434	-1.19388	0.00201845
1819.26	20.1643	20.5067	11.0986	11.2507	3.63124	3.74636	-0.759811	0.0257138	-1.65897	0.0114411	-1.19107	0.00201803
1820.26	20.1602	20.5026	11.0927	11.2484	3.63734	3.7456	-0.7509	0.0257085	-1.63943	0.0114387	-1.19107	0.00201762
1821.26	20.1565	20.4984	11.0809	11.2461	3.62843	3.74484	-0.757935	0.0257032	-1.63663	0.0114364	-1.18513	0.00201721
1822.26	20.1583	20.4942	11.0867	11.2438	3.63437	3.74407	-0.757935	0.025698	-1.65428	0.011434	-1.19498	0.00201679
1823.26	20.1673	20.49	11.0908	11.2415	3.63734	3.74331	-0.749023	0.0256927	-1.65005	0.0114317	-1.19498	0.00201638
1824.26	20.1673	20.4858	11.1005	11.2393	3.63124	3.74254	-0.746216	0.0256875	-1.64725	0.0114294	-1.19498	0.00201597
1825.26	20.176	20.4817	11.0945	11.237	3.6225	3.74178	-0.737305	0.0256822	-1.65616	0.011427	-1.18919	0.00201556
1826.26	20.179	20.4775	11.0837	11.2347	3.62062	3.74102	-0.751221	0.0256769	-1.65897	0.0114247	-1.18826	0.00201514
1827.26	20.1533	20.4733	11.082	11.2324	3.62062	3.74025	-0.754028	0.0256717	-1.6649	0.0114223	-1.19107	0.00201473
1828.26	20.1388	20.4691	11.0908	11.2301	3.59218	3.73949	-0.765747	0.0256664	-1.66084	0.01142	-1.18326	0.00201432
1829.26	20.1271	20.4649	11.0731	11.2278	3.58937	3.73873	-0.765747	0.0256612	-1.67662	0.0114177	-1.17747	0.00201391
1830.26	20.1212	20.4608	11.0614	11.2255	3.57765	3.73796	-0.774658	0.0256559	-1.66084	0.0114153	-1.17342	0.00201349
1831.26	20.1026	20.4566	11.0625	11.2232	3.57484	3.7372	-0.777466	0.0256507	-1.66177	0.011413	-1.16373	0.00201308
1832.26	20.0927	20.4524	11.0447	11.2209	3.56093	3.73644	-0.777466	0.0256454	-1.66084	0.0114107	-1.17435	0.00201267
1833.26	20.0849	20.4482	11.0359	11.2187	3.55219	3.73568	-0.777466	0.0256402	-1.66959	0.0114083	-1.18045	0.00201226
1834.26	20.0862	20.4441	11.0134	11.2164	3.56516	3.73491	-0.785278	0.0256349	-1.68741	0.011406	-1.18919	0.00201185
1835.26	20.0821	20.4399	11.0047	11.2141	3.56406	3.73415	-0.791214	0.0256297	-1.6813	0.0114036	-1.20779	0.00201143
1836.26	20.0919	20.4357	10.9939	11.2118	3.56703	3.73339	-0.793091	0.0256244	-1.6785	0.0114013	-1.22826	0.00201102
1837.26	20.0919	20.4315	10.9833	11.2095	3.55812	3.73263	-0.785278	0.0256192	-1.66678	0.011399	-1.25858	0.00201061
1838.26	20.0862	20.4274	10.9864	11.2072	3.57875	3.73187	-0.785278	0.0256139	-1.65897	0.0113966	-1.27029	0.0020102
1839.26	20.0685	20.4232	10.9911	11.205	3.56984	3.7311	-0.779343	0.0256087	-1.66084	0.0113943	-1.2731	0.00200979
1840.26	20.0626	20.419	11	11.2027	3.58156	3.73034	-0.768555	0.0256035	-1.65584	0.011392	-1.26701	0.00200938
1841.26	20.049	20.4149	10.995	11.2004	3.58749	3.72958	-0.765747	0.0255982	-1.65396	0.0113897	-1.24654	0.00200897
1842.26	20.0354	20.4107	10.9981	11.1981	3.59828	3.72882	-0.764648	0.025593	-1.64412	0.0113873	-1.23592	0.00200855
1843.26	20.0177	20.4065	11.007	11.1958	3.61594	3.72806	-0.755905	0.0255877	-1.65005	0.011385	-1.22513	0.00200814
1844.26	20.0188	20.4024	11.0205	11.1935	3.62375	3.7273	-0.746216	0.0255825	-1.65193	0.0113827	-1.21638	0.00200773
1845.26	20.0365	20.3982	11.0341	11.1913	3.63547	3.72654	-0.741531	0.0255773	-1.64725	0.0113803	-1.2056	0.00200732
1846.26	20.0443	20.3941	11.0223	11.189	3.64015	3.72578	-0.725586	0.025572	-1.63943	0.011378	-1.20279	0.00200691
1847.26	20.0462	20.3899	11.0419	11.1867	3.64906	3.72502	-0.70903	0.0255668	-1.6335	0.0113757	-1.19998	0.0020065
1848.26	20.0412	20.3857	11.0477	11.1844	3.66562	3.72426	-0.686523	0.0255616	-1.63756	0.0113733	-1.20091	0.00200609
1849.26	20.0412	20.3816	11.0475	11.1821	3.6675	3.7235	-0.683716	0.0255563	-1.62881	0.011371	-1.19998	0.00200568
1850.26	20.0354	20.3774	11.0419	11.1799	3.67641	3.72274	-0.703247	0.0255511	-1.64647	0.0113687	-1.20279	0.00200527
1851.26	20.0372	20.3733	11.0359	11.1776	3.69093	3.72198	-0.70903	0.0255459	-1.65709	0.0113664	-1.1981	0.00200486
1852.26	20.0146	20.3691	11.0341	11.1753	3.69687	3.72122	-0.714966	0.0255407	-1.67099	0.011364	-1.21764	0.00200445
1853.26	20.0099	20.3649	11.04	11.173	3.69281	3.72046	-0.726685	0.0255354	-1.68553	0.0113617	-1.22232	0.00200404
1854.26	20.0177	20.3608	11.0223	11.1708	3.69093	3.7197	-0.743088	0.0255302	-1.6785	0.0113594	-1.22232	0.00200363
1855.26	20.0099	20.3566	11.0313	11.1685	3.69093	3.71894	-0.731369	0.025525	-1.68741	0.0113571	-1.22232	0.00200322
1856.26	20.004	20.3525	11.0341	11.1662	3.69093	3.71818	-0.737305	0.0255197	-1.68443	0.0113547	-1.22232	0.00200281
1857.26	19.9963	20.3483	11.0341	11.1639	3.69093	3.71742	-0.726685	0.0255145	-1.68741	0.0113524	-1.20747	0.0020024
1858.26	19.9982	20.3442	11.0341	11.1616	3.67921	3.71667	-0.743408	0.0255093	-1.69615	0.0113501	-1.20279	0.00200199
1859.26	19.9982	20.34	11.0251	11.1594	3.67734	3.71591	-0.744339	0.0255041	-1.70694	0.0113478	-1.20169	0.00200158
1860.26	20.013	20.3359	11.0242	11.1571	3.6675	3.71515	-0.741531	0.0254989	-1.72647	0.0113454	-1.19998	0.00200117
1861.26	20.0188	20.3317	11.0192	11.1548	3.65688	3.71439	-0.731689	0.0254936	-1.741	0.0113431	-1.18919	0.00200076
1862.26	20.0247	20.3276	11.0056	11.1526	3.64015	3.71363	-0.740433	0.0254884	-1.7438	0.0113408	-1.19998	0.00200035
1863.26	20.0326	20.3234	10.9773	11.1503	3.62531	3.71287	-0.748093	0.0254832	-1.74881	0.0113385	-1.20279	0.00199994
1864.26	20.0443	20.3193	10.9637	11.148	3.6089	3.71212	-0.749023	0.025478	-1.741	0.0113362	-1.20279	0.00199953
1865.26	20.0294	20.3151	10.9548	11.1457	3.60109	3.71136	-0.754028	0.0254728	-1.72928	0.0113338	-1.19998	0.00199912
1866.26	20.004	20.311	10.952	11.1435	3.59218	3.7106	-0.754028	0.0254676	-1.70975	0.0113315	-1.20279	0.00199871
1867.26	19.9932	20.3068	10.952	11.1412	3.59718	3.70984	-0.762939	0.0254624	-1.69022	0.0113292	-1.20279	0.0019983
1868.26	19.9787	20.3027	10.9461	11.1389	3.59718	3.70909	-0.765747	0.0254571	-1.6785	0.0113269	-1.20279	0.00199789
1869.26	19.9619	20.2985	10.9353	11.1367	3.58937	3.70833	-0.772781	0.0254519	-1.67068	0.0113246	-1.18919	0.00199748
1870.26	19.9297	20.2944	10.9236	11.1344	3.61781	3.70757	-0.768875	0.0254467	-1.65584	0.0113222	-1.18326	0.00199707
1871.26	19.9201	20.2903	10.9148	11.1321	3.64015	3.70682	-0.774658	0.0254415	-1.65005	0.0113199	-1.18326	0.00199667
1872.26	19.9052	20.2861	10.9052	11.1298	3.65077	3.70606	-0.777466	0.0254363	-1.64412	0.0113176	-1.19107	0.00199626
1873.26	19.9005	20.282	10.8903	11.1276	3.67328	3.70531	-0.777466	0.0254311	-1.65303	0.0113153	-1.20279	0.00199585
1874.26	19.9083	20.2778	10.8856	11.1253	3.6839	3.70455	-0.765747	0.0254259	-1.65584	0.011313	-1.22232	0.00199544
1875.26	19.926	20.2737	10.8994	11.123	3.68484	3.70379	-0.756836	0.0254207	-1.65288	0.0113107	-1.23904	0.00199503
1876.26	19.9279	20.2696	10.9148	11.1208	3.65843	3.70304	-0.737305	0.0254155	-1.66084	0.0113083	-1.25951	0.00199462
1877.26	19.9368	20.2654	10.9247	11.1185	3.64484	3.70228	-0.736374	0.0254103	-1.66177	0.011306	-1.25858	0.00199422
1878.26	19.9455	20.2613	10.9306	11.1162	3.61453	3.70153	-0.752151	0.0254051	-1.66678	0.0113037	-1.26138	0.00199381
1879.26	19.9297	20.2572	10.9414	11.114	3.59125	3.70077	-0.761841	0.0253999	-1.65897	0.0113014	-1.25357	0.0019934
1880.26	19.9111	20.253	10.9501	11.1117	3.57765	3.70002	-0.77356	0.0253947	-1.67569	0.0112991	-1.23294	0.00199299
1881.26	19.9024	20.2489	10.9492	11.1095	3.57578	3.69926	-0.779343	0.0253895	-1.69443	0.0112968	-1.22232	0.00199258
1882.26	19.9005	20.2448	10.9531	11.1072	3.57484	3.69851	-0.788086	0.0253843	-1.72272	0.0112945	-1.2106	0.00199218
1883.26	19.8935	20.2406	10.9619	11.1049	3.57875	3.69775	-0.77356	0.0253791	-1.74725	0.0112922	-1.2106	0.00199177
1884.26	19.8916	20.2365	10.952	11.1027	3.57578	3.697	-0.767624	0.0253739	-1.77255	0.0112898	-1.2117	0.00199136
1885.26	19.8946	20.2324	10.952	11.1004	3.57875	3.69624	-0.746216	0.0253687	-1.78319	0.0112875	-1.20279	0.00199095
1886.26	19.8827	20.2282	10.9591	11.0981	3.58156	3.69549	-0.725586	0.0253635	-1.80272	0.0112852	-1.18216	0.00199054
1887.26	19.8818	20.2241	10.9461	11.0959	3.58749	3.69473	-0.729813	0.0253583	-1.80147	0.0112829	-1.17154	0.00199014
1888.26	19.8818	20.22	10.9247	11.0936	3.59718	3.69398	-0.743408	0.0253531	-1.79068	0.0112806	-1.15982	0.00198973
1889.26	19.874	20.2159	10.9247	11.0914	3.60609	3.69323	-0.734497	0.0253479	-1.78474	0.0112783	-1.15982	0.00198932
1890.26	19.8771	20.2117	10.9158	11.0891	3.61484	3.69247	-0.741531	0.0253428	-1.77412	0.011276	-1.15982	0.00198892
1891.26	19.8829	20.2076	10.8981	11.0868	3.62563	3.69172	-0.737305	0.0253376	-1.76334	0.0112737	-1.15982	0.00198851
1892.26	19.9005	20.2035	10.8833	11.0846	3.61952	3.69097	-0.754028	0.0253324	-1.75162	0.0112714	-1.18045	0.0019881
1893.26	19.9065	20.1994	10.8591	11.0823	3.60297	3.69021	-0.746994	0.0253272	-1.75772	0.0112691	-1.18326	0.00198769
1894.26	19.8977	20.1952	10.8483	11.0801	3.59218	3.68946	-0.74231	0.025322	-1.76053	0.0112668	-1.18326	0.00198729
1895.26	19.9005	20.1911	10.8562	11.0778	3.57765	3.68871	-0.751221	0.0253168	-1.74881	0.0112645	-1.18794	0.00198688
1896.26	19.8888	20.187	10.8395	11.0755	3.56281	3.68795	-0.768555	0.0253117	-1.74881	0.0112621	-1.17435	0.00198647
1897.26	19.8752	20.1829	10.8408	11.0733	3.55219	3.6872	-0.780594	0.0253065	-1.74881	0.0112598	-1.17154	0.00198607
1898.26	19.8516	20.1788	10.877	11.071	3.55624	3.68645	-0.809021	0.0253013	-1.75162	0.0112575	-1.17154	0.00198566
1899.26	19.8349	20.1746	10.9102	11.0688	3.56984	3.6857	-0.824341	0.0252961	-1.75069	0.0112552	-1.15388	0.00198525
1900.26	19.8213	20.1705	10.913	11.0665	3.55812	3.68494	-0.824341	0.0252909	-1.76053	0.0112529	-1.1431	0.00198485
1901.26	19.8079	20.1664	10.9012	11.0643	3.55812	3.68419	-0.824341	0.0252858	-1.78006	0.0112506	-1.1492	0.00198444
1902.26	19.8088	20.1623	10.8934	11.062	3.56703	3.68344	-0.824341	0.0252806	-1.78287	0.0112483	-1.1442	0.00198404
1903.26	19.8107	20.1582	10.865	11.0598	3.56093	3.68269	-0.809494	0.0252754	-1.79366	0.011246	-1.13528	0.00198363
1904.26	19.8255	20.1541	10.8367	11.0575	3.54327	3.68194	-0.789963	0.0252702	-1.79959	0.0112437	-1.1431	0.00198322
1905.26	19.8469	20.15	10.8259	11.0552	3.53859	3.68119	-0.777466	0.0252651	-1.79178	0.0112414	-1.1492	0.00198282
1906.26	19.8557	20.1458	10.8114	11.053	3.55922	3.68043	-0.768555	0.0252599	-1.79959	0.0112391	-1.16685	0.00198241
1907.26	19.8665	20.1417	10.8203	11.0507	3.55624	3.67968	-0.759811	0.0252547	-1.79068	0.0112368	-1.15982	0.00198201
1908.26	19.8763	20.1376	10.8291	11.0485	3.55219	3.67893	-0.757935	0.0252496	-1.79678	0.0112345	-1.15982	0.0019816
1909.26	19.893	20.1335	10.8445	11.0462	3.55624	3.67818	-0.765747	0.0252444	-1.79959	0.0112322	-1.17154	0.0019812
1910.26	19.8958	20.1294	10.8427	11.044	3.57297	3.67743	-0.768555	0.0252392	-1.8024	0.0112299	-1.15201	0.00198079
1911.26	19.8841	20.1253	10.8427	11.0417	3.57172	3.67668	-0.774658	0.0252341	-1.81319	0.0112276	-1.15982	0.00198038
1912.26	19.8674	20.1212	10.8544	11.0395	3.56093	3.67593	-0.798248	0.0252289	-1.8024	0.0112253	-1.17154	0.00197998
1913.26	19.8576	20.1171	10.8486	11.0372	3.55812	3.67518	-0.821533	0.0252237	-1.79256	0.011223	-1.17154	0.00197957
1914.26	19.831	20.113	10.8683	11.035	3.55031	3.67443	-0.833252	0.0252186	-1.79959	0.0112207	-1.17154	0.00197917
1915.26	19.7977	20.1089	10.8692	11.0327	3.53546	3.67368	-0.841995	0.0252134	-1.79959	0.0112184	-1.17154	0.00197876
1916.26	19.7763	20.1048	10.8692	11.0305	3.52187	3.67293	-0.843872	0.0252082	-1.78787	0.0112161	-1.17154	0.00197836
1917.26	19.7627	20.1007	10.8603	11.0282	3.51312	3.67218	-0.855591	0.0252031	-1.78006	0.0112138	-1.18326	0.00197795
1918.26	19.7333	20.0966	10.8622	11.026	3.51125	3.67143	-0.849655	0.0251979	-1.78897	0.0112115	-1.18326	0.00197755
1919.26	19.7208	20.0925	10.8562	11.0237	3.50546	3.67068	-0.853714	0.0251928	-1.79771	0.0112093	-1.19107	0.00197714
1920.26	19.7162	20.0884	10.8533	11.0215	3.50453	3.66993	-0.855591	0.0251876	-1.79959	0.011207	-1.19217	0.00197674
1921.26	19.724	20.0843	10.8367	11.0193	3.50734	3.66919	-0.849655	0.0251825	-1.80147	0.0112047	-1.20091	0.00197633
1922.26	19.7258	20.0802	10.8337	11.017	3.51437	3.66844	-0.853714	0.0251773	-1.82303	0.0112024	-1.19998	0.00197593
1923.26	19.724	20.0761	10.8309	11.0148	3.51625	3.66769	-0.837936	0.0251722	-1.81725	0.0112001	-1.20872	0.00197553
1924.26	19.7208	20.072	10.8172	11.0125	3.51125	3.66694	-0.841995	0.025167	-1.8074	0.0111978	-1.22545	0.00197512
1925.26	19.724	20.0679	10.8153	11.0103	3.49062	3.66619	-0.855591	0.0251618	-1.8074	0.0111955	-1.21951	0.00197472
1926.26	19.724	20.0638	10.8153	11.008	3.48187	3.66544	-0.855591	0.0251567	-1.78006	0.0111932	-1.22232	0.00197431
1927.26	19.724	20.0597	10.8153	11.0058	3.48	3.6647	-0.843872	0.0251516	-1.77725	0.0111909	-1.21341	0.00197391
1928.26	19.7091	20.0556	10.8212	11.0035	3.48593	3.66395	-0.855591	0.0251464	-1.78006	0.0111886	-1.19107	0.00197351
1929.26	19.7091	20.0515	10.8231	11.0013	3.49953	3.6632	-0.875122	0.0251413	-1.78006	0.0111863	-1.16451	0.0019731
1930.26	19.7063	20.0474	10.8309	10.9991	3.51625	3.66245	-0.869186	0.0251361	-1.786	0.011184	-1.15388	0.0019727
1931.26	19.6776	20.0433	10.8161	10.9968	3.53671	3.66171	-0.866211	0.025131	-1.78787	0.0111818	-1.16373	0.00197229
1932.26	19.6552	20.0392	10.8114	10.9946	3.53265	3.66096	-0.860275	0.0251258	-1.78194	0.0111795	-1.15013	0.00197189
1933.26	19.6388	20.0351	10.8231	10.9923	3.51125	3.66021	-0.84668	0.0251207	-1.786	0.0111772	-1.15201	0.00197149
1934.26	19.6447	20.031	10.8231	10.9901	3.49062	3.65946	-0.843872	0.0251155	-1.78787	0.0111749	-1.15388	0.00197108
1935.26	19.636	20.027	10.8231	10.9879	3.47296	3.65872	-0.843872	0.0251104	-1.78194	0.0111726	-1.1442	0.00197068
1936.26	19.6399	20.0229	10.8203	10.9856	3.45155	3.65797	-0.837936	0.0251053	-1.76521	0.0111703	-1.1442	0.00197028
1937.26	19.6576	20.0188	10.8291	10.9834	3.42218	3.65722	-0.81543	0.0251001	-1.7438	0.011168	-1.16373	0.00196987
[truncated: 1,063 more rows]

## Sheet: N501Y
Times	50 nM	50 nM-Fit	20 nM	20 nM-Fit	10 nM	10 nM-Fit	5 nM	5 nM-Fit	2 nM	2 nM-Fit	1 nM	1 nM-Fit
-60.88	-0.0933228	0	-0.257736	0	-0.250458	0	-0.187027	0	-0.315475	0	-0.352036	0
-59.88	-0.061676	0	-0.254913	0	-0.214523	0	-0.152954	0	-0.3004	0	-0.315552	0
-58.88	-0.0302734	0	-0.241714	0	-0.175858	0	-0.123978	0	-0.281265	0	-0.281326	0
-57.88	-0.027298	0	-0.226639	0	-0.163589	0	-0.121002	0	-0.273834	0	-0.22757	0
-56.88	-0.003479	0	-0.194992	0	-0.136795	0	-0.106873	0	-0.257278	0	-0.199142	0
-55.88	0.00840759	0	-0.136566	0	-0.124908	0	-0.093277	0	-0.242584	0	-0.191711	0
-54.88	0.00840759	0	-0.0854645	0	-0.124908	0	-0.0897522	0	-0.238129	0	-0.179993	0
-53.88	0.0396576	0	-0.0585175	0	-0.105377	0	-0.0853119	0	-0.218597	0	-0.164764	0
-52.88	0.0470734	0	-0.04422	0	-0.105225	0	-0.0795288	0	-0.206345	0	-0.160309	0
-51.88	0.0548859	0	-0.04422	0	-0.121796	0	-0.0657806	0	-0.203369	0	-0.157349	0
-50.88	0.0476227	0	-0.0470276	0	-0.134048	0	-0.0510864	0	-0.208206	0	-0.145233	0
-49.88	0.0383301	0	-0.0587463	0	-0.137024	0	-0.048111	0	-0.199066	0	-0.145233	0
-48.88	0.0280914	0	-0.0635986	0	-0.137024	0	-0.0421753	0	-0.176575	0	-0.145233	0
-47.88	0.00370789	0	-0.0831299	0	-0.151718	0	-0.0432739	0	-0.172119	0	-0.145233	0
-46.88	-0.0202637	0	-0.0948486	0	-0.136627	0	-0.0436707	0	-0.1604	0	-0.157501	0
-45.88	-0.0310516	0	-0.102661	0	-0.114685	0	-0.0559235	0	-0.167664	0	-0.145386	0
-44.88	-0.0383148	0	-0.109528	0	-0.113037	0	-0.0510864	0	-0.164856	0	-0.13649	0
-43.88	-0.0427704	0	-0.113983	0	-0.124756	0	-0.0462494	0	-0.148132	0	-0.121399	0
-42.88	-0.047226	0	-0.107269	0	-0.14093	0	-0.0432739	0	-0.145172	0	-0.125702	0
-41.88	-0.0423737	0	-0.112656	0	-0.121948	0	-0.0559235	0	-0.159851	0	-0.125702	0
-40.88	-0.0306549	0	-0.10968	0	-0.129211	0	-0.0462494	0	-0.152588	0	-0.125702	0
-39.88	-0.0228424	0	-0.114136	0	-0.124908	0	-0.0432739	0	-0.144775	0	-0.113983	0
-38.88	-0.0184021	0	-0.110229	0	-0.117096	0	-0.0432739	0	-0.133057	0	-0.106171	0
-37.88	-0.0198822	0	-0.0979614	0	-0.102417	0	-0.0360107	0	-0.144775	0	-0.0992889	0
-36.88	-0.0276947	0	-0.0935211	0	-0.105377	0	-0.0194397	0	-0.144928	0	-0.0974274	0
-35.88	-0.0262146	0	-0.0950012	0	-0.105377	0	0.0118103	0	-0.12149	0	-0.0989075	0
-34.88	-0.0276947	0	-0.0983582	0	-0.102417	0	0.00750732	0	-0.128754	0	-0.0970306	0
-33.88	-0.0111237	0	-0.0979614	0	-0.0931244	0	0.0118103	0	-0.128754	0	-0.103363	0
-32.88	0.00395203	0	-0.0905457	0	-0.0858459	0	0.0313416	0	-0.128754	0	-0.104843	0
-31.88	0.0201263	0	-0.0979614	0	-0.0780334	0	0.0264893	0	-0.120941	0	-0.101868	0
-30.88	0.0279388	0	-0.0901489	0	-0.0633545	0	0.0118103	0	-0.106262	0	-0.0916443	0
-29.88	0.0206604	0	-0.0828857	0	-0.0467834	0	9.15527e-05	0	-0.101807	0	-0.0774994	0
-28.88	0.00450134	0	-0.0784302	0	-0.0471802	0	9.15527e-05	0	-0.0969696	0	-0.0481262	0
-27.88	-0.000900269	0	-0.071167	0	-0.0467834	0	-0.0121765	0	-0.0818787	0	-0.0436707	0
-26.88	0.00112915	0	-0.0546112	0	-0.019989	0	-0.0194397	0	-0.0744629	0	-0.0271149	0
-25.88	0.00395203	0	-0.0516357	0	-0.0038147	0	-0.0190582	0	-0.0671997	0	-0.028595	0
-24.88	0.0205078	0	-0.0423431	0	0.0157166	0	-0.0121765	0	-0.0506287	0	-0.0237427	0
-23.88	0.035202	0	-0.0321045	0	0.0307922	0	0.0121918	0	-0.0432129	0	-0.00421143	0
-22.88	0.0444946	0	-0.0321045	0	0.0478973	0	0.0264893	0	-0.0506287	0	-0.00421143	0
-21.88	0.0430145	0	-0.0276489	0	0.058136	0	0.0240631	0	-0.0476685	0	-0.00421143	0
-20.88	0.0547333	0	-0.0159302	0	0.0547791	0	0.0313416	0	-0.0389099	0	-0.00421143	0
-19.88	0.0523071	0	0.00360107	0	0.0508728	0	0.0387573	0	-0.0389099	0	-0.0213318	0
-18.88	0.062149	0	0.0110168	0	0.038208	0	0.0343018	0	-0.0389099	0	-0.000305176	0
-17.88	0.0591888	0	0.00656128	0	0.0307922	0	0.0270386	0	-0.0310974	0	-0.000305176	0
-16.88	0.0474701	0	0.0158539	0	0.0279694	0	0.0196228	0	-0.0232849	0	-0.000305176	0
-15.88	0.0279388	0	0.0143738	0	0.0039978	0	0.0343018	0	-0.00430298	0	0.00750732	0
-14.88	0.0113678	0	0.0110168	0	0.011261	0	0.0192261	0	0.00796509	0	0.0270386	0
-13.88	-0.0105896	0	-0.0085144	0	-0.000457764	0	-0.000305176	0	0.0148315	0	0.0417175	0
-12.88	-0.00816345	0	-0.0110931	0	0.00883484	0	-0.0198364	0	0.0124054	0	0.0266418	0
-11.88	-0.0154266	0	0.00210571	0	0.0118103	0	-0.0149994	0	0.00311279	0	0.0197601	0
-10.88	-0.00816345	0	0.00413513	0	0.0142212	0	-0.024292	0	0.0118713	0	0.0149231	0
-9.88	0.00112915	0	0.00656128	0	0.0157166	0	-0.0272522	0	-0.00469971	0	-0.0163269	0
-8.88	-0.00816345	0	-0.00811768	0	0.00843811	0	-0.0194397	0	0.0245209	0	-0.0553894	0
-7.88	-0.0646515	0	-0.367889	0	-0.098114	0	-0.152649	0	0.0656128	0	-0.20343	0
-6.88	-0.197922	0	-0.470551	0	-0.119919	0	-0.247803	0	-0.346725	0	-0.25	0
-5.88	0.0515289	0	0.242813	0	-0.0209351	0	0.10141	0	-0.0343781	0	0.0794525	0
-4.88	0.249023	0	0.599457	0	0.169067	0	0.386017	0	0.245453	0	0.315628	0
-3.88	0.336288	0	0.564926	0	0.480164	0	0.448685	0	0.444046	0	0.607117	0
-2.88	0.0484009	0	0.163055	0	0.177353	0	-0.0475769	0	0.355377	0	0.493744	0
-1.88	-0.420898	0	-0.108353	0	-0.362335	0	-0.354675	0	-0.610168	0	-0.634293	0
-0.879997	-0.125732	0	0.217819	0	-0.0301514	0	0.037735	0	-0.304077	0	-0.236176	0
0.120003	-3.86676	1.01642	-12.9784	2.38762	-3.2007	0.309057	-37.1206	-0.131188	0.0390472	-0.4012	-6.73929	0.2505
1.12	-9.15433	1.42736	-13.8979	2.5403	-28.1904	0.364504	-4.28952	-0.122828	-53.9411	-0.401197	-13.5834	0.250521
2.12	-5.73308	1.8368	-15.0204	2.69275	-13.3844	0.419909	-19.9628	-0.114471	-78.338	-0.401195	-10.1676	0.250543
3.12	-3.24106	2.24475	-9.0139	2.84498	-11.5873	0.475271	-10.0055	-0.106118	-41.2426	-0.401192	-6.01024	0.250564
4.12	-0.240265	2.6512	-3.58359	2.99698	-5.26476	0.530591	-4.80437	-0.0977688	-14.6311	-0.401189	-2.3739	0.250585
5.12	1.25145	3.05616	-1.34492	3.14875	-2.56108	0.585868	-2.83679	-0.0894226	-5.38789	-0.401187	-0.941483	0.250607
6.12	2.1591	3.45965	-0.308197	3.3003	-1.53249	0.641102	-1.91992	-0.0810798	-2.57829	-0.401184	-0.334534	0.250628
7.12	2.83902	3.86165	0.295319	3.45162	-0.966553	0.696294	-1.42694	-0.0727403	-1.52345	-0.401181	0.0414124	0.250649
8.12	3.41676	4.26219	0.701019	3.60271	-0.641556	0.751444	-1.17711	-0.0644043	-0.975555	-0.401179	0.182037	0.250671
9.12	4.01089	4.66126	0.982651	3.75358	-0.430222	0.806551	-1.00499	-0.0560717	-0.706024	-0.401176	0.267426	0.250692
10.12	4.49136	5.05887	1.28328	3.90423	-0.267258	0.861616	-0.879059	-0.0477425	-0.565399	-0.401173	0.310776	0.250713
11.12	4.97238	5.45502	1.58163	4.05465	-0.136475	0.916639	-0.805389	-0.0394167	-0.494858	-0.401171	0.342422	0.250735
12.12	5.51855	5.84973	1.80281	4.20484	-0.00514221	0.971619	-0.735229	-0.0310943	-0.446655	-0.401168	0.374069	0.250756
13.12	5.94528	6.24299	2.00688	4.35482	0.106094	1.02656	-0.674759	-0.0227752	-0.40477	-0.401165	0.405701	0.250777
14.12	6.41441	6.6348	2.2061	4.50457	0.222351	1.08145	-0.63327	-0.0144596	-0.356567	-0.401163	0.420395	0.250798
15.12	6.87778	7.02519	2.40031	4.65409	0.288208	1.13631	-0.597183	-0.00614735	-0.32196	-0.40116	0.439377	0.25082
16.12	7.39919	7.41414	2.5936	4.8034	0.379929	1.19112	-0.555298	0.0021615	-0.27861	-0.401158	0.449066	0.250841
17.12	7.88989	7.80167	2.77313	4.95248	0.46048	1.24589	-0.507492	0.010467	-0.235092	-0.401155	0.456879	0.250862
18.12	8.36794	8.18778	2.97273	5.10134	0.523361	1.30061	-0.471786	0.018769	-0.220016	-0.401152	0.464142	0.250884
19.12	8.8434	8.57248	3.20602	5.24997	0.62532	1.3553	-0.425064	0.0270677	-0.208298	-0.40115	0.464142	0.250905
20.12	9.28981	8.95576	3.43367	5.39839	0.71962	1.40994	-0.371323	0.035363	-0.20845	-0.401147	0.471954	0.250926
21.12	9.76582	9.33765	3.63977	5.54658	0.793289	1.46454	-0.323502	0.0436549	-0.215714	-0.401144	0.471954	0.250948
22.12	10.1765	9.71813	3.84383	5.69456	0.87532	1.5191	-0.272186	0.0519435	-0.215866	-0.401142	0.471954	0.250969
23.12	10.6325	10.0972	4.04305	5.84231	0.965164	1.57362	-0.225845	0.0602286	-0.192047	-0.401139	0.479218	0.25099
24.12	11.0861	10.4749	4.22273	5.98984	1.02336	1.62809	-0.18718	0.0685104	-0.174927	-0.401136	0.475861	0.251011
25.12	11.5236	10.8512	4.40485	6.13715	1.07899	1.68253	-0.179764	0.0767888	-0.156891	-0.401134	0.487976	0.251033
26.12	11.9967	11.2262	4.58601	6.28425	1.15227	1.73692	-0.175461	0.0850638	-0.156891	-0.401131	0.487976	0.251054
27.12	12.4528	11.5997	4.75398	6.43112	1.2075	1.79127	-0.174911	0.0933354	-0.149612	-0.401128	0.490936	0.251075
28.12	12.8404	11.9719	4.93367	6.57778	1.26164	1.84558	-0.179367	0.101604	-0.14032	-0.401126	0.492416	0.251096
29.12	13.2195	12.3427	5.1236	6.72421	1.33195	1.89984	-0.167648	0.109869	-0.145172	-0.401123	0.502655	0.251118
30.12	13.6643	12.7122	5.3243	6.87043	1.40657	1.95407	-0.143814	0.11813	-0.145172	-0.40112	0.50766	0.251139
31.12	14.1252	13.0803	5.52296	7.01643	1.47688	2.00825	-0.104752	0.126388	-0.152985	-0.401118	0.510086	0.25116
32.12	14.55	13.4471	5.70024	7.16221	1.56673	2.06239	-0.0729675	0.134643	-0.14032	-0.401115	0.507111	0.251182
33.12	14.9695	13.8125	5.89015	7.30778	1.64931	2.11649	-0.0504608	0.142894	-0.133453	-0.401113	0.50766	0.251203
34.12	15.3709	14.1766	6.06984	7.45312	1.72688	2.17055	-0.0314789	0.151142	-0.140717	-0.40111	0.514923	0.251224
35.12	15.7926	14.5393	6.2661	7.59825	1.78548	2.22456	-0.00265503	0.159387	-0.137894	-0.401107	0.510086	0.251245
36.12	16.2195	14.9007	6.45305	7.74317	1.85579	2.27854	0.00720215	0.167628	-0.120789	-0.401105	0.507111	0.251267
37.12	16.6252	15.2608	6.64781	7.88787	1.95047	2.33247	0.00422668	0.175866	-0.101807	-0.401102	0.500229	0.251288
38.12	17.0041	15.6196	6.83195	8.03235	2.02321	2.38636	0.0168762	0.184101	-0.113922	-0.401099	0.503204	0.251309
39.12	17.4215	15.977	7.00867	8.17662	2.09109	2.44021	0.0315704	0.192332	-0.121338	-0.401097	0.495392	0.25133
40.12	17.7902	16.3331	7.17906	8.32067	2.13759	2.49402	0.0511017	0.20056	-0.114075	-0.401094	0.495392	0.251352
41.12	18.1911	16.688	7.36023	8.4645	2.18689	2.54779	0.0481262	0.208785	-0.121338	-0.401091	0.490555	0.251373
42.12	18.591	17.0415	7.51164	8.60813	2.23915	2.60152	0.0583649	0.217006	-0.140869	-0.401089	0.475464	0.251394
43.12	18.9967	17.3937	7.67906	8.75153	2.26892	2.6552	0.0559387	0.225224	-0.136032	-0.401086	0.468597	0.251415
44.12	19.4171	17.7446	7.88016	8.89473	2.32899	2.70884	0.0710297	0.233438	-0.125397	-0.401084	0.47641	0.251437
45.12	19.7971	18.0943	8.06282	9.03771	2.37572	2.76245	0.085556	0.241649	-0.0941467	-0.401081	0.471558	0.251458
46.12	20.1536	18.4426	8.25423	9.18048	2.44603	2.81601	0.123138	0.249857	-0.0701599	-0.401078	0.471024	0.251479
47.12	20.5311	18.7897	8.44118	9.32303	2.50407	2.86953	0.172043	0.258061	-0.0657196	-0.401076	0.487579	0.2515
48.12	20.9021	19.1355	8.60539	9.46537	2.53978	2.923	0.16922	0.266262	-0.0623474	-0.401073	0.495392	0.251521
49.12	21.2299	19.4801	8.75383	9.6075	2.57884	2.97644	0.172592	0.27446	-0.067749	-0.40107	0.507111	0.251543
50.12	21.5936	19.8233	8.93094	9.74942	2.62234	3.02984	0.187271	0.282654	-0.0779724	-0.401068	0.507111	0.251564
51.12	21.9187	20.1653	9.10617	9.89113	2.6765	3.08319	0.177032	0.290845	-0.0971222	-0.401065	0.526642	0.251585
52.12	22.2415	20.5061	9.28828	10.0326	2.73509	3.13651	0.172592	0.299033	-0.0850067	-0.401062	0.50766	0.251606
53.12	22.6564	20.8456	9.45773	10.1739	2.80969	3.18978	0.191574	0.307217	-0.0820465	-0.40106	0.495392	0.251627
54.12	23.0281	21.1838	9.63016	10.315	2.87126	3.24301	0.215561	0.315398	-0.0771942	-0.401057	0.490936	0.251649
55.12	23.3631	21.5209	9.79274	10.4558	2.93376	3.2962	0.242355	0.323576	-0.0820465	-0.401055	0.495392	0.25167
56.12	23.7537	21.8566	9.96555	10.5965	3.00595	3.34935	0.266876	0.33175	-0.0896912	-0.401052	0.487579	0.251691
57.12	24.0936	22.1912	10.1521	10.7369	3.0822	3.40246	0.288834	0.339921	-0.113129	-0.401049	0.475861	0.251712
58.12	24.4308	22.5245	10.3216	10.8772	3.12532	3.45553	0.286026	0.348089	-0.125946	-0.401047	0.475861	0.251734
59.12	24.8	22.8565	10.492	11.0172	3.18134	3.50856	0.28157	0.356253	-0.143448	-0.401044	0.475861	0.251755
60.12	25.173	23.1874	10.637	11.157	3.25462	3.56155	0.274307	0.364414	-0.152359	-0.401041	0.483276	0.251776
61.12	25.5309	23.517	10.7976	11.2966	3.31282	3.61449	0.281418	0.372572	-0.148056	-0.401039	0.456482	0.251797
62.12	25.8679	23.8455	10.9533	11.436	3.36345	3.6674	0.273758	0.380726	-0.140793	-0.401036	0.456879	0.251818
63.12	26.2229	24.1727	11.13	11.5752	3.4265	3.72026	0.293686	0.388877	-0.123688	-0.401034	0.452026	0.251839
64.12	26.5428	24.4987	11.317	11.7142	3.49196	3.77309	0.301102	0.397025	-0.120712	-0.401031	0.428055	0.251861
65.12	26.8709	24.8235	11.5011	11.8529	3.5325	3.82587	0.309845	0.40517	-0.120712	-0.401028	0.441635	0.251882
66.12	27.2152	25.1472	11.6765	11.9915	3.57156	3.87861	0.327515	0.413311	-0.111969	-0.401026	0.439774	0.251903
67.12	27.5506	25.4696	11.8391	12.1299	3.62086	3.93132	0.363602	0.421448	-0.10173	-0.401023	0.441635	0.251924
68.12	27.8904	25.7909	12.0013	12.268	3.68822	3.98398	0.37587	0.429583	-0.108994	-0.40102	0.440155	0.251945
69.12	28.2146	26.1109	12.1404	12.406	3.739	4.0366	0.383682	0.437714	-0.116409	-0.401018	0.456329	0.251967
70.12	28.4842	26.4298	12.2976	12.5437	3.81267	4.08918	0.397827	0.445841	-0.0972748	-0.401015	0.449066	0.251988
71.12	28.7854	26.7475	12.4533	12.6812	3.89227	4.14172	0.394852	0.453966	-0.0725098	-0.401013	0.451492	0.252009
72.12	29.0984	27.0641	12.6101	12.8186	3.97282	4.19422	0.392426	0.462087	-0.0382843	-0.40101	0.449066	0.25203
73.12	29.429	27.3795	12.7706	12.9557	4.02806	4.24668	0.398758	0.470205	-0.0314178	-0.401007	0.439774	0.252051
74.12	29.7854	27.6937	12.9066	13.0926	4.09837	4.2991	0.398209	0.478319	-0.0269623	-0.401005	0.448517	0.252072
75.12	30.0984	28.0067	13.031	13.2293	4.14969	4.35148	0.41922	0.486431	-0.0464935	-0.401002	0.441254	0.252094
76.12	30.4143	28.3186	13.1687	13.3658	4.17908	4.40382	0.44899	0.494538	-0.073288	-0.400999	0.444611	0.252115
77.12	30.742	28.6294	13.3171	13.5021	4.20735	4.45611	0.461258	0.502643	-0.0972748	-0.400997	0.449066	0.252136
78.12	31.05	28.939	13.4728	13.6382	4.27078	4.50837	0.465164	0.510744	-0.135788	-0.400994	0.439774	0.252157
79.12	31.3289	29.2475	13.649	13.7741	4.31227	4.56059	0.477432	0.518842	-0.13298	-0.400992	0.444611	0.252178
80.12	31.6447	29.5549	13.822	13.9098	4.34837	4.61277	0.473526	0.526937	-0.108994	-0.400989	0.449066	0.252199
81.12	31.965	29.8611	13.9875	14.0453	4.40697	4.6649	0.475952	0.535028	-0.10939	-0.400986	0.447586	0.25222
82.12	32.2854	30.1661	14.1536	14.1806	4.47728	4.717	0.465714	0.543116	-0.116257	-0.400984	0.460785	0.252242
83.12	32.5984	30.4701	14.2927	14.3157	4.53978	4.76906	0.492508	0.551201	-0.121109	-0.400981	0.464142	0.252263
84.12	32.8977	30.7729	14.4505	14.4506	4.59109	4.82108	0.499924	0.559283	-0.124069	-0.400978	0.471024	0.252284
85.12	33.1687	31.0747	14.6013	14.5853	4.64485	4.87305	0.516495	0.567361	-0.13298	-0.400976	0.468048	0.252305
86.12	33.4334	31.3753	14.7706	14.7198	4.72243	4.92499	0.526733	0.575436	-0.150482	-0.400973	0.460785	0.252326
87.12	33.7176	31.6748	14.9334	14.8541	4.79031	4.97689	0.567276	0.583507	-0.152512	-0.400971	0.444611	0.252347
88.12	34.032	31.9732	15.0984	14.9882	4.87048	5.02875	0.575089	0.591575	-0.159775	-0.400968	0.444611	0.252368
89.12	34.3166	32.2705	15.2659	15.122	4.93111	5.08056	0.597046	0.59964	-0.17485	-0.400965	0.436798	0.25239
90.12	34.5861	32.5667	15.4066	15.2557	4.97986	5.13234	0.605789	0.607702	-0.172043	-0.400963	0.431961	0.252411
91.12	34.8679	32.8618	15.5502	15.3892	5.03993	5.18408	0.598526	0.61576	-0.174469	-0.40096	0.414459	0.252432
92.12	35.1955	33.1558	15.6956	15.5225	5.1136	5.23578	0.618439	0.623816	-0.184143	-0.400958	0.408524	0.252453
93.12	35.4729	33.4488	15.8411	15.6556	5.18094	5.28743	0.62439	0.631867	-0.189545	-0.400955	0.398285	0.252474
94.12	35.7229	33.7407	16.0158	15.7885	5.24681	5.33905	0.645401	0.639916	-0.222672	-0.400952	0.413361	0.252495
95.12	35.9875	34.0314	16.1955	15.9211	5.31227	5.39063	0.664932	0.647961	-0.242203	-0.40095	0.420242	0.252516
96.12	36.2781	34.3212	16.3796	16.0536	5.35634	5.44217	0.679611	0.656003	-0.249619	-0.400947	0.425079	0.252537
97.12	36.57	34.6098	16.5398	16.1859	5.39485	5.49367	0.672348	0.664042	-0.257431	-0.400944	0.444611	0.252558
98.12	36.8752	34.8974	16.6644	16.318	5.44563	5.54513	0.663055	0.672077	-0.245316	-0.400942	0.456329	0.25258
99.12	37.176	35.1839	16.7976	16.4499	5.49681	5.59655	0.65712	0.680109	-0.225784	-0.400939	0.456329	0.252601
100.12	37.45	35.4694	16.9216	16.5816	5.55501	5.64793	0.66008	0.688138	-0.210556	-0.400937	0.456329	0.252622
101.12	37.7102	35.7538	17.0593	16.7131	5.62086	5.69927	0.664932	0.696164	-0.20665	-0.400934	0.441635	0.252643
102.12	38.0158	36.0372	17.215	16.8444	5.66884	5.75057	0.66008	0.704186	-0.182281	-0.400931	0.437195	0.252664
103.12	38.2928	36.3195	17.3679	16.9755	5.7079	5.80183	0.671799	0.712205	-0.184143	-0.400929	0.447418	0.252685
104.12	38.5472	36.6008	17.5208	17.1064	5.74211	5.85305	0.679611	0.720221	-0.193832	-0.400926	0.472733	0.252706
105.12	38.8123	36.881	17.6716	17.2372	5.79774	5.90424	0.676254	0.728233	-0.215393	-0.400924	0.472885	0.252727
106.12	39.1101	37.1602	17.8245	17.3677	5.84705	5.95538	0.664536	0.736243	-0.233063	-0.400921	0.464142	0.252748
107.12	39.3586	37.4384	17.9462	17.498	5.89485	6.00648	0.667892	0.744249	-0.234543	-0.400918	0.475861	0.252769
108.12	39.5593	37.7155	18.0775	17.6281	5.97	6.05755	0.672348	0.752251	-0.225784	-0.400916	0.483673	0.25279
109.12	39.8049	37.9916	18.2152	17.7581	6.03102	6.10857	0.680008	0.760251	-0.217972	-0.400913	0.478836	0.252812
110.12	40.1057	38.2668	18.3753	17.8878	6.09853	6.15956	0.703995	0.768247	-0.20665	-0.400911	0.475861	0.252833
111.12	40.3942	38.5408	18.5042	18.0174	6.14931	6.21051	0.725952	0.77624	-0.20665	-0.400908	0.499695	0.252854
112.12	40.6804	38.8139	18.6521	18.1467	6.19861	6.26141	0.746964	0.784229	-0.2061	-0.400905	0.500229	0.252875
113.12	40.9021	39.086	18.8093	18.2759	6.24696	6.31228	0.749924	0.792216	-0.218369	-0.400903	0.509918	0.252896
114.12	41.1179	39.3571	18.9501	18.4049	6.30017	6.36311	0.774307	0.800199	-0.217819	-0.4009	0.519226	0.252917
115.12	41.3586	39.6271	19.0775	18.5336	6.36063	6.4139	0.796265	0.808179	-0.215393	-0.400898	0.514923	0.252938
116.12	41.6131	39.8962	19.2196	18.6622	6.40712	6.46465	0.81282	0.816155	-0.194382	-0.400895	0.514923	0.252959
117.12	41.8992	40.1643	19.3392	18.7906	6.45345	6.51537	0.836807	0.824129	-0.160324	-0.400892	0.480316	0.25298
118.12	42.1643	40.4314	19.4891	18.9188	6.50423	6.56604	0.864151	0.832099	-0.143051	-0.40089	0.475861	0.253001
119.12	42.3899	40.6975	19.6205	19.0468	6.54289	6.61667	0.87883	0.840066	-0.145477	-0.400887	0.459305	0.253022
120.12	42.6179	40.9626	19.7587	19.1746	6.56242	6.66727	0.883286	0.848029	-0.167435	-0.400885	0.429535	0.253043
121.12	42.8869	41.2267	19.9023	19.3023	6.61024	6.71782	0.878998	0.855989	-0.17485	-0.400882	0.412811	0.253064
122.12	43.176	41.4899	20.0473	19.4297	6.66438	6.76834	0.886261	0.863947	-0.164612	-0.400879	0.402573	0.253085
123.12	43.426	41.7521	20.1869	19.557	6.72258	6.81882	0.886261	0.8719	-0.162582	-0.400877	0.401093	0.253106
124.12	43.6643	42.0133	20.3241	19.684	6.78548	6.86926	0.878448	0.879851	-0.13298	-0.400874	0.398132	0.253127
125.12	43.8947	42.2736	20.4696	19.8109	6.84853	6.91966	0.887741	0.887798	-0.10939	-0.400872	0.397736	0.253149
126.12	44.1321	42.5329	20.6058	19.9375	6.9218	6.97002	0.886261	0.895742	-0.100082	-0.400869	0.398132	0.25317
127.12	44.3601	42.7912	20.7298	20.064	6.96532	7.02034	0.890167	0.903683	-0.0937653	-0.400866	0.39328	0.253191
128.12	44.5984	43.0486	20.8675	20.1903	7.0161	7.07063	0.895004	0.911621	-0.101578	-0.400864	0.398132	0.253212
129.12	44.8508	43.305	21.0042	20.3164	7.04587	7.12087	0.914536	0.919555	-0.108841	-0.400861	0.422104	0.253233
130.12	45.0861	43.5605	21.1177	20.4423	7.06688	7.17108	0.937042	0.927487	-0.108841	-0.400859	0.425079	0.253254
131.12	45.3166	43.8151	21.2298	20.5681	7.10594	7.22125	0.934067	0.935414	-0.118134	-0.400856	0.432343	0.253275
132.12	45.5275	44.0687	21.3632	20.6936	7.14001	7.27138	0.941879	0.943339	-0.135635	-0.400853	0.441635	0.253296
133.12	45.7584	44.3213	21.5009	20.819	7.20009	7.32147	0.949142	0.951261	-0.137665	-0.400851	0.439774	0.253317
134.12	45.9846	44.573	21.6405	20.9441	7.25125	7.37152	0.973129	0.959179	-0.147903	-0.400848	0.436798	0.253338
135.12	46.2463	44.8238	21.7933	21.0691	7.3197	7.42153	0.968674	0.967094	-0.160172	-0.400846	0.425079	0.253359
136.12	46.4846	45.0737	21.9603	21.1939	7.38274	7.47151	0.980392	0.975006	-0.151031	-0.400843	0.405548	0.25338
137.12	46.7272	45.3227	22.0981	21.3185	7.44283	7.52145	0.999924	0.982914	-0.120712	-0.40084	0.417664	0.253401
138.12	46.9211	45.5707	22.203	21.4429	7.49992	7.57135	1.0161	0.990819	-0.116257	-0.400838	0.422104	0.253422
139.12	47.1057	45.8178	22.3241	21.5672	7.54289	7.62121	1.02391	0.998721	-0.121109	-0.400835	0.427887	0.253443
140.12	47.3283	46.064	22.438	21.6912	7.60579	7.67103	1.0386	1.00662	-0.113297	-0.400833	0.433823	0.253464
141.12	47.5398	46.3093	22.5624	21.8151	7.6761	7.72081	1.0479	1.01452	-0.113678	-0.40083	0.456726	0.253485
142.12	47.7586	46.5537	22.6908	21.9387	7.73915	7.77055	1.05328	1.02241	-0.123917	-0.400828	0.464142	0.253506
143.12	47.992	46.7971	22.848	22.0622	7.78117	7.82026	1.05531	1.0303	-0.144928	-0.400825	0.463593	0.253527
144.12	48.2342	47.0397	22.9964	22.1855	7.84367	7.86993	1.05383	1.03818	-0.152359	-0.400822	0.456329	0.253548
145.12	48.4529	47.2814	23.1449	22.3087	7.90672	7.91956	1.05087	1.04607	-0.159622	-0.40082	0.456329	0.253569
146.12	48.6564	47.5222	23.2851	22.4316	7.94579	7.96915	1.05087	1.05395	-0.17189	-0.400817	0.456329	0.25359
147.12	48.8635	47.7621	23.4067	22.5544	8.00383	8.0187	1.06297	1.06182	-0.167038	-0.400815	0.429916	0.253611
148.12	49.0672	48.0011	23.5161	22.6769	8.05461	8.06822	1.07767	1.0697	-0.176727	-0.400812	0.432343	0.253632
149.12	49.2805	48.2392	23.6474	22.7993	8.10539	8.1177	1.08681	1.07756	-0.182114	-0.400809	0.422104	0.253653
150.12	49.4699	48.4765	23.7661	22.9215	8.14204	8.16714	1.11658	1.08543	-0.179306	-0.400807	0.401093	0.253674
151.12	49.6793	48.7128	23.89	23.0435	8.17961	8.21654	1.13814	1.0933	-0.160172	-0.400804	0.398132	0.253695
152.12	49.8869	48.9483	24.0131	23.1654	8.23039	8.2659	1.15579	1.10116	-0.179153	-0.400802	0.393829	0.253716
153.12	50.1062	49.1829	24.1595	23.287	8.28603	8.31523	1.17235	1.10901	-0.171494	-0.400799	0.374298	0.253737
154.12	50.3317	49.4167	24.3046	23.4085	8.34705	8.36451	1.18704	1.11687	-0.176331	-0.400796	0.373749	0.253758
155.12	50.567	49.6496	24.4218	23.5298	8.4257	8.41376	1.19446	1.12472	-0.170395	-0.400794	0.378204	0.253779
156.12	50.7926	49.8816	24.5546	23.6509	8.48149	8.46297	1.18422	1.13256	-0.188446	-0.400791	0.371323	0.2538
157.12	51.0084	50.1127	24.688	23.7718	8.52391	8.51215	1.21141	1.14041	-0.198685	-0.400789	0.381561	0.253821
158.12	51.258	50.343	24.8048	23.8926	8.57767	8.56128	1.24564	1.14825	-0.206497	-0.400786	0.371323	0.253842
159.12	51.4846	50.5725	24.9097	24.0131	8.6329	8.61038	1.23798	1.15609	-0.223053	-0.400784	0.369843	0.253863
160.12	51.7346	50.8011	25.0235	24.1335	8.66711	8.65944	1.21844	1.16392	-0.218216	-0.400781	0.378601	0.253883
161.12	51.9377	51.0289	25.148	24.2537	8.7075	8.70846	1.21844	1.17175	-0.218216	-0.400778	0.381561	0.253904
162.12	52.1179	51.2558	25.2735	24.3737	8.74173	8.75744	1.20673	1.17958	-0.210953	-0.400776	0.383041	0.253925
163.12	52.3	51.4819	25.398	24.4936	8.79735	8.80639	1.19891	1.18741	-0.218216	-0.400773	0.374298	0.253946
164.12	52.4812	51.7071	25.5187	24.6133	8.83939	8.8553	1.20618	1.19523	-0.21524	-0.400771	0.381561	0.253967
165.12	52.679	51.9315	25.6446	24.7327	8.89931	8.90417	1.21547	1.20305	-0.223053	-0.400768	0.390854	0.253988
166.12	52.8797	52.1551	25.7618	24.852	8.96477	8.953	1.24564	1.21086	-0.24501	-0.400766	0.38118	0.254009
167.12	53.0867	52.3778	25.8853	24.9712	9.02821	9.0018	1.26907	1.21867	-0.24704	-0.400763	0.371323	0.25403
168.12	53.2932	52.5997	25.9845	25.0901	9.10095	9.05056	1.29306	1.22648	-0.24556	-0.40076	0.369843	0.254051
169.12	53.4875	52.8208	26.0937	25.2089	9.15672	9.09928	1.28134	1.23429	-0.257278	-0.400758	0.371323	0.254072
170.12	53.676	53.0411	26.2196	25.3275	9.20024	9.14796	1.28578	1.24209	-0.268997	-0.400755	0.362579	0.254093
171.12	53.8679	53.2606	26.3587	25.4459	9.23727	9.19661	1.28134	1.24989	-0.261734	-0.400753	0.369843	0.254114
172.12	54.0504	53.4792	26.5038	25.5642	9.27055	9.24522	1.30328	1.25769	-0.242584	-0.40075	0.398132	0.254135
173.12	54.2463	53.6971	26.6182	25.6822	9.31242	9.29379	1.32431	1.26548	-0.237747	-0.400748	0.420242	0.254156
174.12	54.4187	53.9141	26.73	25.8001	9.3783	9.34232	1.35165	1.27327	-0.249847	-0.400745	0.410004	0.254177
175.12	54.6129	54.1303	26.8662	25.9178	9.43071	9.39082	1.37602	1.28106	-0.242584	-0.400742	0.401093	0.254198
176.12	54.8361	54.3458	26.9649	26.0353	9.4536	9.43927	1.40579	1.28884	-0.249847	-0.40074	0.397736	0.254218
177.12	55.0398	54.5604	27.0747	26.1527	9.50681	9.4877	1.42978	1.29662	-0.268997	-0.400737	0.378204	0.254239
178.12	55.218	54.7742	27.2177	26.2699	9.54735	9.53608	1.42978	1.3044	-0.280716	-0.400735	0.371323	0.25426
179.12	55.3752	54.9873	27.3409	26.3869	9.59367	9.58443	1.43219	1.31217	-0.273987	-0.400732	0.366882	0.254281
180.12	55.5519	55.1995	27.4487	26.5037	9.62978	9.63274	1.42641	1.31994	-0.269547	-0.400729	0.373749	0.254302
181.12	55.7229	55.411	27.562	26.6204	9.67665	9.68101	1.41751	1.32771	-0.252975	-0.400727	0.366486	0.254323
182.12	55.9141	55.6217	27.6835	26.7368	9.73039	9.72924	1.4268	1.33548	-0.23735	-0.400724	0.359604	0.254344
183.12	56.1299	55.8316	27.8169	26.8531	9.78563	9.77744	1.44431	1.34324	-0.222672	-0.400722	0.36203	0.254365
184.12	56.3555	56.0407	27.9292	26.9693	9.8472	9.8256	1.46587	1.351	-0.218216	-0.400719	0.359604	0.254386
185.12	56.5621	56.2491	28.0552	27.0852	9.88977	9.87372	1.4761	1.35875	-0.207977	-0.400717	0.350311	0.254407
186.12	56.7707	56.4566	28.1909	27.201	9.93852	9.92181	1.49954	1.3665	-0.21376	-0.400714	0.35907	0.254428
187.12	56.965	56.6635	28.2813	27.3166	10.0191	9.96986	1.51181	1.37425	-0.21524	-0.400712	0.36203	0.254448
188.12	57.1564	56.8695	28.3784	27.4321	10.0743	10.0179	1.48798	1.382	-0.223053	-0.400709	0.378601	0.254469
189.12	57.3246	57.0748	28.4873	27.5473	10.1333	10.0658	1.48016	1.38974	-0.233292	-0.400706	0.386017	0.25449
190.12	57.4875	57.2793	28.5938	27.6624	10.1792	10.1138	1.48056	1.39748	-0.223053	-0.400704	0.390854	0.254511
191.12	57.6834	57.483	28.7032	27.7773	10.247	10.1617	1.48743	1.40522	-0.218597	-0.400701	0.393829	0.254532
192.12	57.8557	57.686	28.8364	27.8921	10.3275	10.2096	1.51181	1.41295	-0.223053	-0.400699	0.393829	0.254553
193.12	58.0593	57.8883	28.9556	28.0067	10.3876	10.2574	1.51625	1.42068	-0.233292	-0.400696	0.393829	0.254574
194.12	58.2536	58.0898	29.047	28.1211	10.4292	10.3052	1.53134	1.42841	-0.21579	-0.400694	0.393829	0.254595
195.12	58.4308	58.2905	29.1519	28.2353	10.4726	10.3529	1.53915	1.43613	-0.230316	-0.400691	0.381561	0.254616
196.12	58.6135	58.4905	29.2462	28.3494	10.5206	10.4006	1.55383	1.44385	-0.233292	-0.400688	0.373749	0.254636
197.12	58.7809	58.6898	29.3511	28.4632	10.5581	10.4483	1.53876	1.45157	-0.234772	-0.400686	0.378601	0.254657
198.12	58.965	58.8883	29.4694	28.577	10.5743	10.496	1.53134	1.45928	-0.227356	-0.400683	0.383041	0.254678
199.12	59.1252	59.0861	29.6084	28.6905	10.6206	10.5436	1.51923	1.46699	-0.218597	-0.400681	0.381561	0.254699
200.12	59.2854	59.2832	29.7417	28.8039	10.6519	10.5911	1.51962	1.4747	-0.225876	-0.400678	0.366486	0.25472
201.12	59.4699	59.4795	29.8915	28.9171	10.712	10.6387	1.53134	1.4824	-0.235168	-0.400676	0.378601	0.254741
202.12	59.6403	59.6751	30.0308	29.0301	10.7613	10.6862	1.52689	1.49011	-0.223053	-0.400673	0.374298	0.254762
203.12	59.8239	59.87	30.1645	29.143	10.8169	10.7336	1.5386	1.4978	-0.230316	-0.400671	0.379135	0.254782
204.12	60.0128	60.0641	30.2886	29.2557	10.8902	10.7811	1.56297	1.5055	-0.237747	-0.400668	0.381561	0.254803
205.12	60.2028	60.2575	30.3946	29.3682	10.9385	10.8284	1.5825	1.51319	-0.254303	-0.400665	0.398132	0.254824
206.12	60.3869	60.4503	30.4947	29.4806	10.9756	10.8758	1.5972	1.52088	-0.268997	-0.400663	0.412811	0.254845
207.12	60.5666	60.6422	30.6055	29.5928	11.0351	10.9231	1.60219	1.52857	-0.288528	-0.40066	0.410004	0.254866
208.12	60.7268	60.8335	30.7105	29.7048	11.0864	10.9704	1.60461	1.53625	-0.305084	-0.400658	0.412811	0.254887
209.12	60.8797	61.0241	30.8213	29.8167	11.1251	11.0176	1.62119	1.54393	-0.30806	-0.400655	0.405548	0.254908
210.12	61.035	61.214	30.9439	29.9283	11.1645	11.0648	1.64368	1.5516	-0.305084	-0.400653	0.405548	0.254928
211.12	61.2078	61.4031	31.0397	30.0399	11.2227	11.112	1.65297	1.55928	-0.281265	-0.40065	0.386017	0.254949
212.12	61.3752	61.5916	31.147	30.1512	11.257	11.1591	1.67493	1.56695	-0.252426	-0.400647	0.378204	0.25497
213.12	61.5383	61.7793	31.254	30.2624	11.2931	11.2062	1.67978	1.57461	-0.239227	-0.400645	0.36351	0.254991
214.12	61.7195	61.9664	31.3628	30.3734	11.3316	11.2533	1.68422	1.58228	-0.226028	-0.400642	0.342651	0.255012
215.12	61.8704	62.1528	31.4649	30.4843	11.3604	11.3003	1.69446	1.58994	-0.210953	-0.40064	0.315704	0.255033
216.12	62.0324	62.3384	31.5981	30.595	11.4052	11.3473	1.68665	1.5976	-0.218597	-0.400637	0.296173	0.255053
217.12	62.1911	62.5234	31.73	30.7055	11.4385	11.3943	1.71532	1.60525	-0.233292	-0.400635	0.29657	0.255074
218.12	62.3361	62.7077	31.8321	30.8158	11.4921	11.4412	1.74228	1.6129	-0.24704	-0.400632	0.315552	0.255095
219.12	62.4963	62.8913	31.9366	30.926	11.5473	11.488	1.76907	1.62055	-0.24501	-0.40063	0.32782	0.255116
220.12	62.6691	63.0743	32.0352	31.0361	11.6011	11.5349	1.79359	1.6282	-0.24649	-0.400627	0.328201	0.255137
221.12	62.8512	63.2565	32.1281	31.1459	11.6645	11.5817	1.80829	1.63584	-0.266418	-0.400625	0.347351	0.255158
222.12	63.0203	63.4381	32.2227	31.2556	11.7227	11.6285	1.79617	1.64348	-0.277191	-0.400622	0.343048	0.255178
223.12	63.1793	63.619	32.3195	31.3651	11.7618	11.6752	1.78876	1.65111	-0.284073	-0.400619	0.342499	0.255199
224.12	63.3557	63.7992	32.4259	31.4745	11.8077	11.7219	1.78876	1.65874	-0.278137	-0.400617	0.335236	0.25522
225.12	63.5041	63.9788	32.5503	31.5837	11.8556	11.7686	1.7843	1.66637	-0.281647	-0.400614	0.335236	0.255241
226.12	63.6643	64.1577	32.6686	31.6928	11.8976	11.8152	1.78578	1.674	-0.288528	-0.400612	0.334686	0.255262
227.12	63.8367	64.3359	32.7759	31.8016	11.9259	11.8618	1.79602	1.68162	-0.281265	-0.400609	0.32782	0.255282
228.12	64.0041	64.5135	32.8751	31.9103	11.9577	11.9083	1.81259	1.68924	-0.284073	-0.400607	0.344376	0.255303
229.12	64.1643	64.6904	32.9917	32.0189	12.0113	11.9548	1.83212	1.69686	-0.305084	-0.400604	0.354614	0.255324
230.12	64.3049	64.8666	33.1011	32.1273	12.062	12.0013	1.85165	1.70447	-0.315475	-0.400602	0.374146	0.255345
231.12	64.4528	65.0422	33.1954	32.2355	12.1104	12.0478	1.85907	1.71209	-0.300797	-0.400599	0.39032	0.255366
232.12	64.6057	65.2172	33.3046	32.3436	12.1865	12.0942	1.87845	1.71969	-0.293365	-0.400596	0.398132	0.255386
233.12	64.7779	65.3915	33.419	32.4515	12.2462	12.1406	1.90297	1.7273	-0.281097	-0.400594	0.402573	0.255407
234.12	64.9528	65.5651	33.5142	32.5592	12.2852	12.1869	1.89813	1.7349	-0.269379	-0.400591	0.401093	0.255428
235.12	65.1369	65.7381	33.6255	32.6668	12.3243	12.2332	1.9054	1.7425	-0.261566	-0.400589	0.405548	0.255449
236.12	65.3015	65.9105	33.7423	32.7742	12.3902	12.2795	1.91469	1.75009	-0.261963	-0.400586	0.393829	0.25547
237.12	65.4576	66.0822	33.8585	32.8814	12.4259	12.3257	1.92493	1.75769	-0.273682	-0.400584	0.381561	0.25549
238.12	65.6057	66.2533	33.9649	32.9885	12.4649	12.3719	1.91766	1.76527	-0.278137	-0.400581	0.371323	0.255511
239.12	65.7536	66.4237	34.0695	33.0955	12.5113	12.4181	1.91711	1.77286	-0.307907	-0.400579	0.374298	0.255532
240.12	65.8918	66.5935	34.171	33.2022	12.5713	12.4642	1.92641	1.78044	-0.331879	-0.400576	0.374298	0.255553
241.12	66.0354	66.7627	34.2614	33.3088	12.6284	12.5103	1.92938	1.78802	-0.344147	-0.400574	0.373749	0.255573
242.12	66.1838	66.9313	34.3483	33.4153	12.6638	12.5563	1.91766	1.7956	-0.344147	-0.400571	0.366486	0.255594
243.12	66.3439	67.0992	34.4484	33.5216	12.7032	12.6024	1.92493	1.80317	-0.347122	-0.400569	0.366486	0.255615
244.12	66.511	67.2665	34.5382	33.6277	12.7618	12.6483	1.93369	1.81074	-0.344147	-0.400566	0.354767	0.255636
245.12	66.6496	67.4332	34.6491	33.7337	12.7999	12.6943	1.9415	1.81831	-0.339691	-0.400563	0.351791	0.255656
246.12	66.7883	67.5992	34.7326	33.8395	12.8243	12.7402	1.94891	1.82588	-0.331879	-0.400561	0.347351	0.255677
247.12	66.926	67.7647	34.8366	33.9451	12.8755	12.7861	1.94931	1.83344	-0.343994	-0.400558	0.33078	0.255698
248.12	67.0549	67.9295	34.9216	34.0506	12.9097	12.8319	1.98782	1.841	-0.35141	-0.400556	0.322968	0.255719
249.12	67.1955	68.0937	35.0265	34.156	12.9263	12.8777	2.00453	1.84855	-0.35141	-0.400553	0.312729	0.255739
250.12	67.3484	68.2573	35.1398	34.2612	12.9774	12.9235	2.02649	1.8561	-0.367981	-0.400551	0.32782	0.25576
251.12	67.5158	68.4203	35.2536	34.3662	13.0459	12.9692	2.04359	1.86365	-0.366653	-0.400548	0.335083	0.255781
252.12	67.6643	68.5827	35.3634	34.471	13.0909	13.0149	2.08063	1.8712	-0.37149	-0.400546	0.346954	0.255802
253.12	67.8239	68.7445	35.4796	34.5757	13.1206	13.0606	2.10609	1.87874	-0.378754	-0.400543	0.346954	0.255822
254.12	67.965	68.9056	35.5743	34.6803	13.203	13.1062	2.11205	1.88628	-0.378754	-0.400541	0.359604	0.255843
255.12	68.0984	69.0662	35.6597	34.7847	13.2735	13.1518	2.11391	1.89382	-0.378754	-0.400538	0.362579	0.255864
256.12	68.2415	69.2262	35.754	34.8889	13.3048	13.1974	2.1286	1.90135	-0.383209	-0.400536	0.34993	0.255885
257.12	68.3986	69.3856	35.8438	34.993	13.3634	13.2429	2.11688	1.90888	-0.37822	-0.400533	0.339691	0.255905
258.12	68.5398	69.5444	35.9409	35.0969	13.4292	13.2884	2.11633	1.91641	-0.370941	-0.40053	0.322968	0.255926
259.12	68.6955	69.7026	36.043	35.2007	13.4845	13.3338	2.10609	1.92393	-0.363678	-0.400528	0.320007	0.255947
260.12	68.8557	69.8602	36.148	35.3043	13.5235	13.3793	2.10461	1.93145	-0.35141	-0.400525	0.303986	0.255968
261.12	69.0279	70.0173	36.2612	35.4077	13.5699	13.4246	2.10165	1.93897	-0.344147	-0.400523	0.303436	0.255988
262.12	69.1959	70.1737	36.3751	35.511	13.5987	13.47	2.10947	1.94649	-0.339691	-0.40052	0.313126	0.256009
263.12	69.3512	70.3296	36.4727	35.6142	13.6474	13.5153	2.11633	1.954	-0.35141	-0.400518	0.316101	0.25603
264.12	69.4816	70.4849	36.589	35.7172	13.6807	13.5606	2.14072	1.96151	-0.358841	-0.400515	0.335083	0.25605
265.12	69.6207	70.6396	36.6784	35.82	13.73	13.6058	2.15297	1.96901	-0.363678	-0.400513	0.347351	0.256071
266.12	69.7346	70.7937	36.7463	35.9227	13.7613	13.651	2.17978	1.97652	-0.375397	-0.40051	0.350311	0.256092
267.12	69.8439	70.9473	36.8317	36.0252	13.8096	13.6962	2.18274	1.98402	-0.385635	-0.400508	0.33226	0.256113
268.12	69.9725	71.1002	36.9288	36.1276	13.8589	13.7414	2.19931	1.99151	-0.375397	-0.400505	0.322968	0.256133
269.12	70.0857	71.2527	37.0235	36.2298	13.9024	13.7865	2.21399	1.99901	-0.363678	-0.400503	0.320541	0.256154
270.12	70.215	71.4045	37.1206	36.3319	13.9605	13.8315	2.21844	2.0065	-0.334854	-0.4005	0.322968	0.256175
271.12	70.3557	71.5558	37.2466	36.4338	14.004	13.8766	2.235	2.01398	-0.321655	-0.400498	0.32782	0.256195
272.12	70.4572	71.7065	37.3589	36.5355	14.0699	13.9216	2.23352	2.02147	-0.31572	-0.400495	0.335236	0.256216
273.12	70.5904	71.8567	37.4605	36.6371	14.1134	13.9665	2.24281	2.02895	-0.312897	-0.400493	0.322968	0.256237
274.12	70.7272	72.0063	37.5548	36.7386	14.1495	14.0115	2.26477	2.03643	-0.293365	-0.40049	0.339539	0.256258
275.12	70.8629	72.1553	37.6593	36.8399	14.206	14.0564	2.26923	2.0439	-0.277191	-0.400487	0.335236	0.256278
276.12	71.025	72.3038	37.7419	36.941	14.254	14.1012	2.28134	2.05138	-0.284073	-0.400485	0.327423	0.256299
277.12	71.1836	72.4518	37.8195	37.042	14.2973	14.1461	2.30087	2.05885	-0.285553	-0.400482	0.315704	0.25632
278.12	71.3365	72.5992	37.9186	37.1429	14.3394	14.1908	2.32001	2.06631	-0.273834	-0.40048	0.312729	0.25634
279.12	71.4768	72.746	38.007	37.2436	14.3946	14.2356	2.32298	2.07378	-0.28891	-0.400477	0.311249	0.256361
280.12	71.6012	72.8923	38.1085	37.3441	14.4454	14.2803	2.33173	2.08124	-0.288528	-0.400475	0.308441	0.256382
281.12	71.7584	73.0381	38.1954	37.4445	14.4845	14.325	2.33954	2.08869	-0.305481	-0.400472	0.291336	0.256402
282.12	71.9064	73.1833	38.3048	37.5448	14.5308	14.3697	2.33228	2.09615	-0.323135	-0.40047	0.281479	0.256423
283.12	72.0398	73.3279	38.4171	37.6448	14.5864	14.4143	2.32001	2.1036	-0.305084	-0.400467	0.279999	0.256444
284.12	72.1717	73.4721	38.5308	37.7448	14.6402	14.4589	2.30829	2.11105	-0.305481	-0.400465	0.288757	0.256464
285.12	72.3049	73.6156	38.6446	37.8446	14.6885	14.5034	2.31555	2.11849	-0.31572	-0.400462	0.284454	0.256485
286.12	72.4451	73.7587	38.7419	37.9442	14.73	14.5479	2.32001	2.12593	-0.331879	-0.40046	0.272186	0.256506
287.12	72.5593	73.9012	38.839	38.0437	14.7735	14.5924	2.30531	2.13337	-0.324615	-0.400457	0.257507	0.256526
288.12	72.6838	74.0432	38.9216	38.143	14.8077	14.6369	2.30829	2.14081	-0.331879	-0.400455	0.257507	0.256547
289.12	72.8049	74.1847	39.0187	38.2422	14.8366	14.6813	2.30829	2.14824	-0.332428	-0.400452	0.261948	0.256568
290.12	72.9098	74.3256	39.0862	38.3413	14.8829	14.7257	2.30829	2.15567	-0.339691	-0.40045	0.260468	0.256588
291.12	73.0519	74.466	39.1593	38.4402	14.9244	14.77	2.30383	2.1631	-0.33931	-0.400447	0.264771	0.256609
292.12	73.2106	74.6059	39.2462	38.5389	14.9767	14.8143	2.31259	2.17052	-0.312897	-0.400445	0.281479	0.25663
293.12	73.3629	74.7453	39.3273	38.6375	15.0206	14.8586	2.3204	2.17794	-0.308441	-0.400442	0.284454	0.25665
294.12	73.508	74.8842	39.4136	38.7359	15.0771	14.9029	2.32484	2.18536	-0.300629	-0.40044	0.283905	0.256671
295.12	73.6369	75.0225	39.5206	38.8342	15.1299	14.9471	2.34235	2.19277	-0.300629	-0.400437	0.276642	0.256692
296.12	73.7433	75.1603	39.6158	38.9324	15.1792	14.9912	2.35649	2.20018	-0.300629	-0.400435	0.26976	0.256712
297.12	73.8557	75.2976	39.7149	39.0304	15.2227	15.0354	2.37119	2.20759	-0.3172	-0.400432	0.272186	0.256733
298.12	73.9723	75.4344	39.8165	39.1283	15.2618	15.0795	2.38586	2.215	-0.32016	-0.40043	0.277039	0.256753
299.12	74.0983	75.5707	39.9216	39.226	15.3126	15.1236	2.39072	2.2224	-0.30806	-0.400427	0.277039	0.256774
300.12	74.2393	75.7065	40.007	39.3235	15.3517	15.1676	2.39072	2.2298	-0.312347	-0.400424	0.288757	0.256795
301.12	74.3873	75.8417	40.1013	39.4209	15.398	15.2116	2.4054	2.2372	-0.293365	-0.400422	0.283905	0.256815
302.12	74.5309	75.9765	40.1984	39.5182	15.4288	15.2556	2.40297	2.24459	-0.269379	-0.400419	0.277039	0.256836
303.12	74.673	76.1108	40.2927	39.6153	15.4649	15.2995	2.41321	2.25198	-0.273682	-0.400417	0.281479	0.256857
304.12	74.8079	76.2445	40.3873	39.7123	15.504	15.3434	2.4415	2.25937	-0.293213	-0.400414	0.253204	0.256877
305.12	74.9187	76.3778	40.507	39.8091	15.5548	15.3873	2.47275	2.26675	-0.300629	-0.400412	0.264771	0.256898
306.12	75.0383	76.5106	40.6013	39.9058	15.5817	15.4311	2.49969	2.27413	-0.325012	-0.400409	0.257507	0.256918
307.12	75.1486	76.6428	40.6941	40.0024	15.6134	15.4749	2.51477	2.28151	-0.347122	-0.400407	0.253204	0.256939
308.12	75.2628	76.7746	40.7852	40.0988	15.6714	15.5187	2.53578	2.28889	-0.35939	-0.400404	0.257507	0.25696
309.12	75.3752	76.9059	40.8781	40.195	15.7345	15.5624	2.54602	2.29626	-0.35939	-0.400402	0.264771	0.25698
310.12	75.504	77.0367	40.9649	40.2911	15.7735	15.6061	2.55048	2.30363	-0.347122	-0.400399	0.288757	0.257001
311.12	75.649	77.167	41.0548	40.3871	15.8243	15.6498	2.56259	2.31099	-0.334854	-0.400397	0.284454	0.257022
312.12	75.7975	77.2969	41.1519	40.4829	15.8706	15.6934	2.58212	2.31836	-0.329468	-0.400394	0.291718	0.257042
313.12	75.9332	77.4262	41.2345	40.5786	15.9214	15.737	2.5968	2.32572	-0.335251	-0.400392	0.296173	0.257063
314.12	76.0714	77.5551	41.3321	40.6741	15.9571	15.7806	2.60165	2.33307	-0.339691	-0.400389	0.28891	0.257083
315.12	76.1955	77.6834	41.4366	40.7695	16.001	15.8241	2.60907	2.34043	-0.339691	-0.400387	0.284454	0.257104
316.12	76.3127	77.8113	41.5187	40.8647	16.0386	15.8676	2.62563	2.34778	-0.348999	-0.400384	0.291718	0.257125
317.12	76.4211	77.9388	41.6013	40.9598	16.0743	15.9111	2.62415	2.35513	-0.359222	-0.400382	0.288361	0.257145
318.12	76.5471	78.0657	41.6906	41.0548	16.1017	15.9545	2.63344	2.36247	-0.354385	-0.400379	0.288757	0.257166
319.12	76.676	78.1922	41.7731	41.1496	16.1476	15.9979	2.64368	2.36982	-0.35141	-0.400377	0.289139	0.257186
320.12	76.8211	78.3182	41.8513	41.2443	16.1954	16.0413	2.64758	2.37715	-0.344147	-0.400374	0.296021	0.257207
321.12	76.9411	78.4438	41.9406	41.3388	16.2467	16.0846	2.64516	2.38449	-0.344543	-0.400372	0.276642	0.257227
322.12	77.0354	78.5688	42.0231	41.4332	16.296	16.1279	2.64813	2.39182	-0.339691	-0.400369	0.245392	0.257248
323.12	77.1418	78.6934	42.094	41.5274	16.3438	16.1712	2.6554	2.39915	-0.334854	-0.400367	0.230698	0.257269
324.12	77.2536	78.8176	42.1794	41.6215	16.3946	16.2144	2.67197	2.40648	-0.341187	-0.400364	0.228836	0.257289
325.12	77.3605	78.9412	42.2692	41.7155	16.4409	16.2576	2.68852	2.41381	-0.347504	-0.400362	0.225861	0.25731
326.12	77.4918	79.0645	42.3732	41.8093	16.48	16.3008	2.70172	2.42113	-0.359222	-0.400359	0.210785	0.25733
327.12	77.6252	79.1872	42.4645	41.903	16.5161	16.3439	2.71103	2.42845	-0.363678	-0.400357	0.206726	0.257351
328.12	77.7541	79.3095	42.5622	41.9965	16.5747	16.387	2.72275	2.43576	-0.373917	-0.400354	0.226257	0.257372
329.12	77.8869	79.4314	42.6515	42.0899	16.6324	16.43	2.71063	2.44307	-0.383209	-0.400352	0.248199	0.257392
330.12	78.0011	79.5527	42.7389	42.1832	16.6807	16.4731	2.69891	2.45038	-0.397751	-0.400349	0.250229	0.257413
331.12	78.1207	79.6737	42.8122	42.2763	16.7252	16.5161	2.69891	2.45769	-0.411499	-0.400347	0.252655	0.257433
332.12	78.2223	79.7942	42.8976	42.3693	16.7663	16.559	2.71103	2.46499	-0.412979	-0.400344	0.264923	0.257454
333.12	78.3483	79.9142	42.9802	42.4621	16.7765	16.602	2.71103	2.47229	-0.426575	-0.400342	0.25766	0.257474
334.12	78.4772	80.0338	43.0817	42.5548	16.8096	16.6449	2.71103	2.47959	-0.429535	-0.400339	0.233276	0.257495
335.12	78.6178	80.1529	43.1667	42.6474	16.8466	16.6877	2.7261	2.48688	-0.429535	-0.400337	0.218597	0.257515
336.12	78.7584	80.2716	43.2584	42.7398	16.8872	16.7306	2.74954	2.49418	-0.417435	-0.400334	0.209305	0.257536
337.12	78.8869	80.3899	43.3468	42.8321	16.9501	16.7734	2.76181	2.50146	-0.40274	-0.400332	0.191635	0.257557
338.12	78.9846	80.5077	43.4415	42.9242	16.9995	16.8161	2.76625	2.50875	-0.402191	-0.400329	0.190155	0.257577
339.12	79.0891	80.6251	43.5503	43.0162	17.0473	16.8589	2.76477	2.51603	-0.410004	-0.400327	0.206726	0.257598
340.12	79.1882	80.742	43.6519	43.1081	17.1011	16.9016	2.80087	2.52331	-0.414459	-0.400324	0.226257	0.257618
341.12	79.2775	80.8585	43.7423	43.1998	17.1524	16.9442	2.81313	2.53059	-0.402359	-0.400322	0.240936	0.257639
342.12	79.3679	80.9746	43.8273	43.2914	17.1911	16.9869	2.82336	2.53786	-0.393448	-0.400319	0.254532	0.257659
343.12	79.468	81.0902	43.921	43.3828	17.2296	17.0295	2.83994	2.54513	-0.375397	-0.400317	0.260468	0.25768
344.12	79.5666	81.2054	43.9967	43.4742	17.2774	17.072	2.87415	2.5524	-0.390472	-0.400314	0.233673	0.2577
345.12	79.6998	81.3202	44.0695	43.5653	17.3243	17.1146	2.8786	2.55967	-0.383209	-0.400312	0.201874	0.257721
346.12	79.8434	81.4345	44.1403	43.6564	17.363	17.1571	2.88344	2.56693	-0.370941	-0.400309	0.183823	0.257741
347.12	79.9812	81.5484	44.2179	43.7473	17.3946	17.1995	2.88586	2.57419	-0.383606	-0.400307	0.175079	0.257762
348.12	80.0817	81.6619	44.3092	43.838	17.4331	17.242	2.89516	2.58144	-0.405563	-0.400304	0.158524	0.257782
349.12	80.1925	81.775	44.3781	43.9287	17.4815	17.2844	2.9054	2.58869	-0.409622	-0.400302	0.155548	0.257803
350.12	80.2971	81.8877	44.4601	44.0191	17.5382	17.3267	2.90244	2.59594	-0.394928	-0.400299	0.147736	0.257823
351.12	80.3825	81.9999	44.5548	44.1095	17.5791	17.3691	2.90244	2.60319	-0.378372	-0.400297	0.159851	0.257844
352.12	80.4889	82.1117	44.6398	44.1997	17.6284	17.4114	2.89798	2.61044	-0.363678	-0.400294	0.172501	0.257864
353.12	80.6222	82.2231	44.7073	44.2898	17.6909	17.4537	2.91025	2.61768	-0.383057	-0.400292	0.163208	0.257885
354.12	80.7418	82.3341	44.7765	44.3797	17.7466	17.4959	2.91025	2.62491	-0.390472	-0.400289	0.174927	0.257905
355.12	80.8672	82.4446	44.863	44.4696	17.8003	17.5381	2.91025	2.63215	-0.402191	-0.400287	0.167664	0.257926
356.12	81.0127	82.5548	44.9411	44.5592	17.8481	17.5803	2.92978	2.63938	-0.407043	-0.400284	0.179916	0.257947
357.12	81.13	82.6645	45.0192	44.6488	17.9019	17.6224	2.94931	2.64661	-0.417282	-0.400282	0.175079	0.257967
358.12	81.235	82.7738	45.1158	44.7382	17.9337	17.6645	2.96399	2.65384	-0.426178	-0.400279	0.190155	0.257988
359.12	81.3322	82.8828	45.2315	44.8275	17.977	17.7066	2.98016	2.66106	-0.39064	-0.400277	0.206726	0.258008
360.12	81.4221	82.9913	45.3394	44.9166	18.0187	17.7487	2.98798	2.66828	-0.373917	-0.400275	0.237976	0.258029
361.12	81.5236	83.0994	45.4288	45.0056	18.0548	17.7907	2.99969	2.6755	-0.355865	-0.400272	0.252655	0.258049
362.12	81.633	83.2071	45.5109	45.0945	18.0743	17.8327	2.99969	2.68271	-0.35141	-0.40027	0.261948	0.258069
363.12	81.7346	83.3144	45.586	45.1832	18.0938	17.8746	2.99969	2.68992	-0.344147	-0.400267	0.260468	0.25809
364.12	81.8395	83.4213	45.6759	45.2718	18.1255	17.9165	3.01181	2.69713	-0.351959	-0.400265	0.261948	0.25811
365.12	81.9532	83.5278	45.7419	45.3603	18.1519	17.9584	3.01477	2.70434	-0.354935	-0.400262	0.260468	0.258131
366.12	82.0787	83.6339	45.8316	45.4486	18.1952	18.0003	3.01181	2.71154	-0.347122	-0.40026	0.245789	0.258151
367.12	82.1686	83.7396	45.9141	45.5368	18.2466	18.0421	3.03134	2.71874	-0.344147	-0.400257	0.245789	0.258172
368.12	82.2852	83.8449	45.9991	45.6249	18.3052	18.0839	3.0386	2.72594	-0.327591	-0.400255	0.245789	0.258192
369.12	82.3918	83.9499	46.089	45.7128	18.3517	18.1256	3.05087	2.73313	-0.312897	-0.400252	0.252655	0.258213
370.12	82.5084	84.0544	46.1686	45.8006	18.4097	18.1673	3.05087	2.74032	-0.308441	-0.40025	0.257507	0.258233
371.12	82.6129	84.1585	46.2419	45.8883	18.4532	18.209	3.07767	2.74751	-0.320557	-0.400247	0.252655	0.258254
372.12	82.7272	84.2623	46.3122	45.9758	18.4923	18.2507	3.09384	2.7547	-0.339691	-0.400245	0.250229	0.258274
373.12	82.8317	84.3656	46.3859	46.0632	18.5434	18.2923	3.09384	2.76188	-0.35141	-0.400242	0.260468	0.258295
374.12	82.923	84.4686	46.4606	46.1505	18.5845	18.3339	3.08266	2.76906	-0.359222	-0.40024	0.269226	0.258315
375.12	83.0162	84.5712	46.5265	46.2377	18.6416	18.3755	3.0972	2.77623	-0.38266	-0.400237	0.269226	0.258336
376.12	83.1256	84.6734	46.5934	46.3247	18.6866	18.417	3.12845	2.78341	-0.383209	-0.400235	0.269226	0.258356
377.12	83.235	84.7753	46.6641	46.4116	18.7389	18.4585	3.13344	2.79058	-0.363678	-0.400232	0.26532	0.258377
378.12	83.3633	84.8767	46.7642	46.4983	18.7644	18.5	3.12376	2.79774	-0.378754	-0.40023	0.253204	0.258397
379.12	83.4528	84.9778	46.836	46.5849	18.7975	18.5414	3.12563	2.80491	-0.385635	-0.400227	0.233673	0.258417
380.12	83.5592	85.0785	46.9331	46.6714	18.8438	18.5828	3.1286	2.81207	-0.39978	-0.400225	0.240936	0.258438
381.12	83.6686	85.1788	47.0395	46.7578	18.8781	18.6242	3.11205	2.81923	-0.410004	-0.400222	0.250229	0.258458
382.12	83.7731	85.2787	47.1446	46.844	18.9097	18.6655	3.10126	2.82639	-0.437347	-0.40022	0.252655	0.258479
383.12	83.8918	85.3783	47.2296	46.9301	18.953	18.7068	3.10165	2.83354	-0.448685	-0.400217	0.250229	0.258499
384.12	84.0041	85.4775	47.3077	47.0161	18.9966	18.7481	3.08994	2.84069	-0.453522	-0.400215	0.248199	0.25852
385.12	84.0939	85.5763	47.3942	47.1019	19.0429	18.7893	3.10165	2.84784	-0.456497	-0.400213	0.245392	0.25854
386.12	84.1959	85.6748	47.4724	47.1877	19.0791	18.8305	3.10892	2.85498	-0.453522	-0.40021	0.225861	0.258561
387.12	84.3047	85.7729	47.5544	47.2732	19.121	18.8717	3.12602	2.86212	-0.444229	-0.400208	0.211166	0.258581
388.12	84.4186	85.8706	47.6208	47.3587	19.1841	18.9128	3.13626	2.86926	-0.426727	-0.400205	0.214142	0.258601
389.12	84.5279	85.968	47.7179	47.444	19.23	18.954	3.1597	2.87639	-0.412979	-0.400203	0.214142	0.258622
390.12	84.6256	86.065	47.7927	47.5292	19.2657	18.995	3.18422	2.88353	-0.421722	-0.4002	0.206329	0.258642
391.12	84.7467	86.1616	47.8708	47.6143	19.2999	19.0361	3.20657	2.89066	-0.40274	-0.400198	0.206177	0.258663
392.12	84.8439	86.2579	47.9333	47.6992	19.3366	19.0771	3.23056	2.89778	-0.390472	-0.400195	0.213989	0.258683
393.12	84.9332	86.3538	47.9991	47.7841	19.3513	19.1181	3.22571	2.90491	-0.395325	-0.400193	0.218445	0.258704
394.12	85.0354	86.4493	48.086	47.8687	19.3663	19.1591	3.23016	2.91203	-0.417282	-0.40019	0.210632	0.258724
395.12	85.1252	86.5445	48.1641	47.9533	19.3995	19.2	3.24228	2.91915	-0.426178	-0.400188	0.211563	0.258744
396.12	85.2199	86.6394	48.2374	48.0377	19.4482	19.2409	3.24228	2.92626	-0.441254	-0.400185	0.233521	0.258765
397.12	85.32	86.7339	48.3126	48.122	19.5014	19.2817	3.22328	2.93337	-0.453522	-0.400183	0.257507	0.258785
398.12	85.426	86.828	48.4024	48.2062	19.5775	19.3226	3.22125	2.94048	-0.475479	-0.40018	0.253204	0.258806
399.12	85.4963	86.9218	48.4757	48.2903	19.6445	19.3634	3.24712	2.94759	-0.484772	-0.400178	0.272186	0.258826
400.12	85.5817	87.0152	48.5577	48.3742	19.7002	19.4041	3.26517	2.95469	-0.473053	-0.400175	0.264923	0.258846
401.12	85.673	87.1083	48.6368	48.458	19.7568	19.4449	3.28134	2.96179	-0.480316	-0.400173	0.25766	0.258867
402.12	85.7541	87.2011	48.7106	48.5417	19.8169	19.4856	3.30087	2.96889	-0.492584	-0.400171	0.233673	0.258887
403.12	85.8434	87.2934	48.7852	48.6252	19.8561	19.5262	3.3204	2.97598	-0.50766	-0.400168	0.225861	0.258908
404.12	85.9619	87.3855	48.8663	48.7086	19.8829	19.5669	3.3472	2.98308	-0.49556	-0.400166	0.214142	0.258928
405.12	86.0908	87.4772	48.9484	48.7919	19.9292	19.6075	3.37119	2.99016	-0.492203	-0.400163	0.209305	0.258948
406.12	86.2032	87.5686	49.0231	48.8751	19.9558	19.6481	3.38586	2.99725	-0.476028	-0.400161	0.203354	0.258969
407.12	86.3213	87.6596	49.0817	48.9581	19.9724	19.6886	3.39516	3.00433	-0.441803	-0.400158	0.201874	0.258989
408.12	86.4264	87.7502	49.1759	49.041	19.9841	19.7291	3.4054	3.01141	-0.429535	-0.400156	0.199066	0.25901
409.12	86.5309	87.8406	49.2448	49.1238	20.0157	19.7696	3.40985	3.01849	-0.429932	-0.400153	0.175079	0.25903
410.12	86.6418	87.9306	49.317	49.2065	20.0548	19.8101	3.41469	3.02557	-0.448532	-0.400151	0.162811	0.25905
411.12	86.7418	88.0203	49.4044	49.289	20.0866	19.8505	3.43759	3.03264	-0.457825	-0.400148	0.179764	0.259071
412.12	86.8439	88.1096	49.4841	49.3715	20.1357	19.8909	3.45172	3.03971	-0.480316	-0.400146	0.187195	0.259091
413.12	86.9308	88.1986	49.5471	49.4538	20.1885	19.9312	3.45375	3.04677	-0.5047	-0.400143	0.175079	0.259111
414.12	87.0114	88.2872	49.6042	49.5359	20.2378	19.9715	3.46103	3.05383	-0.519379	-0.400141	0.175476	0.259132
415.12	87.1061	88.3756	49.6643	49.618	20.2852	20.0118	3.46829	3.06089	-0.518997	-0.400139	0.182343	0.259152
416.12	87.1911	88.4636	49.7374	49.6999	20.3243	20.0521	3.47275	3.06795	-0.512115	-0.400136	0.191635	0.259173
417.12	87.2897	88.5513	49.8005	49.7817	20.3585	20.0923	3.46884	3.07501	-0.502823	-0.400134	0.182892	0.259193
418.12	87.3996	88.6386	49.9019	49.8634	20.3829	20.1325	3.48056	3.08206	-0.49704	-0.400131	0.197418	0.259213
419.12	87.4996	88.7256	49.9923	49.9449	20.4259	20.1727	3.50735	3.08911	-0.49501	-0.400129	0.191635	0.259234
420.12	87.5983	88.8123	50.0622	50.0264	20.4649	20.2129	3.5386	3.09615	-0.516418	-0.400126	0.206726	0.259254
421.12	87.6881	88.8987	50.1281	50.1077	20.4923	20.253	3.53578	3.10319	-0.531097	-0.400124	0.201874	0.259274
422.12	87.7809	88.9847	50.2106	50.1889	20.5308	20.293	3.54602	3.11023	-0.531647	-0.400121	0.198914	0.259295
423.12	87.8678	89.0705	50.3005	50.2699	20.5816	20.3331	3.56259	3.11727	-0.534073	-0.400119	0.198914	0.259315
424.12	87.9766	89.1559	50.3708	50.3509	20.6182	20.3731	3.57782	3.1243	-0.543365	-0.400116	0.213989	0.259335
425.12	88.0787	89.2409	50.4562	50.4317	20.6552	20.4131	3.57001	3.13134	-0.519547	-0.400114	0.237976	0.259356
426.12	88.1808	89.3257	50.543	50.5124	20.712	20.4531	3.58212	3.13836	-0.49556	-0.400111	0.237579	0.259376
427.12	88.2658	89.4102	50.6398	50.5929	20.7495	20.493	3.5968	3.14539	-0.473053	-0.400109	0.237579	0.259396
428.12	88.3629	89.4943	50.7101	50.6734	20.7808	20.5329	3.60165	3.15241	-0.468597	-0.400107	0.237579	0.259417
429.12	88.4503	89.5781	50.7731	50.7537	20.8286	20.5727	3.60165	3.15943	-0.460785	-0.400104	0.238129	0.259437
430.12	88.5426	89.6616	50.8366	50.8339	20.8559	20.6126	3.60165	3.16645	-0.453522	-0.400102	0.225861	0.259457
431.12	88.649	89.7448	50.9366	50.914	20.914	20.6524	3.60892	3.17346	-0.449066	-0.400099	0.214142	0.259478
432.12	88.7344	89.8277	50.9948	50.994	20.9527	20.6921	3.61337	3.18047	-0.475876	-0.400097	0.226257	0.259498
433.12	88.8481	89.9103	51.0549	51.0739	20.9962	20.7319	3.61337	3.18748	-0.504303	-0.400094	0.245239	0.259518
434.12	88.9619	89.9926	51.1042	51.1536	21.0352	20.7716	3.62157	3.19449	-0.499847	-0.400092	0.272186	0.259539
435.12	89.064	90.0745	51.1759	51.2332	21.0866	20.8113	3.62119	3.20149	-0.516418	-0.400089	0.273666	0.259559
436.12	89.1524	90.1562	51.2374	51.3127	21.1281	20.8509	3.62119	3.20849	-0.53891	-0.400087	0.272186	0.259579
437.12	89.254	90.2375	51.3165	51.3921	21.1638	20.8905	3.60947	3.21549	-0.550629	-0.400085	0.257111	0.2596
438.12	89.3648	90.3186	51.3829	51.4713	21.1958	20.9301	3.61243	3.22248	-0.546341	-0.400082	0.245392	0.25962
439.12	89.4606	90.3993	51.4722	51.5504	21.2495	20.9697	3.60165	3.22947	-0.518997	-0.40008	0.230316	0.25964
440.12	89.5592	90.4797	51.5548	51.6294	21.2931	21.0092	3.60947	3.23646	-0.508759	-0.400077	0.194611	0.259661
441.12	89.6568	90.5599	51.6398	51.7083	21.3511	21.0487	3.61633	3.24345	-0.487747	-0.400075	0.175079	0.259681
442.12	89.7536	90.6397	51.7179	51.7871	21.3946	21.0882	3.62064	3.25043	-0.456497	-0.400072	0.170624	0.259701
443.12	89.8365	90.7193	51.7975	51.8658	21.4307	21.1276	3.63329	3.25741	-0.449066	-0.40007	0.179382	0.259722
444.12	89.9381	90.7985	51.8663	51.9443	21.4679	21.167	3.64555	3.26439	-0.460785	-0.400067	0.186646	0.259742
445.12	90.0162	90.8774	51.9532	52.0227	21.4991	21.2064	3.67532	3.27136	-0.473053	-0.400065	0.184219	0.259762
446.12	90.1012	90.9561	52.0309	52.101	21.5206	21.2457	3.68704	3.27833	-0.487747	-0.400062	0.194458	0.259783
447.12	90.1881	91.0344	52.1085	52.1792	21.5503	21.285	3.71532	3.2853	-0.496887	-0.40006	0.198914	0.259803
448.12	90.2852	91.1125	52.1833	52.2573	21.5864	21.3243	3.73056	3.29226	-0.519379	-0.400058	0.182343	0.259823
449.12	90.3674	91.1903	52.2302	52.3352	21.6405	21.3636	3.73352	3.29923	-0.518997	-0.400055	0.183823	0.259843
450.12	90.4498	91.2678	52.3048	52.413	21.6909	21.4028	3.74228	3.30619	-0.53595	-0.400053	0.155548	0.259864
451.12	90.5397	91.345	52.3615	52.4907	21.7153	21.442	3.74281	3.31314	-0.534073	-0.40005	0.148132	0.259884
452.12	90.6373	91.4219	52.4259	52.5683	21.7466	21.4811	3.7525	3.3201	-0.528687	-0.400048	0.151093	0.259904
453.12	90.7199	91.4985	52.4962	52.6458	21.7856	21.5203	3.76665	3.32705	-0.534073	-0.400045	0.148132	0.259925
454.12	90.7882	91.5748	52.5821	52.7232	21.8199	21.5594	3.77689	3.334	-0.530716	-0.400043	0.160385	0.259945
455.12	90.86	91.6508	52.6744	52.8004	21.8316	21.5984	3.79306	3.34094	-0.516571	-0.40004	0.151093	0.259965
456.12	90.9381	91.7266	52.7731	52.8775	21.8749	21.6375	3.80814	3.34789	-0.52626	-0.400038	0.151093	0.259985
457.12	91.0084	91.8021	52.8555	52.9545	21.9112	21.6765	3.8204	3.35483	-0.523834	-0.400036	0.152573	0.260006
458.12	91.0934	91.8773	52.9288	53.0314	21.9488	21.7154	3.83696	3.36176	-0.507278	-0.400033	0.155548	0.260026
459.12	91.1734	91.9522	52.9889	53.1082	21.9917	21.7544	3.84235	3.3687	-0.484772	-0.400031	0.162811	0.260046
460.12	91.2779	92.0268	53.0577	53.1849	22.0518	21.7933	3.85165	3.37563	-0.468597	-0.400028	0.159851	0.260066
461.12	91.3756	92.1012	53.1134	53.2614	22.1206	21.8322	3.83656	3.38256	-0.460785	-0.400026	0.159851	0.260087
462.12	91.4723	92.1752	53.1788	53.3378	22.1837	21.8711	3.82822	3.38948	-0.457825	-0.400023	0.167664	0.260107
463.12	91.5621	92.249	53.2657	53.4142	22.2345	21.9099	3.83508	3.39641	-0.456345	-0.400021	0.175476	0.260127
464.12	91.6613	92.3226	53.339	53.4904	22.3003	21.9487	3.8468	3.40333	-0.460785	-0.400019	0.175476	0.260148
465.12	91.7493	92.3958	53.4333	53.5664	22.3433	21.9875	3.84438	3.41024	-0.470093	-0.400016	0.194458	0.260168
466.12	91.8332	92.4688	53.5187	53.6424	22.3799	22.0262	3.83994	3.41716	-0.487747	-0.400014	0.206726	0.260188
467.12	91.9137	92.5415	53.6173	53.7183	22.4292	22.0649	3.85165	3.42407	-0.487747	-0.400011	0.221405	0.260208
468.12	92.0132	92.6139	53.7032	53.794	22.4605	22.1036	3.85947	3.43098	-0.492584	-0.400009	0.218445	0.260229
469.12	92.1061	92.6861	53.7687	53.8696	22.4893	22.1422	3.86188	3.43788	-0.487747	-0.400006	0.218445	0.260249
470.12	92.1983	92.7579	53.836	53.9452	22.5308	22.1809	3.84438	3.44479	-0.468216	-0.400004	0.218979	0.260269
471.12	92.3092	92.8296	53.8898	54.0206	22.5669	22.2194	3.83994	3.45169	-0.468216	-0.400001	0.209686	0.260289
472.12	92.4186	92.9009	53.9454	54.0958	22.6017	22.258	3.8468	3.45859	-0.46524	-0.399999	0.206726	0.26031
473.12	92.5011	92.972	54.0187	54.171	22.6402	22.2965	3.86337	3.46548	-0.460403	-0.399997	0.218445	0.26033
474.12	92.5817	93.0428	54.0788	54.2461	22.6909	22.335	3.87119	3.47237	-0.46524	-0.399994	0.221405	0.26035
475.12	92.6686	93.1134	54.1446	54.321	22.7315	22.3735	3.89072	3.47926	-0.473053	-0.399992	0.230698	0.26037
476.12	92.7467	93.1836	54.2377	54.3959	22.7687	22.4119	3.90579	3.48615	-0.480316	-0.399989	0.240936	0.26039
477.12	92.8317	93.2537	54.3511	54.4706	22.7931	22.4504	3.94618	3.49303	-0.488129	-0.399987	0.244843	0.260411
478.12	92.9068	93.3234	54.4337	54.5452	22.8316	22.4887	3.96829	3.49991	-0.492035	-0.399984	0.237976	0.260431
479.12	92.9889	93.3929	54.4987	54.6197	22.8682	22.5271	3.96829	3.50679	-0.499847	-0.399982	0.222885	0.260451
480.12	93.0787	93.4622	54.5427	54.6941	22.917	22.5654	3.97275	3.51366	-0.484772	-0.39998	0.201874	0.260471
481.12	93.1686	93.5312	54.594	54.7683	22.9741	22.6037	3.97275	3.52054	-0.468216	-0.399977	0.198914	0.260492
482.12	93.2657	93.5999	54.6476	54.8425	23.0312	22.642	3.97275	3.52741	-0.473053	-0.399975	0.191635	0.260512
483.12	93.3678	93.6684	54.7101	54.9165	23.0747	22.6802	3.98001	3.53427	-0.468216	-0.399972	0.189606	0.260532
484.12	93.4576	93.7366	54.7852	54.9905	23.1284	22.7184	3.9854	3.54114	-0.448685	-0.39997	0.191635	0.260552
485.12	93.5426	93.8045	54.863	55.0643	23.1792	22.7566	3.98056	3.548	-0.460785	-0.399967	0.201874	0.260572
486.12	93.6222	93.8722	54.9411	55.138	23.2227	22.7947	3.98297	3.55486	-0.470093	-0.399965	0.199066	0.260593
487.12	93.7106	93.9397	54.9948	55.2116	23.2657	22.8328	3.97275	3.56171	-0.46376	-0.399963	0.175079	0.260613
488.12	93.7975	94.0069	55.0549	55.2851	23.3048	22.8709	3.98485	3.56856	-0.460785	-0.39996	0.155548	0.260633
489.12	93.8942	94.0738	55.1085	55.3585	23.3438	22.909	3.97328	3.57541	-0.465637	-0.399958	0.14328	0.260653
490.12	93.9811	94.1405	55.171	55.4317	23.3712	22.947	3.98782	3.58226	-0.460785	-0.399955	0.14032	0.260673
491.12	94.0636	94.2069	55.2266	55.5049	23.3853	22.985	4.00438	3.58911	-0.449066	-0.399953	0.133438	0.260694
492.12	94.1403	94.2731	55.3048	55.5779	23.4112	23.023	4.03899	3.59595	-0.449066	-0.39995	0.15094	0.260714
493.12	94.215	94.3391	55.3781	55.6509	23.4409	23.0609	4.05814	3.60279	-0.453522	-0.399948	0.171951	0.260734
494.12	94.2854	94.4048	55.4381	55.7237	23.4605	23.0988	4.07024	3.60962	-0.453522	-0.399946	0.187195	0.260754
495.12	94.3605	94.4703	55.5455	55.7964	23.477	23.1367	4.0825	3.61645	-0.443832	-0.399943	0.187195	0.260774
496.12	94.4606	94.5355	55.6247	55.869	23.5234	23.1745	4.09422	3.62328	-0.453522	-0.399941	0.182343	0.260795
497.12	94.5397	94.6004	55.7032	55.9415	23.5548	23.2124	4.0972	3.63011	-0.45314	-0.399938	0.172104	0.260815
498.12	94.6373	94.6652	55.7614	56.0139	23.5937	23.2502	4.10649	3.63694	-0.448685	-0.399936	0.155945	0.260835
499.12	94.7272	94.7296	55.8195	56.0862	23.6493	23.2879	4.11673	3.64376	-0.460785	-0.399933	0.163208	0.260855
500.12	94.8047	94.7939	55.8873	56.1583	23.7075	23.3256	4.12119	3.65058	-0.484772	-0.399931	0.163208	0.260875
501.12	94.8873	94.8579	55.9484	56.2304	23.7616	23.3634	4.13626	3.65739	-0.511566	-0.399929	0.171951	0.260895
502.12	94.9723	94.9216	56.0235	56.3023	23.812	23.401	4.14072	3.66421	-0.507278	-0.399926	0.186646	0.260916
503.12	95.0402	94.9852	56.0968	56.3742	23.8481	23.4387	4.1411	3.67102	-0.516022	-0.399924	0.187195	0.260936
504.12	95.1325	95.0484	56.1671	56.4459	23.8946	23.4763	4.14798	3.67783	-0.523834	-0.399921	0.191635	0.260956
505.12	95.2199	95.1115	56.2419	56.5176	23.9093	23.5139	4.16008	3.68463	-0.52681	-0.399919	0.175079	0.260976
506.12	95.3121	95.1743	56.3049	56.5891	23.9385	23.5514	4.19133	3.69143	-0.518997	-0.399917	0.162811	0.260996
507.12	95.4068	95.2369	56.3663	56.6605	23.9731	23.589	4.22798	3.69823	-0.523834	-0.399914	0.163208	0.261016
508.12	95.5036	95.2992	56.4411	56.7318	24.0191	23.6265	4.24564	3.70503	-0.52626	-0.399912	0.152573	0.261037
509.12	95.5714	95.3613	56.4997	56.803	24.0386	23.6639	4.23782	3.71183	-0.523834	-0.399909	0.148132	0.261057
510.12	95.6442	95.4232	56.5577	56.8741	24.0864	23.7014	4.24211	3.71862	-0.518997	-0.399907	0.143677	0.261077
511.12	95.7193	95.4848	56.6134	56.945	24.1445	23.7388	4.27095	3.7254	-0.49704	-0.399904	0.148514	0.261097
512.12	95.7975	95.5462	56.6861	57.0159	24.1686	23.7762	4.29587	3.73219	-0.49501	-0.399902	0.175476	0.261117
513.12	95.8873	95.6074	56.7583	57.0867	24.1861	23.8135	4.29344	3.73897	-0.49704	-0.3999	0.195007	0.261137
514.12	95.9723	95.6684	56.8316	57.1573	24.2192	23.8509	4.32469	3.74575	-0.487747	-0.399897	0.209137	0.261158
515.12	96.0519	95.7291	56.9067	57.2279	24.2588	23.8882	4.3204	3.75253	-0.49501	-0.399895	0.218445	0.261178
516.12	96.1207	95.7896	56.9966	57.2983	24.2955	23.9254	4.32822	3.75931	-0.509155	-0.399892	0.230164	0.261198
517.12	96.1925	95.8499	57.0773	57.3687	24.3213	23.9627	4.32782	3.76608	-0.50766	-0.39989	0.230164	0.261218
518.12	96.2662	95.9099	57.1403	57.4389	24.3783	23.9999	4.33548	3.77285	-0.519379	-0.399888	0.218445	0.261238
519.12	96.3633	95.9697	57.1862	57.509	24.4263	24.0371	4.3468	3.77961	-0.512115	-0.399885	0.225708	0.261258
520.12	96.4893	96.0293	57.2346	57.579	24.4848	24.0742	4.34868	3.78638	-0.514542	-0.399883	0.218445	0.261278
521.12	96.5938	96.0887	57.2809	57.649	24.5308	24.1113	4.35947	3.79314	-0.512115	-0.39988	0.226257	0.261299
522.12	96.6764	96.1479	57.339	57.7188	24.5669	24.1484	4.35501	3.7999	-0.531097	-0.399878	0.245789	0.261319
523.12	96.7614	96.2068	57.3976	57.7885	24.6059	24.1855	4.35892	3.80665	-0.550629	-0.399875	0.240936	0.261339
524.12	96.8283	96.2655	57.4727	57.8581	24.6333	24.2226	4.36375	3.8134	-0.562897	-0.399873	0.250229	0.261359
525.12	96.88	96.324	57.562	57.9276	24.6552	24.2596	4.38368	3.82015	-0.553604	-0.399871	0.245392	0.261379
526.12	96.9338	96.3823	57.6446	57.997	24.6884	24.2965	4.41789	3.8269	-0.540405	-0.399868	0.240936	0.261399
527.12	96.9967	96.4403	57.7179	58.0662	24.7347	24.3335	4.42235	3.83365	-0.550629	-0.399866	0.230698	0.261419
528.12	97.0821	96.4982	57.8003	58.1354	24.8046	24.3704	4.45642	3.84039	-0.534073	-0.399863	0.221405	0.261439
529.12	97.1686	96.5558	57.8751	58.2045	24.8682	24.4073	4.47313	3.84713	-0.523834	-0.399861	0.226257	0.261459
530.12	97.2588	96.6132	57.9575	58.2735	24.9127	24.4442	4.47313	3.85386	-0.511566	-0.399859	0.221405	0.26148
531.12	97.3633	96.6704	58.0308	58.3423	24.9571	24.481	4.46829	3.8606	-0.53595	-0.399856	0.210632	0.2615
532.12	97.4576	96.7273	58.1055	58.4111	25.004	24.5178	4.46532	3.86733	-0.518997	-0.399854	0.203354	0.26152
533.12	97.5279	96.7841	58.1599	58.4798	25.028	24.5546	4.46829	3.87405	-0.499847	-0.399851	0.202271	0.26154
534.12	97.6012	96.8407	58.2106	58.5483	25.0338	24.5914	4.46086	3.88078	-0.5047	-0.399849	0.201874	0.26156
535.12	97.6686	96.897	58.2638	58.6168	25.0596	24.6281	4.45805	3.8875	-0.50766	-0.399847	0.203751	0.26158
536.12	97.7467	96.9531	58.3239	58.6851	25.0938	24.6648	4.46829	3.89422	-0.514542	-0.399844	0.213593	0.2616
537.12	97.8243	97.009	58.3873	58.7534	25.1402	24.7015	4.48001	3.90094	-0.523834	-0.399842	0.218445	0.26162
538.12	97.899	97.0647	58.4634	58.8215	25.1763	24.7381	4.4854	3.90765	-0.543365	-0.399839	0.206726	0.26164
539.12	97.9766	97.1202	58.5401	58.8895	25.2226	24.7747	4.50735	3.91436	-0.546341	-0.399837	0.198914	0.26166
540.12	98.0713	97.1755	58.6089	58.9575	25.2929	24.8113	4.51181	3.92107	-0.55806	-0.399835	0.194458	0.261681
541.12	98.1617	97.2306	58.6909	59.0253	25.3364	24.8479	4.51907	3.92778	-0.567352	-0.399832	0.192032	0.261701
542.12	98.2296	97.2855	58.754	59.093	25.3755	24.8844	4.53563	3.93448	-0.565872	-0.39983	0.182739	0.261721
543.12	98.3136	97.3402	58.812	59.1607	25.4097	24.9209	4.5386	3.94118	-0.565323	-0.399827	0.182739	0.261741
544.12	98.383	97.3946	58.8706	59.2282	25.4527	24.9574	4.52837	3.94788	-0.571655	-0.399825	0.187195	0.261761
545.12	98.4606	97.4489	58.9216	59.2956	25.4698	24.9938	4.52727	3.95457	-0.573135	-0.399823	0.194458	0.261781
546.12	98.5354	97.5029	58.9727	59.3629	25.4951	25.0302	4.53172	3.96127	-0.574615	-0.39982	0.198914	0.261801
547.12	98.6222	97.5568	59.0309	59.4302	25.5356	25.0666	4.52243	3.96796	-0.562897	-0.399818	0.206726	0.261821
548.12	98.6911	97.6105	59.0773	59.4973	25.5699	25.103	4.52821	3.97464	-0.57016	-0.399815	0.199448	0.261841
549.12	98.7774	97.6639	59.1403	59.5643	25.5909	25.1393	4.53899	3.98133	-0.584854	-0.399813	0.202271	0.261861
550.12	98.8769	97.7172	59.2101	59.6312	25.6059	25.1756	4.57024	3.98801	-0.594147	-0.399811	0.213593	0.261881
551.12	98.9649	97.7702	59.2735	59.698	25.6357	25.2119	4.57524	3.99469	-0.58931	-0.399808	0.198517	0.261901
552.12	99.0596	97.8231	59.339	59.7647	25.6684	25.2481	4.57767	4.00136	-0.594147	-0.399806	0.191635	0.261921
553.12	99.1446	97.8757	59.4069	59.8314	25.7196	25.2843	4.59422	4.00804	-0.597122	-0.399803	0.182343	0.261941
554.12	99.2389	97.9282	59.4757	59.8979	25.7616	25.3205	4.58994	4.01471	-0.582047	-0.399801	0.187195	0.261962
555.12	99.317	97.9805	59.5382	59.9643	25.8241	25.3567	4.60446	4.02137	-0.55806	-0.399799	0.199448	0.261982
556.12	99.402	98.0325	59.6055	60.0306	25.8628	25.3928	4.61337	4.02804	-0.52829	-0.399796	0.209686	0.262002
557.12	99.4699	98.0844	59.6593	60.0968	25.8989	25.4289	4.63774	4.0347	-0.522354	-0.399794	0.213593	0.262022
558.12	99.5426	98.1361	59.7149	60.1629	25.938	25.465	4.64798	4.04136	-0.523834	-0.399791	0.211166	0.262042
559.12	99.6027	98.1876	59.7852	60.2289	25.9605	25.501	4.66751	4.04802	-0.511566	-0.399789	0.201874	0.262062
560.12	99.6715	98.2388	59.8273	60.2948	25.9966	25.5371	4.6915	4.05467	-0.511566	-0.399787	0.210632	0.262082
561.12	99.7418	98.2899	59.8946	60.3607	26.0624	25.5731	4.71048	4.06132	-0.543213	-0.399784	0.199448	0.262102
562.12	99.8214	98.3409	59.9532	60.4264	26.1059	25.609	4.72275	4.06797	-0.575012	-0.399782	0.202271	0.262122
563.12	99.8825	98.3916	60.0191	60.492	26.1645	25.645	4.73056	4.07462	-0.597504	-0.399779	0.198914	0.262142
564.12	99.965	98.4421	60.0773	60.5575	26.2032	25.6809	4.735	4.08126	-0.613678	-0.399777	0.213989	0.262162
565.12	100.04	98.4924	60.1373	60.6229	26.2423	25.7168	4.72571	4.0879	-0.612198	-0.399775	0.199448	0.262182
566.12	100.113	98.5426	60.1939	60.6882	26.257	25.7526	4.71103	4.09454	-0.625397	-0.399772	0.190155	0.262202
567.12	100.188	98.5926	60.2584	60.7535	26.2687	25.7884	4.71829	4.10117	-0.596725	-0.39977	0.187195	0.262222
568.12	100.258	98.6423	60.3224	60.8186	26.2897	25.8242	4.72313	4.10781	-0.582428	-0.399767	0.170624	0.262242
569.12	100.336	98.6919	60.3678	60.8836	26.3077	25.86	4.74992	4.11443	-0.582428	-0.399765	0.159851	0.262262
570.12	100.423	98.7413	60.4288	60.9485	26.3409	25.8958	4.77837	4.12106	-0.589691	-0.399763	0.148132	0.262282
571.12	100.504	98.7905	60.5034	61.0133	26.3931	25.9315	4.7847	4.12769	-0.597504	-0.39976	0.140854	0.262302
572.12	100.59	98.8396	60.5743	61.0781	26.4571	25.9672	4.81297	4.13431	-0.60141	-0.399758	0.138824	0.262322
573.12	100.668	98.8884	60.6251	61.1427	26.4967	26.0028	4.81595	4.14093	-0.606262	-0.399756	0.14032	0.262342
574.12	100.739	98.9371	60.7032	61.2072	26.5386	26.0385	4.81259	4.14754	-0.597504	-0.399753	0.148132	0.262362
575.12	100.805	98.9856	60.7765	61.2717	26.5743	26.0741	4.80814	4.15416	-0.59697	-0.399751	0.159851	0.262382
576.12	100.883	99.0339	60.8438	61.336	26.5938	26.1096	4.80087	4.16077	-0.582428	-0.399748	0.17453	0.262402
577.12	100.953	99.082	60.9099	61.4002	26.6134	26.1452	4.80087	4.16737	-0.557907	-0.399746	0.183823	0.262422
578.12	101.021	99.1299	60.9636	61.4644	26.6284	26.1807	4.78876	4.17398	-0.5672	-0.399744	0.198914	0.262442
579.12	101.082	99.1777	61.0235	61.5284	26.6519	26.2162	4.78134	4.18058	-0.550629	-0.399741	0.195007	0.262462
580.12	101.142	99.2253	61.0769	61.5924	26.6763	26.2517	4.7843	4.18718	-0.562744	-0.399739	0.195007	0.262482
581.12	101.196	99.2727	61.1402	61.6562	26.727	26.2871	4.78563	4.19378	-0.575012	-0.399736	0.197418	0.262502
582.12	101.261	99.3199	61.2071	61.72	26.7808	26.3225	4.79344	4.20037	-0.590088	-0.399734	0.203751	0.262522
583.12	101.317	99.367	61.2856	61.7836	26.8243	26.3579	4.80852	4.20697	-0.609222	-0.399732	0.213989	0.262542
584.12	101.38	99.4138	61.3585	61.8472	26.8438	26.3933	4.83195	4.21356	-0.628754	-0.399729	0.206177	0.262562
585.12	101.47	99.4605	61.4288	61.9107	26.8628	26.4286	4.83939	4.22014	-0.640472	-0.399727	0.218445	0.262582
586.12	101.55	99.5071	61.5084	61.9741	26.8868	26.4639	4.83696	4.22673	-0.65274	-0.399724	0.218445	0.262602
587.12	101.642	99.5534	61.57	62.0373	26.8829	26.4992	4.85461	4.23331	-0.655716	-0.399722	0.222885	0.262622
588.12	101.739	99.5996	61.6355	62.1005	26.895	26.5345	4.85609	4.23988	-0.664459	-0.39972	0.201874	0.262642
589.12	101.829	99.6456	61.6984	62.1636	26.9413	26.5697	4.87119	4.24646	-0.667816	-0.399717	0.186798	0.262662
590.12	101.907	99.6914	61.7731	62.2266	26.9848	26.6049	4.86969	4.25303	-0.667816	-0.399715	0.194061	0.262682
591.12	101.972	99.7371	61.8513	62.2895	27.0434	26.64	4.88774	4.2596	-0.679001	-0.399713	0.191635	0.262702
592.12	102.035	99.7826	61.9333	62.3523	27.1011	26.6752	4.91751	4.26617	-0.676178	-0.39971	0.175079	0.262722
593.12	102.098	99.8279	62.0304	62.415	27.1519	26.7103	4.92197	4.27274	-0.679535	-0.399708	0.175476	0.262742
594.12	102.161	99.873	62.1013	62.4776	27.2032	26.7454	4.92978	4.2793	-0.676575	-0.399705	0.182343	0.262762
595.12	102.223	99.918	62.1448	62.5401	27.2467	26.7804	4.92978	4.28586	-0.667435	-0.399703	0.187195	0.262782
596.12	102.293	99.9628	62.1671	62.6025	27.2687	26.8155	4.92978	4.29242	-0.671722	-0.399701	0.167664	0.262802
597.12	102.368	100.007	62.2028	62.6648	27.312	26.8505	4.90094	4.29897	-0.664459	-0.399698	0.14328	0.262822
598.12	102.419	100.052	62.2058	62.7271	27.3122	26.8855	4.82469	4.30552	-0.793365	-0.399696	0.10907	0.262842
599.12	102.366	100.096	59.3502	62.7892	27.0615	26.9204	-22.7141	4.31207	-0.70697	-0.399694	0.118912	0.262862
600.12	68.8777	99.1725	-19.2923	60.4895	-48.0885	26.6522	-88.617	4.4505	-34.802	0.00150878	-44.5632	0.0123812
601.12	84.1914	99.1688	32.6837	60.4873	-15.5078	26.6512	2.22025	4.45033	-46.8517	0.00150872	-27.0423	0.0123808
602.12	104.164	99.1651	66.748	60.4851	32.849	26.6503	10.133	4.45017	4.33444	0.00150867	3.32469	0.0123803
603.12	103.504	99.1614	64.929	60.4828	30.6105	26.6493	8.15837	4.45	2.62859	0.00150861	2.13899	0.0123798
604.12	103.081	99.1577	63.8995	60.4806	29.4834	26.6483	7.2511	4.44983	1.39694	0.00150855	1.36844	0.0123794
605.12	102.736	99.154	63.3055	60.4783	28.8507	26.6473	6.72009	4.44967	0.74202	0.0015085	1.01718	0.0123789
606.12	102.473	99.1503	62.953	60.4761	28.4533	26.6463	6.3954	4.4495	0.422653	0.00150844	0.866333	0.0123785
607.12	102.344	99.1466	62.6985	60.4738	28.2417	26.6453	6.18665	4.44934	0.175537	0.00150839	0.694382	0.012378
608.12	102.254	99.1429	62.5501	60.4716	28.1013	26.6443	6.05493	4.44917	0.0222626	0.00150833	0.541489	0.0123775
609.12	102.183	99.1392	62.429	60.4693	27.9846	26.6433	5.95595	4.44901	-0.0826721	0.00150827	0.398041	0.0123771
610.12	102.121	99.1355	62.3509	60.4671	27.8778	26.6423	5.84712	4.44884	-0.191498	0.00150822	0.286636	0.0123766
611.12	102.059	99.1318	62.269	60.4648	27.7688	26.6414	5.75728	4.44867	-0.29306	0.00150816	0.186569	0.0123761
612.12	102.004	99.1281	62.2059	60.4626	27.6717	26.6404	5.66258	4.44851	-0.380478	0.0015081	0.116257	0.0123757
613.12	101.948	99.1244	62.1669	60.4604	27.6014	26.6394	5.58969	4.44834	-0.468292	0.00150805	0.0489044	0.0123752
614.12	101.907	99.1207	62.1163	60.4581	27.5218	26.6384	5.53392	4.44818	-0.516266	0.00150799	-0.0126495	0.0123748
615.12	101.883	99.1171	62.0484	60.4559	27.4846	26.6374	5.51196	4.44801	-0.567429	0.00150794	-0.0561676	0.0123743
616.12	101.856	99.1134	61.96	60.4536	27.468	26.6364	5.45633	4.44785	-0.594391	0.00150788	-0.0946808	0.0123738
617.12	101.827	99.1097	61.9169	60.4514	27.4413	26.6354	5.39774	4.44768	-0.606491	0.00150782	-0.113831	0.0123734
618.12	101.814	99.106	61.8676	60.4491	27.429	26.6344	5.37079	4.44751	-0.628448	0.00150777	-0.145462	0.0123729
619.12	101.793	99.1023	61.827	60.4469	27.4095	26.6335	5.34695	4.44735	-0.642197	0.00150771	-0.169449	0.0123725
620.12	101.773	99.0986	61.7952	60.4446	27.3778	26.6325	5.28165	4.44718	-0.652435	0.00150765	-0.196243	0.012372
621.12	101.722	99.0949	61.7616	60.4424	27.3436	26.6315	5.24055	4.44702	-0.660248	0.0015076	-0.235306	0.0123715
622.12	101.703	99.0912	61.7323	60.4402	27.3075	26.6305	5.19868	4.44685	-0.676804	0.00150754	-0.271011	0.0123711
623.12	101.676	99.0875	61.7026	60.4379	27.2612	26.6295	5.16	4.44669	-0.703217	0.00150748	-0.298355	0.0123706
624.12	101.645	99.0838	61.6548	60.4357	27.2104	26.6285	5.14345	4.44652	-0.720322	0.00150743	-0.324768	0.0123701
625.12	101.609	99.0801	61.6127	60.4334	27.1747	26.6275	5.12392	4.44636	-0.762192	0.00150737	-0.337036	0.0123697
626.12	101.589	99.0764	61.5692	60.4312	27.1522	26.6265	5.10439	4.44619	-0.79306	0.00150732	-0.348755	0.0123692
627.12	101.559	99.0727	61.5501	60.4289	27.1116	26.6255	5.0629	4.44602	-0.817429	0.00150726	-0.363831	0.0123688
628.12	101.523	99.069	61.5305	60.4267	27.0862	26.6246	5.05345	4.44586	-0.844391	0.0015072	-0.376099	0.0123683
629.12	101.485	99.0653	61.5237	60.4245	27.0652	26.6236	5.06274	4.44569	-0.844391	0.00150715	-0.388351	0.0123678
630.12	101.453	99.0617	61.5339	60.4222	27.067	26.6226	5.05345	4.44553	-0.85907	0.00150709	-0.390778	0.0123674
631.12	101.438	99.058	61.5427	60.42	27.0505	26.6216	5.04321	4.44536	-0.856644	0.00150703	-0.39563	0.0123669
632.12	101.426	99.0543	61.5501	60.4177	27.0261	26.6206	5.03876	4.4452	-0.866882	0.00150698	-0.407349	0.0123664
633.12	101.414	99.0506	61.538	60.4155	27.028	26.6196	5.04173	4.44503	-0.871338	0.00150692	-0.42688	0.012366
634.12	101.406	99.0469	61.5233	60.4132	27.0309	26.6186	5.03595	4.44487	-0.85907	0.00150687	-0.434692	0.0123655
635.12	101.391	99.0432	61.495	60.411	27.0505	26.6176	4.99837	4.4447	-0.875641	0.00150681	-0.453674	0.0123651
636.12	101.387	99.0395	61.4628	60.4087	27.0456	26.6167	4.98071	4.44453	-0.88736	0.00150675	-0.46109	0.0123646
637.12	101.368	99.0358	61.4379	60.4065	27.0354	26.6157	4.97142	4.44437	-0.895172	0.0015067	-0.45813	0.0123641
638.12	101.352	99.0321	61.4198	60.4043	27.0378	26.6147	4.96118	4.4442	-0.890717	0.00150664	-0.450851	0.0123637
639.12	101.347	99.0284	61.4016	60.402	27.0354	26.6137	4.94946	4.44404	-0.899612	0.00150658	-0.441559	0.0123632
640.12	101.317	99.0247	61.3827	60.3998	27.0237	26.6127	4.93236	4.44387	-0.898132	0.00150653	-0.434296	0.0123628
641.12	101.3	99.0211	61.3899	60.3975	27.0144	26.6117	4.92938	4.44371	-0.907425	0.00150647	-0.419601	0.0123623
642.12	101.278	99.0174	61.3782	60.3953	27.0042	26.6107	4.92508	4.44354	-0.909851	0.00150642	-0.437103	0.0123618
643.12	101.261	99.0137	61.3782	60.3931	27.0066	26.6097	4.92899	4.44338	-0.914307	0.00150636	-0.45813	0.0123614
644.12	101.231	99.01	61.3777	60.3908	26.9965	26.6088	4.92172	4.44321	-0.926956	0.0015063	-0.46257	0.0123609
645.12	101.203	99.0063	61.3631	60.3886	26.9831	26.6078	4.92212	4.44304	-0.934235	0.00150625	-0.465942	0.0123605
646.12	101.196	99.0026	61.347	60.3863	26.992	26.6068	4.92508	4.44288	-0.956573	0.00150619	-0.465942	0.01236
647.12	101.196	98.9989	61.3421	60.3841	26.9749	26.6058	4.9368	4.44271	-0.977737	0.00150613	-0.476166	0.0123595
648.12	101.184	98.9952	61.3313	60.3818	26.9578	26.6048	4.92508	4.44255	-0.973297	0.00150608	-0.48938	0.0123591
649.12	101.176	98.9915	61.3319	60.3796	26.9441	26.6038	4.92938	4.44238	-0.968445	0.00150602	-0.497192	0.0123586
650.12	101.159	98.9878	61.3226	60.3774	26.9411	26.6028	4.92455	4.44222	-0.953766	0.00150597	-0.478195	0.0123581
651.12	101.141	98.9842	61.3123	60.3751	26.929	26.6018	4.90704	4.44205	-0.953369	0.00150591	-0.468903	0.0123577
652.12	101.137	98.9805	61.3075	60.3729	26.9216	26.6009	4.88158	4.44189	-0.945953	0.00150585	-0.465942	0.0123572
653.12	101.117	98.9768	61.288	60.3706	26.9212	26.5999	4.86353	4.44172	-0.948914	0.0015058	-0.465393	0.0123568
654.12	101.106	98.9731	61.2733	60.3684	26.9143	26.5989	4.85461	4.44156	-0.965485	0.00150574	-0.458664	0.0123563
655.12	101.087	98.9694	61.2567	60.3661	26.9216	26.5979	4.85181	4.44139	-0.985016	0.00150569	-0.449371	0.0123558
656.12	101.082	98.9657	61.2255	60.3639	26.9288	26.5969	4.8347	4.44122	-0.999695	0.00150563	-0.450851	0.0123554
657.12	101.079	98.962	61.2302	60.3617	26.9459	26.5959	4.83656	4.44106	-1.01627	0.00150557	-0.46109	0.0123549
658.12	101.051	98.9583	61.2298	60.3594	26.9489	26.5949	4.85907	4.44089	-1.0358	0.00150552	-0.465546	0.0123545
659.12	101.031	98.9546	61.2102	60.3572	26.9532	26.594	4.86688	4.44073	-1.04805	0.00150546	-0.465546	0.012354
660.12	101.001	98.951	61.2106	60.3549	26.9684	26.593	4.86205	4.44056	-1.05829	0.0015054	-0.458282	0.0123535
661.12	100.98	98.9473	61.2102	60.3527	26.9802	26.592	4.85907	4.4404	-1.06274	0.00150535	-0.46109	0.0123531
662.12	100.977	98.9436	61.2054	60.3505	26.9636	26.591	4.85907	4.44023	-1.06274	0.00150529	-0.477661	0.0123526
663.12	100.95	98.9399	61.203	60.3482	26.9534	26.59	4.85126	4.44007	-1.06274	0.00150524	-0.497192	0.0123521
664.12	100.934	98.9362	61.1985	60.346	26.9411	26.589	4.84399	4.4399	-1.05063	0.00150518	-0.505005	0.0123517
665.12	100.946	98.9325	61.2054	60.3437	26.9294	26.588	4.83954	4.43974	-1.05977	0.00150512	-0.516724	0.0123512
666.12	100.941	98.9288	61.2074	60.3415	26.9216	26.587	4.84735	4.43957	-1.07056	0.00150507	-0.519135	0.0123508
667.12	100.93	98.9251	61.1747	60.3393	26.9167	26.5861	4.84251	4.43941	-1.07486	0.00150501	-0.508911	0.0123503
668.12	100.926	98.9215	61.1546	60.337	26.9065	26.5851	4.83173	4.43924	-1.07782	0.00150495	-0.516724	0.0123498
669.12	100.933	98.9178	61.1399	60.3348	26.905	26.5841	4.82484	4.43907	-1.08954	0.0015049	-0.528442	0.0123494
670.12	100.943	98.9141	61.1248	60.3325	26.8948	26.5831	4.81555	4.43891	-1.0793	0.00150484	-0.528976	0.0123489
671.12	100.933	98.9104	61.0843	60.3303	26.9099	26.5821	4.82001	4.43874	-1.07782	0.00150479	-0.531952	0.0123485
672.12	100.926	98.9067	61.0545	60.3281	26.9026	26.5811	4.82484	4.43858	-1.08228	0.00150473	-0.531952	0.012348
673.12	100.918	98.903	61.0573	60.3258	26.8981	26.5801	4.84735	4.43841	-1.08673	0.00150467	-0.543671	0.0123475
674.12	100.911	98.8993	61.0549	60.3236	26.8903	26.5792	4.85423	4.43825	-1.08525	0.00150462	-0.531952	0.0123471
675.12	100.89	98.8957	61.0579	60.3213	26.8859	26.5782	4.86353	4.43808	-1.09399	0.00150456	-0.539215	0.0123466
676.12	100.88	98.892	61.0579	60.3191	26.8825	26.5772	4.8475	4.43792	-1.09845	0.00150451	-0.543671	0.0123462
677.12	100.863	98.8883	61.0579	60.3169	26.8708	26.5762	4.8304	4.43775	-1.08188	0.00150445	-0.555786	0.0123457
678.12	100.824	98.8846	61.0573	60.3146	26.8513	26.5752	4.82056	4.43759	-1.06274	0.00150439	-0.575317	0.0123452
679.12	100.798	98.8809	61.0423	60.3124	26.8434	26.5742	4.83954	4.43742	-1.05103	0.00150434	-0.589996	0.0123448
680.12	100.781	98.8772	61.0549	60.3101	26.8317	26.5732	4.84735	4.43726	-1.05533	0.00150428	-0.591476	0.0123443
681.12	100.759	98.8735	61.0501	60.3079	26.8317	26.5723	4.85461	4.43709	-1.05103	0.00150422	-0.601715	0.0123439
682.12	100.722	98.8699	61.0335	60.3057	26.8434	26.5713	4.86353	4.43693	-1.04321	0.00150417	-0.601715	0.0123434
683.12	100.703	98.8662	61.0305	60.3034	26.839	26.5703	4.86688	4.43676	-1.05533	0.00150411	-0.586639	0.0123429
684.12	100.71	98.8625	61.035	60.3012	26.8362	26.5693	4.86205	4.4366	-1.06274	0.00150406	-0.591476	0.0123425
685.12	100.688	98.8588	61.0257	60.2989	26.8317	26.5683	4.83228	4.43643	-1.07001	0.001504	-0.574921	0.012342
686.12	100.676	98.8551	61.0305	60.2967	26.8273	26.5673	4.80789	4.43626	-1.06758	0.00150394	-0.574921	0.0123415
687.12	100.676	98.8514	61.0423	60.2945	26.8049	26.5663	4.80048	4.4361	-1.07486	0.00150389	-0.587036	0.0123411
688.12	100.664	98.8478	61.0549	60.2922	26.7737	26.5653	4.7843	4.43593	-1.08508	0.00150383	-0.582733	0.0123406
689.12	100.664	98.8441	61.0648	60.29	26.757	26.5644	4.78578	4.43577	-1.09883	0.00150378	-0.594849	0.0123402
690.12	100.645	98.8404	61.0545	60.2878	26.7536	26.5634	4.80087	4.4356	-1.09439	0.00150372	-0.589996	0.0123397
691.12	100.649	98.8367	61.0428	60.2855	26.7491	26.5624	4.81555	4.43544	-1.09735	0.00150366	-0.598755	0.0123392
692.12	100.645	98.833	61.0335	60.2833	26.7584	26.5614	4.82484	4.43527	-1.09883	0.00150361	-0.601715	0.0123388
693.12	100.633	98.8293	61.0233	60.281	26.757	26.5604	4.85461	4.43511	-1.08954	0.00150355	-0.586639	0.0123383
694.12	100.625	98.8257	61.0023	60.2788	26.7663	26.5594	4.87563	4.43494	-1.10649	0.00150349	-0.579758	0.0123379
695.12	100.613	98.822	60.9993	60.2766	26.7692	26.5585	4.8786	4.43478	-1.1286	0.00150344	-0.570084	0.0123374
696.12	100.598	98.8183	60.992	60.2743	26.7809	26.5575	4.88158	4.43461	-1.13008	0.00150338	-0.559845	0.0123369
697.12	100.582	98.8146	60.9755	60.2721	26.7927	26.5565	4.86649	4.43445	-1.14087	0.00150333	-0.555389	0.0123365
698.12	100.579	98.8109	60.9677	60.2699	26.7956	26.5555	4.85181	4.43428	-1.14775	0.00150327	-0.550934	0.012336
699.12	100.567	98.8072	60.9409	60.2676	26.8044	26.5545	4.83524	4.43412	-1.15219	0.00150321	-0.540695	0.0123356
700.12	100.554	98.8036	60.9169	60.2654	26.8122	26.5535	4.82742	4.43395	-1.13321	0.00150316	-0.543121	0.0123351
701.12	100.535	98.7999	60.8856	60.2631	26.8239	26.5525	4.80789	4.43379	-1.12579	0.0015031	-0.540695	0.0123346
702.12	100.528	98.7962	60.8782	60.2609	26.8122	26.5516	4.81313	4.43362	-1.13603	0.00150305	-0.550934	0.0123342
703.12	100.504	98.7925	60.8903	60.2587	26.8122	26.5506	4.82782	4.43346	-1.13306	0.00150299	-0.543671	0.0123337
704.12	100.492	98.7888	60.8782	60.2564	26.8044	26.5496	4.82782	4.43329	-1.13789	0.00150293	-0.543671	0.0123333
705.12	100.477	98.7851	60.8855	60.2542	26.8049	26.5486	4.82336	4.43313	-1.13306	0.00150288	-0.555389	0.0123328
706.12	100.464	98.7815	60.8942	60.252	26.7956	26.5476	4.81555	4.43296	-1.13345	0.00150282	-0.555389	0.0123323
707.12	100.457	98.7778	60.9138	60.2497	26.7854	26.5466	4.82001	4.4328	-1.1286	0.00150277	-0.555389	0.0123319
708.12	100.446	98.7741	60.9284	60.2475	26.7737	26.5456	4.79767	4.43263	-1.12134	0.00150271	-0.535858	0.0123314
709.12	100.45	98.7704	60.926	60.2452	26.7571	26.5447	4.77704	4.43247	-1.10181	0.00150265	-0.528976	0.012331
710.12	100.422	98.7667	60.929	60.243	26.7692	26.5437	4.79602	4.4323	-1.09399	0.0015026	-0.524139	0.0123305
711.12	100.419	98.7631	60.9216	60.2408	26.7761	26.5427	4.80048	4.43214	-1.09439	0.00150254	-0.524139	0.01233
712.12	100.414	98.7594	60.9362	60.2385	26.7659	26.5417	4.80103	4.43197	-1.09399	0.00150248	-0.511871	0.0123296
713.12	100.41	98.7557	60.9212	60.2363	26.7566	26.5407	4.80829	4.43181	-1.08228	0.00150243	-0.505005	0.0123291
714.12	100.406	98.752	60.9095	60.2341	26.7536	26.5397	4.8161	4.43164	-1.08267	0.00150237	-0.519684	0.0123287
715.12	100.402	98.7483	60.8899	60.2318	26.7536	26.5387	4.82782	4.43148	-1.08954	0.00150232	-0.547974	0.0123282
716.12	100.392	98.7447	60.8778	60.2296	26.7463	26.5378	4.82298	4.43131	-1.09883	0.00150226	-0.567505	0.0123277
717.12	100.383	98.741	60.8505	60.2273	26.7374	26.5368	4.82782	4.43115	-1.10478	0.0015022	-0.579758	0.0123273
718.12	100.363	98.7373	60.8168	60.2251	26.7341	26.5358	4.83954	4.43098	-1.09454	0.00150215	-0.594452	0.0123268
719.12	100.348	98.7336	60.7958	60.2229	26.7224	26.5348	4.84009	4.43082	-1.10907	0.00150209	-0.609146	0.0123264
720.12	100.327	98.7299	60.7952	60.2206	26.7224	26.5338	4.82352	4.43065	-1.10626	0.00150204	-0.606171	0.0123259
721.12	100.293	98.7263	60.7805	60.2184	26.7073	26.5328	4.82782	4.43049	-1.10181	0.00150198	-0.606171	0.0123254
722.12	100.29	98.7226	60.7733	60.2162	26.6911	26.5319	4.8347	4.43032	-1.10181	0.00150192	-0.591476	0.012325
723.12	100.274	98.7189	60.7761	60.2139	26.6838	26.5309	4.85126	4.43016	-1.08228	0.00150187	-0.59726	0.0123245
724.12	100.261	98.7152	60.7927	60.2117	26.6984	26.5299	4.85181	4.42999	-1.07782	0.00150181	-0.611008	0.0123241
725.12	100.263	98.7115	60.7811	60.2095	26.6985	26.5289	4.86205	4.42983	-1.0672	0.00150176	-0.61438	0.0123236
726.12	100.254	98.7079	60.764	60.2072	26.6956	26.5279	4.89032	4.42966	-1.05103	0.0015017	-0.621246	0.0123231
727.12	100.266	98.7042	60.7688	60.205	26.7184	26.5269	4.89532	4.4295	-1.03876	0.00150164	-0.598907	0.0123227
728.12	100.266	98.7005	60.7688	60.2028	26.737	26.526	4.88158	4.42933	-1.03633	0.00150159	-0.582336	0.0123222
729.12	100.261	98.6968	60.761	60.2005	26.7225	26.525	4.8782	4.42917	-1.04657	0.00150153	-0.570465	0.0123218
730.12	100.278	98.6932	60.761	60.1983	26.703	26.524	4.86649	4.429	-1.05533	0.00150148	-0.567108	0.0123213
731.12	100.278	98.6895	60.7541	60.1961	26.6911	26.523	4.85626	4.42884	-1.08267	0.00150142	-0.552414	0.0123208
732.12	100.269	98.6858	60.7644	60.1938	26.679	26.522	4.83524	4.42867	-1.1022	0.00150136	-0.550934	0.0123204
733.12	100.254	98.6821	60.7659	60.1916	26.6673	26.521	4.82352	4.42851	-1.10907	0.00150131	-0.555786	0.0123199
734.12	100.224	98.6784	60.7761	60.1893	26.6599	26.52	4.8304	4.42834	-1.12564	0.00150125	-0.567505	0.0123195
735.12	100.21	98.6748	60.7805	60.1871	26.6667	26.5191	4.82501	4.42818	-1.14517	0.0015012	-0.567505	0.012319
736.12	100.188	98.6711	60.7805	60.1849	26.6565	26.5181	4.8157	4.42801	-1.14813	0.00150114	-0.562653	0.0123185
737.12	100.171	98.6674	60.7733	60.1826	26.655	26.5171	4.81126	4.42785	-1.15689	0.00150108	-0.567505	0.0123181
738.12	100.149	98.6637	60.7567	60.1804	26.6565	26.5161	4.82056	4.42768	-1.15742	0.00150103	-0.567505	0.0123176
739.12	100.133	98.6601	60.7523	60.1782	26.6448	26.5151	4.82782	4.42752	-1.14032	0.00150097	-0.567505	0.0123172
740.12	100.113	98.6564	60.7342	60.1759	26.6238	26.5141	4.83954	4.42735	-1.14517	0.00150092	-0.567505	0.0123167
741.12	100.094	98.6527	60.7298	60.1737	26.6208	26.5132	4.84735	4.42719	-1.14032	0.00150086	-0.563202	0.0123162
742.12	100.086	98.649	60.718	60.1715	26.6208	26.5122	4.86205	4.42702	-1.13008	0.0015008	-0.563202	0.0123158
743.12	100.074	98.6453	60.7249	60.1692	26.6331	26.5112	4.87134	4.42686	-1.12079	0.00150075	-0.555389	0.0123153
744.12	100.067	98.6417	60.7102	60.167	26.655	26.5102	4.86649	4.42669	-1.11055	0.00150069	-0.555786	0.0123149
745.12	100.067	98.638	60.7102	60.1648	26.6595	26.5092	4.85181	4.42653	-1.10907	0.00150063	-0.563202	0.0123144
746.12	100.067	98.6343	60.703	60.1625	26.6643	26.5082	4.84251	4.42636	-1.09883	0.00150058	-0.563202	0.0123139
747.12	100.067	98.6306	60.6937	60.1603	26.6526	26.5073	4.83228	4.4262	-1.09735	0.00150052	-0.563202	0.0123135
748.12	100.048	98.627	60.6957	60.1581	26.6433	26.5063	4.82298	4.42603	-1.09883	0.00150047	-0.550934	0.012313
749.12	100.038	98.6233	60.6864	60.1558	26.6325	26.5053	4.80531	4.42587	-1.10907	0.00150041	-0.547974	0.0123126
750.12	100.015	98.6196	60.6624	60.1536	26.613	26.5043	4.80383	4.4257	-1.10626	0.00150035	-0.550934	0.0123121
751.12	100.013	98.6159	60.6591	60.1514	26.6178	26.5033	4.80087	4.42554	-1.10907	0.0015003	-0.540695	0.0123116
752.12	100.011	98.6123	60.6371	60.1491	26.6359	26.5023	4.81259	4.42537	-1.12079	0.00150024	-0.543518	0.0123112
753.12	100.001	98.6086	60.6312	60.1469	26.6399	26.5014	4.81555	4.42521	-1.11353	0.00150019	-0.555786	0.0123107
754.12	99.9768	98.6049	60.6204	60.1447	26.6282	26.5004	4.82524	4.42504	-1.10571	0.00150013	-0.567505	0.0123103
755.12	99.965	98.6012	60.5966	60.1424	26.6135	26.4994	4.8429	4.42488	-1.09883	0.00150007	-0.570465	0.0123098
756.12	99.9528	98.5976	60.5936	60.1402	26.6087	26.4984	4.85219	4.42471	-1.10181	0.00150002	-0.571945	0.0123093
757.12	99.9304	98.5939	60.5696	60.138	26.5895	26.4974	4.85516	4.42455	-1.10907	0.00149996	-0.575317	0.0123089
758.12	99.9021	98.5902	60.5531	60.1357	26.5652	26.4964	4.85477	4.42438	-1.11353	0.00149991	-0.574921	0.0123084
759.12	99.8869	98.5865	60.5305	60.1335	26.567	26.4955	4.84251	4.42422	-1.11353	0.00149985	-0.574921	0.012308
760.12	99.8797	98.5829	60.5184	60.1313	26.5695	26.4945	4.82742	4.42405	-1.10626	0.00149979	-0.570465	0.0123075
761.12	99.8586	98.5792	60.5159	60.129	26.5788	26.4935	4.80789	4.42389	-1.08228	0.00149974	-0.586639	0.012307
762.12	99.8479	98.5755	60.511	60.1268	26.5817	26.4925	4.79321	4.42372	-1.07056	0.00149968	-0.579376	0.0123066
763.12	99.8527	98.5719	60.511	60.1246	26.5817	26.4915	4.78876	4.42356	-1.07056	0.00149963	-0.574921	0.0123061
764.12	99.8557	98.5682	60.5188	60.1223	26.5817	26.4905	4.78876	4.4234	-1.05791	0.00149957	-0.574921	0.0123057
765.12	99.8629	98.5645	60.5305	60.1201	26.57	26.4896	4.80048	4.42323	-1.06274	0.00149952	-0.563202	0.0123052
766.12	99.8674	98.5608	60.5505	60.1179	26.5622	26.4886	4.80048	4.42307	-1.08711	0.00149946	-0.538834	0.0123047
767.12	99.8752	98.5572	60.5648	60.1156	26.5505	26.4876	4.79602	4.4229	-1.11353	0.0014994	-0.524139	0.0123043
768.12	99.8601	98.5535	60.5623	60.1134	26.5505	26.4866	4.80048	4.42274	-1.12822	0.00149935	-0.521164	0.0123038
769.12	99.8361	98.5498	60.5696	60.1112	26.5652	26.4856	4.78876	4.42257	-1.12524	0.00149929	-0.531403	0.0123034
770.12	99.8365	98.5461	60.5648	60.109	26.5622	26.4846	4.80048	4.42241	-1.12524	0.00149924	-0.524139	0.0123029
771.12	99.8196	98.5425	60.5473	60.1067	26.5817	26.4837	4.79359	4.42224	-1.11353	0.00149918	-0.516327	0.0123025
772.12	99.8166	98.5388	60.5218	60.1045	26.6057	26.4827	4.80345	4.42208	-1.10571	0.00149912	-0.528442	0.012302
773.12	99.8049	98.5351	60.4989	60.1023	26.6282	26.4817	4.80548	4.42191	-1.08228	0.00149907	-0.536255	0.0123015
774.12	99.8049	98.5314	60.4915	60.1	26.6131	26.4807	4.81126	4.42175	-1.0793	0.00149901	-0.547974	0.0123011
775.12	99.7898	98.5278	60.4842	60.0978	26.5891	26.4797	4.81274	4.42158	-1.10181	0.00149896	-0.562653	0.0123006
776.12	99.7615	98.5241	60.468	60.0956	26.5696	26.4787	4.81126	4.42142	-1.12079	0.0014989	-0.571945	0.0123002
777.12	99.7536	98.5204	60.468	60.0933	26.5384	26.4778	4.80103	4.42125	-1.12524	0.00149884	-0.570465	0.0122997
778.12	99.7385	98.5168	60.4675	60.0911	26.5188	26.4768	4.77664	4.42109	-1.13306	0.00149879	-0.579758	0.0122992
779.12	99.7199	98.5131	60.4724	60.0889	26.4993	26.4758	4.76923	4.42092	-1.13008	0.00149873	-0.582733	0.0122988
780.12	99.7106	98.5094	60.4651	60.0866	26.4889	26.4748	4.75751	4.42076	-1.12134	0.00149868	-0.563202	0.0122983
781.12	99.7272	98.5057	60.4709	60.0844	26.4874	26.4738	4.75751	4.4206	-1.1022	0.00149862	-0.531952	0.0122979
782.12	99.7461	98.5021	60.4846	60.0822	26.504	26.4729	4.75751	4.42043	-1.09735	0.00149856	-0.519684	0.0122974
783.12	99.7463	98.4984	60.5066	60.0799	26.5114	26.4719	4.7843	4.42027	-1.10181	0.00149851	-0.528442	0.0122969
784.12	99.7195	98.4947	60.4993	60.0777	26.5036	26.4709	4.80531	4.4201	-1.10181	0.00149845	-0.531403	0.0122965
785.12	99.6838	98.4911	60.4915	60.0755	26.504	26.4699	4.82001	4.41994	-1.09454	0.0014984	-0.521164	0.012296
786.12	99.6594	98.4874	60.4798	60.0733	26.5118	26.4689	4.82298	4.41977	-1.08525	0.00149834	-0.531403	0.0122956
787.12	99.6297	98.4837	60.4647	60.071	26.5192	26.4679	4.83173	4.41961	-1.09399	0.00149828	-0.540695	0.0122951
788.12	99.5867	98.4801	60.4485	60.0688	26.5144	26.467	4.85126	4.41944	-1.07501	0.00149823	-0.531952	0.0122946
789.12	99.5772	98.4764	60.4286	60.0666	26.5163	26.466	4.85126	4.41928	-1.07001	0.00149817	-0.524139	0.0122942
790.12	99.5714	98.4727	60.4091	60.0643	26.5309	26.465	4.84399	4.41911	-1.07446	0.00149812	-0.507584	0.0122937
791.12	99.5744	98.469	60.4016	60.0621	26.5261	26.464	4.84735	4.41895	-1.0793	0.00149806	-0.496796	0.0122933
792.12	99.567	98.4654	60.3778	60.0599	26.5354	26.463	4.84009	4.41878	-1.08954	0.001498	-0.489914	0.0122928
793.12	99.5621	98.4617	60.3514	60.0576	26.5577	26.4621	4.82298	4.41862	-1.08228	0.00149795	-0.49234	0.0122924
794.12	99.5471	98.458	60.3391	60.0554	26.5622	26.4611	4.81313	4.41846	-1.11392	0.00149789	-0.504456	0.0122919
795.12	99.5275	98.4544	60.3395	60.0532	26.5622	26.4601	4.8161	4.41829	-1.13345	0.00149784	-0.516724	0.0122914
796.12	99.5207	98.4507	60.3464	60.051	26.5475	26.4591	4.82336	4.41813	-1.14032	0.00149778	-0.521164	0.012291
797.12	99.5158	98.447	60.3587	60.0487	26.5505	26.4581	4.82001	4.41796	-1.14478	0.00149772	-0.531403	0.0122905
798.12	99.4993	98.4434	60.3635	60.0465	26.5505	26.4571	4.80829	4.4178	-1.13789	0.00149767	-0.540695	0.0122901
799.12	99.4846	98.4397	60.3737	60.0443	26.5427	26.4562	4.80829	4.41763	-1.14087	0.00149761	-0.538834	0.0122896
800.12	99.4894	98.436	60.3905	60.042	26.5431	26.4552	4.80048	4.41747	-1.13306	0.00149756	-0.536407	0.0122891
801.12	99.5041	98.4324	60.3929	60.0398	26.5505	26.4542	4.77704	4.4173	-1.10962	0.0014975	-0.543671	0.0122887
802.12	99.5231	98.4287	60.3827	60.0376	26.5505	26.4532	4.78876	4.41714	-1.12119	0.00149745	-0.543671	0.0122882
803.12	99.5158	98.425	60.3855	60.0354	26.5188	26.4522	4.80048	4.41697	-1.13345	0.00149739	-0.531952	0.0122878
804.12	99.5041	98.4214	60.3944	60.0331	26.5114	26.4513	4.80103	4.41681	-1.14517	0.00149733	-0.538834	0.0122873
805.12	99.5041	98.4177	60.3851	60.0309	26.5066	26.4503	4.80829	4.41665	-1.14813	0.00149728	-0.540695	0.0122868
806.12	99.4968	98.414	60.3869	60.0287	26.5042	26.4493	4.80383	4.41648	-1.14478	0.00149722	-0.543671	0.0122864
807.12	99.4803	98.4103	60.3903	60.0264	26.5183	26.4483	4.80829	4.41632	-1.14478	0.00149717	-0.538834	0.0122859
808.12	99.4607	98.4067	60.386	60.0242	26.5276	26.4473	4.79321	4.41615	-1.14478	0.00149711	-0.528976	0.0122855
809.12	99.4529	98.403	60.3812	60.022	26.5237	26.4463	4.79173	4.41599	-1.14478	0.00149705	-0.524139	0.012285
810.12	99.4382	98.3993	60.3587	60.0198	26.5261	26.4454	4.78876	4.41582	-1.13306	0.001497	-0.524139	0.0122846
811.12	99.429	98.3957	60.3514	60.0175	26.5188	26.4444	4.80048	4.41566	-1.12524	0.00149694	-0.519302	0.0122841
812.12	99.4377	98.392	60.3421	60.0153	26.5036	26.4434	4.80789	4.41549	-1.11836	0.00149689	-0.509064	0.0122836
813.12	99.4304	98.3883	60.327	60.0131	26.4841	26.4424	4.79617	4.41533	-1.12134	0.00149683	-0.511871	0.0122832
814.12	99.4021	98.3847	60.3075	60.0108	26.4767	26.4414	4.78149	4.41517	-1.09009	0.00149677	-0.516327	0.0122827
815.12	99.3709	98.381	60.285	60.0086	26.4655	26.4405	4.76439	4.415	-1.07056	0.00149672	-0.516327	0.0122823
816.12	99.3484	98.3773	60.2805	60.0064	26.4562	26.4395	4.75415	4.41484	-1.07782	0.00149666	-0.501633	0.0122818
817.12	99.3196	98.3737	60.2688	60.0042	26.4606	26.4385	4.74969	4.41467	-1.08711	0.00149661	-0.500153	0.0122813
818.12	99.2976	98.37	60.2487	60.0019	26.4679	26.4375	4.74969	4.41451	-1.11688	0.00149655	-0.497192	0.0122809
819.12	99.2809	98.3664	60.2389	59.9997	26.4841	26.4365	4.73798	4.41434	-1.12094	0.0014965	-0.505005	0.0122804
820.12	99.2775	98.3627	60.237	59.9975	26.4695	26.4356	4.74969	4.41418	-1.12134	0.00149644	-0.504608	0.01228
821.12	99.2779	98.359	60.2419	59.9952	26.4753	26.4346	4.76477	4.41401	-1.12617	0.00149638	-0.511871	0.0122795
822.12	99.2731	98.3554	60.2346	59.993	26.4724	26.4336	4.76923	4.41385	-1.12915	0.00149633	-0.528976	0.0122791
823.12	99.2628	98.3517	60.218	59.9908	26.4724	26.4326	4.77368	4.41369	-1.12134	0.00149627	-0.543671	0.0122786
824.12	99.2536	98.348	60.2015	59.9886	26.4577	26.4316	4.77704	4.41352	-1.10962	0.00149622	-0.543671	0.0122781
825.12	99.2389	98.3444	60.1834	59.9863	26.4684	26.4307	4.78149	4.41336	-1.10907	0.00149616	-0.550934	0.0122777
826.12	99.2389	98.3407	60.1741	59.9841	26.4558	26.4297	4.79657	4.41319	-1.11353	0.0014961	-0.548508	0.0122772
827.12	99.2536	98.337	60.1717	59.9819	26.4577	26.4287	4.78876	4.41303	-1.11353	0.00149605	-0.558746	0.0122768
828.12	99.2312	98.3334	60.1673	59.9797	26.4606	26.4277	4.7722	4.41286	-1.10922	0.00149599	-0.548508	0.0122763
829.12	99.2223	98.3297	60.1673	59.9774	26.4684	26.4267	4.76234	4.4127	-1.08969	0.00149594	-0.546478	0.0122758
830.12	99.2117	98.326	60.1907	59.9752	26.4753	26.4257	4.76477	4.41253	-1.08228	0.00149588	-0.552414	0.0122754
831.12	99.2028	98.3224	60.1981	59.973	26.4651	26.4248	4.78134	4.41237	-1.07446	0.00149583	-0.562653	0.0122749
832.12	99.1877	98.3187	60.1864	59.9708	26.4489	26.4238	4.78876	4.41221	-1.08658	0.00149577	-0.555389	0.0122745
833.12	99.1682	98.315	60.1712	59.9685	26.4558	26.4228	4.79173	4.41204	-1.11392	0.00149571	-0.571945	0.012274
834.12	99.1564	98.3114	60.1712	59.9663	26.4528	26.4218	4.79321	4.41188	-1.13306	0.00149566	-0.574921	0.0122736
835.12	99.1492	98.3077	60.1595	59.9641	26.4528	26.4208	4.78876	4.41171	-1.15244	0.0014956	-0.582733	0.0122731
836.12	99.1369	98.3041	60.1595	59.9618	26.4528	26.4199	4.76978	4.41155	-1.18423	0.00149555	-0.582336	0.0122726
837.12	99.1369	98.3004	60.1589	59.9596	26.4456	26.4189	4.75267	4.41138	-1.19611	0.00149549	-0.562805	0.0122722
838.12	99.1297	98.2967	60.1682	59.9574	26.4294	26.4179	4.73016	4.41122	-1.17953	0.00149543	-0.543671	0.0122717
839.12	99.1086	98.2931	60.179	59.9552	26.4216	26.4169	4.73056	4.41106	-1.15556	0.00149538	-0.512024	0.0122713
840.12	99.1057	98.2894	60.1663	59.9529	26.405	26.4159	4.74228	4.41089	-1.13751	0.00149532	-0.504608	0.0122708
841.12	99.1057	98.2857	60.1712	59.9507	26.4069	26.415	4.75267	4.41073	-1.13306	0.00149527	-0.496796	0.0122703
842.12	99.1057	98.2821	60.176	59.9485	26.402	26.414	4.74969	4.41056	-1.12579	0.00149521	-0.489914	0.0122699
843.12	99.1057	98.2784	60.1911	59.9463	26.4288	26.413	4.74969	4.4104	-1.1165	0.00149516	-0.500153	0.0122694
844.12	99.0861	98.2747	60.1907	59.944	26.4411	26.412	4.75415	4.41023	-1.12564	0.0014951	-0.52359	0.012269
845.12	99.0666	98.2711	60.1911	59.9418	26.4528	26.411	4.73758	4.41007	-1.14032	0.00149504	-0.528046	0.0122685
846.12	99.0592	98.2674	60.2106	59.9396	26.4694	26.4101	4.71805	4.40991	-1.13306	0.00149499	-0.521164	0.0122681
847.12	99.0549	98.2638	60.2136	59.9374	26.4796	26.4091	4.71547	4.40974	-1.12524	0.00149493	-0.519684	0.0122676
848.12	99.0354	98.2601	60.2108	59.9351	26.4962	26.4081	4.71361	4.40958	-1.10571	0.00149488	-0.528976	0.0122671
849.12	99.0275	98.2564	60.1937	59.9329	26.5157	26.4071	4.70375	4.40941	-1.11055	0.00149482	-0.531952	0.0122667
850.12	99.0041	98.2528	60.1907	59.9307	26.5431	26.4061	4.71103	4.40925	-1.10907	0.00149476	-0.550934	0.0122662
851.12	98.9963	98.2491	60.1834	59.9285	26.5577	26.4052	4.7261	4.40908	-1.10664	0.00149471	-0.536407	0.0122658
852.12	98.9773	98.2455	60.182	59.9262	26.567	26.4042	4.74954	4.40892	-1.1286	0.00149465	-0.550934	0.0122653
853.12	98.9455	98.2418	60.1717	59.924	26.5773	26.4032	4.76625	4.40876	-1.13789	0.0014946	-0.536407	0.0122649
854.12	98.9411	98.2381	60.179	59.9218	26.5696	26.4022	4.76477	4.40859	-1.15259	0.00149454	-0.524139	0.0122644
855.12	98.9381	98.2345	60.1669	59.9196	26.5427	26.4012	4.76962	4.40843	-1.15556	0.00149449	-0.512024	0.0122639
856.12	98.9459	98.2308	60.1429	59.9173	26.5159	26.4003	4.76923	4.40826	-1.15704	0.00149443	-0.512421	0.0122635
857.12	98.9528	98.2272	60.1369	59.9151	26.4919	26.3993	4.75751	4.4081	-1.14345	0.00149437	-0.504608	0.012263
858.12	98.9572	98.2235	60.1355	59.9129	26.4753	26.3983	4.76477	4.40794	-1.14478	0.00149432	-0.499771	0.0122626
859.12	98.9503	98.2198	60.1204	59.9107	26.4573	26.3973	4.76141	4.40777	-1.15259	0.00149426	-0.489532	0.0122621
860.12	98.9455	98.2162	60.094	59.9084	26.4484	26.3964	4.75453	4.40761	-1.14961	0.00149421	-0.485077	0.0122616
861.12	98.926	98.2125	60.0895	59.9062	26.4411	26.3954	4.73798	4.40744	-1.14813	0.00149415	-0.49234	0.0122612
862.12	98.902	98.2089	60.0895	59.904	26.4333	26.3944	4.74969	4.40728	-1.14478	0.0014941	-0.501633	0.0122607
863.12	98.899	98.2052	60.1115	59.9018	26.426	26.3934	4.75267	4.40711	-1.13789	0.00149404	-0.499771	0.0122603
864.12	98.8942	98.2015	60.1009	59.8995	26.4337	26.3924	4.74243	4.40695	-1.14087	0.00149398	-0.501633	0.0122598
865.12	98.8795	98.1979	60.1009	59.8973	26.4366	26.3915	4.74524	4.40679	-1.13306	0.00149393	-0.524139	0.0122594
866.12	98.8918	98.1942	60.0858	59.8951	26.4528	26.3905	4.75415	4.40662	-1.11688	0.00149387	-0.543671	0.0122589
867.12	98.8903	98.1906	60.0696	59.8929	26.4459	26.3895	4.77649	4.40646	-1.12564	0.00149382	-0.538834	0.0122584
868.12	98.8947	98.1869	60.0506	59.8907	26.4484	26.3885	4.80531	4.40629	-1.12564	0.00149376	-0.540314	0.012258
869.12	98.8869	98.1832	60.0335	59.8884	26.4528	26.3875	4.8157	4.40613	-1.1286	0.0014937	-0.543671	0.0122575
870.12	98.8752	98.1796	60.011	59.8862	26.4338	26.3866	4.80829	4.40597	-1.11836	0.00149365	-0.535858	0.0122571
871.12	98.8557	98.1759	60.0041	59.884	26.4366	26.3856	4.80103	4.4058	-1.12134	0.00149359	-0.524139	0.0122566
872.12	98.8361	98.1723	60.0021	59.8818	26.4338	26.3846	4.80345	4.40564	-1.12134	0.00149354	-0.524139	0.0122562
873.12	98.8166	98.1686	60.0032	59.8795	26.4363	26.3836	4.79321	4.40547	-1.10922	0.00149348	-0.524139	0.0122557
874.12	98.7971	98.1649	59.9842	59.8773	26.4338	26.3826	4.76439	4.40531	-1.10181	0.00149343	-0.511871	0.0122552
875.12	98.7781	98.1613	59.9794	59.8751	26.4411	26.3817	4.75453	4.40515	-1.11353	0.00149337	-0.508911	0.0122548
876.12	98.7658	98.1576	59.9602	59.8729	26.4489	26.3807	4.76962	4.40498	-1.10869	0.00149331	-0.521164	0.0122543
877.12	98.7463	98.154	59.9485	59.8706	26.4485	26.3797	4.7843	4.40482	-1.11836	0.00149326	-0.519684	0.0122539
878.12	98.7346	98.1503	59.9528	59.8684	26.429	26.3787	4.80774	4.40465	-1.13306	0.0014932	-0.524139	0.0122534
879.12	98.7415	98.1467	59.9528	59.8662	26.426	26.3777	4.80531	4.40449	-1.14087	0.00149315	-0.528976	0.012253
880.12	98.7312	98.143	59.9649	59.864	26.405	26.3768	4.82001	4.40433	-1.15556	0.00149309	-0.543671	0.0122525
881.12	98.7146	98.1393	59.9684	59.8618	26.3756	26.3758	4.82298	4.40416	-1.14532	0.00149304	-0.558365	0.012252
882.12	98.6882	98.1357	59.9753	59.8595	26.3781	26.3748	4.80548	4.404	-1.14087	0.00149298	-0.559845	0.0122516
883.12	98.679	98.132	59.9798	59.8573	26.3825	26.3738	4.78445	4.40383	-1.14047	0.00149292	-0.551086	0.0122511
884.12	98.676	98.1284	59.987	59.8551	26.3898	26.3729	4.7722	4.40367	-1.14478	0.00149287	-0.531021	0.0122507
885.12	98.6686	98.1247	59.9963	59.8529	26.3873	26.3719	4.76141	4.4035	-1.13751	0.00149281	-0.520782	0.0122502
886.12	98.6715	98.1211	60.0071	59.8506	26.402	26.3709	4.74969	4.40334	-1.1286	0.00149276	-0.516327	0.0122498
887.12	98.673	98.1174	59.9993	59.8484	26.405	26.3699	4.75453	4.40318	-1.13345	0.0014927	-0.511871	0.0122493
888.12	98.6832	98.1137	59.9993	59.8462	26.3948	26.3689	4.76477	4.40301	-1.14087	0.00149265	-0.501633	0.0122488
889.12	98.6955	98.1101	59.9876	59.844	26.402	26.368	4.76923	4.40285	-1.13306	0.00149259	-0.511871	0.0122484
890.12	98.7072	98.1064	59.987	59.8418	26.4099	26.367	4.76923	4.40268	-1.14032	0.00149253	-0.521164	0.0122479
891.12	98.7078	98.1028	59.9963	59.8395	26.4143	26.366	4.76923	4.40252	-1.14478	0.00149248	-0.512421	0.0122475
892.12	98.6985	98.0991	59.9948	59.8373	26.405	26.365	4.76196	4.40236	-1.14478	0.00149242	-0.524139	0.012247
893.12	98.6955	98.0955	60.0114	59.8351	26.402	26.364	4.74579	4.40219	-1.15704	0.00149237	-0.531952	0.0122466
894.12	98.7072	98.0918	60.0261	59.8329	26.3903	26.3631	4.75751	4.40203	-1.15704	0.00149231	-0.538834	0.0122461
895.12	98.6882	98.0882	60.035	59.8306	26.3825	26.3621	4.75267	4.40187	-1.15259	0.00149226	-0.540695	0.0122456
896.12	98.6639	98.0845	60.019	59.8284	26.3825	26.3611	4.74243	4.4017	-1.12915	0.0014922	-0.550934	0.0122452
897.12	98.6418	98.0808	59.995	59.8262	26.3825	26.3601	4.73798	4.40154	-1.1286	0.00149214	-0.579224	0.0122447
898.12	98.6252	98.0772	59.9677	59.824	26.3825	26.3592	4.73314	4.40137	-1.12134	0.00149209	-0.574921	0.0122443
899.12	98.6086	98.0735	59.9364	59.8218	26.3903	26.3582	4.74243	4.40121	-1.12079	0.00149203	-0.560226	0.0122438
900.12	98.5861	98.0699	59.929	59.8195	26.3831	26.3572	4.73813	4.40105	-1.11353	0.00149198	-0.558746	0.0122434
901.12	98.5666	98.0662	59.9095	59.8173	26.3738	26.3562	4.73314	4.40088	-1.11353	0.00149192	-0.555389	0.0122429
902.12	98.5597	98.0626	59.902	59.8151	26.363	26.3552	4.73798	4.40072	-1.11353	0.00149187	-0.543671	0.0122424
903.12	98.55	98.0589	59.8972	59.8129	26.3513	26.3543	4.73798	4.40055	-1.10626	0.00149181	-0.536255	0.012242
904.12	98.5275	98.0553	59.8948	59.8107	26.3483	26.3533	4.74969	4.40039	-1.09454	0.00149175	-0.547974	0.0122415
905.12	98.5041	98.0516	59.8972	59.8084	26.3468	26.3523	4.75751	4.40023	-1.09697	0.0014917	-0.567505	0.0122411
906.12	98.4768	98.048	59.8942	59.8062	26.3438	26.3513	4.76962	4.40006	-1.09454	0.00149164	-0.570465	0.0122406
907.12	98.4572	98.0443	59.9065	59.804	26.3706	26.3504	4.78134	4.3999	-1.08954	0.00149159	-0.579758	0.0122402
908.12	98.4455	98.0406	59.8977	59.8018	26.3751	26.3494	4.80829	4.39973	-1.09399	0.00149153	-0.601715	0.0122397
909.12	98.4576	98.037	59.8977	59.7996	26.3708	26.3484	4.82298	4.39957	-1.09399	0.00149148	-0.601868	0.0122392
910.12	98.4572	98.0333	59.8929	59.7973	26.3678	26.3474	4.80548	4.39941	-1.10611	0.00149142	-0.574524	0.0122388
911.12	98.4576	98.0297	59.8944	59.7951	26.3542	26.3464	4.79173	4.39924	-1.10181	0.00149136	-0.548126	0.0122383
912.12	98.4772	98.026	59.8856	59.7929	26.363	26.3455	4.75711	4.39908	-1.11392	0.00149131	-0.555389	0.0122379
913.12	98.465	98.0224	59.8899	59.7907	26.3557	26.3445	4.75415	4.39891	-1.11353	0.00149125	-0.558365	0.0122374
914.12	98.4533	98.0187	59.8856	59.7885	26.3513	26.3435	4.72586	4.39875	-1.12564	0.0014912	-0.535858	0.012237
915.12	98.4411	98.0151	59.8709	59.7862	26.3513	26.3425	4.71884	4.39859	-1.14032	0.00149114	-0.540695	0.0122365
916.12	98.426	98.0114	59.8734	59.784	26.3468	26.3416	4.72626	4.39842	-1.14517	0.00149109	-0.543671	0.012236
917.12	98.4064	98.0078	59.8631	59.7818	26.3557	26.3406	4.71844	4.39826	-1.14517	0.00149103	-0.543671	0.0122356
918.12	98.3947	98.0041	59.8587	59.7796	26.3317	26.3396	4.71844	4.3981	-1.15298	0.00149097	-0.531952	0.0122351
919.12	98.3918	98.0005	59.8343	59.7774	26.3317	26.3386	4.69891	4.39793	-1.1604	0.00149092	-0.519684	0.0122347
920.12	98.3903	97.9968	59.8244	59.7751	26.3317	26.3377	4.68719	4.39777	-1.15985	0.00149086	-0.521164	0.0122342
921.12	98.3869	97.9932	59.8269	59.7729	26.3196	26.3367	4.67938	4.3976	-1.16431	0.00149081	-0.519684	0.0122338
922.12	98.38	97.9895	59.8118	59.7707	26.3122	26.3357	4.67493	4.39744	-1.17212	0.00149075	-0.528976	0.0122333
923.12	98.3903	97.9859	59.8001	59.7685	26.3152	26.3347	4.6915	4.39728	-1.18867	0.0014907	-0.531952	0.0122328
924.12	98.399	97.9822	59.8001	59.7663	26.3288	26.3337	4.71063	4.39711	-1.18642	0.00149064	-0.527115	0.0122324
925.12	98.3947	97.9786	59.8001	59.764	26.3395	26.3328	4.71118	4.39695	-1.17657	0.00149059	-0.528976	0.0122319
926.12	98.3756	97.9749	59.8001	59.7618	26.3513	26.3318	4.71844	4.39679	-1.18384	0.00149053	-0.527115	0.0122315
927.12	98.3825	97.9713	59.8049	59.7596	26.3702	26.3308	4.72626	4.39662	-1.1911	0.00149047	-0.535858	0.012231
928.12	98.3722	97.9676	59.7962	59.7574	26.3752	26.3298	4.72586	4.39646	-1.18867	0.00149042	-0.524139	0.0122306
929.12	98.3512	97.964	59.8029	59.7552	26.3708	26.3289	4.70633	4.39629	-1.17953	0.00149036	-0.516327	0.0122301
930.12	98.3361	97.9603	59.7927	59.753	26.3903	26.3279	4.69461	4.39613	-1.17938	0.00149031	-0.509445	0.0122296
931.12	98.3244	97.9567	59.7737	59.7507	26.3903	26.3269	4.67938	4.39597	-1.17657	0.00149025	-0.519684	0.0122292
932.12	98.3317	97.953	59.7688	59.7485	26.3777	26.3259	4.66766	4.3958	-1.18384	0.0014902	-0.531403	0.0122287
933.12	98.3527	97.9494	59.7327	59.7463	26.363	26.325	4.65985	4.39564	-1.17953	0.00149014	-0.528976	0.0122283
934.12	98.3557	97.9457	59.7268	59.7441	26.36	26.324	4.6554	4.39548	-1.16486	0.00149008	-0.555786	0.0122278
935.12	98.3557	97.9421	59.7249	59.7419	26.3751	26.323	4.67641	4.39531	-1.1604	0.00149003	-0.574921	0.0122274
936.12	98.3557	97.9384	59.7098	59.7396	26.3708	26.322	4.68665	4.39515	-1.16766	0.00148997	-0.582733	0.0122269
937.12	98.3629	97.9348	59.703	59.7374	26.3513	26.321	4.69891	4.39498	-1.16914	0.00148992	-0.594452	0.0122265
938.12	98.3406	97.9311	59.6985	59.7352	26.3395	26.3201	4.71063	4.39482	-1.18665	0.00148986	-0.597427	0.012226
939.12	98.3196	97.9275	59.703	59.733	26.3395	26.3191	4.70337	4.39466	-1.20821	0.00148981	-0.598907	0.0122255
940.12	98.3019	97.9238	59.6937	59.7308	26.3269	26.3181	4.70673	4.39449	-1.21118	0.00148975	-0.590149	0.0122251
941.12	98.2854	97.9202	59.6834	59.7286	26.3049	26.3171	4.70673	4.39433	-1.2233	0.0014897	-0.594452	0.0122246
942.12	98.2614	97.9165	59.6624	59.7263	26.2927	26.3162	4.69891	4.39417	-1.23071	0.00148964	-0.594055	0.0122242
943.12	98.239	97.9129	59.6643	59.7241	26.2999	26.3152	4.70618	4.394	-1.24243	0.00148958	-0.579376	0.0122237
944.12	98.2268	97.9092	59.655	59.7219	26.2971	26.3142	4.70375	4.39384	-1.24243	0.00148953	-0.582733	0.0122233
945.12	98.215	97.9056	59.6716	59.7197	26.3077	26.3132	4.72571	4.39368	-1.23071	0.00148947	-0.582184	0.0122228
946.12	98.2106	97.9019	59.6784	59.7175	26.3122	26.3123	4.71844	4.39351	-1.21118	0.00148942	-0.587036	0.0122223
947.12	98.2195	97.8983	59.676	59.7153	26.317	26.3113	4.71063	4.39335	-1.19853	0.00148936	-0.594452	0.0122219
948.12	98.2219	97.8946	59.6716	59.713	26.3317	26.3103	4.71063	4.39318	-1.15704	0.00148931	-0.601715	0.0122214
949.12	98.2238	97.891	59.6862	59.7108	26.339	26.3093	4.71063	4.39302	-1.14087	0.00148925	-0.586639	0.012221
950.12	98.2223	97.8873	59.6907	59.7086	26.3513	26.3084	4.71063	4.39286	-1.13306	0.00148919	-0.579376	0.0122205
951.12	98.2316	97.8837	59.6838	59.7064	26.3362	26.3074	4.69891	4.39269	-1.12822	0.00148914	-0.570618	0.0122201
952.12	98.218	97.88	59.6741	59.7042	26.3317	26.3064	4.69594	4.39253	-1.11072	0.00148908	-0.543274	0.0122196
953.12	98.2072	97.8764	59.6595	59.702	26.3001	26.3054	4.7261	4.39237	-1.10478	0.00148903	-0.516327	0.0122192
954.12	98.1951	97.8727	59.6595	59.6997	26.2614	26.3044	4.73798	4.3922	-1.10626	0.00148897	-0.508911	0.0122187
955.12	98.1566	97.8691	59.6516	59.6975	26.2614	26.3035	4.73743	4.39204	-1.10181	0.00148892	-0.516724	0.0122182
956.12	98.1443	97.8654	59.6321	59.6953	26.2449	26.3025	4.74969	4.39188	-1.10962	0.00148886	-0.536255	0.0122178
957.12	98.1447	97.8618	59.6131	59.6931	26.2268	26.3015	4.74243	4.39171	-1.12173	0.00148881	-0.536255	0.0122173
958.12	98.1447	97.8581	59.597	59.6909	26.2296	26.3005	4.74969	4.39155	-1.13586	0.00148875	-0.539215	0.0122169
959.12	98.1447	97.8545	59.5921	59.6887	26.2389	26.2996	4.74243	4.39138	-1.15689	0.00148869	-0.535858	0.0122164
960.12	98.149	97.8508	59.5813	59.6864	26.237	26.2986	4.74095	4.39122	-1.16914	0.00148864	-0.528595	0.012216
961.12	98.1447	97.8472	59.5696	59.6842	26.2272	26.2976	4.75453	4.39106	-1.17212	0.00148858	-0.519302	0.0122155
962.12	98.1369	97.8436	59.5618	59.682	26.2224	26.2966	4.75267	4.39089	-1.17509	0.00148853	-0.509064	0.012215
963.12	98.1252	97.8399	59.5622	59.6798	26.2179	26.2957	4.73758	4.39073	-1.16486	0.00148847	-0.504608	0.0122146
964.12	98.1057	97.8363	59.5744	59.6776	26.2145	26.2947	4.73016	4.39057	-1.17212	0.00148842	-0.524139	0.0122141
965.12	98.091	97.8326	59.5847	59.6754	26.2145	26.2937	4.7229	4.3904	-1.17212	0.00148836	-0.531555	0.0122137
966.12	98.0895	97.829	59.6081	59.6731	26.2028	26.2927	4.71844	4.39024	-1.17938	0.00148831	-0.535858	0.0122132
967.12	98.0934	97.8253	59.6252	59.6709	26.1956	26.2918	4.71844	4.39008	-1.20039	0.00148825	-0.543671	0.0122128
968.12	98.091	97.8217	59.6399	59.6687	26.1911	26.2908	4.71844	4.38991	-1.20337	0.00148819	-0.543671	0.0122123
969.12	98.0934	97.818	59.6429	59.6665	26.1911	26.2898	4.72571	4.38975	-1.21118	0.00148814	-0.543121	0.0122119
970.12	98.091	97.8144	59.6248	59.6643	26.2179	26.2888	4.735	4.38959	-1.21118	0.00148808	-0.540314	0.0122114
971.12	98.0744	97.8107	59.6087	59.6621	26.2268	26.2879	4.73352	4.38942	-1.21806	0.00148803	-0.543121	0.0122109
972.12	98.0666	97.8071	59.5936	59.6599	26.218	26.2869	4.735	4.38926	-1.22736	0.00148797	-0.547577	0.0122105
973.12	98.05	97.8035	59.5774	59.6576	26.2419	26.2859	4.72626	4.3891	-1.2186	0.00148792	-0.548126	0.01221
974.12	98.0354	97.7998	59.5531	59.6554	26.2536	26.2849	4.72626	4.38893	-1.20352	0.00148786	-0.543671	0.0122096
975.12	98.0203	97.7962	59.5622	59.6532	26.2614	26.284	4.71844	4.38877	-1.19946	0.00148781	-0.555389	0.0122091
976.12	98.0041	97.7925	59.5652	59.651	26.2542	26.283	4.71361	4.38861	-1.19463	0.00148775	-0.562653	0.0122087
977.12	97.9963	97.7889	59.5666	59.6488	26.2449	26.282	4.69891	4.38844	-1.18384	0.00148769	-0.571945	0.0122082
978.12	97.965	97.7852	59.5573	59.6466	26.2419	26.281	4.67938	4.38828	-1.16431	0.00148764	-0.563202	0.0122078
979.12	97.9411	97.7816	59.5471	59.6444	26.2419	26.2801	4.67938	4.38811	-1.1768	0.00148758	-0.550934	0.0122073
980.12	97.9308	97.778	59.5573	59.6421	26.2346	26.2791	4.6725	4.38795	-1.1915	0.00148753	-0.540695	0.0122068
981.12	97.9264	97.7743	59.5549	59.6399	26.2253	26.2781	4.68274	4.38779	-1.19595	0.00148747	-0.543518	0.0122064
982.12	97.9264	97.7707	59.5573	59.6377	26.2224	26.2771	4.6915	4.38762	-1.19649	0.00148742	-0.550934	0.0122059
983.12	97.9411	97.767	59.5501	59.6355	26.2224	26.2762	4.72571	4.38746	-1.19946	0.00148736	-0.552414	0.0122055
984.12	97.9576	97.7634	59.5501	59.6333	26.2272	26.2752	4.72328	4.3873	-1.20673	0.00148731	-0.570465	0.012205
985.12	97.9455	97.7597	59.5618	59.6311	26.2419	26.2742	4.71844	4.38713	-1.21078	0.00148725	-0.567108	0.0122046
986.12	97.9407	97.7561	59.5549	59.6289	26.2491	26.2732	4.73352	4.38697	-1.20782	0.0014872	-0.579758	0.0122041
987.12	97.9304	97.7524	59.5456	59.6266	26.2536	26.2723	4.74969	4.38681	-1.2229	0.00148714	-0.577896	0.0122037
988.12	97.926	97.7488	59.5579	59.6244	26.2536	26.2713	4.76196	4.38664	-1.23071	0.00148708	-0.574921	0.0122032
989.12	97.9143	97.7452	59.5652	59.6222	26.2542	26.2703	4.74539	4.38648	-1.24969	0.00148703	-0.567657	0.0122027
990.12	97.9143	97.7415	59.5666	59.62	26.2449	26.2693	4.73798	4.38632	-1.25415	0.00148697	-0.550934	0.0122023
991.12	97.907	97.7379	59.5774	59.6178	26.2419	26.2684	4.75751	4.38615	-1.24243	0.00148692	-0.567505	0.0122018
992.12	97.8947	97.7342	59.577	59.6156	26.2346	26.2674	4.73758	4.38599	-1.23462	0.00148686	-0.574921	0.0122014
993.12	97.8904	97.7306	59.5575	59.6134	26.2302	26.2664	4.73743	4.38583	-1.2229	0.00148681	-0.579758	0.0122009
994.12	97.8782	97.727	59.5428	59.6111	26.2302	26.2654	4.73462	4.38566	-1.2229	0.00148675	-0.574921	0.0122005
995.12	97.8679	97.7233	59.5335	59.6089	26.2374	26.2645	4.71844	4.3855	-1.20337	0.0014867	-0.563202	0.0122
996.12	97.8752	97.7197	59.5302	59.6067	26.2389	26.2635	4.71118	4.38534	-1.18439	0.00148664	-0.570084	0.0121996
997.12	97.8631	97.716	59.5106	59.6045	26.2302	26.2625	4.70189	4.38517	-1.18681	0.00148658	-0.567108	0.0121991
998.12	97.8557	97.7124	59.4959	59.6023	26.2302	26.2615	4.71063	4.38501	-1.18829	0.00148653	-0.567108	0.0121986
999.12	97.8508	97.7087	59.4993	59.6001	26.2419	26.2606	4.6868	4.38485	-1.21118	0.00148647	-0.560226	0.0121982
1000.12	97.8289	97.7051	59.5038	59.5979	26.237	26.2596	4.67938	4.38468	-1.21078	0.00148642	-0.563599	0.0121977
1001.12	97.8093	97.7015	59.4945	59.5957	26.2151	26.2586	4.68422	4.38452	-1.22345	0.00148636	-0.570465	0.0121973
1002.12	97.7883	97.6978	59.4915	59.5934	26.2028	26.2576	4.69446	4.38436	-1.23759	0.00148631	-0.567505	0.0121968
1003.12	97.7658	97.6942	59.4915	59.5912	26.198	26.2567	4.70375	4.38419	-1.24689	0.00148625	-0.555389	0.0121964
1004.12	97.7707	97.6905	59.4993	59.589	26.1954	26.2557	4.70673	4.38403	-1.24243	0.0014862	-0.538834	0.0121959
1005.12	97.7731	97.6869	59.4993	59.5868	26.1959	26.2547	4.71844	4.38387	-1.25713	0.00148614	-0.528595	0.0121955
1006.12	97.7775	97.6833	59.4963	59.5846	26.1989	26.2537	4.70673	4.3837	-1.25415	0.00148609	-0.516876	0.012195
1007.12	97.7658	97.6796	59.5066	59.5824	26.1989	26.2528	4.69891	4.38354	-1.2547	0.00148603	-0.512421	0.0121945
1008.12	97.7731	97.676	59.4993	59.5802	26.1941	26.2518	4.69446	4.38338	-1.26196	0.00148597	-0.531952	0.0121941
1009.12	97.7824	97.6723	59.5036	59.578	26.2077	26.2508	4.69931	4.38321	-1.27368	0.00148592	-0.543671	0.0121936
1010.12	97.7688	97.6687	59.4993	59.5757	26.2058	26.2498	4.69931	4.38305	-1.28149	0.00148586	-0.546646	0.0121932
1011.12	97.7628	97.6651	59.487	59.5735	26.1956	26.2489	4.70618	4.38289	-1.27368	0.00148581	-0.535858	0.0121927
1012.12	97.7541	97.6614	59.4798	59.5713	26.1794	26.2479	4.71103	4.38272	-1.26938	0.00148575	-0.535858	0.0121923
1013.12	97.7584	97.6578	59.4842	59.5691	26.1911	26.2469	4.71844	4.38256	-1.24243	0.0014857	-0.535858	0.0121918
1014.12	97.7536	97.6541	59.4798	59.5669	26.1866	26.246	4.71844	4.3824	-1.23071	0.00148564	-0.516876	0.0121914
1015.12	97.7507	97.6505	59.4749	59.5647	26.1959	26.245	4.69852	4.38223	-1.21118	0.00148559	-0.492889	0.0121909
1016.12	97.7418	97.6469	59.4647	59.5625	26.2062	26.244	4.68384	4.38207	-1.20337	0.00148553	-0.49234	0.0121905
1017.12	97.7268	97.6432	59.453	59.5603	26.2077	26.243	4.67938	4.38191	-1.21548	0.00148548	-0.496796	0.01219
1018.12	97.7199	97.6396	59.4437	59.5581	26.2179	26.2421	4.66283	4.38175	-1.21844	0.00148542	-0.504608	0.0121895
1019.12	97.7229	97.636	59.4338	59.5558	26.2106	26.2411	4.65985	4.38158	-1.2229	0.00148536	-0.516724	0.0121891
1020.12	97.7102	97.6323	59.4245	59.5536	26.2179	26.2401	4.67197	4.38142	-1.2229	0.00148531	-0.543121	0.0121886
1021.12	97.6882	97.6287	59.4284	59.5514	26.2272	26.2391	4.6915	4.38126	-1.22736	0.00148525	-0.555389	0.0121882
1022.12	97.6832	97.625	59.4182	59.5492	26.2302	26.2382	4.69891	4.38109	-1.2229	0.0014852	-0.560226	0.0121877
1023.12	97.6877	97.6214	59.4095	59.547	26.2423	26.2372	4.71063	4.38093	-1.22588	0.00148514	-0.555389	0.0121873
1024.12	97.6687	97.6178	59.4167	59.5448	26.2419	26.2362	4.71063	4.38077	-1.22774	0.00148509	-0.550934	0.0121868
1025.12	97.6643	97.6141	59.426	59.5426	26.2374	26.2352	4.71063	4.3806	-1.23071	0.00148503	-0.547577	0.0121864
1026.12	97.6643	97.6105	59.4124	59.5404	26.2389	26.2343	4.70337	4.38044	-1.24243	0.00148498	-0.536255	0.0121859
1027.12	97.6715	97.6069	59.4095	59.5382	26.2419	26.2333	4.68236	4.38028	-1.23759	0.00148492	-0.540695	0.0121854
1028.12	97.6639	97.6032	59.4143	59.536	26.2374	26.2323	4.67938	4.38011	-1.22736	0.00148487	-0.539215	0.012185
1029.12	97.6492	97.5996	59.4167	59.5337	26.2419	26.2313	4.68422	4.37995	-1.2229	0.00148481	-0.535858	0.0121845
1030.12	97.6326	97.5959	59.4016	59.5315	26.2419	26.2304	4.68274	4.37979	-1.21078	0.00148475	-0.524139	0.0121841
1031.12	97.5936	97.5923	59.4216	59.5293	26.2302	26.2294	4.68719	4.37962	-1.20337	0.0014847	-0.516327	0.0121836
1032.12	97.574	97.5887	59.4334	59.5271	26.2106	26.2284	4.69165	4.37946	-1.20337	0.00148464	-0.516327	0.0121832
1033.12	97.5545	97.585	59.4173	59.5249	26.2028	26.2275	4.69446	4.3793	-1.19165	0.00148459	-0.497345	0.0121827
1034.12	97.5281	97.5814	59.4241	59.5227	26.2028	26.2265	4.70337	4.37913	-1.1911	0.00148453	-0.500153	0.0121823
1035.12	97.5158	97.5778	59.4169	59.5205	26.2077	26.2255	4.70189	4.37897	-1.18867	0.00148448	-0.505005	0.0121818
1036.12	97.5114	97.5741	59.4139	59.5183	26.2136	26.2245	4.71063	4.37881	-1.20377	0.00148442	-0.524139	0.0121814
1037.12	97.5201	97.5705	59.4046	59.5161	26.2151	26.2236	4.72328	4.37865	-1.20337	0.00148437	-0.536407	0.0121809
1038.12	97.5324	97.5669	59.4016	59.5139	26.2136	26.2226	4.73352	4.37848	-1.17509	0.00148431	-0.546646	0.0121804
1039.12	97.5504	97.5632	59.3944	59.5116	26.1956	26.2216	4.73758	4.37832	-1.16914	0.00148426	-0.563202	0.01218
1040.12	97.5597	97.5596	59.3855	59.5094	26.1911	26.2206	4.74969	4.37816	-1.17938	0.0014842	-0.567657	0.0121795
1041.12	97.5817	97.5559	59.4065	59.5072	26.1911	26.2197	4.73758	4.37799	-1.19611	0.00148414	-0.558365	0.0121791
1042.12	97.574	97.5523	59.4095	59.505	26.1837	26.2187	4.74243	4.37783	-1.17509	0.00148409	-0.548126	0.0121786
1043.12	97.5593	97.5487	59.4046	59.5028	26.1866	26.2177	4.73758	4.37767	-1.20039	0.00148403	-0.524139	0.0121782
1044.12	97.5383	97.545	59.4016	59.5006	26.1959	26.2168	4.7229	4.3775	-1.2229	0.00148398	-0.531403	0.0121777
1045.12	97.5158	97.5414	59.3899	59.4984	26.1911	26.2158	4.70673	4.37734	-1.22588	0.00148392	-0.528595	0.0121773
1046.12	97.489	97.5378	59.3869	59.4962	26.1863	26.2148	4.69891	4.37718	-1.2229	0.00148387	-0.531403	0.0121768
1047.12	97.4768	97.5341	59.3782	59.494	26.1595	26.2138	4.70172	4.37702	-1.21564	0.00148381	-0.535858	0.0121764
1048.12	97.4768	97.5305	59.3659	59.4918	26.1565	26.2129	4.71547	4.37685	-1.2229	0.00148376	-0.540695	0.0121759
1049.12	97.4768	97.5269	59.3557	59.4896	26.152	26.2119	4.70673	4.37669	-1.2186	0.0014837	-0.550934	0.0121754
1050.12	97.465	97.5232	59.3269	59.4873	26.1599	26.2109	4.70673	4.37653	-1.2229	0.00148365	-0.555389	0.012175
1051.12	97.4606	97.5196	59.3196	59.4851	26.155	26.2099	4.70673	4.37636	-1.23462	0.00148359	-0.555389	0.0121745
1052.12	97.4572	97.516	59.3001	59.4829	26.1448	26.209	4.71844	4.3762	-1.23032	0.00148354	-0.555389	0.0121741
1053.12	97.4503	97.5123	59.2733	59.4807	26.1472	26.208	4.70633	4.37604	-1.2229	0.00148348	-0.548126	0.0121736
1054.12	97.4533	97.5087	59.2688	59.4785	26.1297	26.207	4.71118	4.37587	-1.2229	0.00148342	-0.558365	0.0121732
1055.12	97.4338	97.5051	59.2688	59.4763	26.116	26.2061	4.71414	4.37571	-1.23502	0.00148337	-0.548126	0.0121727
1056.12	97.4411	97.5014	59.2805	59.4741	26.1057	26.2051	4.71361	4.37555	-1.24243	0.00148331	-0.555389	0.0121723
1057.12	97.45	97.4978	59.2884	59.4719	26.0968	26.2041	4.7229	4.37539	-1.24188	0.00148326	-0.551086	0.0121718
1058.12	97.429	97.4942	59.3001	59.4697	26.1134	26.2031	4.69423	4.37522	-1.24673	0.0014832	-0.543671	0.0121714
1059.12	97.4064	97.4905	59.3079	59.4675	26.1281	26.2022	4.67212	4.37506	-1.26627	0.00148315	-0.562653	0.0121709
1060.12	97.4064	97.4869	59.3073	59.4653	26.1295	26.2012	4.66766	4.3749	-1.27408	0.00148309	-0.567108	0.0121704
1061.12	97.3943	97.4833	59.3045	59.4631	26.1476	26.2002	4.65594	4.37473	-1.27368	0.00148304	-0.560226	0.01217
1062.12	97.3869	97.4796	59.3152	59.4609	26.1448	26.1993	4.66321	4.37457	-1.26196	0.00148298	-0.543671	0.0121695
1063.12	97.3679	97.476	59.3196	59.4586	26.1403	26.1983	4.67197	4.37441	-1.25415	0.00148293	-0.524139	0.0121691
1064.12	97.3752	97.4724	59.3123	59.4564	26.152	26.1973	4.6915	4.37424	-1.26196	0.00148287	-0.512421	0.0121686
1065.12	97.3797	97.4687	59.2958	59.4542	26.1599	26.1963	4.69891	4.37408	-1.26157	0.00148282	-0.492889	0.0121682
1066.12	97.3704	97.4651	59.2952	59.452	26.1599	26.1954	4.69446	4.37392	-1.24985	0.00148276	-0.500153	0.0121677
1067.12	97.3557	97.4615	59.285	59.4498	26.152	26.1944	4.69594	4.37376	-1.25861	0.0014827	-0.509445	0.0121673
1068.12	97.3439	97.4578	59.2684	59.4476	26.1593	26.1934	4.68236	4.37359	-1.27666	0.00148265	-0.519684	0.0121668
1069.12	97.3361	97.4542	59.2616	59.4454	26.1638	26.1924	4.67938	4.37343	-1.27814	0.00148259	-0.535858	0.0121664
1070.12	97.341	97.4506	59.2523	59.4432	26.1448	26.1915	4.67212	4.37327	-1.26157	0.00148254	-0.543671	0.0121659
1071.12	97.3244	97.447	59.2342	59.441	26.1281	26.1905	4.66766	4.3731	-1.26196	0.00148248	-0.555389	0.0121654
1072.12	97.3194	97.4433	59.2376	59.4388	26.1178	26.1895	4.65985	4.37294	-1.25899	0.00148243	-0.543671	0.012165
1073.12	97.3332	97.4397	59.2566	59.4366	26.1281	26.1886	4.65555	4.37278	-1.26923	0.00148237	-0.543671	0.0121645
1074.12	97.3361	97.4361	59.2538	59.4344	26.1325	26.1876	4.64032	4.37262	-1.26196	0.00148232	-0.536407	0.0121641
1075.12	97.3244	97.4324	59.2372	59.4322	26.1325	26.1866	4.62415	4.37245	-1.26141	0.00148226	-0.531952	0.0121636
1076.12	97.3244	97.4288	59.2298	59.43	26.1325	26.1856	4.60609	4.37229	-1.27852	0.00148221	-0.531403	0.0121632
1077.12	97.3244	97.4252	59.2298	59.4277	26.137	26.1847	4.60461	4.37213	-1.26938	0.00148215	-0.516327	0.0121627
1078.12	97.3123	97.4215	59.2108	59.4255	26.1355	26.1837	4.60165	4.37196	-1.24985	0.0014821	-0.509064	0.0121623
1079.12	97.2732	97.4179	59.1941	59.4233	26.137	26.1827	4.59438	4.3718	-1.23032	0.00148204	-0.500153	0.0121618
1080.12	97.2541	97.4143	59.2028	59.4211	26.1208	26.1818	4.60016	4.37164	-1.21564	0.00148199	-0.497726	0.0121614
1081.12	97.2707	97.4106	59.1911	59.4189	26.1085	26.1808	4.61391	4.37148	-1.21844	0.00148193	-0.500702	0.0121609
1082.12	97.2571	97.407	59.1984	59.4167	26.1134	26.1798	4.64072	4.37131	-1.2229	0.00148187	-0.507584	0.0121605
1083.12	97.239	97.4034	59.2058	59.4145	26.1208	26.1788	4.6554	4.37115	-1.23502	0.00148182	-0.509445	0.01216
1084.12	97.2346	97.3998	59.2073	59.4123	26.1178	26.1779	4.67938	4.37099	-1.2229	0.00148176	-0.507965	0.0121595
1085.12	97.2223	97.3961	59.2102	59.4101	26.1091	26.1769	4.69891	4.37082	-1.24228	0.00148171	-0.512421	0.0121591
1086.12	97.2389	97.3925	59.1985	59.4079	26.1042	26.1759	4.69891	4.37066	-1.27071	0.00148165	-0.512421	0.0121586
1087.12	97.215	97.3889	59.1859	59.4057	26.1057	26.175	4.71063	4.3705	-1.28149	0.0014816	-0.519684	0.0121582
1088.12	97.1959	97.3852	59.1712	59.4035	26.1208	26.174	4.70337	4.37034	-1.27666	0.00148154	-0.540695	0.0121577
1089.12	97.1911	97.3816	59.1712	59.4013	26.1208	26.173	4.70618	4.37017	-1.27814	0.00148149	-0.563202	0.0121573
1090.12	97.1877	97.378	59.1682	59.3991	26.1091	26.172	4.69165	4.37001	-1.28595	0.00148143	-0.558365	0.0121568
1091.12	97.176	97.3744	59.1595	59.3969	26.1013	26.1711	4.68719	4.36985	-1.26938	0.00148138	-0.555389	0.0121564
1092.12	97.1682	97.3707	59.1477	59.3947	26.1134	26.1701	4.66727	4.36969	-1.23813	0.00148132	-0.540695	0.0121559
1093.12	97.1492	97.3671	59.1546	59.3925	26.116	26.1691	4.66766	4.36952	-1.2229	0.00148127	-0.531403	0.0121555
1094.12	97.1282	97.3635	59.1488	59.3903	26.0934	26.1682	4.66283	4.36936	-1.2229	0.00148121	-0.536255	0.012155
1095.12	97.1252	97.3598	59.1399	59.3881	26.0983	26.1672	4.65259	4.3692	-1.23016	0.00148116	-0.528976	0.0121546
1096.12	97.1222	97.3562	59.1477	59.3858	26.1091	26.1662	4.65259	4.36903	-1.22774	0.0014811	-0.531403	0.0121541
1097.12	97.1207	97.3526	59.1472	59.3836	26.1208	26.1653	4.63602	4.36887	-1.23798	0.00148105	-0.543121	0.0121536
1098.12	97.1222	97.349	59.1589	59.3814	26.1355	26.1643	4.63158	4.36871	-1.24243	0.00148099	-0.540314	0.0121532
1099.12	97.1207	97.3453	59.1682	59.3792	26.1252	26.1633	4.61649	4.36855	-1.22736	0.00148093	-0.543671	0.0121527
1100.12	97.1222	97.3417	59.1667	59.377	26.1204	26.1623	4.60181	4.36838	-1.2229	0.00148088	-0.535858	0.0121523
1101.12	97.1012	97.3381	59.176	59.3748	26.1081	26.1614	4.59735	4.36822	-1.20634	0.00148082	-0.543671	0.0121518
1102.12	97.0861	97.3345	59.1669	59.3726	26.113	26.1604	4.59735	4.36806	-1.20782	0.00148077	-0.543671	0.0121514
1103.12	97.0787	97.3308	59.1595	59.3704	26.113	26.1594	4.60461	4.3679	-1.21118	0.00148071	-0.543671	0.0121509
1104.12	97.0817	97.3272	59.1399	59.3682	26.0983	26.1585	4.61391	4.36773	-1.19907	0.00148066	-0.543671	0.0121505
1105.12	97.0832	97.3236	59.1282	59.366	26.1017	26.1575	4.62415	4.36757	-1.19165	0.0014806	-0.543671	0.01215
1106.12	97.0939	97.3199	59.1204	59.3638	26.1212	26.1565	4.64516	4.36741	-1.19165	0.00148055	-0.543121	0.0121496
1107.12	97.1057	97.3163	59.1009	59.3616	26.1281	26.1555	4.6554	4.36724	-1.20337	0.00148049	-0.555389	0.0121491
1108.12	97.1204	97.3127	59.0696	59.3594	26.1373	26.1546	4.64032	4.36708	-1.20392	0.00148044	-0.548126	0.0121487
1109.12	97.1252	97.3091	59.0817	59.3572	26.1359	26.1536	4.62134	4.36692	-1.21118	0.00148038	-0.543671	0.0121482
1110.12	97.1252	97.3054	59.0964	59.355	26.1325	26.1526	4.61688	4.36676	-1.22626	0.00148033	-0.550934	0.0121478
1111.12	97.1295	97.3018	59.0891	59.3528	26.1252	26.1517	4.59735	4.36659	-1.25415	0.00148027	-0.571945	0.0121473
1112.12	97.1222	97.2982	59.0862	59.3506	26.1091	26.1507	4.5929	4.36643	-1.24243	0.00148022	-0.558365	0.0121468
1113.12	97.1207	97.2946	59.0964	59.3484	26.1013	26.1497	4.60907	4.36627	-1.23798	0.00148016	-0.552414	0.0121464
1114.12	97.1295	97.2909	59.1135	59.3462	26.0847	26.1488	4.60907	4.36611	-1.23946	0.00148011	-0.550552	0.0121459
1115.12	97.1179	97.2873	59.1038	59.344	26.0739	26.1478	4.62563	4.36594	-1.23798	0.00148005	-0.560226	0.0121455
1116.12	97.1057	97.2837	59.1009	59.3418	26.0788	26.1468	4.64368	4.36578	-1.23517	0.00148	-0.550552	0.012145
1117.12	97.0891	97.2801	59.0819	59.3396	26.0817	26.1458	4.64087	4.36562	-1.23502	0.00147994	-0.540314	0.0121446
1118.12	97.0789	97.2764	59.0847	59.3374	26.0773	26.1449	4.61165	4.36546	-1.24243	0.00147988	-0.535858	0.0121441
1119.12	97.0696	97.2728	59.0819	59.3352	26.0817	26.1439	4.59438	4.36529	-1.24541	0.00147983	-0.543671	0.0121437
1120.12	97.0471	97.2692	59.0774	59.333	26.0817	26.1429	4.60461	4.36513	-1.23517	0.00147977	-0.555786	0.0121432
1121.12	97.0324	97.2656	59.0847	59.3308	26.1007	26.142	4.59735	4.36497	-1.21078	0.00147972	-0.563202	0.0121428
1122.12	97.0231	97.2619	59.1057	59.3286	26.0934	26.141	4.58954	4.36481	-1.19165	0.00147966	-0.563202	0.0121423
1123.12	97.0084	97.2583	59.1116	59.3264	26.0866	26.14	4.59438	4.36464	-1.17657	0.00147961	-0.575317	0.0121419
1124.12	96.9963	97.2547	59.1087	59.3241	26.0968	26.1391	4.61243	4.36448	-1.16728	0.00147955	-0.589996	0.0121414
1125.12	96.9578	97.2511	59.1009	59.3219	26.0983	26.1381	4.62134	4.36432	-1.14478	0.0014795	-0.574921	0.012141
1126.12	96.9407	97.2475	59.1009	59.3197	26.1085	26.1371	4.60033	4.36415	-1.13789	0.00147944	-0.555389	0.0121405
1127.12	96.907	97.2438	59.1009	59.3175	26.113	26.1361	4.58954	4.36399	-1.1554	0.00147939	-0.555389	0.01214
1128.12	96.8977	97.2402	59.094	59.3153	26.1013	26.1352	4.57056	4.36383	-1.16914	0.00147933	-0.531555	0.0121396
1129.12	96.8947	97.2366	59.0847	59.3131	26.1057	26.1342	4.57336	4.36367	-1.17938	0.00147928	-0.524139	0.0121391
1130.12	96.8797	97.233	59.0886	59.3109	26.0964	26.1332	4.57001	4.3635	-1.18423	0.00147922	-0.535858	0.0121387
1131.12	96.8903	97.2293	59.0744	59.3087	26.1013	26.1323	4.58266	4.36334	-1.19165	0.00147917	-0.535461	0.0121382
1132.12	96.8947	97.2257	59.0769	59.3065	26.094	26.1313	4.59735	4.36318	-1.18439	0.00147911	-0.535858	0.0121378
1133.12	96.8869	97.2221	59.0666	59.3043	26.0847	26.1303	4.61688	4.36302	-1.19165	0.00147906	-0.540695	0.0121373
1134.12	96.8722	97.2185	59.0579	59.3021	26.0934	26.1294	4.63641	4.36285	-1.17953	0.001479	-0.543671	0.0121369
1135.12	96.8707	97.2148	59.0769	59.2999	26.0788	26.1284	4.64383	4.36269	-1.17212	0.00147895	-0.535858	0.0121364
1136.12	96.8868	97.2112	59.0813	59.2977	26.089	26.1274	4.63602	4.36253	-1.16728	0.00147889	-0.524139	0.012136
1137.12	96.9039	97.2076	59.0891	59.2955	26.0983	26.1264	4.64813	4.36237	-1.16431	0.00147884	-0.536255	0.0121355
1138.12	96.9379	97.204	59.1009	59.2933	26.1013	26.1255	4.63158	4.3622	-1.16431	0.00147878	-0.539215	0.0121351
1139.12	96.9766	97.2004	59.1009	59.2911	26.1085	26.1245	4.64032	4.36204	-1.16431	0.00147873	-0.548508	0.0121346
1140.12	97.0006	97.1967	59.1057	59.2889	26.1178	26.1235	4.62134	4.36188	-1.15742	0.00147867	-0.551483	0.0121342
1141.12	96.9846	97.1931	59.0843	59.2867	26.1286	26.1226	4.60907	4.36172	-1.1604	0.00147861	-0.558365	0.0121337
1142.12	96.9699	97.1895	59.0696	59.2845	26.1403	26.1216	4.60907	4.36156	-1.16766	0.00147856	-0.567108	0.0121332
1143.12	96.9606	97.1859	59.0817	59.2823	26.1403	26.1206	4.59735	4.36139	-1.17212	0.0014785	-0.559845	0.0121328
1144.12	96.9451	97.1822	59.0813	59.2801	26.1281	26.1197	4.59735	4.36123	-1.18867	0.00147845	-0.555389	0.0121323
1145.12	96.9139	97.1786	59.0623	59.2779	26.113	26.1187	4.58994	4.36107	-1.21063	0.00147839	-0.558365	0.0121319
1146.12	96.8992	97.175	59.0579	59.2757	26.0983	26.1177	4.60892	4.36091	-1.22736	0.00147834	-0.552414	0.0121314
1147.12	96.9021	97.1714	59.0573	59.2735	26.1041	26.1168	4.6329	4.36074	-1.23071	0.00147828	-0.555389	0.012131
1148.12	96.8943	97.1678	59.0549	59.2713	26.0934	26.1158	4.64032	4.36058	-1.23032	0.00147823	-0.543671	0.0121305
1149.12	96.8826	97.1641	59.0335	59.2691	26.0739	26.1148	4.63586	4.36042	-1.23032	0.00147817	-0.543671	0.0121301
1150.12	96.8631	97.1605	59.0237	59.2669	26.0622	26.1138	4.63344	4.36026	-1.20392	0.00147812	-0.550552	0.0121296
1151.12	96.8557	97.1569	59.0261	59.2647	26.0622	26.1129	4.64072	4.36009	-1.19463	0.00147806	-0.552414	0.0121292
1152.12	96.8479	97.1533	59.0309	59.2625	26.0471	26.1119	4.64813	4.35993	-1.18439	0.00147801	-0.543671	0.0121287
1153.12	96.8361	97.1497	59.0456	59.2603	26.0305	26.1109	4.64813	4.35977	-1.19165	0.00147795	-0.550552	0.0121283
1154.12	96.8332	97.146	59.0618	59.2581	26.0231	26.11	4.63641	4.35961	-1.19165	0.0014779	-0.535858	0.0121278
1155.12	96.8244	97.1424	59.0696	59.2559	26.0309	26.109	4.63586	4.35944	-1.18681	0.00147784	-0.540695	0.0121274
1156.12	96.8121	97.1388	59.0744	59.2537	26.0231	26.108	4.65297	4.35928	-1.19165	0.00147779	-0.543671	0.0121269
1157.12	96.7971	97.1352	59.0891	59.2515	26.028	26.1071	4.6433	4.35912	-1.20337	0.00147773	-0.543274	0.0121265
1158.12	96.7707	97.1316	59.097	59.2493	26.0192	26.1061	4.64032	4.35896	-1.21509	0.00147768	-0.519302	0.012126
1159.12	96.7731	97.1279	59.1038	59.2471	26.0187	26.1051	4.64516	4.35879	-1.20782	0.00147762	-0.516327	0.0121256
1160.12	96.7662	97.1243	59.0936	59.2449	26.0114	26.1042	4.65594	4.35863	-1.19853	0.00147757	-0.521164	0.0121251
1161.12	96.7809	97.1207	59.0891	59.2427	26.007	26.1032	4.66283	4.35847	-1.18829	0.00147751	-0.512421	0.0121246
1162.12	96.7854	97.1171	59.0726	59.2405	26.0159	26.1022	4.64047	4.35831	-1.18384	0.00147746	-0.512421	0.0121242
1163.12	96.7902	97.1135	59.0545	59.2383	26.011	26.1013	4.6286	4.35814	-1.18384	0.0014774	-0.516724	0.0121237
1164.12	96.7932	97.1099	59.0233	59.2361	26.0114	26.1003	4.63641	4.35798	-1.17938	0.00147735	-0.524139	0.0121233
1165.12	96.7932	97.1062	58.9876	59.2339	26.0237	26.0993	4.6286	4.35782	-1.17696	0.00147729	-0.531952	0.0121228
1166.12	96.7854	97.1026	58.9753	59.2317	26.0261	26.0984	4.63586	4.35766	-1.17938	0.00147724	-0.538834	0.0121224
1167.12	96.7736	97.099	58.9602	59.2295	26.0237	26.0974	4.6286	4.3575	-1.18867	0.00147718	-0.516876	0.0121219
1168.12	96.7809	97.0954	58.9413	59.2273	26.0265	26.0964	4.6286	4.35733	-1.20673	0.00147713	-0.512421	0.0121215
1169.12	96.7854	97.0918	58.9368	59.2251	26.028	26.0954	4.63306	4.35717	-1.21118	0.00147707	-0.531403	0.012121
1170.12	96.7775	97.0881	58.929	59.2229	26.0382	26.0945	4.61688	4.35701	-1.21602	0.00147701	-0.535858	0.0121206
1171.12	96.7824	97.0845	58.9362	59.2207	26.0352	26.0935	4.61688	4.35685	-1.23798	0.00147696	-0.540695	0.0121201
1172.12	96.7932	97.0809	58.9169	59.2185	26.0352	26.0925	4.60477	4.35668	-1.25415	0.0014769	-0.539215	0.0121197
1173.12	96.8004	97.0773	58.9095	59.2163	26.0309	26.0916	4.59735	4.35652	-1.25415	0.00147685	-0.555389	0.0121192
1174.12	96.785	97.0737	58.9217	59.2141	26.0235	26.0906	4.58954	4.35636	-1.25415	0.00147679	-0.567108	0.0121188
1175.12	96.7658	97.0701	58.9052	59.2119	26.0313	26.0896	4.5968	4.3562	-1.25415	0.00147674	-0.567108	0.0121183
1176.12	96.758	97.0664	58.9046	59.2097	26.0192	26.0887	4.60126	4.35604	-1.24689	0.00147668	-0.567108	0.0121179
1177.12	96.7463	97.0628	58.9139	59.2075	26.0114	26.0877	4.60609	4.35587	-1.23759	0.00147663	-0.567108	0.0121174
1178.12	96.7385	97.0592	58.9095	59.2053	25.9991	26.0867	4.6286	4.35571	-1.24243	0.00147657	-0.567657	0.012117
1179.12	96.7195	97.0556	58.9052	59.2031	26.0109	26.0858	4.62415	4.35555	-1.22736	0.00147652	-0.563202	0.0121165
1180.12	96.7028	97.052	58.9095	59.2009	26.0081	26.0848	4.6286	4.35539	-1.22588	0.00147646	-0.563202	0.012116
1181.12	96.7072	97.0484	58.9095	59.1987	25.9919	26.0838	4.62079	4.35522	-1.22774	0.00147641	-0.558365	0.0121156
1182.12	96.6834	97.0447	58.9167	59.1966	26.0036	26.0829	4.61353	4.35506	-1.22588	0.00147635	-0.555389	0.0121151
1183.12	96.6609	97.0411	58.9455	59.1944	26.0114	26.0819	4.61688	4.3549	-1.23462	0.0014763	-0.552414	0.0121147
1184.12	96.6369	97.0375	58.9485	59.1922	26.0309	26.0809	4.60461	4.35474	-1.22736	0.00147624	-0.562653	0.0121142
1185.12	96.6325	97.0339	58.9407	59.19	26.0237	26.08	4.60126	4.35458	-1.24243	0.00147619	-0.555389	0.0121138
1186.12	96.6179	97.0303	58.929	59.1878	26.0261	26.079	4.59438	4.35441	-1.24243	0.00147613	-0.543671	0.0121133
1187.12	96.6135	97.0267	58.9245	59.1856	26.0188	26.078	4.5968	4.35425	-1.23759	0.00147608	-0.543671	0.0121129
1188.12	96.6057	97.0231	58.9212	59.1834	26.0114	26.0771	4.58954	4.35409	-1.22736	0.00147602	-0.555389	0.0121124
1189.12	96.6012	97.0194	58.9022	59.1812	26.0231	26.0761	4.57001	4.35393	-1.21078	0.00147597	-0.559845	0.012112
1190.12	96.5984	97.0158	58.8899	59.179	26.028	26.0751	4.57001	4.35376	-1.21118	0.00147591	-0.563202	0.0121115
1191.12	96.5861	97.0122	58.8851	59.1768	26.0382	26.0742	4.57001	4.3536	-1.19125	0.00147586	-0.582733	0.0121111
1192.12	96.5934	97.0086	58.8704	59.1746	26.0548	26.0732	4.55789	4.35344	-1.19165	0.0014758	-0.594849	0.0121106
1193.12	96.5832	97.005	58.8631	59.1724	26.0695	26.0722	4.54321	4.35328	-1.19611	0.00147575	-0.602264	0.0121102
1194.12	96.5787	97.0014	58.8509	59.1702	26.0622	26.0713	4.53392	4.35312	-1.19946	0.00147569	-0.609528	0.0121097
1195.12	96.5817	96.9978	58.8509	59.168	26.0471	26.0703	4.52368	4.35295	-1.20673	0.00147564	-0.606171	0.0121093
1196.12	96.5983	96.9941	58.8391	59.1658	26.0309	26.0693	4.51978	4.35279	-1.20377	0.00147558	-0.586639	0.0121088
1197.12	96.6129	96.9905	58.8313	59.1636	26.0382	26.0683	4.50267	4.35263	-1.21844	0.00147553	-0.563202	0.0121084
1198.12	96.6222	96.9869	58.8391	59.1614	26.0475	26.0674	4.49969	4.35247	-1.21992	0.00147547	-0.555389	0.0121079
1199.12	96.6442	96.9833	58.8391	59.1592	26.0456	26.0664	4.50751	4.35231	-1.23016	0.00147542	-0.535858	0.0121075
1200.12	96.6486	96.9797	58.8391	59.157	26.0349	26.0654	4.51234	4.35214	-1.22774	0.00147536	-0.528976	0.012107
1201.12	96.6492	96.9761	58.8386	59.1548	26.0475	26.0645	4.52258	4.35198	-1.23798	0.00147531	-0.539215	0.0121066
1202.12	96.6248	96.9725	58.8241	59.1526	26.0456	26.0635	4.51923	4.35182	-1.24243	0.00147525	-0.535858	0.0121061
1203.12	96.5984	96.9688	58.8152	59.1504	26.0349	26.0625	4.53134	4.35166	-1.24243	0.0014752	-0.543671	0.0121057
1204.12	96.5744	96.9652	58.8166	59.1482	26.0086	26.0616	4.53876	4.35149	-1.24243	0.00147514	-0.543274	0.0121052
1205.12	96.5579	96.9616	58.82	59.146	25.9997	26.0606	4.52704	4.35133	-1.25415	0.00147509	-0.543274	0.0121047
1206.12	96.5471	96.958	58.8079	59.1438	26.007	26.0596	4.51923	4.35117	-1.24689	0.00147503	-0.536407	0.0121043
1207.12	96.5471	96.9544	58.82	59.1416	26.0114	26.0587	4.51439	4.35101	-1.23759	0.00147498	-0.543671	0.0121038
1208.12	96.5402	96.9508	58.839	59.1394	26.0114	26.0577	4.51625	4.35085	-1.22736	0.00147492	-0.555389	0.0121034
1209.12	96.5382	96.9472	58.8391	59.1372	26.0114	26.0567	4.5343	4.35068	-1.21806	0.00147487	-0.550552	0.0121029
1210.12	96.5441	96.9436	58.8434	59.1351	26.0157	26.0558	4.54359	4.35052	-1.19556	0.00147481	-0.547577	0.0121025
1211.12	96.5471	96.9399	58.8581	59.1329	26.0114	26.0548	4.55869	4.35036	-1.20039	0.00147476	-0.540695	0.012102
1212.12	96.5236	96.9363	58.8557	59.1307	25.9997	26.0538	4.57336	4.3502	-1.21118	0.0014747	-0.539215	0.0121016
1213.12	96.4963	96.9327	58.8659	59.1285	25.9991	26.0529	4.58954	4.35004	-1.21118	0.00147465	-0.540695	0.0121011
1214.12	96.4772	96.9291	58.8631	59.1263	26.0084	26.0519	4.59735	4.34987	-1.2229	0.00147459	-0.543671	0.0121007
1215.12	96.4729	96.9255	58.847	59.1241	26.0192	26.0509	4.59695	4.34971	-1.23798	0.00147454	-0.551483	0.0121002
1216.12	96.4723	96.9219	58.8587	59.1219	26.0265	26.05	4.59399	4.34955	-1.26196	0.00147448	-0.546646	0.0120998
1217.12	96.4846	96.9183	58.847	59.1197	26.0358	26.049	4.59695	4.34939	-1.27814	0.00147443	-0.524292	0.0120993
1218.12	96.4963	96.9147	58.8347	59.1175	26.0505	26.048	4.59695	4.34923	-1.2811	0.00147437	-0.512024	0.0120989
1219.12	96.4963	96.9111	58.8313	59.1153	26.0456	26.0471	4.57742	4.34906	-1.28094	0.00147432	-0.504211	0.0120984
1220.12	96.5086	96.9074	58.8196	59.1131	26.0354	26.0461	4.55829	4.3489	-1.27368	0.00147426	-0.489532	0.012098
1221.12	96.4872	96.9038	58.8001	59.1109	26.0309	26.0451	4.55103	4.34874	-1.25899	0.00147421	-0.48024	0.0120975
1222.12	96.4617	96.9002	58.7805	59.1087	26.0384	26.0442	4.52704	4.34858	-1.25455	0.00147415	-0.470383	0.0120971
1223.12	96.4411	96.8966	58.7854	59.1065	26.0261	26.0432	4.52649	4.34842	-1.24969	0.0014741	-0.468903	0.0120966
1224.12	96.4377	96.893	58.7956	59.1043	26.0086	26.0422	4.51234	4.34825	-1.25455	0.00147404	-0.485474	0.0120962
1225.12	96.4304	96.8894	58.8122	59.1021	26.0066	26.0413	4.51048	4.34809	-1.27408	0.00147399	-0.500153	0.0120957
1226.12	96.426	96.8858	58.8073	59.0999	26.0114	26.0403	4.51923	4.34793	-1.28149	0.00147393	-0.501633	0.0120953
1227.12	96.4143	96.8822	58.8166	59.0977	26.0231	26.0394	4.51923	4.34777	-1.28149	0.00147388	-0.49234	0.0120948
1228.12	96.4264	96.8786	58.8274	59.0956	26.0114	26.0384	4.53094	4.34761	-1.27423	0.00147382	-0.501633	0.0120944
1229.12	96.4528	96.8749	58.8274	59.0934	26.0114	26.0374	4.51923	4.34744	-1.26978	0.00147377	-0.504608	0.0120939
1230.12	96.4621	96.8713	58.8153	59.0912	26.0114	26.0365	4.53094	4.34728	-1.26494	0.00147371	-0.500153	0.0120935
1231.12	96.4533	96.8677	58.8031	59.089	25.9919	26.0355	4.53094	4.34712	-1.2547	0.00147366	-0.496796	0.012093
1232.12	96.4606	96.8641	58.7973	59.0868	25.9768	26.0345	4.52406	4.34696	-1.24969	0.0014736	-0.489914	0.0120926
1233.12	96.4699	96.8605	58.7841	59.0846	25.9558	26.0336	4.50751	4.3468	-1.24243	0.00147355	-0.500153	0.0120921
1234.12	96.468	96.8569	58.7645	59.0824	25.9411	26.0326	4.50751	4.34664	-1.23946	0.00147349	-0.516724	0.0120917
1235.12	96.4529	96.8533	58.7523	59.0802	25.9528	26.0316	4.50751	4.34647	-1.24541	0.00147344	-0.524139	0.0120912
1236.12	96.4304	96.8497	58.7538	59.078	25.9577	26.0307	4.49579	4.34631	-1.25415	0.00147338	-0.536255	0.0120907
1237.12	96.4215	96.8461	58.7567	59.0758	25.9724	26.0297	4.49579	4.34615	-1.25415	0.00147333	-0.562653	0.0120903
1238.12	96.4182	96.8425	58.7489	59.0736	25.9845	26.0287	4.51477	4.34599	-1.2547	0.00147327	-0.579758	0.0120898
1239.12	96.4035	96.8389	58.761	59.0714	25.9991	26.0278	4.51978	4.34583	-1.26978	0.00147322	-0.597427	0.0120894
1240.12	96.3903	96.8353	58.7805	59.0692	26.0157	26.0268	4.52258	4.34566	-1.29361	0.00147316	-0.606323	0.0120889
1241.12	96.38	96.8316	58.785	59.067	26.0187	26.0258	4.53876	4.3455	-1.30829	0.00147311	-0.601868	0.0120885
1242.12	96.3873	96.828	58.7835	59.0648	26.0084	26.0249	4.54321	4.34534	-1.32001	0.00147305	-0.582336	0.012088
1243.12	96.3903	96.8244	58.7733	59.0627	26.007	26.0239	4.53876	4.34518	-1.34883	0.001473	-0.548126	0.0120876
1244.12	96.3947	96.8208	58.7688	59.0605	25.9967	26.0229	4.53392	4.34502	-1.34697	0.00147294	-0.531952	0.0120871
1245.12	96.3947	96.8172	58.7688	59.0583	25.987	26.022	4.54359	4.34485	-1.33673	0.00147289	-0.519684	0.0120867
1246.12	96.3826	96.8136	58.764	59.0561	25.9724	26.021	4.54173	4.34469	-1.3129	0.00147283	-0.508911	0.0120862
1247.12	96.348	96.81	58.7538	59.0539	25.9724	26.02	4.51196	4.34453	-1.28447	0.00147278	-0.516724	0.0120858
1248.12	96.3313	96.8064	58.761	59.0517	25.9772	26.0191	4.50305	4.34437	-1.28595	0.00147272	-0.528442	0.0120853
1249.12	96.3166	96.8028	58.761	59.0495	25.9802	26.0181	4.48798	4.34421	-1.26196	0.00147267	-0.550934	0.0120849
1250.12	96.3166	96.7992	58.7538	59.0473	25.987	26.0171	4.485	4.34405	-1.25024	0.00147261	-0.555389	0.0120844
1251.12	96.3019	96.7956	58.7327	59.0451	25.9768	26.0162	4.47571	4.34388	-1.25024	0.00147256	-0.560226	0.012084
1252.12	96.3121	96.792	58.7298	59.0429	25.9724	26.0152	4.46844	4.34372	-1.25024	0.0014725	-0.582733	0.0120835
1253.12	96.3287	96.7884	58.722	59.0407	25.9606	26.0142	4.47571	4.34356	-1.25455	0.00147245	-0.589615	0.0120831
1254.12	96.341	96.7848	58.7102	59.0385	25.9606	26.0133	4.4729	4.3434	-1.27408	0.00147239	-0.567657	0.0120826
1255.12	96.3512	96.7811	58.722	59.0364	25.9675	26.0123	4.46844	4.34324	-1.2843	0.00147234	-0.574921	0.0120822
1256.12	96.3367	96.7775	58.7102	59.0342	25.9645	26.0113	4.46118	4.34308	-1.30533	0.00147228	-0.594452	0.0120817
1257.12	96.3127	96.7739	58.703	59.032	25.9528	26.0104	4.46399	4.34291	-1.32486	0.00147223	-0.590149	0.0120813
1258.12	96.3049	96.7703	58.7058	59.0298	25.9528	26.0094	4.4679	4.34275	-1.33711	0.00147217	-0.57547	0.0120808
1259.12	96.2805	96.7667	58.7102	59.0276	25.9694	26.0085	4.47719	4.34259	-1.34009	0.00147212	-0.558365	0.0120804
1260.12	96.2463	96.7631	58.6913	59.0254	25.9724	26.0075	4.50009	4.34243	-1.32797	0.00147206	-0.563202	0.0120799
1261.12	96.2268	96.7595	58.6862	59.0232	25.9606	26.0065	4.50751	4.34227	-1.33228	0.00147201	-0.543274	0.0120795
1262.12	96.2268	96.7559	58.679	59.021	25.9441	26.0056	4.52704	4.3421	-1.32016	0.00147195	-0.516327	0.012079
1263.12	96.2195	96.7523	58.6838	59.0188	25.9333	26.0046	4.52664	4.34194	-1.29321	0.0014719	-0.509445	0.0120786
1264.12	96.2102	96.7487	58.6862	59.0166	25.9264	26.0036	4.52704	4.34178	-1.26884	0.00147184	-0.512421	0.0120781
1265.12	96.2	96.7451	58.6712	59.0144	25.9288	26.0027	4.53392	4.34162	-1.26587	0.00147179	-0.512421	0.0120777
1266.12	96.1985	96.7415	58.6477	59.0122	25.9259	26.0017	4.53094	4.34146	-1.24727	0.00147173	-0.519684	0.0120772
1267.12	96.1955	96.7379	58.6399	59.0101	25.9259	26.0007	4.55531	4.3413	-1.25751	0.00147168	-0.524139	0.0120768
1268.12	96.2047	96.7343	58.6472	59.0079	25.9337	25.9998	4.54657	4.34113	-1.26196	0.00147162	-0.535858	0.0120763
1269.12	96.2344	96.7307	58.6516	59.0057	25.9216	25.9988	4.54602	4.34097	-1.27368	0.00147157	-0.528595	0.0120759
1270.12	96.2584	96.7271	58.6371	59.0035	25.9216	25.9978	4.55531	4.34081	-1.29321	0.00147151	-0.519684	0.0120754
1271.12	96.2779	96.7235	58.6355	59.0013	25.9216	25.9969	4.55829	4.34065	-1.30977	0.00147146	-0.528442	0.012075
1272.12	96.2926	96.7199	58.6477	58.9991	25.905	25.9959	4.54617	4.34049	-1.32056	0.0014714	-0.543671	0.0120745
1273.12	96.2898	96.7163	58.6472	58.9969	25.9069	25.9949	4.51439	4.34033	-1.33228	0.00147135	-0.535858	0.0120741
1274.12	96.2736	96.7127	58.6516	58.9947	25.9288	25.994	4.49243	4.34016	-1.32744	0.00147129	-0.524139	0.0120736
1275.12	96.261	96.7091	58.6448	58.9925	25.9333	25.993	4.47586	4.34	-1.3293	0.00147124	-0.516327	0.0120732
1276.12	96.2195	96.7055	58.6599	58.9903	25.9264	25.9921	4.44165	4.33984	-1.33228	0.00147118	-0.516327	0.0120727
1277.12	96.1955	96.7018	58.6745	58.9882	25.9216	25.9911	4.42493	4.33968	-1.32016	0.00147113	-0.509064	0.0120723
1278.12	96.176	96.6982	58.676	58.986	25.9216	25.9901	4.42197	4.33952	-1.30063	0.00147107	-0.492889	0.0120718
1279.12	96.1715	96.6946	58.6862	58.9838	25.9099	25.9892	4.44876	4.33936	-1.28891	0.00147102	-0.500153	0.0120714
1280.12	96.1609	96.691	58.6834	58.9816	25.902	25.9882	4.46587	4.33919	-1.29805	0.00147096	-0.504608	0.0120709
1281.12	96.1326	96.6874	58.6741	58.9794	25.8972	25.9872	4.48837	4.33903	-1.30844	0.00147091	-0.505005	0.0120705
1282.12	96.1325	96.6838	58.6643	58.9772	25.8948	25.9863	4.50305	4.33887	-1.30103	0.00147085	-0.504608	0.01207
1283.12	96.1291	96.6802	58.6673	58.975	25.8903	25.9853	4.51923	4.33871	-1.30829	0.0014708	-0.499771	0.0120696
1284.12	96.1174	96.6766	58.6745	58.9728	25.902	25.9843	4.53876	4.33855	-1.31274	0.00147074	-0.497345	0.0120691
1285.12	96.1105	96.673	58.6717	58.9706	25.902	25.9834	4.55103	4.33839	-1.30063	0.00147069	-0.485626	0.0120687
1286.12	96.1178	96.6694	58.6673	58.9685	25.9099	25.9824	4.55829	4.33823	-1.2811	0.00147063	-0.476334	0.0120682
1287.12	96.1325	96.6658	58.6673	58.9663	25.9093	25.9814	4.55383	4.33806	-1.2547	0.00147058	-0.485077	0.0120678
1288.12	96.13	96.6622	58.6624	58.9641	25.9186	25.9805	4.5704	4.3379	-1.25024	0.00147052	-0.496796	0.0120673
1289.12	96.1403	96.6586	58.6595	58.9619	25.9288	25.9795	4.57782	4.33774	-1.25713	0.00147047	-0.496796	0.0120669
1290.12	96.1496	96.655	58.6595	58.9597	25.9216	25.9786	4.55789	4.33758	-1.24689	0.00147041	-0.473358	0.0120664
1291.12	96.1525	96.6514	58.6522	58.9575	25.9138	25.9776	4.55774	4.33742	-1.26141	0.00147036	-0.478195	0.012066
1292.12	96.152	96.6478	58.6399	58.9553	25.902	25.9766	4.54321	4.33726	-1.27852	0.0014703	-0.480621	0.0120655
1293.12	96.1447	96.6442	58.6282	58.9531	25.902	25.9757	4.52664	4.33709	-1.29321	0.00147025	-0.466095	0.0120651
1294.12	96.1373	96.6406	58.6156	58.9509	25.902	25.9747	4.49539	4.33693	-1.32001	0.00147019	-0.46109	0.0120646
1295.12	96.1252	96.637	58.6126	58.9488	25.8942	25.9737	4.49281	4.33677	-1.32501	0.00147014	-0.472809	0.0120641
1296.12	96.1207	96.6334	58.5936	58.9466	25.8825	25.9728	4.50305	4.33661	-1.33228	0.00147008	-0.477264	0.0120637
1297.12	96.1179	96.6298	58.5964	58.9444	25.887	25.9718	4.50751	4.33645	-1.33916	0.00147003	-0.477264	0.0120632
1298.12	96.0891	96.6262	58.6057	58.9422	25.8903	25.9708	4.50751	4.33629	-1.34399	0.00146997	-0.482101	0.0120628
1299.12	96.0789	96.6226	58.597	58.94	25.9099	25.9699	4.51923	4.33613	-1.34399	0.00146992	-0.485077	0.0120623
1300.12	96.0623	96.619	58.5891	58.9378	25.9095	25.9689	4.51923	4.33596	-1.32947	0.00146986	-0.485474	0.0120619
1301.12	96.0471	96.6154	58.5843	58.9356	25.8977	25.968	4.51883	4.3358	-1.30791	0.00146981	-0.500153	0.0120614
1302.12	96.0232	96.6118	58.5813	58.9334	25.8899	25.967	4.51196	4.33564	-1.30493	0.00146975	-0.516327	0.012061
1303.12	96.0128	96.6082	58.5741	58.9312	25.8825	25.966	4.50711	4.33548	-1.28149	0.0014697	-0.504608	0.0120605
1304.12	95.9996	96.6046	58.5648	58.9291	25.8825	25.9651	4.50751	4.33532	-1.26196	0.00146965	-0.504608	0.0120601
1305.12	95.9967	96.601	58.5696	58.9269	25.8708	25.9641	4.50751	4.33516	-1.24243	0.00146959	-0.516327	0.0120596
1306.12	95.9967	96.5974	58.5862	58.9247	25.8902	25.9631	4.50751	4.33499	-1.25455	0.00146954	-0.509064	0.0120592
1307.12	96.0036	96.5938	58.5774	58.9225	25.9069	25.9622	4.49969	4.33483	-1.27408	0.00146948	-0.488052	0.0120587
1308.12	96.008	96.5902	58.5774	58.9203	25.9216	25.9612	4.48016	4.33467	-1.28094	0.00146943	-0.482101	0.0120583
1309.12	95.9963	96.5866	58.5696	58.9181	25.9216	25.9602	4.47571	4.33451	-1.29805	0.00146937	-0.49234	0.0120578
1310.12	96.0207	96.583	58.5573	58.9159	25.9216	25.9593	4.46063	4.33435	-1.32782	0.00146932	-0.496796	0.0120574
1311.12	96.0232	96.5794	58.5423	58.9138	25.9095	25.9583	4.45375	4.33419	-1.35181	0.00146926	-0.485077	0.0120569
1312.12	96.0236	96.5758	58.5276	58.9116	25.8899	25.9574	4.44891	4.33403	-1.35626	0.00146921	-0.478195	0.0120565
1313.12	96.0354	96.5722	58.5144	58.9094	25.8708	25.9564	4.46399	4.33386	-1.34697	0.00146915	-0.480621	0.012056
1314.12	96.0354	96.5686	58.5231	58.9072	25.8756	25.9554	4.46844	4.3337	-1.33673	0.0014691	-0.470383	0.0120556
1315.12	96.0383	96.565	58.5305	58.905	25.8786	25.9545	4.48016	4.33354	-1.30844	0.00146904	-0.468353	0.0120551
1316.12	96.0281	96.5614	58.5384	58.9028	25.8738	25.9535	4.49243	4.33338	-1.27423	0.00146899	-0.46257	0.0120547
1317.12	96.0037	96.5578	58.5501	58.9006	25.8756	25.9525	4.48758	4.33322	-1.25713	0.00146893	-0.46109	0.0120542
1318.12	95.9846	96.5542	58.5623	58.8984	25.866	25.9516	4.48798	4.33306	-1.25415	0.00146888	-0.465942	0.0120538
1319.12	95.9816	96.5506	58.5726	58.8963	25.8678	25.9506	4.48314	4.3329	-1.24689	0.00146882	-0.477661	0.0120533
1320.12	95.9723	96.547	58.5575	58.8941	25.8591	25.9497	4.49188	4.33273	-1.25024	0.00146877	-0.49234	0.0120529
1321.12	95.9772	96.5434	58.5428	58.8919	25.8663	25.9487	4.49243	4.33257	-1.26196	0.00146871	-0.496796	0.0120524
1322.12	95.9723	96.5399	58.5262	58.8897	25.8513	25.9477	4.49524	4.33241	-1.27666	0.00146866	-0.501633	0.012052
1323.12	95.9621	96.5363	58.5038	58.8875	25.8513	25.9468	4.49243	4.33225	-1.27852	0.0014686	-0.505005	0.0120515
1324.12	95.9918	96.5327	58.4827	58.8853	25.8585	25.9458	4.48071	4.33209	-1.26978	0.00146855	-0.504608	0.0120511
1325.12	95.9725	96.5291	58.4915	58.8831	25.8557	25.9448	4.48798	4.33193	-1.26923	0.00146849	-0.504608	0.0120506
1326.12	95.9572	96.5255	58.4993	58.881	25.8513	25.9439	4.49579	4.33177	-1.27852	0.00146844	-0.512421	0.0120502
1327.12	95.9455	96.5219	58.511	58.8788	25.8434	25.9429	4.50305	4.33161	-1.26978	0.00146838	-0.512421	0.0120497
1328.12	95.9621	96.5183	58.511	58.8766	25.8585	25.942	4.49969	4.33144	-1.26978	0.00146833	-0.524139	0.0120493
1329.12	95.9801	96.5147	58.5305	58.8744	25.8678	25.941	4.49524	4.33128	-1.26923	0.00146827	-0.519302	0.0120488
1330.12	95.9695	96.5111	58.5354	58.8722	25.8708	25.94	4.50453	4.33112	-1.28094	0.00146822	-0.516876	0.0120484
1331.12	95.9485	96.5075	58.5339	58.87	25.866	25.9391	4.48798	4.33096	-1.29024	0.00146816	-0.499771	0.0120479
1332.12	95.926	96.5039	58.5305	58.8678	25.8479	25.9381	4.48016	4.3308	-1.30533	0.00146811	-0.501633	0.0120475
1333.12	95.923	96.5003	58.5188	58.8657	25.8513	25.9371	4.45673	4.33064	-1.32001	0.00146805	-0.504608	0.012047
1334.12	95.9215	96.4967	58.5378	58.8635	25.8509	25.9362	4.45673	4.33048	-1.3293	0.001468	-0.500153	0.0120466
1335.12	95.9189	96.4931	58.5427	58.8613	25.8362	25.9352	4.45618	4.33031	-1.32744	0.00146795	-0.504608	0.0120461
1336.12	95.9454	96.4895	58.5549	58.8591	25.8395	25.9343	4.44165	4.33015	-1.33673	0.00146789	-0.501633	0.0120457
1337.12	95.9576	96.4859	58.5579	58.8569	25.8464	25.9333	4.43236	4.32999	-1.32744	0.00146784	-0.504608	0.0120452
1338.12	95.965	96.4823	58.5579	58.8547	25.8513	25.9323	4.42157	4.32983	-1.30063	0.00146778	-0.507584	0.0120448
1339.12	95.9455	96.4787	58.5579	58.8525	25.863	25.9314	4.41469	4.32967	-1.26642	0.00146773	-0.497345	0.0120444
1340.12	95.9425	96.4751	58.5458	58.8504	25.844	25.9304	4.41711	4.32951	-1.26196	0.00146767	-0.504608	0.0120439
1341.12	95.9221	96.4715	58.5262	58.8482	25.8269	25.9294	4.42641	4.32935	-1.26923	0.00146762	-0.504608	0.0120435
1342.12	95.9143	96.4679	58.5116	58.846	25.8288	25.9285	4.42978	4.32919	-1.26642	0.00146756	-0.504608	0.012043
1343.12	95.902	96.4643	58.495	58.8438	25.8317	25.9275	4.44931	4.32902	-1.26938	0.00146751	-0.511871	0.0120426
1344.12	95.9137	96.4608	58.4876	58.8416	25.8395	25.9266	4.46399	4.32886	-1.29321	0.00146745	-0.516327	0.0120421
1345.12	95.923	96.4572	58.4827	58.8394	25.8395	25.9256	4.46844	4.3287	-1.30063	0.0014674	-0.509445	0.0120417
1346.12	95.926	96.4536	58.472	58.8373	25.8395	25.9246	4.46844	4.32854	-1.30493	0.00146734	-0.499771	0.0120412
1347.12	95.9211	96.45	58.4724	58.8351	25.8468	25.9237	4.46844	4.32838	-1.31758	0.00146729	-0.470001	0.0120408
1348.12	95.926	96.4464	58.4768	58.8329	25.8362	25.9227	4.48798	4.32822	-1.32056	0.00146723	-0.465546	0.0120403
1349.12	95.9066	96.4428	58.4709	58.8307	25.8273	25.9218	4.47586	4.32806	-1.32782	0.00146718	-0.460709	0.0120399
1350.12	95.8992	96.4392	58.472	58.8285	25.8317	25.9208	4.47586	4.3279	-1.33711	0.00146712	-0.45047	0.0120394
1351.12	95.8947	96.4356	58.4841	58.8263	25.8438	25.9198	4.4729	4.32774	-1.34735	0.00146707	-0.446564	0.012039
1352.12	95.902	96.432	58.4963	58.8242	25.8513	25.9189	4.47626	4.32757	-1.35626	0.00146701	-0.453827	0.0120385
1353.12	95.907	96.4284	58.5144	58.822	25.8317	25.9179	4.47142	4.32741	-1.34697	0.00146696	-0.488052	0.0120381
1354.12	95.8947	96.4248	58.511	58.8198	25.8366	25.9169	4.46844	4.32725	-1.35664	0.0014669	-0.48468	0.0120376
1355.12	95.902	96.4212	58.511	58.8176	25.8395	25.916	4.485	4.32709	-1.34697	0.00146685	-0.496796	0.0120372
1356.12	95.8996	96.4176	58.4993	58.8154	25.8347	25.915	4.50696	4.32693	-1.35181	0.0014668	-0.504608	0.0120367
1357.12	95.8899	96.414	58.4993	58.8132	25.8245	25.9141	4.49243	4.32677	-1.36353	0.00146674	-0.509445	0.0120363
1358.12	95.8752	96.4105	58.4915	58.8111	25.8317	25.9131	4.49524	4.32661	-1.36353	0.00146669	-0.511871	0.0120358
1359.12	95.8752	96.4069	58.472	58.8089	25.8395	25.9121	4.48798	4.32645	-1.34399	0.00146663	-0.516724	0.0120354
1360.12	95.8752	96.4033	58.472	58.8067	25.8468	25.9112	4.48071	4.32628	-1.32446	0.00146658	-0.543518	0.0120349
1361.12	95.8748	96.3997	58.4725	58.8045	25.8366	25.9102	4.47571	4.32612	-1.32446	0.00146652	-0.547577	0.0120345
1362.12	95.8679	96.3961	58.4632	58.8023	25.8228	25.9093	4.46844	4.32596	-1.32446	0.00146647	-0.540695	0.012034
1363.12	95.8586	96.3925	58.4647	58.8001	25.8243	25.9083	4.46844	4.3258	-1.31274	0.00146641	-0.539215	0.0120336
1364.12	95.8406	96.3889	58.4364	58.798	25.836	25.9073	4.46844	4.32564	-1.32446	0.00146636	-0.543671	0.0120331
1365.12	95.8244	96.3853	58.4169	58.7958	25.8366	25.9064	4.46118	4.32548	-1.31235	0.0014663	-0.535858	0.0120327
1366.12	95.8049	96.3817	58.3944	58.7936	25.8347	25.9054	4.45189	4.32532	-1.29767	0.00146625	-0.528442	0.0120322
1367.12	95.7926	96.3781	58.3855	58.7914	25.8317	25.9044	4.45337	4.32516	-1.26884	0.00146619	-0.540695	0.0120318
1368.12	95.7824	96.3745	58.3903	58.7892	25.8362	25.9035	4.45633	4.325	-1.25861	0.00146614	-0.543671	0.0120313
1369.12	95.7736	96.3709	58.3903	58.787	25.8274	25.9025	4.44852	4.32483	-1.24203	0.00146608	-0.558365	0.0120309
1370.12	95.7493	96.3674	58.4095	58.7849	25.8122	25.9016	4.43384	4.32467	-1.23462	0.00146603	-0.562805	0.0120304
1371.12	95.7433	96.3638	58.4216	58.7827	25.8074	25.9006	4.42938	4.32451	-1.23462	0.00146597	-0.567657	0.01203
1372.12	95.7584	96.3602	58.4241	58.7805	25.7975	25.8996	4.42493	4.32435	-1.23016	0.00146592	-0.562805	0.0120295
1373.12	95.7614	96.3566	58.4334	58.7783	25.8005	25.8987	4.41766	4.32419	-1.25117	0.00146586	-0.558365	0.0120291
1374.12	95.7658	96.353	58.4364	58.7761	25.8077	25.8977	4.41469	4.32403	-1.25415	0.00146581	-0.560226	0.0120286
1375.12	95.7658	96.3494	58.4413	58.774	25.7927	25.8968	4.42047	4.32387	-1.25415	0.00146576	-0.563202	0.0120282
1376.12	95.7703	96.3458	58.4437	58.7718	25.7975	25.8958	4.44594	4.32371	-1.26196	0.0014657	-0.562653	0.0120277
1377.12	95.7688	96.3422	58.4364	58.7696	25.796	25.8948	4.45673	4.32355	-1.26196	0.00146565	-0.571945	0.0120273
1378.12	95.7703	96.3386	58.4334	58.7674	25.8053	25.8939	4.46844	4.32339	-1.26157	0.00146559	-0.574921	0.0120268
1379.12	95.761	96.335	58.4286	58.7652	25.8077	25.8929	4.48314	4.32322	-1.23462	0.00146554	-0.582733	0.0120264
1380.12	95.7507	96.3315	58.4212	58.763	25.817	25.892	4.47736	4.32306	-1.23462	0.00146548	-0.577896	0.0120259
1381.12	95.7536	96.3279	58.4212	58.7609	25.8351	25.891	4.47142	4.3229	-1.23462	0.00146543	-0.567108	0.0120255
1382.12	95.7511	96.3243	58.4095	58.7587	25.8585	25.89	4.46118	4.32274	-1.2229	0.00146537	-0.574921	0.012025
1383.12	95.7614	96.3207	58.4167	58.7565	25.8674	25.8891	4.45673	4.32258	-1.23462	0.00146532	-0.574524	0.0120246
1384.12	95.758	96.3171	58.4143	58.7543	25.8708	25.8881	4.45618	4.32242	-1.23462	0.00146526	-0.559845	0.0120241
1385.12	95.758	96.3135	58.4099	58.7521	25.8903	25.8872	4.44891	4.32226	-1.23462	0.00146521	-0.523743	0.0120237
1386.12	95.758	96.3099	58.3972	58.75	25.9026	25.8862	4.4415	4.3221	-1.24969	0.00146515	-0.516327	0.0120232
1387.12	95.7507	96.3063	58.3903	58.7478	25.8977	25.8852	4.43665	4.32194	-1.26627	0.0014651	-0.497345	0.0120228
1388.12	95.7493	96.3028	58.3903	58.7456	25.8899	25.8843	4.42938	4.32178	-1.27852	0.00146504	-0.480621	0.0120223
1389.12	95.7342	96.2992	58.3899	58.7434	25.8777	25.8833	4.42641	4.32161	-1.30048	0.00146499	-0.465942	0.0120219
1390.12	95.7385	96.2956	58.3855	58.7412	25.863	25.8823	4.42493	4.32145	-1.31758	0.00146493	-0.492737	0.0120214
1391.12	95.724	96.292	58.3899	58.7391	25.8557	25.8814	4.40985	4.32129	-1.32782	0.00146488	-0.509445	0.012021
1392.12	95.7102	96.2884	58.3944	58.7369	25.8317	25.8804	4.40297	4.32113	-1.32501	0.00146483	-0.516724	0.0120205
1393.12	95.7072	96.2848	58.3851	58.7347	25.82	25.8795	4.41806	4.32097	-1.31572	0.00146477	-0.543518	0.0120201
1394.12	95.6882	96.2812	58.3899	58.7325	25.8126	25.8785	4.42493	4.32081	-1.29767	0.00146472	-0.562653	0.0120196
1395.12	95.6715	96.2776	58.3899	58.7303	25.8273	25.8775	4.40985	4.32065	-1.30048	0.00146466	-0.559845	0.0120192
1396.12	95.6643	96.2741	58.4016	58.7282	25.8317	25.8766	4.40985	4.32049	-1.30493	0.00146461	-0.543671	0.0120188
1397.12	95.6564	96.2705	58.4095	58.726	25.8438	25.8756	4.40985	4.32033	-1.29321	0.00146455	-0.528595	0.0120183
1398.12	95.6564	96.2669	58.426	58.7238	25.8513	25.8747	4.39774	4.32017	-1.2854	0.0014645	-0.527115	0.0120179
1399.12	95.6297	96.2633	58.429	58.7216	25.8708	25.8737	4.3786	4.32001	-1.27368	0.00146444	-0.523743	0.0120174
1400.12	95.6252	96.2597	58.4286	58.7194	25.863	25.8727	4.3786	4.31984	-1.2858	0.00146439	-0.504211	0.012017
1401.12	95.6135	96.2561	58.4217	58.7173	25.8561	25.8718	4.39072	4.31968	-1.29767	0.00146433	-0.489532	0.0120165
1402.12	95.6008	96.2525	58.4241	58.7151	25.8585	25.8708	4.40297	4.31952	-1.29321	0.00146428	-0.504608	0.0120161
1403.12	95.5904	96.2489	58.4139	58.7129	25.8585	25.8699	4.41321	4.31936	-1.32001	0.00146422	-0.512421	0.0120156
1404.12	95.5983	96.2454	58.3929	58.7107	25.8483	25.8689	4.43665	4.3192	-1.33673	0.00146417	-0.512421	0.0120152
1405.12	95.5934	96.2418	58.3899	58.7085	25.8585	25.8679	4.45337	4.31904	-1.34697	0.00146411	-0.512421	0.0120147
1406.12	95.6027	96.2382	58.3899	58.7064	25.8678	25.867	4.42953	4.31888	-1.34454	0.00146406	-0.512421	0.0120143
1407.12	95.5934	96.2346	58.3748	58.7042	25.866	25.866	4.42064	4.31872	-1.34697	0.00146401	-0.524536	0.0120138
1408.12	95.6027	96.231	58.3587	58.702	25.8509	25.8651	4.4104	4.31856	-1.33633	0.00146395	-0.524139	0.0120134
1409.12	95.6008	96.2274	58.3391	58.6998	25.8362	25.8641	4.41283	4.3184	-1.32016	0.0014639	-0.524139	0.0120129
1410.12	95.6027	96.2239	58.3391	58.6976	25.8323	25.8632	4.41431	4.31824	-1.30493	0.00146384	-0.531403	0.0120125
1411.12	95.6057	96.2203	58.327	58.6955	25.8274	25.8622	4.41766	4.31807	-1.30493	0.00146379	-0.535858	0.012012
1412.12	95.6057	96.2167	58.3148	58.6933	25.8269	25.8612	4.42938	4.31791	-1.30493	0.00146373	-0.524139	0.0120116
1413.12	95.6057	96.2131	58.3045	58.6911	25.8245	25.8603	4.43719	4.31775	-1.31705	0.00146368	-0.509064	0.0120111
1414.12	95.6129	96.2095	58.2884	58.6889	25.8395	25.8593	4.45673	4.31759	-1.32001	0.00146362	-0.499771	0.0120107
1415.12	95.6105	96.2059	58.2884	58.6867	25.8587	25.8584	4.44408	4.31743	-1.3293	0.00146357	-0.501633	0.0120102
1416.12	95.6012	96.2023	58.2733	58.6846	25.863	25.8574	4.4411	4.31727	-1.33228	0.00146351	-0.504608	0.0120098
1417.12	95.5793	96.1988	58.2765	58.6824	25.8708	25.8564	4.43422	4.31711	-1.35126	0.00146346	-0.511871	0.0120093
1418.12	95.5817	96.1952	58.2761	58.6802	25.866	25.8555	4.44931	4.31695	-1.36055	0.0014634	-0.540695	0.0120089
1419.12	95.5817	96.1916	58.2927	58.678	25.86	25.8545	4.45673	4.31679	-1.3786	0.00146335	-0.550934	0.0120084
1420.12	95.5789	96.188	58.3044	58.6759	25.8513	25.8536	4.44446	4.31663	-1.40259	0.00146329	-0.555389	0.012008
1421.12	95.5739	96.1844	58.3118	58.6737	25.839	25.8526	4.46063	4.31647	-1.41431	0.00146324	-0.555389	0.0120075
1422.12	95.5979	96.1808	58.3244	58.6715	25.8317	25.8516	4.47275	4.31631	-1.42212	0.00146319	-0.548508	0.0120071
1423.12	95.6105	96.1773	58.3274	58.6693	25.817	25.8507	4.48798	4.31615	-1.40704	0.00146313	-0.546646	0.0120066
1424.12	95.6135	96.1737	58.3269	58.6671	25.8468	25.8497	4.48798	4.31598	-1.39828	0.00146308	-0.535858	0.0120062
1425.12	95.6086	96.1701	58.3196	58.665	25.8513	25.8488	4.49969	4.31582	-1.40259	0.00146302	-0.524139	0.0120057
1426.12	95.6027	96.1665	58.3313	58.6628	25.8557	25.8478	4.49969	4.31566	-1.39775	0.00146297	-0.521164	0.0120053
1427.12	95.5939	96.1629	58.3196	58.6606	25.8464	25.8468	4.50751	4.3155	-1.38751	0.00146291	-0.531952	0.0120049
1428.12	95.5813	96.1593	58.3152	58.6584	25.8245	25.8459	4.50711	4.31534	-1.38361	0.00146286	-0.527115	0.0120044
1429.12	95.5711	96.1558	58.3239	58.6563	25.8152	25.8449	4.51141	4.31518	-1.38603	0.0014628	-0.524139	0.012004
1430.12	95.5428	96.1522	58.3196	58.6541	25.7927	25.844	4.49969	4.31502	-1.37579	0.00146275	-0.524139	0.0120035
1431.12	95.5037	96.1486	58.3244	58.6519	25.7659	25.843	4.48071	4.31486	-1.34697	0.00146269	-0.516876	0.0120031
1432.12	95.489	96.145	58.3079	58.6497	25.7419	25.842	4.48352	4.3147	-1.32446	0.00146264	-0.507584	0.0120026
1433.12	95.4963	96.1414	58.3001	58.6475	25.7345	25.8411	4.4729	4.31454	-1.32446	0.00146258	-0.485077	0.0120022
1434.12	95.4729	96.1379	58.2831	58.6454	25.7302	25.8401	4.46844	4.31438	-1.3172	0.00146253	-0.453827	0.0120017
1435.12	95.4606	96.1343	58.2534	58.6432	25.7302	25.8392	4.45633	4.31422	-1.30103	0.00146248	-0.450851	0.0120013
1436.12	95.4576	96.1307	58.2177	58.641	25.7302	25.8382	4.44891	4.31406	-1.29321	0.00146242	-0.446411	0.0120008
1437.12	95.4772	96.1271	58.1907	58.6388	25.7302	25.8373	4.44461	4.3139	-1.30829	0.00146237	-0.468353	0.0120004
1438.12	95.465	96.1235	58.1907	58.6367	25.7298	25.8363	4.42212	4.31373	-1.31758	0.00146231	-0.465546	0.0119999
1439.12	95.4455	96.1199	58.176	58.6345	25.7346	25.8353	4.42493	4.31357	-1.32056	0.00146226	-0.477264	0.0119995
1440.12	95.4645	96.1164	58.1911	58.6323	25.7497	25.8344	4.42493	4.31341	-1.31274	0.0014622	-0.477814	0.011999
1441.12	95.4617	96.1128	58.213	58.6301	25.7644	25.8334	4.41431	4.31325	-1.31274	0.00146215	-0.473358	0.0119986
1442.12	95.465	96.1092	58.2346	58.628	25.7809	25.8325	4.40985	4.31309	-1.32056	0.00146209	-0.472961	0.0119981
1443.12	95.4768	96.1056	58.2448	58.6258	25.8005	25.8315	4.41711	4.31293	-1.30103	0.00146204	-0.466095	0.0119977
1444.12	95.4846	96.102	58.261	58.6236	25.8122	25.8305	4.43422	4.31277	-1.31274	0.00146198	-0.473358	0.0119972
1445.12	95.5036	96.0985	58.2655	58.6214	25.8122	25.8296	4.42938	4.31261	-1.32056	0.00146193	-0.468521	0.0119968
1446.12	95.5011	96.0949	58.2688	58.6193	25.8122	25.8286	4.43665	4.31245	-1.33228	0.00146188	-0.465546	0.0119963
1447.12	95.5036	96.0913	58.2805	58.6171	25.8005	25.8277	4.4415	4.31229	-1.34439	0.00146182	-0.485077	0.0119959
1448.12	95.5011	96.0877	58.2688	58.6149	25.7927	25.8267	4.43422	4.31213	-1.35181	0.00146177	-0.477264	0.0119954
1449.12	95.4963	96.0841	58.2688	58.6127	25.7688	25.8258	4.42493	4.31197	-1.37415	0.00146171	-0.470001	0.011995
1450.12	95.4918	96.0806	58.261	58.6106	25.7542	25.8248	4.41469	4.31181	-1.39478	0.00146166	-0.460709	0.0119945
1451.12	95.4963	96.077	58.2448	58.6084	25.7497	25.8238	4.43219	4.31165	-1.38751	0.0014616	-0.470383	0.0119941
1452.12	95.4963	96.0734	58.2463	58.6062	25.7376	25.8229	4.42938	4.31149	-1.3786	0.00146155	-0.480621	0.0119937
1453.12	95.489	96.0698	58.2253	58.604	25.7298	25.8219	4.42938	4.31133	-1.37524	0.00146149	-0.477264	0.0119932
1454.12	95.465	96.0662	58.2268	58.6018	25.7298	25.821	4.43384	4.31116	-1.38789	0.00146144	-0.48938	0.0119928
1455.12	95.4602	96.0627	58.2253	58.5997	25.7102	25.82	4.42993	4.311	-1.37822	0.00146138	-0.523987	0.0119923
1456.12	95.4377	96.0591	58.2346	58.5975	25.7145	25.819	4.43236	4.31084	-1.37524	0.00146133	-0.547974	0.0119919
1457.12	95.4304	96.0555	58.2493	58.5953	25.7145	25.8181	4.41727	4.31068	-1.35626	0.00146128	-0.560226	0.0119914
1458.12	95.4143	96.0519	58.2445	58.5931	25.7077	25.8171	4.42212	4.31052	-1.35181	0.00146122	-0.582184	0.011991
1459.12	95.4021	96.0483	58.2342	58.591	25.7062	25.8162	4.41283	4.31036	-1.36353	0.00146117	-0.594452	0.0119905
1460.12	95.3825	96.0448	58.2132	58.5888	25.7149	25.8152	4.41431	4.3102	-1.36353	0.00146111	-0.598907	0.0119901
1461.12	95.3791	96.0412	58.1981	58.5866	25.7345	25.8143	4.41283	4.31004	-1.35626	0.00146106	-0.590149	0.0119896
1462.12	95.3605	96.0376	58.1907	58.5844	25.754	25.8133	4.41431	4.30988	-1.35478	0.001461	-0.582336	0.0119892
1463.12	95.3629	96.034	58.1712	58.5823	25.7614	25.8123	4.41727	4.30972	-1.36353	0.00146095	-0.570618	0.0119887
1464.12	95.3605	96.0305	58.1638	58.5801	25.7809	25.8114	4.4104	4.30956	-1.37579	0.00146089	-0.555939	0.0119883
1465.12	95.3557	96.0269	58.176	58.5779	25.7956	25.8104	4.41283	4.3094	-1.38306	0.00146084	-0.543671	0.0119878
1466.12	95.3586	96.0233	58.1911	58.5758	25.7854	25.8095	4.40259	4.30924	-1.37094	0.00146078	-0.531952	0.0119874
1467.12	95.3484	96.0197	58.2058	58.5736	25.7731	25.8085	4.41711	4.30908	-1.35869	0.00146073	-0.531403	0.0119869
1468.12	95.3391	96.0161	58.1985	58.5714	25.7683	25.8076	4.40985	4.30892	-1.35571	0.00146068	-0.528976	0.0119865
1469.12	95.3289	96.0126	58.2224	58.5692	25.7463	25.8066	4.41469	4.30876	-1.32446	0.00146062	-0.519684	0.011986
1470.12	95.3172	96.009	58.2298	58.5671	25.7491	25.8056	4.41321	4.3086	-1.32446	0.00146057	-0.511871	0.0119856
1471.12	95.3317	96.0054	58.2327	58.5649	25.7584	25.8047	4.40985	4.30844	-1.32446	0.00146051	-0.501633	0.0119851
1472.12	95.3512	96.0018	58.222	58.5627	25.7566	25.8037	4.40297	4.30828	-1.33228	0.00146046	-0.511871	0.0119847
1473.12	95.3406	95.9983	58.2268	58.5605	25.7653	25.8028	4.3933	4.30811	-1.35611	0.0014604	-0.497345	0.0119843
1474.12	95.3434	95.9947	58.237	58.5584	25.7659	25.8018	4.3786	4.30795	-1.37564	0.00146035	-0.49234	0.0119838
1475.12	95.3406	95.9911	58.2298	58.5562	25.7737	25.8009	4.3786	4.30779	-1.38789	0.00146029	-0.489914	0.0119834
1476.12	95.3317	95.9875	58.2268	58.554	25.7644	25.7999	4.39032	4.30763	-1.38641	0.00146024	-0.511871	0.0119829
1477.12	95.3166	95.984	58.2302	58.5518	25.761	25.7989	4.3786	4.30747	-1.39813	0.00146018	-0.536255	0.0119825
1478.12	95.2854	95.9804	58.2566	58.5497	25.7536	25.798	4.38344	4.30731	-1.40689	0.00146013	-0.536407	0.011982
1479.12	95.2897	95.9768	58.2805	58.5475	25.7493	25.797	4.39813	4.30715	-1.39532	0.00146008	-0.539215	0.0119816
1480.12	95.2824	95.9732	58.2684	58.5453	25.7268	25.7961	4.4054	4.30699	-1.37094	0.00146002	-0.543671	0.0119811
1481.12	95.2779	95.9697	58.2567	58.5431	25.7224	25.7951	4.41766	4.30683	-1.35141	0.00145997	-0.548126	0.0119807
1482.12	95.2658	95.9661	58.2416	58.541	25.7224	25.7942	4.40555	4.30667	-1.33228	0.00145991	-0.538834	0.0119802
1483.12	95.2614	95.9625	58.2104	58.5388	25.7106	25.7932	4.40985	4.30651	-1.32501	0.00145986	-0.524139	0.0119798
1484.12	95.2658	95.9589	58.1942	58.5366	25.7179	25.7922	4.39087	4.30635	-1.30791	0.0014598	-0.516327	0.0119793
1485.12	95.2541	95.9554	58.179	58.5345	25.7194	25.7913	4.38158	4.30619	-1.30977	0.00145975	-0.504608	0.0119789
1486.12	95.2658	95.9518	58.1595	58.5323	25.7296	25.7903	4.36353	4.30603	-1.30829	0.00145969	-0.504608	0.0119784
1487.12	95.2658	95.9482	58.155	58.5301	25.7341	25.7894	4.34735	4.30587	-1.32486	0.00145964	-0.501633	0.011978
1488.12	95.2658	95.9446	58.1595	58.5279	25.7341	25.7884	4.3468	4.30571	-1.33173	0.00145959	-0.499771	0.0119775
1489.12	95.2658	95.9411	58.1595	58.5258	25.7341	25.7875	4.33954	4.30555	-1.32486	0.00145953	-0.496796	0.0119771
1490.12	95.2589	95.9375	58.1522	58.5236	25.7341	25.7865	4.35126	4.30539	-1.33711	0.00145948	-0.497345	0.0119767
1491.12	95.2619	95.9339	58.1429	58.5214	25.7272	25.7855	4.35609	4.30523	-1.34439	0.00145942	-0.492493	0.0119762
1492.12	95.2614	95.9303	58.1444	58.5192	25.7224	25.7846	4.37119	4.30507	-1.35181	0.00145937	-0.480774	0.0119758
1493.12	95.2658	95.9268	58.1351	58.5171	25.7062	25.7836	4.38626	4.30491	-1.35181	0.00145931	-0.461243	0.0119753
1494.12	95.2468	95.9232	58.1176	58.5149	25.6959	25.7827	4.41025	4.30475	-1.34735	0.00145926	-0.465546	0.0119749
1495.12	95.2424	95.9196	58.0921	58.5127	25.6984	25.7817	4.4054	4.30459	-1.35181	0.0014592	-0.466095	0.0119744
1496.12	95.2297	95.916	58.0744	58.5106	25.6984	25.7808	4.41469	4.30443	-1.36836	0.00145915	-0.461639	0.011974
1497.12	95.2195	95.9125	58.0769	58.5084	25.7028	25.7798	4.41766	4.30427	-1.37431	0.00145909	-0.461639	0.0119735
1498.12	95.2033	95.9089	58.07	58.5062	25.6956	25.7788	4.40594	4.30411	-1.38306	0.00145904	-0.480621	0.0119731
1499.12	95.2028	95.9053	58.0817	58.504	25.7028	25.7779	4.39813	4.30394	-1.41431	0.00145899	-0.485077	0.0119726
1500.12	95.2149	95.9018	58.089	58.5019	25.7034	25.7769	4.38641	4.30378	-1.42657	0.00145893	-0.465546	0.0119722
1501.12	95.2311	95.8982	58.1013	58.4997	25.6941	25.776	4.37415	4.30362	-1.43681	0.00145888	-0.465546	0.0119717
1502.12	95.2316	95.8946	58.1009	58.4975	25.6956	25.775	4.36391	4.30346	-1.44611	0.00145882	-0.485474	0.0119713
1503.12	95.2422	95.891	58.1009	58.4954	25.6863	25.7741	4.35461	4.3033	-1.45337	0.00145877	-0.500153	0.0119708
1504.12	95.2536	95.8875	58.1081	58.4932	25.6838	25.7731	4.35947	4.30314	-1.45337	0.00145871	-0.496796	0.0119704
1505.12	95.2511	95.8839	58.1174	58.491	25.6716	25.7722	4.36688	4.30298	-1.44891	0.00145866	-0.497192	0.0119699
1506.12	95.2536	95.8803	58.1156	58.4888	25.6866	25.7712	4.3786	4.30282	-1.43867	0.0014586	-0.501633	0.0119695
1507.12	95.2463	95.8767	58.1131	58.4867	25.7028	25.7702	4.3786	4.30266	-1.42993	0.00145855	-0.500153	0.0119691
1508.12	95.2385	95.8732	58.1087	58.4845	25.7224	25.7693	4.38158	4.3025	-1.42252	0.0014585	-0.496796	0.0119686
1509.12	95.2312	95.8696	58.0936	58.4823	25.7073	25.7683	4.38306	4.30234	-1.42938	0.00145844	-0.501633	0.0119682
1510.12	95.2225	95.866	58.0579	58.4802	25.7028	25.7674	4.38602	4.30218	-1.42212	0.00145839	-0.499771	0.0119677
1511.12	95.2	95.8625	58.0534	58.478	25.6907	25.7664	4.38306	4.30202	-1.41486	0.00145833	-0.489532	0.0119673
1512.12	95.179	95.8589	58.0573	58.4758	25.6595	25.7655	4.38158	4.30186	-1.40556	0.00145828	-0.492889	0.0119668
1513.12	95.1643	95.8553	58.0549	58.4736	25.6403	25.7645	4.38306	4.3017	-1.40259	0.00145822	-0.504608	0.0119664
1514.12	95.149	95.8517	58.0456	58.4715	25.6135	25.7635	4.37376	4.30154	-1.39532	0.00145817	-0.524139	0.0119659
1515.12	95.1446	95.8482	58.0501	58.4693	25.5968	25.7626	4.36353	4.30138	-1.3665	0.00145811	-0.524139	0.0119655
1516.12	95.1608	95.8446	58.0744	58.4671	25.5817	25.7616	4.34251	4.30122	-1.34883	0.00145806	-0.519302	0.011965
1517.12	95.1496	95.841	58.0726	58.465	25.5748	25.7607	4.33954	4.30106	-1.33954	0.00145801	-0.509064	0.0119646
1518.12	95.152	95.8375	58.0813	58.4628	25.5851	25.7597	4.32446	4.3009	-1.33711	0.00145795	-0.499771	0.0119641
1519.12	95.1564	95.8339	58.0741	58.4606	25.6013	25.7588	4.31555	4.30074	-1.34735	0.0014579	-0.496796	0.0119637
1520.12	95.1564	95.8303	58.0696	58.4585	25.6208	25.7578	4.32484	4.30058	-1.36353	0.00145784	-0.477814	0.0119632
1521.12	95.1447	95.8268	58.0579	58.4563	25.6252	25.7569	4.33939	4.30042	-1.37094	0.00145779	-0.466095	0.0119628
1522.12	95.1252	95.8232	58.0579	58.4541	25.6359	25.7559	4.37119	4.30026	-1.35922	0.00145773	-0.453827	0.0119624
1523.12	95.1178	95.8196	58.0501	58.4519	25.6403	25.7549	4.3786	4.3001	-1.35626	0.00145768	-0.468903	0.0119619
1524.12	95.1057	95.816	58.0305	58.4498	25.6446	25.754	4.39072	4.29994	-1.35922	0.00145762	-0.497345	0.0119615
1525.12	95.1012	95.8125	58.0071	58.4476	25.652	25.753	4.39813	4.29978	-1.34697	0.00145757	-0.492493	0.011961
1526.12	95.1027	95.8089	57.9993	58.4454	25.6476	25.7521	4.40985	4.29962	-1.32892	0.00145752	-0.48024	0.0119606
1527.12	95.0939	95.8053	57.9948	58.4433	25.6491	25.7511	4.39087	4.29946	-1.32001	0.00145746	-0.485077	0.0119601
1528.12	95.0939	95.8018	57.9963	58.4411	25.6599	25.7502	4.3743	4.2993	-1.3483	0.00145741	-0.496796	0.0119597
1529.12	95.0744	95.7982	57.9993	58.4389	25.6671	25.7492	4.36688	4.29914	-1.35626	0.00145735	-0.496796	0.0119592
1530.12	95.0865	95.7946	58.0066	58.4368	25.6565	25.7483	4.36205	4.29898	-1.35181	0.0014573	-0.496796	0.0119588
1531.12	95.1055	95.7911	57.9993	58.4346	25.6476	25.7473	4.35181	4.29882	-1.35181	0.00145724	-0.501633	0.0119583
1532.12	95.1368	95.7875	57.9963	58.4324	25.6645	25.7463	4.35461	4.29866	-1.35907	0.00145719	-0.531403	0.0119579
1533.12	95.1535	95.7839	57.9827	58.4303	25.6788	25.7454	4.37079	4.2985	-1.36353	0.00145714	-0.536407	0.0119574
1534.12	95.1447	95.7804	57.972	58.4281	25.6686	25.7444	4.3786	4.29834	-1.36055	0.00145708	-0.527115	0.011957
1535.12	95.1564	95.7768	57.9481	58.4259	25.6716	25.7435	4.3786	4.29818	-1.36392	0.00145703	-0.504211	0.0119566
1536.12	95.1322	95.7732	57.9407	58.4237	25.6671	25.7425	4.3786	4.29802	-1.35907	0.00145697	-0.496796	0.0119561
1537.12	95.1053	95.7696	57.9524	58.4216	25.6716	25.7416	4.3786	4.29786	-1.36353	0.00145692	-0.489532	0.0119557
1538.12	95.0861	95.7661	57.9651	58.4194	25.6595	25.7406	4.3786	4.2977	-1.35181	0.00145686	-0.468521	0.0119552
1539.12	95.0861	95.7625	57.9753	58.4172	25.652	25.7397	4.35907	4.29754	-1.34454	0.00145681	-0.465546	0.0119548
1540.12	95.0861	95.7589	57.9963	58.4151	25.6686	25.7387	4.35126	4.29738	-1.33485	0.00145675	-0.465546	0.0119543
1541.12	95.0744	95.7554	58.0138	58.4129	25.6667	25.7378	4.35126	4.29722	-1.30508	0.0014567	-0.477661	0.0119539
1542.12	95.0672	95.7518	58.0159	58.4107	25.6716	25.7368	4.35907	4.29706	-1.28891	0.00145665	-0.485077	0.0119534
1543.12	95.0744	95.7482	58.014	58.4086	25.676	25.7358	4.37079	4.2969	-1.28633	0.00145659	-0.489914	0.011953
1544.12	95.0623	95.7447	57.9915	58.4064	25.6667	25.7349	4.38306	4.29674	-1.30829	0.00145654	-0.492889	0.0119525
1545.12	95.0618	95.7411	57.9963	58.4042	25.6643	25.7339	4.38641	4.29658	-1.34439	0.00145648	-0.500153	0.0119521
1546.12	95.0593	95.7375	57.9948	58.4021	25.6643	25.733	4.4054	4.29642	-1.39517	0.00145643	-0.504608	0.0119516
1547.12	95.0471	95.734	58.0041	58.3999	25.655	25.732	4.41766	4.29626	-1.42252	0.00145637	-0.497345	0.0119512
1548.12	95.0354	95.7304	57.9948	58.3977	25.6448	25.7311	4.40985	4.2961	-1.45673	0.00145632	-0.492889	0.0119507
1549.12	95.0158	95.7268	57.9963	58.3956	25.6355	25.7301	4.39516	4.29594	-1.44907	0.00145627	-0.492889	0.0119503
1550.12	95.0036	95.7233	57.9876	58.3934	25.6325	25.7292	4.41751	4.29578	-1.42172	0.00145621	-0.49234	0.0119499
1551.12	94.9889	95.7197	57.9827	58.3912	25.6325	25.7282	4.42978	4.29562	-1.38751	0.00145616	-0.489532	0.0119494
1552.12	94.9933	95.7161	57.9725	58.3891	25.637	25.7273	4.4415	4.29546	-1.34399	0.0014561	-0.492737	0.011949
1553.12	94.9993	95.7126	57.9632	58.3869	25.6476	25.7263	4.43665	4.2953	-1.32782	0.00145605	-0.509293	0.0119485
1554.12	95.008	95.709	57.953	58.3847	25.652	25.7253	4.42938	4.29514	-1.30977	0.00145599	-0.516724	0.0119481
1555.12	95.0086	95.7054	57.9602	58.3826	25.6642	25.7244	4.41766	4.29498	-1.3204	0.00145594	-0.531952	0.0119476
1556.12	94.9993	95.7019	57.9485	58.3804	25.6565	25.7234	4.38602	4.29482	-1.34439	0.00145588	-0.536255	0.0119472
1557.12	95.0007	95.6983	57.948	58.3782	25.6403	25.7225	4.34695	4.29466	-1.36353	0.00145583	-0.539215	0.0119467
1558.12	94.9773	95.6948	57.9455	58.3761	25.6286	25.7215	4.34438	4.2945	-1.38306	0.00145578	-0.543671	0.0119463
1559.12	94.965	95.6912	57.9528	58.3739	25.616	25.7206	4.34735	4.29434	-1.39532	0.00145572	-0.543274	0.0119458
1560.12	94.9533	95.6876	57.9606	58.3717	25.6013	25.7196	4.34735	4.29418	-1.40556	0.00145567	-0.536407	0.0119454
1561.12	94.9483	95.6841	57.9636	58.3696	25.5983	25.7187	4.34735	4.29402	-1.42212	0.00145561	-0.531952	0.011945
1562.12	94.9498	95.6805	57.9675	58.3674	25.6085	25.7177	4.34735	4.29386	-1.41486	0.00145556	-0.538834	0.0119445
1563.12	94.9621	95.6769	57.9915	58.3652	25.6251	25.7168	4.35907	4.2937	-1.42212	0.0014555	-0.535858	0.0119441
1564.12	94.9606	95.6734	57.9887	58.3631	25.6208	25.7158	4.34695	4.29354	-1.41728	0.00145545	-0.535858	0.0119436
1565.12	94.9578	95.6698	57.9706	58.3609	25.6134	25.7148	4.33954	4.29338	-1.40259	0.0014554	-0.540695	0.0119432
1566.12	94.9455	95.6662	57.9556	58.3587	25.6281	25.7139	4.33228	4.29322	-1.39961	0.00145534	-0.550934	0.0119427
1567.12	94.9334	95.6627	57.9213	58.3566	25.6295	25.7129	4.3308	4.29306	-1.4104	0.00145529	-0.543671	0.0119423
1568.12	94.9094	95.6591	57.9091	58.3544	25.6398	25.712	4.34438	4.2929	-1.4104	0.00145523	-0.540695	0.0119418
1569.12	94.8986	95.6555	57.8944	58.3522	25.6448	25.711	4.37415	4.29274	-1.40259	0.00145518	-0.550934	0.0119414
1570.12	94.9035	95.652	57.8899	58.3501	25.6355	25.7101	4.37134	4.29258	-1.39813	0.00145512	-0.560226	0.0119409
1571.12	94.902	95.6484	57.8972	58.3479	25.6252	25.7091	4.3786	4.29242	-1.38751	0.00145507	-0.571014	0.0119405
1572.12	94.9113	95.6449	57.9138	58.3457	25.6208	25.7082	4.38586	4.29226	-1.37134	0.00145502	-0.570465	0.01194
1573.12	94.9186	95.6413	57.9333	58.3436	25.6355	25.7072	4.36688	4.2921	-1.3665	0.00145496	-0.574921	0.0119396
1574.12	94.9332	95.6377	57.929	58.3414	25.6252	25.7063	4.36688	4.29194	-1.35181	0.00145491	-0.567657	0.0119392
1575.12	94.9304	95.6342	57.9411	58.3392	25.6281	25.7053	4.35962	4.29178	-1.36836	0.00145485	-0.563202	0.0119387
1576.12	94.9143	95.6306	57.929	58.3371	25.6373	25.7044	4.35516	4.29162	-1.38306	0.0014548	-0.551483	0.0119383
1577.12	94.883	95.627	57.9333	58.3349	25.6476	25.7034	4.35033	4.29146	-1.39087	0.00145474	-0.543671	0.0119378
1578.12	94.8825	95.6235	57.929	58.3327	25.6686	25.7024	4.34735	4.2913	-1.39775	0.00145469	-0.543671	0.0119374
1579.12	94.8869	95.6199	57.9407	58.3306	25.6599	25.7015	4.34735	4.29114	-1.41431	0.00145464	-0.550934	0.0119369
[truncated: 1,421 more rows]

## Sheet: K417N
Times	50 nM	50 nM-Fit	20 nM	20 nM-Fit	10 nM	10 nM-Fit	5 nM	5 nM-Fit	2 nM	2 nM-Fit	1 nM	1 nM-Fit
[truncated: 3,062 more rows]

[truncated: 2 more sheets: E484K, Triple]
