# Supplementary material for: N501Y mutation of spike protein in SARS-CoV-2 strengthens its binding to receptor ACE2
Source: eLife. 2021 Aug 20;10:e69091. doi: 10.7554/eLife.69091 (PMC8455130; doi:10.7554/eLife.69091)
Supplement: Figure 3—source data 1. [file elife-69091-fig3-data1.xlsx]

## Sheet: Figure 3C
Force Histogram (pN)-5 μm/s
RBD	RBDN501Y	RBDTriple
59.0906	96.399	51.9969
45.0681	88.6315	50.7636
39.1057	87.1721	79.2096
44.5771	85.4109	47.0492
46.1365	84.9341	38.4967
47.2609	83.8989	51.9996
56.0448	83.2898	60.5406
61.2687	81.2177	41.0717
52.7623	80.528	45.3371
57.8054	80.4704	45.5966
52.6733	79.395	51.9674
42.7116	78.8157	49.6421
50.2952	77.8082	50.4689
51.8464	77.7293	44.4812
61.0345	77.5836	42.5303
53.364	77.0563	46.8246
58.8855	76.4775	75.5761
37.0398	76.3404	52.4358
61.2972	76.3162	64.2621
58.2323	76.2906	56.6858
45.0598	76.1022	51.5652
41.1266	75.82	60.6273
45.3605	74.6684	32.9555
52.6893	74.1686	58.7499
51.1596	73.9111	78.1012
57.8665	73.7471	49.1645
68.7985	73.4443	51.1248
42.4418	73.1171	57.7998
43.4907	73.0321	47.2557
38.9034	72.9736	45.5683
55.6044	72.9736	43.1582
49.5482	72.6662	52.9259
41.7686	72.6114	42.7322
71.8862	72.495	45.6182
56.4186	72.4266	69.8447
43.8216	72.2731	60.5977
69.9386	72.257	46.4478
49.687	72.0046	67.0145
51.0453	71.5243	47.5087
61.3119	71.1916	64.2774
69.3995	71.042	53.1504
59.2989	70.215	50.474
67.82	70.088	47.3504
69.8703	69.8258	53.4805
48.4027	69.803	62.4923
65.7828	69.1302	60.5088
49.8006	68.9539	46.4465
53.4458	68.8815	74.962
62.4437	68.7267	50.5617
79.539	68.7218	63.662
71.843	68.6081	40.5014
78.9524	68.5416	64.2464
61.5923	68.4867	56.5504
57.3939	68.4221	58.662
60.1162	68.0867	52.4714
66.9698	67.8077	56.665
56.5065	67.3302	40.7199
64.642	67.1175	50.4967
63.2367	66.9687	49.2609
50.4672	66.962	65.2919
52.6272	66.9619	48.3669
68.3337	66.7289	53.1073
52.3733	66.7251	48.4442
56.8511	66.5005	62.6322
76.7975	66.306	57.8913
69.2249	66.1757	50.9346
65.1535	66.0213	55.1368
75.6471	65.9985	62.9062
54.7724	65.4567	57.8985
63.8203	65.4464	44.1342
46.8514	65.18	54.6463
57.0171	65.165	55.2421
43.38	65.146	57.1154
70.1701	65.0846	48.4349
68.6119	64.885	37.855
62.6054	64.7934	53.6307
90.7101	64.7658	45.3205
57.5232	64.7554	60.8675
63.46	64.6859	50.9999
44.3631	64.587	79.5126
64.6535	64.4824	53.7825
58.7283	64.4098	52.0632
81.0948	64.3711	55.622
69.5548	64.2754	33.8513
66.3463	63.9413	52.4118
61.2355	63.8628	52.8089
54.9366	63.8006	51.0312
63.3626	63.6	48.964
50.8853	63.3587	60.112
55.4391	63.2925	67.8516
52.2233	63.2645	60.2215
70.5105	63.2626	59.9055
64.398	63.137	59.8058
66.3518	63.1019	52.3292
52.0154	63.0509	49.2912
49.8154	62.9785	51.6006
60.4345	62.9253	32.2956
65.8283	62.877	49.1253
61.7665	62.7746	54.7662
61.2858	62.622	55.4957
56.1433	62.4328	49.1145
59.5539	62.331	64.9085
47.2601	62.2407	74.4899
58.9743	62.105	41.2991
55.7567	61.9612	48.4635
58.0694	61.7698	45.3618
67.5198	61.4928	61.0151
66.5665	61.2086	56.0871
56.1834	61.1718	42.2709
51.9721	61.149	51.4396
60.6079	60.8667	55.0019
50.2609	60.8458	71.4815
61.5818	60.8389	54.7441
47.678	60.7399	43.1438
64.4504	60.693	52.9594
52.3305	60.671	56.4794
58.8004	60.6253	60.7212
53.8251	60.577	48.5184
64.2563	60.5294	55.2126
58.5433	60.4411	53.4193
56.3365	60.4033	70.7998
62.9734	60.4032	46.7818
51.1143	60.2261	52.9909
50.53	60.103	43.1449
50.4847	60.0196	43.8493
46.7206	59.971	57.7141
56.1691	59.9668	69.6616
67.4649	59.9602	55.6895
67.7015	59.8982	69.187
72.4253	59.882	61.0914
65.923	59.8553	49.9079
48.4052	59.7317	70.5956
36.7271	59.7277	60.6335
33.1103	59.6759	47.5207
29.4172	59.6713	77.8467
40.0938	59.6103	72.1417
41.6793	59.5828	72.914
40.593	59.4805	39.4416
40.7042	59.441	47.7399
36.1888	59.405	72.4511
35.1677	59.3761	53.5041
41.5029	59.3517	41.5936
45.6171	59.2784	72.8758
44.1955	59.2778	46.6218
51.2279	59.2736	49.0841
46.7081	59.215	40.19
48.6792	59.1036	41.8046
36.8417	59	74.3236
37.957	58.9719	50.3665
35.1291	58.948	48.7364
48.2205	58.9246	56.1331
34.7611	58.7813	57.4415
51.8699	58.5846	55.4836
43.0212	58.5626	36.1923
39.3678	58.494	64.9378
52.6651	58.454	46.0019
46.5979	58.233	44.8791
53.567	58.1818	52.1674
48.0643	58.0616	66.5658
43.5394	58.0516	51.9681
39.155	57.9636	47.5649
41.037	57.9166	66.7757
36.7315	57.8268	43.8104
43.5158	57.8131	44.9253
39.0999	57.7168	75.2278
60.2129	57.625	62.4232
44.7942	57.6204	46.2128
64.891	57.5951	53.7362
63.8588	57.5761	47.2197
39.6439	57.5069	63.6698
53.3421	57.3787	52.2392
35.9285	57.3476	73.9751
36.755	57.2396	66.9079
47.8813	57.0421	53.713
36.8766	56.988	64.9646
53.2066	56.9657	34.6373
33.8305	56.925	43.0751
50.6188	56.9216	50.5246
44.1619	56.8877	43.4704
47.8154	56.8492	58.8331
48.446	56.7382	42.7956
42.6625	56.7272	53.457
51.113	56.7126	72.0099
43.2775	56.7042	52.7489
44.0201	56.6699	48.0218
45.6651	56.5307	51.4505
44.2624	56.3915	65.5166
51.9672	56.3622	63.9939
33.5497	56.3477	54.0477
35.9608	56.333	66.9668
52.9671	56.1908	66.5803
46.9823	56.18	80.6543
44.1508	56.1425	59.2446
44.378	56.0815	48.472
43.4141	55.8026	44.5564
44.6918	55.7412	46.5551
49.4	55.679	51.3899
46.3132	55.6765	69.0753
40.6697	55.6548	60.6741
34.9947	55.632	59.0609
47.7682	55.513	64.9047
52.4396	55.4791	63.2498
42.3685	55.3594	66.9113
41.9099	55.2183	37.3053
54.6212	55.1984	54.7689
44.6137	55.162	58.2501
46.9352	55.1308	50.0084
46.8471	55.049	56.609
32.3252	54.9403	57.2518
45.9441	54.9065	54.6284
48.7715	54.904	47.6444
38.3928	54.8925	50.6891
44.705	54.7816	56.8548
46.4827	54.7721	96.2703
48.2906	54.7351	47.0861
45.1592	54.5087	49.1423
37.5392	54.422	55.5645
47.2134	54.414	45.7046
43.2446	54.3272	48.6519
43.2422	54.3204	47.2664
39.328	54.2889	73.7443
44.3303	54.101	77.4053
38.0081	53.9896	65.2976
54.4925	53.9858	44.2916
31.7184	53.9585	60.5441
38.8116	53.836	72.2586
35.2542	53.8105	59.5861
44.5808	53.6195	66.5946
46.9991	53.607	56.5078
44.9229	53.3824	57.6338
36.5258	53.334	48.3053
31.5641	53.3311	77.2152
43.5589	53.1047	60.2481
40.4029	53.0619	63.0188
41.601	52.812	52.4054
44.8883	52.7931	67.0802
38.4324	52.7662	48.701
45.6636	52.7629	53.026
52.4918	52.7191	60.0968
36.4953	52.7178	56.078
54.4366	52.5827	52.9904
47.9008	52.5147	62.735
43.7273	52.5055	46.3772
38.485	52.4143	53.1931
48.1025	52.3908	70.7604
47.1044	52.3538	61.3065
34.6671	52.3313	62.5963
40.8107	52.2699	61.887
34.6398	52.1132	55.5641
41.4429	52.0589	55.5641
47.5868	52.0043	66.8293
40.9366	51.9556	64.5899
40.1767	51.8409	41.8798
40.9636	51.6966	74.2812
38.6255	51.6946	63.3674
33.1447	51.5998	61.8776
52.9718	51.5948	75.3717
55.8895	51.5862	68.089
45.9792	51.5531	63.1517
35.349	51.3482	47.7757
36.7914	51.2916	59.488
36.271	51.247	40.9349
51.1651	51.2146	70.462
39.9363	51.2097	78.458
42.5368	51.1815	58.9108
39.8306	51.1703	68.0603
51.5196	51.0891	65.9065
39.1201	51.0409	68.5776
46.9962	51.0378	51.191
39.9141	51.0118	43.9788
52.7935	51.0021	54.8961
41.0322	50.9198	54.4277
37.3228	50.8854	62.1973
44.2182	50.8809	54.959
50.7083	50.8564	44.5763
45.4386	50.8133	62.918
41.8763	50.7899	53.5055
46.8179	50.7841	50.1759
53.3376	50.7705	65.2365
37.2533	50.7618	71.0108
40.7892	50.5213	51.6213
38.4071	50.4208	44.5731
51.7088	50.3556	56.0738
59.0217	50.3155	44.2518
52.0703	50.2959	53.2698
45.9077	50.2615	58.9529
38.1432	50.1735	35.4386
33.7175	50.1561	50.2814
39.4775	50.1336	56.0669
42.6168	50.0294	49.0847
43.5259	50.0076	66.9146
44.0035	49.9672	48.2929
43.1249	49.9621	60.691
48.0568	49.9607	53.4349
39.3622	49.9302	60.1095
54.6326	49.9144	55.9862
36.792	49.8552	85.8894
43.722	49.7702	42.8552
39.5427	49.7325	48.0047
41.1712	49.6604	52.909
44.0597	49.5635	75.3403
41.5091	49.479	55.4718
42.1013	49.355	56.1097
40.0242	49.3393	53.1827
37.8359	49.339	36.3522
43.6537	49.2961	79.1947
34.6909	49.2727	52.0675
40.9539	49.2361	67.5581
37.1607	49.197	52.1545
45.398	49.1474	51.6172
41.7123	49.077	70.9072
39.2415	49.054	62.5824
57.6614	48.9527	65.2867
49.2301	48.8642	41.3719
46.0487	48.8302	100.149
41.8729	48.651	58.7218
43.2906	48.4656	49.6524
46.6528	48.3485	79.2341
47.0082	48.2218	63.2596
39.5638	48.1559	55.7729
57.8374	47.9355	107.268
37.8372	47.9064	47.9599
40.1277	47.8953	48.4379
46.2454	47.7705	63.395
41.7889	47.715	52.8305
43.6941	47.6816	59.4104
41.9049	47.575	51.0987
41.5197	47.5382	47.248
35.987	47.4629	61.1529
69.2677	47.3796	53.1532
48.2344	47.3198	55.0696
43.1417	47.209	65.8088
44.8919	47.0506
49.5179	47.0152
44.9562	47.008
45.6885	46.9668
41.9293	46.9597
40.3069	46.8606
50.5098	46.7918
38.7951	46.7648
43.3449	46.6302
42.3239	46.4082
44.09	46.2873
39.0474	46.209
42.9267	45.9597
43.5118	45.7638
42.4654	45.6513
56.0215	45.4497
47.2992	45.3922
	45.3765
	45.205
	44.9321
	44.7761
	44.6952
	44.4562
	44.3753
	44.3249
	44.3027
	44.2909
	44.2176
	44.1693
	44.1132
	44.0993
	43.4993
	43.418
	43.2766
	43.2657
	42.8505
	42.7572
	42.6936
	42.6925
	42.4169
	42.2482
	41.9161
	41.8143
	41.7824
	40.9964
	40.8986
	40.8701
	40.6839
	40.5108
	40.2494
	40.0182
	39.9821
	39.75
	39.7113
	39.3297
	38.8169
	37.982
	37.9463
	37.5755
	37.5328
	36.8903
	36.5123

## Sheet: Figure 3-figure supplement 3
Force Histogram (pN)-5 μm/s
RBDK41N	RBDE484K
111.708	53.0463
108.834	44.5968
104.568	43.2114
95.3826	37.9238
91.4176	37.1916
85.8856	61.2225
85.6392	38.7978
81.1134	70.6478
79.3526	62.8202
79.0456	60.9085
78.8771	58.2306
77.0734	57.3907
76.9619	55.3289
76.761	54.7044
76.5306	52.9874
76.3444	52.1822
76.2181	51.7307
75.6862	51.393
75.5918	51.0353
75.3839	50.8657
73.5613	50.4872
73.4154	50.164
73.2429	49.9287
72.9964	49.6689
71.8753	49.6408
71.7811	49.4457
70.8569	48.2396
70.6479	48.0898
70.3183	47.1213
70.1257	46.9243
70.0483	46.9124
69.7879	46.8608
69.7608	46.86
69.1887	46.3943
68.8258	46.1659
68.8188	46.0858
68.5151	46.035
68.2071	45.6837
68.0856	45.4295
67.4983	45.0808
66.5731	44.8748
66.3097	44.8717
66.1784	44.7902
66.1619	44.7195
65.6479	44.6294
65.5232	44.5325
65.4151	44.4433
64.9068	44.3215
64.867	43.8853
64.5843	43.6925
64.0942	43.614
63.7751	43.4549
63.0408	43.4477
62.9457	43.2896
62.828	43.0936
62.7912	42.9104
62.6304	42.8433
62.431	42.792
62.3834	42.5068
62.2952	42.3925
62.0883	42.2754
61.68	42.1006
61.578	42.0944
60.9717	41.5794
60.8861	41.3526
60.8096	41.3459
60.8087	41.0414
60.7643	40.7392
60.6467	40.649
60.6447	40.4949
60.5735	39.6818
60.5142	39.6775
60.4232	39.6195
60.3116	39.4099
60.3001	39.3189
59.9871	39.1875
59.8722	38.7158
59.7198	38.5707
59.6529	38.2431
59.6169	38.0853
59.5843	37.4307
59.4262	37.228
59.3267	36.8329
59.2076	36.6556
59.1057	36.633
58.9919	36.5504
58.9648	36.4446
58.9544	36.3389
58.7206	35.7922
58.5161	34.9164
58.4214	34.8905
58.3838	34.2309
58.2998	33.7412
58.1897	33.6294
58.159	33.3108
58.1469	33.1836
58.1357	31.8183
58.0881	31.6812
57.9429	31.5452
57.8902	31.3685
57.8345	30.3884
57.4148	29.5579
57.157	27.6624
57.0898	27.4129
57.0181	26.541
56.9714	25.4126
56.9255	23.6219
56.9255	50.5171
56.912	46.9243
56.8881	37.8674
56.6972	36.2645
56.4809	29.6458
56.4734	58.371
56.4012	55.7757
56.2954	53.1121
56.247	51.5238
56.2308	50.7064
56.221	50.4078
56.1661	49.7566
56.1347	48.5554
56.1213	48.5482
56.1026	48.226
55.9943	46.5527
55.9849	46.1386
55.9667	46.0128
55.857	45.8636
55.8308	45.8122
55.6311	45.2087
55.6166	44.5972
55.3962	43.8089
55.3887	43.7378
55.3539	43.5434
55.3249	43.2048
55.2557	42.1777
55.2062	40.1803
55.1167	38.7094
55.067	38.3984
54.9871	38.06
54.7969	37.7674
54.7538	37.3081
54.7357	37.2739
54.7077	37.2107
54.5838	36.6095
54.176	35.8484
54.1687	35.5777
54.1605	34.534
54.1395	33.4962
54.1172	33.4364
54.0535	32.7871
54.0468	31.386
53.979	31.0463
53.943	31.0437
53.876	30.6505
53.8677	30.5404
53.8528	30.5319
53.7135	30.4944
53.6899	30.3966
53.6761	29.6602
53.6123	26.8824
53.6099	64.2692
53.5943	72.5476
53.5663	65.9799
53.4928	65.3463
53.3682	63.1609
53.3476	61.4208
53.3377	61.3189
53.3112	58.6334
53.3019	58.1962
53.2382	56.3279
53.1737	56.2909
53.1494	55.981
53.1197	55.6882
53.0332	55.2234
53.0274	54.8809
53.0245	54.7576
53.0057	51.1397
52.9577	50.9694
52.9567	50.8203
52.8874	50.7847
52.63	49.9586
52.6084	49.2931
52.6016	48.595
52.5644	48.0945
52.5443	47.9314
52.3046	47.6191
52.2234	47.4347
52.1956	46.3465
52.152	45.7015
52.1458	44.5793
52.1361	44.3464
52.0395	43.8191
52.0037	43.7493
51.9463	43.5145
51.7499	43.1574
51.7024	42.5664
51.6165	42.0964
51.6054	41.9897
51.5837	41.9497
51.5768	40.9297
51.502	40.8702
51.4932	40.8053
51.4515	39.3772
51.4499	39.1321
51.31	38.7876
51.2896	38.5256
51.284	36.5643
51.2508	36.0918
51.2374	35.3021
51.2225	34.7637
51.1795	34.7097
51.147	34.7057
51.1113	33.4408
51.0779	32.5973
50.9779	32.1755
50.9639	30.6359
50.9275	23.484
50.8746	17.4278
50.754	69.5492
50.7074	59.5481
50.6598	59.5127
50.6288	56.279
50.5225	51.8427
50.5205	51.7373
50.4573	51.2321
50.376	48.9827
50.2527	47.4637
50.207	43.5718
50.1615	41.9255
50.1593	34.2624
50.151	31.9776
50.1134	30.3319
50.1028	84.8821
50.0764	72.6118
49.921	71.6699
49.9063	67.6919
49.8382	65.5521
49.7326	63.985
49.6736	62.9827
49.657	62.3688
49.637	62.0804
49.634	61.9019
49.6065	59.4465
49.5366	58.4161
49.4708	57.7938
49.4421	57.2671
49.4284	57.2637
49.428	56.6865
49.3985	56.5529
49.3603	56.5022
49.3034	55.9691
49.289	55.938
49.249	54.8489
49.2366	54.6128
49.1756	53.5201
49.0539	53.4473
49.0049	53.1309
48.9641	52.7182
48.9379	52.6078
48.9101	52.0668
48.8141	50.7004
48.7907	50.2195
48.7103	50.1281
48.7015	49.9642
48.6857	49.8514
48.6677	49.8326
48.6188	49.1547
48.5965	48.7336
48.5757	48.6413
48.5702	48.5431
48.5574	48.4741
48.5567	48.1129
48.5254	47.1875
48.5183	46.9467
48.4636	46.8618
48.4389	46.6183
48.4355	46.6052
48.3886	46.1475
48.373	45.9875
48.3399	45.9511
48.3359	45.6461
48.3091	45.4085
48.3026	45.3924
48.2009	45.3409
48.1805	45.2256
48.1632	44.91
48.0975	44.4917
48.0211	44.3718
48.0157	44.1447
48.0111	43.991
47.9316	43.4095
47.9053	43.3293
47.8693	43.2081
47.8326	43.0292
47.8068	42.9889
47.8	42.7167
47.7911	41.3489
47.7533	41.2972
47.7459	40.8966
47.7407	40.7703
47.718	40.5998
47.718	40.3304
47.6904	40.2369
47.6808	40.0736
47.636	39.8473
47.6304	39.2228
47.5372	39.1986
47.5226	39.093
47.5103	38.4677
47.3636	38.2915
47.3547	38.1871
47.3503	38.1461
47.3449	37.9331
47.3327	37.6869
47.2516	37.6123
47.2443	37.1688
47.2311	36.2554
47.2178	36.0792
47.2005	35.3432
47.1247	35.2758
47.0785	34.7108
47.0708	34.4827
46.942	34.4427
46.9213	34.3461
46.81	33.314
46.7788	32.8465
46.769	32.6293
46.762	32.2455
46.7007	30.2617
46.6417	30.2507
46.5731	30.1873
46.4974	55.8499
46.4779	46.226
46.4317	42.4211
46.4305	36.8807
46.2567	36.0792
46.2118	72.2539
46.2118	68.9153
46.1886	67.9244
46.1612	66.8968
46.1405	66.4322
46.1256	65.4837
46.0642	63.632
46.0124	63.3733
45.9571	62.8717
45.9552	62.3957
45.9372	61.8006
45.9262	59.2565
45.9041	58.3991
45.8882	57.4299
45.8595	57.0516
45.8236	54.5056
45.8095	52.8321
45.8023	51.9073
45.7943	49.7902
45.7644	49.6967
45.7622	49.3167
45.7483	48.751
45.698	48.2954
45.689	48.1964
45.6783	48.0126
45.6442	47.748
45.6248	47.6708
45.621	47.5998
45.6052	47.0963
45.5361	46.8882
45.5343	46.0583
45.5121	45.905
45.4744	45.7388
45.4486	45.4696
45.4119	45.4259
45.3837	45.0856
45.356	44.4976
45.3545	44.369
45.351	44.0678
45.3454	43.932
45.3029	43.5842
45.2897	43.2473
45.2513	43.1721
45.2397	42.6575
45.2136	42.442
45.1649	41.4754
45.1414	41.1512
45.1205	41.1064
45.1189	41.0927
45.1107	40.8324
45.0841	40.0375
45.0627	39.951
45.0525	39.5155
45.051	39.136
45.0292	38.4501
45.0225	38.2872
44.9245	38.1031
44.9128	37.7915
44.902	37.6499
44.8002	37.1334
44.7622	36.7925
44.6455	36.723
44.6214	36.5611
44.617	36.2735
44.6088	35.7756
44.583	35.6044
44.5719	35.5091
44.5492	35.4931
44.5286	35.4528
44.5132	35.0882
44.511	35.0334
44.4647	34.2877
44.4561	34.1912
44.4543	33.9802
44.4406	33.7956
44.4193	33.0747
44.4193	32.8072
44.3877	31.5918
44.3649	30.1422
44.3578	29.3528
44.3479	24.3358
44.3455	23.4953
44.3364	32.6663
44.2488	65.4957
44.2186
44.2049
44.1831
44.1355
44.0576
44.0503
44.0279
44.0227
44.0069
44.006
43.9408
43.937
43.8896
43.8873
43.8711
43.8361
43.829
43.8154
43.6734
43.6483
43.6443
43.6044
43.5526
43.5289
43.5244
43.5008
43.4986
43.4986
43.4924
43.4764
43.4733
43.4554
43.4433
43.4127
43.3899
43.3667
43.3506
43.3305
43.3184
43.3184
43.3028
43.2887
43.1504
43.1408
43.1257
43.085
43.0835
43.0795
43.0555
43.039
43.0294
43.0231
42.9895
42.9703
42.8956
42.8731
42.8727
42.8594
42.8258
42.7706
42.7314
42.6988
42.6812
42.6561
42.6112
42.6026
42.581
42.5772
42.5754
42.5737
42.5619
42.5171
42.5117
42.4949
42.3835
42.3589
42.3293
42.3251
42.2622
42.2481
42.2349
42.2342
42.222
42.2044
42.1783
42.1652
42.158
42.1576
42.1297
42.1171
42.1044
42.0945
42.0914
42.088
42.0574
42.0219
41.9299
41.9167
41.9009
41.8904
41.8573
41.8509
41.843
41.8143
41.8105
41.7871
41.6921
41.6473
41.5723
41.5685
41.5114
41.4607
41.3307
41.3208
41.2967
41.2854
41.2836
41.2812
41.2671
41.2568
41.209
41.209
41.1792
41.1729
41.0857
41.0481
41.039
41.0119
41.0062
40.9767
40.9505
40.9044
40.8647
40.8428
40.8367
40.7193
40.7187
40.7027
40.688
40.6575
40.6048
40.5806
40.5736
40.562
40.498
40.4635
40.4134
40.3795
40.3618
40.3268
40.3142
40.2823
40.2664
40.2194
40.1989
40.1623
40.1409
40.1396
40.1104
40.0525
40.0354
39.9
39.8722
39.8633
39.7534
39.7523
39.7128
39.6997
39.6452
39.5933
39.5866
39.5473
39.5173
39.5013
39.4892
39.4721
39.4479
39.4181
39.3494
39.3441
39.3242
39.3111
39.2752
39.2115
39.2096
39.1217
39.1161
39.1006
39.0959
39.067
39.0026
38.9589
38.9361
38.927
38.9221
38.917
38.9015
38.9014
38.8515
38.8453
38.8345
38.8146
38.7766
38.7727
38.7475
38.745
38.745
38.7376
38.7323
38.7109
38.7109
38.6944
38.6835
38.661
38.6472
38.6348
38.6266
38.6014
38.5972
38.5806
38.5742
38.5734
38.5477
38.5109
38.5071
38.4743
38.4743
38.4571
38.4298
38.4298
38.4017
38.2987
38.2834
38.2372
38.1833
38.175
38.155
38.0895
38.0852
38.0518
38.0355
37.9639
37.9484
37.9454
37.91
37.8973
37.8897
37.8379
37.8104
37.8075
37.7475
37.7449
37.6509
37.6234
37.6
37.4698
37.467
37.432
37.4239
37.4068
37.3783
37.2988
37.2382
37.2252
37.2223
37.1778
37.1521
37.1413
37.1198
37.1198
37.1173
37.0354
37.0199
37.0078
36.9288
36.9018
36.843
36.824
36.804
36.6852
36.6842
36.6373
36.6317
36.6149
36.5424
36.5277
36.4588
36.3972
36.386
36.3656
36.3397
36.2568
36.2315
36.1972
36.1486
36.1154
36.0713
35.9891
35.9724
35.9595
35.9504
35.9232
35.921
35.8952
35.8432
35.7779
35.7091
35.7084
35.6783
35.6387
35.6013
35.5713
35.5656
35.5332
35.4702
35.4239
35.3382
35.3284
35.2421
35.2043
35.1849
35.1772
35.1547
35.1531
35.1461
35.0854
35.0316
35.0208
35.0134
35.0116
34.9833
34.9485
34.9314
34.836
34.8028
34.7965
34.7702
34.7674
34.7625
34.6426
34.623
34.5976
34.5663
34.505
34.4225
34.4223
34.4197
34.3757
34.306
34.2174
34.1988
34.1421
34.115
34.1119
34.0875
34.0527
34.0044
33.9399
33.9269
33.9242
33.887
33.8488
33.8151
33.8004
33.7476
33.7403
33.7348
33.7161
33.6371
33.588
33.566
33.5424
33.5424
33.453
33.4484
33.3945
33.2049
33.1742
33.1442
33.0916
33.0566
33.0321
33.0159
32.9616
32.9395
32.9179
32.8609
32.8582
32.8285
32.7751
32.7072
32.6722
32.6383
32.573
32.5073
32.3183
32.3078
32.3018
32.0372
32.0124
31.9702
31.97
31.9156
31.8512
31.6961
31.515
31.3278
31.2954
31.2143
31.0323
30.9705
30.9469
30.928
30.8927
30.8056
30.7129
30.635
30.5445
30.4634
30.3657
30.3564
30.3525
30.3258
30.3102
29.9765
29.8708
29.7418
29.7364
29.7314
29.6641
29.1388
29.1339
29.0821
29.0212
28.8754
28.8616
28.7034
28.6698
28.6225
28.4732
28.1544
28.0772
27.9757
27.9445
27.8915
27.7897
27.7561
27.7386
27.703
27.6636
27.2639
27.0814
27.0692
27.0456
26.7324
26.678
26.3276
25.946
25.6808
25.1073
24.8287
24.6648
24.5469
24.1237
24.1069
23.8849
23.6404
23.5759
23.4339
22.7335
22.6123
22.427
21.7749
21.4571
21.2145
