# Supplementary material for: N501Y mutation of spike protein in SARS-CoV-2 strengthens its binding to receptor ACE2
Source: eLife. 2021 Aug 20;10:e69091. doi: 10.7554/eLife.69091 (PMC8455130; doi:10.7554/eLife.69091)
Supplement: Figure 3—source data 2. [file elife-69091-fig3-data2.xlsx]

## Sheet: Figure 3D
Binding Probability (%)
RBD	RBDN501Y	RBDTriple
4.4	11.3	10.9
3.3	14.9	11.1
4	12.8	9.9
3.2	16.5	6.1
4.5	14.2	10.5
