# Supplementary material for: N501Y mutation of spike protein in SARS-CoV-2 strengthens its binding to receptor ACE2
Source: eLife. 2021 Aug 20;10:e69091. doi: 10.7554/eLife.69091 (PMC8455130; doi:10.7554/eLife.69091)
Supplement: Figure 3—source data 3. [file elife-69091-fig3-data3.xlsx]

## Sheet: Figure 3E
3D AFM force mapping
Filename	Position Index	X Position	Y Position	Baseline Offset [N]	Contact Point Offset [m]	Baseline Offset [N]	Baseline Slope [N/m]	Minimum Value [N]	Minimum Position [m]	Maximum Value [N]	Maximum Position [m]	Mean Value [N]	RMS Value [N]
map-data-2021.01.25-17.48.04.912_0000.jpk-force	0	-2.46094e-06	-2.46094e-06	2.436e-09	1.07016e-05	3.83421e-11	-4.66698e-05	-6.85429e-11	1.8447e-07	2.70339e-12	2.20821e-07	-2.9967e-11	2.15082e-11
map-data-2021.01.25-17.48.04.912_0001.jpk-force	1	-2.38281e-06	-2.46094e-06	2.14062e-09	1.09879e-05	1.41713e-11	-6.40727e-05	-1.4393e-11	-6.64395e-07	1.67088e-11	-6.48721e-07	-3.28911e-13	6.56144e-12
map-data-2021.01.25-17.48.04.912_0002.jpk-force	2	-2.30469e-06	-2.46094e-06	1.9021e-09	1.0257e-05	2.21286e-11	-7.4999e-05	-6.25459e-11	-1.4793e-06	7.57003e-12	-1.45127e-06	-3.60712e-11	1.67519e-11
map-data-2021.01.25-17.48.04.912_0003.jpk-force	3	-2.22656e-06	-2.46094e-06	1.64574e-09	1.08378e-05	1.0165e-11	-6.96152e-05	-1.57137e-11	-1.48625e-06	2.34187e-11	-1.49626e-06	-1.69896e-13	7.82893e-12
map-data-2021.01.25-17.48.04.912_0004.jpk-force	4	-2.14844e-06	-2.46094e-06	1.37637e-09	1.07749e-05	2.4209e-11	-6.26918e-05	-2.42073e-11	-1.55573e-06	2.13838e-11	-1.42932e-06	-8.74171e-13	7.73273e-12
map-data-2021.01.25-17.48.04.912_0005.jpk-force	5	-2.07031e-06	-2.46094e-06	1.01628e-09	1.08045e-05	8.49913e-11	-6.71022e-05	-1.62001e-11	-1.82991e-06	1.96004e-11	-1.83926e-06	-1.46145e-12	7.36178e-12
map-data-2021.01.25-17.48.04.912_0006.jpk-force	6	-1.99219e-06	-2.46094e-06	8.94797e-10	1.09182e-05	1.21584e-11	-6.99067e-05	-1.62233e-11	-1.55643e-06	1.88592e-11	-1.54409e-06	-1.44403e-13	8.1713e-12
map-data-2021.01.25-17.48.04.912_0007.jpk-force	7	-1.91406e-06	-2.46094e-06	6.61089e-10	1.08987e-05	1.88248e-11	-6.72397e-05	-1.27515e-11	-1.54782e-06	1.97562e-11	-1.52047e-06	1.07164e-12	7.48643e-12
map-data-2021.01.25-17.48.04.912_0008.jpk-force	8	-1.83594e-06	-2.46094e-06	4.31366e-10	1.07089e-05	-8.25755e-11	-0.000116944	-5.39827e-11	-2.37901e-06	1.9548e-11	-2.3186e-06	-1.7571e-11	1.33786e-11
map-data-2021.01.25-17.48.04.912_0009.jpk-force	9	-1.75781e-06	-2.46094e-06	2.74722e-10	1.06743e-05	4.77503e-11	-2.87579e-05	-1.58725e-11	-1.34983e-06	1.13114e-11	-1.36651e-06	-3.90319e-12	6.4911e-12
map-data-2021.01.25-17.48.04.912_0010.jpk-force	10	-1.67969e-06	-2.46094e-06	6.18753e-11	9.80556e-06	5.23834e-11	-5.45818e-05	-6.39073e-11	2.23579e-08	1.81319e-11	1.50416e-07	-2.53737e-11	2.2786e-11
map-data-2021.01.25-17.48.04.912_0011.jpk-force	11	-1.60156e-06	-2.46094e-06	-2.18099e-10	1.04183e-05	7.68628e-12	-9.51205e-05	-5.15493e-11	-2.10572e-06	8.58389e-12	-2.05534e-06	-2.61766e-11	1.4285e-11
map-data-2021.01.25-17.48.04.912_0012.jpk-force	12	-1.52344e-06	-2.46094e-06	-3.70329e-10	1.06582e-05	4.31299e-11	-5.29118e-05	-1.70357e-11	-1.30301e-06	1.0939e-11	-1.29534e-06	-1.14784e-12	8.03523e-12
map-data-2021.01.25-17.48.04.912_0013.jpk-force	13	-1.44531e-06	-2.46094e-06	-5.4169e-10	9.79977e-06	7.36184e-11	-6.259e-05	-9.10273e-11	-5.23781e-07	-7.74465e-12	-4.81758e-07	-4.23735e-11	1.80115e-11
map-data-2021.01.25-17.48.04.912_0014.jpk-force	14	-1.36719e-06	-2.46094e-06	-7.36264e-10	1.04233e-05	1.84204e-11	-6.58605e-05	-1.59382e-11	-1.34989e-06	1.39992e-11	-1.3679e-06	5.73335e-13	7.45431e-12
map-data-2021.01.25-17.48.04.912_0015.jpk-force	15	-1.28906e-06	-2.46094e-06	-9.52993e-10	1.04269e-05	6.69777e-11	-4.28821e-05	-5.75096e-11	-2.18182e-06	1.80382e-11	-2.14778e-06	-3.17194e-11	2.00192e-11
map-data-2021.01.25-17.48.04.912_0016.jpk-force	16	-1.21094e-06	-2.46094e-06	-1.20786e-09	1.06221e-05	9.73123e-11	-6.17107e-05	-1.90899e-11	-2.198e-06	2.04297e-11	-2.2287e-06	2.16875e-12	7.74311e-12
map-data-2021.01.25-17.48.04.912_0017.jpk-force	17	-1.13281e-06	-2.46094e-06	-1.34056e-09	1.10901e-05	4.79117e-11	-5.46448e-05	-1.56059e-11	-1.55587e-06	7.07583e-12	-1.56021e-06	-5.26205e-12	7.84129e-12
map-data-2021.01.25-17.48.04.912_0018.jpk-force	18	-1.05469e-06	-2.46094e-06	-1.50951e-09	1.08619e-05	2.88676e-14	-8.98739e-05	-1.7935e-11	-1.55815e-06	8.5122e-13	-1.54914e-06	-9.54952e-12	5.92627e-12
map-data-2021.01.25-17.48.04.912_0019.jpk-force	19	-9.76563e-07	-2.46094e-06	-1.60912e-09	9.76709e-06	-3.23342e-10	-0.000299347	-5.38551e-11	-1.86286e-06	6.93244e-12	-1.84751e-06	-1.27289e-11	1.5762e-11
map-data-2021.01.25-17.48.04.912_0020.jpk-force	20	-8.98437e-07	-2.46094e-06	-1.73808e-09	1.02234e-05	-9.42078e-11	-0.000140011	-5.36027e-11	-2.16082e-06	1.80793e-11	-2.08706e-06	-2.12927e-11	1.84243e-11
map-data-2021.01.25-17.48.04.912_0021.jpk-force	21	-8.20313e-07	-2.46094e-06	-1.90355e-09	1.06276e-05	2.9791e-12	-7.18109e-05	-3.64073e-11	-2.25737e-06	2.11748e-11	-2.21699e-06	-6.51178e-12	1.21093e-11
map-data-2021.01.25-17.48.04.912_0022.jpk-force	22	-7.42187e-07	-2.46094e-06	-2.10795e-09	1.05244e-05	1.15101e-11	-6.8905e-05	-3.02721e-11	-1.83277e-06	4.34773e-12	-1.79775e-06	-1.37237e-11	8.10517e-12
map-data-2021.01.25-17.48.04.912_0023.jpk-force	23	-6.64063e-07	-2.46094e-06	-2.23072e-09	1.05057e-05	-7.17704e-11	-0.000100648	-4.77941e-11	-2.66478e-06	2.8286e-11	-2.79427e-06	-2.99043e-12	1.53804e-11
map-data-2021.01.25-17.48.04.912_0024.jpk-force	24	-5.85938e-07	-2.46094e-06	-2.32642e-09	1.02771e-05	-1.96158e-12	-7.38186e-05	-5.45081e-11	-2.32445e-06	8.82596e-12	-2.4209e-06	-2.25612e-11	1.33733e-11
map-data-2021.01.25-17.48.04.912_0025.jpk-force	25	-5.07813e-07	-2.46094e-06	-2.44152e-09	9.31507e-06	1.76016e-11	-8.97004e-05	-8.5515e-12	-1.39619e-07	1.51656e-11	-1.24279e-07	3.03138e-12	6.28874e-12
map-data-2021.01.25-17.48.04.912_0026.jpk-force	26	-4.29688e-07	-2.46094e-06	-2.56852e-09	9.75419e-06	4.46662e-11	-6.72969e-05	-2.2361e-11	-1.31966e-06	1.64715e-11	-1.32299e-06	-5.1281e-12	8.43888e-12
map-data-2021.01.25-17.48.04.912_0027.jpk-force	27	-3.51563e-07	-2.46094e-06	-2.70424e-09	9.76802e-06	5.35037e-11	-6.34914e-05	-1.64355e-11	-1.30368e-06	1.63892e-11	-1.31269e-06	-5.04197e-13	6.4538e-12
map-data-2021.01.25-17.48.04.912_0028.jpk-force	28	-2.73438e-07	-2.46094e-06	-2.86724e-09	9.74364e-06	2.30634e-11	-8.70403e-05	-5.28855e-11	-1.64831e-06	1.5708e-11	-1.55953e-06	-3.08023e-11	1.77281e-11
map-data-2021.01.25-17.48.04.912_0029.jpk-force	29	-1.95313e-07	-2.46094e-06	-2.99445e-09	1.06677e-05	-1.7674e-10	-0.000143182	-5.08599e-11	-2.76902e-06	1.47498e-11	-2.74099e-06	-2.00518e-11	1.63842e-11
map-data-2021.01.25-17.48.04.912_0030.jpk-force	30	-1.17188e-07	-2.46094e-06	-3.11124e-09	1.06297e-05	-8.06827e-11	-0.000109083	-1.04711e-11	-2.75213e-06	3.11436e-11	-2.71675e-06	1.32956e-11	7.3603e-12
map-data-2021.01.25-17.48.04.912_0031.jpk-force	31	-3.90635e-08	-2.46094e-06	-3.22221e-09	1.00071e-05	-5.28066e-11	-0.000122614	-1.34527e-11	-1.34905e-06	1.16322e-11	-1.35606e-06	4.61844e-13	7.04087e-12
map-data-2021.01.25-17.48.04.912_0032.jpk-force	32	3.90618e-08	-2.46094e-06	-3.31008e-09	1.02962e-05	-6.82894e-12	-7.5841e-05	-1.85806e-11	-1.34868e-06	1.1e-11	-1.36036e-06	-2.82825e-12	7.01348e-12
map-data-2021.01.25-17.48.04.912_0033.jpk-force	33	1.17188e-07	-2.46094e-06	-3.45815e-09	1.03951e-05	2.6923e-11	-5.00484e-05	-7.07952e-11	3.64132e-07	1.32954e-11	4.01811e-07	-3.98163e-11	2.41269e-11
map-data-2021.01.25-17.48.04.912_0034.jpk-force	34	1.95312e-07	-2.46094e-06	-3.51814e-09	1.08081e-05	1.59371e-11	-5.04623e-05	-1.77018e-11	3.75354e-07	1.93932e-11	3.60021e-07	4.35537e-13	7.26725e-12
map-data-2021.01.25-17.48.04.912_0035.jpk-force	35	2.73438e-07	-2.46094e-06	-3.60652e-09	1.06347e-05	2.08252e-11	-5.4368e-05	-1.37509e-11	-1.08294e-06	1.19048e-11	-1.09361e-06	7.37516e-13	5.73993e-12
map-data-2021.01.25-17.48.04.912_0036.jpk-force	36	3.51562e-07	-2.46094e-06	-3.69149e-09	1.06458e-05	1.39924e-11	-5.54173e-05	-2.0111e-11	-7.29686e-07	1.94955e-11	-7.72037e-07	-1.79117e-12	7.63519e-12
map-data-2021.01.25-17.48.04.912_0037.jpk-force	37	4.29686e-07	-2.46094e-06	-3.7165e-09	9.44253e-06	6.38342e-11	-5.19968e-05	-6.54966e-11	3.26301e-10	1.82645e-11	7.26928e-08	-2.9605e-11	2.11469e-11
map-data-2021.01.25-17.48.04.912_0038.jpk-force	38	5.07812e-07	-2.46094e-06	-3.84686e-09	1.06753e-05	1.49696e-11	-5.95033e-05	-5.81326e-11	-1.00672e-06	2.09208e-11	-9.34692e-07	-1.05107e-11	1.37324e-11
map-data-2021.01.25-17.48.04.912_0039.jpk-force	39	5.85936e-07	-2.46094e-06	-3.98697e-09	1.09014e-05	-5.76909e-11	-8.80172e-05	-6.54506e-11	-2.79864e-06	5.19359e-12	-2.77394e-06	-2.43274e-11	1.38604e-11
map-data-2021.01.25-17.48.04.912_0040.jpk-force	40	6.64062e-07	-2.46094e-06	-4.06987e-09	1.12698e-05	-1.81192e-11	-7.5184e-05	-1.84434e-11	-2.80552e-06	2.41972e-11	-2.83956e-06	5.09571e-12	8.20918e-12
map-data-2021.01.25-17.48.04.912_0041.jpk-force	41	7.42187e-07	-2.46094e-06	-4.179e-09	1.13858e-05	-2.35608e-11	-8.15263e-05	-2.18584e-11	-2.835e-06	2.10706e-11	-2.77693e-06	-1.49481e-12	9.09603e-12
map-data-2021.01.25-17.48.04.912_0042.jpk-force	42	8.20312e-07	-2.46094e-06	-4.23704e-09	1.06233e-05	5.28417e-11	-4.98372e-05	-2.24552e-11	9.51919e-07	2.1157e-11	9.19577e-07	2.92036e-13	7.87238e-12
map-data-2021.01.25-17.48.04.912_0043.jpk-force	43	8.98437e-07	-2.46094e-06	-4.27114e-09	9.56652e-06	1.71667e-11	-8.32832e-05	-4.01721e-11	-1.09605e-06	3.12201e-11	-1.0243e-06	-6.15152e-12	1.11363e-11
map-data-2021.01.25-17.48.04.912_0044.jpk-force	44	9.76562e-07	-2.46094e-06	-4.42024e-09	1.08389e-05	1.29033e-11	-8.78418e-05	-2.04642e-11	-4.55592e-07	1.18555e-11	-4.21576e-07	-2.29812e-12	6.4485e-12
map-data-2021.01.25-17.48.04.912_0045.jpk-force	45	1.05469e-06	-2.46094e-06	-4.40966e-09	9.9043e-06	4.97778e-11	-4.43679e-05	-7.12632e-11	6.78388e-07	2.4863e-11	7.14072e-07	-1.80299e-11	2.36747e-11
map-data-2021.01.25-17.48.04.912_0046.jpk-force	46	1.13281e-06	-2.46094e-06	-4.47807e-09	1.07801e-05	6.77316e-12	-5.66226e-05	-3.46989e-11	-1.45479e-06	1.04174e-11	-1.41377e-06	-6.49335e-12	1.21032e-11
map-data-2021.01.25-17.48.04.912_0047.jpk-force	47	1.21094e-06	-2.46094e-06	-4.54225e-09	1.06369e-05	-5.55141e-12	-6.85348e-05	-3.67664e-11	-2.10556e-06	2.26554e-11	-2.07018e-06	-3.63205e-12	1.23116e-11
map-data-2021.01.25-17.48.04.912_0048.jpk-force	48	1.28906e-06	-2.46094e-06	-4.58782e-09	1.0587e-05	-3.81354e-12	-6.46647e-05	-1.86113e-11	-2.02478e-06	2.44745e-11	-1.99141e-06	1.56122e-15	8.92287e-12
map-data-2021.01.25-17.48.04.912_0049.jpk-force	49	1.36719e-06	-2.46094e-06	-4.63497e-09	1.04476e-05	1.56839e-11	-5.2657e-05	-4.18109e-11	-1.73725e-06	1.8984e-11	-1.64984e-06	-1.14974e-11	1.36878e-11
map-data-2021.01.25-17.48.04.912_0050.jpk-force	50	1.44531e-06	-2.46094e-06	-4.71684e-09	9.68556e-06	5.12122e-11	-6.94225e-05	-9.24042e-11	-7.55683e-07	1.52554e-11	-6.82964e-07	-3.36441e-11	3.23644e-11
map-data-2021.01.25-17.48.04.912_0051.jpk-force	51	1.52344e-06	-2.46094e-06	-4.78404e-09	1.04725e-05	9.97585e-12	-5.85031e-05	-1.65709e-11	-6.3886e-07	3.09509e-11	-7.87257e-07	6.13331e-12	8.54777e-12
map-data-2021.01.25-17.48.04.912_0052.jpk-force	52	1.60156e-06	-2.46094e-06	-4.83594e-09	1.08239e-05	1.4985e-11	-5.70437e-05	-1.88097e-11	-7.96105e-07	1.74581e-11	-6.71719e-07	1.59129e-13	7.83445e-12
map-data-2021.01.25-17.48.04.912_0053.jpk-force	53	1.67969e-06	-2.46094e-06	-4.88425e-09	1.077e-05	1.39237e-11	-5.29662e-05	-5.89351e-11	-1.0742e-06	2.09336e-11	-1.0135e-06	-1.63259e-11	1.8126e-11
map-data-2021.01.25-17.48.04.912_0054.jpk-force	54	1.75781e-06	-2.46094e-06	-4.94908e-09	1.07807e-05	9.51638e-12	-6.25534e-05	-1.81318e-11	-1.00466e-06	2.19533e-11	-1.02433e-06	1.80818e-12	8.10113e-12
map-data-2021.01.25-17.48.04.912_0055.jpk-force	55	1.83594e-06	-2.46094e-06	-5.04416e-09	1.03192e-05	9.23122e-12	-0.000107977	-3.1304e-11	-1.13399e-06	1.09765e-11	-1.04695e-06	-8.36407e-12	8.83265e-12
map-data-2021.01.25-17.48.04.912_0056.jpk-force	56	1.91406e-06	-2.46094e-06	-5.05085e-09	1.03228e-05	-5.7546e-13	-7.30436e-05	-6.64029e-11	-1.09636e-06	-2.09237e-11	-1.09136e-06	-4.42277e-11	8.05686e-12
map-data-2021.01.25-17.48.04.912_0057.jpk-force	57	1.99219e-06	-2.46094e-06	-5.08381e-09	1.03706e-05	-4.42235e-13	-6.73889e-05	-3.6435e-11	-2.16624e-06	1.54889e-11	-2.14554e-06	-1.41676e-11	1.00544e-11
map-data-2021.01.25-17.48.04.912_0058.jpk-force	58	2.07031e-06	-2.46094e-06	-5.13571e-09	1.02949e-05	1.83608e-11	-6.49134e-05	-1.31717e-11	-2.5751e-07	1.98233e-11	-1.99816e-07	6.9587e-13	7.26875e-12
map-data-2021.01.25-17.48.04.912_0059.jpk-force	59	2.14844e-06	-2.46094e-06	-5.18542e-09	1.04147e-05	1.28397e-11	-4.68505e-05	-1.55499e-11	-2.58219e-07	1.80142e-11	-2.00191e-07	1.6659e-12	7.23765e-12
map-data-2021.01.25-17.48.04.912_0060.jpk-force	60	2.22656e-06	-2.46094e-06	-5.21562e-09	1.01058e-05	2.00875e-11	-2.70587e-05	-2.06388e-11	-2.52117e-07	1.93728e-11	-2.161e-07	1.54466e-13	7.92419e-12
map-data-2021.01.25-17.48.04.912_0061.jpk-force	61	2.30469e-06	-2.46094e-06	-5.28228e-09	1.03816e-05	7.45753e-12	-8.44428e-05	-1.39262e-11	-2.47819e-07	1.87831e-11	-1.98463e-07	2.71918e-13	7.24513e-12
map-data-2021.01.25-17.48.04.912_0062.jpk-force	62	2.38281e-06	-2.46094e-06	-5.34459e-09	9.73847e-06	2.77178e-11	-4.56182e-05	-5.22278e-11	-2.16839e-06	1.96324e-11	-2.00418e-06	-1.59106e-11	1.84014e-11
map-data-2021.01.25-17.48.04.912_0063.jpk-force	63	2.46094e-06	-2.46094e-06	-5.34598e-09	1.02275e-05	-5.11718e-12	-6.03496e-05	-1.99015e-11	-1.73521e-06	2.40063e-11	-1.6775e-06	-8.19124e-13	8.30057e-12
map-data-2021.01.25-17.48.04.912_0064.jpk-force	64	2.46094e-06	-2.38281e-06	-5.38611e-09	1.02446e-05	3.18359e-12	-5.50013e-05	-6.14871e-11	-1.40801e-06	1.9808e-11	-1.15189e-06	-3.19564e-11	1.47897e-11
map-data-2021.01.25-17.48.04.912_0065.jpk-force	65	2.38281e-06	-2.38281e-06	-5.43066e-09	1.02565e-05	2.06218e-11	-4.73221e-05	-2.0197e-11	-1.26495e-06	2.43525e-11	-1.39835e-06	2.94039e-12	8.02216e-12
map-data-2021.01.25-17.48.04.912_0066.jpk-force	66	2.30469e-06	-2.38281e-06	-5.45675e-09	1.01756e-05	1.67636e-11	-4.80598e-05	-1.93216e-11	-6.7727e-07	2.0726e-11	-6.80605e-07	7.16995e-13	9.95577e-12
map-data-2021.01.25-17.48.04.912_0067.jpk-force	67	2.22656e-06	-2.38281e-06	-5.51118e-09	1.02561e-05	1.72762e-11	-3.93983e-05	-1.71537e-11	-6.61021e-07	1.43198e-11	-6.82697e-07	2.13162e-12	7.16594e-12
map-data-2021.01.25-17.48.04.912_0068.jpk-force	68	2.14844e-06	-2.38281e-06	-5.58251e-09	9.71812e-06	4.82358e-11	-5.87949e-05	-4.4477e-11	-1.79012e-06	1.46495e-11	-1.7187e-06	-1.13428e-11	1.23167e-11
map-data-2021.01.25-17.48.04.912_0069.jpk-force	69	2.07031e-06	-2.38281e-06	-5.60548e-09	1.03737e-05	-9.81767e-12	-6.25951e-05	-4.67726e-11	-2.30661e-06	1.81044e-11	-2.28058e-06	-1.12684e-11	1.592e-11
map-data-2021.01.25-17.48.04.912_0070.jpk-force	70	1.99219e-06	-2.38281e-06	-5.63582e-09	1.03114e-05	2.80223e-11	-5.36402e-05	-1.85432e-11	-2.19441e-06	2.25625e-11	-2.34126e-06	7.98224e-13	8.61245e-12
map-data-2021.01.25-17.48.04.912_0071.jpk-force	71	1.91406e-06	-2.38281e-06	-5.68078e-09	1.06887e-05	-2.4633e-11	-8.09934e-05	-1.48903e-11	-2.33664e-06	2.98469e-11	-2.3313e-06	7.39357e-12	9.35523e-12
map-data-2021.01.25-17.48.04.912_0072.jpk-force	72	1.83594e-06	-2.38281e-06	-5.7057e-09	1.01403e-05	3.48373e-11	-5.48717e-05	-5.27677e-11	1.66106e-08	2.65398e-11	1.56344e-07	-1.16553e-11	1.65412e-11
map-data-2021.01.25-17.48.04.912_0073.jpk-force	73	1.75781e-06	-2.38281e-06	-5.74265e-09	1.06002e-05	1.60421e-11	-4.83627e-05	-1.87256e-11	2.34471e-08	2.14871e-11	1.88517e-07	-2.42708e-13	7.70311e-12
map-data-2021.01.25-17.48.04.912_0074.jpk-force	74	1.67969e-06	-2.38281e-06	-5.78901e-09	1.07861e-05	1.49396e-11	-5.57851e-05	-1.64177e-11	-7.5362e-07	9.65853e-12	-7.48618e-07	-2.43412e-12	6.81165e-12
map-data-2021.01.25-17.48.04.912_0075.jpk-force	75	1.60156e-06	-2.38281e-06	-5.85535e-09	1.09724e-05	2.22105e-11	-6.96684e-05	-1.62759e-11	-7.42594e-07	1.30729e-11	-7.35924e-07	-3.8008e-12	7.97193e-12
map-data-2021.01.25-17.48.04.912_0076.jpk-force	76	1.52344e-06	-2.38281e-06	-5.85777e-09	1.07701e-05	-3.92576e-11	-7.71745e-05	-2.36526e-11	-2.00853e-06	2.06552e-11	-2.0142e-06	-3.2455e-12	7.94323e-12
map-data-2021.01.25-17.48.04.912_0077.jpk-force	77	1.44531e-06	-2.38281e-06	-5.86115e-09	1.02892e-05	-6.30115e-12	-8.07305e-05	-9.19838e-13	-2.00975e-06	4.3137e-11	-2.02911e-06	1.93716e-11	8.31014e-12
map-data-2021.01.25-17.48.04.912_0078.jpk-force	78	1.36719e-06	-2.38281e-06	-5.89367e-09	9.47118e-06	2.54546e-11	-5.75892e-05	-2.07983e-11	6.40258e-07	2.14887e-11	5.30211e-07	-1.93081e-13	7.0799e-12
map-data-2021.01.25-17.48.04.912_0079.jpk-force	79	1.28906e-06	-2.38281e-06	-5.98662e-09	1.07279e-05	6.31576e-12	-6.53944e-05	-8.09409e-12	2.73143e-07	2.87484e-11	3.0782e-07	1.55686e-11	8.00068e-12
map-data-2021.01.25-17.48.04.912_0080.jpk-force	80	1.21094e-06	-2.38281e-06	-6.00269e-09	1.11377e-05	1.9005e-11	-5.34281e-05	-3.63395e-11	-1.09599e-06	1.66285e-11	-9.30917e-07	-8.86178e-12	9.78778e-12
map-data-2021.01.25-17.48.04.912_0081.jpk-force	81	1.13281e-06	-2.38281e-06	-6.03972e-09	1.07521e-05	2.45585e-11	-5.11705e-05	-7.23249e-12	-1.01894e-06	3.72221e-11	-1.11566e-06	1.46484e-11	8.43981e-12
map-data-2021.01.25-17.48.04.912_0082.jpk-force	82	1.05469e-06	-2.38281e-06	-6.03394e-09	1.07934e-05	1.68925e-11	-3.59579e-05	-3.13456e-12	-1.05433e-06	3.43881e-11	-1.03732e-06	1.5502e-11	7.16269e-12
map-data-2021.01.25-17.48.04.912_0083.jpk-force	83	9.76563e-07	-2.38281e-06	-6.09058e-09	1.03314e-05	3.69877e-11	-4.91553e-05	-6.0047e-11	-1.06457e-06	1.52643e-11	-1.03622e-06	-1.86261e-11	2.11866e-11
map-data-2021.01.25-17.48.04.912_0084.jpk-force	84	8.98437e-07	-2.38281e-06	-6.10221e-09	1.07407e-05	1.88869e-11	-5.40847e-05	-1.78496e-11	-6.78866e-07	1.57886e-11	-6.72864e-07	-2.9038e-12	8.30397e-12
map-data-2021.01.25-17.48.04.912_0085.jpk-force	85	8.20312e-07	-2.38281e-06	-6.14841e-09	1.09458e-05	-3.31228e-12	-5.70715e-05	-1.3498e-11	-6.65364e-07	2.12696e-11	-6.82371e-07	4.27759e-12	8.55158e-12
map-data-2021.01.25-17.48.04.912_0086.jpk-force	86	7.42187e-07	-2.38281e-06	-6.11219e-09	1.08199e-05	1.53253e-11	-5.17548e-05	-1.06982e-11	-6.85751e-07	1.33924e-11	-6.56072e-07	1.70253e-13	5.94886e-12
map-data-2021.01.25-17.48.04.912_0087.jpk-force	87	6.64062e-07	-2.38281e-06	-6.07641e-09	1.04801e-05	-1.54188e-11	-6.7272e-05	-4.18285e-11	-2.17866e-06	1.86639e-11	-2.10457e-06	-1.37316e-11	1.3342e-11
map-data-2021.01.25-17.48.04.912_0088.jpk-force	88	5.85938e-07	-2.38281e-06	-6.09373e-09	1.05667e-05	-2.32652e-11	-7.48319e-05	-2.22619e-11	-2.16782e-06	2.18528e-11	-2.09406e-06	-1.28805e-12	9.03063e-12
map-data-2021.01.25-17.48.04.912_0089.jpk-force	89	5.07813e-07	-2.38281e-06	-6.136e-09	1.08227e-05	-2.55838e-11	-7.40534e-05	-2.22873e-11	-2.16857e-06	2.11833e-11	-2.1095e-06	1.39851e-13	8.61723e-12
map-data-2021.01.25-17.48.04.912_0090.jpk-force	90	4.29687e-07	-2.38281e-06	-6.14126e-09	1.04056e-05	2.7149e-12	-6.08891e-05	-3.50012e-11	-2.26039e-06	1.88707e-11	-2.17362e-06	-5.18066e-12	1.18155e-11
map-data-2021.01.25-17.48.04.912_0091.jpk-force	91	3.51563e-07	-2.38281e-06	-6.19309e-09	1.08813e-05	-2.26099e-11	-7.59137e-05	-1.91652e-11	-1.71001e-06	2.25003e-11	-1.76705e-06	3.47011e-13	8.40212e-12
map-data-2021.01.25-17.48.04.912_0092.jpk-force	92	2.73438e-07	-2.38281e-06	-6.17717e-09	1.04432e-05	7.64942e-12	-6.32777e-05	-3.92619e-11	-2.31047e-06	2.36605e-11	-2.21235e-06	-9.52245e-12	1.47568e-11
map-data-2021.01.25-17.48.04.912_0093.jpk-force	93	1.95312e-07	-2.38281e-06	-6.22881e-09	1.11168e-05	4.54105e-12	-6.3885e-05	-9.83376e-12	-2.1927e-06	3.58245e-11	-2.1343e-06	1.44328e-11	8.63054e-12
map-data-2021.01.25-17.48.04.912_0094.jpk-force	94	1.17187e-07	-2.38281e-06	-6.20914e-09	1.08631e-05	1.07859e-11	-5.77631e-05	-2.28311e-11	-2.28518e-06	2.443e-11	-2.21143e-06	4.10637e-13	9.12426e-12
map-data-2021.01.25-17.48.04.912_0095.jpk-force	95	3.90618e-08	-2.38281e-06	-6.2422e-09	1.08651e-05	1.08044e-11	-6.2881e-05	-2.39015e-11	-2.24682e-06	1.98258e-11	-2.17374e-06	2.3627e-12	8.09959e-12
map-data-2021.01.25-17.48.04.912_0096.jpk-force	96	-3.90623e-08	-2.38281e-06	-6.25947e-09	1.04811e-05	1.1686e-11	-5.68526e-05	-3.19725e-11	-2.54371e-06	1.19877e-11	-2.52369e-06	-1.19591e-11	1.08952e-11
map-data-2021.01.25-17.48.04.912_0097.jpk-force	97	-1.17187e-07	-2.38281e-06	-6.27056e-09	1.05795e-05	-3.11531e-12	-6.83705e-05	-3.6303e-11	-2.31369e-06	1.75761e-11	-2.28732e-06	-1.13281e-11	1.19451e-11
map-data-2021.01.25-17.48.04.912_0098.jpk-force	98	-1.95313e-07	-2.38281e-06	-6.30747e-09	1.04727e-05	1.86703e-13	-5.54881e-05	-2.07707e-11	-1.21023e-06	2.71966e-11	-1.21857e-06	2.07343e-12	1.26841e-11
map-data-2021.01.25-17.48.04.912_0099.jpk-force	99	-2.73438e-07	-2.38281e-06	-6.33098e-09	1.01417e-05	4.35461e-11	-5.44947e-05	-5.03249e-11	1.29819e-07	2.42939e-11	2.57547e-07	-2.10013e-11	1.62967e-11
map-data-2021.01.25-17.48.04.912_0100.jpk-force	100	-3.51563e-07	-2.38281e-06	-6.35238e-09	1.05732e-05	1.73752e-11	-5.17459e-05	-1.93919e-11	2.06118e-07	2.26322e-11	1.49767e-07	-6.14446e-13	8.46995e-12
map-data-2021.01.25-17.48.04.912_0101.jpk-force	101	-4.29688e-07	-2.38281e-06	-6.34149e-09	9.9791e-06	-5.46457e-11	-0.000122244	-6.55318e-11	-1.6194e-06	5.9567e-12	-1.58469e-06	-3.04886e-11	1.57134e-11
map-data-2021.01.25-17.48.04.912_0102.jpk-force	102	-5.07813e-07	-2.38281e-06	-6.33719e-09	1.04905e-05	2.85134e-12	-6.27681e-05	-6.87599e-11	-2.5258e-06	1.06571e-11	-2.40632e-06	-3.44188e-11	1.80672e-11
map-data-2021.01.25-17.48.04.912_0103.jpk-force	103	-5.85938e-07	-2.38281e-06	-6.42661e-09	1.01139e-05	3.45355e-11	-7.60353e-05	-1.15469e-11	-7.43089e-07	1.92452e-11	-7.18412e-07	3.86331e-12	5.79151e-12
map-data-2021.01.25-17.48.04.912_0104.jpk-force	104	-6.64063e-07	-2.38281e-06	-6.39469e-09	1.02979e-05	1.33757e-11	-5.08248e-05	-1.78451e-11	-7.15519e-07	1.95574e-11	-7.10517e-07	2.11436e-12	8.16719e-12
map-data-2021.01.25-17.48.04.912_0105.jpk-force	105	-7.42187e-07	-2.38281e-06	-6.42426e-09	1.01764e-05	-1.35134e-12	-6.41953e-05	-2.11867e-11	-1.53682e-06	1.95877e-11	-1.37371e-06	-1.57917e-12	8.22031e-12
map-data-2021.01.25-17.48.04.912_0106.jpk-force	106	-8.20313e-07	-2.38281e-06	-6.37986e-09	1.05867e-05	-6.82569e-11	-8.31119e-05	-1.74208e-11	-1.48464e-06	2.87571e-11	-1.38559e-06	2.69827e-12	8.72684e-12
map-data-2021.01.25-17.48.04.912_0107.jpk-force	107	-8.98437e-07	-2.38281e-06	-6.4121e-09	1.01734e-05	2.46768e-11	-5.46881e-05	-6.24091e-11	-2.21425e-06	1.58054e-11	-2.04905e-06	-1.54195e-11	1.88855e-11
map-data-2021.01.25-17.48.04.912_0108.jpk-force	108	-9.76563e-07	-2.38281e-06	-6.42625e-09	1.00876e-05	4.34614e-12	-6.28863e-05	-2.24642e-11	-2.01033e-06	3.06138e-11	-2.19988e-06	3.44496e-12	9.57947e-12
map-data-2021.01.25-17.48.04.912_0109.jpk-force	109	-1.05469e-06	-2.38281e-06	-6.46262e-09	1.04019e-05	2.4471e-11	-4.40758e-05	-2.04267e-11	-2.08464e-06	2.03647e-11	-2.26316e-06	-1.89121e-13	8.15635e-12
map-data-2021.01.25-17.48.04.912_0110.jpk-force	110	-1.13281e-06	-2.38281e-06	-6.45461e-09	1.04069e-05	1.01096e-10	1.29875e-05	-2.30984e-11	-2.18927e-06	2.86991e-11	-2.20962e-06	-3.44583e-13	8.22008e-12
map-data-2021.01.25-17.48.04.912_0111.jpk-force	111	-1.21094e-06	-2.38281e-06	-6.47371e-09	1.02284e-05	1.10826e-11	-4.41676e-05	-1.03236e-11	-9.48926e-07	1.52847e-11	-9.53928e-07	2.04585e-12	5.84854e-12
map-data-2021.01.25-17.48.04.912_0112.jpk-force	112	-1.28906e-06	-2.38281e-06	-6.49216e-09	1.00463e-05	-4.9961e-11	-9.24418e-05	-2.94369e-12	-9.81009e-07	3.82789e-11	-9.46993e-07	1.83487e-11	8.49351e-12
map-data-2021.01.25-17.48.04.912_0113.jpk-force	113	-1.36719e-06	-2.38281e-06	-6.49986e-09	1.01871e-05	-3.75083e-12	-5.54285e-05	-1.46643e-11	-9.56996e-07	2.47408e-11	-9.5266e-07	6.10162e-12	9.66467e-12
map-data-2021.01.25-17.48.04.912_0114.jpk-force	114	-1.44531e-06	-2.38281e-06	-6.58429e-09	1.03638e-05	3.87216e-11	-5.1886e-05	-2.34761e-11	-1.49568e-06	2.61871e-11	-1.49135e-06	-1.11864e-12	1.0372e-11
map-data-2021.01.25-17.48.04.912_0115.jpk-force	115	-1.52344e-06	-2.38281e-06	-6.55206e-09	9.8861e-06	2.78984e-11	-3.38865e-05	-1.56998e-11	-1.47774e-06	1.52592e-11	-1.49408e-06	-2.19005e-12	7.27637e-12
map-data-2021.01.25-17.48.04.912_0116.jpk-force	116	-1.60156e-06	-2.38281e-06	-6.54544e-09	1.00465e-05	-6.02146e-11	-8.5637e-05	-3.22675e-11	-2.70963e-06	2.80707e-11	-2.65057e-06	-3.72723e-12	1.48793e-11
map-data-2021.01.25-17.48.04.912_0117.jpk-force	117	-1.67969e-06	-2.38281e-06	-6.53797e-09	1.02006e-05	-3.69854e-11	-7.11247e-05	-1.4484e-11	-2.64987e-06	1.79381e-11	-2.72496e-06	1.29838e-12	7.38199e-12
map-data-2021.01.25-17.48.04.912_0118.jpk-force	118	-1.75781e-06	-2.38281e-06	-6.63585e-09	1.04793e-05	2.83498e-11	-5.80973e-05	-3.17714e-11	-1.90069e-06	2.66712e-11	-1.84264e-06	-6.50898e-12	1.18979e-11
map-data-2021.01.25-17.48.04.912_0119.jpk-force	119	-1.83594e-06	-2.38281e-06	-6.6197e-09	1.09967e-05	2.44168e-11	-2.69621e-05	-1.93126e-12	-1.83909e-06	4.49283e-11	-1.91015e-06	2.06845e-11	9.46115e-12
map-data-2021.01.25-17.48.04.912_0120.jpk-force	120	-1.91406e-06	-2.38281e-06	-6.59969e-09	1.04341e-05	2.55454e-11	-4.13667e-05	-1.22789e-11	-1.86582e-06	3.83179e-11	-1.92321e-06	1.6036e-11	1.0974e-11
map-data-2021.01.25-17.48.04.912_0121.jpk-force	121	-1.99219e-06	-2.38281e-06	-6.62585e-09	1.02531e-05	5.0433e-11	-5.00865e-05	-5.30458e-11	-1.19949e-06	1.15058e-11	-1.12846e-06	-2.47686e-11	1.49528e-11
map-data-2021.01.25-17.48.04.912_0122.jpk-force	122	-2.07031e-06	-2.38281e-06	-6.59873e-09	1.00076e-05	3.52744e-12	-7.68563e-05	-1.85691e-11	-1.11741e-06	2.37343e-11	-1.20579e-06	1.89941e-13	8.26744e-12
map-data-2021.01.25-17.48.04.912_0123.jpk-force	123	-2.14844e-06	-2.38281e-06	-6.6191e-09	1.02685e-05	1.64307e-11	-5.99264e-05	-7.77338e-11	-1.93941e-06	-3.38996e-12	-1.88069e-06	-5.00989e-11	1.23967e-11
map-data-2021.01.25-17.48.04.912_0124.jpk-force	124	-2.22656e-06	-2.38281e-06	-6.65744e-09	1.03418e-05	7.36583e-12	-5.92101e-05	-6.02754e-12	-2.03149e-06	3.8558e-11	-2.13225e-06	1.5046e-11	8.17981e-12
map-data-2021.01.25-17.48.04.912_0125.jpk-force	125	-2.30469e-06	-2.38281e-06	-6.65286e-09	9.97754e-06	1.22902e-12	-8.23592e-05	-1.40392e-11	-1.71125e-06	2.12765e-11	-1.70558e-06	2.2097e-12	8.05381e-12
map-data-2021.01.25-17.48.04.912_0126.jpk-force	126	-2.38281e-06	-2.38281e-06	-6.65512e-09	1.0258e-05	-2.77586e-11	-6.33991e-05	-1.17527e-11	-1.65621e-06	3.14615e-11	-1.70459e-06	9.63875e-12	8.2201e-12
map-data-2021.01.25-17.48.04.912_0127.jpk-force	127	-2.46094e-06	-2.38281e-06	-6.65022e-09	9.60441e-06	-1.26513e-10	-0.000143635	-4.69273e-11	-1.99301e-06	1.09356e-11	-1.94829e-06	-1.54118e-11	1.37846e-11
map-data-2021.01.25-17.48.04.912_0128.jpk-force	128	-2.46094e-06	-2.30469e-06	-6.71506e-09	1.03251e-05	-3.6857e-11	-9.0149e-05	-4.99403e-11	-2.44111e-06	2.18025e-11	-2.40573e-06	-4.72547e-12	1.57503e-11
map-data-2021.01.25-17.48.04.912_0129.jpk-force	129	-2.38281e-06	-2.30469e-06	-6.68778e-09	1.06415e-05	-7.5647e-11	-8.47006e-05	-6.10173e-12	-2.40629e-06	3.34608e-11	-2.44767e-06	1.49098e-11	6.93426e-12
map-data-2021.01.25-17.48.04.912_0130.jpk-force	130	-2.30469e-06	-2.30469e-06	-6.66647e-09	1.06896e-05	2.91274e-11	-3.55985e-05	-4.10593e-11	-1.91727e-06	3.03988e-11	-1.85888e-06	-6.80134e-12	1.7068e-11
map-data-2021.01.25-17.48.04.912_0131.jpk-force	131	-2.22656e-06	-2.30469e-06	-6.67935e-09	1.06413e-05	1.67618e-11	-4.60709e-05	-4.34179e-11	-1.82391e-06	9.48946e-12	-1.77753e-06	-1.88329e-11	1.38137e-11
map-data-2021.01.25-17.48.04.912_0132.jpk-force	132	-2.14844e-06	-2.30469e-06	-6.71388e-09	9.90431e-06	5.84902e-11	-5.45594e-05	-6.35533e-11	8.59909e-10	2.18152e-11	7.42238e-08	-1.84664e-11	1.97317e-11
map-data-2021.01.25-17.48.04.912_0133.jpk-force	133	-2.07031e-06	-2.30469e-06	-6.7242e-09	1.06558e-05	8.71663e-12	-5.52244e-05	-5.78015e-11	-1.55152e-06	1.90513e-11	-1.38641e-06	-1.89948e-11	1.68574e-11
map-data-2021.01.25-17.48.04.912_0134.jpk-force	134	-1.99219e-06	-2.30469e-06	-6.72429e-09	9.76833e-06	6.19722e-11	-4.70592e-05	-5.65941e-11	6.87312e-08	2.36799e-11	2.1746e-07	-1.21113e-11	1.93349e-11
map-data-2021.01.25-17.48.04.912_0135.jpk-force	135	-1.91406e-06	-2.30469e-06	-6.70844e-09	1.06364e-05	1.04407e-11	-5.02337e-05	-1.83886e-11	1.96033e-07	2.07138e-11	7.20096e-08	-7.53124e-13	7.38977e-12
map-data-2021.01.25-17.48.04.912_0136.jpk-force	136	-1.83594e-06	-2.30469e-06	-6.75503e-09	1.12094e-05	1.70601e-11	-5.29135e-05	-5.59655e-11	-1.30278e-06	2.27587e-11	-1.25908e-06	-1.79097e-11	2.07361e-11
map-data-2021.01.25-17.48.04.912_0137.jpk-force	137	-1.75781e-06	-2.30469e-06	-6.69532e-09	1.12434e-05	-1.03443e-11	-5.74948e-05	-4.55307e-11	-1.5725e-06	1.23657e-11	-1.51547e-06	-1.48454e-11	1.36947e-11
map-data-2021.01.25-17.48.04.912_0138.jpk-force	138	-1.67969e-06	-2.30469e-06	-6.7584e-09	1.10504e-05	2.63545e-11	-5.07586e-05	-5.95074e-11	-8.98361e-07	1.82347e-11	-7.74308e-07	-2.19164e-11	1.98943e-11
map-data-2021.01.25-17.48.04.912_0139.jpk-force	139	-1.60156e-06	-2.30469e-06	-6.7549e-09	1.03605e-05	-6.57984e-11	-9.84574e-05	-5.24963e-11	-2.37357e-06	1.33752e-11	-2.3165e-06	-2.53083e-11	1.55501e-11
map-data-2021.01.25-17.48.04.912_0140.jpk-force	140	-1.52344e-06	-2.30469e-06	-6.70499e-09	8.70619e-06	8.22768e-11	-4.05065e-05	-1.59446e-11	1.0822e-06	1.87705e-11	1.15424e-06	-1.52321e-12	7.76782e-12
map-data-2021.01.25-17.48.04.912_0141.jpk-force	141	-1.44531e-06	-2.30469e-06	-6.72376e-09	1.02516e-05	4.60761e-12	-5.76495e-05	-1.87605e-11	-1.80082e-06	1.85488e-11	-1.76579e-06	-1.17931e-12	8.12223e-12
map-data-2021.01.25-17.48.04.912_0142.jpk-force	142	-1.36719e-06	-2.30469e-06	-6.74191e-09	1.03582e-05	9.6197e-12	-5.44711e-05	-1.78253e-11	-1.7318e-06	2.12101e-11	-1.75215e-06	-6.07473e-13	8.42083e-12
map-data-2021.01.25-17.48.04.912_0143.jpk-force	143	-1.28906e-06	-2.30469e-06	-6.77715e-09	1.0371e-05	7.91581e-12	-6.48077e-05	-3.77368e-11	-2.37473e-06	2.37098e-11	-2.47285e-06	-7.49555e-12	1.0672e-11
map-data-2021.01.25-17.48.04.912_0144.jpk-force	144	-1.21094e-06	-2.30469e-06	-6.79092e-09	1.01469e-05	3.74543e-14	-5.10468e-05	-2.13365e-11	-1.51158e-06	2.3555e-11	-1.46755e-06	-1.88083e-12	8.51789e-12
map-data-2021.01.25-17.48.04.912_0145.jpk-force	145	-1.13281e-06	-2.30469e-06	-6.76246e-09	1.02698e-05	2.31493e-11	-3.33048e-05	-5.35664e-11	-2.28322e-06	1.90661e-11	-2.16441e-06	-1.43221e-11	2.06387e-11
map-data-2021.01.25-17.48.04.912_0146.jpk-force	146	-1.05469e-06	-2.30469e-06	-6.76027e-09	1.02875e-05	8.97572e-12	-5.11611e-05	-4.73863e-11	-2.10866e-06	1.77555e-11	-2.2852e-06	-1.79471e-11	1.24381e-11
map-data-2021.01.25-17.48.04.912_0147.jpk-force	147	-9.76563e-07	-2.30469e-06	-6.78439e-09	1.07263e-05	3.42936e-12	-6.20187e-05	-1.58806e-11	-2.11121e-06	3.28622e-11	-2.2457e-06	1.03103e-11	8.78865e-12
map-data-2021.01.25-17.48.04.912_0148.jpk-force	148	-8.98437e-07	-2.30469e-06	-6.81223e-09	1.07777e-05	2.1151e-11	-6.03465e-05	-1.60674e-11	-1.10961e-06	1.98651e-11	-1.0896e-06	9.17019e-13	8.89085e-12
map-data-2021.01.25-17.48.04.912_0149.jpk-force	149	-8.20313e-07	-2.30469e-06	-6.79135e-09	1.1077e-05	2.08865e-11	-5.242e-05	-1.27038e-11	-1.09581e-06	1.96799e-11	-1.09147e-06	1.44403e-12	8.15119e-12
map-data-2021.01.25-17.48.04.912_0150.jpk-force	150	-7.42187e-07	-2.30469e-06	-6.79434e-09	1.11835e-05	2.75113e-12	-6.00894e-05	-1.70859e-11	-1.1082e-06	2.4198e-11	-1.08852e-06	-6.00146e-14	1.07465e-11
map-data-2021.01.25-17.48.04.912_0151.jpk-force	151	-6.64063e-07	-2.30469e-06	-6.83002e-09	1.12592e-05	2.6104e-11	-4.47484e-05	-4.13172e-11	-2.40253e-06	2.39477e-11	-2.36816e-06	-1.21774e-11	1.42548e-11
map-data-2021.01.25-17.48.04.912_0152.jpk-force	152	-5.85938e-07	-2.30469e-06	-6.82771e-09	1.08716e-05	2.0689e-11	-4.88687e-05	-3.95908e-12	-2.37061e-06	4.1626e-11	-2.43002e-06	1.78271e-11	1.0084e-11
map-data-2021.01.25-17.48.04.912_0153.jpk-force	153	-5.07813e-07	-2.30469e-06	-6.83387e-09	1.1136e-05	1.31235e-11	-5.79736e-05	-2.09613e-11	-2.42465e-06	1.3737e-11	-2.36691e-06	-3.28528e-12	6.37437e-12
map-data-2021.01.25-17.48.04.912_0154.jpk-force	154	-4.29688e-07	-2.30469e-06	-6.83657e-09	1.00789e-05	5.30426e-11	-2.72451e-05	-6.18913e-11	1.83269e-07	2.50826e-11	2.41627e-07	-1.28611e-11	2.49327e-11
map-data-2021.01.25-17.48.04.912_0155.jpk-force	155	-3.51563e-07	-2.30469e-06	-6.82657e-09	1.07665e-05	1.28525e-11	-5.18236e-05	-5.30362e-11	-9.01655e-07	1.40898e-11	-8.50634e-07	-2.34038e-11	1.47044e-11
map-data-2021.01.25-17.48.04.912_0156.jpk-force	156	-2.73438e-07	-2.30469e-06	-6.82607e-09	1.06724e-05	1.75479e-11	-4.58944e-05	-2.01537e-11	-2.35951e-07	1.81404e-11	-2.54627e-07	7.12111e-14	7.65992e-12
map-data-2021.01.25-17.48.04.912_0157.jpk-force	157	-1.95313e-07	-2.30469e-06	-6.87472e-09	1.01548e-05	3.33807e-11	-6.81312e-05	-6.10749e-11	-2.22809e-06	1.32906e-11	-2.1787e-06	-2.06687e-11	1.63872e-11
map-data-2021.01.25-17.48.04.912_0158.jpk-force	158	-1.17188e-07	-2.30469e-06	-6.883e-09	1.16824e-05	1.31414e-11	-5.16256e-05	-2.03092e-11	-2.22729e-06	2.14177e-11	-2.23129e-06	1.59585e-12	8.13712e-12
map-data-2021.01.25-17.48.04.912_0159.jpk-force	159	-3.90635e-08	-2.30469e-06	-6.90625e-09	1.20214e-05	3.14503e-11	-5.43335e-05	-1.15111e-11	-7.50444e-07	2.50391e-11	-7.84128e-07	3.86082e-12	7.72758e-12
map-data-2021.01.25-17.48.04.912_0160.jpk-force	160	3.90618e-08	-2.30469e-06	-6.90169e-09	1.07951e-05	6.9622e-11	-3.82457e-05	-4.08156e-11	-1.42196e-06	2.97517e-11	-1.38694e-06	-4.83697e-12	1.20164e-11
map-data-2021.01.25-17.48.04.912_0161.jpk-force	161	1.17188e-07	-2.30469e-06	-6.90385e-09	1.14782e-05	8.65649e-11	-4.07611e-05	-2.29582e-11	-1.44749e-06	2.49604e-11	-1.37744e-06	-2.48283e-12	1.02526e-11
map-data-2021.01.25-17.48.04.912_0162.jpk-force	162	1.95312e-07	-2.30469e-06	-6.90432e-09	1.20874e-05	1.72073e-11	-5.19398e-05	-4.05979e-11	-6.62423e-07	2.37544e-11	-4.74343e-07	-2.17157e-12	1.23731e-11
map-data-2021.01.25-17.48.04.912_0163.jpk-force	163	2.73438e-07	-2.30469e-06	-6.89597e-09	1.1555e-05	3.77925e-11	-4.8306e-05	-6.59386e-11	2.37664e-07	1.96018e-11	3.33708e-07	-2.38499e-11	2.18163e-11
map-data-2021.01.25-17.48.04.912_0164.jpk-force	164	3.51562e-07	-2.30469e-06	-6.90858e-09	1.19234e-05	2.35642e-11	-4.62435e-05	-8.19593e-12	-3.55874e-07	1.83748e-11	-3.72882e-07	9.48846e-13	7.1801e-12
map-data-2021.01.25-17.48.04.912_0165.jpk-force	165	4.29686e-07	-2.30469e-06	-6.90958e-09	1.20232e-05	1.53749e-11	-3.99242e-05	-1.70832e-11	-3.635e-07	5.99434e-12	-3.58164e-07	-3.18032e-12	6.48696e-12
map-data-2021.01.25-17.48.04.912_0166.jpk-force	166	5.07812e-07	-2.30469e-06	-6.92501e-09	1.20058e-05	1.36992e-11	-3.41941e-05	-8.01231e-12	-3.6345e-07	1.45898e-11	-3.68119e-07	3.06783e-12	6.40789e-12
map-data-2021.01.25-17.48.04.912_0167.jpk-force	167	5.85936e-07	-2.30469e-06	-6.95683e-09	1.12323e-05	2.07164e-11	-7.3356e-05	-1.9316e-11	-3.63947e-07	7.07872e-12	-3.68615e-07	-1.83899e-12	6.80603e-12
map-data-2021.01.25-17.48.04.912_0168.jpk-force	168	6.64062e-07	-2.30469e-06	-6.9143e-09	1.23212e-05	-2.22026e-13	-4.76316e-05	-5.03775e-11	-1.72013e-06	2.18054e-11	-1.65775e-06	-2.38651e-11	1.55158e-11
map-data-2021.01.25-17.48.04.912_0169.jpk-force	169	7.42187e-07	-2.30469e-06	-6.89295e-09	1.05476e-05	6.10441e-11	-3.77976e-05	-6.29776e-11	4.58917e-10	1.31326e-11	7.41603e-08	-2.26744e-11	2.23492e-11
map-data-2021.01.25-17.48.04.912_0170.jpk-force	170	8.20312e-07	-2.30469e-06	-6.88837e-09	1.0755e-05	7.0915e-11	-5.25641e-05	-1.51121e-11	7.2216e-07	8.37871e-12	7.41503e-07	-1.42152e-12	6.4082e-12
map-data-2021.01.25-17.48.04.912_0171.jpk-force	171	8.98437e-07	-2.30469e-06	-6.87499e-09	1.1703e-05	2.53302e-11	-1.7773e-05	-4.71352e-11	-1.3006e-06	2.38915e-11	-1.14918e-06	-9.73311e-12	1.51892e-11
map-data-2021.01.25-17.48.04.912_0172.jpk-force	172	9.76562e-07	-2.30469e-06	-6.94515e-09	1.17231e-05	-1.00881e-11	-8.04704e-05	-2.16496e-11	-1.18482e-06	1.64045e-11	-1.30887e-06	1.76651e-14	7.24148e-12
map-data-2021.01.25-17.48.04.912_0173.jpk-force	173	1.05469e-06	-2.30469e-06	-6.91541e-09	1.18482e-05	1.95994e-11	-4.98e-05	-4.09248e-11	-1.35295e-06	1.75509e-11	-1.3336e-06	-1.83622e-11	1.26131e-11
map-data-2021.01.25-17.48.04.912_0174.jpk-force	174	1.13281e-06	-2.30469e-06	-6.91818e-09	1.16678e-05	3.80797e-11	-1.89325e-05	-7.50439e-12	-1.344e-06	3.95863e-11	-1.45474e-06	2.03897e-11	8.7056e-12
map-data-2021.01.25-17.48.04.912_0175.jpk-force	175	1.21094e-06	-2.30469e-06	-6.95523e-09	1.14209e-05	5.48737e-11	-6.20028e-05	-1.70732e-11	-9.89495e-07	1.98254e-11	-9.985e-07	9.80224e-13	8.94416e-12
map-data-2021.01.25-17.48.04.912_0176.jpk-force	176	1.28906e-06	-2.30469e-06	-6.90904e-09	1.17564e-05	3.87414e-12	-5.18797e-05	-1.08968e-11	-1.00169e-06	2.01884e-11	-9.84346e-07	2.22998e-12	7.84991e-12
map-data-2021.01.25-17.48.04.912_0177.jpk-force	177	1.36719e-06	-2.30469e-06	-6.966e-09	1.16059e-05	2.58574e-11	-9.88623e-05	-7.28391e-11	-1.01561e-06	2.16574e-11	-9.97603e-07	-1.9418e-11	2.81596e-11
map-data-2021.01.25-17.48.04.912_0178.jpk-force	178	1.44531e-06	-2.30469e-06	-6.94604e-09	1.1242e-05	2.47612e-11	-7.65042e-05	-1.37062e-11	-1.29099e-06	1.72097e-11	-1.20293e-06	-1.70665e-13	7.27572e-12
map-data-2021.01.25-17.48.04.912_0179.jpk-force	179	1.52344e-06	-2.30469e-06	-6.93864e-09	1.2145e-05	3.63026e-12	-5.6566e-05	-2.02454e-11	-1.2774e-06	1.41669e-11	-1.30842e-06	-1.39648e-12	7.36546e-12
map-data-2021.01.25-17.48.04.912_0180.jpk-force	180	1.60156e-06	-2.30469e-06	-6.93657e-09	1.17972e-05	1.0978e-11	-5.56075e-05	-1.89016e-11	-1.27651e-06	1.96011e-11	-1.21948e-06	-4.2942e-13	8.77132e-12
map-data-2021.01.25-17.48.04.912_0181.jpk-force	181	1.67969e-06	-2.30469e-06	-6.98862e-09	1.16211e-05	-4.24707e-11	-0.000110931	-5.27312e-11	-2.15998e-06	1.94059e-11	-2.1423e-06	-8.4031e-12	1.69194e-11
map-data-2021.01.25-17.48.04.912_0182.jpk-force	182	1.75781e-06	-2.30469e-06	-6.97618e-09	1.15806e-05	-1.29212e-10	-0.000151229	-4.7499e-11	-2.30479e-06	1.74435e-11	-2.29044e-06	-1.70302e-11	1.54089e-11
map-data-2021.01.25-17.48.04.912_0183.jpk-force	183	1.83594e-06	-2.30469e-06	-6.9368e-09	1.11726e-05	4.79229e-11	-5.10274e-05	-5.28188e-11	1.54198e-07	1.13213e-11	1.8788e-07	-2.86382e-11	1.75547e-11
map-data-2021.01.25-17.48.04.912_0184.jpk-force	184	1.91406e-06	-2.30469e-06	-6.89586e-09	1.13407e-05	1.81661e-11	-2.4168e-05	-1.93526e-11	1.82871e-07	1.84558e-11	1.26846e-07	-5.70413e-13	8.07531e-12
map-data-2021.01.25-17.48.04.912_0185.jpk-force	185	1.99219e-06	-2.30469e-06	-6.9174e-09	1.13103e-05	9.85637e-12	-5.40084e-05	-4.08093e-11	-1.60327e-06	1.57833e-11	-1.56824e-06	-1.23792e-11	1.03935e-11
map-data-2021.01.25-17.48.04.912_0186.jpk-force	186	2.07031e-06	-2.30469e-06	-6.92632e-09	1.14781e-05	8.82821e-12	-5.3185e-05	-1.83454e-11	-1.07888e-06	1.65036e-11	-1.13591e-06	4.22374e-13	8.20239e-12
map-data-2021.01.25-17.48.04.912_0187.jpk-force	187	2.14844e-06	-2.30469e-06	-6.93655e-09	1.17165e-05	-2.54726e-11	-7.13482e-05	-3.16027e-11	-2.01989e-06	2.16228e-11	-1.98686e-06	-7.02226e-12	1.07674e-11
map-data-2021.01.25-17.48.04.912_0188.jpk-force	188	2.22656e-06	-2.30469e-06	-6.97131e-09	1.19198e-05	2.12162e-11	-5.18725e-05	-2.25656e-11	-1.95446e-06	2.17785e-11	-2.03987e-06	-6.03521e-13	8.58991e-12
map-data-2021.01.25-17.48.04.912_0189.jpk-force	189	2.30469e-06	-2.30469e-06	-6.94717e-09	1.15944e-05	3.66506e-11	-4.38945e-05	-1.78812e-11	-2.00525e-06	3.30193e-11	-2.13106e-06	1.10227e-11	9.41495e-12
map-data-2021.01.25-17.48.04.912_0190.jpk-force	190	2.38281e-06	-2.30469e-06	-6.93225e-09	1.18358e-05	-1.2755e-10	-0.000105709	-6.28022e-11	-2.68232e-06	1.26676e-11	-2.62826e-06	-2.11323e-11	2.14487e-11
map-data-2021.01.25-17.48.04.912_0191.jpk-force	191	2.46094e-06	-2.30469e-06	-6.92176e-09	1.17746e-05	1.67015e-11	-4.20203e-05	-2.09137e-11	-1.55002e-06	1.83697e-11	-1.47731e-06	-1.14822e-12	8.2374e-12
map-data-2021.01.25-17.48.04.912_0192.jpk-force	192	2.46094e-06	-2.22656e-06	-6.92957e-09	1.14584e-05	1.60257e-11	-4.90162e-05	-1.82073e-11	-1.38361e-06	2.00327e-11	-1.40096e-06	-1.04719e-12	7.78064e-12
map-data-2021.01.25-17.48.04.912_0193.jpk-force	193	2.38281e-06	-2.22656e-06	-6.94566e-09	1.20776e-05	2.88164e-12	-5.81624e-05	-1.59652e-11	-1.4205e-06	1.31149e-11	-1.39448e-06	-1.00247e-12	6.86298e-12
map-data-2021.01.25-17.48.04.912_0194.jpk-force	194	2.30469e-06	-2.22656e-06	-6.98444e-09	1.19692e-05	9.28221e-12	-5.51074e-05	-5.96012e-11	-2.09557e-06	2.30537e-11	-2.02317e-06	-2.34991e-11	1.72665e-11
map-data-2021.01.25-17.48.04.912_0195.jpk-force	195	2.22656e-06	-2.22656e-06	-6.97882e-09	1.19633e-05	8.77026e-12	-5.25994e-05	-1.80135e-11	-2.1668e-06	2.39586e-11	-2.11774e-06	2.43175e-12	7.52497e-12
map-data-2021.01.25-17.48.04.912_0196.jpk-force	196	2.14844e-06	-2.22656e-06	-6.93239e-09	1.18827e-05	2.69902e-11	-4.33548e-05	-1.96887e-11	-1.74606e-06	2.18668e-11	-1.76541e-06	1.32487e-12	9.95005e-12
map-data-2021.01.25-17.48.04.912_0197.jpk-force	197	2.07031e-06	-2.22656e-06	-6.97605e-09	1.16238e-05	6.08488e-11	-3.42267e-05	-1.37998e-11	-1.40295e-06	1.16676e-11	-1.41162e-06	2.9416e-13	6.65683e-12
map-data-2021.01.25-17.48.04.912_0198.jpk-force	198	1.99219e-06	-2.22656e-06	-6.99217e-09	1.16766e-05	-2.1438e-11	-6.99606e-05	-6.59567e-12	-1.4291e-06	2.45401e-11	-1.40908e-06	4.51837e-12	7.79327e-12
map-data-2021.01.25-17.48.04.912_0199.jpk-force	199	1.91406e-06	-2.22656e-06	-6.98166e-09	1.09665e-05	3.27424e-11	-4.67719e-05	-1.61798e-11	-1.42057e-06	1.85248e-11	-1.41589e-06	1.9332e-12	7.96867e-12
map-data-2021.01.25-17.48.04.912_0200.jpk-force	200	1.83594e-06	-2.22656e-06	-6.98549e-09	1.16285e-05	2.27306e-11	-4.05024e-05	-1.75326e-11	-1.40678e-06	1.92474e-11	-1.42446e-06	4.13e-12	9.97145e-12
map-data-2021.01.25-17.48.04.912_0201.jpk-force	201	1.75781e-06	-2.22656e-06	-6.96732e-09	1.15286e-05	1.49838e-11	-4.48252e-05	-2.67291e-11	-1.41912e-06	2.01935e-11	-1.42413e-06	-3.36917e-13	1.09948e-11
map-data-2021.01.25-17.48.04.912_0202.jpk-force	202	1.67969e-06	-2.22656e-06	-6.97328e-09	1.12989e-05	3.13151e-11	-3.98753e-05	-1.60833e-11	-1.42032e-06	1.87974e-11	-1.42466e-06	1.81175e-12	1.0197e-11
map-data-2021.01.25-17.48.04.912_0203.jpk-force	203	1.60156e-06	-2.22656e-06	-6.97793e-09	1.0661e-05	4.89427e-11	-5.30343e-05	-1.4342e-11	-1.27787e-06	1.86839e-11	-1.27286e-06	2.81583e-12	1.00924e-11
map-data-2021.01.25-17.48.04.912_0204.jpk-force	204	1.52344e-06	-2.22656e-06	-6.96877e-09	1.14198e-05	9.94846e-12	-5.00462e-05	-1.1554e-11	-7.55013e-07	1.3357e-11	-7.22666e-07	7.10651e-13	6.37543e-12
map-data-2021.01.25-17.48.04.912_0205.jpk-force	205	1.44531e-06	-2.22656e-06	-6.98841e-09	1.14316e-05	1.56471e-11	-4.79752e-05	-5.72843e-11	-1.34319e-06	1.83371e-11	-1.27216e-06	-2.31881e-11	1.81655e-11
map-data-2021.01.25-17.48.04.912_0206.jpk-force	206	1.36719e-06	-2.22656e-06	-6.96425e-09	1.1339e-05	-1.05541e-11	-5.89575e-05	-4.97361e-11	-2.30361e-06	1.70138e-11	-2.20682e-06	-1.57619e-11	1.83065e-11
map-data-2021.01.25-17.48.04.912_0207.jpk-force	207	1.28906e-06	-2.22656e-06	-6.97071e-09	1.11594e-05	-9.1016e-12	-6.32907e-05	-3.03022e-11	-2.38414e-06	2.23241e-11	-2.36579e-06	-4.8422e-12	1.16685e-11
map-data-2021.01.25-17.48.04.912_0208.jpk-force	208	1.21094e-06	-2.22656e-06	-6.96818e-09	1.1222e-05	-1.64238e-11	-6.68373e-05	-1.88372e-11	-2.37055e-06	2.5905e-11	-2.41227e-06	1.36194e-12	9.42314e-12
map-data-2021.01.25-17.48.04.912_0209.jpk-force	209	1.13281e-06	-2.22656e-06	-6.9739e-09	1.09885e-05	-4.39171e-11	-7.96807e-05	-1.97201e-11	-1.91593e-06	1.79684e-11	-1.92194e-06	-1.20599e-12	9.13354e-12
map-data-2021.01.25-17.48.04.912_0210.jpk-force	210	1.05469e-06	-2.22656e-06	-6.96641e-09	1.12674e-05	-4.62771e-11	-8.15232e-05	-2.03812e-11	-1.91379e-06	2.171e-11	-1.90912e-06	1.0899e-12	8.69594e-12
map-data-2021.01.25-17.48.04.912_0211.jpk-force	211	9.76563e-07	-2.22656e-06	-6.97363e-09	1.11779e-05	-2.36603e-11	-7.09413e-05	-1.38909e-11	-1.93107e-06	2.32334e-11	-1.87168e-06	1.83293e-12	7.01591e-12
map-data-2021.01.25-17.48.04.912_0212.jpk-force	212	8.98437e-07	-2.22656e-06	-7.00372e-09	1.17663e-05	1.41486e-11	-5.2195e-05	-1.61249e-11	-1.92663e-06	2.28717e-11	-1.91963e-06	-3.20407e-13	8.47304e-12
map-data-2021.01.25-17.48.04.912_0213.jpk-force	213	8.20312e-07	-2.22656e-06	-7.00441e-09	1.13501e-05	1.43957e-11	-4.39326e-05	-2.14215e-11	-1.25294e-06	1.41191e-11	-1.28496e-06	-3.88633e-12	8.88204e-12
map-data-2021.01.25-17.48.04.912_0214.jpk-force	214	7.42187e-07	-2.22656e-06	-7.00741e-09	1.14467e-05	1.54878e-11	-5.17653e-05	-5.42098e-11	-1.79765e-06	1.74228e-11	-1.74994e-06	-1.95988e-11	1.54417e-11
map-data-2021.01.25-17.48.04.912_0215.jpk-force	215	6.64062e-07	-2.22656e-06	-6.99783e-09	1.13328e-05	1.93577e-11	-4.75666e-05	-1.78239e-11	-9.25572e-07	1.61848e-11	-9.31575e-07	-5.68362e-13	1.0127e-11
map-data-2021.01.25-17.48.04.912_0216.jpk-force	216	5.85938e-07	-2.22656e-06	-7.00964e-09	1.13123e-05	1.66883e-11	-3.86809e-05	-8.49948e-12	-9.35722e-07	1.12673e-11	-9.32053e-07	-1.04756e-12	5.75153e-12
map-data-2021.01.25-17.48.04.912_0217.jpk-force	217	5.07813e-07	-2.22656e-06	-6.99492e-09	1.10955e-05	1.23764e-11	-4.39967e-05	-4.11942e-11	-1.60339e-06	1.14198e-11	-1.59939e-06	-1.58618e-11	1.07609e-11
map-data-2021.01.25-17.48.04.912_0218.jpk-force	218	4.29687e-07	-2.22656e-06	-7.01706e-09	1.10996e-05	1.54098e-11	-5.92525e-05	-1.9327e-11	-7.29116e-07	1.74665e-11	-7.61796e-07	1.94856e-12	7.98068e-12
map-data-2021.01.25-17.48.04.912_0219.jpk-force	219	3.51563e-07	-2.22656e-06	-7.00483e-09	1.09616e-05	1.56722e-12	-6.01883e-05	-4.94946e-11	-2.36956e-06	2.2277e-11	-2.2968e-06	-1.98549e-11	1.7535e-11
map-data-2021.01.25-17.48.04.912_0220.jpk-force	220	2.73438e-07	-2.22656e-06	-6.98944e-09	1.09353e-05	2.46598e-11	-4.66505e-05	-5.14057e-11	-1.04036e-06	1.52222e-11	-9.54981e-07	-1.40097e-11	1.65902e-11
map-data-2021.01.25-17.48.04.912_0221.jpk-force	221	1.95312e-07	-2.22656e-06	-7.00471e-09	1.07067e-05	1.8921e-11	-7.79535e-05	-5.87334e-11	-1.06416e-06	1.1029e-11	-1.03514e-06	-1.20513e-11	1.55313e-11
map-data-2021.01.25-17.48.04.912_0222.jpk-force	222	1.17187e-07	-2.22656e-06	-7.01136e-09	9.71535e-06	7.91841e-11	-4.38218e-05	-1.20028e-11	1.14962e-06	1.73546e-11	1.16829e-06	1.63863e-12	7.87003e-12
map-data-2021.01.25-17.48.04.912_0223.jpk-force	223	3.90618e-08	-2.22656e-06	-7.05904e-09	1.01197e-05	5.41486e-11	-3.60232e-05	-1.69574e-11	1.15589e-06	1.1481e-11	1.13721e-06	-5.49431e-12	6.72655e-12
map-data-2021.01.25-17.48.04.912_0224.jpk-force	224	-3.90623e-08	-2.22656e-06	-7.08068e-09	1.24175e-05	1.36472e-11	-4.78665e-05	-1.85309e-11	-4.54697e-07	2.1482e-11	-4.62034e-07	4.99561e-13	8.37852e-12
map-data-2021.01.25-17.48.04.912_0225.jpk-force	225	-1.17187e-07	-2.22656e-06	-7.0615e-09	1.1947e-05	-8.55982e-12	-6.90947e-05	-5.31276e-11	-1.70153e-06	1.53579e-11	-1.65916e-06	-1.8325e-11	1.76124e-11
map-data-2021.01.25-17.48.04.912_0226.jpk-force	226	-1.95313e-07	-2.22656e-06	-7.08195e-09	1.18061e-05	1.73963e-11	-4.76925e-05	-3.76639e-11	-6.9062e-07	2.13835e-11	-5.25884e-07	-1.23854e-11	1.24862e-11
map-data-2021.01.25-17.48.04.912_0227.jpk-force	227	-2.73438e-07	-2.22656e-06	-7.0641e-09	1.12103e-05	-4.61534e-13	-6.86925e-05	-1.59259e-11	-8.8367e-07	1.46752e-11	-8.76665e-07	-2.64121e-12	6.41408e-12
map-data-2021.01.25-17.48.04.912_0228.jpk-force	228	-3.51563e-07	-2.22656e-06	-7.0679e-09	1.18894e-05	-2.26531e-11	-5.36389e-05	-1.50634e-11	-8.88357e-07	2.04258e-11	-8.93359e-07	5.88571e-12	7.57465e-12
map-data-2021.01.25-17.48.04.912_0229.jpk-force	229	-4.29688e-07	-2.22656e-06	-7.06676e-09	1.1935e-05	3.677e-12	-5.79072e-05	-1.21088e-11	-8.95543e-07	1.25297e-11	-8.76202e-07	7.85026e-13	5.63573e-12
map-data-2021.01.25-17.48.04.912_0230.jpk-force	230	-5.07813e-07	-2.22656e-06	-7.09466e-09	1.20663e-05	2.75002e-12	-6.19339e-05	-1.17551e-11	-9.00986e-07	2.05911e-11	-9.06989e-07	2.39218e-12	7.00642e-12
map-data-2021.01.25-17.48.04.912_0231.jpk-force	231	-5.85938e-07	-2.22656e-06	-7.10128e-09	1.19809e-05	-8.22279e-12	-6.26693e-05	-1.49234e-11	-8.74609e-07	2.23294e-11	-9.07623e-07	5.92538e-12	8.94983e-12
map-data-2021.01.25-17.48.04.912_0232.jpk-force	232	-6.64063e-07	-2.22656e-06	-7.06732e-09	1.18234e-05	1.91026e-11	-4.76819e-05	-1.72665e-11	-8.98295e-07	1.40517e-11	-8.77953e-07	-1.48483e-12	7.09505e-12
map-data-2021.01.25-17.48.04.912_0233.jpk-force	233	-7.42187e-07	-2.22656e-06	-7.07634e-09	1.21879e-05	-1.25297e-11	-6.36849e-05	-4.39654e-12	-8.97102e-07	3.34249e-11	-9.0644e-07	1.64816e-11	9.79801e-12
map-data-2021.01.25-17.48.04.912_0234.jpk-force	234	-8.20313e-07	-2.22656e-06	-7.10349e-09	1.20194e-05	1.7188e-11	-4.95421e-05	-4.00804e-11	-5.61259e-07	1.94327e-11	-3.97516e-07	-1.46563e-11	1.10673e-11
map-data-2021.01.25-17.48.04.912_0235.jpk-force	235	-8.98437e-07	-2.22656e-06	-7.05329e-09	1.14266e-05	-2.34727e-12	-6.11598e-05	-8.55768e-12	-6.37566e-07	3.58322e-11	-3.82455e-07	1.16677e-11	8.32569e-12
map-data-2021.01.25-17.48.04.912_0236.jpk-force	236	-9.76563e-07	-2.22656e-06	-7.06806e-09	1.15095e-05	-7.15681e-12	-6.25369e-05	-1.1605e-11	-5.86124e-07	3.07869e-11	-4.89415e-07	9.61224e-12	7.76162e-12
map-data-2021.01.25-17.48.04.912_0237.jpk-force	237	-1.05469e-06	-2.22656e-06	-7.0351e-09	1.10996e-05	5.3558e-13	-5.38125e-05	-1.79285e-11	-6.36586e-07	2.8694e-11	-4.65514e-07	7.15743e-12	8.22581e-12
map-data-2021.01.25-17.48.04.912_0238.jpk-force	238	-1.13281e-06	-2.22656e-06	-7.12544e-09	1.15134e-05	-1.13631e-10	-0.000136309	-5.66955e-11	-1.91171e-06	1.37339e-11	-1.87734e-06	-2.37198e-11	1.95838e-11
map-data-2021.01.25-17.48.04.912_0239.jpk-force	239	-1.21094e-06	-2.22656e-06	-7.08288e-09	1.19197e-05	1.32479e-11	-3.27039e-05	-1.70046e-11	-1.93855e-06	2.10916e-11	-1.93154e-06	-9.29419e-16	7.79067e-12
map-data-2021.01.25-17.48.04.912_0240.jpk-force	240	-1.28906e-06	-2.22656e-06	-7.07438e-09	1.16355e-05	-7.11507e-11	-8.79127e-05	-1.99537e-11	-1.9144e-06	1.81039e-11	-1.97212e-06	-1.55889e-13	8.23639e-12
map-data-2021.01.25-17.48.04.912_0241.jpk-force	241	-1.36719e-06	-2.22656e-06	-7.12123e-09	1.12245e-05	1.77265e-11	-7.23558e-05	-1.72842e-11	-1.8759e-06	2.92117e-11	-1.92228e-06	3.22157e-12	8.72922e-12
map-data-2021.01.25-17.48.04.912_0242.jpk-force	242	-1.44531e-06	-2.22656e-06	-7.13853e-09	1.2573e-05	3.51402e-11	-4.74208e-05	-1.79096e-11	-1.93868e-06	1.98547e-11	-1.97038e-06	6.83524e-13	8.26832e-12
map-data-2021.01.25-17.48.04.912_0243.jpk-force	243	-1.52344e-06	-2.22656e-06	-7.07238e-09	1.15687e-05	1.41692e-11	-4.81267e-05	-1.84151e-11	-1.14636e-06	1.74375e-11	-1.17904e-06	-4.39161e-13	8.73785e-12
map-data-2021.01.25-17.48.04.912_0244.jpk-force	244	-1.60156e-06	-2.22656e-06	-7.0754e-09	1.10562e-05	1.66279e-11	-5.40173e-05	-4.33547e-11	-1.88873e-06	1.63854e-11	-1.81766e-06	-1.28194e-11	1.21584e-11
map-data-2021.01.25-17.48.04.912_0245.jpk-force	245	-1.67969e-06	-2.22656e-06	-7.16609e-09	1.07595e-05	4.9238e-11	-3.69651e-05	-5.87875e-11	5.48896e-08	3.14671e-11	1.40925e-07	-1.92141e-11	2.40971e-11
map-data-2021.01.25-17.48.04.912_0246.jpk-force	246	-1.75781e-06	-2.22656e-06	-7.18638e-09	1.20377e-05	1.08451e-11	-6.11369e-05	-2.09561e-11	-9.42319e-07	1.33697e-11	-9.6066e-07	-6.35974e-12	7.30724e-12
map-data-2021.01.25-17.48.04.912_0247.jpk-force	247	-1.83594e-06	-2.22656e-06	-7.19968e-09	1.20461e-05	-4.693e-13	-8.92497e-05	-5.47377e-11	-2.20048e-06	4.78931e-12	-2.12807e-06	-2.39533e-11	1.37883e-11
map-data-2021.01.25-17.48.04.912_0248.jpk-force	248	-1.91406e-06	-2.22656e-06	-7.18254e-09	1.3163e-05	1.19891e-11	-5.49636e-05	-2.21386e-11	-1.79823e-06	1.49528e-11	-1.80723e-06	-1.58233e-12	1.10782e-11
map-data-2021.01.25-17.48.04.912_0249.jpk-force	249	-1.99219e-06	-2.22656e-06	-7.20681e-09	1.09892e-05	2.13784e-11	-5.70084e-05	-1.28703e-11	-6.74788e-07	7.72723e-12	-6.7879e-07	-1.79009e-12	5.81081e-12
map-data-2021.01.25-17.48.04.912_0250.jpk-force	250	-2.07031e-06	-2.22656e-06	-7.12332e-09	1.13478e-05	1.5556e-11	-4.37652e-05	-1.81703e-11	-6.75675e-07	1.42909e-11	-6.7034e-07	-3.93818e-12	8.47448e-12
map-data-2021.01.25-17.48.04.912_0251.jpk-force	251	-2.14844e-06	-2.22656e-06	-7.08745e-09	1.13974e-05	1.56969e-11	-4.77897e-05	-1.36164e-11	-6.80638e-07	1.56467e-11	-6.85974e-07	-8.67244e-13	7.42193e-12
map-data-2021.01.25-17.48.04.912_0252.jpk-force	252	-2.22656e-06	-2.22656e-06	-7.088e-09	1.13797e-05	2.45245e-11	-4.29338e-05	-1.28403e-11	-6.74736e-07	1.64257e-11	-6.69401e-07	2.49228e-12	6.327e-12
map-data-2021.01.25-17.48.04.912_0253.jpk-force	253	-2.30469e-06	-2.22656e-06	-7.09637e-09	1.07361e-05	1.96581e-11	-4.12529e-05	-1.29118e-11	-6.60739e-07	2.38544e-11	-6.69743e-07	3.75599e-12	1.03718e-11
map-data-2021.01.25-17.48.04.912_0254.jpk-force	254	-2.38281e-06	-2.22656e-06	-7.08488e-09	1.09916e-05	1.79776e-11	-4.24844e-05	-1.18819e-11	-6.63214e-07	1.64019e-11	-6.71218e-07	3.28577e-12	7.61881e-12
map-data-2021.01.25-17.48.04.912_0255.jpk-force	255	-2.46094e-06	-2.22656e-06	-7.07333e-09	1.03621e-05	2.79996e-11	-5.30319e-05	-3.56112e-11	-9.29311e-07	2.07628e-11	-8.91289e-07	-1.21976e-11	1.25989e-11
map-data-2021.01.25-17.48.04.912_0256.jpk-force	256	-2.46094e-06	-2.14844e-06	-7.08354e-09	1.08637e-05	1.88232e-11	-3.42136e-05	-1.79143e-11	-1.01469e-06	2.39101e-11	-1.01002e-06	1.22897e-12	8.02955e-12
map-data-2021.01.25-17.48.04.912_0257.jpk-force	257	-2.38281e-06	-2.14844e-06	-7.07315e-09	1.08736e-05	1.29794e-11	-4.81389e-05	-1.88062e-11	-9.47328e-07	2.1643e-11	-9.68003e-07	1.5919e-12	8.24934e-12
map-data-2021.01.25-17.48.04.912_0258.jpk-force	258	-2.30469e-06	-2.14844e-06	-7.08675e-09	1.09998e-05	1.33473e-11	-4.75155e-05	-1.88657e-11	-1.01404e-06	2.72358e-11	-9.94366e-07	1.29556e-12	8.40082e-12
map-data-2021.01.25-17.48.04.912_0259.jpk-force	259	-2.22656e-06	-2.14844e-06	-7.06467e-09	1.01561e-05	-3.6837e-11	-0.00010934	-1.58229e-11	-1.22931e-06	2.22447e-11	-1.21796e-06	-1.82311e-12	9.46119e-12
map-data-2021.01.25-17.48.04.912_0260.jpk-force	260	-2.14844e-06	-2.14844e-06	-7.03175e-09	1.05746e-05	-1.29525e-10	-0.000119803	-4.19185e-11	-2.29554e-06	2.61865e-11	-2.132e-06	-4.34204e-12	1.30171e-11
map-data-2021.01.25-17.48.04.912_0261.jpk-force	261	-2.07031e-06	-2.14844e-06	-7.04917e-09	1.05359e-05	-8.1195e-11	-0.000114383	-1.92061e-11	-2.17479e-06	2.03841e-11	-2.28426e-06	4.06208e-13	8.34932e-12
map-data-2021.01.25-17.48.04.912_0262.jpk-force	262	-1.99219e-06	-2.14844e-06	-7.14587e-09	1.09882e-05	1.47534e-11	-6.02394e-05	-2.594e-11	-2.3507e-07	1.16651e-11	-2.39405e-07	-3.63008e-12	1.06309e-11
map-data-2021.01.25-17.48.04.912_0263.jpk-force	263	-1.91406e-06	-2.14844e-06	-7.09144e-09	1.10153e-05	1.36667e-11	-4.31597e-05	-1.75098e-11	-2.34377e-07	8.29913e-12	-2.38712e-07	-2.4476e-12	7.85333e-12
map-data-2021.01.25-17.48.04.912_0264.jpk-force	264	-1.83594e-06	-2.14844e-06	-7.13877e-09	1.06864e-05	1.72994e-11	-2.926e-05	-2.58038e-13	-2.32952e-07	1.91904e-11	-2.37954e-07	9.1266e-12	5.35591e-12
map-data-2021.01.25-17.48.04.912_0265.jpk-force	265	-1.75781e-06	-2.14844e-06	-7.12632e-09	1.06564e-05	5.47752e-11	-5.6854e-05	-5.08191e-11	-1.60315e-06	2.20415e-11	-1.53039e-06	-1.93096e-11	1.69897e-11
map-data-2021.01.25-17.48.04.912_0266.jpk-force	266	-1.67969e-06	-2.14844e-06	-7.17189e-09	1.10577e-05	-3.38842e-12	-5.62363e-05	-7.70267e-11	-2.20089e-06	8.19716e-13	-2.12881e-06	-3.77697e-11	2.16723e-11
map-data-2021.01.25-17.48.04.912_0267.jpk-force	267	-1.60156e-06	-2.14844e-06	-7.24277e-09	1.14178e-05	-5.05536e-11	-0.00011294	-9.8687e-12	-2.14883e-06	2.66441e-11	-2.14449e-06	1.00398e-11	8.54147e-12
map-data-2021.01.25-17.48.04.912_0268.jpk-force	268	-1.52344e-06	-2.14844e-06	-7.1465e-09	1.16172e-05	1.6951e-11	-5.40275e-05	-6.65876e-11	-1.58025e-06	2.80062e-11	-1.36178e-06	-2.62264e-11	2.25565e-11
map-data-2021.01.25-17.48.04.912_0269.jpk-force	269	-1.44531e-06	-2.14844e-06	-7.18814e-09	1.12635e-05	2.17717e-11	-4.50216e-05	-1.3346e-11	-1.40452e-06	5.23458e-11	-1.67337e-06	1.42592e-11	1.14173e-11
map-data-2021.01.25-17.48.04.912_0270.jpk-force	270	-1.36719e-06	-2.14844e-06	-7.27551e-09	1.19066e-05	7.92545e-11	-5.26594e-05	-1.57245e-11	-1.8905e-06	1.67367e-11	-1.88049e-06	-1.23572e-12	8.654e-12
map-data-2021.01.25-17.48.04.912_0271.jpk-force	271	-1.28906e-06	-2.14844e-06	-7.17647e-09	1.24625e-05	2.15969e-11	-5.02475e-05	-1.54541e-11	-1.891e-06	2.91324e-11	-1.91036e-06	1.79256e-12	1.03113e-11
map-data-2021.01.25-17.48.04.912_0272.jpk-force	272	-1.21094e-06	-2.14844e-06	-7.14658e-09	1.09372e-05	3.51504e-11	-6.08155e-05	-1.57499e-11	-1.91314e-06	1.66918e-11	-1.93183e-06	1.65433e-12	7.71282e-12
map-data-2021.01.25-17.48.04.912_0273.jpk-force	273	-1.13281e-06	-2.14844e-06	-7.10561e-09	1.08727e-05	5.51302e-12	-6.03846e-05	-1.86037e-11	-1.88241e-06	2.58922e-11	-1.93146e-06	-2.99178e-13	8.68871e-12
map-data-2021.01.25-17.48.04.912_0274.jpk-force	274	-1.05469e-06	-2.14844e-06	-7.14982e-09	1.10278e-05	6.4385e-12	-8.15653e-05	-4.8017e-11	-2.46067e-06	1.00099e-11	-2.4333e-06	-2.12552e-11	1.4878e-11
map-data-2021.01.25-17.48.04.912_0275.jpk-force	275	-9.76563e-07	-2.14844e-06	-7.18676e-09	1.17961e-05	4.39656e-11	-6.67286e-05	-1.49395e-11	-1.61796e-06	1.69514e-11	-1.6133e-06	1.67105e-12	7.78798e-12
map-data-2021.01.25-17.48.04.912_0276.jpk-force	276	-8.98437e-07	-2.14844e-06	-7.18075e-09	1.18387e-05	1.89686e-11	-6.68549e-05	-1.18881e-11	-1.62725e-06	1.42919e-11	-1.63192e-06	-8.40763e-13	6.57021e-12
map-data-2021.01.25-17.48.04.912_0277.jpk-force	277	-8.20313e-07	-2.14844e-06	-7.11941e-09	1.13259e-05	2.80594e-11	-4.75795e-05	-1.80218e-11	-1.62712e-06	1.64392e-11	-1.62245e-06	-2.07116e-12	8.1782e-12
map-data-2021.01.25-17.48.04.912_0278.jpk-force	278	-7.42187e-07	-2.14844e-06	-7.2949e-09	1.0777e-05	5.89101e-11	-8.10521e-05	-3.89318e-11	-1.26041e-06	2.24934e-11	-1.24307e-06	-6.04318e-12	1.65987e-11
map-data-2021.01.25-17.48.04.912_0279.jpk-force	279	-6.64063e-07	-2.14844e-06	-7.22762e-09	1.00367e-05	8.43641e-11	-5.69394e-05	-1.83405e-11	6.77711e-07	1.2021e-11	7.11393e-07	-2.72591e-12	8.20441e-12
map-data-2021.01.25-17.48.04.912_0280.jpk-force	280	-5.85938e-07	-2.14844e-06	-7.18142e-09	1.1362e-05	5.38599e-11	-4.93785e-05	-1.84113e-11	-2.14805e-06	2.00501e-11	-2.11335e-06	-9.73535e-13	7.56476e-12
map-data-2021.01.25-17.48.04.912_0281.jpk-force	281	-5.07813e-07	-2.14844e-06	-7.17767e-09	1.17126e-05	4.88215e-11	-4.85145e-05	-9.06289e-12	-2.13357e-06	2.36902e-11	-2.11521e-06	5.34947e-12	8.27984e-12
map-data-2021.01.25-17.48.04.912_0282.jpk-force	282	-4.29688e-07	-2.14844e-06	-7.14989e-09	1.13713e-05	1.84222e-11	-5.92797e-05	-8.24411e-11	-1.1838e-06	-5.48656e-12	-1.14945e-06	-5.13771e-11	1.55925e-11
map-data-2021.01.25-17.48.04.912_0283.jpk-force	283	-3.51563e-07	-2.14844e-06	-7.24704e-09	1.17987e-05	1.79162e-11	-7.28278e-05	-9.63666e-12	-1.19677e-06	2.69701e-11	-1.23979e-06	6.3998e-12	8.68925e-12
map-data-2021.01.25-17.48.04.912_0284.jpk-force	284	-2.73438e-07	-2.14844e-06	-7.1861e-09	1.23504e-05	1.66033e-11	-4.32496e-05	-1.16366e-11	-1.1933e-06	2.34124e-11	-1.17529e-06	2.44222e-12	7.00128e-12
map-data-2021.01.25-17.48.04.912_0285.jpk-force	285	-1.95313e-07	-2.14844e-06	-7.12954e-09	9.19233e-06	1.12098e-10	-5.47439e-05	-8.36995e-11	1.12223e-06	1.13964e-11	1.24795e-06	-4.9563e-11	2.41537e-11
map-data-2021.01.25-17.48.04.912_0286.jpk-force	286	-1.17188e-07	-2.14844e-06	-7.14527e-09	9.87046e-06	6.15377e-11	-5.63994e-05	-8.84051e-11	-6.14088e-07	1.86742e-11	-5.42032e-07	-3.93752e-11	2.71884e-11
map-data-2021.01.25-17.48.04.912_0287.jpk-force	287	-3.90635e-08	-2.14844e-06	-7.2483e-09	1.13767e-05	2.97499e-11	-9.28578e-05	-1.45384e-11	-1.10426e-06	1.76637e-11	-1.11493e-06	2.35654e-12	9.26234e-12
map-data-2021.01.25-17.48.04.912_0288.jpk-force	288	3.90618e-08	-2.14844e-06	-7.13434e-09	1.13047e-05	1.59766e-11	-4.05695e-05	-7.82569e-12	-5.82904e-07	1.48735e-11	-5.88907e-07	3.29841e-12	6.61729e-12
map-data-2021.01.25-17.48.04.912_0289.jpk-force	289	1.17188e-07	-2.14844e-06	-7.17693e-09	1.01807e-05	9.41646e-11	-5.0468e-05	-1.85996e-11	8.72305e-07	2.37285e-11	8.5363e-07	2.24505e-12	8.60836e-12
map-data-2021.01.25-17.48.04.912_0290.jpk-force	290	1.95312e-07	-2.14844e-06	-7.20401e-09	1.24016e-05	1.96703e-11	-5.50039e-05	-1.53793e-11	-9.713e-07	9.78918e-12	-9.67632e-07	-4.14924e-13	6.30087e-12
map-data-2021.01.25-17.48.04.912_0291.jpk-force	291	2.73438e-07	-2.14844e-06	-7.2176e-09	1.12312e-05	2.82791e-11	-4.92729e-05	-1.53545e-11	-2.7239e-07	1.47427e-11	-2.77726e-07	1.40689e-12	8.32499e-12
map-data-2021.01.25-17.48.04.912_0292.jpk-force	292	3.51562e-07	-2.14844e-06	-7.19124e-09	1.23754e-05	1.36722e-11	-5.04472e-05	-1.69673e-11	-2.8727e-07	1.70882e-11	-2.68929e-07	-2.05316e-12	9.15856e-12
map-data-2021.01.25-17.48.04.912_0293.jpk-force	293	4.29686e-07	-2.14844e-06	-7.17739e-09	9.99422e-06	9.93445e-11	-3.14803e-05	-1.75394e-11	1.07087e-06	1.09449e-11	1.07587e-06	-3.40115e-12	6.1106e-12
map-data-2021.01.25-17.48.04.912_0294.jpk-force	294	5.07812e-07	-2.14844e-06	-7.15719e-09	1.15438e-05	1.88198e-11	-4.63772e-05	-4.76887e-11	-1.94401e-06	1.84491e-11	-1.8726e-06	-9.86922e-12	1.41346e-11
map-data-2021.01.25-17.48.04.912_0295.jpk-force	295	5.85936e-07	-2.14844e-06	-7.13885e-09	1.12439e-05	3.90261e-12	-6.36356e-05	-1.69665e-11	-1.51031e-06	1.09531e-11	-1.50597e-06	-4.20995e-12	6.69072e-12
map-data-2021.01.25-17.48.04.912_0296.jpk-force	296	6.64062e-07	-2.14844e-06	-7.14346e-09	1.10282e-05	2.79679e-12	-5.52073e-05	-1.25856e-11	-1.50128e-06	3.56021e-12	-1.50528e-06	-3.55356e-12	4.61529e-12
map-data-2021.01.25-17.48.04.912_0297.jpk-force	297	7.42187e-07	-2.14844e-06	-7.14303e-09	1.09917e-05	1.71411e-11	-5.42604e-05	-4.11581e-11	-2.00438e-06	2.20243e-11	-1.97135e-06	-6.34482e-12	1.1554e-11
map-data-2021.01.25-17.48.04.912_0298.jpk-force	298	8.20312e-07	-2.14844e-06	-7.11716e-09	1.07035e-05	1.62832e-11	-4.68893e-05	-1.86331e-11	-1.07067e-06	2.37028e-12	-1.07334e-06	-7.08517e-12	6.65848e-12
map-data-2021.01.25-17.48.04.912_0299.jpk-force	299	8.98437e-07	-2.14844e-06	-7.11957e-09	1.02236e-05	-1.46297e-11	-7.92561e-05	-6.2424e-11	-1.821e-06	2.14533e-11	-1.73892e-06	-1.58808e-11	2.02652e-11
map-data-2021.01.25-17.48.04.912_0300.jpk-force	300	9.76562e-07	-2.14844e-06	-7.11083e-09	1.07402e-05	2.88928e-11	-4.03591e-05	-5.00312e-11	-9.34379e-07	1.31193e-11	-8.7402e-07	-2.2611e-11	1.3939e-11
map-data-2021.01.25-17.48.04.912_0301.jpk-force	301	1.05469e-06	-2.14844e-06	-7.09521e-09	9.66348e-06	2.36188e-11	-5.22175e-05	-1.49024e-11	-2.29977e-08	1.09104e-11	-3.33355e-08	-2.92556e-12	6.1944e-12
map-data-2021.01.25-17.48.04.912_0302.jpk-force	302	1.13281e-06	-2.14844e-06	-7.10227e-09	1.0313e-05	1.80936e-11	-4.92677e-05	-1.90499e-11	-8.19935e-07	1.76699e-11	-8.14599e-07	1.52259e-12	8.24143e-12
map-data-2021.01.25-17.48.04.912_0303.jpk-force	303	1.21094e-06	-2.14844e-06	-7.11318e-09	1.03662e-05	2.06939e-11	-4.31105e-05	-4.2995e-11	-1.3676e-06	1.61115e-11	-1.49968e-06	-1.08433e-11	9.37382e-12
map-data-2021.01.25-17.48.04.912_0304.jpk-force	304	1.28906e-06	-2.14844e-06	-7.1084e-09	1.02625e-05	1.84373e-11	-4.6095e-05	-1.91179e-11	-1.38029e-06	2.39508e-11	-1.50072e-06	2.87021e-12	8.3155e-12
map-data-2021.01.25-17.48.04.912_0305.jpk-force	305	1.36719e-06	-2.14844e-06	-7.10562e-09	1.0576e-05	1.69558e-11	-5.38136e-05	-9.13705e-12	-6.80918e-07	1.82505e-11	-6.85253e-07	3.24566e-13	7.38748e-12
map-data-2021.01.25-17.48.04.912_0306.jpk-force	306	1.44531e-06	-2.14844e-06	-7.10201e-09	1.02941e-05	1.71406e-11	-5.83758e-05	-5.48366e-12	-6.8861e-07	1.16022e-11	-6.86276e-07	1.92038e-12	4.86892e-12
map-data-2021.01.25-17.48.04.912_0307.jpk-force	307	1.52344e-06	-2.14844e-06	-7.11514e-09	1.01408e-05	1.76912e-11	-4.13191e-05	-1.54339e-11	-6.92418e-07	6.59822e-12	-6.73744e-07	-4.33819e-12	4.92499e-12
map-data-2021.01.25-17.48.04.912_0308.jpk-force	308	1.60156e-06	-2.14844e-06	-7.05263e-09	8.52809e-06	5.37633e-11	-2.77194e-05	-5.72228e-11	4.23881e-10	3.05945e-11	1.50835e-07	-1.81232e-11	1.92502e-11
map-data-2021.01.25-17.48.04.912_0309.jpk-force	309	1.67969e-06	-2.14844e-06	-7.08888e-09	1.01115e-05	1.58484e-11	-4.76212e-05	-1.62829e-11	-1.14338e-06	1.17169e-11	-1.16438e-06	1.47042e-12	6.22747e-12
map-data-2021.01.25-17.48.04.912_0310.jpk-force	310	1.75781e-06	-2.14844e-06	-7.10224e-09	1.07464e-05	1.76588e-11	-4.95918e-05	-1.13823e-11	-1.16576e-06	1.9771e-11	-1.16176e-06	1.37949e-12	7.80464e-12
map-data-2021.01.25-17.48.04.912_0311.jpk-force	311	1.83594e-06	-2.14844e-06	-7.12384e-09	1.05815e-05	1.80924e-11	-4.35119e-05	-1.21148e-11	-1.1457e-06	1.35884e-11	-1.16438e-06	1.00938e-12	6.50569e-12
map-data-2021.01.25-17.48.04.912_0312.jpk-force	312	1.91406e-06	-2.14844e-06	-7.11481e-09	1.04086e-05	2.27832e-11	-4.59055e-05	-1.34382e-11	-1.16e-06	1.33447e-11	-1.16733e-06	-1.12357e-12	6.71521e-12
map-data-2021.01.25-17.48.04.912_0313.jpk-force	313	1.99219e-06	-2.14844e-06	-7.12449e-09	1.07154e-05	1.63422e-11	-5.30652e-05	-5.05288e-11	-1.97426e-06	2.45275e-11	-1.93088e-06	-2.24708e-11	1.3831e-11
map-data-2021.01.25-17.48.04.912_0314.jpk-force	314	2.07031e-06	-2.14844e-06	-7.09643e-09	1.06121e-05	1.73384e-11	-3.65139e-05	-1.32154e-11	-2.10892e-06	4.44826e-11	-1.93138e-06	1.35258e-11	1.19104e-11
map-data-2021.01.25-17.48.04.912_0315.jpk-force	315	2.14844e-06	-2.14844e-06	-7.10009e-09	1.06489e-05	2.11585e-11	-4.76161e-05	-9.54396e-12	-2.00549e-06	2.72701e-11	-2.13765e-06	9.33828e-12	8.33744e-12
map-data-2021.01.25-17.48.04.912_0316.jpk-force	316	2.22656e-06	-2.14844e-06	-7.12558e-09	1.08669e-05	1.53629e-11	-4.38298e-05	-1.88429e-12	-1.93858e-06	4.19383e-11	-2.02433e-06	1.76827e-11	8.23334e-12
map-data-2021.01.25-17.48.04.912_0317.jpk-force	317	2.30469e-06	-2.14844e-06	-7.16604e-09	1.06904e-05	2.08784e-11	-4.40264e-05	-1.64544e-11	-1.92678e-06	4.71302e-11	-2.15105e-06	1.51866e-11	1.19898e-11
map-data-2021.01.25-17.48.04.912_0318.jpk-force	318	2.38281e-06	-2.14844e-06	-7.12192e-09	1.16149e-05	1.31755e-11	-5.3093e-05	-1.97525e-11	-1.26158e-06	7.51913e-12	-1.25725e-06	-6.06251e-12	7.41669e-12
map-data-2021.01.25-17.48.04.912_0319.jpk-force	319	2.46094e-06	-2.14844e-06	-7.14365e-09	1.0555e-05	2.43244e-11	-4.74399e-05	-1.76239e-11	-1.18399e-06	8.48716e-12	-1.14964e-06	-2.83326e-12	6.43211e-12
map-data-2021.01.25-17.48.04.912_0320.jpk-force	320	2.46094e-06	-2.07031e-06	-7.17997e-09	1.07133e-05	3.77468e-14	-5.36058e-05	-1.45447e-11	-1.76824e-06	2.00884e-11	-1.78692e-06	1.4374e-12	7.18882e-12
map-data-2021.01.25-17.48.04.912_0321.jpk-force	321	2.38281e-06	-2.07031e-06	-7.17779e-09	1.09144e-05	4.93604e-12	-5.55592e-05	-1.62336e-11	-1.79945e-06	2.24445e-11	-1.80379e-06	-3.39191e-12	6.89984e-12
map-data-2021.01.25-17.48.04.912_0322.jpk-force	322	2.30469e-06	-2.07031e-06	-7.13303e-09	1.12193e-05	1.90611e-12	-5.66731e-05	-1.42013e-11	-1.7396e-06	1.53119e-11	-1.73493e-06	-1.31869e-12	8.34467e-12
map-data-2021.01.25-17.48.04.912_0323.jpk-force	323	2.22656e-06	-2.07031e-06	-7.12641e-09	1.087e-05	-7.5757e-12	-6.1382e-05	-1.07763e-11	-1.74453e-06	1.09584e-11	-1.73552e-06	-2.01631e-12	6.76363e-12
map-data-2021.01.25-17.48.04.912_0324.jpk-force	324	2.14844e-06	-2.07031e-06	-7.14465e-09	1.11659e-05	-6.3419e-12	-6.23541e-05	-1.56421e-11	-1.74552e-06	1.68207e-11	-1.73584e-06	-2.15287e-13	8.34458e-12
map-data-2021.01.25-17.48.04.912_0325.jpk-force	325	2.07031e-06	-2.07031e-06	-7.18834e-09	1.12153e-05	-1.38955e-11	-7.80165e-05	-1.09106e-11	-1.74055e-06	1.59046e-11	-1.74822e-06	-1.41678e-12	6.04135e-12
map-data-2021.01.25-17.48.04.912_0326.jpk-force	326	1.99219e-06	-2.07031e-06	-7.16204e-09	1.1163e-05	-3.14517e-12	-5.74346e-05	-1.48082e-11	-1.74525e-06	7.43332e-12	-1.74125e-06	-3.3641e-12	6.04101e-12
map-data-2021.01.25-17.48.04.912_0327.jpk-force	327	1.91406e-06	-2.07031e-06	-7.15923e-09	1.11581e-05	-1.72454e-11	-6.48741e-05	-1.02034e-11	-1.74581e-06	8.22858e-12	-1.74848e-06	-6.9278e-13	5.67923e-12
map-data-2021.01.25-17.48.04.912_0328.jpk-force	328	1.83594e-06	-2.07031e-06	-7.14673e-09	1.07671e-05	1.54157e-11	-4.74205e-05	-3.98433e-11	-1.58042e-06	2.06441e-11	-1.52938e-06	-1.40444e-11	1.29712e-11
map-data-2021.01.25-17.48.04.912_0329.jpk-force	329	1.75781e-06	-2.07031e-06	-7.15148e-09	1.09104e-05	1.47678e-11	-5.58571e-05	-1.58939e-11	-1.49531e-06	2.43282e-11	-1.49097e-06	1.36349e-12	1.021e-11
map-data-2021.01.25-17.48.04.912_0330.jpk-force	330	1.67969e-06	-2.07031e-06	-7.14007e-09	1.1099e-05	1.76812e-13	-5.41171e-05	-9.64588e-12	-1.50322e-06	1.35978e-11	-1.49154e-06	1.11459e-12	6.01011e-12
map-data-2021.01.25-17.48.04.912_0331.jpk-force	331	1.60156e-06	-2.07031e-06	-7.15396e-09	1.09083e-05	1.29063e-11	-5.23145e-05	-6.88199e-12	-1.49504e-06	1.81199e-11	-1.50238e-06	5.06701e-12	6.68865e-12
map-data-2021.01.25-17.48.04.912_0332.jpk-force	332	1.52344e-06	-2.07031e-06	-7.15442e-09	1.0874e-05	-1.65022e-11	-6.92504e-05	-4.17736e-11	-2.52835e-06	2.31552e-11	-2.45592e-06	-1.20422e-11	1.46443e-11
map-data-2021.01.25-17.48.04.912_0333.jpk-force	333	1.44531e-06	-2.07031e-06	-7.1786e-09	1.02273e-05	1.18596e-11	-6.93588e-05	-9.0426e-12	-2.73044e-07	1.75574e-11	-2.76045e-07	2.9927e-12	7.46106e-12
map-data-2021.01.25-17.48.04.912_0334.jpk-force	334	1.36719e-06	-2.07031e-06	-7.1662e-09	1.10514e-05	2.48463e-11	-5.87991e-05	-4.66973e-11	-1.70803e-06	3.64283e-12	-1.58192e-06	-2.17887e-11	1.0872e-11
map-data-2021.01.25-17.48.04.912_0335.jpk-force	335	1.28906e-06	-2.07031e-06	-7.22227e-09	1.20628e-05	3.15417e-11	-5.85669e-05	-1.37187e-11	-1.51933e-06	1.72908e-11	-1.50165e-06	1.4775e-12	6.98882e-12
map-data-2021.01.25-17.48.04.912_0336.jpk-force	336	1.21094e-06	-2.07031e-06	-7.19384e-09	1.18141e-05	2.23772e-11	-5.05481e-05	-1.87122e-11	-1.97196e-06	2.43588e-11	-2.01233e-06	8.21927e-13	8.07109e-12
map-data-2021.01.25-17.48.04.912_0337.jpk-force	337	1.13281e-06	-2.07031e-06	-7.21815e-09	1.19667e-05	2.20783e-11	-5.65307e-05	-1.95013e-11	-1.99076e-06	2.14545e-11	-1.94372e-06	2.18303e-12	7.89176e-12
map-data-2021.01.25-17.48.04.912_0338.jpk-force	338	1.05469e-06	-2.07031e-06	-7.15785e-09	1.09785e-05	3.80513e-12	-7.15702e-05	-2.00164e-11	-1.44082e-06	1.67423e-11	-1.47518e-06	-1.37485e-13	8.25051e-12
map-data-2021.01.25-17.48.04.912_0339.jpk-force	339	9.76563e-07	-2.07031e-06	-7.14198e-09	1.08452e-05	1.69734e-11	-5.17962e-05	-1.77954e-11	-1.45798e-06	2.30481e-11	-1.48934e-06	1.68112e-13	9.44278e-12
map-data-2021.01.25-17.48.04.912_0340.jpk-force	340	8.98437e-07	-2.07031e-06	-7.14104e-09	1.12173e-05	1.56881e-11	-5.40692e-05	-2.14276e-11	-1.45724e-06	1.22157e-11	-1.46024e-06	-3.56042e-12	6.64624e-12
map-data-2021.01.25-17.48.04.912_0341.jpk-force	341	8.20312e-07	-2.07031e-06	-7.12382e-09	1.08524e-05	1.08765e-11	-5.41436e-05	-1.65659e-11	-1.44416e-06	1.15751e-11	-1.48352e-06	-1.35761e-12	6.75782e-12
map-data-2021.01.25-17.48.04.912_0342.jpk-force	342	7.42187e-07	-2.07031e-06	-7.16339e-09	1.11759e-05	6.31285e-12	-5.74042e-05	-1.13559e-11	-1.277e-06	1.37399e-11	-1.28133e-06	4.55873e-13	6.87035e-12
map-data-2021.01.25-17.48.04.912_0343.jpk-force	343	6.64062e-07	-2.07031e-06	-7.16957e-09	1.07032e-05	4.06121e-11	-5.42466e-05	-4.54597e-11	1.49698e-09	2.57442e-11	7.21965e-08	-1.08761e-11	1.39637e-11
map-data-2021.01.25-17.48.04.912_0344.jpk-force	344	5.85938e-07	-2.07031e-06	-7.1742e-09	1.12606e-05	1.53581e-11	-5.01341e-05	-2.27234e-11	-4.17806e-07	1.61294e-11	-3.68783e-07	-1.89766e-12	7.801e-12
map-data-2021.01.25-17.48.04.912_0345.jpk-force	345	5.07813e-07	-2.07031e-06	-7.14852e-09	1.05221e-05	-5.7145e-14	-6.82915e-05	-6.21993e-11	-2.06317e-06	1.01416e-11	-2.02212e-06	-2.69366e-11	1.65332e-11
map-data-2021.01.25-17.48.04.912_0346.jpk-force	346	4.29687e-07	-2.07031e-06	-7.1727e-09	1.08828e-05	7.07948e-11	-2.65131e-05	-1.1582e-11	-1.56174e-06	3.323e-11	-1.56708e-06	4.29841e-12	1.1248e-11
map-data-2021.01.25-17.48.04.912_0347.jpk-force	347	3.51563e-07	-2.07031e-06	-7.18785e-09	1.13072e-05	1.17871e-11	-5.31364e-05	-1.87722e-11	-1.37756e-06	2.01303e-11	-1.36955e-06	-2.21027e-12	1.03898e-11
map-data-2021.01.25-17.48.04.912_0348.jpk-force	348	2.73438e-07	-2.07031e-06	-7.20664e-09	1.09522e-05	3.37612e-12	-6.13018e-05	-1.76015e-11	-1.37526e-06	1.05128e-11	-1.36225e-06	5.97574e-13	7.25668e-12
map-data-2021.01.25-17.48.04.912_0349.jpk-force	349	1.95312e-07	-2.07031e-06	-7.14688e-09	1.01853e-05	1.76253e-11	-6.82536e-05	-1.50487e-11	-1.38019e-06	1.25948e-11	-1.3832e-06	-2.58353e-12	5.69483e-12
map-data-2021.01.25-17.48.04.912_0350.jpk-force	350	1.17187e-07	-2.07031e-06	-7.17908e-09	1.0846e-05	2.38247e-11	-5.16507e-05	-1.95194e-11	-1.38207e-06	1.0687e-11	-1.37073e-06	-3.93396e-12	9.05259e-12
map-data-2021.01.25-17.48.04.912_0351.jpk-force	351	3.90618e-08	-2.07031e-06	-7.21324e-09	1.08675e-05	-2.18295e-11	-8.32442e-05	-1.6657e-11	-1.80813e-06	1.36722e-11	-1.74941e-06	4.21502e-15	7.72061e-12
map-data-2021.01.25-17.48.04.912_0352.jpk-force	352	-3.90623e-08	-2.07031e-06	-7.19076e-09	1.07949e-05	2.08287e-11	-5.86314e-05	-2.24383e-11	-1.61783e-06	1.42491e-11	-1.62183e-06	-1.67602e-12	8.1513e-12
map-data-2021.01.25-17.48.04.912_0353.jpk-force	353	-1.17187e-07	-2.07031e-06	-7.25391e-09	1.23137e-05	1.10036e-11	-6.03596e-05	-1.92771e-11	-1.23988e-06	1.12996e-11	-1.20486e-06	-3.79035e-12	6.92742e-12
map-data-2021.01.25-17.48.04.912_0354.jpk-force	354	-1.95313e-07	-2.07031e-06	-7.24206e-09	1.21227e-05	1.48345e-11	-5.59624e-05	-8.33151e-12	-1.23781e-06	2.47609e-11	-1.24282e-06	6.57926e-12	9.30253e-12
map-data-2021.01.25-17.48.04.912_0355.jpk-force	355	-2.73438e-07	-2.07031e-06	-7.27999e-09	1.24676e-05	6.63712e-11	-3.30925e-05	-9.53645e-12	-1.20915e-06	2.56246e-11	-1.23983e-06	5.26497e-12	8.95468e-12
map-data-2021.01.25-17.48.04.912_0356.jpk-force	356	-3.51563e-07	-2.07031e-06	-7.23805e-09	1.19894e-05	1.2919e-11	-5.17019e-05	-1.40726e-11	-1.2221e-06	1.74098e-11	-1.24178e-06	2.96649e-12	7.89128e-12
map-data-2021.01.25-17.48.04.912_0357.jpk-force	357	-4.29688e-07	-2.07031e-06	-7.23333e-09	1.20466e-05	4.06845e-12	-5.9759e-05	-1.6609e-11	-9.41252e-07	8.18174e-12	-9.70931e-07	-3.62471e-12	6.9401e-12
map-data-2021.01.25-17.48.04.912_0358.jpk-force	358	-5.07813e-07	-2.07031e-06	-7.20901e-09	1.15143e-05	8.20856e-12	-5.8479e-05	-1.2943e-11	-9.36926e-07	1.48024e-11	-9.51933e-07	1.0966e-12	7.42112e-12
map-data-2021.01.25-17.48.04.912_0359.jpk-force	359	-5.85938e-07	-2.07031e-06	-7.23723e-09	1.20359e-05	1.60997e-11	-5.41095e-05	-1.30141e-11	-9.47289e-07	1.99111e-11	-9.42287e-07	4.75443e-12	7.82768e-12
map-data-2021.01.25-17.48.04.912_0360.jpk-force	360	-6.64063e-07	-2.07031e-06	-7.22925e-09	1.20369e-05	1.29469e-11	-5.28995e-05	-1.45025e-11	-9.50044e-07	1.56536e-11	-9.44375e-07	8.74462e-13	7.03537e-12
map-data-2021.01.25-17.48.04.912_0361.jpk-force	361	-7.42187e-07	-2.07031e-06	-7.21063e-09	1.16213e-05	4.92989e-12	-5.35071e-05	-5.59252e-12	-9.64034e-07	2.09595e-11	-9.42025e-07	5.41473e-12	6.38949e-12
map-data-2021.01.25-17.48.04.912_0362.jpk-force	362	-8.20313e-07	-2.07031e-06	-7.21196e-09	1.1433e-05	1.42226e-11	-5.23965e-05	-9.93554e-12	-9.70767e-07	1.16147e-11	-9.45089e-07	-1.08957e-12	5.21608e-12
map-data-2021.01.25-17.48.04.912_0363.jpk-force	363	-8.98437e-07	-2.07031e-06	-7.2224e-09	1.16337e-05	1.11657e-11	-4.98833e-05	-1.58102e-11	-9.69283e-07	1.32306e-11	-9.43605e-07	-3.55823e-13	6.55158e-12
map-data-2021.01.25-17.48.04.912_0364.jpk-force	364	-9.76563e-07	-2.07031e-06	-7.30947e-09	1.12416e-05	6.37046e-12	-7.35605e-05	-6.78084e-12	-9.6399e-07	1.7347e-11	-9.42314e-07	4.52501e-12	4.86556e-12
map-data-2021.01.25-17.48.04.912_0365.jpk-force	365	-1.05469e-06	-2.07031e-06	-7.26084e-09	1.061e-05	1.14879e-11	-6.09359e-05	-1.78832e-11	-9.47855e-07	1.81785e-11	-9.4185e-07	-3.09698e-12	8.01922e-12
map-data-2021.01.25-17.48.04.912_0366.jpk-force	366	-1.13281e-06	-2.07031e-06	-7.23983e-09	1.14079e-05	1.71231e-11	-4.26545e-05	-1.09727e-11	-9.48748e-07	1.54585e-11	-9.44413e-07	6.53999e-13	5.88409e-12
map-data-2021.01.25-17.48.04.912_0367.jpk-force	367	-1.21094e-06	-2.07031e-06	-7.29218e-09	1.16224e-05	9.68481e-13	-6.10591e-05	-1.36731e-11	-9.47357e-07	2.04656e-11	-9.66031e-07	2.22234e-12	7.1619e-12
map-data-2021.01.25-17.48.04.912_0368.jpk-force	368	-1.28906e-06	-2.07031e-06	-7.26449e-09	1.21509e-05	7.94176e-12	-5.27718e-05	-1.3226e-11	-9.47155e-07	1.98656e-11	-9.58493e-07	6.7186e-13	7.96711e-12
map-data-2021.01.25-17.48.04.912_0369.jpk-force	369	-1.36719e-06	-2.07031e-06	-7.28485e-09	1.18428e-05	1.26501e-10	-2.38273e-05	-4.49013e-11	-2.48384e-06	2.23494e-11	-2.42577e-06	-8.30617e-12	1.44802e-11
map-data-2021.01.25-17.48.04.912_0370.jpk-force	370	-1.44531e-06	-2.07031e-06	-7.26982e-09	1.23678e-05	1.95076e-12	-5.68442e-05	-8.36443e-12	-1.2073e-06	1.30192e-11	-1.20163e-06	1.80838e-12	5.97982e-12
map-data-2021.01.25-17.48.04.912_0371.jpk-force	371	-1.52344e-06	-2.07031e-06	-7.24719e-09	1.19337e-05	7.65282e-12	-5.34351e-05	-4.95706e-11	-2.06867e-06	5.96084e-12	-2.06333e-06	-3.17925e-11	8.85064e-12
map-data-2021.01.25-17.48.04.912_0372.jpk-force	372	-1.60156e-06	-2.07031e-06	-7.24312e-09	1.17861e-05	-2.56761e-11	-6.64983e-05	-5.54275e-11	-2.55092e-06	1.44288e-11	-2.47883e-06	-1.94644e-11	1.44159e-11
map-data-2021.01.25-17.48.04.912_0373.jpk-force	373	-1.67969e-06	-2.07031e-06	-7.23805e-09	1.18552e-05	-2.00106e-11	-6.56468e-05	-1.94564e-11	-2.46999e-06	2.97561e-11	-2.47867e-06	8.21776e-13	9.30916e-12
map-data-2021.01.25-17.48.04.912_0374.jpk-force	374	-1.75781e-06	-2.07031e-06	-7.24339e-09	1.17053e-05	-3.86867e-11	-8.10222e-05	-5.84623e-11	-2.42176e-06	2.24438e-11	-2.38872e-06	-8.40693e-12	1.74443e-11
map-data-2021.01.25-17.48.04.912_0375.jpk-force	375	-1.83594e-06	-2.07031e-06	-7.24996e-09	1.16253e-05	4.40822e-11	-3.20943e-05	-5.29527e-11	-2.43703e-06	1.58876e-11	-2.36494e-06	-2.13375e-11	1.74175e-11
map-data-2021.01.25-17.48.04.912_0376.jpk-force	376	-1.91406e-06	-2.07031e-06	-7.30039e-09	1.17718e-05	4.98002e-12	-7.68187e-05	-4.62023e-11	-1.70638e-06	2.02081e-11	-1.67035e-06	-9.1412e-12	1.1571e-11
map-data-2021.01.25-17.48.04.912_0377.jpk-force	377	-1.99219e-06	-2.07031e-06	-7.29872e-09	1.23289e-05	2.57758e-11	-5.46131e-05	-1.11356e-11	-6.6124e-07	9.00948e-12	-6.6891e-07	-3.75899e-15	5.73355e-12
map-data-2021.01.25-17.48.04.912_0378.jpk-force	378	-2.07031e-06	-2.07031e-06	-7.25536e-09	1.09582e-05	3.72528e-11	-5.98708e-05	-7.54486e-12	-6.61951e-07	4.92704e-12	-6.66953e-07	-1.07408e-12	3.62142e-12
map-data-2021.01.25-17.48.04.912_0379.jpk-force	379	-2.14844e-06	-2.07031e-06	-7.24087e-09	1.12749e-05	-1.22807e-10	-0.000119325	-5.89274e-11	-2.52949e-06	2.05039e-11	-2.47042e-06	-1.98025e-11	1.76866e-11
map-data-2021.01.25-17.48.04.912_0380.jpk-force	380	-2.22656e-06	-2.07031e-06	-7.26289e-09	1.15133e-05	-4.26427e-11	-9.09952e-05	-1.26061e-11	-1.82596e-06	1.61529e-11	-1.85633e-06	1.94038e-12	8.0263e-12
map-data-2021.01.25-17.48.04.912_0381.jpk-force	381	-2.30469e-06	-2.07031e-06	-7.23006e-09	1.152e-05	-3.17885e-12	-5.26154e-05	-6.10936e-11	-2.70178e-06	2.57483e-11	-2.67374e-06	-1.79951e-11	1.84545e-11
map-data-2021.01.25-17.48.04.912_0382.jpk-force	382	-2.38281e-06	-2.07031e-06	-7.19464e-09	1.14422e-05	7.05646e-12	-4.96634e-05	-1.04124e-11	-2.74787e-06	3.5744e-11	-2.78124e-06	9.40145e-12	8.25195e-12
map-data-2021.01.25-17.48.04.912_0383.jpk-force	383	-2.46094e-06	-2.07031e-06	-7.22034e-09	1.13629e-05	-1.6433e-12	-6.18656e-05	-2.05394e-11	-2.75655e-06	3.79624e-11	-2.56864e-06	6.7177e-12	1.00001e-11
map-data-2021.01.25-17.48.04.912_0384.jpk-force	384	-2.46094e-06	-1.99219e-06	-7.20798e-09	1.11541e-05	-9.25933e-12	-6.02131e-05	-1.13235e-11	-2.54969e-06	3.46361e-11	-2.71322e-06	1.22905e-11	9.45134e-12
map-data-2021.01.25-17.48.04.912_0385.jpk-force	385	-2.38281e-06	-1.99219e-06	-7.19049e-09	1.11183e-05	1.33364e-11	-4.52149e-05	-1.46138e-11	-4.5438e-07	2.25744e-11	-4.37372e-07	-1.63765e-12	6.6829e-12
map-data-2021.01.25-17.48.04.912_0386.jpk-force	386	-2.30469e-06	-1.99219e-06	-7.22325e-09	1.10875e-05	1.36104e-11	-5.22276e-05	-3.77298e-11	-1.51064e-06	2.31966e-11	-1.46227e-06	-9.65928e-12	1.18437e-11
map-data-2021.01.25-17.48.04.912_0387.jpk-force	387	-2.22656e-06	-1.99219e-06	-7.21263e-09	1.06501e-05	3.33169e-11	-2.16818e-05	-1.5833e-11	-1.48109e-06	5.15162e-11	-1.67163e-06	1.9635e-11	1.3452e-11
map-data-2021.01.25-17.48.04.912_0388.jpk-force	388	-2.14844e-06	-1.99219e-06	-7.22101e-09	1.09221e-05	9.46441e-12	-4.78995e-05	-2.15317e-11	-1.49561e-06	2.41946e-11	-1.64372e-06	4.00433e-13	7.90551e-12
map-data-2021.01.25-17.48.04.912_0389.jpk-force	389	-2.07031e-06	-1.99219e-06	-7.19614e-09	1.10319e-05	-8.90902e-11	-9.52216e-05	-5.14991e-11	-2.62958e-06	2.11451e-11	-2.58285e-06	-1.1192e-11	1.53183e-11
map-data-2021.01.25-17.48.04.912_0390.jpk-force	390	-1.99219e-06	-1.99219e-06	-7.22959e-09	1.10921e-05	-1.9025e-10	-0.00015787	-6.84272e-11	-2.67952e-06	1.16712e-11	-2.57039e-06	-2.53791e-11	2.35967e-11
map-data-2021.01.25-17.48.04.912_0391.jpk-force	391	-1.91406e-06	-1.99219e-06	-7.22336e-09	1.08877e-05	-2.82783e-11	-8.56008e-05	-2.98954e-11	-2.65451e-06	2.3955e-11	-2.58176e-06	-4.62178e-12	1.09032e-11
map-data-2021.01.25-17.48.04.912_0392.jpk-force	392	-1.83594e-06	-1.99219e-06	-7.24736e-09	1.1033e-05	1.38132e-11	-0.000114349	-1.08971e-11	-6.37509e-07	2.98744e-11	-6.46513e-07	3.77084e-12	1.0893e-11
map-data-2021.01.25-17.48.04.912_0393.jpk-force	393	-1.75781e-06	-1.99219e-06	-7.19574e-09	1.15077e-05	1.83283e-11	-4.48587e-05	-8.60433e-12	-6.33826e-07	2.05114e-11	-6.30158e-07	5.2626e-12	7.80732e-12
map-data-2021.01.25-17.48.04.912_0394.jpk-force	394	-1.67969e-06	-1.99219e-06	-7.21651e-09	1.06994e-05	-1.31332e-10	-0.000139812	-3.77192e-11	-2.3649e-06	2.72587e-11	-2.2828e-06	-6.92312e-12	1.7365e-11
map-data-2021.01.25-17.48.04.912_0395.jpk-force	395	-1.60156e-06	-1.99219e-06	-7.17853e-09	1.07594e-05	-1.17116e-10	-0.000114064	-1.79828e-11	-2.29157e-06	2.34791e-11	-2.38702e-06	1.14385e-12	8.05716e-12
map-data-2021.01.25-17.48.04.912_0396.jpk-force	396	-1.52344e-06	-1.99219e-06	-7.2505e-09	1.03407e-05	3.79952e-11	-4.06574e-05	-1.80868e-11	9.09563e-07	1.97102e-11	9.45568e-07	-6.78547e-13	7.86793e-12
map-data-2021.01.25-17.48.04.912_0397.jpk-force	397	-1.44531e-06	-1.99219e-06	-7.22619e-09	1.1424e-05	-1.32158e-11	-7.47275e-05	-5.06848e-11	-1.36464e-06	9.36846e-12	-1.30761e-06	-2.41981e-11	1.15566e-11
map-data-2021.01.25-17.48.04.912_0398.jpk-force	398	-1.36719e-06	-1.99219e-06	-7.26836e-09	1.12817e-05	-2.45937e-11	-0.000106642	-3.68737e-11	-1.45577e-06	2.11841e-11	-1.43642e-06	-8.53522e-12	1.15315e-11
map-data-2021.01.25-17.48.04.912_0399.jpk-force	399	-1.28906e-06	-1.99219e-06	-7.20163e-09	1.13262e-05	-2.35253e-12	-5.532e-05	-3.83599e-11	-2.71918e-06	4.36569e-11	-2.69915e-06	1.32357e-12	1.56975e-11
map-data-2021.01.25-17.48.04.912_0400.jpk-force	400	-1.21094e-06	-1.99219e-06	-7.19452e-09	1.08848e-05	2.06907e-11	-5.79177e-05	-1.34585e-11	-2.58472e-07	2.19027e-11	-2.91488e-07	1.87351e-12	8.06643e-12
map-data-2021.01.25-17.48.04.912_0401.jpk-force	401	-1.13281e-06	-1.99219e-06	-7.26575e-09	1.06339e-05	1.56906e-11	-3.42015e-05	-8.0943e-12	-2.71456e-07	2.51759e-11	-2.66788e-07	7.62635e-12	6.96361e-12
map-data-2021.01.25-17.48.04.912_0402.jpk-force	402	-1.05469e-06	-1.99219e-06	-7.23576e-09	1.05121e-05	2.10158e-11	-3.72613e-05	-1.38915e-11	-2.71791e-07	1.9321e-11	-2.80795e-07	1.56004e-12	7.7984e-12
map-data-2021.01.25-17.48.04.912_0403.jpk-force	403	-9.76563e-07	-1.99219e-06	-7.23493e-09	1.11188e-05	2.58312e-11	-4.46478e-05	-1.66686e-11	-2.97789e-07	2.77573e-11	-2.92786e-07	9.26682e-13	9.27801e-12
map-data-2021.01.25-17.48.04.912_0404.jpk-force	404	-8.98437e-07	-1.99219e-06	-7.18042e-09	1.09723e-05	2.12211e-11	-4.75019e-05	-1.72583e-11	-2.72966e-07	1.953e-11	-3.05981e-07	-1.55395e-12	7.76174e-12
map-data-2021.01.25-17.48.04.912_0405.jpk-force	405	-8.20313e-07	-1.99219e-06	-7.1599e-09	1.12111e-05	1.50691e-11	-4.45028e-05	-1.27223e-11	-3.11558e-07	2.42506e-11	-3.06889e-07	9.21377e-13	6.57467e-12
map-data-2021.01.25-17.48.04.912_0406.jpk-force	406	-7.42187e-07	-1.99219e-06	-7.20836e-09	1.05583e-05	1.83583e-11	-1.91747e-05	-1.5455e-11	-2.5914e-07	2.65164e-11	-2.54471e-07	3.81598e-12	8.68366e-12
map-data-2021.01.25-17.48.04.912_0407.jpk-force	407	-6.64063e-07	-1.99219e-06	-7.23015e-09	1.04555e-05	2.25301e-11	-2.51412e-05	-1.58705e-11	-2.86306e-07	2.1312e-11	-2.90641e-07	3.35342e-12	6.66834e-12
map-data-2021.01.25-17.48.04.912_0408.jpk-force	408	-5.85938e-07	-1.99219e-06	-7.17037e-09	1.05264e-05	2.28034e-11	-3.12396e-05	-1.60519e-11	-2.50946e-07	1.82129e-11	-3.06637e-07	1.58409e-12	7.69355e-12
map-data-2021.01.25-17.48.04.912_0409.jpk-force	409	-5.07813e-07	-1.99219e-06	-7.16819e-09	1.09108e-05	3.16573e-11	-4.45769e-05	-3.98041e-11	-2.17202e-06	1.78907e-11	-2.14366e-06	-7.12304e-12	1.50241e-11
map-data-2021.01.25-17.48.04.912_0410.jpk-force	410	-4.29688e-07	-1.99219e-06	-7.18244e-09	1.08609e-05	1.28444e-11	-5.12099e-05	-1.63881e-11	-1.00097e-06	2.09319e-11	-1.01897e-06	3.54206e-12	9.07359e-12
map-data-2021.01.25-17.48.04.912_0411.jpk-force	411	-3.51563e-07	-1.99219e-06	-7.1783e-09	1.07608e-05	7.81889e-13	-5.9233e-05	-4.43773e-11	-2.08069e-06	1.91773e-11	-2.00895e-06	-9.44007e-12	1.24132e-11
map-data-2021.01.25-17.48.04.912_0412.jpk-force	412	-2.73438e-07	-1.99219e-06	-7.18915e-09	1.07407e-05	1.55627e-11	-5.29963e-05	-4.32674e-11	-2.11825e-06	1.56932e-11	-1.96874e-06	-1.85447e-11	1.45897e-11
map-data-2021.01.25-17.48.04.912_0413.jpk-force	413	-1.95313e-07	-1.99219e-06	-7.16792e-09	1.07885e-05	1.03412e-11	-4.37896e-05	-3.43217e-11	-1.47345e-06	1.75213e-11	-1.46545e-06	-7.14683e-12	9.94395e-12
map-data-2021.01.25-17.48.04.912_0414.jpk-force	414	-1.17188e-07	-1.99219e-06	-7.22052e-09	1.10096e-05	2.22434e-11	-7.38921e-05	-1.83949e-11	-1.45663e-06	1.83991e-11	-1.50032e-06	6.68827e-14	7.13274e-12
map-data-2021.01.25-17.48.04.912_0415.jpk-force	415	-3.90635e-08	-1.99219e-06	-7.2044e-09	1.07819e-05	1.79456e-11	-5.06524e-05	-1.7763e-11	-1.53495e-06	1.87218e-11	-1.43622e-06	5.0905e-13	8.28193e-12
map-data-2021.01.25-17.48.04.912_0416.jpk-force	416	3.90618e-08	-1.99219e-06	-7.22469e-09	1.12889e-05	1.21973e-11	-5.37723e-05	-9.93294e-12	-1.44683e-06	3.82336e-11	-1.54355e-06	1.38e-11	9.01414e-12
map-data-2021.01.25-17.48.04.912_0417.jpk-force	417	1.17188e-07	-1.99219e-06	-7.19966e-09	1.13107e-05	9.10612e-12	-5.16922e-05	-1.56838e-11	-1.52237e-06	1.64808e-11	-1.50536e-06	5.64382e-13	6.88348e-12
map-data-2021.01.25-17.48.04.912_0418.jpk-force	418	1.95312e-07	-1.99219e-06	-7.14719e-09	1.05139e-05	1.20256e-11	-5.69468e-05	-1.68145e-11	-1.43039e-06	2.04072e-11	-1.42505e-06	2.55497e-13	8.1857e-12
map-data-2021.01.25-17.48.04.912_0419.jpk-force	419	2.73438e-07	-1.99219e-06	-7.16741e-09	1.0739e-05	1.46142e-11	-6.32751e-05	-1.42501e-11	-1.56134e-06	2.93792e-11	-1.46595e-06	4.96816e-12	7.2886e-12
map-data-2021.01.25-17.48.04.912_0420.jpk-force	420	3.51562e-07	-1.99219e-06	-7.18883e-09	1.05759e-05	1.51287e-11	-5.25701e-05	-1.86918e-11	-1.5099e-06	2.38747e-11	-1.43752e-06	1.08083e-12	8.65247e-12
map-data-2021.01.25-17.48.04.912_0421.jpk-force	421	4.29686e-07	-1.99219e-06	-7.19355e-09	1.06739e-05	1.72243e-11	-5.31502e-05	-1.49631e-11	-1.43243e-06	2.07023e-11	-1.42142e-06	-2.8948e-12	1.04259e-11
map-data-2021.01.25-17.48.04.912_0422.jpk-force	422	5.07812e-07	-1.99219e-06	-7.21898e-09	1.04395e-05	1.12746e-11	-5.28542e-05	-2.50092e-12	-1.42788e-06	1.46747e-11	-1.42255e-06	4.86205e-12	4.58465e-12
map-data-2021.01.25-17.48.04.912_0423.jpk-force	423	5.85936e-07	-1.99219e-06	-7.23274e-09	1.04736e-05	1.53113e-11	-5.80832e-05	-1.18917e-11	-1.42789e-06	1.93812e-11	-1.42322e-06	9.87828e-13	7.33793e-12
map-data-2021.01.25-17.48.04.912_0424.jpk-force	424	6.64062e-07	-1.99219e-06	-7.19423e-09	1.03941e-05	9.34673e-12	-5.06678e-05	-1.63638e-11	-1.41888e-06	5.00154e-12	-1.42221e-06	-3.58102e-12	5.27528e-12
map-data-2021.01.25-17.48.04.912_0425.jpk-force	425	7.42187e-07	-1.99219e-06	-7.17158e-09	1.03962e-05	1.79975e-11	-5.29216e-05	-9.54345e-12	-1.43199e-06	1.06319e-11	-1.42098e-06	-1.78137e-12	5.17373e-12
map-data-2021.01.25-17.48.04.912_0426.jpk-force	426	8.20312e-07	-1.99219e-06	-7.1344e-09	1.03685e-05	1.45516e-11	-5.1771e-05	-1.99167e-11	-1.4292e-06	3.04243e-12	-1.42587e-06	-7.45076e-12	7.25748e-12
map-data-2021.01.25-17.48.04.912_0427.jpk-force	427	8.98437e-07	-1.99219e-06	-7.11976e-09	1.0392e-05	1.87165e-11	-5.65557e-05	-9.13632e-12	-1.41376e-06	1.35758e-11	-1.42343e-06	3.35922e-13	6.06512e-12
map-data-2021.01.25-17.48.04.912_0428.jpk-force	428	9.76562e-07	-1.99219e-06	-7.15234e-09	1.04472e-05	1.15907e-11	-5.69105e-05	-1.32132e-11	-1.4318e-06	1.32224e-11	-1.42046e-06	2.2273e-12	7.13956e-12
map-data-2021.01.25-17.48.04.912_0429.jpk-force	429	1.05469e-06	-1.99219e-06	-7.16713e-09	1.04487e-05	1.61596e-11	-5.37762e-05	-2.0839e-11	-1.43275e-06	6.12654e-12	-1.41408e-06	-3.52368e-12	6.83053e-12
map-data-2021.01.25-17.48.04.912_0430.jpk-force	430	1.13281e-06	-1.99219e-06	-7.17085e-09	1.02017e-05	1.56395e-11	-4.75746e-05	-1.39288e-11	-1.41663e-06	1.59895e-11	-1.42064e-06	3.88385e-13	7.75521e-12
map-data-2021.01.25-17.48.04.912_0431.jpk-force	431	1.21094e-06	-1.99219e-06	-7.14608e-09	1.02525e-05	1.52519e-11	-4.94727e-05	-8.57107e-12	-1.43177e-06	1.08925e-11	-1.42744e-06	-3.18177e-13	4.61168e-12
map-data-2021.01.25-17.48.04.912_0432.jpk-force	432	1.28906e-06	-1.99219e-06	-7.13769e-09	1.02662e-05	1.83894e-11	-5.04253e-05	-4.17948e-11	-1.82244e-06	2.12769e-11	-1.69667e-06	-1.303e-11	1.32941e-11
map-data-2021.01.25-17.48.04.912_0433.jpk-force	433	1.36719e-06	-1.99219e-06	-7.11928e-09	1.01541e-05	1.31781e-11	-5.38713e-05	-1.06256e-11	-1.7825e-06	1.9101e-11	-1.77816e-06	5.78887e-12	6.79556e-12
map-data-2021.01.25-17.48.04.912_0434.jpk-force	434	1.44531e-06	-1.99219e-06	-7.1051e-09	9.9652e-06	1.64648e-11	-3.67427e-05	-1.54278e-11	-9.03161e-08	1.46023e-11	-1.07324e-07	-9.05459e-13	7.66231e-12
map-data-2021.01.25-17.48.04.912_0435.jpk-force	435	1.52344e-06	-1.99219e-06	-7.14974e-09	1.02599e-05	2.11027e-11	-5.8918e-05	-1.85147e-11	-9.30253e-08	1.05685e-11	-8.7356e-08	-5.97005e-13	6.13682e-12
map-data-2021.01.25-17.48.04.912_0436.jpk-force	436	1.60156e-06	-1.99219e-06	-7.1954e-09	1.04963e-05	1.76141e-11	-4.3262e-05	-1.12559e-11	-1.03317e-07	1.69538e-11	-8.63087e-08	3.77879e-12	8.01238e-12
map-data-2021.01.25-17.48.04.912_0437.jpk-force	437	1.67969e-06	-1.99219e-06	-7.1741e-09	1.04513e-05	2.10636e-11	-5.38567e-05	-5.24654e-11	-1.75483e-06	1.48896e-12	-1.71947e-06	-2.58741e-11	1.24846e-11
map-data-2021.01.25-17.48.04.912_0438.jpk-force	438	1.75781e-06	-1.99219e-06	-7.14646e-09	1.0293e-05	1.52821e-11	-4.18453e-05	-2.09571e-11	-1.76808e-06	1.95563e-11	-1.76408e-06	-2.82954e-13	7.91326e-12
map-data-2021.01.25-17.48.04.912_0439.jpk-force	439	1.83594e-06	-1.99219e-06	-7.14664e-09	1.05633e-05	2.22802e-11	-4.95189e-05	-1.86142e-11	-1.2757e-06	7.60202e-12	-1.2817e-06	-3.56936e-12	6.2879e-12
map-data-2021.01.25-17.48.04.912_0440.jpk-force	440	1.91406e-06	-1.99219e-06	-7.14319e-09	1.06064e-05	3.72371e-11	-4.10295e-05	-1.06577e-11	-1.27365e-06	1.68546e-11	-1.25331e-06	4.29289e-12	6.22486e-12
map-data-2021.01.25-17.48.04.912_0441.jpk-force	441	1.99219e-06	-1.99219e-06	-7.14982e-09	1.07153e-05	1.51712e-11	-4.10107e-05	-3.86245e-11	-1.18389e-06	1.97149e-11	-1.12486e-06	-1.04168e-11	1.33898e-11
map-data-2021.01.25-17.48.04.912_0442.jpk-force	442	2.07031e-06	-1.99219e-06	-7.13793e-09	1.08509e-05	1.32378e-11	-6.19715e-05	-5.99963e-11	-2.15903e-06	1.69514e-12	-2.0636e-06	-3.13406e-11	1.4198e-11
map-data-2021.01.25-17.48.04.912_0443.jpk-force	443	2.14844e-06	-1.99219e-06	-7.09965e-09	1.06223e-05	1.50985e-11	-5.23495e-05	-3.93781e-11	-1.06843e-06	1.71184e-11	-9.41711e-07	-1.0807e-11	1.31754e-11
map-data-2021.01.25-17.48.04.912_0444.jpk-force	444	2.22656e-06	-1.99219e-06	-7.1117e-09	1.04466e-05	2.32973e-11	-4.96461e-05	-1.43208e-11	-9.49207e-07	1.99351e-11	-9.19528e-07	-8.7628e-13	7.53549e-12
map-data-2021.01.25-17.48.04.912_0445.jpk-force	445	2.30469e-06	-1.99219e-06	-7.22388e-09	1.03105e-05	1.66072e-11	-5.97621e-05	-1.41954e-11	-9.25704e-07	1.65764e-11	-9.14366e-07	-1.47344e-12	7.5722e-12
map-data-2021.01.25-17.48.04.912_0446.jpk-force	446	2.38281e-06	-1.99219e-06	-7.29071e-09	1.15339e-05	1.48439e-11	-6.35111e-05	-1.32645e-11	-9.61749e-07	2.37748e-11	-9.43074e-07	8.15331e-12	7.05749e-12
map-data-2021.01.25-17.48.04.912_0447.jpk-force	447	2.46094e-06	-1.99219e-06	-7.30272e-09	1.17947e-05	2.11087e-11	-7.44414e-05	-8.21497e-12	-9.59506e-07	1.74225e-11	-9.40164e-07	1.91779e-12	4.84885e-12
map-data-2021.01.25-17.48.04.912_0448.jpk-force	448	2.46094e-06	-1.91406e-06	-7.25252e-09	1.16577e-05	1.02054e-11	-7.87686e-05	-1.28166e-11	-9.3228e-07	1.72391e-11	-9.28612e-07	1.18654e-12	7.34439e-12
map-data-2021.01.25-17.48.04.912_0449.jpk-force	449	2.38281e-06	-1.91406e-06	-7.22585e-09	1.15887e-05	9.57936e-12	-7.73137e-05	-1.29388e-11	-9.11732e-07	1.69075e-11	-9.42745e-07	4.95962e-12	7.45548e-12
map-data-2021.01.25-17.48.04.912_0450.jpk-force	450	2.30469e-06	-1.91406e-06	-7.22063e-09	1.18979e-05	8.0666e-12	-7.74718e-05	-1.3265e-11	-9.38078e-07	1.75186e-11	-9.42414e-07	2.04058e-12	7.73442e-12
map-data-2021.01.25-17.48.04.912_0451.jpk-force	451	2.22656e-06	-1.91406e-06	-7.22378e-09	1.13513e-05	1.45376e-11	-6.75411e-05	-1.93946e-11	-9.23976e-07	1.54274e-11	-9.18974e-07	1.34998e-12	7.45511e-12
map-data-2021.01.25-17.48.04.912_0452.jpk-force	452	2.14844e-06	-1.91406e-06	-7.2154e-09	1.01797e-05	5.06291e-11	-4.60782e-05	-4.61379e-11	4.55264e-07	1.51959e-11	5.40971e-07	-1.91001e-11	1.72895e-11
map-data-2021.01.25-17.48.04.912_0453.jpk-force	453	2.07031e-06	-1.91406e-06	-7.16873e-09	1.07089e-05	1.29844e-11	-5.53257e-05	-4.95009e-11	-9.10401e-07	7.6197e-12	-8.08688e-07	-2.08475e-11	1.22387e-11
map-data-2021.01.25-17.48.04.912_0454.jpk-force	454	1.99219e-06	-1.91406e-06	-7.18156e-09	1.08991e-05	1.55801e-11	-4.84628e-05	-4.60735e-12	-5.84577e-07	1.6884e-11	-5.88245e-07	4.91083e-12	6.50267e-12
map-data-2021.01.25-17.48.04.912_0455.jpk-force	455	1.91406e-06	-1.91406e-06	-7.16587e-09	1.06897e-05	2.0767e-11	-2.949e-05	-1.76064e-11	-5.98929e-07	6.80347e-12	-5.91926e-07	-4.31909e-12	6.07544e-12
map-data-2021.01.25-17.48.04.912_0456.jpk-force	456	1.83594e-06	-1.91406e-06	-7.16776e-09	1.03468e-05	2.0596e-11	-5.27094e-05	-1.31717e-11	-5.8453e-07	7.84041e-12	-6.04205e-07	-3.32486e-12	4.29641e-12
map-data-2021.01.25-17.48.04.912_0457.jpk-force	457	1.75781e-06	-1.91406e-06	-7.17612e-09	9.2756e-06	7.6919e-11	-5.1735e-05	-7.43018e-11	7.38853e-07	1.67832e-11	7.63198e-07	-6.59061e-12	1.90299e-11
map-data-2021.01.25-17.48.04.912_0458.jpk-force	458	1.67969e-06	-1.91406e-06	-7.15137e-09	1.00275e-05	1.61755e-11	-5.02652e-05	-1.41843e-11	-6.69868e-08	2.44472e-11	-3.43046e-08	2.19961e-12	8.08003e-12
map-data-2021.01.25-17.48.04.912_0459.jpk-force	459	1.60156e-06	-1.91406e-06	-7.15526e-09	1.03608e-05	2.23473e-11	-4.08121e-05	-1.56542e-11	-7.27414e-07	8.77988e-12	-7.22412e-07	-3.73347e-13	6.02654e-12
map-data-2021.01.25-17.48.04.912_0460.jpk-force	460	1.52344e-06	-1.91406e-06	-7.1226e-09	9.9647e-06	1.7926e-11	-6.18403e-05	-1.94124e-11	-7.39864e-07	2.41582e-11	-7.35195e-07	-5.33303e-13	1.01698e-11
map-data-2021.01.25-17.48.04.912_0461.jpk-force	461	1.44531e-06	-1.91406e-06	-7.21243e-09	9.6575e-06	5.86918e-11	-3.33822e-05	-6.32929e-11	5.10197e-10	1.63981e-11	1.88518e-08	-2.18741e-11	2.39251e-11
map-data-2021.01.25-17.48.04.912_0462.jpk-force	462	1.36719e-06	-1.91406e-06	-7.19491e-09	1.10211e-05	1.79454e-11	-4.60321e-05	-9.70344e-12	-8.65056e-07	1.84213e-11	-8.74727e-07	1.21762e-12	7.29357e-12
map-data-2021.01.25-17.48.04.912_0463.jpk-force	463	1.28906e-06	-1.91406e-06	-7.15722e-09	1.02078e-05	2.03726e-11	-4.75027e-05	-9.42859e-12	-9.35614e-07	1.73711e-11	-9.43285e-07	2.40886e-12	6.82577e-12
map-data-2021.01.25-17.48.04.912_0464.jpk-force	464	1.21094e-06	-1.91406e-06	-7.1614e-09	1.03801e-05	1.93119e-11	-4.88543e-05	-1.3005e-11	-9.35696e-07	1.5339e-11	-9.29694e-07	2.05434e-12	7.84202e-12
map-data-2021.01.25-17.48.04.912_0465.jpk-force	465	1.13281e-06	-1.91406e-06	-7.17475e-09	1.04289e-05	1.61581e-11	-5.2379e-05	-9.28061e-12	-9.39956e-07	1.69079e-11	-9.28618e-07	2.75693e-12	6.4959e-12
map-data-2021.01.25-17.48.04.912_0466.jpk-force	466	1.05469e-06	-1.91406e-06	-7.17626e-09	1.05035e-05	1.84035e-11	-5.24722e-05	-1.94668e-11	-9.32902e-07	1.33695e-11	-9.29567e-07	-1.61754e-12	7.98936e-12
map-data-2021.01.25-17.48.04.912_0467.jpk-force	467	9.76563e-07	-1.91406e-06	-7.16798e-09	1.02447e-05	1.61773e-11	-5.37993e-05	-1.19473e-11	-9.35014e-07	2.37123e-11	-9.28678e-07	3.73154e-12	9.86777e-12
map-data-2021.01.25-17.48.04.912_0468.jpk-force	468	8.98437e-07	-1.91406e-06	-7.16081e-09	1.01849e-05	-8.05727e-12	-7.20917e-05	-4.85846e-11	-2.44737e-06	2.43647e-11	-2.37394e-06	-1.25432e-11	1.53e-11
map-data-2021.01.25-17.48.04.912_0469.jpk-force	469	8.20312e-07	-1.91406e-06	-7.17045e-09	9.88198e-06	2.68261e-11	-4.70323e-05	-1.0876e-11	-3.86614e-08	1.12483e-11	-4.36637e-08	4.61537e-13	6.93684e-12
map-data-2021.01.25-17.48.04.912_0470.jpk-force	470	7.42187e-07	-1.91406e-06	-7.15187e-09	1.03387e-05	1.69537e-11	-4.62858e-05	-1.30195e-11	-3.85019e-08	5.84033e-12	-4.28372e-08	-1.64412e-12	5.93888e-12
map-data-2021.01.25-17.48.04.912_0471.jpk-force	471	6.64062e-07	-1.91406e-06	-7.14871e-09	1.02008e-05	-4.15868e-12	-6.13674e-05	-3.70202e-11	-2.77021e-06	1.52342e-11	-2.66142e-06	-8.6574e-12	1.30143e-11
map-data-2021.01.25-17.48.04.912_0472.jpk-force	472	5.85938e-07	-1.91406e-06	-7.15728e-09	1.01234e-05	-1.14475e-11	-6.61393e-05	-1.39929e-11	-2.65524e-06	2.45809e-11	-2.75101e-06	6.72758e-12	7.5537e-12
map-data-2021.01.25-17.48.04.912_0473.jpk-force	473	5.07813e-07	-1.91406e-06	-7.15837e-09	1.03928e-05	9.39834e-12	-6.86075e-05	-2.13108e-11	-1.07844e-06	1.6632e-11	-1.07277e-06	-1.93939e-12	7.32072e-12
map-data-2021.01.25-17.48.04.912_0474.jpk-force	474	4.29687e-07	-1.91406e-06	-7.14911e-09	1.02465e-05	1.55776e-11	-5.51325e-05	-1.62803e-11	-1.0828e-06	1.84088e-11	-1.03345e-06	-3.69068e-12	7.10983e-12
map-data-2021.01.25-17.48.04.912_0475.jpk-force	475	3.51563e-07	-1.91406e-06	-7.14405e-09	1.01994e-05	-1.98831e-11	-6.62323e-05	-4.69549e-11	-2.60364e-06	2.13097e-11	-2.45346e-06	-3.46252e-12	1.38503e-11
map-data-2021.01.25-17.48.04.912_0476.jpk-force	476	2.73438e-07	-1.91406e-06	-7.18484e-09	1.01452e-05	3.75545e-11	-5.54421e-05	-1.55979e-11	-2.47436e-06	2.86097e-11	-2.53377e-06	8.07888e-12	8.12173e-12
map-data-2021.01.25-17.48.04.912_0477.jpk-force	477	1.95312e-07	-1.91406e-06	-7.17926e-09	1.10019e-05	8.53623e-12	-5.44824e-05	-1.67949e-11	-2.52672e-06	2.73966e-11	-2.54607e-06	5.23946e-12	9.13804e-12
map-data-2021.01.25-17.48.04.912_0478.jpk-force	478	1.17187e-07	-1.91406e-06	-7.1528e-09	1.034e-05	7.8017e-12	-5.77385e-05	-2.09428e-11	-2.56024e-06	2.79113e-11	-2.46446e-06	1.23813e-12	7.91682e-12
map-data-2021.01.25-17.48.04.912_0479.jpk-force	479	3.90618e-08	-1.91406e-06	-7.16569e-09	1.00951e-05	6.84136e-11	-3.80808e-05	-2.02888e-11	-1.13474e-06	2.26387e-11	-1.15309e-06	-1.55046e-12	9.20368e-12
map-data-2021.01.25-17.48.04.912_0480.jpk-force	480	-3.90623e-08	-1.91406e-06	-7.17995e-09	9.83904e-06	1.2047e-11	-6.40822e-05	-2.13199e-11	-1.11504e-06	2.33053e-11	-1.11104e-06	1.82537e-14	8.54706e-12
map-data-2021.01.25-17.48.04.912_0481.jpk-force	481	-1.17187e-07	-1.91406e-06	-7.17272e-09	1.05648e-05	1.31651e-11	-7.32035e-05	-6.1346e-11	-2.33033e-06	-1.9103e-12	-2.25658e-06	-3.20065e-11	1.34677e-11
map-data-2021.01.25-17.48.04.912_0482.jpk-force	482	-1.95313e-07	-1.91406e-06	-7.17011e-09	1.03648e-05	7.82653e-12	-5.88082e-05	-1.2484e-11	-1.74276e-06	1.26862e-11	-1.76311e-06	-4.23479e-13	6.56507e-12
map-data-2021.01.25-17.48.04.912_0483.jpk-force	483	-2.73438e-07	-1.91406e-06	-7.21433e-09	1.02362e-05	-8.33624e-12	-7.37553e-05	-1.36927e-11	-1.73095e-06	1.74846e-11	-1.72561e-06	-1.03764e-12	7.78492e-12
map-data-2021.01.25-17.48.04.912_0484.jpk-force	484	-3.51563e-07	-1.91406e-06	-7.1643e-09	9.19019e-06	3.60252e-11	-5.74968e-05	-3.27356e-12	-1.73136e-06	3.55895e-11	-1.74972e-06	1.45446e-11	8.34171e-12
map-data-2021.01.25-17.48.04.912_0485.jpk-force	485	-4.29688e-07	-1.91406e-06	-7.15911e-09	1.01566e-05	-1.51648e-13	-6.25647e-05	-1.70712e-11	-1.75471e-06	1.87559e-11	-1.72368e-06	1.04605e-12	8.89207e-12
map-data-2021.01.25-17.48.04.912_0486.jpk-force	486	-5.07813e-07	-1.91406e-06	-7.17395e-09	1.02214e-05	-3.14148e-12	-6.56842e-05	-3.74397e-11	-2.6425e-06	1.26418e-11	-2.60379e-06	-1.18093e-11	1.04333e-11
map-data-2021.01.25-17.48.04.912_0487.jpk-force	487	-5.85938e-07	-1.91406e-06	-7.16493e-09	1.02386e-05	-1.78228e-11	-6.22556e-05	-1.52392e-11	-2.66721e-06	3.83014e-11	-2.67388e-06	9.72262e-12	8.57617e-12
map-data-2021.01.25-17.48.04.912_0488.jpk-force	488	-6.64063e-07	-1.91406e-06	-7.17463e-09	1.01291e-05	-5.77804e-13	-6.58514e-05	-7.76655e-12	-2.61112e-06	2.86152e-11	-2.66985e-06	1.04013e-11	8.67743e-12
map-data-2021.01.25-17.48.04.912_0489.jpk-force	489	-7.42187e-07	-1.91406e-06	-7.16661e-09	1.017e-05	7.41909e-12	-5.7426e-05	-8.8321e-12	-2.60639e-06	2.8971e-11	-2.69015e-06	1.06655e-11	8.65065e-12
map-data-2021.01.25-17.48.04.912_0490.jpk-force	490	-8.20313e-07	-1.91406e-06	-7.14267e-09	1.01609e-05	6.98686e-12	-5.48381e-05	-1.56139e-11	-2.65339e-06	2.67575e-11	-2.66073e-06	4.45492e-12	8.51527e-12
map-data-2021.01.25-17.48.04.912_0491.jpk-force	491	-8.98437e-07	-1.91406e-06	-7.13629e-09	1.00778e-05	-1.15035e-11	-6.50379e-05	-1.15681e-11	-1.43444e-06	9.56609e-12	-1.45179e-06	-2.00539e-12	4.75439e-12
map-data-2021.01.25-17.48.04.912_0492.jpk-force	492	-9.76563e-07	-1.91406e-06	-7.15851e-09	1.0088e-05	3.20339e-12	-6.21319e-05	-1.68073e-11	-1.4309e-06	1.99442e-11	-1.45058e-06	-2.59678e-13	9.28544e-12
map-data-2021.01.25-17.48.04.912_0493.jpk-force	493	-1.05469e-06	-1.91406e-06	-7.21411e-09	1.02296e-05	4.24703e-12	-5.79526e-05	-7.47975e-12	-1.44063e-06	1.05942e-11	-1.44864e-06	1.06255e-12	3.79034e-12
map-data-2021.01.25-17.48.04.912_0494.jpk-force	494	-1.13281e-06	-1.91406e-06	-7.1647e-09	1.04303e-05	2.81411e-11	-3.9325e-05	-4.76152e-11	-1.82071e-06	2.02313e-11	-1.74832e-06	-2.27222e-11	1.4654e-11
map-data-2021.01.25-17.48.04.912_0495.jpk-force	495	-1.21094e-06	-1.91406e-06	-7.23961e-09	1.04871e-05	3.06174e-12	-7.00411e-05	-1.87763e-11	-1.76645e-06	2.7733e-11	-1.76145e-06	2.81591e-12	9.3692e-12
map-data-2021.01.25-17.48.04.912_0496.jpk-force	496	-1.28906e-06	-1.91406e-06	-7.20688e-09	1.09326e-05	5.80643e-12	-5.10166e-05	-1.76203e-11	-1.80818e-06	1.77911e-11	-1.80084e-06	-2.87448e-12	7.614e-12
map-data-2021.01.25-17.48.04.912_0497.jpk-force	497	-1.36719e-06	-1.91406e-06	-7.18589e-09	1.02529e-05	1.51928e-11	-5.22699e-05	-4.90712e-12	-1.75364e-06	2.57613e-11	-1.83972e-06	1.16654e-11	7.20189e-12
map-data-2021.01.25-17.48.04.912_0498.jpk-force	498	-1.44531e-06	-1.91406e-06	-7.2235e-09	9.96513e-06	3.61559e-11	-4.47267e-05	-5.01365e-11	1.4079e-07	1.95301e-11	1.7614e-07	-2.04446e-11	1.79196e-11
map-data-2021.01.25-17.48.04.912_0499.jpk-force	499	-1.52344e-06	-1.91406e-06	-7.21555e-09	1.12408e-05	1.60705e-11	-4.40697e-05	-1.62994e-11	1.21974e-07	1.33581e-11	1.26309e-07	-8.61163e-13	6.50323e-12
map-data-2021.01.25-17.48.04.912_0500.jpk-force	500	-1.60156e-06	-1.91406e-06	-7.19357e-09	9.37435e-06	6.13255e-11	-3.5043e-05	-1.5183e-11	1.32852e-06	1.57721e-11	1.33919e-06	-1.96273e-12	7.6651e-12
map-data-2021.01.25-17.48.04.912_0501.jpk-force	501	-1.67969e-06	-1.91406e-06	-7.18802e-09	1.07518e-05	1.34671e-11	-5.98355e-05	-8.41463e-11	-1.52101e-06	7.19528e-12	-1.38326e-06	-3.1718e-11	2.97737e-11
map-data-2021.01.25-17.48.04.912_0502.jpk-force	502	-1.75781e-06	-1.91406e-06	-7.19574e-09	1.08203e-05	2.00391e-11	-4.17715e-05	-8.02819e-12	-1.47033e-06	3.1145e-11	-1.47534e-06	8.90716e-12	7.55084e-12
map-data-2021.01.25-17.48.04.912_0503.jpk-force	503	-1.83594e-06	-1.91406e-06	-7.19267e-09	8.76242e-06	9.90899e-11	-4.72463e-05	-1.51501e-11	1.53317e-06	1.47027e-11	1.56685e-06	-1.24335e-12	6.62173e-12
map-data-2021.01.25-17.48.04.912_0504.jpk-force	504	-1.91406e-06	-1.91406e-06	-7.18809e-09	1.0778e-05	2.0885e-11	-4.66151e-05	-4.55371e-11	-2.07202e-06	1.56869e-11	-2.03598e-06	-8.80507e-12	1.90119e-11
map-data-2021.01.25-17.48.04.912_0505.jpk-force	505	-1.99219e-06	-1.91406e-06	-7.20022e-09	1.06108e-05	1.25073e-11	-5.41566e-05	-8.64116e-12	-2.0421e-06	1.94725e-11	-2.03509e-06	3.5558e-12	7.23007e-12
map-data-2021.01.25-17.48.04.912_0506.jpk-force	506	-2.07031e-06	-1.91406e-06	-7.21099e-09	1.09378e-05	-4.44364e-12	-5.88702e-05	-1.40952e-11	-2.02806e-06	1.85543e-11	-2.02206e-06	2.89179e-12	8.26815e-12
map-data-2021.01.25-17.48.04.912_0507.jpk-force	507	-2.14844e-06	-1.91406e-06	-7.19499e-09	1.07525e-05	1.09434e-11	-5.04764e-05	-1.85663e-11	-2.06449e-06	2.16607e-11	-2.06015e-06	2.97643e-12	9.87689e-12
map-data-2021.01.25-17.48.04.912_0508.jpk-force	508	-2.22656e-06	-1.91406e-06	-7.19857e-09	1.06998e-05	1.02769e-11	-5.57133e-05	-5.1308e-11	-2.20083e-06	2.31928e-11	-2.19382e-06	-1.96175e-11	1.61823e-11
map-data-2021.01.25-17.48.04.912_0509.jpk-force	509	-2.30469e-06	-1.91406e-06	-7.2013e-09	1.06035e-05	-5.36154e-12	-6.29885e-05	-3.52687e-11	-1.47729e-06	2.26534e-11	-1.38991e-06	-7.16031e-12	1.25225e-11
map-data-2021.01.25-17.48.04.912_0510.jpk-force	510	-2.38281e-06	-1.91406e-06	-7.21123e-09	1.06493e-05	1.53623e-11	-5.54376e-05	-1.31673e-11	-1.12209e-06	1.80699e-11	-1.12609e-06	1.19065e-12	6.74718e-12
map-data-2021.01.25-17.48.04.912_0511.jpk-force	511	-2.46094e-06	-1.91406e-06	-7.27998e-09	1.10137e-05	4.66502e-11	-5.81801e-05	-1.65015e-11	-1.94948e-06	2.03556e-11	-1.94414e-06	2.29671e-13	8.7905e-12
map-data-2021.01.25-17.48.04.912_0512.jpk-force	512	-2.46094e-06	-1.83594e-06	-7.27376e-09	1.14927e-05	-6.12075e-11	-9.85101e-05	-1.34117e-11	-1.92207e-06	1.79098e-11	-1.93008e-06	3.72427e-13	7.51389e-12
map-data-2021.01.25-17.48.04.912_0513.jpk-force	513	-2.38281e-06	-1.83594e-06	-7.23379e-09	1.12621e-05	4.88781e-12	-6.16696e-05	-1.77495e-11	-1.92737e-06	1.90715e-11	-1.9554e-06	-1.0299e-12	8.94686e-12
map-data-2021.01.25-17.48.04.912_0514.jpk-force	514	-2.30469e-06	-1.83594e-06	-7.22128e-09	1.10209e-05	2.70372e-11	-4.08807e-05	-3.38252e-12	-1.95019e-06	2.43642e-11	-1.91716e-06	9.49842e-12	6.37499e-12
map-data-2021.01.25-17.48.04.912_0515.jpk-force	515	-2.22656e-06	-1.83594e-06	-7.21281e-09	1.0919e-05	-1.1642e-11	-6.65396e-05	-4.92243e-11	-2.36956e-06	2.44325e-11	-2.29647e-06	-1.14469e-11	1.4474e-11
map-data-2021.01.25-17.48.04.912_0516.jpk-force	516	-2.14844e-06	-1.83594e-06	-7.21369e-09	1.09799e-05	-5.7372e-12	-5.97303e-05	-1.79384e-11	-1.84387e-06	1.41202e-11	-1.85221e-06	-2.40036e-12	9.19833e-12
map-data-2021.01.25-17.48.04.912_0517.jpk-force	517	-2.07031e-06	-1.83594e-06	-7.26378e-09	1.09342e-05	4.16019e-11	-5.72827e-05	-5.22982e-11	-2.53422e-06	2.68133e-11	-2.50085e-06	-1.10313e-11	1.55371e-11
map-data-2021.01.25-17.48.04.912_0518.jpk-force	518	-1.99219e-06	-1.83594e-06	-7.23585e-09	1.12266e-05	-4.7829e-11	-7.74092e-05	-5.86867e-11	-2.61727e-06	1.52152e-11	-2.45373e-06	-2.30167e-11	2.19456e-11
map-data-2021.01.25-17.48.04.912_0519.jpk-force	519	-1.91406e-06	-1.83594e-06	-7.21916e-09	1.0775e-05	2.0108e-11	-4.78318e-05	-1.28535e-11	-6.23609e-07	2.06014e-11	-6.56957e-07	2.17619e-13	7.03448e-12
map-data-2021.01.25-17.48.04.912_0520.jpk-force	520	-1.83594e-06	-1.83594e-06	-7.21392e-09	1.08167e-05	-1.18246e-10	-0.00010487	-4.79286e-11	-2.75844e-06	1.63712e-11	-2.73808e-06	-1.51752e-11	1.67432e-11
map-data-2021.01.25-17.48.04.912_0521.jpk-force	521	-1.75781e-06	-1.83594e-06	-7.2042e-09	1.05636e-05	1.38955e-11	-4.87528e-05	-6.08242e-11	-2.06962e-06	1.42908e-11	-1.99854e-06	-2.5498e-11	1.62816e-11
map-data-2021.01.25-17.48.04.912_0522.jpk-force	522	-1.67969e-06	-1.83594e-06	-7.20326e-09	9.83344e-06	5.18879e-11	-4.9463e-05	-5.59378e-11	4.994e-10	1.73855e-11	9.78742e-08	-2.07854e-11	1.73775e-11
map-data-2021.01.25-17.48.04.912_0523.jpk-force	523	-1.60156e-06	-1.83594e-06	-7.1731e-09	1.02623e-05	1.58663e-11	-4.93559e-05	-1.8017e-11	3.72329e-08	2.00365e-11	9.62597e-08	6.19931e-13	7.64619e-12
map-data-2021.01.25-17.48.04.912_0524.jpk-force	524	-1.52344e-06	-1.83594e-06	-7.19977e-09	1.04616e-05	7.04402e-13	-5.97208e-05	-4.12217e-11	-1.99201e-06	1.33213e-11	-2.08811e-06	-1.25647e-11	1.15055e-11
map-data-2021.01.25-17.48.04.912_0525.jpk-force	525	-1.44531e-06	-1.83594e-06	-7.18815e-09	1.0719e-05	1.83406e-11	-4.35476e-05	-1.142e-11	-2.01605e-06	2.70105e-11	-2.0334e-06	9.08502e-12	8.19293e-12
map-data-2021.01.25-17.48.04.912_0526.jpk-force	526	-1.36719e-06	-1.83594e-06	-7.17514e-09	1.04696e-05	1.44037e-11	-5.01626e-05	-1.79295e-11	-1.09179e-06	1.60827e-11	-1.11013e-06	-8.52959e-13	7.39652e-12
map-data-2021.01.25-17.48.04.912_0527.jpk-force	527	-1.28906e-06	-1.83594e-06	-7.18132e-09	1.0603e-05	-1.91267e-11	-6.6844e-05	-1.05997e-11	-1.12834e-06	2.00328e-11	-1.08666e-06	4.27268e-12	7.22558e-12
map-data-2021.01.25-17.48.04.912_0528.jpk-force	528	-1.21094e-06	-1.83594e-06	-7.18291e-09	1.03e-05	2.46474e-11	-4.50439e-05	-4.12021e-11	-1.57025e-06	1.59881e-11	-1.56491e-06	-1.6733e-11	1.26017e-11
map-data-2021.01.25-17.48.04.912_0529.jpk-force	529	-1.13281e-06	-1.83594e-06	-7.17777e-09	1.06662e-05	1.35165e-11	-5.29944e-05	-1.13717e-11	-1.57232e-06	1.57006e-11	-1.58967e-06	6.53112e-13	6.47582e-12
map-data-2021.01.25-17.48.04.912_0530.jpk-force	530	-1.05469e-06	-1.83594e-06	-7.18181e-09	1.02793e-05	-8.75316e-11	-0.000105248	-5.37826e-11	-2.65153e-06	1.30721e-11	-2.63351e-06	-1.94816e-11	1.36749e-11
map-data-2021.01.25-17.48.04.912_0531.jpk-force	531	-9.76563e-07	-1.83594e-06	-7.15607e-09	1.02908e-05	-1.74711e-11	-5.72722e-05	-1.69292e-11	-1.84395e-06	2.20107e-11	-1.85263e-06	3.17915e-12	8.86064e-12
map-data-2021.01.25-17.48.04.912_0532.jpk-force	532	-8.98437e-07	-1.83594e-06	-7.19055e-09	1.07356e-05	1.43053e-11	-4.77676e-05	-4.57821e-11	-2.27879e-06	1.05473e-11	-2.27178e-06	-1.0363e-11	1.11408e-11
map-data-2021.01.25-17.48.04.912_0533.jpk-force	533	-8.20313e-07	-1.83594e-06	-7.18962e-09	1.04366e-05	1.45951e-11	-5.04759e-05	-1.76872e-11	-1.51266e-06	2.7027e-11	-1.53134e-06	-1.24022e-12	9.20824e-12
map-data-2021.01.25-17.48.04.912_0534.jpk-force	534	-7.42187e-07	-1.83594e-06	-7.18858e-09	1.05239e-05	2.8751e-11	-4.60245e-05	-1.9858e-11	-1.58415e-06	2.2414e-11	-1.5668e-06	2.48205e-12	9.03888e-12
map-data-2021.01.25-17.48.04.912_0535.jpk-force	535	-6.64063e-07	-1.83594e-06	-7.21398e-09	1.12607e-05	1.48614e-11	-5.26439e-05	-1.50279e-11	-1.61515e-06	1.84383e-11	-1.62016e-06	4.81067e-13	6.70805e-12
map-data-2021.01.25-17.48.04.912_0536.jpk-force	536	-5.85938e-07	-1.83594e-06	-7.2565e-09	1.08433e-05	-4.76909e-12	-7.62836e-05	-1.69372e-11	-1.6153e-06	2.15063e-11	-1.56526e-06	3.90452e-13	7.09076e-12
map-data-2021.01.25-17.48.04.912_0537.jpk-force	537	-5.07813e-07	-1.83594e-06	-7.20099e-09	1.08917e-05	-6.09747e-12	-6.49644e-05	-1.71164e-11	-1.58632e-06	2.19504e-11	-1.60433e-06	9.38998e-13	9.12939e-12
map-data-2021.01.25-17.48.04.912_0538.jpk-force	538	-4.29688e-07	-1.83594e-06	-7.17447e-09	1.03374e-05	9.05683e-12	-5.45894e-05	-1.44223e-11	-1.56505e-06	2.02925e-11	-1.58339e-06	-6.99258e-14	8.01015e-12
map-data-2021.01.25-17.48.04.912_0539.jpk-force	539	-3.51563e-07	-1.83594e-06	-7.19225e-09	1.02436e-05	2.60238e-11	-5.48848e-05	-5.29103e-11	-1.47921e-06	1.41244e-11	-1.43818e-06	-1.83314e-11	1.49001e-11
map-data-2021.01.25-17.48.04.912_0540.jpk-force	540	-2.73438e-07	-1.83594e-06	-7.20843e-09	1.05158e-05	1.52009e-11	-5.36113e-05	-4.69419e-11	-2.75485e-06	2.7674e-11	-2.67275e-06	-4.17103e-12	1.43075e-11
map-data-2021.01.25-17.48.04.912_0541.jpk-force	541	-1.95313e-07	-1.83594e-06	-7.18789e-09	1.03819e-05	1.68773e-11	-4.72064e-05	-9.01029e-12	-1.42663e-06	2.06229e-11	-1.40695e-06	5.38776e-12	8.64576e-12
map-data-2021.01.25-17.48.04.912_0542.jpk-force	542	-1.17188e-07	-1.83594e-06	-7.17866e-09	1.02617e-05	7.72886e-12	-5.12958e-05	-1.23858e-11	-1.41567e-06	1.23164e-11	-1.41266e-06	-7.767e-13	5.84319e-12
map-data-2021.01.25-17.48.04.912_0543.jpk-force	543	-3.90635e-08	-1.83594e-06	-7.15502e-09	1.03005e-05	2.72459e-11	-2.56403e-05	-2.2883e-12	-1.4117e-06	2.81843e-11	-1.40803e-06	1.10199e-11	7.22909e-12
map-data-2021.01.25-17.48.04.912_0544.jpk-force	544	3.90618e-08	-1.83594e-06	-7.17601e-09	9.99844e-06	4.91527e-11	-9.90239e-05	-1.37936e-11	-1.28684e-06	2.85948e-11	-1.32955e-06	2.08236e-12	7.96593e-12
map-data-2021.01.25-17.48.04.912_0545.jpk-force	545	1.17188e-07	-1.83594e-06	-7.23526e-09	1.06802e-05	1.76183e-11	-6.96272e-05	-1.45295e-11	-9.71377e-07	1.25581e-11	-9.66375e-07	-2.08146e-12	5.89486e-12
map-data-2021.01.25-17.48.04.912_0546.jpk-force	546	1.95312e-07	-1.83594e-06	-7.18596e-09	1.05215e-05	1.28981e-11	-5.16228e-05	-1.87306e-11	-9.77075e-07	1.00938e-11	-9.94416e-07	1.95686e-13	6.42094e-12
map-data-2021.01.25-17.48.04.912_0547.jpk-force	547	2.73438e-07	-1.83594e-06	-7.16536e-09	1.07943e-05	1.29336e-11	-5.06447e-05	-4.94995e-11	-2.56354e-06	9.70733e-12	-2.38699e-06	-2.65821e-11	1.37144e-11
map-data-2021.01.25-17.48.04.912_0548.jpk-force	548	3.51562e-07	-1.83594e-06	-7.18798e-09	1.05364e-05	2.63181e-11	-4.4824e-05	-7.36952e-12	-2.56448e-06	5.80252e-11	-2.4777e-06	2.88052e-11	1.27343e-11
map-data-2021.01.25-17.48.04.912_0549.jpk-force	549	4.29686e-07	-1.83594e-06	-7.24304e-09	1.06774e-05	1.72397e-11	-6.04173e-05	-8.1185e-12	-1.02261e-06	7.4463e-12	-1.01961e-06	-1.87303e-12	4.21285e-12
map-data-2021.01.25-17.48.04.912_0550.jpk-force	550	5.07812e-07	-1.83594e-06	-7.20903e-09	1.06438e-05	-2.03619e-11	-5.85216e-05	-4.12216e-11	-2.57381e-06	1.71521e-11	-2.55645e-06	-1.53418e-11	1.07882e-11
map-data-2021.01.25-17.48.04.912_0551.jpk-force	551	5.85936e-07	-1.83594e-06	-7.16893e-09	1.0738e-05	1.40637e-11	-5.54216e-05	-1.64922e-11	-2.58693e-06	2.26642e-11	-2.68371e-06	1.97747e-12	8.30288e-12
map-data-2021.01.25-17.48.04.912_0552.jpk-force	552	6.64062e-07	-1.83594e-06	-7.19212e-09	1.06728e-05	-4.10219e-12	-6.28696e-05	-1.3209e-11	-1.63975e-06	2.08871e-11	-1.65777e-06	4.65564e-12	6.73219e-12
map-data-2021.01.25-17.48.04.912_0553.jpk-force	553	7.42187e-07	-1.83594e-06	-7.21201e-09	1.06403e-05	2.17916e-11	-4.99982e-05	-1.97982e-11	-1.78188e-06	2.00669e-11	-1.77687e-06	-9.58285e-13	8.05799e-12
map-data-2021.01.25-17.48.04.912_0554.jpk-force	554	8.20312e-07	-1.83594e-06	-7.2205e-09	1.0579e-05	-2.94014e-11	-7.3098e-05	-1.97523e-11	-1.83644e-06	2.06019e-11	-1.8291e-06	-1.95722e-12	8.73734e-12
map-data-2021.01.25-17.48.04.912_0555.jpk-force	555	8.98437e-07	-1.83594e-06	-7.21484e-09	1.06848e-05	2.2892e-11	-4.59487e-05	-1.55019e-11	-1.88806e-06	1.53951e-11	-1.88506e-06	9.77943e-14	7.32583e-12
map-data-2021.01.25-17.48.04.912_0556.jpk-force	556	9.76562e-07	-1.83594e-06	-7.22787e-09	1.07121e-05	1.93936e-11	-4.90925e-05	-4.03477e-11	-2.55073e-06	1.84106e-11	-2.501e-06	-1.24071e-12	1.13331e-11
map-data-2021.01.25-17.48.04.912_0557.jpk-force	557	1.05469e-06	-1.83594e-06	-7.24019e-09	1.06182e-05	-5.2987e-12	-6.1507e-05	-1.13264e-11	-2.16495e-06	1.26858e-11	-2.14893e-06	1.0625e-12	5.99893e-12
map-data-2021.01.25-17.48.04.912_0558.jpk-force	558	1.13281e-06	-1.83594e-06	-7.22105e-09	1.04301e-05	5.17946e-12	-9.14831e-05	-1.822e-11	-5.32275e-07	1.24298e-11	-5.26606e-07	-1.59108e-12	6.07805e-12
map-data-2021.01.25-17.48.04.912_0559.jpk-force	559	1.21094e-06	-1.83594e-06	-7.28501e-09	1.05276e-05	2.19031e-11	-5.79413e-05	-1.50067e-11	-5.37214e-07	8.63959e-12	-5.33545e-07	-2.31501e-12	5.79752e-12
map-data-2021.01.25-17.48.04.912_0560.jpk-force	560	1.28906e-06	-1.83594e-06	-7.21623e-09	1.07478e-05	7.5525e-12	-6.24751e-05	-4.63572e-11	-1.46895e-06	2.20419e-11	-1.34822e-06	-1.18655e-11	1.50468e-11
map-data-2021.01.25-17.48.04.912_0561.jpk-force	561	1.36719e-06	-1.83594e-06	-7.25533e-09	9.87819e-06	5.30108e-11	-4.90632e-05	-5.41189e-11	3.65586e-10	9.93942e-12	2.37086e-08	-1.92894e-11	1.36868e-11
map-data-2021.01.25-17.48.04.912_0562.jpk-force	562	1.44531e-06	-1.83594e-06	-7.19733e-09	1.08253e-05	1.32247e-11	-3.93583e-05	-4.86328e-11	-2.38373e-06	2.1696e-11	-2.31098e-06	-1.728e-11	1.40338e-11
map-data-2021.01.25-17.48.04.912_0563.jpk-force	563	1.52344e-06	-1.83594e-06	-7.14163e-09	1.10228e-05	1.97831e-11	-5.31009e-05	-5.03842e-11	-9.33632e-07	8.69861e-12	-8.75274e-07	-2.10165e-11	1.23549e-11
map-data-2021.01.25-17.48.04.912_0564.jpk-force	564	1.60156e-06	-1.83594e-06	-7.23222e-09	1.08331e-05	5.92124e-11	-5.25969e-05	-3.81581e-11	-2.7073e-06	3.14175e-11	-2.63488e-06	-4.39803e-12	1.6152e-11
map-data-2021.01.25-17.48.04.912_0565.jpk-force	565	1.67969e-06	-1.83594e-06	-7.19665e-09	1.07815e-05	7.4896e-12	-5.62897e-05	-1.84056e-11	-1.71771e-06	1.33116e-11	-1.71204e-06	2.07925e-13	7.10668e-12
map-data-2021.01.25-17.48.04.912_0566.jpk-force	566	1.75781e-06	-1.83594e-06	-7.21125e-09	1.04878e-05	1.70559e-11	-5.91376e-05	-1.71675e-11	-1.70582e-06	1.98448e-11	-1.72417e-06	-5.46645e-12	7.69151e-12
map-data-2021.01.25-17.48.04.912_0567.jpk-force	567	1.83594e-06	-1.83594e-06	-7.23726e-09	1.07965e-05	-3.46329e-12	-5.52583e-05	-1.26576e-11	-1.72952e-06	1.86711e-11	-1.72518e-06	-1.35074e-12	7.2819e-12
map-data-2021.01.25-17.48.04.912_0568.jpk-force	568	1.91406e-06	-1.83594e-06	-7.22534e-09	1.08475e-05	2.76109e-11	-5.00931e-05	-1.12637e-11	-1.66157e-06	1.41698e-11	-1.65857e-06	-5.09767e-13	6.78297e-12
map-data-2021.01.25-17.48.04.912_0569.jpk-force	569	1.99219e-06	-1.83594e-06	-7.23427e-09	1.06428e-05	1.29394e-11	-4.85047e-05	-3.62714e-11	-2.02829e-06	2.50607e-11	-2.02295e-06	-1.04153e-12	1.08004e-11
map-data-2021.01.25-17.48.04.912_0570.jpk-force	570	2.07031e-06	-1.83594e-06	-7.16728e-09	1.08661e-05	2.93749e-11	-3.73265e-05	-1.74607e-11	-2.0393e-06	1.46755e-11	-2.079e-06	1.28825e-12	7.6672e-12
map-data-2021.01.25-17.48.04.912_0571.jpk-force	571	2.14844e-06	-1.83594e-06	-7.21961e-09	1.09999e-05	4.71161e-12	-5.97349e-05	-1.88552e-11	-1.32799e-06	1.63131e-11	-1.346e-06	4.51497e-13	7.053e-12
map-data-2021.01.25-17.48.04.912_0572.jpk-force	572	2.22656e-06	-1.83594e-06	-7.26023e-09	1.0911e-05	2.15314e-12	-7.82475e-05	-1.62127e-11	-1.35394e-06	1.34642e-11	-1.31959e-06	9.22782e-13	6.84556e-12
map-data-2021.01.25-17.48.04.912_0573.jpk-force	573	2.30469e-06	-1.83594e-06	-7.26056e-09	1.13145e-05	1.23006e-12	-7.95255e-05	-1.32926e-11	-1.36707e-06	1.84736e-11	-1.33306e-06	2.33627e-13	6.43387e-12
map-data-2021.01.25-17.48.04.912_0574.jpk-force	574	2.38281e-06	-1.83594e-06	-7.1947e-09	1.05021e-05	1.38485e-11	-5.55447e-05	-1.6815e-11	-1.34994e-06	1.70051e-11	-1.36195e-06	-2.29745e-12	7.46902e-12
map-data-2021.01.25-17.48.04.912_0575.jpk-force	575	2.46094e-06	-1.83594e-06	-7.1748e-09	1.04599e-05	4.26734e-12	-5.7842e-05	-1.77355e-11	-1.35287e-06	2.13726e-11	-1.33419e-06	-8.27052e-13	8.849e-12
map-data-2021.01.25-17.48.04.912_0576.jpk-force	576	2.46094e-06	-1.75781e-06	-7.17707e-09	1.04964e-05	1.53539e-11	-5.45818e-05	-1.16847e-11	-1.41036e-06	1.70042e-11	-1.39768e-06	-5.89471e-13	6.86206e-12
map-data-2021.01.25-17.48.04.912_0577.jpk-force	577	2.38281e-06	-1.75781e-06	-7.16985e-09	1.06541e-05	1.02247e-11	-5.05433e-05	-5.38898e-12	-1.27445e-06	2.07521e-11	-1.26944e-06	5.03105e-12	7.08915e-12
map-data-2021.01.25-17.48.04.912_0578.jpk-force	578	2.30469e-06	-1.75781e-06	-7.18385e-09	1.05711e-05	1.6204e-11	-3.40441e-05	-1.28269e-11	-1.47144e-06	1.90271e-11	-1.47578e-06	8.50683e-14	1.00798e-11
map-data-2021.01.25-17.48.04.912_0579.jpk-force	579	2.22656e-06	-1.75781e-06	-7.17289e-09	1.08277e-05	1.64516e-11	-4.2372e-05	-1.3271e-11	-1.46923e-06	2.57424e-11	-1.47356e-06	5.64308e-12	1.2779e-11
map-data-2021.01.25-17.48.04.912_0580.jpk-force	580	2.14844e-06	-1.75781e-06	-7.22515e-09	1.10035e-05	-1.24322e-11	-6.47671e-05	-1.51677e-11	-1.47041e-06	1.01932e-11	-1.47507e-06	-9.70241e-13	7.66097e-12
map-data-2021.01.25-17.48.04.912_0581.jpk-force	581	2.07031e-06	-1.75781e-06	-7.18019e-09	1.12769e-05	2.66497e-11	-4.53318e-05	-1.20575e-11	-1.47181e-06	1.08187e-11	-1.47614e-06	-8.37736e-13	7.07758e-12
map-data-2021.01.25-17.48.04.912_0582.jpk-force	582	1.99219e-06	-1.75781e-06	-7.20161e-09	1.13366e-05	7.31632e-12	-5.40626e-05	-1.95923e-11	-1.46823e-06	1.28801e-11	-1.47523e-06	-1.31197e-12	1.2177e-11
map-data-2021.01.25-17.48.04.912_0583.jpk-force	583	1.91406e-06	-1.75781e-06	-7.19434e-09	1.04197e-05	2.28001e-11	-9.66134e-05	-5.19519e-11	-1.47324e-06	-2.77479e-11	-1.47691e-06	-4.00943e-11	6.82924e-12
map-data-2021.01.25-17.48.04.912_0584.jpk-force	584	1.83594e-06	-1.75781e-06	-7.21696e-09	1.18308e-05	-2.57649e-11	-6.80366e-05	-6.56687e-11	-2.18542e-06	1.35887e-11	-2.11367e-06	-2.89416e-11	2.06428e-11
map-data-2021.01.25-17.48.04.912_0585.jpk-force	585	1.75781e-06	-1.75781e-06	-7.21942e-09	1.19241e-05	1.08981e-11	-5.00772e-05	-1.40667e-11	-1.24891e-06	9.81216e-12	-1.24558e-06	-7.17098e-13	6.32505e-12
map-data-2021.01.25-17.48.04.912_0586.jpk-force	586	1.67969e-06	-1.75781e-06	-7.21815e-09	1.17908e-05	1.91634e-11	-4.6012e-05	-6.11271e-12	-2.18678e-07	1.86587e-11	-2.13676e-07	3.24043e-12	5.98818e-12
map-data-2021.01.25-17.48.04.912_0587.jpk-force	587	1.60156e-06	-1.75781e-06	-7.24333e-09	1.20527e-05	1.57651e-11	-4.32784e-05	-1.55133e-11	-2.18077e-07	1.20401e-11	-2.23413e-07	1.76485e-12	8.29712e-12
map-data-2021.01.25-17.48.04.912_0588.jpk-force	588	1.52344e-06	-1.75781e-06	-7.24327e-09	1.22937e-05	1.35175e-11	-4.01001e-05	-5.35172e-11	-2.04017e-06	2.63149e-11	-2.01982e-06	-2.75714e-11	2.09769e-11
map-data-2021.01.25-17.48.04.912_0589.jpk-force	589	1.44531e-06	-1.75781e-06	-7.23178e-09	1.23344e-05	1.66643e-11	-4.45473e-05	-5.01424e-11	-2.17111e-06	8.24899e-12	-2.15042e-06	-2.16347e-11	1.1314e-11
map-data-2021.01.25-17.48.04.912_0590.jpk-force	590	1.36719e-06	-1.75781e-06	-7.25879e-09	1.24496e-05	1.49193e-11	-4.75583e-05	-1.68584e-11	-2.14744e-06	3.41003e-11	-2.18115e-06	1.01739e-11	8.44825e-12
map-data-2021.01.25-17.48.04.912_0591.jpk-force	591	1.28906e-06	-1.75781e-06	-7.27533e-09	1.24893e-05	1.33459e-11	-4.32253e-05	-1.77089e-11	-2.18289e-06	1.99385e-11	-2.19257e-06	4.16462e-12	7.44006e-12
map-data-2021.01.25-17.48.04.912_0592.jpk-force	592	1.21094e-06	-1.75781e-06	-7.22426e-09	1.04253e-05	1.51696e-11	-8.00894e-05	-7.66743e-11	-2.47271e-06	-3.28222e-13	-2.38594e-06	-4.32448e-11	1.80863e-11
map-data-2021.01.25-17.48.04.912_0593.jpk-force	593	1.13281e-06	-1.75781e-06	-7.2436e-09	1.00038e-05	1.42358e-11	-5.00559e-05	-4.99967e-11	-1.43274e-06	2.15687e-11	-1.28329e-06	-1.50233e-11	1.80089e-11
map-data-2021.01.25-17.48.04.912_0594.jpk-force	594	1.05469e-06	-1.75781e-06	-7.23305e-09	1.05697e-05	-4.54029e-11	-0.000107137	-6.58278e-11	-1.66286e-06	1.05276e-11	-1.61249e-06	-2.79464e-11	2.2465e-11
map-data-2021.01.25-17.48.04.912_0595.jpk-force	595	9.76563e-07	-1.75781e-06	-7.22935e-09	1.10423e-05	-3.11989e-11	-8.68527e-05	-1.63893e-11	-1.93371e-06	1.2315e-11	-1.89834e-06	-6.89333e-13	6.10894e-12
map-data-2021.01.25-17.48.04.912_0596.jpk-force	596	8.98437e-07	-1.75781e-06	-7.25186e-09	1.05547e-05	3.52697e-11	-5.09098e-05	-4.54848e-11	9.21186e-08	2.33845e-11	1.64486e-07	-1.89966e-11	1.44989e-11
map-data-2021.01.25-17.48.04.912_0597.jpk-force	597	8.20312e-07	-1.75781e-06	-7.19304e-09	1.07216e-05	1.23762e-11	-5.48034e-05	-1.6448e-11	-6.59287e-07	2.24307e-11	-6.55285e-07	5.32682e-13	8.76021e-12
map-data-2021.01.25-17.48.04.912_0598.jpk-force	598	7.42187e-07	-1.75781e-06	-7.1771e-09	1.05855e-05	1.64066e-11	-4.58861e-05	-1.88633e-11	-6.90619e-07	1.37977e-11	-6.6961e-07	-2.52071e-12	8.12569e-12
map-data-2021.01.25-17.48.04.912_0599.jpk-force	599	6.64062e-07	-1.75781e-06	-7.17319e-09	1.07186e-05	1.54869e-11	-4.63244e-05	-1.78391e-11	-6.90208e-07	1.45226e-11	-6.69199e-07	5.59166e-13	6.89892e-12
map-data-2021.01.25-17.48.04.912_0600.jpk-force	600	5.85938e-07	-1.75781e-06	-7.16675e-09	1.04251e-05	1.51839e-11	-5.15006e-05	-2.0464e-11	-6.74826e-07	1.38519e-11	-6.92834e-07	-2.81006e-12	1.04105e-11
map-data-2021.01.25-17.48.04.912_0601.jpk-force	601	5.07813e-07	-1.75781e-06	-7.16717e-09	1.05863e-05	1.66427e-11	-7.63976e-05	-2.44388e-11	-6.49292e-07	1.35454e-11	-6.54295e-07	-7.00549e-12	7.12925e-12
map-data-2021.01.25-17.48.04.912_0602.jpk-force	602	4.29687e-07	-1.75781e-06	-7.18761e-09	9.01283e-06	5.6651e-11	-8.93994e-05	-7.25578e-12	7.57657e-07	1.97052e-11	7.65327e-07	6.12894e-12	6.97172e-12
map-data-2021.01.25-17.48.04.912_0603.jpk-force	603	3.51563e-07	-1.75781e-06	-7.16855e-09	1.07576e-05	1.24496e-11	-5.56372e-05	-6.25555e-11	-1.73098e-06	9.7959e-12	-1.56817e-06	-2.61948e-11	1.75456e-11
map-data-2021.01.25-17.48.04.912_0604.jpk-force	604	2.73438e-07	-1.75781e-06	-7.20981e-09	1.02799e-05	-4.75222e-12	-8.71476e-05	-1.82415e-11	-1.61519e-06	1.3661e-11	-1.6322e-06	-2.73418e-12	8.33649e-12
map-data-2021.01.25-17.48.04.912_0605.jpk-force	605	1.95312e-07	-1.75781e-06	-7.22495e-09	9.48268e-06	5.62447e-11	-5.26374e-05	-1.5922e-11	6.35938e-07	1.25808e-11	6.17596e-07	-1.73317e-12	7.13676e-12
map-data-2021.01.25-17.48.04.912_0606.jpk-force	606	1.17187e-07	-1.75781e-06	-7.21708e-09	1.05136e-05	1.46597e-11	-2.46401e-05	-6.53028e-12	6.13655e-07	1.84096e-12	6.15655e-07	-1.10743e-12	2.60279e-12
map-data-2021.01.25-17.48.04.912_0607.jpk-force	607	3.90618e-08	-1.75781e-06	-7.19346e-09	1.02195e-05	1.13953e-11	-5.9884e-05	-1.09556e-11	-5.33729e-07	1.60988e-11	-5.00714e-07	1.99347e-12	5.25072e-12
map-data-2021.01.25-17.48.04.912_0608.jpk-force	608	-3.90623e-08	-1.75781e-06	-7.17724e-09	9.80957e-06	2.46051e-11	-4.87698e-05	-7.67831e-12	-1.40397e-06	8.95181e-12	-1.39329e-06	2.1784e-12	4.02739e-12
map-data-2021.01.25-17.48.04.912_0609.jpk-force	609	-1.17187e-07	-1.75781e-06	-7.16845e-09	1.02038e-05	1.23139e-11	-5.44911e-05	-1.54955e-11	-1.39572e-06	-4.85087e-12	-1.40306e-06	-1.01389e-11	2.70334e-12
map-data-2021.01.25-17.48.04.912_0610.jpk-force	610	-1.95313e-07	-1.75781e-06	-7.17792e-09	1.01778e-05	1.91925e-11	-4.39796e-05	-8.29782e-13	-1.39002e-06	2.40923e-11	-1.39702e-06	1.01396e-11	7.2152e-12
map-data-2021.01.25-17.48.04.912_0611.jpk-force	611	-2.73438e-07	-1.75781e-06	-7.18845e-09	1.0066e-05	4.08305e-12	-5.30481e-05	-1.76902e-11	-1.91137e-06	1.44634e-11	-1.89336e-06	-7.95546e-13	7.19478e-12
map-data-2021.01.25-17.48.04.912_0612.jpk-force	612	-3.51563e-07	-1.75781e-06	-7.18055e-09	1.01118e-05	-3.22248e-12	-5.82255e-05	-1.60082e-11	-1.93518e-06	1.11761e-11	-1.93118e-06	-3.24355e-12	7.43749e-12
map-data-2021.01.25-17.48.04.912_0613.jpk-force	613	-4.29688e-07	-1.75781e-06	-7.17782e-09	1.00472e-05	-2.23779e-11	-6.27187e-05	-1.14276e-11	-1.95046e-06	1.70046e-11	-1.96947e-06	2.06088e-13	7.01813e-12
map-data-2021.01.25-17.48.04.912_0614.jpk-force	614	-5.07813e-07	-1.75781e-06	-7.13625e-09	1.0312e-05	-1.74204e-12	-4.96947e-05	-1.36984e-11	-1.94882e-06	1.63126e-11	-1.94482e-06	-1.97245e-12	5.87364e-12
map-data-2021.01.25-17.48.04.912_0615.jpk-force	615	-5.85938e-07	-1.75781e-06	-7.2102e-09	9.74308e-06	3.10529e-11	-5.92509e-05	-1.01691e-11	-1.97397e-06	1.42746e-11	-1.96696e-06	1.51567e-12	6.6291e-12
map-data-2021.01.25-17.48.04.912_0616.jpk-force	616	-6.64063e-07	-1.75781e-06	-7.17815e-09	1.01975e-05	4.59759e-12	-5.40652e-05	-1.75553e-11	-1.94933e-06	2.12443e-11	-1.94533e-06	-4.49625e-13	9.36961e-12
map-data-2021.01.25-17.48.04.912_0617.jpk-force	617	-7.42187e-07	-1.75781e-06	-7.14934e-09	9.88329e-06	-3.11231e-12	-6.62365e-05	-1.37914e-11	-1.95913e-06	8.96803e-12	-1.9548e-06	-1.01456e-12	5.03336e-12
map-data-2021.01.25-17.48.04.912_0618.jpk-force	618	-8.20313e-07	-1.75781e-06	-7.15053e-09	1.01894e-05	2.35069e-11	-4.14856e-05	-1.74826e-11	-5.44859e-07	1.4874e-11	-5.632e-07	-4.01362e-12	7.45095e-12
map-data-2021.01.25-17.48.04.912_0619.jpk-force	619	-8.98437e-07	-1.75781e-06	-7.15302e-09	1.0041e-05	1.22563e-11	-5.52855e-05	-6.84475e-12	-5.48366e-07	1.47934e-11	-5.6504e-07	2.55482e-12	5.1494e-12
map-data-2021.01.25-17.48.04.912_0620.jpk-force	620	-9.76563e-07	-1.75781e-06	-7.17934e-09	9.84687e-06	1.97848e-11	-5.44254e-05	-3.49809e-11	-8.17584e-07	1.79974e-11	-5.7748e-07	-8.66565e-12	1.00125e-11
map-data-2021.01.25-17.48.04.912_0621.jpk-force	621	-1.05469e-06	-1.75781e-06	-7.17478e-09	9.77727e-06	4.04487e-11	-5.69727e-05	-1.11591e-11	-6.7438e-07	8.97337e-12	-6.56036e-07	-3.20428e-13	5.57651e-12
map-data-2021.01.25-17.48.04.912_0622.jpk-force	622	-1.13281e-06	-1.75781e-06	-7.20059e-09	9.84923e-06	3.36881e-11	-5.57508e-05	-2.14695e-11	-8.49037e-07	3.43887e-12	-8.52038e-07	-9.87918e-12	5.38646e-12
map-data-2021.01.25-17.48.04.912_0623.jpk-force	623	-1.21094e-06	-1.75781e-06	-7.1928e-09	1.01054e-05	1.03417e-11	-4.95743e-05	-1.27206e-11	-8.72027e-07	1.14764e-11	-8.8003e-07	1.82964e-12	5.12364e-12
map-data-2021.01.25-17.48.04.912_0624.jpk-force	624	-1.28906e-06	-1.75781e-06	-7.26863e-09	1.01044e-05	7.63726e-11	-5.83112e-05	-1.17568e-11	-1.96306e-06	1.27223e-11	-1.95605e-06	-2.97228e-12	5.41957e-12
map-data-2021.01.25-17.48.04.912_0625.jpk-force	625	-1.36719e-06	-1.75781e-06	-7.25955e-09	1.16365e-05	-1.48951e-11	-7.01075e-05	-1.21376e-11	-1.97241e-06	2.1655e-11	-1.9684e-06	1.59222e-13	7.01224e-12
map-data-2021.01.25-17.48.04.912_0626.jpk-force	626	-1.44531e-06	-1.75781e-06	-7.26795e-09	1.05756e-05	-2.98202e-11	-0.00010198	-1.27274e-11	-1.9598e-06	9.26594e-12	-1.99985e-06	4.56242e-14	4.92405e-12
map-data-2021.01.25-17.48.04.912_0627.jpk-force	627	-1.52344e-06	-1.75781e-06	-7.24484e-09	1.03294e-05	5.92054e-11	-4.77374e-05	-4.15264e-11	-1.93364e-06	1.9603e-11	-1.89193e-06	-1.04321e-11	1.15178e-11
map-data-2021.01.25-17.48.04.912_0628.jpk-force	628	-1.60156e-06	-1.75781e-06	-7.17285e-09	9.97487e-06	-6.25811e-12	-6.04576e-05	-4.15246e-11	-2.3001e-06	2.35131e-11	-2.12555e-06	-5.50296e-12	1.28717e-11
map-data-2021.01.25-17.48.04.912_0629.jpk-force	629	-1.67969e-06	-1.75781e-06	-7.21589e-09	1.0294e-05	1.4898e-11	-5.39915e-05	-8.76129e-12	-4.41026e-07	1.6774e-11	-4.36691e-07	2.26613e-12	5.3012e-12
map-data-2021.01.25-17.48.04.912_0630.jpk-force	630	-1.75781e-06	-1.75781e-06	-7.24526e-09	1.00829e-05	1.70904e-11	-2.36759e-05	-7.46269e-12	-4.54095e-07	1.40246e-11	-4.59431e-07	2.19877e-12	5.97101e-12
map-data-2021.01.25-17.48.04.912_0631.jpk-force	631	-1.83594e-06	-1.75781e-06	-7.30111e-09	1.05894e-05	3.25111e-11	-6.15242e-05	-6.97208e-12	-4.24323e-07	1.59816e-11	-4.19988e-07	3.59399e-12	5.50804e-12
map-data-2021.01.25-17.48.04.912_0632.jpk-force	632	-1.91406e-06	-1.75781e-06	-7.25302e-09	1.11645e-05	1.49698e-11	-4.89632e-05	-1.73432e-11	-4.49085e-07	1.05298e-11	-4.21072e-07	-3.39971e-12	6.29134e-12
map-data-2021.01.25-17.48.04.912_0633.jpk-force	633	-1.99219e-06	-1.75781e-06	-7.22493e-09	1.02786e-05	-3.94147e-11	-7.96686e-05	-3.75994e-11	-2.26239e-06	4.38186e-12	-2.21299e-06	-1.83776e-11	9.19784e-12
map-data-2021.01.25-17.48.04.912_0634.jpk-force	634	-2.07031e-06	-1.75781e-06	-7.28801e-09	1.11833e-05	1.60126e-11	-4.69485e-05	-4.35413e-11	-1.57443e-06	1.34295e-11	-1.51906e-06	-2.13911e-11	1.74474e-11
map-data-2021.01.25-17.48.04.912_0635.jpk-force	635	-2.14844e-06	-1.75781e-06	-7.2988e-09	1.09181e-05	1.05388e-11	-7.39865e-05	-6.3815e-11	-1.62011e-06	5.74079e-12	-1.58007e-06	-3.52111e-11	2.0021e-11
map-data-2021.01.25-17.48.04.912_0636.jpk-force	636	-2.22656e-06	-1.75781e-06	-7.29124e-09	1.09402e-05	3.46279e-11	-4.39647e-05	-4.72521e-11	5.54353e-08	1.50266e-11	9.64546e-08	-1.99752e-11	1.68735e-11
map-data-2021.01.25-17.48.04.912_0637.jpk-force	637	-2.30469e-06	-1.75781e-06	-7.29428e-09	1.07447e-05	2.66699e-11	-4.87036e-05	-1.51488e-11	4.37249e-08	2.50305e-11	1.03085e-07	4.45463e-12	8.03893e-12
map-data-2021.01.25-17.48.04.912_0638.jpk-force	638	-2.38281e-06	-1.75781e-06	-7.28129e-09	1.06779e-05	1.90158e-11	-5.31281e-05	-1.86212e-11	1.05578e-07	1.93591e-11	6.02253e-08	2.66074e-13	7.36645e-12
map-data-2021.01.25-17.48.04.912_0639.jpk-force	639	-2.46094e-06	-1.75781e-06	-7.28656e-09	1.08278e-05	1.65747e-11	-5.53598e-05	-1.63079e-11	-2.96202e-07	1.59598e-11	-3.29218e-07	1.77904e-12	7.61319e-12
map-data-2021.01.25-17.48.04.912_0640.jpk-force	640	-2.46094e-06	-1.67969e-06	-7.2654e-09	1.08846e-05	1.8494e-11	-3.90502e-05	-1.01947e-11	-2.87663e-07	1.94586e-11	-3.34018e-07	3.29514e-12	6.86313e-12
map-data-2021.01.25-17.48.04.912_0641.jpk-force	641	-2.38281e-06	-1.67969e-06	-7.26463e-09	1.08219e-05	1.48017e-11	-4.15352e-05	-1.51512e-11	-3.17019e-07	1.2193e-11	-3.21354e-07	-3.23119e-12	6.15396e-12
map-data-2021.01.25-17.48.04.912_0642.jpk-force	642	-2.30469e-06	-1.67969e-06	-7.31084e-09	1.12512e-05	7.26102e-12	-6.8107e-05	-4.87572e-11	-1.39246e-06	1.79595e-11	-1.21504e-06	-2.22018e-11	1.57344e-11
map-data-2021.01.25-17.48.04.912_0643.jpk-force	643	-2.22656e-06	-1.67969e-06	-7.29044e-09	1.09468e-05	-1.66421e-11	-7.03701e-05	-3.72486e-11	-2.17538e-06	1.97189e-11	-2.02153e-06	-4.34023e-12	9.48486e-12
map-data-2021.01.25-17.48.04.912_0644.jpk-force	644	-2.14844e-06	-1.67969e-06	-7.33625e-09	1.13171e-05	2.86571e-11	-6.26677e-05	-1.49184e-11	-5.09004e-07	1.92348e-11	-4.74988e-07	5.42511e-14	7.37505e-12
map-data-2021.01.25-17.48.04.912_0645.jpk-force	645	-2.07031e-06	-1.67969e-06	-7.31311e-09	1.13518e-05	9.76685e-12	-5.70664e-05	-1.56727e-11	-9.47388e-07	1.67219e-11	-9.51056e-07	1.2232e-12	7.31359e-12
map-data-2021.01.25-17.48.04.912_0646.jpk-force	646	-1.99219e-06	-1.67969e-06	-7.27845e-09	1.0943e-05	2.7223e-11	-3.18642e-05	-1.43067e-11	-9.58e-07	1.23634e-11	-9.39658e-07	2.28709e-13	6.84437e-12
map-data-2021.01.25-17.48.04.912_0647.jpk-force	647	-1.91406e-06	-1.67969e-06	-7.26337e-09	1.09236e-05	1.65417e-11	-4.16207e-05	-1.16422e-11	-9.3577e-07	2.07029e-11	-9.43106e-07	2.57624e-12	7.95559e-12
map-data-2021.01.25-17.48.04.912_0648.jpk-force	648	-1.83594e-06	-1.67969e-06	-7.28699e-09	1.08098e-05	1.64587e-11	-4.30763e-05	-1.02178e-11	-9.55026e-07	1.33776e-11	-9.20344e-07	3.3917e-13	5.75484e-12
map-data-2021.01.25-17.48.04.912_0649.jpk-force	649	-1.75781e-06	-1.67969e-06	-7.31182e-09	1.1021e-05	1.55485e-11	-5.23403e-05	-3.2774e-11	-1.86759e-06	1.77939e-11	-1.81687e-06	-8.66069e-12	1.01745e-11
map-data-2021.01.25-17.48.04.912_0650.jpk-force	650	-1.67969e-06	-1.67969e-06	-7.30528e-09	1.12291e-05	1.54704e-11	-4.70559e-05	-1.53784e-11	-1.95475e-06	2.82383e-11	-1.85599e-06	2.16576e-12	8.67465e-12
map-data-2021.01.25-17.48.04.912_0651.jpk-force	651	-1.60156e-06	-1.67969e-06	-7.35262e-09	1.11728e-05	2.87893e-11	-7.34449e-05	-6.93731e-12	-1.42704e-06	1.0627e-11	-1.42337e-06	1.18349e-12	5.21414e-12
map-data-2021.01.25-17.48.04.912_0652.jpk-force	652	-1.52344e-06	-1.67969e-06	-7.35071e-09	1.15849e-05	2.47944e-11	-5.48151e-05	-8.61054e-12	-1.43313e-06	2.06306e-11	-1.42179e-06	1.08899e-11	7.36928e-12
map-data-2021.01.25-17.48.04.912_0653.jpk-force	653	-1.44531e-06	-1.67969e-06	-7.29857e-09	1.12385e-05	1.62611e-11	-4.46794e-05	-1.81157e-11	-8.18552e-07	1.30177e-11	-8.14217e-07	-1.4767e-12	8.3989e-12
map-data-2021.01.25-17.48.04.912_0654.jpk-force	654	-1.36719e-06	-1.67969e-06	-7.31756e-09	1.13023e-05	2.05765e-11	-5.22809e-05	-9.19781e-12	-8.18099e-07	2.08678e-11	-8.13097e-07	2.98768e-12	8.10606e-12
map-data-2021.01.25-17.48.04.912_0655.jpk-force	655	-1.28906e-06	-1.67969e-06	-7.30946e-09	1.12158e-05	3.23374e-11	-3.23343e-05	-9.3503e-12	-8.12935e-07	4.40657e-12	-8.086e-07	-8.64264e-13	3.73625e-12
map-data-2021.01.25-17.48.04.912_0656.jpk-force	656	-1.21094e-06	-1.67969e-06	-7.27855e-09	1.15765e-05	2.47037e-11	-2.53316e-05	-1.9343e-11	-8.07059e-07	1.51302e-11	-8.14395e-07	-7.54727e-13	8.88129e-12
map-data-2021.01.25-17.48.04.912_0657.jpk-force	657	-1.13281e-06	-1.67969e-06	-7.30678e-09	1.1191e-05	3.16133e-11	-4.26306e-05	-7.45449e-11	-1.87116e-06	-1.36191e-11	-1.86315e-06	-4.54127e-11	1.38025e-11
map-data-2021.01.25-17.48.04.912_0658.jpk-force	658	-1.05469e-06	-1.67969e-06	-7.30415e-09	1.16402e-05	4.43348e-12	-4.94309e-05	-1.17212e-11	-1.52368e-06	1.79479e-11	-1.58072e-06	2.12082e-12	7.56681e-12
map-data-2021.01.25-17.48.04.912_0659.jpk-force	659	-9.76563e-07	-1.67969e-06	-7.2741e-09	1.12965e-05	1.44514e-11	-5.24951e-05	-4.30149e-11	-2.09306e-06	2.2699e-11	-2.02032e-06	-1.13033e-11	1.31563e-11
map-data-2021.01.25-17.48.04.912_0660.jpk-force	660	-8.98437e-07	-1.67969e-06	-7.36217e-09	1.13061e-05	4.3488e-11	-6.56414e-05	-3.09154e-11	-1.12925e-06	2.82846e-11	-1.0729e-06	-5.34162e-12	1.26671e-11
map-data-2021.01.25-17.48.04.912_0661.jpk-force	661	-8.20313e-07	-1.67969e-06	-7.36656e-09	1.15048e-05	2.3915e-11	-4.48807e-05	-6.84624e-12	-1.15067e-06	2.09657e-11	-1.14701e-06	4.51347e-12	8.85673e-12
map-data-2021.01.25-17.48.04.912_0662.jpk-force	662	-7.42187e-07	-1.67969e-06	-7.3245e-09	1.06488e-05	1.1545e-11	-5.19393e-05	-5.25337e-11	-1.41967e-06	1.73711e-11	-1.20186e-06	-2.70949e-11	1.37279e-11
map-data-2021.01.25-17.48.04.912_0663.jpk-force	663	-6.64063e-07	-1.67969e-06	-7.33174e-09	1.06794e-05	8.29755e-12	-8.89161e-05	-3.81222e-11	-1.85857e-06	2.09902e-11	-1.81685e-06	-8.99704e-12	9.88587e-12
map-data-2021.01.25-17.48.04.912_0664.jpk-force	664	-5.85938e-07	-1.67969e-06	-7.35247e-09	1.12698e-05	1.17496e-11	-5.06902e-05	-5.56032e-11	-2.26011e-06	1.36749e-11	-2.20171e-06	-1.753e-11	1.67058e-11
map-data-2021.01.25-17.48.04.912_0665.jpk-force	665	-5.07813e-07	-1.67969e-06	-7.35573e-09	1.09758e-05	5.70831e-12	-5.68082e-05	-1.59481e-11	-2.25171e-06	2.28185e-11	-2.20199e-06	1.07133e-12	8.18037e-12
map-data-2021.01.25-17.48.04.912_0666.jpk-force	666	-4.29688e-07	-1.67969e-06	-7.29135e-09	1.04968e-05	1.52189e-11	-4.49936e-05	-1.35809e-11	-1.06698e-06	1.01372e-11	-1.05697e-06	-1.62357e-12	5.65917e-12
map-data-2021.01.25-17.48.04.912_0667.jpk-force	667	-3.51563e-07	-1.67969e-06	-7.29131e-09	1.09404e-05	3.49041e-11	-4.3393e-05	-1.68613e-11	-1.0401e-06	1.87156e-11	-1.04377e-06	-3.93033e-13	7.93138e-12
map-data-2021.01.25-17.48.04.912_0668.jpk-force	668	-2.73438e-07	-1.67969e-06	-7.28064e-09	1.07753e-05	1.72629e-11	-5.95804e-05	-7.05265e-12	-1.04939e-06	1.75511e-11	-1.0804e-06	3.02207e-12	6.52755e-12
map-data-2021.01.25-17.48.04.912_0669.jpk-force	669	-1.95313e-07	-1.67969e-06	-7.33913e-09	1.05427e-05	3.12935e-11	-2.64392e-05	-1.72719e-11	6.50225e-07	1.40639e-11	6.43556e-07	-2.45178e-12	7.467e-12
map-data-2021.01.25-17.48.04.912_0670.jpk-force	670	-1.17188e-07	-1.67969e-06	-7.37453e-09	1.11815e-05	1.36646e-11	-5.63703e-05	-1.24533e-11	-3.58096e-07	1.73496e-11	-3.17077e-07	-5.54131e-13	6.10015e-12
map-data-2021.01.25-17.48.04.912_0671.jpk-force	671	-3.90635e-08	-1.67969e-06	-7.32032e-09	1.13016e-05	-4.2564e-11	-8.62152e-05	-4.57159e-11	-2.04051e-06	1.42548e-11	-2.01949e-06	-1.42022e-11	1.06394e-11
map-data-2021.01.25-17.48.04.912_0672.jpk-force	672	3.90618e-08	-1.67969e-06	-7.30788e-09	1.11104e-05	-4.58051e-11	-9.03602e-05	-1.15159e-11	-1.72884e-06	1.55839e-11	-1.70349e-06	-3.86008e-13	6.09497e-12
map-data-2021.01.25-17.48.04.912_0673.jpk-force	673	1.17188e-07	-1.67969e-06	-7.3699e-09	1.1653e-05	3.75103e-11	-6.45797e-05	-1.12351e-11	-1.34252e-06	2.61441e-11	-1.29283e-06	1.06104e-11	7.04072e-12
map-data-2021.01.25-17.48.04.912_0674.jpk-force	674	1.95312e-07	-1.67969e-06	-7.28223e-09	1.15508e-05	-1.87422e-11	-5.84125e-05	-5.44399e-11	-1.98774e-06	1.25031e-11	-1.917e-06	-2.48665e-11	1.92083e-11
map-data-2021.01.25-17.48.04.912_0675.jpk-force	675	2.73438e-07	-1.67969e-06	-7.30093e-09	1.14561e-05	-1.04171e-10	-0.00011502	-4.03744e-11	-2.53636e-06	1.79833e-11	-2.50198e-06	-3.762e-12	1.20669e-11
map-data-2021.01.25-17.48.04.912_0676.jpk-force	676	3.51562e-07	-1.67969e-06	-7.36221e-09	1.15276e-05	-9.72564e-12	-6.16819e-05	-1.57774e-11	-1.43997e-06	1.43751e-11	-1.42029e-06	-1.83984e-12	7.50887e-12
map-data-2021.01.25-17.48.04.912_0677.jpk-force	677	4.29686e-07	-1.67969e-06	-7.32552e-09	1.16706e-05	1.43168e-11	-5.27247e-05	-1.62186e-11	-1.41934e-06	1.79396e-11	-1.43969e-06	-5.06265e-13	7.56951e-12
map-data-2021.01.25-17.48.04.912_0678.jpk-force	678	5.07812e-07	-1.67969e-06	-7.30643e-09	1.17727e-05	1.68014e-11	-3.75456e-05	-1.39601e-11	-8.94753e-07	1.74987e-11	-9.15095e-07	3.14298e-13	7.39174e-12
map-data-2021.01.25-17.48.04.912_0679.jpk-force	679	5.85936e-07	-1.67969e-06	-7.29185e-09	1.12379e-05	-1.66589e-11	-7.80859e-05	-4.43106e-11	-2.10921e-06	2.7163e-11	-2.0358e-06	-1.16018e-11	1.63441e-11
map-data-2021.01.25-17.48.04.912_0680.jpk-force	680	6.64062e-07	-1.67969e-06	-7.25652e-09	1.13237e-05	-6.79479e-12	-5.98291e-05	-7.84156e-12	-2.02683e-06	3.3168e-11	-2.12729e-06	1.22319e-11	7.80153e-12
map-data-2021.01.25-17.48.04.912_0681.jpk-force	681	7.42187e-07	-1.67969e-06	-7.25183e-09	1.06212e-05	1.87527e-11	-6.58636e-05	-9.3735e-12	-2.02625e-06	3.80427e-11	-2.14907e-06	1.48242e-11	8.40514e-12
map-data-2021.01.25-17.48.04.912_0682.jpk-force	682	8.20312e-07	-1.67969e-06	-7.27738e-09	1.01068e-05	2.93385e-11	-2.63118e-05	-4.9088e-11	3.80675e-07	2.75415e-11	4.13023e-07	-1.26056e-11	2.05378e-11
map-data-2021.01.25-17.48.04.912_0683.jpk-force	683	8.98437e-07	-1.67969e-06	-7.28587e-09	9.9701e-06	5.9491e-11	-3.95768e-05	-6.63642e-11	9.65116e-07	1.84105e-11	1.04015e-06	-3.62219e-11	2.1542e-11
map-data-2021.01.25-17.48.04.912_0684.jpk-force	684	9.76562e-07	-1.67969e-06	-7.26514e-09	1.05235e-05	-8.70483e-12	-7.2291e-05	-5.74422e-11	-1.49272e-06	1.69159e-11	-1.48705e-06	-2.41603e-11	2.08981e-11
map-data-2021.01.25-17.48.04.912_0685.jpk-force	685	1.05469e-06	-1.67969e-06	-7.26097e-09	1.06375e-05	4.75138e-12	-5.60743e-05	-1.48182e-11	-1.53231e-06	1.95762e-11	-1.44859e-06	2.01313e-12	7.64304e-12
map-data-2021.01.25-17.48.04.912_0686.jpk-force	686	1.13281e-06	-1.67969e-06	-7.31509e-09	1.0794e-05	3.74648e-11	-3.77194e-05	-1.5521e-11	-1.52186e-06	2.37716e-11	-1.48683e-06	5.23733e-12	8.36753e-12
map-data-2021.01.25-17.48.04.912_0687.jpk-force	687	1.21094e-06	-1.67969e-06	-7.274e-09	1.07617e-05	2.78732e-11	-3.21224e-05	-1.01984e-11	-1.44245e-06	2.88074e-11	-1.55219e-06	4.7589e-12	9.24183e-12
map-data-2021.01.25-17.48.04.912_0688.jpk-force	688	1.28906e-06	-1.67969e-06	-7.2713e-09	1.07797e-05	-6.13107e-15	-5.92227e-05	-1.42019e-11	-1.53391e-06	1.8909e-11	-1.55159e-06	4.34889e-14	7.09943e-12
map-data-2021.01.25-17.48.04.912_0689.jpk-force	689	1.36719e-06	-1.67969e-06	-7.26861e-09	1.00643e-05	-3.82623e-12	-9.14931e-05	-7.23024e-12	-7.3984e-07	1.65103e-11	-7.43175e-07	3.66674e-12	6.3619e-12
map-data-2021.01.25-17.48.04.912_0690.jpk-force	690	1.44531e-06	-1.67969e-06	-7.2517e-09	1.05697e-05	4.55681e-12	-5.34788e-05	-1.68559e-11	-1.27397e-06	1.79401e-11	-1.29265e-06	7.22804e-14	7.89197e-12
map-data-2021.01.25-17.48.04.912_0691.jpk-force	691	1.52344e-06	-1.67969e-06	-7.22242e-09	1.03631e-05	2.2292e-11	-4.34674e-05	-1.23249e-11	-1.2644e-06	1.72081e-11	-1.28208e-06	2.15494e-12	7.17475e-12
map-data-2021.01.25-17.48.04.912_0692.jpk-force	692	1.60156e-06	-1.67969e-06	-7.29604e-09	1.02804e-05	2.10089e-11	-5.60737e-05	-6.13273e-12	-1.26239e-06	3.45699e-12	-1.25705e-06	-2.65295e-12	2.30174e-12
map-data-2021.01.25-17.48.04.912_0693.jpk-force	693	1.67969e-06	-1.67969e-06	-7.24894e-09	1.02351e-05	1.66529e-11	-4.95367e-05	-5.10602e-11	-1.36488e-06	3.44194e-12	-1.30451e-06	-2.2512e-11	1.43992e-11
map-data-2021.01.25-17.48.04.912_0694.jpk-force	694	1.75781e-06	-1.67969e-06	-7.20858e-09	1.05822e-05	2.80291e-11	-2.32184e-05	-1.14395e-11	-1.38723e-06	1.14892e-11	-1.41057e-06	-3.18883e-13	5.56074e-12
map-data-2021.01.25-17.48.04.912_0695.jpk-force	695	1.83594e-06	-1.67969e-06	-7.22404e-09	9.97389e-06	4.60549e-11	-4.19078e-05	-5.81783e-11	2.20861e-07	2.14143e-11	3.69597e-07	-3.17664e-11	1.3022e-11
map-data-2021.01.25-17.48.04.912_0696.jpk-force	696	1.91406e-06	-1.67969e-06	-7.25176e-09	1.02307e-05	1.63814e-11	-5.77543e-05	-1.55682e-11	-8.79332e-08	1.17195e-11	-9.42695e-08	-7.06231e-13	7.13112e-12
map-data-2021.01.25-17.48.04.912_0697.jpk-force	697	1.99219e-06	-1.67969e-06	-7.25147e-09	1.07097e-05	1.03331e-11	-4.8937e-05	-1.46526e-11	-9.12376e-08	1.55688e-11	-8.42349e-08	-6.02324e-13	8.94716e-12
map-data-2021.01.25-17.48.04.912_0698.jpk-force	698	2.07031e-06	-1.67969e-06	-7.23784e-09	9.71771e-06	2.54849e-11	-5.84417e-05	-6.26703e-11	-1.6684e-06	2.05525e-11	-1.59565e-06	-2.39699e-11	2.06208e-11
map-data-2021.01.25-17.48.04.912_0699.jpk-force	699	2.14844e-06	-1.67969e-06	-7.21773e-09	9.99847e-06	-3.94506e-12	-5.71273e-05	-8.77521e-12	-1.6742e-06	1.69967e-11	-1.66953e-06	4.66133e-12	7.06891e-12
map-data-2021.01.25-17.48.04.912_0700.jpk-force	700	2.22656e-06	-1.67969e-06	-7.21968e-09	1.01067e-05	-7.92968e-12	-6.68421e-05	-3.63163e-11	-2.54815e-06	1.75002e-11	-2.53046e-06	-9.92738e-12	1.25261e-11
map-data-2021.01.25-17.48.04.912_0701.jpk-force	701	2.30469e-06	-1.67969e-06	-7.23139e-09	9.98198e-06	7.29427e-12	-5.97485e-05	-1.27373e-11	-2.44728e-06	3.4161e-11	-2.54339e-06	1.14669e-11	8.59254e-12
map-data-2021.01.25-17.48.04.912_0702.jpk-force	702	2.38281e-06	-1.67969e-06	-7.22897e-09	1.02167e-05	3.82328e-11	-3.56053e-05	-1.13132e-11	-2.45773e-06	3.05793e-11	-2.47743e-06	1.07155e-11	8.00542e-12
map-data-2021.01.25-17.48.04.912_0703.jpk-force	703	2.46094e-06	-1.67969e-06	-7.23731e-09	1.01439e-05	1.46639e-11	-5.67991e-05	-6.64031e-12	-2.44295e-06	3.94481e-11	-2.60348e-06	1.72382e-11	9.69486e-12
map-data-2021.01.25-17.48.04.912_0704.jpk-force	704	2.46094e-06	-1.60156e-06	-7.26144e-09	1.02759e-05	1.7329e-11	-6.52766e-05	-1.5663e-11	-1.82232e-07	1.52099e-11	-2.25253e-07	6.51169e-16	7.59575e-12
map-data-2021.01.25-17.48.04.912_0705.jpk-force	705	2.38281e-06	-1.60156e-06	-7.25432e-09	1.05577e-05	1.54874e-11	-4.27873e-05	-1.27722e-11	-2.03584e-07	2.02509e-11	-2.12588e-07	4.15464e-12	1.02561e-11
map-data-2021.01.25-17.48.04.912_0706.jpk-force	706	2.30469e-06	-1.60156e-06	-7.28401e-09	1.04383e-05	8.9861e-12	-8.88264e-05	-1.34587e-11	-2.05452e-07	1.66624e-11	-1.98449e-07	2.35259e-12	8.02109e-12
map-data-2021.01.25-17.48.04.912_0707.jpk-force	707	2.22656e-06	-1.60156e-06	-7.24856e-09	1.01029e-05	2.26415e-11	-3.19924e-05	-7.41318e-12	-1.96054e-07	1.19725e-11	-2.12728e-07	2.62712e-12	5.97365e-12
map-data-2021.01.25-17.48.04.912_0708.jpk-force	708	2.14844e-06	-1.60156e-06	-7.24022e-09	1.00039e-05	1.64073e-11	-4.56359e-05	-1.35226e-11	-2.60926e-07	1.21756e-11	-2.4125e-07	1.7864e-13	6.77123e-12
map-data-2021.01.25-17.48.04.912_0709.jpk-force	709	2.07031e-06	-1.60156e-06	-7.25054e-09	1.06403e-05	1.1514e-11	-7.93743e-05	-1.80879e-11	-2.39829e-07	8.49934e-12	-2.35494e-07	-4.309e-12	8.46555e-12
map-data-2021.01.25-17.48.04.912_0710.jpk-force	710	1.99219e-06	-1.60156e-06	-7.23561e-09	1.03068e-05	1.82076e-11	-3.72388e-05	-1.07539e-11	-2.50404e-07	1.08958e-11	-2.38731e-07	-1.06176e-12	4.98605e-12
map-data-2021.01.25-17.48.04.912_0711.jpk-force	711	1.91406e-06	-1.60156e-06	-7.23364e-09	1.01351e-05	1.60412e-11	-4.72863e-05	-1.2654e-11	-2.83119e-07	1.67838e-11	-2.65444e-07	-1.08031e-12	6.52876e-12
map-data-2021.01.25-17.48.04.912_0712.jpk-force	712	1.83594e-06	-1.60156e-06	-7.27592e-09	1.00499e-05	9.95662e-12	-6.48313e-05	-4.46089e-11	-1.25074e-06	1.06248e-11	-1.16602e-06	-1.72196e-11	1.19508e-11
map-data-2021.01.25-17.48.04.912_0713.jpk-force	713	1.75781e-06	-1.60156e-06	-7.24531e-09	9.21422e-06	1.57775e-11	-4.35314e-05	-7.86656e-12	-1.18286e-06	3.71745e-11	-1.20121e-06	1.25851e-11	8.64667e-12
map-data-2021.01.25-17.48.04.912_0714.jpk-force	714	1.67969e-06	-1.60156e-06	-7.2591e-09	1.01425e-05	6.17457e-12	-4.65052e-05	-1.9236e-11	-1.17142e-06	1.59605e-11	-1.17709e-06	-1.15057e-12	8.12977e-12
map-data-2021.01.25-17.48.04.912_0715.jpk-force	715	1.60156e-06	-1.60156e-06	-7.23996e-09	1.01952e-05	1.65664e-11	-4.45023e-05	-1.68862e-11	-1.16918e-06	1.64567e-11	-1.20186e-06	-9.87159e-13	7.01418e-12
map-data-2021.01.25-17.48.04.912_0716.jpk-force	716	1.52344e-06	-1.60156e-06	-7.23918e-09	1.05247e-05	9.54188e-12	-5.53582e-05	-2.60964e-12	-1.21175e-06	1.76004e-11	-1.1914e-06	3.79921e-12	5.46786e-12
map-data-2021.01.25-17.48.04.912_0717.jpk-force	717	1.44531e-06	-1.60156e-06	-7.31863e-09	1.01117e-05	9.1266e-12	-7.70385e-05	-1.51656e-11	-1.09058e-06	9.15867e-12	-1.07658e-06	-1.92937e-12	6.34923e-12
map-data-2021.01.25-17.48.04.912_0718.jpk-force	718	1.36719e-06	-1.60156e-06	-7.2621e-09	1.04e-05	1.49084e-11	-4.11713e-05	-8.4708e-12	-1.09061e-06	6.11396e-12	-1.09327e-06	-5.45977e-13	3.87589e-12
map-data-2021.01.25-17.48.04.912_0719.jpk-force	719	1.28906e-06	-1.60156e-06	-7.23279e-09	1.01806e-05	-1.15419e-11	-6.32473e-05	-3.66025e-11	-2.30122e-06	2.20293e-11	-2.24148e-06	-1.20943e-11	1.3095e-11
map-data-2021.01.25-17.48.04.912_0720.jpk-force	720	1.21094e-06	-1.60156e-06	-7.26792e-09	1.04078e-05	-4.0072e-11	-7.34593e-05	-1.4305e-11	-1.84162e-06	1.74899e-11	-1.86264e-06	9.0925e-13	7.77971e-12
map-data-2021.01.25-17.48.04.912_0721.jpk-force	721	1.13281e-06	-1.60156e-06	-7.33275e-09	1.05212e-05	7.70363e-12	-6.48775e-05	-4.86438e-11	-1.21256e-06	4.77578e-13	-1.16254e-06	-2.75293e-11	9.7383e-12
map-data-2021.01.25-17.48.04.912_0722.jpk-force	722	1.05469e-06	-1.60156e-06	-7.33945e-09	1.06432e-05	4.52316e-11	-6.25681e-05	-1.00999e-11	-1.35512e-06	1.09483e-11	-1.3728e-06	-1.13761e-12	5.26215e-12
map-data-2021.01.25-17.48.04.912_0723.jpk-force	723	9.76563e-07	-1.60156e-06	-7.27977e-09	1.02775e-05	1.98735e-11	-4.83872e-05	-1.54583e-11	-1.36419e-06	7.32537e-12	-1.35452e-06	-1.76451e-12	5.27984e-12
map-data-2021.01.25-17.48.04.912_0724.jpk-force	724	8.98437e-07	-1.60156e-06	-7.29237e-09	1.04957e-05	2.7091e-11	-4.43002e-05	-1.43529e-11	-1.27447e-06	1.8254e-11	-1.29181e-06	2.51009e-12	9.92587e-12
map-data-2021.01.25-17.48.04.912_0725.jpk-force	725	8.20312e-07	-1.60156e-06	-7.40512e-09	1.24139e-05	2.35651e-11	-6.21626e-05	-1.43454e-11	-1.99895e-06	2.22046e-11	-2.00729e-06	-8.51541e-13	7.51448e-12
map-data-2021.01.25-17.48.04.912_0726.jpk-force	726	7.42187e-07	-1.60156e-06	-7.29939e-09	1.06745e-05	7.90083e-12	-5.2858e-05	-5.22058e-12	-1.9621e-06	9.50525e-12	-1.96744e-06	2.59416e-12	4.51535e-12
map-data-2021.01.25-17.48.04.912_0727.jpk-force	727	6.64062e-07	-1.60156e-06	-7.31822e-09	1.0768e-05	1.97988e-11	-5.43818e-05	-6.25037e-12	-1.96333e-06	5.90431e-12	-1.966e-06	1.01879e-12	3.32979e-12
map-data-2021.01.25-17.48.04.912_0728.jpk-force	728	5.85938e-07	-1.60156e-06	-7.45335e-09	1.25432e-05	-3.56954e-11	-6.99522e-05	-1.60162e-11	-1.96323e-06	1.09048e-11	-1.96757e-06	-4.66694e-12	9.37745e-12
map-data-2021.01.25-17.48.04.912_0729.jpk-force	729	5.07813e-07	-1.60156e-06	-7.38844e-09	1.12429e-05	7.43406e-11	-4.10124e-05	-7.27391e-12	-1.96289e-06	1.48287e-11	-1.96656e-06	4.08932e-12	8.1292e-12
map-data-2021.01.25-17.48.04.912_0730.jpk-force	730	4.29687e-07	-1.60156e-06	-7.40609e-09	1.18916e-05	3.45472e-11	-2.7241e-05	-4.04303e-11	2.11179e-08	2.1255e-11	7.91442e-08	-1.3215e-11	1.22501e-11
map-data-2021.01.25-17.48.04.912_0731.jpk-force	731	3.51563e-07	-1.60156e-06	-7.33415e-09	1.1979e-05	1.57605e-11	-5.45459e-05	-1.10881e-11	6.60979e-08	1.34216e-11	7.10999e-08	4.96496e-14	4.86847e-12
map-data-2021.01.25-17.48.04.912_0732.jpk-force	732	2.73438e-07	-1.60156e-06	-7.29958e-09	1.15093e-05	3.77187e-11	-3.85092e-05	-1.11602e-11	-5.99927e-07	1.39452e-11	-6.19603e-07	1.53751e-12	6.96828e-12
map-data-2021.01.25-17.48.04.912_0733.jpk-force	733	1.95312e-07	-1.60156e-06	-7.34612e-09	1.12912e-05	1.73638e-11	-5.95062e-05	-5.71917e-11	-2.36402e-06	2.0295e-11	-2.28192e-06	-1.64973e-11	1.53669e-11
map-data-2021.01.25-17.48.04.912_0734.jpk-force	734	1.17187e-07	-1.60156e-06	-7.3401e-09	1.10869e-05	6.75425e-13	-5.84517e-05	-5.15453e-11	-2.14662e-06	2.15431e-11	-2.11158e-06	-1.57977e-11	1.77865e-11
map-data-2021.01.25-17.48.04.912_0735.jpk-force	735	3.90618e-08	-1.60156e-06	-7.33073e-09	1.0619e-05	2.71722e-11	-3.44297e-05	-4.27863e-11	2.30291e-07	2.13564e-11	3.02659e-07	-1.77482e-11	1.35414e-11
map-data-2021.01.25-17.48.04.912_0736.jpk-force	736	-3.90623e-08	-1.60156e-06	-7.32928e-09	1.0678e-05	1.96761e-11	-4.90039e-05	-1.15282e-11	-5.00653e-08	9.17836e-12	-2.9389e-08	-3.58943e-13	5.26281e-12
map-data-2021.01.25-17.48.04.912_0737.jpk-force	737	-1.17187e-07	-1.60156e-06	-7.28935e-09	1.05639e-05	1.42898e-11	-2.89552e-05	-1.27951e-11	-4.43052e-08	1.88579e-11	-5.33094e-08	2.91886e-12	7.3783e-12
map-data-2021.01.25-17.48.04.912_0738.jpk-force	738	-1.95313e-07	-1.60156e-06	-7.29352e-09	1.05185e-05	1.69248e-11	-5.2222e-05	-1.20528e-11	-4.97294e-08	2.19365e-11	-3.17214e-08	2.78494e-12	7.74543e-12
map-data-2021.01.25-17.48.04.912_0739.jpk-force	739	-2.73438e-07	-1.60156e-06	-7.33114e-09	1.07539e-05	1.5389e-11	-5.2185e-05	-3.41208e-11	-2.18328e-06	1.71693e-11	-2.12354e-06	-7.96969e-12	1.01022e-11
map-data-2021.01.25-17.48.04.912_0740.jpk-force	740	-3.51563e-07	-1.60156e-06	-7.3058e-09	1.05527e-05	-4.86025e-12	-6.59524e-05	-2.52959e-12	-8.16061e-07	1.64476e-11	-8.1306e-07	6.20392e-12	5.05289e-12
map-data-2021.01.25-17.48.04.912_0741.jpk-force	741	-4.29688e-07	-1.60156e-06	-7.33072e-09	1.04832e-05	1.68888e-11	-5.37059e-05	-6.47211e-11	-1.71485e-06	2.49535e-11	-1.63144e-06	-1.62503e-11	2.0308e-11
map-data-2021.01.25-17.48.04.912_0742.jpk-force	742	-5.07813e-07	-1.60156e-06	-7.34812e-09	1.06733e-05	2.44258e-11	-5.33457e-05	-6.19333e-12	-1.68683e-06	8.57602e-12	-1.68383e-06	-4.38937e-13	2.9926e-12
map-data-2021.01.25-17.48.04.912_0743.jpk-force	743	-5.85938e-07	-1.60156e-06	-7.35624e-09	1.05456e-05	7.55744e-13	-5.57564e-05	-8.49465e-12	-1.67528e-06	1.94898e-11	-1.67127e-06	2.74342e-12	6.26497e-12
map-data-2021.01.25-17.48.04.912_0744.jpk-force	744	-6.64063e-07	-1.60156e-06	-7.37122e-09	1.09751e-05	7.62842e-11	-1.53822e-05	-8.41886e-12	-1.59364e-06	1.18306e-11	-1.59064e-06	8.97091e-13	5.9287e-12
map-data-2021.01.25-17.48.04.912_0745.jpk-force	745	-7.42187e-07	-1.60156e-06	-7.35249e-09	1.05673e-05	2.61807e-11	-4.89889e-05	-3.0133e-11	-2.32361e-06	1.49886e-11	-2.29257e-06	-1.12354e-11	1.13819e-11
map-data-2021.01.25-17.48.04.912_0746.jpk-force	746	-8.20313e-07	-1.60156e-06	-7.35775e-09	1.10681e-05	3.7398e-12	-5.30424e-05	-1.18692e-11	-2.11692e-06	1.67209e-11	-2.11158e-06	2.55635e-12	9.02476e-12
map-data-2021.01.25-17.48.04.912_0747.jpk-force	747	-8.98437e-07	-1.60156e-06	-7.31993e-09	1.09105e-05	-1.27894e-10	-0.000106628	-1.71048e-11	-2.11512e-06	1.37561e-11	-2.11079e-06	-4.28843e-12	7.88349e-12
map-data-2021.01.25-17.48.04.912_0748.jpk-force	748	-9.76563e-07	-1.60156e-06	-7.36654e-09	1.08686e-05	2.4967e-11	-2.85785e-05	-3.09507e-11	-5.34554e-07	1.70785e-11	-5.01205e-07	-7.50803e-12	1.10307e-11
map-data-2021.01.25-17.48.04.912_0749.jpk-force	749	-1.05469e-06	-1.60156e-06	-7.29877e-09	1.02357e-05	1.44845e-11	-4.33338e-05	-1.54585e-11	-5.23444e-07	1.33304e-11	-5.39453e-07	6.45436e-13	8.47284e-12
map-data-2021.01.25-17.48.04.912_0750.jpk-force	750	-1.13281e-06	-1.60156e-06	-7.31969e-09	1.09655e-05	1.19631e-11	-5.41336e-05	-3.35362e-11	-2.13188e-06	2.18103e-11	-2.11253e-06	-7.59287e-12	9.39613e-12
map-data-2021.01.25-17.48.04.912_0751.jpk-force	751	-1.21094e-06	-1.60156e-06	-7.36677e-09	1.10119e-05	2.57373e-11	-6.45297e-05	-5.31463e-11	-1.09138e-06	1.50265e-11	-9.85664e-07	-1.17696e-11	1.68927e-11
map-data-2021.01.25-17.48.04.912_0752.jpk-force	752	-1.28906e-06	-1.60156e-06	-7.40906e-09	1.07872e-05	1.44781e-11	-4.06405e-05	-1.40956e-11	-1.0387e-06	2.06532e-11	-1.03169e-06	3.47302e-12	7.17011e-12
map-data-2021.01.25-17.48.04.912_0753.jpk-force	753	-1.36719e-06	-1.60156e-06	-7.40249e-09	1.10087e-05	5.87563e-11	-2.42835e-05	-1.38964e-11	-1.03667e-06	2.13977e-11	-1.019e-06	2.21543e-12	7.68785e-12
map-data-2021.01.25-17.48.04.912_0754.jpk-force	754	-1.44531e-06	-1.60156e-06	-7.37005e-09	1.08015e-05	1.59613e-11	-5.39243e-05	-5.55873e-11	-8.17022e-07	7.25655e-12	-7.68668e-07	-3.02888e-11	1.33815e-11
map-data-2021.01.25-17.48.04.912_0755.jpk-force	755	-1.52344e-06	-1.60156e-06	-7.35771e-09	1.0668e-05	1.49176e-11	-6.00559e-05	-4.15898e-11	-1.02804e-06	2.48212e-11	-9.68684e-07	-1.82855e-11	1.491e-11
map-data-2021.01.25-17.48.04.912_0756.jpk-force	756	-1.60156e-06	-1.60156e-06	-7.38619e-09	1.09633e-05	1.62743e-11	-5.16287e-05	-4.30349e-11	-1.11613e-06	1.08568e-11	-1.05677e-06	-8.65906e-12	1.05232e-11
map-data-2021.01.25-17.48.04.912_0757.jpk-force	757	-1.67969e-06	-1.60156e-06	-7.42338e-09	1.09132e-05	1.0027e-11	-6.36319e-05	-1.18561e-11	-1.18342e-06	1.98893e-11	-1.20077e-06	2.11177e-12	7.16416e-12
map-data-2021.01.25-17.48.04.912_0758.jpk-force	758	-1.75781e-06	-1.60156e-06	-7.40617e-09	1.14403e-05	6.30174e-12	-7.19046e-05	-1.56262e-11	-1.45439e-06	3.02957e-11	-1.27831e-06	5.96964e-12	8.73243e-12
map-data-2021.01.25-17.48.04.912_0759.jpk-force	759	-1.83594e-06	-1.60156e-06	-7.37817e-09	1.07116e-05	2.48096e-11	-4.29544e-05	-4.53608e-11	-1.15472e-06	1.76121e-11	-1.14038e-06	-1.84326e-11	1.81401e-11
map-data-2021.01.25-17.48.04.912_0760.jpk-force	760	-1.91406e-06	-1.60156e-06	-7.37576e-09	1.03407e-05	4.59802e-12	-8.03548e-05	-1.20723e-12	-1.14296e-06	3.86392e-11	-1.17699e-06	1.58135e-11	8.03868e-12
map-data-2021.01.25-17.48.04.912_0761.jpk-force	761	-1.99219e-06	-1.60156e-06	-7.32728e-09	1.07498e-05	2.05975e-11	-4.48567e-05	-5.45791e-11	-8.17909e-07	1.36279e-11	-6.78518e-07	-2.0315e-11	1.76594e-11
map-data-2021.01.25-17.48.04.912_0762.jpk-force	762	-2.07031e-06	-1.60156e-06	-7.28365e-09	1.0352e-05	1.42016e-11	-3.28491e-05	-1.98209e-11	-9.09016e-07	2.95378e-11	-7.58608e-07	4.98298e-12	8.05204e-12
map-data-2021.01.25-17.48.04.912_0763.jpk-force	763	-2.14844e-06	-1.60156e-06	-7.40222e-09	1.07904e-05	3.46095e-12	-8.50137e-05	-1.45436e-11	-5.99477e-07	2.50108e-11	-7.08526e-07	4.3591e-12	7.65689e-12
map-data-2021.01.25-17.48.04.912_0764.jpk-force	764	-2.22656e-06	-1.60156e-06	-7.34257e-09	1.14442e-05	2.83413e-11	-5.32954e-05	-2.17851e-11	-9.23978e-07	5.65177e-12	-9.41318e-07	-8.78732e-12	7.58915e-12
map-data-2021.01.25-17.48.04.912_0765.jpk-force	765	-2.30469e-06	-1.60156e-06	-7.44469e-09	1.08142e-05	-5.04656e-13	-8.87306e-05	-1.18877e-11	-9.10681e-07	1.84483e-11	-9.28022e-07	9.27679e-13	7.98025e-12
map-data-2021.01.25-17.48.04.912_0766.jpk-force	766	-2.38281e-06	-1.60156e-06	-7.41199e-09	1.15936e-05	1.14858e-11	-6.76108e-05	-6.64195e-11	-2.16015e-06	5.4207e-13	-2.1091e-06	-3.31065e-11	1.71017e-11
map-data-2021.01.25-17.48.04.912_0767.jpk-force	767	-2.46094e-06	-1.60156e-06	-7.5032e-09	1.08956e-05	1.74108e-11	-0.000101488	-7.74297e-12	-9.15273e-08	1.77877e-11	-9.68629e-08	5.83813e-12	8.06088e-12
map-data-2021.01.25-17.48.04.912_0768.jpk-force	768	-2.46094e-06	-1.52344e-06	-7.45051e-09	1.09101e-05	1.25643e-13	-7.50315e-05	-4.95191e-11	-2.10717e-06	2.04132e-11	-2.00939e-06	-1.35476e-11	1.5279e-11
map-data-2021.01.25-17.48.04.912_0769.jpk-force	769	-2.38281e-06	-1.52344e-06	-7.45444e-09	1.07867e-05	4.02987e-11	-4.91819e-05	-5.2484e-11	-9.23061e-07	2.4282e-11	-8.83044e-07	-8.80515e-12	2.1254e-11
map-data-2021.01.25-17.48.04.912_0770.jpk-force	770	-2.30469e-06	-1.52344e-06	-7.42166e-09	1.07346e-05	-1.42301e-12	-0.000106219	-1.31301e-11	-5.68044e-07	2.12107e-11	-5.73046e-07	5.24586e-12	6.75363e-12
map-data-2021.01.25-17.48.04.912_0771.jpk-force	771	-2.22656e-06	-1.52344e-06	-7.44141e-09	1.20299e-05	1.23406e-11	-3.95661e-05	-1.30236e-11	-5.87926e-07	1.49522e-11	-5.61915e-07	3.71767e-13	5.89065e-12
map-data-2021.01.25-17.48.04.912_0772.jpk-force	772	-2.14844e-06	-1.52344e-06	-7.42146e-09	1.05092e-05	1.47293e-11	-6.61129e-05	-1.65617e-11	-5.97081e-07	1.24646e-11	-5.77739e-07	8.52924e-13	6.32012e-12
map-data-2021.01.25-17.48.04.912_0773.jpk-force	773	-2.07031e-06	-1.52344e-06	-7.4142e-09	1.10744e-05	4.8624e-11	-5.83957e-05	-4.74544e-11	-2.38405e-06	1.7493e-11	-2.31197e-06	-1.59642e-11	1.63362e-11
map-data-2021.01.25-17.48.04.912_0774.jpk-force	774	-1.99219e-06	-1.52344e-06	-7.41764e-09	1.10837e-05	2.39345e-12	-6.17625e-05	-1.33408e-11	-2.45757e-06	3.42133e-11	-2.46291e-06	7.83503e-12	8.33979e-12
map-data-2021.01.25-17.48.04.912_0775.jpk-force	775	-1.91406e-06	-1.52344e-06	-7.40296e-09	1.06814e-05	1.30738e-11	-7.74954e-05	-1.20412e-11	-1.9379e-07	1.5332e-11	-1.76782e-07	2.97073e-12	7.65461e-12
map-data-2021.01.25-17.48.04.912_0776.jpk-force	776	-1.83594e-06	-1.52344e-06	-7.43372e-09	1.13978e-05	1.5544e-11	-4.48525e-05	-3.89236e-11	-1.59866e-06	2.14897e-11	-1.56564e-06	-1.40713e-11	1.40709e-11
map-data-2021.01.25-17.48.04.912_0777.jpk-force	777	-1.75781e-06	-1.52344e-06	-7.39757e-09	9.95218e-06	3.11976e-11	-3.08704e-05	-7.54809e-12	-5.57481e-07	2.10482e-11	-5.51812e-07	8.42854e-12	8.54199e-12
map-data-2021.01.25-17.48.04.912_0778.jpk-force	778	-1.67969e-06	-1.52344e-06	-7.41522e-09	1.08155e-05	1.62146e-11	-4.53982e-05	-1.03169e-11	-5.57855e-07	1.52976e-11	-5.64525e-07	-7.52632e-13	7.1292e-12
map-data-2021.01.25-17.48.04.912_0779.jpk-force	779	-1.60156e-06	-1.52344e-06	-7.41649e-09	1.00498e-05	2.15335e-11	-2.31245e-05	-4.23402e-12	-5.57461e-07	1.63577e-11	-5.51792e-07	5.00194e-12	6.00349e-12
map-data-2021.01.25-17.48.04.912_0780.jpk-force	780	-1.52344e-06	-1.52344e-06	-7.44081e-09	1.02424e-05	5.76994e-11	-5.73312e-05	-1.59314e-11	-1.05172e-06	1.49965e-11	-1.05672e-06	-4.22369e-13	8.30355e-12
map-data-2021.01.25-17.48.04.912_0781.jpk-force	781	-1.44531e-06	-1.52344e-06	-7.39029e-09	9.9993e-06	-7.26726e-12	-6.29477e-05	-8.89921e-12	-1.05487e-06	1.03783e-11	-1.04987e-06	2.14632e-12	5.37678e-12
map-data-2021.01.25-17.48.04.912_0782.jpk-force	782	-1.36719e-06	-1.52344e-06	-7.37749e-09	1.06805e-05	2.25541e-12	-5.91366e-05	-1.11791e-13	-1.05277e-06	1.44059e-11	-1.0431e-06	7.1589e-12	4.23077e-12
map-data-2021.01.25-17.48.04.912_0783.jpk-force	783	-1.28906e-06	-1.52344e-06	-7.34424e-09	1.04104e-05	-9.00457e-12	-6.81452e-05	-3.71267e-11	-2.51158e-06	2.22782e-11	-2.43883e-06	-4.06921e-12	1.27733e-11
map-data-2021.01.25-17.48.04.912_0784.jpk-force	784	-1.21094e-06	-1.52344e-06	-7.40193e-09	1.10279e-05	6.4903e-12	-5.94462e-05	-1.53631e-11	-1.40399e-06	1.73243e-11	-1.37297e-06	-3.15836e-13	8.12254e-12
map-data-2021.01.25-17.48.04.912_0785.jpk-force	785	-1.13281e-06	-1.52344e-06	-7.36476e-09	1.04316e-05	6.17089e-12	-4.9188e-05	-1.64934e-11	-1.37918e-06	1.46577e-11	-1.39785e-06	-1.46006e-12	6.52394e-12
map-data-2021.01.25-17.48.04.912_0786.jpk-force	786	-1.05469e-06	-1.52344e-06	-7.35769e-09	1.04338e-05	8.25701e-12	-5.174e-05	-2.27518e-12	-1.44586e-06	1.28094e-11	-1.45053e-06	6.5177e-12	5.15879e-12
map-data-2021.01.25-17.48.04.912_0787.jpk-force	787	-9.76563e-07	-1.52344e-06	-7.35149e-09	1.01761e-05	1.32425e-11	-4.77635e-05	-6.65811e-13	-1.44694e-06	1.14747e-11	-1.45161e-06	3.50787e-12	4.6007e-12
map-data-2021.01.25-17.48.04.912_0788.jpk-force	788	-8.98437e-07	-1.52344e-06	-7.34951e-09	1.05496e-05	-9.60239e-12	-6.73606e-05	-4.34682e-11	-2.20927e-06	1.70051e-11	-2.14887e-06	-1.05009e-11	1.48474e-11
map-data-2021.01.25-17.48.04.912_0789.jpk-force	789	-8.20313e-07	-1.52344e-06	-7.4819e-09	1.0381e-05	1.34366e-11	-5.78507e-05	-4.24022e-11	-2.17121e-06	2.61322e-11	-2.07443e-06	-3.50503e-12	1.45025e-11
map-data-2021.01.25-17.48.04.912_0790.jpk-force	790	-7.42187e-07	-1.52344e-06	-7.45326e-09	1.04655e-05	1.70722e-11	-5.62561e-05	-6.40808e-12	-2.11539e-06	3.32715e-11	-2.1254e-06	1.23745e-11	8.57738e-12
map-data-2021.01.25-17.48.04.912_0791.jpk-force	791	-6.64063e-07	-1.52344e-06	-7.37428e-09	1.02258e-05	5.45574e-12	-5.82909e-05	-1.81001e-11	-1.29736e-06	1.56359e-11	-1.27668e-06	4.7142e-14	8.25535e-12
map-data-2021.01.25-17.48.04.912_0792.jpk-force	792	-5.85938e-07	-1.52344e-06	-7.3792e-09	1.0199e-05	1.99711e-11	-6.10464e-05	-5.06302e-11	-2.39034e-06	1.56093e-11	-2.30623e-06	-1.58381e-11	1.46931e-11
map-data-2021.01.25-17.48.04.912_0793.jpk-force	793	-5.07813e-07	-1.52344e-06	-7.36265e-09	1.03194e-05	1.46508e-11	-4.65119e-05	-6.21724e-11	-1.78256e-06	2.14138e-11	-1.516e-06	-3.04253e-11	1.85293e-11
map-data-2021.01.25-17.48.04.912_0794.jpk-force	794	-4.29688e-07	-1.52344e-06	-7.34765e-09	1.01467e-05	8.72646e-11	-9.34973e-06	-1.74099e-11	-1.75521e-06	2.26944e-11	-1.76122e-06	9.76598e-13	8.21545e-12
map-data-2021.01.25-17.48.04.912_0795.jpk-force	795	-3.51563e-07	-1.52344e-06	-7.41395e-09	1.03484e-05	3.20593e-11	-5.84164e-05	-8.8363e-12	-1.16845e-06	1.50161e-11	-1.18513e-06	2.7981e-12	5.89074e-12
map-data-2021.01.25-17.48.04.912_0796.jpk-force	796	-2.73438e-07	-1.52344e-06	-7.38533e-09	1.04546e-05	4.40883e-12	-5.76724e-05	-1.29146e-11	-1.4934e-06	1.76297e-11	-1.47505e-06	1.4463e-12	6.30962e-12
map-data-2021.01.25-17.48.04.912_0797.jpk-force	797	-1.95313e-07	-1.52344e-06	-7.40137e-09	1.04145e-05	8.81004e-12	-6.02564e-05	-4.86031e-11	-1.54643e-06	2.05314e-11	-1.53909e-06	-7.54856e-12	1.47239e-11
map-data-2021.01.25-17.48.04.912_0798.jpk-force	798	-1.17188e-07	-1.52344e-06	-7.3869e-09	1.02954e-05	4.1658e-11	-5.9707e-05	-6.35925e-11	-9.85872e-07	2.19186e-11	-9.51858e-07	-1.91723e-11	2.62309e-11
map-data-2021.01.25-17.48.04.912_0799.jpk-force	799	-3.90635e-08	-1.52344e-06	-7.3941e-09	9.84726e-06	6.24356e-11	-5.82491e-05	-6.56419e-11	-1.09385e-06	6.87669e-12	-1.03713e-06	-2.3677e-11	1.58392e-11
map-data-2021.01.25-17.48.04.912_0800.jpk-force	800	3.90618e-08	-1.52344e-06	-7.38217e-09	1.073e-05	1.78887e-11	-4.10541e-05	-1.5933e-11	-8.85507e-08	1.11401e-11	-9.5554e-08	-5.49434e-13	6.5233e-12
map-data-2021.01.25-17.48.04.912_0801.jpk-force	801	1.17188e-07	-1.52344e-06	-7.34895e-09	9.85639e-06	1.14969e-11	-7.24381e-05	-5.09964e-11	-1.00008e-06	1.34127e-11	-9.28037e-07	-1.77071e-11	1.58401e-11
map-data-2021.01.25-17.48.04.912_0802.jpk-force	802	1.95312e-07	-1.52344e-06	-7.41242e-09	1.06641e-05	3.53576e-11	-3.10775e-05	-6.14994e-12	-1.10442e-06	1.76949e-11	-1.10809e-06	4.21866e-12	5.81298e-12
map-data-2021.01.25-17.48.04.912_0803.jpk-force	803	2.73438e-07	-1.52344e-06	-7.36095e-09	9.02491e-06	2.80597e-11	-1.79572e-05	-1.84025e-11	7.81395e-07	1.35323e-11	7.45045e-07	4.767e-13	7.09037e-12
map-data-2021.01.25-17.48.04.912_0804.jpk-force	804	3.51562e-07	-1.52344e-06	-7.30392e-09	1.01149e-05	2.19334e-11	-4.64887e-05	-1.82419e-11	-1.5052e-06	1.17327e-11	-1.5092e-06	-9.59128e-13	7.02073e-12
map-data-2021.01.25-17.48.04.912_0805.jpk-force	805	4.29686e-07	-1.52344e-06	-7.43322e-09	1.0162e-05	4.42459e-12	-6.3938e-05	-1.324e-11	-1.48991e-06	1.57876e-11	-1.51026e-06	2.00021e-12	7.04607e-12
map-data-2021.01.25-17.48.04.912_0806.jpk-force	806	5.07812e-07	-1.52344e-06	-7.38786e-09	1.02701e-05	-1.64992e-11	-6.21169e-05	-1.37565e-11	-1.50733e-06	1.64865e-11	-1.48765e-06	-1.82855e-12	6.43489e-12
map-data-2021.01.25-17.48.04.912_0807.jpk-force	807	5.85936e-07	-1.52344e-06	-7.36764e-09	1.02836e-05	1.81961e-11	-4.70726e-05	-1.62573e-11	-1.50367e-06	1.26961e-11	-1.48733e-06	6.62634e-13	6.40945e-12
map-data-2021.01.25-17.48.04.912_0808.jpk-force	808	6.64062e-07	-1.52344e-06	-7.35411e-09	9.03721e-06	1.76259e-11	-7.37508e-05	-1.04944e-11	-4.81035e-07	1.72017e-11	-4.72361e-07	1.72807e-12	8.52221e-12
map-data-2021.01.25-17.48.04.912_0809.jpk-force	809	7.42187e-07	-1.52344e-06	-7.36375e-09	1.02523e-05	1.83084e-11	-4.68495e-05	-1.38278e-11	-1.21846e-06	2.13577e-11	-1.21345e-06	9.48515e-13	1.00259e-11
map-data-2021.01.25-17.48.04.912_0810.jpk-force	810	8.20312e-07	-1.52344e-06	-7.36982e-09	1.02846e-05	1.30881e-11	-5.04354e-05	-1.82143e-11	-1.21929e-06	1.82827e-11	-1.2243e-06	2.03197e-13	8.26195e-12
map-data-2021.01.25-17.48.04.912_0811.jpk-force	811	8.98437e-07	-1.52344e-06	-7.37538e-09	1.04074e-05	1.5929e-11	-5.12525e-05	-3.33869e-11	-2.16952e-06	2.04838e-11	-2.03371e-06	-1.06689e-11	1.06418e-11
map-data-2021.01.25-17.48.04.912_0812.jpk-force	812	9.76562e-07	-1.52344e-06	-7.36007e-09	1.02102e-05	-3.38558e-12	-6.13e-05	-4.83696e-12	-1.84365e-06	2.22128e-11	-1.83631e-06	7.24178e-12	8.14647e-12
map-data-2021.01.25-17.48.04.912_0813.jpk-force	813	1.05469e-06	-1.52344e-06	-7.35237e-09	1.06746e-05	6.7117e-12	-4.95102e-05	-1.32017e-11	-1.51629e-06	1.1268e-11	-1.52063e-06	1.99308e-12	6.18527e-12
map-data-2021.01.25-17.48.04.912_0814.jpk-force	814	1.13281e-06	-1.52344e-06	-7.34126e-09	1.02415e-05	1.01271e-11	-4.325e-05	-4.42811e-11	-1.28719e-06	2.05065e-11	-1.1768e-06	-6.45464e-12	1.3945e-11
map-data-2021.01.25-17.48.04.912_0815.jpk-force	815	1.21094e-06	-1.52344e-06	-7.36084e-09	1.00258e-05	2.77836e-11	-1.13325e-05	-1.08668e-11	-1.18237e-06	3.72812e-11	-1.30412e-06	1.26287e-11	8.19062e-12
map-data-2021.01.25-17.48.04.912_0816.jpk-force	816	1.28906e-06	-1.52344e-06	-7.3577e-09	1.01441e-05	1.9562e-11	-3.96874e-05	-7.76992e-12	-1.23686e-06	1.75155e-11	-1.24086e-06	5.49921e-12	6.72615e-12
map-data-2021.01.25-17.48.04.912_0817.jpk-force	817	1.36719e-06	-1.52344e-06	-7.32656e-09	1.01033e-05	8.9273e-12	-4.94786e-05	-9.54245e-12	-1.21786e-06	2.04853e-11	-1.21319e-06	4.30209e-12	7.58906e-12
map-data-2021.01.25-17.48.04.912_0818.jpk-force	818	1.44531e-06	-1.52344e-06	-7.34845e-09	9.98673e-06	-9.99603e-13	-5.79232e-05	-3.94957e-12	-1.23158e-06	2.41258e-11	-1.21157e-06	8.77895e-12	6.70495e-12
map-data-2021.01.25-17.48.04.912_0819.jpk-force	819	1.52344e-06	-1.52344e-06	-7.35614e-09	1.04236e-05	1.51622e-11	-4.51927e-05	-1.12122e-11	-1.23491e-06	8.73979e-12	-1.24191e-06	-4.92412e-13	4.78641e-12
map-data-2021.01.25-17.48.04.912_0820.jpk-force	820	1.60156e-06	-1.52344e-06	-7.33655e-09	9.89523e-06	-4.61754e-12	-5.82647e-05	-7.45731e-12	-1.22154e-06	1.92311e-11	-1.24088e-06	3.04993e-12	6.5558e-12
map-data-2021.01.25-17.48.04.912_0821.jpk-force	821	1.67969e-06	-1.52344e-06	-7.38585e-09	1.0291e-05	2.67021e-11	-4.19715e-05	-1.36032e-11	-1.21982e-06	1.207e-11	-1.21249e-06	2.32074e-12	6.69953e-12
map-data-2021.01.25-17.48.04.912_0822.jpk-force	822	1.75781e-06	-1.52344e-06	-7.36973e-09	1.0441e-05	-1.77595e-11	-6.088e-05	-4.0721e-11	-2.79326e-06	2.55461e-11	-2.73687e-06	-6.11838e-12	1.36204e-11
map-data-2021.01.25-17.48.04.912_0823.jpk-force	823	1.83594e-06	-1.52344e-06	-7.35027e-09	1.04141e-05	9.11938e-12	-5.39609e-05	-1.51231e-11	-1.83121e-06	2.61025e-11	-1.81286e-06	5.19935e-12	9.7028e-12
map-data-2021.01.25-17.48.04.912_0824.jpk-force	824	1.91406e-06	-1.52344e-06	-7.35941e-09	9.79534e-06	2.39312e-11	-4.98335e-05	-1.28619e-11	-1.74159e-06	2.17302e-11	-1.74626e-06	1.68023e-12	9.45542e-12
map-data-2021.01.25-17.48.04.912_0825.jpk-force	825	1.99219e-06	-1.52344e-06	-7.35783e-09	1.02222e-05	1.41629e-11	-3.32922e-05	-1.20161e-11	-7.39781e-07	9.42827e-12	-7.32445e-07	1.18175e-12	4.84526e-12
map-data-2021.01.25-17.48.04.912_0826.jpk-force	826	2.07031e-06	-1.52344e-06	-7.38363e-09	1.01347e-05	7.73162e-11	-3.10614e-05	-1.89391e-11	-9.31856e-07	2.0178e-11	-9.26187e-07	1.43828e-12	9.56978e-12
map-data-2021.01.25-17.48.04.912_0827.jpk-force	827	2.14844e-06	-1.52344e-06	-7.39164e-09	1.03866e-05	6.12866e-12	-7.5109e-05	-1.78773e-11	-1.03638e-06	2.01025e-11	-1.01804e-06	-1.9735e-12	7.47061e-12
map-data-2021.01.25-17.48.04.912_0828.jpk-force	828	2.22656e-06	-1.52344e-06	-7.35595e-09	1.03844e-05	1.54735e-11	-5.77996e-05	-1.16085e-11	-9.86768e-07	2.17477e-11	-1.01978e-06	1.31282e-12	6.8895e-12
map-data-2021.01.25-17.48.04.912_0829.jpk-force	829	2.30469e-06	-1.52344e-06	-7.35724e-09	1.02288e-05	-1.46865e-12	-5.98517e-05	-1.45993e-11	-1.01191e-06	1.67736e-11	-1.01691e-06	2.63404e-13	7.58452e-12
map-data-2021.01.25-17.48.04.912_0830.jpk-force	830	2.38281e-06	-1.52344e-06	-7.35919e-09	1.01421e-05	1.05737e-11	-5.10965e-05	-1.62033e-11	-9.8663e-07	2.03912e-11	-9.93966e-07	1.98728e-12	8.74104e-12
map-data-2021.01.25-17.48.04.912_0831.jpk-force	831	2.46094e-06	-1.52344e-06	-7.36107e-09	1.01549e-05	2.18197e-11	-4.79204e-05	-1.97728e-11	-9.99795e-07	1.75783e-11	-1.01013e-06	-7.60266e-13	7.57787e-12
map-data-2021.01.25-17.48.04.912_0832.jpk-force	832	2.46094e-06	-1.44531e-06	-7.37268e-09	1.02897e-05	3.56842e-11	-4.14695e-05	-1.13181e-11	-9.791e-07	2.26058e-11	-1.03512e-06	4.6678e-12	7.44714e-12
map-data-2021.01.25-17.48.04.912_0833.jpk-force	833	2.38281e-06	-1.44531e-06	-7.35602e-09	1.01134e-05	1.13541e-11	-5.00042e-05	-1.62088e-11	-1.00161e-06	1.84487e-11	-1.04296e-06	-4.33999e-13	6.99855e-12
map-data-2021.01.25-17.48.04.912_0834.jpk-force	834	2.30469e-06	-1.44531e-06	-7.33997e-09	9.99918e-06	2.23254e-11	-4.43515e-05	-1.83475e-11	-1.00044e-06	1.90204e-11	-1.01778e-06	-5.40161e-13	7.52022e-12
map-data-2021.01.25-17.48.04.912_0835.jpk-force	835	2.22656e-06	-1.44531e-06	-7.36557e-09	1.00997e-05	1.52457e-11	-5.00791e-05	-1.78989e-11	-1.0104e-06	1.82309e-11	-9.9206e-07	4.56147e-13	8.11612e-12
map-data-2021.01.25-17.48.04.912_0836.jpk-force	836	2.14844e-06	-1.44531e-06	-7.36753e-09	1.01269e-05	6.39108e-12	-5.49667e-05	-1.86839e-11	-9.77315e-07	1.88862e-11	-1.00899e-06	9.30699e-13	8.17795e-12
map-data-2021.01.25-17.48.04.912_0837.jpk-force	837	2.07031e-06	-1.44531e-06	-7.35784e-09	1.02609e-05	-4.59498e-12	-6.33826e-05	-1.95558e-11	-9.89099e-07	1.30424e-11	-1.01811e-06	-1.46626e-12	7.23867e-12
map-data-2021.01.25-17.48.04.912_0838.jpk-force	838	1.99219e-06	-1.44531e-06	-7.34466e-09	1.0225e-05	1.22288e-11	-5.02536e-05	-1.51356e-11	-1.00925e-06	2.0098e-11	-1.02792e-06	9.74643e-13	8.25988e-12
map-data-2021.01.25-17.48.04.912_0839.jpk-force	839	1.91406e-06	-1.44531e-06	-7.39179e-09	1.02386e-05	2.57816e-12	-6.83028e-05	-2.02671e-11	-9.89362e-07	2.36984e-11	-1.0067e-06	-3.14126e-12	8.54868e-12
map-data-2021.01.25-17.48.04.912_0840.jpk-force	840	1.83594e-06	-1.44531e-06	-7.38722e-09	1.01403e-05	5.93694e-11	-1.1305e-05	-2.31427e-11	-9.77342e-07	2.32422e-11	-1.0337e-06	4.00081e-12	9.83814e-12
map-data-2021.01.25-17.48.04.912_0841.jpk-force	841	1.75781e-06	-1.44531e-06	-7.37456e-09	1.04894e-05	1.82697e-11	-2.55727e-05	-3.1224e-11	-1.02628e-06	2.73596e-11	-9.73924e-07	-1.39279e-12	1.73868e-11
map-data-2021.01.25-17.48.04.912_0842.jpk-force	842	1.67969e-06	-1.44531e-06	-7.37711e-09	1.03845e-05	3.09225e-11	-3.85421e-05	-1.77057e-11	-9.88624e-07	1.60268e-11	-9.94293e-07	-2.33542e-12	7.23725e-12
map-data-2021.01.25-17.48.04.912_0843.jpk-force	843	1.60156e-06	-1.44531e-06	-7.39548e-09	1.07064e-05	2.79868e-11	-3.86002e-05	-1.96663e-11	-1.03877e-06	1.48815e-11	-1.01843e-06	-6.60557e-13	6.25674e-12
map-data-2021.01.25-17.48.04.912_0844.jpk-force	844	1.52344e-06	-1.44531e-06	-7.38043e-09	1.02333e-05	1.87499e-11	-5.343e-05	-2.01481e-11	-9.73886e-07	2.09586e-11	-9.6955e-07	-1.96125e-12	7.98786e-12
map-data-2021.01.25-17.48.04.912_0845.jpk-force	845	1.44531e-06	-1.44531e-06	-7.41545e-09	1.03123e-05	8.07271e-12	-3.92521e-05	-1.81091e-11	-1.00046e-06	1.81158e-11	-1.02047e-06	7.2513e-14	8.0734e-12
map-data-2021.01.25-17.48.04.912_0846.jpk-force	846	1.36719e-06	-1.44531e-06	-7.3743e-09	1.01856e-05	8.87358e-14	-6.35537e-05	-1.35105e-11	-1.03845e-06	2.34146e-11	-1.01044e-06	1.92871e-12	8.4435e-12
map-data-2021.01.25-17.48.04.912_0847.jpk-force	847	1.28906e-06	-1.44531e-06	-7.38267e-09	1.01998e-05	2.48767e-11	-3.64616e-05	-1.51582e-11	-1.039e-06	1.86286e-11	-1.03299e-06	1.22708e-12	8.0894e-12
map-data-2021.01.25-17.48.04.912_0848.jpk-force	848	1.21094e-06	-1.44531e-06	-7.40012e-09	1.04639e-05	8.4366e-12	-6.04787e-05	-2.04516e-11	-1.01445e-06	1.851e-11	-1.01878e-06	-1.61107e-12	7.81e-12
map-data-2021.01.25-17.48.04.912_0849.jpk-force	849	1.13281e-06	-1.44531e-06	-7.40035e-09	1.06355e-05	5.1147e-12	-5.15526e-05	-1.85697e-11	-1.02444e-06	1.91732e-11	-1.03311e-06	-1.85909e-13	7.60019e-12
map-data-2021.01.25-17.48.04.912_0850.jpk-force	850	1.05469e-06	-1.44531e-06	-7.39223e-09	1.04046e-05	-1.42173e-12	-6.22464e-05	-1.46554e-11	-9.98092e-07	1.53237e-11	-1.01777e-06	-2.93809e-13	7.18424e-12
map-data-2021.01.25-17.48.04.912_0851.jpk-force	851	9.76563e-07	-1.44531e-06	-7.3952e-09	1.05203e-05	-1.01301e-11	-6.55705e-05	-1.17134e-11	-1.02493e-06	2.77182e-11	-1.00726e-06	4.8158e-12	7.47663e-12
map-data-2021.01.25-17.48.04.912_0852.jpk-force	852	8.98437e-07	-1.44531e-06	-7.40315e-09	1.04207e-05	2.48238e-11	-4.76742e-05	-1.64229e-11	-1.02558e-06	1.95687e-11	-1.00557e-06	6.76596e-13	8.54836e-12
map-data-2021.01.25-17.48.04.912_0853.jpk-force	853	8.20312e-07	-1.44531e-06	-7.38504e-09	1.05935e-05	3.0321e-11	-4.09285e-05	-1.39893e-11	-9.99346e-07	2.09129e-11	-1.00768e-06	3.53093e-12	6.97705e-12
map-data-2021.01.25-17.48.04.912_0854.jpk-force	854	7.42187e-07	-1.44531e-06	-7.40686e-09	1.05484e-05	9.93242e-12	-6.25142e-05	-1.52288e-11	-1.0123e-06	1.79183e-11	-9.96297e-07	1.44929e-12	7.86672e-12
map-data-2021.01.25-17.48.04.912_0855.jpk-force	855	6.64062e-07	-1.44531e-06	-7.38423e-09	1.03753e-05	1.80663e-11	-4.35999e-05	-1.99902e-11	-9.98053e-07	1.70665e-11	-9.87715e-07	-3.24078e-13	6.89623e-12
map-data-2021.01.25-17.48.04.912_0856.jpk-force	856	5.85938e-07	-1.44531e-06	-7.38856e-09	1.06567e-05	8.06963e-12	-5.83463e-05	-3.60138e-11	-2.26121e-06	1.43567e-11	-2.37168e-06	-1.05956e-11	9.98569e-12
map-data-2021.01.25-17.48.04.912_0857.jpk-force	857	5.07813e-07	-1.44531e-06	-7.43796e-09	1.05339e-05	4.87138e-11	-4.09748e-05	-1.52956e-11	-2.25035e-06	2.93195e-11	-2.37384e-06	8.07032e-12	8.63869e-12
map-data-2021.01.25-17.48.04.912_0858.jpk-force	858	4.29687e-07	-1.44531e-06	-7.45774e-09	1.06493e-05	1.66238e-12	-5.78018e-05	-5.49829e-12	-2.27471e-06	3.66439e-11	-2.28405e-06	1.57875e-11	8.25014e-12
map-data-2021.01.25-17.48.04.912_0859.jpk-force	859	3.51563e-07	-1.44531e-06	-7.39431e-09	1.05875e-05	4.60143e-12	-5.20634e-05	-1.4627e-11	-2.27525e-06	3.82742e-11	-2.35968e-06	5.67133e-12	1.00367e-11
map-data-2021.01.25-17.48.04.912_0860.jpk-force	860	2.73438e-07	-1.44531e-06	-7.39316e-09	1.00943e-05	6.40007e-12	-6.16944e-05	-1.31742e-11	-2.29799e-06	4.27448e-11	-2.38275e-06	1.72932e-11	1.06316e-11
map-data-2021.01.25-17.48.04.912_0861.jpk-force	861	1.95312e-07	-1.44531e-06	-7.41121e-09	1.06149e-05	4.42106e-11	-4.28827e-05	-1.24338e-11	-2.27697e-06	2.86931e-11	-2.38744e-06	1.11432e-11	8.12561e-12
map-data-2021.01.25-17.48.04.912_0862.jpk-force	862	1.17187e-07	-1.44531e-06	-7.40983e-09	1.04087e-05	1.61169e-11	-5.5035e-05	-1.38622e-11	-2.24975e-06	2.73788e-11	-2.38425e-06	5.08218e-12	7.5725e-12
map-data-2021.01.25-17.48.04.912_0863.jpk-force	863	3.90618e-08	-1.44531e-06	-7.41184e-09	1.04299e-05	1.42124e-11	-5.54519e-05	-1.3723e-11	-2.28722e-06	2.93769e-11	-2.34729e-06	8.3504e-12	8.28754e-12
map-data-2021.01.25-17.48.04.912_0864.jpk-force	864	-3.90623e-08	-1.44531e-06	-7.42416e-09	1.0633e-05	9.79355e-12	-5.45744e-05	-8.59249e-12	-2.34323e-06	3.32709e-11	-2.30685e-06	8.48291e-12	8.39635e-12
map-data-2021.01.25-17.48.04.912_0865.jpk-force	865	-1.17187e-07	-1.44531e-06	-7.40244e-09	1.07543e-05	1.168e-11	-5.01344e-05	-5.70406e-11	-1.72538e-06	1.64531e-11	-1.63964e-06	-2.78011e-11	1.827e-11
map-data-2021.01.25-17.48.04.912_0866.jpk-force	866	-1.95313e-07	-1.44531e-06	-7.39798e-09	1.09629e-05	-1.62138e-11	-6.77416e-05	-5.28645e-11	-2.52378e-06	2.1651e-11	-2.43734e-06	-1.61447e-11	1.7483e-11
map-data-2021.01.25-17.48.04.912_0867.jpk-force	867	-2.73438e-07	-1.44531e-06	-7.43332e-09	1.04818e-05	-2.6983e-10	-0.000209947	-7.24084e-11	-2.51013e-06	-2.53586e-11	-2.46575e-06	-5.04248e-11	8.41228e-12
map-data-2021.01.25-17.48.04.912_0868.jpk-force	868	-3.51563e-07	-1.44531e-06	-7.47739e-09	1.09021e-05	-3.03287e-11	-5.50677e-05	-7.38271e-12	-2.44269e-06	6.42685e-11	-2.52713e-06	2.54908e-11	1.33115e-11
map-data-2021.01.25-17.48.04.912_0869.jpk-force	869	-4.29688e-07	-1.44531e-06	-7.45888e-09	9.97025e-06	1.49932e-11	-8.72198e-05	-1.39758e-11	-2.98291e-07	1.90381e-11	-2.39597e-07	2.55902e-12	7.65809e-12
map-data-2021.01.25-17.48.04.912_0870.jpk-force	870	-5.07813e-07	-1.44531e-06	-7.45955e-09	1.04727e-05	1.83269e-11	-4.46109e-05	-4.9015e-11	-9.99989e-07	1.47971e-11	-9.28951e-07	-1.93717e-11	1.46346e-11
map-data-2021.01.25-17.48.04.912_0871.jpk-force	871	-5.85938e-07	-1.44531e-06	-7.46981e-09	1.08415e-05	-1.42566e-12	-6.1958e-05	-1.73363e-11	-1.62709e-06	1.69883e-11	-1.63176e-06	-2.90709e-12	7.57315e-12
map-data-2021.01.25-17.48.04.912_0872.jpk-force	872	-6.64063e-07	-1.44531e-06	-7.45596e-09	1.05813e-05	-3.2083e-11	-7.39456e-05	-4.6219e-11	-2.43091e-06	1.89826e-11	-2.37184e-06	-1.43938e-11	1.60643e-11
map-data-2021.01.25-17.48.04.912_0873.jpk-force	873	-7.42187e-07	-1.44531e-06	-7.48467e-09	1.05423e-05	4.93273e-12	-5.84381e-05	-6.29967e-11	-1.99997e-06	1.78218e-11	-1.94124e-06	-2.31561e-11	2.45285e-11
map-data-2021.01.25-17.48.04.912_0874.jpk-force	874	-8.20313e-07	-1.44531e-06	-7.52249e-09	1.06338e-05	2.79018e-11	-5.604e-05	-1.46323e-11	-1.45432e-06	1.70992e-11	-1.44765e-06	1.31078e-12	9.35132e-12
map-data-2021.01.25-17.48.04.912_0875.jpk-force	875	-8.98437e-07	-1.44531e-06	-7.51112e-09	1.07447e-05	-3.32921e-12	-4.97977e-05	-1.00534e-11	-1.44463e-06	1.68263e-11	-1.45197e-06	1.98151e-12	8.03719e-12
map-data-2021.01.25-17.48.04.912_0876.jpk-force	876	-9.76563e-07	-1.44531e-06	-7.57384e-09	1.05199e-05	3.06445e-11	-5.45569e-05	-1.37556e-11	-1.58391e-06	1.7279e-11	-1.58858e-06	-1.11287e-12	7.47063e-12
map-data-2021.01.25-17.48.04.912_0877.jpk-force	877	-1.05469e-06	-1.44531e-06	-7.57061e-09	1.08952e-05	1.18808e-11	-5.96197e-05	-1.25777e-11	-1.25279e-06	1.22236e-11	-1.24645e-06	4.26078e-13	6.02382e-12
map-data-2021.01.25-17.48.04.912_0878.jpk-force	878	-1.13281e-06	-1.44531e-06	-7.49146e-09	1.06685e-05	2.67146e-11	-3.25058e-05	-3.4911e-11	-2.19837e-06	1.37361e-11	-2.15499e-06	-1.01364e-11	1.04816e-11
map-data-2021.01.25-17.48.04.912_0879.jpk-force	879	-1.21094e-06	-1.44531e-06	-7.48643e-09	1.05438e-05	2.985e-11	-4.50462e-05	-1.46858e-11	-1.14188e-06	4.90498e-12	-1.14788e-06	-3.71543e-12	4.33928e-12
map-data-2021.01.25-17.48.04.912_0880.jpk-force	880	-1.28906e-06	-1.44531e-06	-7.52662e-09	9.89422e-06	5.08038e-11	-5.01013e-05	-5.17498e-11	8.99512e-08	1.46977e-11	1.4831e-07	-2.44308e-11	1.66708e-11
map-data-2021.01.25-17.48.04.912_0881.jpk-force	881	-1.36719e-06	-1.44531e-06	-7.52089e-09	1.08909e-05	1.59181e-11	-5.14047e-05	-5.59653e-11	-9.99265e-07	1.85535e-11	-9.27902e-07	-2.00645e-11	1.95141e-11
map-data-2021.01.25-17.48.04.912_0882.jpk-force	882	-1.44531e-06	-1.44531e-06	-7.50281e-09	1.02646e-05	4.58807e-11	-4.68581e-05	-5.15917e-11	2.60131e-07	1.46446e-11	2.8014e-07	-2.63357e-11	1.64243e-11
map-data-2021.01.25-17.48.04.912_0883.jpk-force	883	-1.52344e-06	-1.44531e-06	-7.47367e-09	1.08191e-05	2.12545e-12	-5.44983e-05	-1.68964e-11	-1.53605e-06	2.43194e-11	-1.48769e-06	8.12948e-13	7.35446e-12
map-data-2021.01.25-17.48.04.912_0884.jpk-force	884	-1.60156e-06	-1.44531e-06	-7.48769e-09	1.01717e-05	4.38987e-12	-0.00010958	-1.41387e-11	-5.05859e-07	9.14669e-14	-5.03191e-07	-8.95986e-12	4.64278e-12
map-data-2021.01.25-17.48.04.912_0885.jpk-force	885	-1.67969e-06	-1.44531e-06	-7.4887e-09	1.09952e-05	2.90509e-11	-4.21245e-05	-4.07755e-11	-1.77049e-06	1.22322e-11	-1.73546e-06	-1.70349e-11	1.57841e-11
map-data-2021.01.25-17.48.04.912_0886.jpk-force	886	-1.75781e-06	-1.44531e-06	-7.50866e-09	1.07547e-05	1.6872e-12	-6.67641e-05	-1.35845e-11	-1.06865e-06	1.65971e-11	-1.07365e-06	-1.57121e-12	5.67071e-12
map-data-2021.01.25-17.48.04.912_0887.jpk-force	887	-1.83594e-06	-1.44531e-06	-7.52615e-09	1.0683e-05	-8.31244e-12	-6.38344e-05	-1.25391e-11	-1.06141e-06	1.50687e-11	-1.0334e-06	1.01201e-12	6.34336e-12
map-data-2021.01.25-17.48.04.912_0888.jpk-force	888	-1.91406e-06	-1.44531e-06	-7.50131e-09	1.04897e-05	-2.5753e-12	-6.11112e-05	-1.4738e-11	-1.04413e-06	1.94767e-11	-1.06113e-06	4.42065e-13	8.57572e-12
map-data-2021.01.25-17.48.04.912_0889.jpk-force	889	-1.99219e-06	-1.44531e-06	-7.49685e-09	1.04291e-05	2.72989e-11	-3.66223e-05	-1.48638e-11	-1.03707e-06	1.28283e-11	-1.05908e-06	-5.43523e-13	6.08933e-12
map-data-2021.01.25-17.48.04.912_0890.jpk-force	890	-2.07031e-06	-1.44531e-06	-7.45823e-09	1.06133e-05	-3.82489e-11	-9.11851e-05	-1.32063e-11	-1.05412e-06	1.11252e-11	-1.07279e-06	-6.21249e-13	5.7853e-12
map-data-2021.01.25-17.48.04.912_0891.jpk-force	891	-2.14844e-06	-1.44531e-06	-7.4777e-09	1.03501e-05	6.6869e-12	-5.11205e-05	-5.12264e-11	-1.75845e-06	1.00575e-11	-1.72309e-06	-2.51054e-11	1.23479e-11
map-data-2021.01.25-17.48.04.912_0892.jpk-force	892	-2.22656e-06	-1.44531e-06	-7.53278e-09	1.02555e-05	4.7334e-12	-6.74478e-05	-1.27874e-11	-1.02234e-06	1.66013e-11	-1.01733e-06	4.37063e-13	7.15549e-12
map-data-2021.01.25-17.48.04.912_0893.jpk-force	893	-2.30469e-06	-1.44531e-06	-7.50174e-09	1.05812e-05	1.38925e-11	-5.52504e-05	-1.37547e-11	-9.77092e-07	1.54725e-11	-1.01711e-06	2.38303e-12	7.01103e-12
map-data-2021.01.25-17.48.04.912_0894.jpk-force	894	-2.38281e-06	-1.44531e-06	-7.50147e-09	1.05199e-05	2.28153e-11	-4.9161e-05	-3.89278e-11	-1.4527e-06	2.1127e-11	-1.394e-06	-8.41587e-12	1.42399e-11
map-data-2021.01.25-17.48.04.912_0895.jpk-force	895	-2.46094e-06	-1.44531e-06	-7.51944e-09	1.02647e-05	2.03908e-11	-4.87295e-05	-1.4058e-11	-6.3621e-07	1.35574e-11	-6.29207e-07	-3.80952e-13	7.22291e-12
map-data-2021.01.25-17.48.04.912_0896.jpk-force	896	-2.46094e-06	-1.36719e-06	-7.51698e-09	1.02339e-05	6.80289e-12	-5.25943e-05	-3.59276e-11	-1.36274e-06	2.42994e-11	-1.22467e-06	-8.28885e-12	1.26159e-11
map-data-2021.01.25-17.48.04.912_0897.jpk-force	897	-2.38281e-06	-1.36719e-06	-7.51742e-09	1.04691e-05	3.89971e-11	-1.80032e-05	-1.22276e-11	-1.49969e-06	2.34368e-11	-1.46267e-06	3.60786e-12	7.77109e-12
map-data-2021.01.25-17.48.04.912_0898.jpk-force	898	-2.30469e-06	-1.36719e-06	-7.49087e-09	1.04705e-05	8.84258e-12	-6.8862e-05	-1.89686e-11	-1.00199e-06	1.93502e-11	-9.84654e-07	2.49219e-12	7.42927e-12
map-data-2021.01.25-17.48.04.912_0899.jpk-force	899	-2.22656e-06	-1.36719e-06	-7.50837e-09	1.04928e-05	1.59025e-11	-4.47525e-05	-6.63467e-11	-2.06755e-06	1.99125e-11	-1.99649e-06	-2.75451e-11	2.02152e-11
map-data-2021.01.25-17.48.04.912_0900.jpk-force	900	-2.14844e-06	-1.36719e-06	-7.54838e-09	1.00519e-05	2.43958e-11	-4.84112e-05	-6.63896e-12	-1.76622e-06	1.99472e-11	-1.74587e-06	4.19521e-12	7.4284e-12
map-data-2021.01.25-17.48.04.912_0901.jpk-force	901	-2.07031e-06	-1.36719e-06	-7.5289e-09	1.08328e-05	1.87707e-11	-4.67902e-05	-5.85649e-12	-1.32207e-06	1.93013e-11	-1.31506e-06	3.4081e-12	7.30937e-12
map-data-2021.01.25-17.48.04.912_0902.jpk-force	902	-1.99219e-06	-1.36719e-06	-7.495e-09	1.00823e-05	1.69617e-11	-4.78324e-05	-1.63846e-11	-1.32174e-06	1.09047e-11	-1.3164e-06	-3.43481e-12	8.29391e-12
map-data-2021.01.25-17.48.04.912_0903.jpk-force	903	-1.91406e-06	-1.36719e-06	-7.52672e-09	1.01744e-05	1.39076e-11	-4.96095e-05	-1.53963e-11	-1.31024e-06	2.36826e-11	-1.31457e-06	3.81881e-12	1.02946e-11
map-data-2021.01.25-17.48.04.912_0904.jpk-force	904	-1.83594e-06	-1.36719e-06	-7.50682e-09	9.83721e-06	2.28103e-11	-4.75923e-05	-1.21629e-11	-1.31026e-06	1.03939e-11	-1.31359e-06	-1.85467e-12	6.15883e-12
map-data-2021.01.25-17.48.04.912_0905.jpk-force	905	-1.75781e-06	-1.36719e-06	-7.51888e-09	9.91155e-06	1.65802e-11	-4.54504e-05	-5.60332e-11	-1.57593e-06	1.70218e-11	-1.5042e-06	-2.17784e-11	1.63933e-11
map-data-2021.01.25-17.48.04.912_0906.jpk-force	906	-1.67969e-06	-1.36719e-06	-7.47358e-09	1.03505e-05	1.81119e-11	-4.18062e-05	-3.79195e-11	-1.54501e-06	2.22256e-11	-1.46062e-06	-6.37325e-12	1.2278e-11
map-data-2021.01.25-17.48.04.912_0907.jpk-force	907	-1.60156e-06	-1.36719e-06	-7.47575e-09	1.03496e-05	7.14802e-12	-5.08055e-05	-7.37494e-12	-6.59761e-07	1.00285e-11	-6.69098e-07	2.14688e-12	5.93622e-12
map-data-2021.01.25-17.48.04.912_0908.jpk-force	908	-1.52344e-06	-1.36719e-06	-7.50685e-09	1.04895e-05	3.17813e-11	-3.28526e-05	-9.6028e-12	-1.06469e-06	2.05754e-11	-1.08336e-06	3.50539e-12	7.85247e-12
map-data-2021.01.25-17.48.04.912_0909.jpk-force	909	-1.44531e-06	-1.36719e-06	-7.51023e-09	1.04102e-05	4.70585e-12	-5.83861e-05	-5.59644e-11	-2.63791e-06	2.27672e-11	-2.49039e-06	-1.85095e-11	2.12625e-11
map-data-2021.01.25-17.48.04.912_0910.jpk-force	910	-1.36719e-06	-1.36719e-06	-7.55131e-09	1.00537e-05	1.77154e-11	-6.13721e-05	-6.18801e-11	-8.94059e-07	1.15325e-11	-7.84671e-07	-3.29375e-11	1.60526e-11
map-data-2021.01.25-17.48.04.912_0911.jpk-force	911	-1.28906e-06	-1.36719e-06	-7.52329e-09	1.04292e-05	1.99129e-11	-4.40414e-05	-1.15235e-11	-9.18357e-07	1.87526e-11	-9.26694e-07	3.87652e-12	7.97546e-12
map-data-2021.01.25-17.48.04.912_0912.jpk-force	912	-1.21094e-06	-1.36719e-06	-7.47473e-09	1.05072e-05	1.704e-11	-5.0566e-05	-1.44283e-11	-9.09828e-07	1.29045e-11	-9.13162e-07	-2.6323e-12	7.17307e-12
map-data-2021.01.25-17.48.04.912_0913.jpk-force	913	-1.13281e-06	-1.36719e-06	-7.4781e-09	1.04218e-05	1.93835e-11	-4.38279e-05	-1.73772e-11	-9.2323e-07	1.27043e-11	-9.27565e-07	-8.32926e-13	8.83635e-12
map-data-2021.01.25-17.48.04.912_0914.jpk-force	914	-1.05469e-06	-1.36719e-06	-7.48757e-09	1.04453e-05	1.09189e-11	-5.00232e-05	-1.50602e-11	-9.09847e-07	1.49131e-11	-9.27521e-07	-1.0877e-12	7.43532e-12
map-data-2021.01.25-17.48.04.912_0915.jpk-force	915	-9.76563e-07	-1.36719e-06	-7.4816e-09	1.02471e-05	2.04577e-11	-4.63085e-05	-6.35424e-11	-2.04133e-06	2.50767e-11	-1.98293e-06	-2.10139e-11	2.59405e-11
map-data-2021.01.25-17.48.04.912_0916.jpk-force	916	-8.98437e-07	-1.36719e-06	-7.48248e-09	1.05631e-05	3.07434e-13	-5.74181e-05	-4.25116e-11	-2.30487e-06	1.47513e-11	-2.29086e-06	-1.55948e-11	1.56856e-11
map-data-2021.01.25-17.48.04.912_0917.jpk-force	917	-8.20313e-07	-1.36719e-06	-7.49522e-09	1.00344e-05	1.88624e-11	-5.55014e-05	-5.8215e-11	-1.60956e-06	1.94647e-11	-1.51379e-06	-2.81682e-11	1.93412e-11
map-data-2021.01.25-17.48.04.912_0918.jpk-force	918	-7.42187e-07	-1.36719e-06	-7.56866e-09	1.03604e-05	-1.0888e-11	-6.30722e-05	-4.92211e-11	-1.35378e-06	1.84096e-11	-1.3351e-06	-9.14726e-12	1.73806e-11
map-data-2021.01.25-17.48.04.912_0919.jpk-force	919	-6.64063e-07	-1.36719e-06	-7.48711e-09	1.0136e-05	1.89427e-11	-2.67191e-05	-1.92473e-11	-9.33163e-07	1.24966e-11	-9.50171e-07	-2.61006e-12	7.96744e-12
map-data-2021.01.25-17.48.04.912_0920.jpk-force	920	-5.85938e-07	-1.36719e-06	-7.42153e-09	1.04951e-05	4.87426e-12	-6.34738e-05	-1.38745e-11	-9.3681e-07	1.77668e-11	-9.40478e-07	4.39492e-13	7.36203e-12
map-data-2021.01.25-17.48.04.912_0921.jpk-force	921	-5.07813e-07	-1.36719e-06	-7.586e-09	1.05935e-05	6.53896e-11	-6.81269e-05	-5.94035e-12	-9.71902e-07	2.39618e-11	-9.67233e-07	1.17603e-11	6.51616e-12
map-data-2021.01.25-17.48.04.912_0922.jpk-force	922	-4.29688e-07	-1.36719e-06	-7.56457e-09	1.03512e-05	1.94934e-11	-4.85583e-05	-6.61437e-11	-1.6083e-06	1.30687e-11	-1.56392e-06	-2.48671e-11	2.09782e-11
map-data-2021.01.25-17.48.04.912_0923.jpk-force	923	-3.51563e-07	-1.36719e-06	-7.47103e-09	9.23997e-06	1.62407e-11	-0.000124604	-6.31788e-11	-6.71552e-07	9.76643e-12	-6.55538e-07	-2.85033e-11	2.0318e-11
map-data-2021.01.25-17.48.04.912_0924.jpk-force	924	-2.73438e-07	-1.36719e-06	-7.47861e-09	1.02125e-05	-3.54384e-11	-9.732e-05	-1.14271e-12	-6.75713e-07	3.10519e-11	-6.6671e-07	1.19313e-11	7.66795e-12
map-data-2021.01.25-17.48.04.912_0925.jpk-force	925	-1.95313e-07	-1.36719e-06	-7.57568e-09	1.12638e-05	-9.462e-13	-7.42646e-05	-1.56733e-11	-1.24749e-06	1.07926e-11	-1.2665e-06	1.12997e-12	6.1534e-12
map-data-2021.01.25-17.48.04.912_0926.jpk-force	926	-1.17188e-07	-1.36719e-06	-7.49526e-09	1.04953e-05	-9.93576e-13	-7.06437e-05	-1.49691e-11	-1.52391e-06	1.90402e-11	-1.5526e-06	3.6598e-13	8.00008e-12
map-data-2021.01.25-17.48.04.912_0927.jpk-force	927	-3.90635e-08	-1.36719e-06	-7.49008e-09	1.05367e-05	3.41203e-12	-5.92508e-05	-1.70066e-11	-1.55866e-06	2.36636e-11	-1.576e-06	4.84089e-13	8.048e-12
map-data-2021.01.25-17.48.04.912_0928.jpk-force	928	3.90618e-08	-1.36719e-06	-7.48742e-09	1.02609e-05	1.20735e-11	-5.72931e-05	-4.57071e-11	-1.81985e-06	2.02584e-11	-1.78815e-06	-2.30192e-11	1.16757e-11
map-data-2021.01.25-17.48.04.912_0929.jpk-force	929	1.17188e-07	-1.36719e-06	-7.48258e-09	1.02894e-05	1.40198e-11	-4.87391e-05	-9.461e-12	-1.78825e-06	-1.45815e-12	-1.78558e-06	-5.84952e-12	2.44705e-12
map-data-2021.01.25-17.48.04.912_0930.jpk-force	930	1.95312e-07	-1.36719e-06	-7.5034e-09	1.01017e-05	1.76837e-11	-5.20224e-05	-1.5724e-13	-1.78543e-06	9.73456e-12	-1.79044e-06	4.62196e-12	3.72754e-12
map-data-2021.01.25-17.48.04.912_0931.jpk-force	931	2.73438e-07	-1.36719e-06	-7.48838e-09	1.04449e-05	1.67855e-11	-5.43384e-05	-1.32017e-11	-1.09075e-06	1.17563e-11	-1.09642e-06	1.04732e-12	7.81711e-12
map-data-2021.01.25-17.48.04.912_0932.jpk-force	932	3.51562e-07	-1.36719e-06	-7.4913e-09	1.04737e-05	1.24153e-11	-4.97836e-05	-1.00902e-11	-1.09032e-06	1.0743e-11	-1.09633e-06	1.53544e-13	6.03232e-12
map-data-2021.01.25-17.48.04.912_0933.jpk-force	933	4.29686e-07	-1.36719e-06	-7.47654e-09	1.05341e-05	-9.88496e-12	-6.15523e-05	-1.09743e-11	-1.08907e-06	1.37294e-11	-1.0954e-06	1.74721e-12	7.10219e-12
map-data-2021.01.25-17.48.04.912_0934.jpk-force	934	5.07812e-07	-1.36719e-06	-7.49019e-09	1.03621e-05	7.00664e-12	-5.62664e-05	-1.06947e-11	-1.24474e-06	9.27236e-12	-1.24841e-06	-1.65247e-12	5.03075e-12
map-data-2021.01.25-17.48.04.912_0935.jpk-force	935	5.85936e-07	-1.36719e-06	-7.44606e-09	9.68446e-06	1.07679e-11	-4.31802e-05	-4.18061e-11	-1.07401e-06	1.93615e-11	-1.03064e-06	-1.12402e-11	1.40734e-11
map-data-2021.01.25-17.48.04.912_0936.jpk-force	936	6.64062e-07	-1.36719e-06	-7.48571e-09	1.05872e-05	-1.37493e-11	-6.40707e-05	-1.15017e-11	-1.12013e-06	2.54576e-11	-1.07378e-06	6.24162e-12	6.88192e-12
map-data-2021.01.25-17.48.04.912_0937.jpk-force	937	7.42187e-07	-1.36719e-06	-7.49438e-09	1.0403e-05	1.45203e-12	-4.6753e-05	-3.66208e-11	-2.11987e-06	2.11108e-11	-2.08684e-06	-1.50281e-11	1.22007e-11
map-data-2021.01.25-17.48.04.912_0938.jpk-force	938	8.20312e-07	-1.36719e-06	-7.48799e-09	1.03841e-05	2.59052e-12	-4.93532e-05	-9.40788e-12	-1.93817e-06	1.16373e-11	-1.92149e-06	1.48009e-13	5.37097e-12
map-data-2021.01.25-17.48.04.912_0939.jpk-force	939	8.98437e-07	-1.36719e-06	-7.47786e-09	9.23494e-06	4.17705e-11	-2.90969e-05	-4.55601e-11	6.78061e-08	1.96885e-11	8.38128e-08	-1.64358e-11	1.94453e-11
map-data-2021.01.25-17.48.04.912_0940.jpk-force	940	9.76562e-07	-1.36719e-06	-7.49615e-09	1.00945e-05	1.69947e-11	-3.91695e-05	-2.7772e-12	-1.1467e-06	2.65707e-11	-1.13736e-06	1.1559e-11	7.43198e-12
map-data-2021.01.25-17.48.04.912_0941.jpk-force	941	1.05469e-06	-1.36719e-06	-7.50257e-09	1.03977e-05	2.07171e-11	-4.78094e-05	-1.13482e-11	-1.22654e-06	1.76227e-11	-1.23621e-06	4.65053e-13	8.55831e-12
map-data-2021.01.25-17.48.04.912_0942.jpk-force	942	1.13281e-06	-1.36719e-06	-7.52254e-09	1.02389e-05	7.36052e-11	-5.03208e-05	-6.71065e-11	-1.91124e-06	2.53114e-12	-1.77514e-06	-3.37884e-11	1.52492e-11
map-data-2021.01.25-17.48.04.912_0943.jpk-force	943	1.21094e-06	-1.36719e-06	-7.45634e-09	1.01182e-05	1.85411e-11	-5.08475e-05	-1.64976e-11	-1.34059e-06	1.66706e-11	-1.32825e-06	1.25131e-12	8.25821e-12
map-data-2021.01.25-17.48.04.912_0944.jpk-force	944	1.28906e-06	-1.36719e-06	-7.459e-09	1.00613e-05	-5.54288e-12	-7.04702e-05	-1.32989e-11	-1.30518e-06	1.38316e-11	-1.30918e-06	-1.92161e-12	6.2949e-12
map-data-2021.01.25-17.48.04.912_0945.jpk-force	945	1.36719e-06	-1.36719e-06	-7.55757e-09	1.14786e-05	3.88246e-11	-4.40589e-05	-1.23626e-11	-1.31056e-06	1.21448e-11	-1.32223e-06	5.95537e-15	6.54786e-12
map-data-2021.01.25-17.48.04.912_0946.jpk-force	946	1.44531e-06	-1.36719e-06	-7.46421e-09	1.0514e-05	7.3652e-12	-4.47405e-05	-1.54353e-11	-1.29731e-06	1.19644e-11	-1.30264e-06	4.44298e-14	6.11065e-12
map-data-2021.01.25-17.48.04.912_0947.jpk-force	947	1.52344e-06	-1.36719e-06	-7.45423e-09	9.8057e-06	1.01347e-11	-7.20001e-05	-8.82274e-12	-9.22284e-07	1.64196e-11	-9.2662e-07	2.95755e-12	7.09507e-12
map-data-2021.01.25-17.48.04.912_0948.jpk-force	948	1.60156e-06	-1.36719e-06	-7.47187e-09	1.00347e-05	-2.65535e-11	-0.000106319	-4.52996e-12	-9.1115e-07	2.06129e-11	-9.2749e-07	6.28016e-12	6.23891e-12
map-data-2021.01.25-17.48.04.912_0949.jpk-force	949	1.67969e-06	-1.36719e-06	-7.46021e-09	9.97515e-06	1.48952e-10	4.77733e-05	-8.54761e-13	-9.12627e-07	2.60139e-11	-9.26967e-07	1.0422e-11	6.50217e-12
map-data-2021.01.25-17.48.04.912_0950.jpk-force	950	1.75781e-06	-1.36719e-06	-7.46217e-09	9.78818e-06	3.13897e-11	-4.01432e-05	-5.52295e-11	2.50825e-07	1.86977e-11	3.58874e-07	-2.84903e-11	1.93682e-11
map-data-2021.01.25-17.48.04.912_0951.jpk-force	951	1.83594e-06	-1.36719e-06	-7.47336e-09	9.84869e-06	1.87474e-11	-5.6953e-05	-1.18633e-11	2.71278e-07	9.70579e-12	2.79279e-07	-2.42428e-13	5.16904e-12
map-data-2021.01.25-17.48.04.912_0952.jpk-force	952	1.91406e-06	-1.36719e-06	-7.4828e-09	1.06485e-05	1.53019e-11	-3.5913e-05	-1.44885e-11	2.72226e-07	1.51569e-11	2.53554e-07	1.20562e-12	8.04395e-12
map-data-2021.01.25-17.48.04.912_0953.jpk-force	953	1.99219e-06	-1.36719e-06	-7.42448e-09	9.2492e-06	3.09172e-11	-5.74415e-05	-1.20401e-11	-1.33899e-06	2.63511e-11	-1.35801e-06	1.65333e-12	1.00614e-11
map-data-2021.01.25-17.48.04.912_0954.jpk-force	954	2.07031e-06	-1.36719e-06	-7.40667e-09	9.22931e-06	3.32851e-11	-6.07172e-05	-1.23506e-11	-8.44364e-07	1.65503e-11	-8.64048e-07	3.55255e-12	7.82006e-12
map-data-2021.01.25-17.48.04.912_0955.jpk-force	955	2.14844e-06	-1.36719e-06	-7.43547e-09	1.00295e-05	8.18379e-12	-5.06282e-05	-8.2266e-12	-8.71497e-07	1.98785e-11	-8.51155e-07	4.24248e-12	7.34149e-12
map-data-2021.01.25-17.48.04.912_0956.jpk-force	956	2.22656e-06	-1.36719e-06	-7.4236e-09	9.85592e-06	1.2806e-11	-5.75594e-05	-1.20009e-11	-8.43269e-07	2.87102e-11	-8.61276e-07	6.36806e-12	1.05836e-11
map-data-2021.01.25-17.48.04.912_0957.jpk-force	957	2.30469e-06	-1.36719e-06	-7.4112e-09	9.89426e-06	2.29688e-11	-2.76163e-05	-1.78165e-11	-1.28615e-06	2.48441e-11	-1.26814e-06	-8.05646e-14	1.01068e-11
map-data-2021.01.25-17.48.04.912_0958.jpk-force	958	2.38281e-06	-1.36719e-06	-7.44196e-09	1.03618e-05	2.76371e-12	-5.81215e-05	-1.29549e-11	-1.27352e-06	2.51001e-11	-1.23817e-06	1.21694e-12	8.05768e-12
map-data-2021.01.25-17.48.04.912_0959.jpk-force	959	2.46094e-06	-1.36719e-06	-7.41449e-09	1.00145e-05	2.25753e-11	-5.0866e-05	-1.97214e-11	-1.27202e-06	2.02034e-11	-1.26735e-06	4.59236e-13	8.61129e-12
map-data-2021.01.25-17.48.04.912_0960.jpk-force	960	2.46094e-06	-1.28906e-06	-7.45593e-09	9.83486e-06	1.9461e-11	-5.19779e-05	-3.44142e-11	2.09411e-09	2.57372e-11	-9.52858e-08	-3.29583e-12	1.20046e-11
map-data-2021.01.25-17.48.04.912_0961.jpk-force	961	2.38281e-06	-1.28906e-06	-7.47152e-09	1.11024e-05	8.39035e-12	-4.84035e-05	-1.69337e-11	-1.29844e-06	1.78935e-11	-1.31444e-06	-1.42016e-12	1.0827e-11
map-data-2021.01.25-17.48.04.912_0962.jpk-force	962	2.30469e-06	-1.28906e-06	-7.43667e-09	9.69622e-06	1.78417e-11	-4.56646e-05	-1.00335e-11	-1.31157e-06	2.18418e-11	-1.30623e-06	6.37676e-12	8.70892e-12
map-data-2021.01.25-17.48.04.912_0963.jpk-force	963	2.22656e-06	-1.28906e-06	-7.45839e-09	1.01044e-05	1.69677e-11	-4.75874e-05	-1.00654e-11	-1.32225e-06	1.19798e-11	-1.30424e-06	9.35646e-13	6.34424e-12
map-data-2021.01.25-17.48.04.912_0964.jpk-force	964	2.14844e-06	-1.28906e-06	-7.51984e-09	1.00523e-05	2.24767e-11	-7.12708e-05	-6.45378e-12	-1.33619e-06	1.62169e-11	-1.32885e-06	3.09921e-12	5.46818e-12
map-data-2021.01.25-17.48.04.912_0965.jpk-force	965	2.07031e-06	-1.28906e-06	-7.50182e-09	1.02584e-05	1.18726e-11	-6.7307e-05	-4.80053e-12	-1.34941e-06	2.65259e-11	-1.33006e-06	7.83401e-12	7.40738e-12
map-data-2021.01.25-17.48.04.912_0966.jpk-force	966	1.99219e-06	-1.28906e-06	-7.45621e-09	1.03686e-05	1.44833e-11	-5.13014e-05	-7.0536e-11	-2.47888e-06	2.12506e-11	-2.67078e-06	-1.23893e-11	1.81966e-11
map-data-2021.01.25-17.48.04.912_0967.jpk-force	967	1.91406e-06	-1.28906e-06	-7.46342e-09	1.06316e-05	-1.17991e-11	-7.72697e-05	-1.50226e-11	-1.15778e-06	9.23335e-12	-1.16179e-06	-1.07861e-12	6.55791e-12
map-data-2021.01.25-17.48.04.912_0968.jpk-force	968	1.83594e-06	-1.28906e-06	-7.4435e-09	9.91443e-06	2.7756e-11	-5.49701e-05	-1.72863e-11	-1.14316e-06	1.96244e-11	-1.14716e-06	8.97027e-13	7.87831e-12
map-data-2021.01.25-17.48.04.912_0969.jpk-force	969	1.75781e-06	-1.28906e-06	-7.47715e-09	1.05862e-05	2.13581e-12	-4.48509e-05	-1.71346e-11	-1.15878e-06	2.09019e-11	-1.1411e-06	3.50431e-13	8.78145e-12
map-data-2021.01.25-17.48.04.912_0970.jpk-force	970	1.67969e-06	-1.28906e-06	-7.43924e-09	1.00006e-05	2.11608e-11	-4.29134e-05	-7.91052e-12	-1.1293e-06	1.87933e-11	-1.13296e-06	3.32528e-12	7.45653e-12
map-data-2021.01.25-17.48.04.912_0971.jpk-force	971	1.60156e-06	-1.28906e-06	-7.44662e-09	1.00551e-05	1.67161e-11	-4.20862e-05	-1.41989e-11	-1.15305e-06	1.15269e-11	-1.13304e-06	9.45579e-13	6.20032e-12
map-data-2021.01.25-17.48.04.912_0972.jpk-force	972	1.52344e-06	-1.28906e-06	-7.4626e-09	1.05248e-05	2.63333e-11	-1.89956e-05	-1.25009e-11	-1.16159e-06	1.77797e-11	-1.14625e-06	1.06057e-12	7.79654e-12
map-data-2021.01.25-17.48.04.912_0973.jpk-force	973	1.44531e-06	-1.28906e-06	-7.53215e-09	1.01437e-05	-5.34741e-11	-8.34047e-05	-3.49094e-11	-2.50669e-06	2.64545e-11	-2.37053e-06	-5.37819e-12	1.35221e-11
map-data-2021.01.25-17.48.04.912_0974.jpk-force	974	1.36719e-06	-1.28906e-06	-7.46888e-09	9.57715e-06	2.93587e-11	-4.54191e-05	-7.37079e-12	-1.3767e-06	1.26364e-11	-1.36802e-06	2.72352e-12	5.64611e-12
map-data-2021.01.25-17.48.04.912_0975.jpk-force	975	1.28906e-06	-1.28906e-06	-7.49535e-09	9.91499e-06	2.65693e-12	-6.75083e-05	-1.43084e-11	-1.37663e-06	1.89848e-11	-1.36996e-06	7.36816e-12	9.39569e-12
map-data-2021.01.25-17.48.04.912_0976.jpk-force	976	1.21094e-06	-1.28906e-06	-7.45415e-09	1.06191e-05	1.3649e-11	-5.26393e-05	-7.80515e-12	-1.37686e-06	1.19219e-11	-1.36852e-06	5.13014e-12	5.49986e-12
map-data-2021.01.25-17.48.04.912_0977.jpk-force	977	1.13281e-06	-1.28906e-06	-7.45479e-09	9.91772e-06	-1.47098e-12	-6.05618e-05	-5.9611e-12	-1.37462e-06	1.6982e-11	-1.36928e-06	3.47566e-12	8.02402e-12
map-data-2021.01.25-17.48.04.912_0978.jpk-force	978	1.05469e-06	-1.28906e-06	-7.43895e-09	1.0091e-05	1.29959e-11	-5.00774e-05	-7.21134e-11	-1.24749e-06	1.30718e-11	-1.13877e-06	-3.34433e-11	2.50309e-11
map-data-2021.01.25-17.48.04.912_0979.jpk-force	979	9.76563e-07	-1.28906e-06	-7.49713e-09	9.76257e-06	1.5933e-11	-4.36844e-05	-3.19149e-11	-8.18467e-07	2.35258e-11	-7.44769e-07	-5.35405e-12	1.20537e-11
map-data-2021.01.25-17.48.04.912_0980.jpk-force	980	8.98437e-07	-1.28906e-06	-7.47809e-09	9.85475e-06	1.37219e-11	-5.30527e-05	-9.9192e-12	-3.62454e-07	1.75176e-11	-3.28105e-07	6.82017e-13	5.60737e-12
map-data-2021.01.25-17.48.04.912_0981.jpk-force	981	8.20312e-07	-1.28906e-06	-7.4709e-09	9.88646e-06	8.36438e-12	-5.25722e-05	-5.41999e-11	-2.18165e-06	1.48868e-11	-2.12458e-06	-1.79664e-11	1.44017e-11
map-data-2021.01.25-17.48.04.912_0982.jpk-force	982	7.42187e-07	-1.28906e-06	-7.51054e-09	9.89684e-06	1.02428e-11	-6.2947e-05	-1.32308e-11	-8.42784e-07	2.36663e-11	-8.62126e-07	3.30524e-12	8.74745e-12
map-data-2021.01.25-17.48.04.912_0983.jpk-force	983	6.64062e-07	-1.28906e-06	-7.55234e-09	1.1168e-05	4.74397e-11	-3.54627e-05	-1.3306e-11	-8.40764e-07	1.78091e-11	-8.35095e-07	2.00322e-12	8.17617e-12
map-data-2021.01.25-17.48.04.912_0984.jpk-force	984	5.85938e-07	-1.28906e-06	-7.47774e-09	9.50286e-06	3.96514e-11	-3.35828e-05	-1.38829e-11	1.00231e-06	1.44655e-11	9.91636e-07	1.94883e-12	6.63092e-12
map-data-2021.01.25-17.48.04.912_0985.jpk-force	985	5.07813e-07	-1.28906e-06	-7.45832e-09	1.00083e-05	1.73741e-11	-4.71627e-05	-1.58989e-11	-5.22245e-08	1.52619e-11	-5.68933e-08	1.68048e-13	6.62798e-12
map-data-2021.01.25-17.48.04.912_0986.jpk-force	986	4.29687e-07	-1.28906e-06	-7.47139e-09	1.00995e-05	1.74389e-11	-5.45201e-05	-1.30504e-11	-2.76173e-08	1.70117e-11	-3.32865e-08	-9.17067e-13	6.65698e-12
map-data-2021.01.25-17.48.04.912_0987.jpk-force	987	3.51563e-07	-1.28906e-06	-7.47796e-09	9.92256e-06	-2.66601e-11	-6.745e-05	-5.05485e-11	-2.49334e-06	2.09885e-11	-2.38354e-06	-9.23489e-12	1.76548e-11
map-data-2021.01.25-17.48.04.912_0988.jpk-force	988	2.73438e-07	-1.28906e-06	-7.50769e-09	9.88529e-06	9.93266e-12	-5.22333e-05	-1.50094e-11	-1.70289e-06	1.31265e-11	-1.7209e-06	-3.50556e-12	6.67801e-12
map-data-2021.01.25-17.48.04.912_0989.jpk-force	989	1.95312e-07	-1.28906e-06	-7.45848e-09	9.83997e-06	1.622e-11	-5.10717e-05	-1.167e-11	-1.71329e-06	1.31512e-11	-1.71829e-06	4.2766e-13	6.21763e-12
map-data-2021.01.25-17.48.04.912_0990.jpk-force	990	1.17187e-07	-1.28906e-06	-7.44976e-09	1.00994e-05	2.48382e-12	-5.35877e-05	-1.49769e-11	-1.146e-06	1.61911e-11	-1.164e-06	2.1537e-12	6.4661e-12
map-data-2021.01.25-17.48.04.912_0991.jpk-force	991	3.90618e-08	-1.28906e-06	-7.49873e-09	1.00489e-05	1.91567e-11	-5.23961e-05	-1.39539e-11	-1.76522e-06	2.5124e-11	-1.76989e-06	5.63935e-12	1.19242e-11
map-data-2021.01.25-17.48.04.912_0992.jpk-force	992	-3.90623e-08	-1.28906e-06	-7.51888e-09	1.06582e-05	1.05792e-11	-6.1617e-05	-5.89571e-12	-1.57298e-06	2.31312e-11	-1.55264e-06	2.32571e-12	6.5625e-12
map-data-2021.01.25-17.48.04.912_0993.jpk-force	993	-1.17187e-07	-1.28906e-06	-7.51751e-09	9.87163e-06	-3.86924e-11	-9.32402e-05	-1.22243e-11	-1.8418e-06	2.23023e-11	-1.83747e-06	5.7189e-12	7.24836e-12
map-data-2021.01.25-17.48.04.912_0994.jpk-force	994	-1.95313e-07	-1.28906e-06	-7.4795e-09	1.04124e-05	-1.13669e-11	-6.56509e-05	-8.63799e-12	-2.19611e-06	7.94125e-12	-2.19344e-06	-3.64566e-13	4.36542e-12
map-data-2021.01.25-17.48.04.912_0995.jpk-force	995	-2.73438e-07	-1.28906e-06	-7.47071e-09	9.93304e-06	1.32294e-11	-5.10826e-05	-1.40753e-11	-1.15849e-06	2.13308e-12	-1.15416e-06	-4.35949e-12	3.60229e-12
map-data-2021.01.25-17.48.04.912_0996.jpk-force	996	-3.51563e-07	-1.28906e-06	-7.49871e-09	9.99058e-06	5.61663e-11	-4.67925e-05	-1.22993e-11	-1.1417e-06	7.08369e-12	-1.1457e-06	-2.46906e-12	5.56214e-12
map-data-2021.01.25-17.48.04.912_0997.jpk-force	997	-4.29688e-07	-1.28906e-06	-7.49329e-09	1.07248e-05	-7.90906e-13	-5.84315e-05	-9.40832e-12	-1.14177e-06	9.01997e-12	-1.15211e-06	1.34015e-12	4.62832e-12
map-data-2021.01.25-17.48.04.912_0998.jpk-force	998	-5.07813e-07	-1.28906e-06	-7.50129e-09	9.97642e-06	4.35788e-11	-5.44979e-05	-5.02134e-12	-1.15117e-06	1.84242e-11	-1.14417e-06	4.70541e-12	5.65047e-12
map-data-2021.01.25-17.48.04.912_0999.jpk-force	999	-5.85938e-07	-1.28906e-06	-7.47665e-09	1.03838e-05	2.00655e-11	-4.6042e-05	-7.38736e-12	-1.15673e-06	8.64347e-12	-1.14906e-06	-5.06242e-14	4.50546e-12
map-data-2021.01.25-17.48.04.912_1000.jpk-force	1000	-6.64063e-07	-1.28906e-06	-7.43253e-09	1.00854e-05	-7.53005e-12	-5.6502e-05	-5.28206e-11	-2.27373e-06	2.18015e-11	-2.21533e-06	-1.58128e-11	1.69058e-11
map-data-2021.01.25-17.48.04.912_1001.jpk-force	1001	-7.42187e-07	-1.28906e-06	-7.45496e-09	9.94246e-06	3.50997e-11	-3.91848e-05	-1.46671e-11	-2.20533e-06	3.17306e-11	-2.2367e-06	1.02626e-11	9.23445e-12
map-data-2021.01.25-17.48.04.912_1002.jpk-force	1002	-8.20313e-07	-1.28906e-06	-7.47596e-09	1.01512e-05	-2.58395e-11	-7.24518e-05	-5.33323e-11	-2.63861e-06	2.08774e-11	-2.56619e-06	-2.15958e-11	1.77128e-11
map-data-2021.01.25-17.48.04.912_1003.jpk-force	1003	-8.98437e-07	-1.28906e-06	-7.46981e-09	1.00031e-05	1.65692e-11	-4.79958e-05	-1.13616e-11	-8.80869e-07	1.50243e-11	-8.74199e-07	-3.0229e-13	7.2514e-12
map-data-2021.01.25-17.48.04.912_1004.jpk-force	1004	-9.76563e-07	-1.28906e-06	-7.48054e-09	1.01713e-05	2.76982e-11	-2.59837e-05	-1.89884e-11	-8.7393e-07	1.71958e-11	-8.78599e-07	1.67664e-12	1.15082e-11
map-data-2021.01.25-17.48.04.912_1005.jpk-force	1005	-1.05469e-06	-1.28906e-06	-7.48096e-09	9.98605e-06	3.88253e-12	-6.22855e-05	-1.37626e-11	-8.86814e-07	1.05909e-11	-8.90483e-07	-6.40169e-12	5.27038e-12
map-data-2021.01.25-17.48.04.912_1006.jpk-force	1006	-1.13281e-06	-1.28906e-06	-7.55758e-09	9.67085e-06	3.16562e-11	-5.18859e-05	-1.3575e-11	-1.06831e-06	1.75347e-11	-1.09766e-06	1.56353e-12	7.76703e-12
map-data-2021.01.25-17.48.04.912_1007.jpk-force	1007	-1.21094e-06	-1.28906e-06	-7.50862e-09	9.83892e-06	-1.08763e-11	-4.53744e-05	-1.09633e-11	-1.27127e-06	2.12157e-11	-1.27727e-06	2.57346e-12	9.04371e-12
map-data-2021.01.25-17.48.04.912_1008.jpk-force	1008	-1.28906e-06	-1.28906e-06	-7.4622e-09	9.56489e-06	1.61905e-11	-5.2931e-05	-1.25517e-11	-1.29032e-06	1.53839e-11	-1.28332e-06	-2.147e-13	6.6566e-12
map-data-2021.01.25-17.48.04.912_1009.jpk-force	1009	-1.36719e-06	-1.28906e-06	-7.46378e-09	9.86038e-06	2.91157e-12	-5.39725e-05	-1.2702e-11	-1.27286e-06	1.40074e-11	-1.2902e-06	3.10828e-12	7.73557e-12
map-data-2021.01.25-17.48.04.912_1010.jpk-force	1010	-1.44531e-06	-1.28906e-06	-7.46137e-09	1.01051e-05	1.62799e-11	-4.89079e-05	-3.68328e-12	-1.03885e-06	2.14406e-11	-1.04319e-06	4.81641e-12	6.94229e-12
map-data-2021.01.25-17.48.04.912_1011.jpk-force	1011	-1.52344e-06	-1.28906e-06	-7.49225e-09	9.93656e-06	5.49913e-12	-6.11249e-05	-4.79271e-11	-2.34176e-06	1.95219e-11	-2.269e-06	-1.30421e-11	1.59281e-11
map-data-2021.01.25-17.48.04.912_1012.jpk-force	1012	-1.60156e-06	-1.28906e-06	-7.48884e-09	9.83499e-06	3.39826e-12	-5.83857e-05	-3.73547e-12	-1.82917e-06	1.7728e-11	-1.8265e-06	9.278e-12	5.59592e-12
map-data-2021.01.25-17.48.04.912_1013.jpk-force	1013	-1.67969e-06	-1.28906e-06	-7.49231e-09	1.00889e-05	-9.18216e-11	-8.69678e-05	-6.16695e-11	-2.89344e-06	2.6692e-11	-2.83738e-06	-1.92375e-11	2.20303e-11
map-data-2021.01.25-17.48.04.912_1014.jpk-force	1014	-1.75781e-06	-1.28906e-06	-7.50261e-09	9.92552e-06	8.24584e-12	-5.73877e-05	-7.03491e-11	-2.34049e-06	2.06062e-11	-2.27975e-06	-2.45046e-11	2.66021e-11
map-data-2021.01.25-17.48.04.912_1015.jpk-force	1015	-1.83594e-06	-1.28906e-06	-7.51533e-09	1.01913e-05	-8.21438e-12	-6.65343e-05	-1.44013e-11	-1.54701e-06	2.18068e-11	-1.56502e-06	6.69824e-13	8.52469e-12
map-data-2021.01.25-17.48.04.912_1016.jpk-force	1016	-1.91406e-06	-1.28906e-06	-7.55029e-09	1.01161e-05	1.47894e-11	-5.81529e-05	-4.45061e-11	-1.74097e-06	2.61419e-11	-1.70995e-06	-7.94738e-12	1.60556e-11
map-data-2021.01.25-17.48.04.912_1017.jpk-force	1017	-1.99219e-06	-1.28906e-06	-7.55875e-09	1.12924e-05	1.42657e-11	-5.48074e-05	-1.08727e-11	-1.46913e-06	1.78783e-11	-1.48681e-06	7.78536e-13	6.55741e-12
map-data-2021.01.25-17.48.04.912_1018.jpk-force	1018	-2.07031e-06	-1.28906e-06	-7.56583e-09	9.94025e-06	1.21399e-11	-6.72636e-05	-7.70903e-12	-1.41705e-06	3.25345e-11	-1.50044e-06	1.33354e-11	8.63883e-12
map-data-2021.01.25-17.48.04.912_1019.jpk-force	1019	-2.14844e-06	-1.28906e-06	-7.52298e-09	9.78207e-06	6.98059e-12	-3.01766e-05	-1.41718e-11	-1.44008e-06	1.70428e-11	-1.52714e-06	-9.38385e-13	7.33787e-12
map-data-2021.01.25-17.48.04.912_1020.jpk-force	1020	-2.22656e-06	-1.28906e-06	-7.51477e-09	1.01651e-05	-8.52571e-12	-5.9365e-05	-4.91462e-11	-2.14427e-06	1.75322e-11	-2.12592e-06	-1.97415e-11	1.29505e-11
map-data-2021.01.25-17.48.04.912_1021.jpk-force	1021	-2.30469e-06	-1.28906e-06	-7.50831e-09	1.0059e-05	1.12815e-11	-4.93797e-05	-4.50275e-11	-1.91051e-06	2.2633e-11	-1.74569e-06	-1.07444e-11	1.46939e-11
map-data-2021.01.25-17.48.04.912_1022.jpk-force	1022	-2.38281e-06	-1.28906e-06	-7.51106e-09	1.00816e-05	1.38106e-11	-3.77883e-05	-8.25188e-12	-1.71824e-06	3.78019e-11	-1.8824e-06	1.31811e-11	9.00746e-12
map-data-2021.01.25-17.48.04.912_1023.jpk-force	1023	-2.46094e-06	-1.28906e-06	-7.50046e-09	9.70915e-06	2.93055e-11	-3.49566e-05	-4.18063e-11	-1.30924e-06	2.58579e-11	-1.26688e-06	-1.55907e-11	1.65843e-11
map-data-2021.01.25-17.48.04.912_1024.jpk-force	1024	-2.46094e-06	-1.21094e-06	-7.5058e-09	1.01015e-05	1.18293e-11	-5.0931e-05	-1.06955e-11	-1.08045e-06	1.44318e-11	-1.08412e-06	-1.72809e-13	6.84804e-12
map-data-2021.01.25-17.48.04.912_1025.jpk-force	1025	-2.38281e-06	-1.21094e-06	-7.50778e-09	1.01611e-05	2.01044e-11	-3.9484e-05	-4.61418e-11	-2.13836e-06	1.3267e-11	-2.03959e-06	-1.99504e-11	1.16835e-11
map-data-2021.01.25-17.48.04.912_1026.jpk-force	1026	-2.30469e-06	-1.21094e-06	-7.50285e-09	1.00325e-05	1.14959e-11	-5.27268e-05	-1.59219e-11	-1.00139e-06	1.50625e-11	-1.05642e-06	3.51524e-13	7.83234e-12
map-data-2021.01.25-17.48.04.912_1027.jpk-force	1027	-2.22656e-06	-1.21094e-06	-7.50253e-09	9.94075e-06	2.33204e-11	-4.54062e-05	-9.60574e-12	-1.16502e-06	2.03996e-11	-1.12433e-06	3.61266e-12	7.42064e-12
map-data-2021.01.25-17.48.04.912_1028.jpk-force	1028	-2.14844e-06	-1.21094e-06	-7.51439e-09	1.00317e-05	1.19684e-11	-5.20435e-05	-1.61252e-11	-1.67922e-06	1.68289e-11	-1.67388e-06	-2.36922e-12	7.64552e-12
map-data-2021.01.25-17.48.04.912_1029.jpk-force	1029	-2.07031e-06	-1.21094e-06	-7.50437e-09	1.01074e-05	1.38865e-11	-4.39298e-05	-6.15271e-12	-1.59754e-06	2.02203e-11	-1.57886e-06	3.60768e-12	5.95355e-12
map-data-2021.01.25-17.48.04.912_1030.jpk-force	1030	-1.99219e-06	-1.21094e-06	-7.48976e-09	9.90317e-06	-2.15925e-11	-6.61859e-05	-4.76957e-11	-2.5318e-06	1.91708e-11	-2.36827e-06	-1.34133e-11	1.55348e-11
map-data-2021.01.25-17.48.04.912_1031.jpk-force	1031	-1.91406e-06	-1.21094e-06	-7.51875e-09	1.02313e-05	1.25506e-11	-5.53764e-05	-1.12065e-11	-2.44107e-06	2.96477e-11	-2.55153e-06	8.1096e-12	8.56333e-12
map-data-2021.01.25-17.48.04.912_1032.jpk-force	1032	-1.83594e-06	-1.21094e-06	-7.55189e-09	1.00839e-05	1.32722e-11	-7.30242e-05	-1.20775e-11	-1.32692e-06	1.79198e-11	-1.31725e-06	6.02509e-12	7.30169e-12
map-data-2021.01.25-17.48.04.912_1033.jpk-force	1033	-1.75781e-06	-1.21094e-06	-7.54917e-09	1.02483e-05	1.21564e-11	-5.07031e-05	-2.73854e-12	-1.3138e-06	1.68174e-11	-1.30646e-06	6.52426e-12	5.16125e-12
map-data-2021.01.25-17.48.04.912_1034.jpk-force	1034	-1.67969e-06	-1.21094e-06	-7.50296e-09	9.73811e-06	-4.4503e-11	-7.84843e-05	-6.75625e-11	-2.40915e-06	1.90157e-11	-2.33807e-06	-2.17836e-11	1.93745e-11
map-data-2021.01.25-17.48.04.912_1035.jpk-force	1035	-1.60156e-06	-1.21094e-06	-7.46012e-09	9.81419e-06	-7.435e-12	-6.74461e-05	-1.5952e-11	-2.16956e-06	1.13926e-11	-2.1472e-06	-9.82917e-13	6.42359e-12
map-data-2021.01.25-17.48.04.912_1036.jpk-force	1036	-1.52344e-06	-1.21094e-06	-7.52683e-09	1.04166e-05	-1.20605e-11	-7.22791e-05	-3.16981e-11	-2.43187e-06	2.47158e-12	-2.44922e-06	-1.51039e-11	9.06503e-12
map-data-2021.01.25-17.48.04.912_1037.jpk-force	1037	-1.44531e-06	-1.21094e-06	-7.5116e-09	1.00182e-05	-8.86856e-11	-9.48029e-05	-6.10951e-11	-2.6219e-06	2.26001e-11	-2.57785e-06	-2.36346e-11	1.804e-11
map-data-2021.01.25-17.48.04.912_1038.jpk-force	1038	-1.36719e-06	-1.21094e-06	-7.52488e-09	9.81627e-06	1.96455e-11	-5.17587e-05	-1.35202e-11	-2.62373e-06	3.47823e-11	-2.61939e-06	1.24352e-11	9.42817e-12
map-data-2021.01.25-17.48.04.912_1039.jpk-force	1039	-1.28906e-06	-1.21094e-06	-7.49174e-09	9.91279e-06	-3.45513e-11	-7.35333e-05	-1.63605e-11	-2.59224e-06	2.5123e-11	-2.63195e-06	-2.09769e-14	8.86205e-12
map-data-2021.01.25-17.48.04.912_1040.jpk-force	1040	-1.21094e-06	-1.21094e-06	-7.48555e-09	9.98549e-06	1.51813e-12	-5.38707e-05	-6.15255e-12	-1.62302e-06	2.51602e-11	-1.63103e-06	9.50318e-12	1.03656e-11
map-data-2021.01.25-17.48.04.912_1041.jpk-force	1041	-1.13281e-06	-1.21094e-06	-7.50376e-09	1.02826e-05	-5.78518e-11	-8.49745e-05	-3.48029e-11	-2.75297e-06	2.43136e-11	-2.72093e-06	-7.2999e-13	1.07076e-11
map-data-2021.01.25-17.48.04.912_1042.jpk-force	1042	-1.05469e-06	-1.21094e-06	-7.49477e-09	1.02434e-05	-5.84236e-12	-5.75898e-05	-1.32266e-11	-2.31025e-06	2.34948e-11	-2.29123e-06	2.95042e-12	8.65926e-12
map-data-2021.01.25-17.48.04.912_1043.jpk-force	1043	-9.76563e-07	-1.21094e-06	-7.50755e-09	1.0234e-05	-2.93015e-13	-6.22162e-05	-1.02696e-11	-1.29594e-06	1.66884e-11	-1.2906e-06	1.62039e-12	7.0548e-12
map-data-2021.01.25-17.48.04.912_1044.jpk-force	1044	-8.98437e-07	-1.21094e-06	-7.53858e-09	1.09455e-05	-3.14528e-11	-7.50315e-05	-4.71065e-12	-1.28689e-06	3.43416e-11	-1.26655e-06	1.55786e-11	9.16597e-12
map-data-2021.01.25-17.48.04.912_1045.jpk-force	1045	-8.20313e-07	-1.21094e-06	-7.5151e-09	1.01741e-05	-1.88816e-12	-6.78138e-05	-1.30924e-11	-1.28482e-06	2.42693e-11	-1.26914e-06	6.64271e-12	8.64164e-12
map-data-2021.01.25-17.48.04.912_1046.jpk-force	1046	-7.42187e-07	-1.21094e-06	-7.5536e-09	1.10288e-05	1.28815e-11	-6.40244e-05	-3.21533e-11	-3.75593e-07	1.75406e-11	-2.65875e-07	-1.21396e-11	1.10431e-11
map-data-2021.01.25-17.48.04.912_1047.jpk-force	1047	-6.64063e-07	-1.21094e-06	-7.52838e-09	1.07858e-05	1.33568e-11	-2.28057e-05	-1.49526e-11	-3.38314e-07	2.21546e-11	-2.81621e-07	5.03927e-12	7.24724e-12
map-data-2021.01.25-17.48.04.912_1048.jpk-force	1048	-5.85938e-07	-1.21094e-06	-7.5334e-09	1.02895e-05	1.80739e-11	-4.07564e-05	-7.33193e-12	-2.72396e-07	3.21924e-11	-2.53053e-07	1.24243e-11	7.86049e-12
map-data-2021.01.25-17.48.04.912_1049.jpk-force	1049	-5.07813e-07	-1.21094e-06	-7.50828e-09	1.01714e-05	1.9327e-11	-4.16756e-05	-1.71097e-11	-3.51903e-07	2.41569e-11	-3.19888e-07	3.06936e-12	7.95231e-12
map-data-2021.01.25-17.48.04.912_1050.jpk-force	1050	-4.29688e-07	-1.21094e-06	-7.56848e-09	1.02533e-05	1.31011e-11	-3.95009e-05	-1.82381e-11	-3.37918e-07	3.23473e-11	-3.5626e-07	6.02739e-12	9.30279e-12
map-data-2021.01.25-17.48.04.912_1051.jpk-force	1051	-3.51563e-07	-1.21094e-06	-7.51733e-09	1.07095e-05	1.65057e-11	-4.83026e-05	-6.77415e-12	-1.95961e-07	1.67427e-11	-1.98629e-07	7.24112e-12	8.61566e-12
map-data-2021.01.25-17.48.04.912_1052.jpk-force	1052	-2.73438e-07	-1.21094e-06	-7.4659e-09	1.04535e-05	1.93429e-11	-7.8165e-05	-1.4483e-12	-1.98367e-07	7.03332e-12	-1.99034e-07	7.0391e-13	2.43637e-12
map-data-2021.01.25-17.48.04.912_1053.jpk-force	1053	-1.95313e-07	-1.21094e-06	-7.46147e-09	1.01956e-05	2.33022e-11	-4.78976e-05	-1.72883e-11	-1.20574e-06	1.87159e-11	-1.23775e-06	1.18801e-12	8.56177e-12
map-data-2021.01.25-17.48.04.912_1054.jpk-force	1054	-1.17188e-07	-1.21094e-06	-7.48446e-09	1.01558e-05	2.0751e-11	-5.01908e-05	-1.26322e-11	-1.23352e-06	2.10117e-11	-1.25287e-06	-2.19308e-13	7.23084e-12
map-data-2021.01.25-17.48.04.912_1055.jpk-force	1055	-3.90635e-08	-1.21094e-06	-7.49112e-09	1.02302e-05	6.23209e-12	-5.29023e-05	-1.68472e-11	-1.30875e-06	1.9173e-11	-1.38112e-06	7.34692e-13	7.54636e-12
map-data-2021.01.25-17.48.04.912_1056.jpk-force	1056	3.90618e-08	-1.21094e-06	-7.4992e-09	9.94503e-06	1.6612e-11	-5.18145e-05	-3.74857e-11	-1.96082e-06	1.84053e-11	-1.92812e-06	-3.33501e-12	1.01479e-11
map-data-2021.01.25-17.48.04.912_1057.jpk-force	1057	1.17188e-07	-1.21094e-06	-7.49934e-09	1.00156e-05	2.26735e-11	-4.44596e-05	-6.2013e-11	-2.23939e-06	1.18281e-11	-2.17731e-06	-2.65635e-11	1.68992e-11
map-data-2021.01.25-17.48.04.912_1058.jpk-force	1058	1.95312e-07	-1.21094e-06	-7.45644e-09	9.58802e-06	1.20763e-11	-6.2091e-05	-1.23795e-11	-2.1941e-06	9.25798e-11	-2.40862e-06	2.64327e-11	1.84465e-11
map-data-2021.01.25-17.48.04.912_1059.jpk-force	1059	2.73438e-07	-1.21094e-06	-7.45779e-09	1.02523e-05	5.15835e-12	-4.60829e-05	-1.53569e-11	-1.82864e-06	2.64562e-11	-1.82363e-06	4.65686e-13	7.88113e-12
map-data-2021.01.25-17.48.04.912_1060.jpk-force	1060	3.51562e-07	-1.21094e-06	-7.47802e-09	1.00707e-05	8.75946e-12	-5.42784e-05	-1.62835e-11	-1.82173e-06	2.38415e-11	-1.8264e-06	5.41255e-12	9.43726e-12
map-data-2021.01.25-17.48.04.912_1061.jpk-force	1061	4.29686e-07	-1.21094e-06	-7.46897e-09	1.00114e-05	1.47094e-11	-5.38304e-05	-6.04361e-11	-2.42635e-06	2.2185e-11	-2.34825e-06	-1.84642e-11	1.93123e-11
map-data-2021.01.25-17.48.04.912_1062.jpk-force	1062	5.07812e-07	-1.21094e-06	-7.46307e-09	1.008e-05	1.01767e-11	-5.57231e-05	-8.98477e-12	-1.40429e-06	1.97648e-11	-1.38461e-06	4.70997e-12	7.96266e-12
map-data-2021.01.25-17.48.04.912_1063.jpk-force	1063	5.85936e-07	-1.21094e-06	-7.46457e-09	1.01793e-05	1.80767e-11	-5.18483e-05	-1.05747e-11	-9.59013e-07	1.12315e-11	-9.64682e-07	2.04521e-12	6.8764e-12
map-data-2021.01.25-17.48.04.912_1064.jpk-force	1064	6.64062e-07	-1.21094e-06	-7.47413e-09	1.01487e-05	-1.88511e-11	-7.47981e-05	-3.34772e-11	-2.62383e-06	1.76912e-11	-2.55242e-06	-6.82889e-12	1.20713e-11
map-data-2021.01.25-17.48.04.912_1065.jpk-force	1065	7.42187e-07	-1.21094e-06	-7.47685e-09	1.0349e-05	1.23614e-11	-4.40854e-05	-1.80567e-11	-1.27205e-06	1.80222e-11	-1.29039e-06	-2.06911e-12	6.47493e-12
map-data-2021.01.25-17.48.04.912_1066.jpk-force	1066	8.20312e-07	-1.21094e-06	-7.47653e-09	1.0426e-05	1.60065e-12	-5.12453e-05	-1.47281e-11	-1.24808e-06	1.66947e-11	-1.29043e-06	1.31533e-12	7.46429e-12
map-data-2021.01.25-17.48.04.912_1067.jpk-force	1067	8.98437e-07	-1.21094e-06	-7.4829e-09	1.03685e-05	1.12775e-11	-4.65426e-05	-5.49921e-11	-1.87093e-06	2.30944e-11	-1.67111e-06	-1.18568e-11	2.12436e-11
map-data-2021.01.25-17.48.04.912_1068.jpk-force	1068	9.76562e-07	-1.21094e-06	-7.43746e-09	1.04247e-05	1.74319e-11	-3.72976e-05	-1.91285e-11	-1.14434e-06	1.4069e-11	-1.14934e-06	-9.43557e-13	8.17237e-12
map-data-2021.01.25-17.48.04.912_1069.jpk-force	1069	1.05469e-06	-1.21094e-06	-7.4554e-09	1.03483e-05	4.70109e-12	-6.45054e-05	-6.42024e-11	-2.54718e-06	1.35895e-11	-2.34626e-06	-2.64643e-11	1.93476e-11
map-data-2021.01.25-17.48.04.912_1070.jpk-force	1070	1.13281e-06	-1.21094e-06	-7.49386e-09	1.02771e-05	1.4818e-11	-5.37754e-05	-5.03805e-11	-1.0116e-06	2.05619e-11	-8.49532e-07	-1.96118e-11	1.84884e-11
map-data-2021.01.25-17.48.04.912_1071.jpk-force	1071	1.21094e-06	-1.21094e-06	-7.46513e-09	1.01915e-05	6.74167e-11	-6.16188e-06	-4.01761e-11	-1.65357e-06	2.31143e-11	-1.60487e-06	-1.11765e-11	1.64166e-11
map-data-2021.01.25-17.48.04.912_1072.jpk-force	1072	1.28906e-06	-1.21094e-06	-7.44121e-09	1.00593e-05	8.73605e-12	-5.29144e-05	-1.34736e-11	-1.63815e-06	1.63932e-11	-1.65583e-06	1.8853e-12	6.57612e-12
map-data-2021.01.25-17.48.04.912_1073.jpk-force	1073	1.36719e-06	-1.21094e-06	-7.46138e-09	1.01005e-05	6.69801e-12	-6.7805e-05	-6.83631e-11	-1.74286e-06	7.70858e-12	-1.71817e-06	-2.82592e-11	1.62742e-11
map-data-2021.01.25-17.48.04.912_1074.jpk-force	1074	1.44531e-06	-1.21094e-06	-7.46253e-09	1.02301e-05	7.61149e-12	-5.2132e-05	-1.03876e-11	-1.69582e-06	6.13892e-12	-1.69249e-06	-2.68831e-12	4.62274e-12
map-data-2021.01.25-17.48.04.912_1075.jpk-force	1075	1.52344e-06	-1.21094e-06	-7.45126e-09	8.86308e-06	5.09837e-11	-5.79302e-05	-1.39864e-11	-4.00699e-07	2.35862e-11	-4.72757e-07	5.17963e-12	8.3419e-12
map-data-2021.01.25-17.48.04.912_1076.jpk-force	1076	1.60156e-06	-1.21094e-06	-7.47e-09	1.02513e-05	2.09963e-11	-5.59389e-05	-8.53461e-12	-5.29998e-07	6.93683e-12	-5.17659e-07	-1.80268e-12	4.13567e-12
map-data-2021.01.25-17.48.04.912_1077.jpk-force	1077	1.67969e-06	-1.21094e-06	-7.46538e-09	1.01665e-05	5.10832e-13	-6.16543e-05	-1.96e-12	-5.28607e-07	1.76571e-11	-5.19269e-07	7.84181e-12	5.44879e-12
map-data-2021.01.25-17.48.04.912_1078.jpk-force	1078	1.75781e-06	-1.21094e-06	-7.4496e-09	1.01121e-05	1.1655e-12	-5.43502e-05	-1.09481e-11	-5.30912e-07	1.73521e-11	-5.26243e-07	3.49815e-12	7.45361e-12
map-data-2021.01.25-17.48.04.912_1079.jpk-force	1079	1.83594e-06	-1.21094e-06	-7.45266e-09	1.01038e-05	1.17617e-11	-5.2855e-05	-5.01341e-11	-1.45418e-06	1.55433e-11	-1.32643e-06	-2.34309e-11	1.32881e-11
map-data-2021.01.25-17.48.04.912_1080.jpk-force	1080	1.91406e-06	-1.21094e-06	-7.44139e-09	1.01051e-05	1.56767e-11	-5.28645e-05	-1.22251e-11	-1.27273e-06	1.82974e-11	-1.30575e-06	1.66076e-12	7.43116e-12
map-data-2021.01.25-17.48.04.912_1081.jpk-force	1081	1.99219e-06	-1.21094e-06	-7.45376e-09	1.01839e-05	2.77767e-11	-4.30642e-05	-1.8379e-11	-1.18245e-06	1.16151e-11	-1.20213e-06	-3.41093e-13	5.78055e-12
map-data-2021.01.25-17.48.04.912_1082.jpk-force	1082	2.07031e-06	-1.21094e-06	-7.4492e-09	1.02036e-05	6.14191e-12	-5.95624e-05	-1.14662e-11	-1.09375e-06	1.7517e-11	-1.08941e-06	3.91098e-12	7.4351e-12
map-data-2021.01.25-17.48.04.912_1083.jpk-force	1083	2.14844e-06	-1.21094e-06	-7.43946e-09	9.99713e-06	1.5617e-11	-4.6116e-05	-6.23828e-11	-2.06263e-06	2.13253e-11	-2.0346e-06	-2.67958e-11	2.10133e-11
map-data-2021.01.25-17.48.04.912_1084.jpk-force	1084	2.22656e-06	-1.21094e-06	-7.43369e-09	1.04295e-05	1.87174e-11	-5.02361e-05	-6.31202e-11	-1.93349e-06	2.01755e-11	-1.8998e-06	-9.56126e-12	2.48575e-11
map-data-2021.01.25-17.48.04.912_1085.jpk-force	1085	2.30469e-06	-1.21094e-06	-7.44803e-09	1.03173e-05	1.54647e-11	-4.54907e-05	-1.61207e-11	-1.79477e-06	1.38124e-11	-1.81278e-06	2.8014e-13	7.29199e-12
map-data-2021.01.25-17.48.04.912_1086.jpk-force	1086	2.38281e-06	-1.21094e-06	-7.43681e-09	1.01691e-05	6.44336e-12	-4.17426e-05	-1.06686e-11	-1.83341e-06	1.63224e-11	-1.85142e-06	4.93659e-12	6.08558e-12
map-data-2021.01.25-17.48.04.912_1087.jpk-force	1087	2.46094e-06	-1.21094e-06	-7.4133e-09	1.01372e-05	2.84098e-11	-4.20007e-05	-8.95725e-12	-1.83305e-06	2.45861e-11	-1.85173e-06	7.28941e-12	7.11346e-12
map-data-2021.01.25-17.48.04.912_1088.jpk-force	1088	2.46094e-06	-1.13281e-06	-7.38652e-09	1.01814e-05	2.73856e-11	-4.21683e-05	-4.16424e-11	-1.09215e-06	1.79829e-11	-1.04379e-06	-6.4601e-12	1.30008e-11
map-data-2021.01.25-17.48.04.912_1089.jpk-force	1089	2.38281e-06	-1.13281e-06	-7.43777e-09	1.01659e-05	1.67696e-11	-5.66778e-05	-4.26663e-11	-8.02099e-07	1.6103e-11	-6.77377e-07	-1.88903e-11	1.47747e-11
map-data-2021.01.25-17.48.04.912_1090.jpk-force	1090	2.30469e-06	-1.13281e-06	-7.4356e-09	9.93963e-06	2.04136e-11	-4.19369e-05	-1.58347e-11	-7.02533e-07	2.32264e-11	-7.21874e-07	4.19141e-12	8.69769e-12
map-data-2021.01.25-17.48.04.912_1091.jpk-force	1091	2.22656e-06	-1.13281e-06	-7.43472e-09	9.39693e-06	1.86638e-11	-2.71087e-05	-1.22473e-11	-6.98253e-07	3.01299e-11	-6.7791e-07	9.92736e-12	8.55846e-12
map-data-2021.01.25-17.48.04.912_1092.jpk-force	1092	2.14844e-06	-1.13281e-06	-7.4419e-09	1.00464e-05	5.22523e-11	-4.76965e-05	-1.70637e-11	-1.0903e-06	1.03517e-11	-1.08563e-06	-1.63745e-12	7.03968e-12
map-data-2021.01.25-17.48.04.912_1093.jpk-force	1093	2.07031e-06	-1.13281e-06	-7.39397e-09	9.57278e-06	2.0713e-11	-4.4293e-05	-1.22148e-11	-1.08051e-06	1.21542e-11	-1.08718e-06	1.56943e-12	6.82457e-12
map-data-2021.01.25-17.48.04.912_1094.jpk-force	1094	1.99219e-06	-1.13281e-06	-7.41033e-09	1.01653e-05	2.16365e-11	-4.51513e-05	-1.99288e-11	-1.09177e-06	1.92665e-11	-1.0861e-06	-5.25062e-13	1.0552e-11
map-data-2021.01.25-17.48.04.912_1095.jpk-force	1095	1.91406e-06	-1.13281e-06	-7.41419e-09	9.93086e-06	1.30071e-11	-5.5684e-05	-9.41791e-12	-1.08867e-06	8.15153e-12	-1.081e-06	-2.08005e-12	4.13148e-12
map-data-2021.01.25-17.48.04.912_1096.jpk-force	1096	1.83594e-06	-1.13281e-06	-7.40573e-09	9.98722e-06	8.8828e-12	-5.64077e-05	-9.7159e-12	-9.86813e-07	8.4008e-12	-9.81477e-07	-1.06997e-12	4.77198e-12
map-data-2021.01.25-17.48.04.912_1097.jpk-force	1097	1.75781e-06	-1.13281e-06	-7.39295e-09	1.01444e-05	2.01968e-12	-4.46962e-05	-4.32609e-11	-2.14526e-06	1.7296e-11	-2.02047e-06	-1.09852e-11	1.43632e-11
map-data-2021.01.25-17.48.04.912_1098.jpk-force	1098	1.67969e-06	-1.13281e-06	-7.41676e-09	9.93245e-06	1.75261e-11	-6.37118e-05	-1.91449e-11	-2.07957e-06	1.99425e-11	-2.08825e-06	-3.78236e-12	9.33697e-12
map-data-2021.01.25-17.48.04.912_1099.jpk-force	1099	1.60156e-06	-1.13281e-06	-7.55668e-09	1.06829e-05	1.14933e-11	-5.57675e-05	-6.52083e-12	-2.09159e-06	3.04442e-11	-2.0986e-06	1.48923e-11	8.52199e-12
map-data-2021.01.25-17.48.04.912_1100.jpk-force	1100	1.52344e-06	-1.13281e-06	-7.66261e-09	1.1166e-05	1.80876e-11	-5.31875e-05	-4.19043e-12	-2.10669e-06	2.82109e-11	-2.11203e-06	1.09298e-11	6.31972e-12
map-data-2021.01.25-17.48.04.912_1101.jpk-force	1101	1.44531e-06	-1.13281e-06	-7.55771e-09	1.03078e-05	1.2105e-12	-6.18115e-05	-8.81435e-12	-2.07097e-06	3.06989e-11	-2.11268e-06	8.75383e-12	1.08086e-11
map-data-2021.01.25-17.48.04.912_1102.jpk-force	1102	1.36719e-06	-1.13281e-06	-7.4479e-09	1.03332e-05	2.3622e-11	-4.55232e-05	-7.9957e-12	-2.08124e-06	2.1546e-11	-2.08692e-06	6.76193e-12	7.71567e-12
map-data-2021.01.25-17.48.04.912_1103.jpk-force	1103	1.28906e-06	-1.13281e-06	-7.42852e-09	1.00066e-05	6.03134e-12	-5.12861e-05	-1.53438e-11	-2.09302e-06	2.26769e-11	-2.11204e-06	3.12009e-12	8.58461e-12
map-data-2021.01.25-17.48.04.912_1104.jpk-force	1104	1.21094e-06	-1.13281e-06	-7.4317e-09	1.00155e-05	-4.31012e-12	-5.91799e-05	-1.52889e-11	-2.09121e-06	1.99651e-11	-2.08688e-06	4.24684e-12	7.94433e-12
map-data-2021.01.25-17.48.04.912_1105.jpk-force	1105	1.13281e-06	-1.13281e-06	-7.46981e-09	9.89787e-06	1.04386e-11	-5.35421e-05	-1.94692e-11	-2.06715e-06	2.64125e-11	-2.11019e-06	1.33162e-12	1.13001e-11
map-data-2021.01.25-17.48.04.912_1106.jpk-force	1106	1.05469e-06	-1.13281e-06	-7.46633e-09	9.99852e-06	-2.56714e-11	-7.11368e-05	-9.62408e-12	-1.33311e-06	1.99136e-11	-1.3071e-06	1.23667e-12	6.49967e-12
map-data-2021.01.25-17.48.04.912_1107.jpk-force	1107	9.76563e-07	-1.13281e-06	-7.44487e-09	9.92229e-06	1.22383e-11	-4.68763e-05	-1.48413e-11	-1.30953e-06	9.67327e-12	-1.31386e-06	-1.68395e-12	5.08083e-12
map-data-2021.01.25-17.48.04.912_1108.jpk-force	1108	8.98437e-07	-1.13281e-06	-7.43746e-09	9.87485e-06	1.4788e-12	-5.74883e-05	-1.22749e-11	-1.31322e-06	1.99897e-11	-1.31822e-06	6.05949e-13	8.29547e-12
map-data-2021.01.25-17.48.04.912_1109.jpk-force	1109	8.20312e-07	-1.13281e-06	-7.45736e-09	9.78002e-06	1.63039e-11	-6.10705e-05	-5.37021e-11	-1.24945e-06	1.65316e-11	-1.17675e-06	-1.75301e-11	1.80392e-11
map-data-2021.01.25-17.48.04.912_1110.jpk-force	1110	7.42187e-07	-1.13281e-06	-7.44746e-09	9.63822e-06	-1.30602e-10	-0.000118379	-4.25552e-11	-2.59926e-06	1.43182e-11	-2.56856e-06	-1.90926e-11	1.57258e-11
map-data-2021.01.25-17.48.04.912_1111.jpk-force	1111	6.64062e-07	-1.13281e-06	-7.45619e-09	9.70443e-06	1.50695e-11	-6.00245e-05	-1.40153e-11	-1.56901e-06	2.41403e-11	-1.565e-06	3.76833e-13	8.47745e-12
map-data-2021.01.25-17.48.04.912_1112.jpk-force	1112	5.85938e-07	-1.13281e-06	-7.40439e-09	9.94589e-06	-9.64055e-11	-8.09382e-05	-1.08048e-11	-1.96082e-06	1.58686e-11	-1.9695e-06	1.45867e-12	7.67601e-12
map-data-2021.01.25-17.48.04.912_1113.jpk-force	1113	5.07813e-07	-1.13281e-06	-7.44361e-09	1.07222e-05	1.76136e-11	-5.41059e-05	-1.83291e-11	-1.97686e-06	9.31464e-12	-1.95884e-06	-2.00686e-12	8.2521e-12
map-data-2021.01.25-17.48.04.912_1114.jpk-force	1114	4.29687e-07	-1.13281e-06	-7.44175e-09	1.0025e-05	6.31436e-11	-3.39551e-05	-9.44059e-12	-1.95885e-06	1.53673e-11	-1.96585e-06	2.62768e-12	6.53449e-12
map-data-2021.01.25-17.48.04.912_1115.jpk-force	1115	3.51563e-07	-1.13281e-06	-7.45423e-09	1.02958e-05	-2.60544e-10	-0.00018478	-3.48599e-12	-1.9773e-06	2.0747e-11	-1.96595e-06	7.50376e-12	7.20763e-12
map-data-2021.01.25-17.48.04.912_1116.jpk-force	1116	2.73438e-07	-1.13281e-06	-7.48133e-09	1.02693e-05	1.65792e-11	-4.74066e-05	-6.31769e-11	-1.72785e-06	9.01955e-12	-1.67847e-06	-4.00734e-11	1.63326e-11
map-data-2021.01.25-17.48.04.912_1117.jpk-force	1117	1.95312e-07	-1.13281e-06	-7.43612e-09	1.01838e-05	2.13005e-11	-4.03253e-05	-5.00996e-11	-1.55911e-06	2.02087e-11	-1.49739e-06	-1.44568e-11	1.58471e-11
map-data-2021.01.25-17.48.04.912_1118.jpk-force	1118	1.17187e-07	-1.13281e-06	-7.45604e-09	1.06718e-05	-5.05452e-12	-4.92575e-05	-1.03902e-11	-1.18284e-06	1.00026e-11	-1.18884e-06	1.88547e-12	6.16283e-12
map-data-2021.01.25-17.48.04.912_1119.jpk-force	1119	3.90618e-08	-1.13281e-06	-7.43399e-09	9.53408e-06	9.61439e-13	-7.84379e-05	-1.64904e-11	-7.27172e-07	1.91399e-11	-7.45858e-07	1.31791e-12	8.95065e-12
map-data-2021.01.25-17.48.04.912_1120.jpk-force	1120	-3.90623e-08	-1.13281e-06	-7.49147e-09	1.04597e-05	1.31225e-11	-5.24639e-05	-1.05461e-11	-5.69124e-07	1.06579e-11	-5.75127e-07	1.77981e-12	6.27838e-12
map-data-2021.01.25-17.48.04.912_1121.jpk-force	1121	-1.17187e-07	-1.13281e-06	-7.45767e-09	1.0425e-05	2.27608e-12	-5.09676e-05	-9.66525e-12	-5.71957e-07	2.3384e-11	-5.65621e-07	1.86251e-12	9.95913e-12
map-data-2021.01.25-17.48.04.912_1122.jpk-force	1122	-1.95313e-07	-1.13281e-06	-7.45421e-09	1.03784e-05	5.20945e-12	-5.83634e-05	-4.53017e-12	-5.75453e-07	1.25912e-11	-5.65782e-07	2.83781e-12	4.97629e-12
map-data-2021.01.25-17.48.04.912_1123.jpk-force	1123	-2.73438e-07	-1.13281e-06	-7.46116e-09	1.04468e-05	2.36246e-11	-4.71027e-05	-1.40651e-11	-1.1817e-06	1.78435e-11	-1.1e-06	5.46935e-13	6.79178e-12
map-data-2021.01.25-17.48.04.912_1124.jpk-force	1124	-3.51563e-07	-1.13281e-06	-7.45197e-09	1.05643e-05	3.94464e-12	-5.29424e-05	-5.94988e-11	-2.11597e-06	1.4668e-11	-2.03389e-06	-3.33989e-11	1.73963e-11
map-data-2021.01.25-17.48.04.912_1125.jpk-force	1125	-4.29688e-07	-1.13281e-06	-7.50768e-09	1.06175e-05	1.41239e-11	-5.20531e-05	-1.62772e-11	-1.79697e-07	2.15199e-11	-1.99373e-07	1.5898e-12	8.73812e-12
map-data-2021.01.25-17.48.04.912_1126.jpk-force	1126	-5.07813e-07	-1.13281e-06	-7.51637e-09	1.08974e-05	5.66586e-13	-7.60123e-05	-4.58984e-11	-1.97991e-06	1.60637e-11	-1.87445e-06	-1.71338e-11	1.79517e-11
map-data-2021.01.25-17.48.04.912_1127.jpk-force	1127	-5.85938e-07	-1.13281e-06	-7.49716e-09	1.05645e-05	-3.4701e-11	-0.000118006	-6.31019e-11	-1.91108e-06	-2.68131e-11	-1.96648e-06	-4.36892e-11	7.83647e-12
map-data-2021.01.25-17.48.04.912_1128.jpk-force	1128	-6.64063e-07	-1.13281e-06	-7.52235e-09	1.07388e-05	1.66574e-11	-4.56376e-05	-1.74599e-11	-3.25469e-07	1.12064e-11	-3.06793e-07	-1.23438e-12	6.05266e-12
map-data-2021.01.25-17.48.04.912_1129.jpk-force	1129	-7.42187e-07	-1.13281e-06	-7.53822e-09	1.00404e-05	3.29235e-11	-3.66316e-05	-5.96989e-11	1.44068e-07	2.22735e-11	2.04095e-07	-2.62795e-11	1.58312e-11
map-data-2021.01.25-17.48.04.912_1130.jpk-force	1130	-8.20313e-07	-1.13281e-06	-7.51591e-09	9.80027e-06	8.45993e-11	-4.79728e-05	-6.84441e-11	-7.29755e-07	1.59003e-11	-6.98062e-07	-1.17346e-11	1.33459e-11
map-data-2021.01.25-17.48.04.912_1131.jpk-force	1131	-8.98437e-07	-1.13281e-06	-7.45944e-09	1.09214e-05	-1.28714e-12	-4.83152e-05	-1.26489e-11	-1.71645e-06	2.27562e-11	-1.71211e-06	4.96997e-12	8.25617e-12
map-data-2021.01.25-17.48.04.912_1132.jpk-force	1132	-9.76563e-07	-1.13281e-06	-7.45771e-09	1.08386e-05	-7.71816e-12	-6.21986e-05	-3.86739e-11	-1.16779e-06	1.74884e-11	-1.29319e-06	-6.54551e-12	1.1357e-11
map-data-2021.01.25-17.48.04.912_1133.jpk-force	1133	-1.05469e-06	-1.13281e-06	-7.44777e-09	1.03401e-05	3.77877e-11	-4.11195e-05	-1.23726e-11	-5.5511e-07	2.01201e-11	-5.12758e-07	4.52688e-12	7.63949e-12
map-data-2021.01.25-17.48.04.912_1134.jpk-force	1134	-1.13281e-06	-1.13281e-06	-7.45644e-09	1.09787e-05	3.35309e-12	-6.47439e-05	-7.00252e-11	-2.43197e-06	8.61165e-12	-2.5648e-06	-2.19077e-11	1.69923e-11
map-data-2021.01.25-17.48.04.912_1135.jpk-force	1135	-1.21094e-06	-1.13281e-06	-7.43259e-09	1.04121e-05	3.59068e-11	-4.24146e-05	-6.52762e-11	1.94945e-07	8.58407e-13	2.13953e-07	-3.67618e-11	1.44473e-11
map-data-2021.01.25-17.48.04.912_1136.jpk-force	1136	-1.28906e-06	-1.13281e-06	-7.4555e-09	1.05721e-05	1.74372e-11	-0.000165384	-1.30651e-11	6.74173e-08	7.06021e-11	2.40498e-07	2.9318e-11	2.51252e-11
map-data-2021.01.25-17.48.04.912_1137.jpk-force	1137	-1.36719e-06	-1.13281e-06	-7.46892e-09	1.11685e-05	1.09026e-11	-4.88742e-05	-4.80703e-11	-2.20775e-06	2.01989e-11	-2.12467e-06	-1.5028e-11	1.92077e-11
map-data-2021.01.25-17.48.04.912_1138.jpk-force	1138	-1.44531e-06	-1.13281e-06	-7.44145e-09	1.05794e-05	1.79307e-11	-6.01962e-05	-3.835e-11	-8.7304e-07	2.17339e-11	-8.36691e-07	-7.14696e-12	1.27647e-11
map-data-2021.01.25-17.48.04.912_1139.jpk-force	1139	-1.52344e-06	-1.13281e-06	-7.44764e-09	1.08053e-05	9.68865e-12	-4.96185e-05	-1.09029e-11	-8.17932e-07	2.08801e-11	-8.50613e-07	3.86476e-12	7.2772e-12
map-data-2021.01.25-17.48.04.912_1140.jpk-force	1140	-1.60156e-06	-1.13281e-06	-7.48265e-09	1.11619e-05	1.38626e-11	-7.04503e-05	-1.59104e-11	-6.50586e-07	1.63884e-11	-6.55921e-07	5.99935e-13	8.31027e-12
map-data-2021.01.25-17.48.04.912_1141.jpk-force	1141	-1.67969e-06	-1.13281e-06	-7.4647e-09	1.03713e-05	1.00905e-10	-3.19191e-05	-4.37393e-11	-1.91382e-06	2.35847e-11	-1.90615e-06	-1.04617e-11	1.53498e-11
map-data-2021.01.25-17.48.04.912_1142.jpk-force	1142	-1.75781e-06	-1.13281e-06	-7.43964e-09	1.01744e-05	2.15707e-12	-0.000102818	-9.65839e-12	-1.91102e-06	3.7568e-11	-2.00676e-06	1.18216e-11	8.52193e-12
map-data-2021.01.25-17.48.04.912_1143.jpk-force	1143	-1.83594e-06	-1.13281e-06	-7.4476e-09	1.00183e-05	1.64321e-11	-8.42229e-05	-1.38078e-11	-1.91001e-06	3.38206e-11	-2.02746e-06	1.24705e-11	9.57805e-12
map-data-2021.01.25-17.48.04.912_1144.jpk-force	1144	-1.91406e-06	-1.13281e-06	-7.5299e-09	1.07214e-05	1.23924e-11	-7.51834e-05	-1.72901e-11	-5.44057e-07	1.52008e-11	-5.38721e-07	1.0721e-12	8.19721e-12
map-data-2021.01.25-17.48.04.912_1145.jpk-force	1145	-1.99219e-06	-1.13281e-06	-7.53732e-09	1.07538e-05	2.461e-11	-7.60885e-05	-5.30755e-11	-2.1212e-06	2.18466e-11	-1.90497e-06	-1.37899e-11	1.88189e-11
map-data-2021.01.25-17.48.04.912_1146.jpk-force	1146	-2.07031e-06	-1.13281e-06	-7.52774e-09	1.05816e-05	6.49198e-12	-8.31573e-05	-5.38875e-11	-2.45896e-06	1.21415e-11	-2.44995e-06	-2.28237e-11	1.3859e-11
map-data-2021.01.25-17.48.04.912_1147.jpk-force	1147	-2.14844e-06	-1.13281e-06	-7.52441e-09	1.05644e-05	4.73002e-11	-3.70424e-05	-6.076e-11	3.50485e-07	1.74838e-11	4.44862e-07	-2.03898e-11	2.22987e-11
map-data-2021.01.25-17.48.04.912_1148.jpk-force	1148	-2.22656e-06	-1.13281e-06	-7.51164e-09	1.0571e-05	2.01946e-11	-5.33664e-05	-1.6601e-11	9.05526e-08	1.75524e-11	5.8205e-08	-4.77458e-13	7.4334e-12
map-data-2021.01.25-17.48.04.912_1149.jpk-force	1149	-2.30469e-06	-1.13281e-06	-7.53259e-09	1.14939e-05	1.05005e-11	-5.47677e-05	-1.87039e-11	2.81242e-08	1.96445e-11	8.51451e-08	-1.56272e-12	7.65487e-12
map-data-2021.01.25-17.48.04.912_1150.jpk-force	1150	-2.38281e-06	-1.13281e-06	-7.50704e-09	1.08854e-05	1.36406e-11	-4.52385e-05	-6.43266e-12	-2.32419e-07	3.64521e-12	-2.30752e-07	-3.70886e-13	2.6463e-12
map-data-2021.01.25-17.48.04.912_1151.jpk-force	1151	-2.46094e-06	-1.13281e-06	-7.55044e-09	1.12455e-05	1.57184e-11	-5.19259e-05	-1.93975e-11	-2.37647e-07	1.27699e-11	-2.41649e-07	-1.14326e-12	8.42501e-12
map-data-2021.01.25-17.48.04.912_1152.jpk-force	1152	-2.46094e-06	-1.05469e-06	-7.55283e-09	1.15402e-05	1.72009e-11	-5.37109e-05	-1.58437e-11	-2.34657e-07	1.14087e-11	-2.24985e-07	-2.02022e-12	6.92847e-12
map-data-2021.01.25-17.48.04.912_1153.jpk-force	1153	-2.38281e-06	-1.05469e-06	-7.59386e-09	1.11815e-05	2.5493e-11	-5.57789e-05	-1.44022e-11	-2.35457e-07	4.98287e-12	-2.30121e-07	-2.65118e-12	5.41511e-12
map-data-2021.01.25-17.48.04.912_1154.jpk-force	1154	-2.30469e-06	-1.05469e-06	-7.55219e-09	1.16928e-05	3.61661e-12	-7.31058e-05	-3.99714e-11	-1.56957e-06	1.54067e-11	-1.54088e-06	-1.77298e-11	1.08739e-11
map-data-2021.01.25-17.48.04.912_1155.jpk-force	1155	-2.22656e-06	-1.05469e-06	-7.5248e-09	1.11641e-05	2.34105e-12	-6.65082e-05	-5.12117e-11	-2.44519e-06	-6.75477e-12	-2.41182e-06	-2.68208e-11	1.14715e-11
map-data-2021.01.25-17.48.04.912_1156.jpk-force	1156	-2.14844e-06	-1.05469e-06	-7.48839e-09	1.11031e-05	2.1774e-11	-6.18112e-05	-1.30956e-11	-1.37725e-06	1.77226e-11	-1.36958e-06	4.67197e-12	8.29665e-12
map-data-2021.01.25-17.48.04.912_1157.jpk-force	1157	-2.07031e-06	-1.05469e-06	-7.49839e-09	1.11248e-05	4.5076e-11	-4.62729e-05	-5.36784e-11	-2.14431e-06	2.34845e-11	-2.09025e-06	-2.09526e-11	2.07297e-11
map-data-2021.01.25-17.48.04.912_1158.jpk-force	1158	-1.99219e-06	-1.05469e-06	-7.57594e-09	9.19686e-06	5.62943e-11	-2.73659e-05	-1.87344e-11	1.7947e-06	1.59269e-11	1.79937e-06	-2.136e-12	8.68692e-12
map-data-2021.01.25-17.48.04.912_1159.jpk-force	1159	-1.91406e-06	-1.05469e-06	-7.51418e-09	1.11736e-05	1.72038e-11	-4.04597e-05	-5.53332e-11	-1.21453e-06	1.34287e-11	-1.04946e-06	-2.60484e-11	1.57386e-11
map-data-2021.01.25-17.48.04.912_1160.jpk-force	1160	-1.83594e-06	-1.05469e-06	-7.50662e-09	1.13989e-05	7.80356e-12	-5.86251e-05	-1.56879e-11	-3.64563e-07	1.1768e-11	-3.26879e-07	-1.64829e-12	6.14252e-12
map-data-2021.01.25-17.48.04.912_1161.jpk-force	1161	-1.75781e-06	-1.05469e-06	-7.55339e-09	1.13609e-05	1.64975e-11	-4.60748e-05	-3.79386e-11	-1.1829e-06	6.46744e-12	-1.14589e-06	-2.01549e-11	1.04341e-11
map-data-2021.01.25-17.48.04.912_1162.jpk-force	1162	-1.67969e-06	-1.05469e-06	-7.50227e-09	1.14945e-05	1.9832e-11	-3.94406e-05	-4.12939e-11	-1.38726e-06	2.07255e-11	-1.3269e-06	-1.17455e-11	1.55626e-11
map-data-2021.01.25-17.48.04.912_1163.jpk-force	1163	-1.60156e-06	-1.05469e-06	-7.54958e-09	1.09329e-05	-1.3957e-10	-0.000139913	-4.10203e-11	-2.80228e-06	2.23386e-11	-2.68114e-06	-8.17937e-12	1.55111e-11
map-data-2021.01.25-17.48.04.912_1164.jpk-force	1164	-1.52344e-06	-1.05469e-06	-7.5833e-09	1.1279e-05	7.69867e-12	-7.73496e-05	-9.49244e-11	-2.0921e-06	1.95845e-11	-1.9663e-06	-4.54696e-11	3.5385e-11
map-data-2021.01.25-17.48.04.912_1165.jpk-force	1165	-1.44531e-06	-1.05469e-06	-7.49939e-09	1.10717e-05	4.85811e-11	-5.52906e-05	-5.17569e-11	6.79462e-10	1.42381e-11	8.37159e-08	-2.58222e-11	1.36495e-11
map-data-2021.01.25-17.48.04.912_1166.jpk-force	1166	-1.36719e-06	-1.05469e-06	-7.46719e-09	1.06021e-05	4.60766e-11	-4.63484e-05	-5.61851e-11	1.34313e-09	4.68247e-12	1.20728e-07	-2.59548e-11	1.37431e-11
map-data-2021.01.25-17.48.04.912_1167.jpk-force	1167	-1.28906e-06	-1.05469e-06	-7.49261e-09	1.05497e-05	6.26582e-11	-5.63466e-05	-6.84096e-11	3.11308e-08	1.52164e-11	1.3951e-07	-2.56489e-11	2.25917e-11
map-data-2021.01.25-17.48.04.912_1168.jpk-force	1168	-1.21094e-06	-1.05469e-06	-7.51165e-09	1.08069e-05	1.15151e-11	-7.18455e-05	-1.70601e-11	1.29041e-07	1.55433e-11	1.10699e-07	-1.0067e-12	7.37464e-12
map-data-2021.01.25-17.48.04.912_1169.jpk-force	1169	-1.13281e-06	-1.05469e-06	-7.54397e-09	1.02392e-05	7.31961e-11	-0.00010248	-1.40668e-11	2.21119e-07	1.26051e-11	2.28789e-07	-6.76259e-13	6.41384e-12
map-data-2021.01.25-17.48.04.912_1170.jpk-force	1170	-1.05469e-06	-1.05469e-06	-7.48942e-09	1.12642e-05	-4.21066e-12	-5.76657e-05	-5.49598e-11	-2.0557e-06	1.77716e-11	-2.00632e-06	-2.74883e-11	1.71531e-11
map-data-2021.01.25-17.48.04.912_1171.jpk-force	1171	-9.76563e-07	-1.05469e-06	-7.48847e-09	1.04593e-05	9.54546e-11	-3.54723e-05	-4.59521e-11	-1.44067e-06	1.32192e-11	-1.42231e-06	-1.50062e-11	1.35714e-11
map-data-2021.01.25-17.48.04.912_1172.jpk-force	1172	-8.98437e-07	-1.05469e-06	-7.50971e-09	1.06858e-05	4.15233e-11	-3.77038e-05	-7.83588e-11	2.89625e-07	1.49484e-11	3.34312e-07	-4.04986e-11	2.60029e-11
map-data-2021.01.25-17.48.04.912_1173.jpk-force	1173	-8.20313e-07	-1.05469e-06	-7.49663e-09	1.10218e-05	2.05836e-11	-4.66932e-05	-4.08301e-11	-1.25085e-06	2.10903e-11	-1.17747e-06	-1.4916e-11	1.32903e-11
map-data-2021.01.25-17.48.04.912_1174.jpk-force	1174	-7.42187e-07	-1.05469e-06	-7.50789e-09	1.07631e-05	2.13498e-11	-7.2089e-05	-6.2757e-11	-8.18326e-07	1.05222e-12	-7.68966e-07	-3.40389e-11	1.62076e-11
map-data-2021.01.25-17.48.04.912_1175.jpk-force	1175	-6.64063e-07	-1.05469e-06	-7.45978e-09	1.01814e-05	2.741e-11	-2.39155e-05	-4.58581e-11	1.03081e-07	1.15284e-11	1.60772e-07	-1.70255e-11	1.52592e-11
map-data-2021.01.25-17.48.04.912_1176.jpk-force	1176	-5.85938e-07	-1.05469e-06	-7.44527e-09	1.09437e-05	1.6402e-11	-3.6856e-05	-1.19384e-11	2.26169e-07	1.61051e-11	2.29837e-07	-9.20874e-13	7.34933e-12
map-data-2021.01.25-17.48.04.912_1177.jpk-force	1177	-5.07813e-07	-1.05469e-06	-7.51422e-09	1.15843e-05	-2.11727e-12	-7.56126e-05	-4.53486e-12	-1.07364e-06	1.31902e-11	-1.07865e-06	2.32093e-12	5.22795e-12
map-data-2021.01.25-17.48.04.912_1178.jpk-force	1178	-4.29688e-07	-1.05469e-06	-7.4743e-09	1.04147e-05	8.44471e-12	-9.74554e-05	-4.73325e-11	-1.3649e-06	2.01364e-11	-1.31651e-06	-1.75637e-11	1.91201e-11
map-data-2021.01.25-17.48.04.912_1179.jpk-force	1179	-3.51563e-07	-1.05469e-06	-7.42032e-09	1.06906e-05	4.47738e-11	-3.89555e-05	-5.76073e-11	1.05362e-07	1.83334e-11	1.64387e-07	-2.9418e-11	1.73654e-11
map-data-2021.01.25-17.48.04.912_1180.jpk-force	1180	-2.73438e-07	-1.05469e-06	-7.45773e-09	1.12998e-05	1.08619e-11	-4.65405e-05	-1.74452e-11	9.07119e-08	9.69437e-12	8.60441e-08	-2.50691e-12	6.06744e-12
map-data-2021.01.25-17.48.04.912_1181.jpk-force	1181	-1.95313e-07	-1.05469e-06	-7.46431e-09	1.05754e-05	3.99878e-11	-4.12082e-05	-4.54274e-11	6.9607e-08	1.31963e-11	7.49426e-08	-2.21189e-11	1.04471e-11
map-data-2021.01.25-17.48.04.912_1182.jpk-force	1182	-1.17188e-07	-1.05469e-06	-7.46109e-09	1.10559e-05	1.9816e-11	-4.46103e-05	-1.62049e-11	-1.0004e-06	1.79848e-11	-1.09878e-06	-1.65431e-12	6.93375e-12
map-data-2021.01.25-17.48.04.912_1183.jpk-force	1183	-3.90635e-08	-1.05469e-06	-7.46644e-09	1.12851e-05	1.96431e-11	-4.58615e-05	-1.79389e-11	-9.97496e-07	1.6579e-11	-1.00483e-06	-6.2113e-13	7.77766e-12
map-data-2021.01.25-17.48.04.912_1184.jpk-force	1184	3.90618e-08	-1.05469e-06	-7.47392e-09	1.20131e-05	2.49653e-11	-4.30347e-05	-6.75627e-11	-1.5998e-06	2.01434e-11	-1.41302e-06	-2.15811e-11	2.48688e-11
map-data-2021.01.25-17.48.04.912_1185.jpk-force	1185	1.17188e-07	-1.05469e-06	-7.47086e-09	1.11592e-05	1.3436e-11	-4.83991e-05	-1.10486e-11	-1.38741e-06	3.54808e-11	-1.65464e-06	8.90896e-12	9.1398e-12
map-data-2021.01.25-17.48.04.912_1186.jpk-force	1186	1.95312e-07	-1.05469e-06	-7.50678e-09	1.13492e-05	7.81899e-12	-6.32407e-05	-1.90407e-11	-6.36941e-07	2.31412e-11	-5.87919e-07	-1.24969e-12	8.06749e-12
map-data-2021.01.25-17.48.04.912_1187.jpk-force	1187	2.73438e-07	-1.05469e-06	-7.49769e-09	1.16409e-05	1.75271e-11	-3.94132e-05	-1.76661e-11	-5.98834e-07	1.77259e-11	-6.31516e-07	-5.33777e-13	7.39102e-12
map-data-2021.01.25-17.48.04.912_1188.jpk-force	1188	3.51562e-07	-1.05469e-06	-7.47518e-09	1.134e-05	1.5898e-11	-6.81395e-05	-9.57617e-12	-5.90112e-07	2.35085e-11	-6.3213e-07	3.45448e-12	7.06944e-12
map-data-2021.01.25-17.48.04.912_1189.jpk-force	1189	4.29686e-07	-1.05469e-06	-7.46661e-09	1.14982e-05	1.9145e-11	-4.20791e-05	-1.34718e-11	-6.35373e-07	1.62451e-11	-5.99691e-07	1.44677e-12	6.53122e-12
map-data-2021.01.25-17.48.04.912_1190.jpk-force	1190	5.07812e-07	-1.05469e-06	-7.45695e-09	1.13957e-05	1.50078e-11	-4.3944e-05	-1.57624e-11	-5.9792e-07	1.53023e-11	-6.31602e-07	-1.60115e-12	8.02655e-12
map-data-2021.01.25-17.48.04.912_1191.jpk-force	1191	5.85936e-07	-1.05469e-06	-7.46784e-09	1.01737e-05	6.32511e-11	-4.03958e-05	-5.50032e-11	1.3253e-06	2.14209e-11	1.39932e-06	-2.29887e-11	2.17436e-11
map-data-2021.01.25-17.48.04.912_1192.jpk-force	1192	6.64062e-07	-1.05469e-06	-7.47663e-09	1.18716e-05	3.56565e-12	-5.36504e-05	-4.80555e-11	-2.41762e-06	2.20641e-11	-2.39826e-06	-1.6724e-11	1.88589e-11
map-data-2021.01.25-17.48.04.912_1193.jpk-force	1193	7.42187e-07	-1.05469e-06	-7.52319e-09	1.12874e-05	1.62265e-12	-8.02386e-05	-1.42597e-11	-2.34121e-06	4.18099e-11	-2.41397e-06	1.45498e-11	1.20305e-11
map-data-2021.01.25-17.48.04.912_1194.jpk-force	1194	8.20312e-07	-1.05469e-06	-7.48783e-09	1.17942e-05	1.11128e-11	-5.78771e-05	-1.72176e-11	-2.42689e-06	2.98572e-11	-2.46193e-06	5.82437e-12	9.72128e-12
map-data-2021.01.25-17.48.04.912_1195.jpk-force	1195	8.98437e-07	-1.05469e-06	-7.45529e-09	1.0851e-05	1.43218e-11	-2.7882e-05	-1.62531e-11	-4.91806e-07	1.52938e-11	-5.09816e-07	-3.35e-12	7.38578e-12
map-data-2021.01.25-17.48.04.912_1196.jpk-force	1196	9.76562e-07	-1.05469e-06	-7.45902e-09	1.11855e-05	-2.86653e-13	-5.63443e-05	-8.03081e-12	-4.78913e-07	2.4765e-11	-4.87584e-07	1.02196e-11	8.5817e-12
map-data-2021.01.25-17.48.04.912_1197.jpk-force	1197	1.05469e-06	-1.05469e-06	-7.44322e-09	1.10091e-05	6.27018e-12	-4.82896e-05	-4.31091e-12	-5.05532e-07	1.97307e-11	-4.85522e-07	6.26619e-12	5.53092e-12
map-data-2021.01.25-17.48.04.912_1198.jpk-force	1198	1.13281e-06	-1.05469e-06	-7.44572e-09	1.10165e-05	2.20421e-11	-4.20949e-05	-1.71758e-11	-5.09886e-07	7.84233e-13	-4.97547e-07	-1.01615e-11	4.67768e-12
map-data-2021.01.25-17.48.04.912_1199.jpk-force	1199	1.21094e-06	-1.05469e-06	-7.4365e-09	1.09967e-05	-5.49436e-11	-8.00256e-05	-4.40283e-11	-2.45649e-06	1.76195e-11	-2.42211e-06	-1.62233e-11	1.72688e-11
map-data-2021.01.25-17.48.04.912_1200.jpk-force	1200	1.28906e-06	-1.05469e-06	-7.41278e-09	1.08756e-05	1.10923e-12	-5.58693e-05	-2.08613e-11	-2.45783e-06	1.48534e-11	-2.47819e-06	-2.16814e-12	8.83933e-12
map-data-2021.01.25-17.48.04.912_1201.jpk-force	1201	1.36719e-06	-1.05469e-06	-7.40591e-09	1.08902e-05	1.83734e-11	-5.68977e-05	-3.81784e-11	-2.181e-06	1.17398e-11	-2.05587e-06	-1.35855e-11	1.21032e-11
map-data-2021.01.25-17.48.04.912_1202.jpk-force	1202	1.44531e-06	-1.05469e-06	-7.43388e-09	1.07813e-05	-2.49669e-11	-8.78645e-05	-1.81397e-11	-1.6027e-06	1.9813e-11	-1.61904e-06	-2.12355e-12	7.68049e-12
map-data-2021.01.25-17.48.04.912_1203.jpk-force	1203	1.52344e-06	-1.05469e-06	-7.42091e-09	1.1044e-05	-4.53042e-12	-6.00681e-05	-6.52978e-11	-2.52313e-06	1.90836e-11	-2.42567e-06	-2.88437e-11	2.22041e-11
map-data-2021.01.25-17.48.04.912_1204.jpk-force	1204	1.60156e-06	-1.05469e-06	-7.41918e-09	1.11583e-05	2.19795e-11	-4.5888e-05	-1.43972e-11	-1.84197e-06	7.39661e-12	-1.84864e-06	-5.66805e-13	5.67577e-12
map-data-2021.01.25-17.48.04.912_1205.jpk-force	1205	1.67969e-06	-1.05469e-06	-7.39886e-09	1.09278e-05	-1.86871e-12	-5.82723e-05	-9.88611e-12	-1.85362e-06	1.52771e-11	-1.83961e-06	8.40868e-14	6.66363e-12
map-data-2021.01.25-17.48.04.912_1206.jpk-force	1206	1.75781e-06	-1.05469e-06	-7.41922e-09	1.07807e-05	2.69418e-11	-5.37824e-05	-1.67139e-11	-1.29691e-06	1.1539e-11	-1.29224e-06	-2.05815e-12	6.947e-12
map-data-2021.01.25-17.48.04.912_1207.jpk-force	1207	1.83594e-06	-1.05469e-06	-7.38551e-09	1.05277e-05	-5.32781e-13	-5.84533e-05	-1.64039e-11	-1.29552e-06	1.69941e-11	-1.2655e-06	9.62109e-13	9.15957e-12
map-data-2021.01.25-17.48.04.912_1208.jpk-force	1208	1.91406e-06	-1.05469e-06	-7.3964e-09	1.02391e-05	2.14814e-11	-4.79381e-05	-9.99411e-12	-1.29904e-06	2.30557e-11	-1.2937e-06	4.55159e-12	8.29021e-12
map-data-2021.01.25-17.48.04.912_1209.jpk-force	1209	1.99219e-06	-1.05469e-06	-7.38462e-09	1.03183e-05	1.1966e-11	-5.00424e-05	-1.63041e-11	-1.28686e-06	1.90948e-11	-1.3042e-06	1.84299e-12	8.52235e-12
map-data-2021.01.25-17.48.04.912_1210.jpk-force	1210	2.07031e-06	-1.05469e-06	-7.37394e-09	1.00754e-05	-4.2095e-12	-6.71137e-05	-4.85949e-11	-1.81254e-06	2.1367e-11	-1.76083e-06	-2.03729e-11	1.44925e-11
map-data-2021.01.25-17.48.04.912_1211.jpk-force	1211	2.14844e-06	-1.05469e-06	-7.44705e-09	1.03188e-05	3.90035e-12	-6.42862e-05	-9.81927e-12	-8.55547e-07	1.97454e-11	-8.60216e-07	1.36794e-12	6.52931e-12
map-data-2021.01.25-17.48.04.912_1212.jpk-force	1212	2.22656e-06	-1.05469e-06	-7.31771e-09	9.31015e-06	8.20162e-11	5.34273e-06	-1.21232e-11	-1.06804e-06	1.57251e-11	-1.0587e-06	3.45483e-12	7.95441e-12
map-data-2021.01.25-17.48.04.912_1213.jpk-force	1213	2.30469e-06	-1.05469e-06	-7.24495e-09	9.95339e-06	5.53766e-11	-2.41371e-05	-1.93454e-11	-1.06649e-06	1.2952e-12	-1.05315e-06	-9.87085e-12	5.34238e-12
map-data-2021.01.25-17.48.04.912_1214.jpk-force	1214	2.38281e-06	-1.05469e-06	-7.30859e-09	1.03769e-05	7.14026e-11	-1.86353e-06	-5.38796e-11	-1.44171e-06	1.20091e-11	-1.38035e-06	-2.99115e-11	1.68108e-11
map-data-2021.01.25-17.48.04.912_1215.jpk-force	1215	2.46094e-06	-1.05469e-06	-7.41842e-09	1.07628e-05	1.33402e-11	-4.84383e-05	-4.67878e-11	-1.11506e-06	2.32849e-11	-1.05703e-06	-2.2488e-11	1.57219e-11
map-data-2021.01.25-17.48.04.912_1216.jpk-force	1216	2.46094e-06	-9.76562e-07	-7.38902e-09	1.07155e-05	1.87263e-11	-4.69516e-05	-1.75237e-11	-1.1714e-06	1.89391e-11	-1.0967e-06	3.5618e-12	6.65409e-12
map-data-2021.01.25-17.48.04.912_1217.jpk-force	1217	2.38281e-06	-9.76562e-07	-7.37962e-09	1.03793e-05	1.46627e-11	-2.96709e-05	-1.60944e-11	-1.16911e-06	2.6254e-11	-1.08774e-06	3.6201e-12	8.95597e-12
map-data-2021.01.25-17.48.04.912_1218.jpk-force	1218	2.30469e-06	-9.76562e-07	-7.3613e-09	9.96245e-06	1.66244e-11	-4.45816e-05	-2.329e-12	-1.1812e-06	3.21005e-11	-1.04279e-06	1.22055e-11	7.1915e-12
map-data-2021.01.25-17.48.04.912_1219.jpk-force	1219	2.22656e-06	-9.76562e-07	-7.35061e-09	1.01721e-05	-3.0727e-11	-7.25782e-05	-1.6271e-11	-1.86871e-06	1.91616e-11	-1.87604e-06	3.23466e-12	8.99847e-12
map-data-2021.01.25-17.48.04.912_1220.jpk-force	1220	2.14844e-06	-9.76562e-07	-7.36429e-09	9.41684e-06	-1.18055e-11	-0.000112461	-3.77728e-11	-1.52282e-06	4.92016e-12	-1.4811e-06	-1.31269e-11	1.19283e-11
map-data-2021.01.25-17.48.04.912_1221.jpk-force	1221	2.07031e-06	-9.76562e-07	-7.38056e-09	1.04847e-05	-1.64649e-11	-6.56189e-05	-1.27922e-11	-1.49136e-06	2.05746e-11	-1.48569e-06	4.34062e-12	6.54604e-12
map-data-2021.01.25-17.48.04.912_1222.jpk-force	1222	1.99219e-06	-9.76562e-07	-7.41773e-09	1.04676e-05	-4.12315e-11	-8.89407e-05	-1.60067e-11	-1.55851e-06	3.7293e-11	-1.49881e-06	9.98607e-12	9.47369e-12
map-data-2021.01.25-17.48.04.912_1223.jpk-force	1223	1.91406e-06	-9.76562e-07	-7.39703e-09	1.03385e-05	-4.15213e-11	-7.87608e-05	-7.57139e-12	-1.47725e-06	2.79879e-11	-1.50994e-06	1.12747e-11	7.9797e-12
map-data-2021.01.25-17.48.04.912_1224.jpk-force	1224	1.83594e-06	-9.76562e-07	-7.4277e-09	1.02391e-05	-2.85458e-11	-6.16857e-05	-1.06172e-11	-1.54722e-06	2.14229e-11	-1.55356e-06	3.73736e-12	7.36263e-12
map-data-2021.01.25-17.48.04.912_1225.jpk-force	1225	1.75781e-06	-9.76562e-07	-7.50203e-09	1.05652e-05	1.72103e-11	-5.19142e-05	-1.9206e-11	-1.40169e-06	4.8309e-12	-1.39669e-06	-8.19048e-12	6.68632e-12
map-data-2021.01.25-17.48.04.912_1226.jpk-force	1226	1.67969e-06	-9.76562e-07	-7.51238e-09	1.04616e-05	2.47112e-12	-6.22308e-05	-5.09529e-12	-1.41208e-06	2.12803e-11	-1.39807e-06	1.04658e-11	6.55365e-12
map-data-2021.01.25-17.48.04.912_1227.jpk-force	1227	1.60156e-06	-9.76562e-07	-7.46474e-09	1.05567e-05	5.78285e-11	-2.1561e-05	-2.2395e-11	-1.39532e-06	-3.82309e-12	-1.39999e-06	-1.19546e-11	5.38981e-12
map-data-2021.01.25-17.48.04.912_1228.jpk-force	1228	1.52344e-06	-9.76562e-07	-7.43409e-09	1.0736e-05	-1.97487e-11	-5.9263e-05	-3.94571e-12	-1.40061e-06	1.31839e-11	-1.39661e-06	5.48179e-12	4.80346e-12
map-data-2021.01.25-17.48.04.912_1229.jpk-force	1229	1.44531e-06	-9.76562e-07	-7.37754e-09	1.08544e-05	-2.92004e-11	-7.46958e-05	-1.05182e-11	-1.39237e-06	1.85718e-11	-1.39671e-06	4.62872e-12	7.13608e-12
map-data-2021.01.25-17.48.04.912_1230.jpk-force	1230	1.36719e-06	-9.76562e-07	-7.36423e-09	1.07387e-05	-2.24622e-11	-6.29725e-05	-1.65286e-11	-2.01505e-06	1.74303e-11	-2.01972e-06	-1.04969e-12	7.14245e-12
map-data-2021.01.25-17.48.04.912_1231.jpk-force	1231	1.28906e-06	-9.76562e-07	-7.36159e-09	1.04624e-05	1.01837e-11	-5.3301e-05	-1.57002e-11	-1.76581e-06	1.70079e-11	-1.7598e-06	8.48851e-13	7.4982e-12
map-data-2021.01.25-17.48.04.912_1232.jpk-force	1232	1.21094e-06	-9.76562e-07	-7.3842e-09	1.06061e-05	2.94256e-12	-5.75224e-05	-5.43059e-11	-2.18595e-06	4.86681e-12	-2.12388e-06	-2.1123e-11	1.41971e-11
map-data-2021.01.25-17.48.04.912_1233.jpk-force	1233	1.13281e-06	-9.76562e-07	-7.36956e-09	1.05918e-05	3.7837e-12	-5.74925e-05	-9.62915e-12	-1.84292e-06	1.27673e-11	-1.83591e-06	1.15362e-12	5.78715e-12
map-data-2021.01.25-17.48.04.912_1234.jpk-force	1234	1.05469e-06	-9.76562e-07	-7.3828e-09	1.07743e-05	2.66578e-11	-3.63201e-05	-1.42447e-11	-1.12266e-06	1.7217e-11	-1.10965e-06	3.43938e-13	6.79028e-12
map-data-2021.01.25-17.48.04.912_1235.jpk-force	1235	9.76563e-07	-9.76562e-07	-7.38403e-09	1.06692e-05	-7.02076e-12	-4.70318e-05	-1.5022e-11	-2.21003e-06	2.36299e-11	-2.21837e-06	2.18158e-12	1.16846e-11
map-data-2021.01.25-17.48.04.912_1236.jpk-force	1236	8.98437e-07	-9.76562e-07	-7.36838e-09	1.05815e-05	-9.84903e-12	-5.87364e-05	-1.40569e-11	-2.09348e-06	1.56411e-11	-2.11217e-06	2.67442e-13	6.69706e-12
map-data-2021.01.25-17.48.04.912_1237.jpk-force	1237	8.20312e-07	-9.76562e-07	-7.39535e-09	1.05451e-05	-1.27338e-12	-5.62673e-05	-1.04329e-11	-2.14439e-06	1.03475e-11	-2.13906e-06	-8.80023e-13	6.06758e-12
map-data-2021.01.25-17.48.04.912_1238.jpk-force	1238	7.42187e-07	-9.76562e-07	-7.43427e-09	1.08731e-05	4.95064e-11	-5.56635e-05	-1.65538e-11	-2.14475e-06	1.15411e-11	-2.13574e-06	-2.70136e-12	7.18233e-12
map-data-2021.01.25-17.48.04.912_1239.jpk-force	1239	6.64062e-07	-9.76562e-07	-7.42856e-09	1.10419e-05	3.45367e-11	-4.19175e-05	-8.15041e-12	-2.13163e-06	9.94025e-12	-2.12429e-06	-7.38314e-13	4.45183e-12
map-data-2021.01.25-17.48.04.912_1240.jpk-force	1240	5.85938e-07	-9.76562e-07	-7.37683e-09	1.07704e-05	1.49602e-11	-4.21402e-05	-1.40546e-11	-2.12809e-06	1.89927e-11	-2.13477e-06	2.71098e-12	8.35701e-12
map-data-2021.01.25-17.48.04.912_1241.jpk-force	1241	5.07813e-07	-9.76562e-07	-7.40977e-09	1.09725e-05	2.64781e-11	-4.61787e-05	-1.20386e-11	-2.14246e-06	1.17077e-11	-2.13812e-06	3.01316e-13	6.42114e-12
map-data-2021.01.25-17.48.04.912_1242.jpk-force	1242	4.29687e-07	-9.76562e-07	-7.39712e-09	1.06596e-05	-1.76108e-12	-5.59363e-05	-1.00424e-11	-2.14169e-06	1.45791e-11	-2.12434e-06	1.6966e-12	5.3295e-12
map-data-2021.01.25-17.48.04.912_1243.jpk-force	1243	3.51563e-07	-9.76562e-07	-7.43026e-09	1.0951e-05	1.98794e-11	-5.10176e-05	-4.12035e-11	-1.16858e-06	5.64254e-12	-1.14958e-06	-2.10343e-11	9.09156e-12
map-data-2021.01.25-17.48.04.912_1244.jpk-force	1244	2.73438e-07	-9.76562e-07	-7.43627e-09	1.07618e-05	8.94784e-12	-5.5186e-05	-4.82183e-11	-2.34091e-06	2.10938e-11	-2.2805e-06	-9.93423e-12	1.51282e-11
map-data-2021.01.25-17.48.04.912_1245.jpk-force	1245	1.95312e-07	-9.76562e-07	-7.42028e-09	1.07192e-05	2.44831e-11	-4.57571e-05	-5.84468e-11	-1.90992e-06	6.76546e-12	-1.8899e-06	-3.11263e-11	1.89121e-11
map-data-2021.01.25-17.48.04.912_1246.jpk-force	1246	1.17187e-07	-9.76562e-07	-7.42514e-09	1.07912e-05	1.9763e-11	-5.55784e-05	-1.12514e-11	-1.37465e-06	1.24554e-11	-1.36831e-06	1.50687e-12	6.46066e-12
map-data-2021.01.25-17.48.04.912_1247.jpk-force	1247	3.90618e-08	-9.76562e-07	-7.43249e-09	1.0652e-05	4.74421e-11	-4.02491e-05	-1.6856e-11	-1.37752e-06	9.2287e-12	-1.38152e-06	-5.19405e-13	5.62486e-12
map-data-2021.01.25-17.48.04.912_1248.jpk-force	1248	-3.90623e-08	-9.76562e-07	-7.44246e-09	1.04806e-05	1.85332e-11	-6.40776e-05	-4.98844e-11	-2.45791e-06	9.77448e-12	-2.54301e-06	-2.71385e-11	1.06129e-11
map-data-2021.01.25-17.48.04.912_1249.jpk-force	1249	-1.17187e-07	-9.76562e-07	-7.43019e-09	1.07291e-05	2.86193e-12	-5.62958e-05	-2.61911e-12	-1.98348e-06	1.50384e-11	-1.98782e-06	5.38819e-12	4.39622e-12
map-data-2021.01.25-17.48.04.912_1250.jpk-force	1250	-1.95313e-07	-9.76562e-07	-7.40838e-09	1.04714e-05	8.82434e-15	-6.00633e-05	-5.0416e-11	-2.3673e-06	-2.12157e-12	-2.31824e-06	-2.6626e-11	8.72319e-12
map-data-2021.01.25-17.48.04.912_1251.jpk-force	1251	-2.73438e-07	-9.76562e-07	-7.40262e-09	1.05303e-05	1.22001e-11	-5.32206e-05	-1.82113e-11	-1.72862e-06	1.31072e-11	-1.74763e-06	-3.84473e-13	7.92047e-12
map-data-2021.01.25-17.48.04.912_1252.jpk-force	1252	-3.51563e-07	-9.76562e-07	-7.39587e-09	1.05551e-05	-5.08913e-11	-7.63986e-05	-6.92519e-11	-2.59906e-06	2.08813e-11	-2.54233e-06	-2.7907e-11	2.08898e-11
map-data-2021.01.25-17.48.04.912_1253.jpk-force	1253	-4.29688e-07	-9.76562e-07	-7.43146e-09	1.03106e-05	-8.51616e-11	-0.000107721	-4.83487e-12	-2.53496e-06	6.51729e-11	-2.7585e-06	3.55087e-11	1.20327e-11
map-data-2021.01.25-17.48.04.912_1254.jpk-force	1254	-5.07813e-07	-9.76562e-07	-7.39993e-09	1.04688e-05	3.8137e-12	-4.95864e-05	-5.0157e-11	-1.82058e-06	1.29788e-11	-1.74818e-06	-2.72665e-11	1.35726e-11
map-data-2021.01.25-17.48.04.912_1255.jpk-force	1255	-5.85938e-07	-9.76562e-07	-7.38103e-09	1.04416e-05	2.50702e-11	-4.91266e-05	-7.4156e-12	-1.76621e-06	1.22749e-11	-1.76154e-06	2.64917e-12	5.78591e-12
map-data-2021.01.25-17.48.04.912_1256.jpk-force	1256	-6.64063e-07	-9.76562e-07	-7.45045e-09	1.04724e-05	-1.84872e-11	-7.60982e-05	-1.74201e-11	-2.04374e-06	1.75954e-11	-2.07477e-06	-1.28914e-12	7.47791e-12
map-data-2021.01.25-17.48.04.912_1257.jpk-force	1257	-7.42187e-07	-9.76562e-07	-7.47171e-09	1.01852e-05	3.98065e-11	-2.65689e-05	-2.9604e-12	-2.07882e-06	3.24555e-11	-2.13589e-06	1.3211e-11	7.63144e-12
map-data-2021.01.25-17.48.04.912_1258.jpk-force	1258	-8.20313e-07	-9.76562e-07	-7.40753e-09	9.78159e-06	2.07325e-11	-2.76153e-05	-1.86904e-12	1.72898e-07	2.20529e-11	1.64895e-07	6.7899e-12	7.6813e-12
map-data-2021.01.25-17.48.04.912_1259.jpk-force	1259	-8.98437e-07	-9.76562e-07	-7.38644e-09	1.0039e-05	8.01804e-12	-5.67715e-05	-4.3554e-12	1.70637e-07	2.911e-11	1.66301e-07	1.4303e-11	1.05486e-11
map-data-2021.01.25-17.48.04.912_1260.jpk-force	1260	-9.76563e-07	-9.76562e-07	-7.38478e-09	1.01999e-05	1.75792e-11	-4.57465e-05	-1.35636e-11	6.76199e-08	1.26764e-11	6.32847e-08	-3.60071e-12	8.24623e-12
map-data-2021.01.25-17.48.04.912_1261.jpk-force	1261	-1.05469e-06	-9.76562e-07	-7.35676e-09	1.02687e-05	1.17514e-11	-4.83586e-05	-1.00338e-11	6.60517e-08	8.25595e-12	6.9053e-08	-4.57597e-12	5.21786e-12
map-data-2021.01.25-17.48.04.912_1262.jpk-force	1262	-1.13281e-06	-9.76562e-07	-7.36287e-09	1.02764e-05	1.16172e-12	-5.56589e-05	-3.46746e-11	-2.5602e-06	2.31879e-11	-2.62295e-06	-6.21775e-12	1.11662e-11
map-data-2021.01.25-17.48.04.912_1263.jpk-force	1263	-1.21094e-06	-9.76562e-07	-7.37414e-09	1.04597e-05	-2.8231e-11	-7.50029e-05	-1.58286e-11	-2.6163e-06	2.34006e-11	-2.52953e-06	2.01574e-12	8.44654e-12
map-data-2021.01.25-17.48.04.912_1264.jpk-force	1264	-1.28906e-06	-9.76562e-07	-7.42681e-09	1.04827e-05	-1.28899e-11	-7.28528e-05	-2.58209e-12	-2.5786e-06	3.90391e-11	-2.62031e-06	1.56454e-11	8.40004e-12
map-data-2021.01.25-17.48.04.912_1265.jpk-force	1265	-1.36719e-06	-9.76562e-07	-7.43913e-09	1.00949e-05	-5.22708e-11	-8.41183e-05	-6.79241e-11	-2.5574e-06	5.83729e-12	-2.58977e-06	-2.63658e-11	1.36623e-11
map-data-2021.01.25-17.48.04.912_1266.jpk-force	1266	-1.44531e-06	-9.76562e-07	-7.43533e-09	1.01554e-05	-3.88373e-11	-7.55121e-05	-2.00215e-12	-2.54881e-06	4.42344e-11	-2.62122e-06	1.77808e-11	9.2309e-12
map-data-2021.01.25-17.48.04.912_1267.jpk-force	1267	-1.52344e-06	-9.76562e-07	-7.44551e-09	1.0468e-05	-3.12349e-11	-7.41528e-05	-1.04492e-11	-1.67502e-06	1.18078e-11	-1.67869e-06	2.6548e-12	6.48097e-12
map-data-2021.01.25-17.48.04.912_1268.jpk-force	1268	-1.60156e-06	-9.76562e-07	-7.46409e-09	1.03503e-05	-3.15395e-11	-7.53887e-05	-1.53945e-11	-1.67315e-06	6.84484e-12	-1.66982e-06	-3.40759e-12	6.54176e-12
map-data-2021.01.25-17.48.04.912_1269.jpk-force	1269	-1.67969e-06	-9.76562e-07	-7.44484e-09	1.09494e-05	-2.06286e-11	-6.69561e-05	-2.15551e-12	-1.67185e-06	1.90449e-11	-1.67885e-06	7.41345e-12	6.1812e-12
map-data-2021.01.25-17.48.04.912_1270.jpk-force	1270	-1.75781e-06	-9.76562e-07	-7.46734e-09	1.06778e-05	-3.83524e-11	-7.05443e-05	-1.73536e-11	-1.66335e-06	1.36959e-11	-1.66768e-06	1.8938e-12	8.7759e-12
map-data-2021.01.25-17.48.04.912_1271.jpk-force	1271	-1.83594e-06	-9.76562e-07	-7.40267e-09	1.0432e-05	7.82945e-12	-5.45818e-05	-1.36117e-11	-1.67417e-06	2.30414e-11	-1.66983e-06	3.45089e-12	9.01325e-12
map-data-2021.01.25-17.48.04.912_1272.jpk-force	1272	-1.91406e-06	-9.76562e-07	-7.38823e-09	1.06557e-05	-4.88619e-11	-7.98618e-05	-7.461e-12	-1.66273e-06	2.07872e-11	-1.67007e-06	6.36021e-12	8.61655e-12
map-data-2021.01.25-17.48.04.912_1273.jpk-force	1273	-1.99219e-06	-9.76562e-07	-7.3756e-09	1.06544e-05	1.65779e-11	-4.598e-05	-7.90506e-12	-1.66278e-06	2.00788e-11	-1.66746e-06	7.58141e-12	7.18376e-12
map-data-2021.01.25-17.48.04.912_1274.jpk-force	1274	-2.07031e-06	-9.76562e-07	-7.3871e-09	1.07758e-05	-1.12064e-10	-9.28295e-05	-4.95593e-11	-2.52443e-06	2.54444e-11	-2.48805e-06	-1.687e-11	1.71081e-11
map-data-2021.01.25-17.48.04.912_1275.jpk-force	1275	-2.14844e-06	-9.76562e-07	-7.4196e-09	1.04271e-05	-3.32698e-11	-7.79479e-05	-2.26391e-12	-1.4435e-06	4.93431e-12	-1.45051e-06	1.69584e-12	2.41531e-12
map-data-2021.01.25-17.48.04.912_1276.jpk-force	1276	-2.22656e-06	-9.76562e-07	-7.41887e-09	1.06127e-05	-5.13704e-11	-8.2035e-05	-5.61778e-11	-2.36722e-06	1.33027e-11	-2.2721e-06	-3.02665e-11	1.66748e-11
map-data-2021.01.25-17.48.04.912_1277.jpk-force	1277	-2.30469e-06	-9.76562e-07	-7.45794e-09	1.13933e-05	-3.1047e-11	-6.84744e-05	-6.8309e-13	-1.78128e-06	1.71748e-11	-1.80096e-06	4.91238e-12	3.60884e-12
map-data-2021.01.25-17.48.04.912_1278.jpk-force	1278	-2.38281e-06	-9.76562e-07	-7.44942e-09	1.0995e-05	-3.73699e-11	-7.93525e-05	-1.27693e-11	-1.78115e-06	1.48795e-11	-1.78649e-06	1.25774e-12	7.62434e-12
map-data-2021.01.25-17.48.04.912_1279.jpk-force	1279	-2.46094e-06	-9.76562e-07	-7.44742e-09	1.0412e-05	-7.20901e-11	-0.000102584	-1.73795e-11	-1.79646e-06	1.47325e-11	-1.80113e-06	-2.06241e-12	8.28537e-12
map-data-2021.01.25-17.48.04.912_1280.jpk-force	1280	-2.46094e-06	-8.98437e-07	-7.43011e-09	1.01599e-05	1.76479e-11	-5.67957e-05	-5.36924e-11	-2.01782e-06	1.47461e-11	-2.01048e-06	-2.47932e-11	1.68209e-11
map-data-2021.01.25-17.48.04.912_1281.jpk-force	1281	-2.38281e-06	-8.98437e-07	-7.45106e-09	1.06533e-05	-7.24152e-11	-9.25059e-05	-1.0095e-11	-2.11622e-06	1.32835e-11	-2.1249e-06	-1.73122e-13	5.73176e-12
map-data-2021.01.25-17.48.04.912_1282.jpk-force	1282	-2.30469e-06	-8.98437e-07	-7.43197e-09	1.06609e-05	1.48387e-11	-4.64115e-05	-9.94919e-12	-2.11757e-06	1.50305e-11	-2.11356e-06	4.17268e-12	5.90701e-12
map-data-2021.01.25-17.48.04.912_1283.jpk-force	1283	-2.22656e-06	-8.98437e-07	-7.41762e-09	1.0716e-05	1.41136e-12	-5.32704e-05	-8.26227e-12	-2.13794e-06	1.82657e-11	-2.12693e-06	3.92364e-12	7.13601e-12
map-data-2021.01.25-17.48.04.912_1284.jpk-force	1284	-2.14844e-06	-8.98437e-07	-7.43939e-09	1.0695e-05	9.30247e-12	-5.36842e-05	-3.87844e-12	-2.13517e-06	1.817e-11	-2.10948e-06	6.19454e-12	5.52383e-12
map-data-2021.01.25-17.48.04.912_1285.jpk-force	1285	-2.07031e-06	-8.98437e-07	-7.41611e-09	1.07174e-05	-3.94606e-11	-6.30578e-05	-3.14885e-11	-2.64072e-06	1.63676e-11	-2.60668e-06	-5.97248e-12	1.06523e-11
map-data-2021.01.25-17.48.04.912_1286.jpk-force	1286	-1.99219e-06	-8.98437e-07	-7.42528e-09	1.05111e-05	9.48276e-12	-5.76724e-05	-3.39773e-11	-2.66244e-06	1.5145e-11	-2.6344e-06	-1.06889e-11	1.11439e-11
map-data-2021.01.25-17.48.04.912_1287.jpk-force	1287	-1.91406e-06	-8.98437e-07	-7.43366e-09	1.04741e-05	7.68263e-12	-5.76367e-05	-1.05366e-11	-1.26247e-06	2.06158e-11	-1.24279e-06	1.3166e-12	7.08468e-12
map-data-2021.01.25-17.48.04.912_1288.jpk-force	1288	-1.83594e-06	-8.98437e-07	-7.41241e-09	1.04229e-05	2.14155e-11	-4.89261e-05	-1.58179e-11	-1.25221e-06	1.53637e-11	-1.28256e-06	1.94217e-13	7.02162e-12
map-data-2021.01.25-17.48.04.912_1289.jpk-force	1289	-1.75781e-06	-8.98437e-07	-7.42241e-09	1.06099e-05	7.46309e-11	-1.62005e-05	-1.61368e-11	-1.26059e-06	1.32886e-11	-1.2776e-06	-3.41117e-12	6.55823e-12
map-data-2021.01.25-17.48.04.912_1290.jpk-force	1290	-1.67969e-06	-8.98437e-07	-7.45006e-09	1.0247e-05	-3.43959e-11	-8.13577e-05	-6.69373e-11	-1.91082e-06	7.66914e-12	-1.81438e-06	-2.50611e-11	1.78277e-11
map-data-2021.01.25-17.48.04.912_1291.jpk-force	1291	-1.60156e-06	-8.98437e-07	-7.36431e-09	1.03462e-05	-3.29004e-11	-6.47329e-05	-5.10874e-11	-2.60183e-06	-7.08151e-12	-2.56913e-06	-3.36074e-11	1.01053e-11
map-data-2021.01.25-17.48.04.912_1292.jpk-force	1292	-1.52344e-06	-8.98437e-07	-7.34876e-09	1.00202e-05	-1.97603e-11	-7.56358e-05	-9.67336e-12	-1.65151e-06	1.27705e-11	-1.6425e-06	2.95521e-12	6.84809e-12
map-data-2021.01.25-17.48.04.912_1293.jpk-force	1293	-1.44531e-06	-8.98437e-07	-7.36467e-09	1.02575e-05	-1.84384e-11	-6.15794e-05	-9.76846e-12	-1.92543e-06	1.19023e-11	-1.93077e-06	-5.78578e-13	7.09684e-12
map-data-2021.01.25-17.48.04.912_1294.jpk-force	1294	-1.36719e-06	-8.98437e-07	-7.34516e-09	9.33639e-06	8.01086e-12	-9.20279e-05	-5.98701e-11	-1.2749e-06	1.8764e-11	-1.1007e-06	-2.25928e-11	2.01961e-11
map-data-2021.01.25-17.48.04.912_1295.jpk-force	1295	-1.28906e-06	-8.98437e-07	-7.36367e-09	1.03656e-05	-4.65302e-12	-5.83691e-05	-7.72409e-11	-2.52397e-06	1.32188e-11	-2.37546e-06	-2.93442e-11	1.99476e-11
map-data-2021.01.25-17.48.04.912_1296.jpk-force	1296	-1.21094e-06	-8.98437e-07	-7.38444e-09	9.54907e-06	1.66655e-11	-8.07505e-05	-2.22193e-11	-1.068e-06	2.07853e-11	-1.09936e-06	-3.98478e-13	8.27802e-12
map-data-2021.01.25-17.48.04.912_1297.jpk-force	1297	-1.13281e-06	-8.98437e-07	-7.39637e-09	1.00988e-05	1.06649e-11	-5.82858e-05	-1.58073e-11	-1.09057e-06	1.64078e-11	-1.03321e-06	-1.51797e-12	6.53166e-12
map-data-2021.01.25-17.48.04.912_1298.jpk-force	1298	-1.05469e-06	-8.98437e-07	-7.43137e-09	1.0652e-05	2.10447e-11	-4.69284e-05	-1.6522e-11	-1.06668e-06	1.51009e-11	-1.08569e-06	-3.42945e-12	6.87608e-12
map-data-2021.01.25-17.48.04.912_1299.jpk-force	1299	-9.76563e-07	-8.98437e-07	-7.41036e-09	1.02672e-05	-5.23211e-11	-7.40661e-05	-1.88642e-11	-1.98829e-06	2.19832e-11	-2.00765e-06	1.85501e-12	9.33492e-12
map-data-2021.01.25-17.48.04.912_1300.jpk-force	1300	-8.98437e-07	-8.98437e-07	-7.39505e-09	1.03364e-05	5.62072e-12	-5.30134e-05	-6.03964e-12	-1.69833e-06	2.08326e-11	-1.69333e-06	3.30064e-12	6.57738e-12
map-data-2021.01.25-17.48.04.912_1301.jpk-force	1301	-8.20313e-07	-8.98437e-07	-7.42871e-09	1.0448e-05	3.11633e-11	-4.79295e-05	-1.99246e-11	-1.63767e-06	1.12505e-11	-1.633e-06	-4.43441e-12	8.71694e-12
map-data-2021.01.25-17.48.04.912_1302.jpk-force	1302	-7.42187e-07	-8.98437e-07	-7.41629e-09	1.00543e-05	1.89007e-11	-5.47598e-05	-1.37763e-11	-2.59276e-07	1.39019e-11	-2.52273e-07	-1.51259e-12	9.02836e-12
map-data-2021.01.25-17.48.04.912_1303.jpk-force	1303	-6.64063e-07	-8.98437e-07	-7.40185e-09	1.05949e-05	1.87553e-11	-4.59471e-05	-5.5788e-11	-2.70526e-06	8.21646e-12	-2.64686e-06	-2.17543e-11	1.38896e-11
map-data-2021.01.25-17.48.04.912_1304.jpk-force	1304	-5.85938e-07	-8.98437e-07	-7.38897e-09	1.03084e-05	-1.09753e-11	-5.98783e-05	-1.43065e-11	-2.70702e-06	3.7357e-11	-2.72604e-06	1.24869e-11	1.03294e-11
map-data-2021.01.25-17.48.04.912_1305.jpk-force	1305	-5.07813e-07	-8.98437e-07	-7.35468e-09	1.07724e-05	-1.77549e-11	-5.58068e-05	-4.4036e-12	-1.50122e-06	9.25098e-12	-1.51356e-06	1.77782e-12	3.18777e-12
map-data-2021.01.25-17.48.04.912_1306.jpk-force	1306	-4.29688e-07	-8.98437e-07	-7.35023e-09	1.03049e-05	2.10857e-11	-4.65104e-05	-5.88733e-11	-1.81863e-06	1.70711e-11	-1.75957e-06	-1.61285e-11	2.14814e-11
map-data-2021.01.25-17.48.04.912_1307.jpk-force	1307	-3.51563e-07	-8.98437e-07	-7.32807e-09	1.0259e-05	-6.0847e-12	-4.70615e-05	-2.76109e-11	-9.31337e-07	1.14753e-11	-1.01837e-06	-9.50892e-12	8.03229e-12
map-data-2021.01.25-17.48.04.912_1308.jpk-force	1308	-2.73438e-07	-8.98437e-07	-7.37794e-09	1.02986e-05	-7.68935e-12	-7.02128e-05	-1.23827e-11	-1.00026e-06	1.62134e-11	-9.28229e-07	7.6874e-13	6.21827e-12
map-data-2021.01.25-17.48.04.912_1309.jpk-force	1309	-1.95313e-07	-8.98437e-07	-7.34498e-09	1.04763e-05	-4.30834e-12	-5.82509e-05	-6.56889e-12	-9.64048e-07	2.66689e-11	-9.96728e-07	1.08682e-11	6.67953e-12
map-data-2021.01.25-17.48.04.912_1310.jpk-force	1310	-1.17188e-07	-8.98437e-07	-7.35653e-09	1.04025e-05	-1.47226e-11	-7.03548e-05	-8.82511e-12	-1.01408e-06	3.95724e-11	-9.27375e-07	1.17345e-11	8.02752e-12
map-data-2021.01.25-17.48.04.912_1311.jpk-force	1311	-3.90635e-08	-8.98437e-07	-7.37051e-09	1.05038e-05	-5.19354e-12	-6.26809e-05	-4.60745e-11	-2.70637e-06	2.4829e-11	-2.68502e-06	-7.95818e-12	1.92854e-11
map-data-2021.01.25-17.48.04.912_1312.jpk-force	1312	3.90618e-08	-8.98437e-07	-7.33766e-09	1.06762e-05	4.4298e-12	-6.00464e-05	-6.23499e-11	-2.7214e-06	2.47256e-11	-2.64365e-06	-2.11604e-11	2.84155e-11
map-data-2021.01.25-17.48.04.912_1313.jpk-force	1313	1.17188e-07	-8.98437e-07	-7.34785e-09	1.08027e-05	2.69121e-11	-5.49351e-05	-1.77606e-11	-1.99987e-06	1.32282e-11	-2.00721e-06	-1.04558e-12	7.59044e-12
map-data-2021.01.25-17.48.04.912_1314.jpk-force	1314	1.95312e-07	-8.98437e-07	-7.36462e-09	1.06421e-05	9.95341e-12	-5.66074e-05	-1.58276e-11	-2.00072e-06	1.02872e-11	-2.02007e-06	-3.9189e-12	6.91104e-12
map-data-2021.01.25-17.48.04.912_1315.jpk-force	1315	2.73438e-07	-8.98437e-07	-7.42611e-09	1.18563e-05	7.50541e-12	-5.11394e-05	-1.4437e-11	-1.92322e-06	1.70913e-11	-1.94191e-06	1.44105e-12	7.83813e-12
map-data-2021.01.25-17.48.04.912_1316.jpk-force	1316	3.51562e-07	-8.98437e-07	-7.36867e-09	1.09514e-05	4.3465e-12	-6.11214e-05	-1.96567e-11	-1.91001e-06	2.06134e-11	-1.9297e-06	1.23505e-12	9.52195e-12
map-data-2021.01.25-17.48.04.912_1317.jpk-force	1317	4.29686e-07	-8.98437e-07	-7.35429e-09	1.11071e-05	-7.55984e-12	-5.4087e-05	-1.46311e-11	-1.90873e-06	1.78871e-11	-1.90406e-06	-6.60649e-13	8.98782e-12
map-data-2021.01.25-17.48.04.912_1318.jpk-force	1318	5.07812e-07	-8.98437e-07	-7.38363e-09	1.10258e-05	2.08922e-11	-5.40805e-05	-1.29027e-11	-1.93458e-06	2.00313e-11	-1.92924e-06	3.24332e-12	6.75919e-12
map-data-2021.01.25-17.48.04.912_1319.jpk-force	1319	5.85936e-07	-8.98437e-07	-7.41702e-09	1.08656e-05	1.27875e-11	-5.19762e-05	-1.22492e-11	-1.91015e-06	1.40515e-11	-1.9305e-06	2.25652e-12	6.04649e-12
map-data-2021.01.25-17.48.04.912_1320.jpk-force	1320	6.64062e-07	-8.98437e-07	-7.41765e-09	1.06386e-05	-2.61016e-12	-6.54465e-05	-5.1536e-11	-2.75318e-06	2.49934e-11	-2.83827e-06	-8.10941e-12	1.55821e-11
map-data-2021.01.25-17.48.04.912_1321.jpk-force	1321	7.42187e-07	-8.98437e-07	-7.40551e-09	1.02564e-05	1.74896e-11	-4.97846e-05	-1.82993e-11	-1.36415e-06	1.32047e-11	-1.37182e-06	-4.64581e-13	8.5269e-12
map-data-2021.01.25-17.48.04.912_1322.jpk-force	1322	8.20312e-07	-8.98437e-07	-7.36572e-09	1.0155e-05	-1.34432e-11	-6.13748e-05	-1.7096e-11	-1.37451e-06	1.02271e-11	-1.36384e-06	-2.85154e-12	7.70623e-12
map-data-2021.01.25-17.48.04.912_1323.jpk-force	1323	8.98437e-07	-8.98437e-07	-7.33244e-09	9.30243e-06	8.92741e-12	-6.37166e-05	-5.07567e-11	-1.09318e-06	1.71761e-11	-1.07215e-06	-2.35542e-11	1.80923e-11
map-data-2021.01.25-17.48.04.912_1324.jpk-force	1324	9.76562e-07	-8.98437e-07	-7.33742e-09	1.02005e-05	1.03496e-11	-5.21375e-05	-1.13929e-11	-1.14527e-06	9.64142e-12	-1.13493e-06	-6.09657e-13	6.10037e-12
map-data-2021.01.25-17.48.04.912_1325.jpk-force	1325	1.05469e-06	-8.98437e-07	-7.35839e-09	1.04597e-05	5.82909e-11	-3.16263e-05	-1.90758e-11	-1.75296e-06	2.10851e-11	-1.7613e-06	-1.9487e-12	7.93089e-12
map-data-2021.01.25-17.48.04.912_1326.jpk-force	1326	1.13281e-06	-8.98437e-07	-7.36639e-09	1.04718e-05	7.73209e-12	-6.40046e-05	-1.68858e-11	-1.72968e-06	2.03141e-11	-1.74736e-06	4.47879e-13	8.40919e-12
map-data-2021.01.25-17.48.04.912_1327.jpk-force	1327	1.21094e-06	-8.98437e-07	-7.35877e-09	1.06055e-05	1.11435e-11	-5.31576e-05	-4.66179e-11	-2.41821e-06	1.30559e-11	-2.46093e-06	-1.37405e-11	1.44467e-11
map-data-2021.01.25-17.48.04.912_1328.jpk-force	1328	1.28906e-06	-8.98437e-07	-7.37681e-09	1.1388e-05	1.45135e-11	-4.61472e-05	-8.1816e-12	-2.45619e-06	3.2938e-11	-2.48757e-06	1.36606e-11	8.37896e-12
map-data-2021.01.25-17.48.04.912_1329.jpk-force	1329	1.36719e-06	-8.98437e-07	-7.38237e-09	1.16131e-05	5.92418e-12	-5.5029e-05	-5.68628e-11	-1.76766e-06	1.41038e-11	-1.68226e-06	-1.89701e-11	1.96448e-11
map-data-2021.01.25-17.48.04.912_1330.jpk-force	1330	1.44531e-06	-8.98437e-07	-7.35908e-09	1.09355e-05	1.35292e-11	-5.56211e-05	-1.48254e-11	-1.65194e-06	1.66776e-11	-1.7607e-06	1.20279e-12	6.97733e-12
map-data-2021.01.25-17.48.04.912_1331.jpk-force	1331	1.52344e-06	-8.98437e-07	-7.33416e-09	1.03821e-05	-2.54003e-11	-7.21695e-05	-5.14643e-11	-2.39067e-06	2.6829e-11	-2.2258e-06	-1.0183e-11	1.61184e-11
map-data-2021.01.25-17.48.04.912_1332.jpk-force	1332	1.60156e-06	-8.98437e-07	-7.34652e-09	1.01559e-05	2.38239e-11	-6.55666e-05	-1.29892e-11	-1.20752e-06	1.43288e-11	-1.22453e-06	1.88707e-12	6.08387e-12
map-data-2021.01.25-17.48.04.912_1333.jpk-force	1333	1.67969e-06	-8.98437e-07	-7.35909e-09	1.07555e-05	-1.48925e-11	-6.63203e-05	-5.04073e-11	-2.67987e-06	1.08835e-11	-2.7366e-06	-1.20942e-11	1.12551e-11
map-data-2021.01.25-17.48.04.912_1334.jpk-force	1334	1.75781e-06	-8.98437e-07	-7.3437e-09	1.04477e-05	-2.59862e-11	-7.20241e-05	-4.92065e-11	-2.53638e-06	2.51667e-11	-2.47697e-06	-1.3061e-11	1.7832e-11
map-data-2021.01.25-17.48.04.912_1335.jpk-force	1335	1.83594e-06	-8.98437e-07	-7.34788e-09	1.0664e-05	-1.08452e-11	-6.92528e-05	-1.83266e-11	-2.46863e-06	1.94955e-11	-2.53071e-06	3.45911e-12	7.2946e-12
map-data-2021.01.25-17.48.04.912_1336.jpk-force	1336	1.91406e-06	-8.98437e-07	-7.36306e-09	1.07305e-05	2.57623e-11	-5.1339e-05	-1.91011e-11	-2.54762e-06	1.67081e-11	-2.56731e-06	4.39841e-13	7.21353e-12
map-data-2021.01.25-17.48.04.912_1337.jpk-force	1337	1.99219e-06	-8.98437e-07	-7.35992e-09	1.0587e-05	4.31118e-11	-4.64912e-05	-8.68028e-13	-2.50569e-06	4.30965e-11	-2.55174e-06	1.91908e-11	9.03377e-12
map-data-2021.01.25-17.48.04.912_1338.jpk-force	1338	2.07031e-06	-8.98437e-07	-7.3244e-09	1.04322e-05	-8.11364e-12	-6.011e-05	-4.86293e-11	-1.54568e-06	2.49268e-11	-1.46263e-06	-1.77816e-11	1.58316e-11
map-data-2021.01.25-17.48.04.912_1339.jpk-force	1339	2.14844e-06	-8.98437e-07	-7.31666e-09	1.02628e-05	1.59135e-11	-5.65495e-05	-5.83654e-11	-7.79077e-07	1.28684e-11	-7.22053e-07	-3.89869e-11	1.14204e-11
map-data-2021.01.25-17.48.04.912_1340.jpk-force	1340	2.22656e-06	-8.98437e-07	-7.36764e-09	1.04825e-05	2.12661e-12	-5.65516e-05	-1.87168e-11	-1.02207e-06	1.2022e-11	-1.00606e-06	-3.76572e-12	9.74907e-12
map-data-2021.01.25-17.48.04.912_1341.jpk-force	1341	2.30469e-06	-8.98437e-07	-7.35136e-09	1.05116e-05	5.09065e-11	-8.20578e-06	-4.2187e-12	-1.01673e-06	2.08275e-11	-1.00639e-06	5.78261e-12	7.01592e-12
map-data-2021.01.25-17.48.04.912_1342.jpk-force	1342	2.38281e-06	-8.98437e-07	-7.34025e-09	1.04775e-05	1.12229e-11	-4.37256e-05	-4.26109e-11	-1.79551e-06	2.21801e-11	-1.64208e-06	-9.08956e-12	1.7056e-11
map-data-2021.01.25-17.48.04.912_1343.jpk-force	1343	2.46094e-06	-8.98437e-07	-7.32542e-09	1.04448e-05	-3.68628e-12	-5.85356e-05	-1.64497e-11	-1.71433e-06	2.50864e-11	-1.73168e-06	1.01485e-13	8.13084e-12
map-data-2021.01.25-17.48.04.912_1344.jpk-force	1344	2.46094e-06	-8.20312e-07	-7.33494e-09	1.04937e-05	1.11329e-11	-5.53268e-05	-1.86079e-11	-1.7148e-06	1.63485e-11	-1.69545e-06	-7.21988e-13	7.90629e-12
map-data-2021.01.25-17.48.04.912_1345.jpk-force	1345	2.38281e-06	-8.20312e-07	-7.30981e-09	9.64629e-06	1.6394e-11	-4.86668e-05	-1.46458e-11	-4.66037e-07	1.87229e-11	-4.61034e-07	6.97362e-13	7.64819e-12
map-data-2021.01.25-17.48.04.912_1346.jpk-force	1346	2.30469e-06	-8.20312e-07	-7.36237e-09	1.06812e-05	5.26009e-11	-2.63005e-05	-2.25493e-11	-8.18036e-07	1.43312e-11	-8.49382e-07	-3.16734e-12	7.74544e-12
map-data-2021.01.25-17.48.04.912_1347.jpk-force	1347	2.22656e-06	-8.20312e-07	-7.33589e-09	1.06222e-05	1.40841e-11	-4.9858e-05	-6.2692e-12	-9.08795e-07	1.63781e-11	-9.0346e-07	9.73601e-13	5.41497e-12
map-data-2021.01.25-17.48.04.912_1348.jpk-force	1348	2.14844e-06	-8.20312e-07	-7.33141e-09	1.0391e-05	1.64774e-11	-4.95862e-05	-1.23074e-11	-8.97743e-07	1.73139e-11	-8.93074e-07	-1.2588e-12	7.11128e-12
map-data-2021.01.25-17.48.04.912_1349.jpk-force	1349	2.07031e-06	-8.20312e-07	-7.33509e-09	1.05898e-05	1.42006e-11	-5.17365e-05	-1.31361e-11	-9.1013e-07	1.85859e-11	-9.03794e-07	3.23684e-13	7.66686e-12
map-data-2021.01.25-17.48.04.912_1350.jpk-force	1350	1.99219e-06	-8.20312e-07	-7.33301e-09	1.06121e-05	1.89309e-11	-3.4407e-05	-1.00473e-11	-8.93318e-07	8.39169e-12	-8.8965e-07	-1.16346e-12	5.05475e-12
map-data-2021.01.25-17.48.04.912_1351.jpk-force	1351	1.91406e-06	-8.20312e-07	-7.33119e-09	1.06348e-05	1.20321e-11	-5.03448e-05	-1.80751e-11	-9.6462e-07	1.28952e-11	-9.46946e-07	8.97812e-13	7.47482e-12
map-data-2021.01.25-17.48.04.912_1352.jpk-force	1352	1.83594e-06	-8.20312e-07	-7.34923e-09	1.07476e-05	1.10163e-11	-5.75683e-05	-1.46347e-11	-9.50754e-07	1.85295e-11	-9.70095e-07	-3.21952e-13	7.11538e-12
map-data-2021.01.25-17.48.04.912_1353.jpk-force	1353	1.75781e-06	-8.20312e-07	-7.36685e-09	1.08199e-05	8.36943e-12	-5.21856e-05	-1.46255e-11	-9.60881e-07	1.63135e-11	-9.69218e-07	-1.01575e-12	6.41541e-12
map-data-2021.01.25-17.48.04.912_1354.jpk-force	1354	1.67969e-06	-8.20312e-07	-7.36129e-09	1.07017e-05	1.78535e-11	-5.03204e-05	-9.25329e-12	-9.57766e-07	2.29229e-11	-9.4176e-07	1.51756e-12	6.76257e-12
map-data-2021.01.25-17.48.04.912_1355.jpk-force	1355	1.60156e-06	-8.20312e-07	-7.40411e-09	1.071e-05	2.1968e-12	-9.08392e-05	-1.27683e-11	-9.62661e-07	1.27669e-11	-9.44653e-07	2.91027e-12	5.90277e-12
map-data-2021.01.25-17.48.04.912_1356.jpk-force	1356	1.52344e-06	-8.20312e-07	-7.3672e-09	1.07651e-05	1.51801e-11	-4.62667e-05	-1.59691e-11	-9.35802e-07	2.04827e-11	-9.65816e-07	2.69298e-12	8.99836e-12
map-data-2021.01.25-17.48.04.912_1357.jpk-force	1357	1.44531e-06	-8.20312e-07	-7.35726e-09	1.07924e-05	2.04551e-13	-7.37904e-05	-9.81295e-12	-9.65267e-07	1.17082e-11	-9.36589e-07	3.333e-14	4.92653e-12
map-data-2021.01.25-17.48.04.912_1358.jpk-force	1358	1.36719e-06	-8.20312e-07	-7.36986e-09	1.07612e-05	1.74801e-11	-4.83756e-05	-1.63501e-11	-9.48807e-07	1.11646e-11	-9.43471e-07	-3.82308e-12	6.34078e-12
map-data-2021.01.25-17.48.04.912_1359.jpk-force	1359	1.28906e-06	-8.20312e-07	-7.36285e-09	1.08034e-05	1.5814e-11	-4.5823e-05	-1.50603e-11	-9.70953e-07	1.53325e-11	-9.42274e-07	-6.15287e-14	7.63785e-12
map-data-2021.01.25-17.48.04.912_1360.jpk-force	1360	1.21094e-06	-8.20312e-07	-7.36213e-09	1.08818e-05	-5.69603e-12	-5.9341e-05	-5.17251e-11	-2.39046e-06	1.54288e-11	-2.34841e-06	-2.85519e-11	1.764e-11
map-data-2021.01.25-17.48.04.912_1361.jpk-force	1361	1.13281e-06	-8.20312e-07	-7.36243e-09	1.0955e-05	1.31769e-11	-4.97422e-05	-1.99108e-11	-2.37892e-06	2.87938e-11	-2.38426e-06	2.13486e-12	9.74791e-12
map-data-2021.01.25-17.48.04.912_1362.jpk-force	1362	1.05469e-06	-8.20312e-07	-7.3647e-09	1.08184e-05	7.48034e-12	-5.52485e-05	-6.82488e-11	-2.29704e-06	2.26764e-11	-2.13451e-06	-3.67625e-11	2.25713e-11
map-data-2021.01.25-17.48.04.912_1363.jpk-force	1363	9.76563e-07	-8.20312e-07	-7.36462e-09	9.69786e-06	3.68707e-11	-3.70555e-05	-3.66174e-11	3.33594e-08	2.63519e-11	8.20488e-08	-2.9862e-12	1.78945e-11
map-data-2021.01.25-17.48.04.912_1364.jpk-force	1364	8.98437e-07	-8.20312e-07	-7.34474e-09	1.01446e-05	1.33518e-11	-7.56767e-05	-1.47675e-11	6.79875e-08	1.94721e-11	3.49734e-08	1.82355e-12	8.66177e-12
map-data-2021.01.25-17.48.04.912_1365.jpk-force	1365	8.20312e-07	-8.20312e-07	-7.36043e-09	1.09285e-05	8.74966e-12	-5.60807e-05	-5.73859e-12	6.73746e-08	2.58223e-11	6.03719e-08	7.48406e-12	6.51715e-12
map-data-2021.01.25-17.48.04.912_1366.jpk-force	1366	7.42187e-07	-8.20312e-07	-7.35797e-09	1.08174e-05	1.00615e-11	-6.11497e-05	-8.88738e-12	1.30951e-08	2.51465e-11	8.54615e-08	1.01127e-11	7.57379e-12
map-data-2021.01.25-17.48.04.912_1367.jpk-force	1367	6.64062e-07	-8.20312e-07	-7.38748e-09	1.11037e-05	2.47458e-11	-6.18958e-05	-7.79185e-12	-6.84769e-07	2.51305e-12	-6.90771e-07	-2.12036e-12	2.97703e-12
map-data-2021.01.25-17.48.04.912_1368.jpk-force	1368	5.85938e-07	-8.20312e-07	-7.34752e-09	1.07721e-05	1.59919e-11	-4.19518e-05	-1.48918e-11	-6.86103e-07	6.34985e-12	-6.90772e-07	-6.84114e-12	6.17636e-12
map-data-2021.01.25-17.48.04.912_1369.jpk-force	1369	5.07813e-07	-8.20312e-07	-7.38814e-09	1.13802e-05	7.14771e-12	-5.65361e-05	-8.08984e-12	-6.90242e-07	2.33814e-12	-6.88574e-07	-2.80938e-12	3.61432e-12
map-data-2021.01.25-17.48.04.912_1370.jpk-force	1370	4.29687e-07	-8.20312e-07	-7.38828e-09	1.12383e-05	1.49032e-11	-4.99919e-05	-5.20337e-11	-1.83169e-06	7.27702e-12	-1.802e-06	-1.7644e-11	1.82908e-11
map-data-2021.01.25-17.48.04.912_1371.jpk-force	1371	3.51563e-07	-8.20312e-07	-7.38371e-09	1.13039e-05	6.37664e-12	-5.571e-05	-2.42513e-11	-1.60124e-06	1.04355e-11	-1.62058e-06	-8.12829e-12	6.31511e-12
map-data-2021.01.25-17.48.04.912_1372.jpk-force	1372	2.73438e-07	-8.20312e-07	-7.39518e-09	1.13165e-05	1.5977e-11	-5.1258e-05	-1.32112e-11	-1.87247e-06	5.56093e-12	-1.86446e-06	-1.71479e-12	5.51562e-12
map-data-2021.01.25-17.48.04.912_1373.jpk-force	1373	1.95312e-07	-8.20312e-07	-7.37946e-09	1.13833e-05	1.67673e-11	-4.74378e-05	-1.62194e-11	-2.00233e-06	1.74574e-11	-2.02134e-06	2.17021e-12	7.15441e-12
map-data-2021.01.25-17.48.04.912_1374.jpk-force	1374	1.17187e-07	-8.20312e-07	-7.36718e-09	1.13973e-05	2.1548e-11	-4.49477e-05	-7.19138e-11	-2.32723e-06	8.88299e-12	-2.32223e-06	-3.335e-11	1.48087e-11
map-data-2021.01.25-17.48.04.912_1375.jpk-force	1375	3.90618e-08	-8.20312e-07	-7.35115e-09	1.13799e-05	1.91516e-11	-3.16053e-05	-5.41013e-11	-1.87434e-06	1.0276e-11	-1.85365e-06	-2.98513e-11	1.60871e-11
map-data-2021.01.25-17.48.04.912_1376.jpk-force	1376	-3.90623e-08	-8.20312e-07	-7.35393e-09	1.09047e-05	1.19675e-11	-5.05396e-05	-3.96096e-11	-8.57631e-07	2.06265e-11	-8.25618e-07	-1.90607e-11	1.37796e-11
map-data-2021.01.25-17.48.04.912_1377.jpk-force	1377	-1.17187e-07	-8.20312e-07	-7.35857e-09	1.09456e-05	-6.42237e-12	-5.87146e-05	-1.2645e-11	-1.89872e-06	1.29429e-11	-1.89205e-06	-9.32236e-13	7.66111e-12
map-data-2021.01.25-17.48.04.912_1378.jpk-force	1378	-1.95313e-07	-8.20312e-07	-7.37472e-09	1.10372e-05	8.23797e-12	-5.12869e-05	-4.81052e-11	-2.58402e-06	7.18575e-13	-2.64643e-06	-2.62349e-11	1.14194e-11
map-data-2021.01.25-17.48.04.912_1379.jpk-force	1379	-2.73438e-07	-8.20312e-07	-7.36618e-09	1.00005e-05	1.36447e-11	-6.05291e-05	-1.30373e-12	-6.61221e-07	1.71329e-11	-6.64556e-07	5.22058e-12	5.63637e-12
map-data-2021.01.25-17.48.04.912_1380.jpk-force	1380	-3.51563e-07	-8.20312e-07	-7.3494e-09	1.08772e-05	1.08865e-11	-5.38208e-05	-5.64026e-11	-1.36566e-06	9.90029e-12	-1.33131e-06	-3.30361e-11	1.97335e-11
map-data-2021.01.25-17.48.04.912_1381.jpk-force	1381	-4.29688e-07	-8.20312e-07	-7.34677e-09	1.08544e-05	1.16159e-11	-4.40131e-05	-1.21888e-11	-1.35134e-06	2.28421e-11	-1.346e-06	2.71919e-12	8.67792e-12
map-data-2021.01.25-17.48.04.912_1382.jpk-force	1382	-5.07813e-07	-8.20312e-07	-7.35452e-09	9.84999e-06	6.43812e-11	-4.82123e-05	-6.62396e-11	6.78905e-08	5.46211e-12	1.05573e-07	-3.60071e-11	1.99609e-11
map-data-2021.01.25-17.48.04.912_1383.jpk-force	1383	-5.85938e-07	-8.20312e-07	-7.34937e-09	1.00978e-05	4.32668e-11	-5.00352e-05	-1.14013e-11	-6.12218e-07	1.71085e-11	-6.2089e-07	3.43308e-12	7.32274e-12
map-data-2021.01.25-17.48.04.912_1384.jpk-force	1384	-6.64063e-07	-8.20312e-07	-7.38431e-09	1.10458e-05	2.50034e-11	-5.6309e-05	-1.90641e-11	-7.25921e-07	3.01814e-12	-7.34925e-07	-3.3699e-12	5.87165e-12
map-data-2021.01.25-17.48.04.912_1385.jpk-force	1385	-7.42187e-07	-8.20312e-07	-7.37444e-09	1.03534e-05	2.13874e-11	-9.86938e-05	-1.3741e-11	-7.28612e-07	1.44248e-11	-7.34282e-07	-1.39823e-12	9.95915e-12
map-data-2021.01.25-17.48.04.912_1386.jpk-force	1386	-8.20313e-07	-8.20312e-07	-7.38028e-09	1.12639e-05	2.1682e-11	-4.41522e-05	-1.09618e-11	-1.41557e-06	1.96513e-11	-1.4059e-06	4.37391e-12	8.18038e-12
map-data-2021.01.25-17.48.04.912_1387.jpk-force	1387	-8.98437e-07	-8.20312e-07	-7.37295e-09	1.09407e-05	3.39488e-11	-4.60145e-05	-4.28689e-11	8.00919e-08	1.10652e-11	9.8434e-08	-1.36592e-11	1.06737e-11
map-data-2021.01.25-17.48.04.912_1388.jpk-force	1388	-9.76563e-07	-8.20312e-07	-7.36341e-09	1.09538e-05	9.04642e-12	-4.71066e-05	-1.5155e-11	5.93509e-08	2.7532e-11	2.60039e-08	7.08765e-12	7.86801e-12
map-data-2021.01.25-17.48.04.912_1389.jpk-force	1389	-1.05469e-06	-8.20312e-07	-7.35589e-09	1.08176e-05	1.04532e-11	-5.11538e-05	-1.53482e-11	4.9295e-08	2.54826e-11	8.36434e-08	4.92262e-12	7.47241e-12
map-data-2021.01.25-17.48.04.912_1390.jpk-force	1390	-1.13281e-06	-8.20312e-07	-7.37267e-09	1.09931e-05	3.07524e-11	-1.93064e-05	-1.58741e-11	-4.92032e-07	2.29654e-11	-5.09707e-07	-9.71907e-14	7.75451e-12
map-data-2021.01.25-17.48.04.912_1391.jpk-force	1391	-1.21094e-06	-8.20312e-07	-7.3947e-09	1.10353e-05	1.97699e-11	-4.74754e-05	-1.12218e-11	-5.05216e-07	2.01617e-11	-4.85541e-07	1.67413e-12	6.95161e-12
map-data-2021.01.25-17.48.04.912_1392.jpk-force	1392	-1.28906e-06	-8.20312e-07	-7.36798e-09	1.09118e-05	2.06981e-11	-5.01113e-05	-4.12304e-11	-8.07372e-07	1.68062e-11	-7.0833e-07	-1.28129e-11	1.10795e-11
map-data-2021.01.25-17.48.04.912_1393.jpk-force	1393	-1.36719e-06	-8.20312e-07	-7.36637e-09	1.03446e-05	4.08301e-11	-4.36419e-05	-5.57055e-11	7.80715e-08	1.9584e-11	1.37432e-07	-2.0122e-11	1.82382e-11
map-data-2021.01.25-17.48.04.912_1394.jpk-force	1394	-1.44531e-06	-8.20312e-07	-7.36566e-09	1.08838e-05	1.14872e-11	-4.01477e-05	-1.91507e-11	2.07516e-07	1.80375e-11	9.61478e-08	-2.22087e-13	7.64898e-12
map-data-2021.01.25-17.48.04.912_1395.jpk-force	1395	-1.52344e-06	-8.20312e-07	-7.36001e-09	1.10589e-05	-3.44379e-12	-5.97368e-05	-9.55566e-12	-1.39496e-06	2.73508e-12	-1.39696e-06	-1.76218e-12	3.79618e-12
map-data-2021.01.25-17.48.04.912_1396.jpk-force	1396	-1.60156e-06	-8.20312e-07	-7.36533e-09	1.11422e-05	3.69592e-11	-3.93057e-05	-5.38224e-12	-1.39157e-06	1.25576e-11	-1.39458e-06	6.59129e-12	4.60594e-12
map-data-2021.01.25-17.48.04.912_1397.jpk-force	1397	-1.67969e-06	-8.20312e-07	-7.37556e-09	1.08604e-05	5.70626e-12	-5.80802e-05	-1.60683e-11	-9.09785e-07	8.04351e-12	-9.06116e-07	-1.36576e-12	6.30957e-12
map-data-2021.01.25-17.48.04.912_1398.jpk-force	1398	-1.75781e-06	-8.20312e-07	-7.39514e-09	1.1147e-05	-5.33371e-12	-6.40986e-05	-4.26119e-11	-2.05675e-06	2.12151e-13	-2.05141e-06	-1.89966e-11	9.58064e-12
map-data-2021.01.25-17.48.04.912_1399.jpk-force	1399	-1.83594e-06	-8.20312e-07	-7.42175e-09	1.11077e-05	-6.55606e-11	-0.000105238	-5.45281e-11	-2.62626e-06	1.45274e-11	-2.55317e-06	-2.59987e-11	1.8721e-11
map-data-2021.01.25-17.48.04.912_1400.jpk-force	1400	-1.91406e-06	-8.20312e-07	-7.39219e-09	1.11529e-05	6.41577e-12	-5.89554e-05	-1.57332e-11	-2.08775e-06	1.23439e-11	-2.08275e-06	1.24469e-12	7.37788e-12
map-data-2021.01.25-17.48.04.912_1401.jpk-force	1401	-1.99219e-06	-8.20312e-07	-7.40192e-09	1.10493e-05	1.36375e-11	-5.12232e-05	-4.41903e-11	-1.22903e-06	9.68647e-12	-1.17333e-06	-1.77965e-11	1.50338e-11
map-data-2021.01.25-17.48.04.912_1402.jpk-force	1402	-2.07031e-06	-8.20312e-07	-7.49851e-09	1.06002e-05	5.24669e-11	-6.8772e-05	-1.68901e-11	-8.32016e-07	1.71778e-11	-8.13342e-07	-2.06865e-13	7.35906e-12
map-data-2021.01.25-17.48.04.912_1403.jpk-force	1403	-2.14844e-06	-8.20312e-07	-7.46777e-09	1.1272e-05	2.76435e-11	-2.22696e-05	-5.40356e-11	-1.39143e-06	2.53358e-11	-1.35942e-06	-2.79223e-11	1.95641e-11
map-data-2021.01.25-17.48.04.912_1404.jpk-force	1404	-2.22656e-06	-8.20312e-07	-7.45755e-09	1.09644e-05	1.22639e-11	-5.42068e-05	-6.28612e-12	-5.58446e-07	1.08499e-11	-5.7412e-07	3.32248e-12	4.39424e-12
map-data-2021.01.25-17.48.04.912_1405.jpk-force	1405	-2.30469e-06	-8.20312e-07	-7.42438e-09	1.14515e-05	2.52583e-11	-3.51084e-05	-1.82623e-11	-2.08365e-06	1.8092e-11	-2.04862e-06	-2.15208e-14	7.28848e-12
map-data-2021.01.25-17.48.04.912_1406.jpk-force	1406	-2.38281e-06	-8.20312e-07	-7.40224e-09	1.09127e-05	2.11319e-11	-4.78821e-05	-1.44565e-11	-2.09352e-06	1.78846e-11	-2.05714e-06	1.62871e-12	6.86399e-12
map-data-2021.01.25-17.48.04.912_1407.jpk-force	1407	-2.46094e-06	-8.20312e-07	-7.37952e-09	1.0575e-05	7.80666e-12	-5.23798e-05	-4.77062e-11	-1.97373e-06	1.66876e-11	-1.88496e-06	-1.46247e-11	1.61732e-11
map-data-2021.01.25-17.48.04.912_1408.jpk-force	1408	-2.46094e-06	-7.42187e-07	-7.39166e-09	1.07299e-05	1.83146e-11	-5.32876e-05	-3.3598e-11	-1.2482e-06	2.5508e-11	-1.2005e-06	-9.3437e-12	1.10326e-11
map-data-2021.01.25-17.48.04.912_1409.jpk-force	1409	-2.38281e-06	-7.42187e-07	-7.39545e-09	1.11117e-05	2.37462e-11	-3.35289e-05	-1.39092e-11	-1.24917e-06	1.07697e-11	-1.25418e-06	-1.2771e-12	5.6973e-12
map-data-2021.01.25-17.48.04.912_1410.jpk-force	1410	-2.30469e-06	-7.42187e-07	-7.38165e-09	1.11025e-05	1.92286e-11	-3.24342e-05	-1.81424e-11	-1.24785e-06	1.60792e-11	-1.24385e-06	-1.71065e-12	7.62053e-12
map-data-2021.01.25-17.48.04.912_1411.jpk-force	1411	-2.22656e-06	-7.42187e-07	-7.38834e-09	1.10297e-05	1.29378e-11	-4.4077e-05	-4.69588e-12	-1.1458e-07	1.11113e-11	-1.09578e-07	2.69976e-12	5.6395e-12
map-data-2021.01.25-17.48.04.912_1412.jpk-force	1412	-2.14844e-06	-7.42187e-07	-7.33295e-09	1.03758e-05	2.95989e-11	-2.95347e-05	-2.0429e-11	-1.16811e-07	5.27355e-12	-1.07807e-07	-1.02199e-11	8.68183e-12
map-data-2021.01.25-17.48.04.912_1413.jpk-force	1413	-2.07031e-06	-7.42187e-07	-7.3448e-09	1.04613e-05	1.63566e-11	-6.76796e-06	-1.3005e-11	-1.11894e-07	1.80615e-11	-1.06892e-07	4.57475e-12	9.37864e-12
map-data-2021.01.25-17.48.04.912_1414.jpk-force	1414	-1.99219e-06	-7.42187e-07	-7.38192e-09	1.11429e-05	1.7036e-11	-4.54773e-05	-5.49921e-11	-9.02041e-07	1.97847e-11	-8.51019e-07	-3.10776e-11	1.87356e-11
map-data-2021.01.25-17.48.04.912_1415.jpk-force	1415	-1.91406e-06	-7.42187e-07	-7.39284e-09	9.77918e-06	8.32581e-11	-5.00093e-05	-6.58906e-11	1.3903e-06	1.0843e-11	1.43898e-06	-2.70351e-11	2.33744e-11
map-data-2021.01.25-17.48.04.912_1416.jpk-force	1416	-1.83594e-06	-7.42187e-07	-7.39866e-09	1.10759e-05	-9.27218e-13	-6.1726e-05	-1.27093e-11	-1.92256e-06	1.77626e-11	-1.94125e-06	6.87631e-13	8.04642e-12
map-data-2021.01.25-17.48.04.912_1417.jpk-force	1417	-1.75781e-06	-7.42187e-07	-7.38112e-09	1.09823e-05	-2.40426e-11	-6.8329e-05	-9.05425e-13	-1.39165e-06	2.29577e-11	-1.38398e-06	9.06836e-12	6.79528e-12
map-data-2021.01.25-17.48.04.912_1418.jpk-force	1418	-1.67969e-06	-7.42187e-07	-7.35161e-09	1.06584e-05	-4.12459e-11	-8.95859e-05	-4.75605e-11	-2.16406e-06	1.84726e-11	-2.12501e-06	-2.06363e-11	1.61036e-11
map-data-2021.01.25-17.48.04.912_1419.jpk-force	1419	-1.60156e-06	-7.42187e-07	-7.33073e-09	1.11097e-05	-1.10571e-10	-9.78648e-05	-1.27967e-11	-2.18451e-06	2.87916e-11	-2.14947e-06	9.66134e-12	8.48767e-12
map-data-2021.01.25-17.48.04.912_1420.jpk-force	1420	-1.52344e-06	-7.42187e-07	-7.39099e-09	1.11031e-05	-7.6094e-13	-5.72015e-05	-1.84365e-11	-9.76592e-07	2.07012e-11	-9.94933e-07	-6.39295e-13	8.70232e-12
map-data-2021.01.25-17.48.04.912_1421.jpk-force	1421	-1.44531e-06	-7.42187e-07	-7.48571e-09	1.11903e-05	9.74747e-12	-6.04103e-05	-1.40604e-11	-9.7638e-07	1.30904e-11	-9.97389e-07	4.79694e-13	6.73554e-12
map-data-2021.01.25-17.48.04.912_1422.jpk-force	1422	-1.36719e-06	-7.42187e-07	-7.43057e-09	9.83749e-06	3.84878e-11	-2.18332e-05	-5.00631e-11	6.65336e-08	7.68728e-12	1.09553e-07	-1.98156e-11	1.33706e-11
map-data-2021.01.25-17.48.04.912_1423.jpk-force	1423	-1.28906e-06	-7.42187e-07	-7.41474e-09	1.11537e-05	-8.23085e-12	-9.54885e-05	-5.24741e-11	-1.27355e-06	4.7901e-12	-1.2552e-06	-2.93599e-11	1.42e-11
map-data-2021.01.25-17.48.04.912_1424.jpk-force	1424	-1.21094e-06	-7.42187e-07	-7.39734e-09	1.11694e-05	2.53784e-11	-3.43908e-05	-1.14946e-11	-1.29875e-06	2.08088e-11	-1.2634e-06	1.17443e-12	6.77131e-12
map-data-2021.01.25-17.48.04.912_1425.jpk-force	1425	-1.13281e-06	-7.42187e-07	-7.39305e-09	1.12026e-05	-2.64165e-11	-6.93605e-05	-4.08649e-11	-2.62455e-06	3.12469e-11	-2.52676e-06	-9.71938e-12	1.35236e-11
map-data-2021.01.25-17.48.04.912_1426.jpk-force	1426	-1.05469e-06	-7.42187e-07	-7.41099e-09	1.1303e-05	1.40288e-11	-5.35856e-05	-1.78467e-11	-2.61421e-06	2.83533e-11	-2.63423e-06	1.60774e-12	8.39861e-12
map-data-2021.01.25-17.48.04.912_1427.jpk-force	1427	-9.76563e-07	-7.42187e-07	-7.39635e-09	1.114e-05	-1.43623e-11	-6.59409e-05	-9.58098e-12	-1.83355e-06	1.14385e-11	-1.82721e-06	1.86468e-12	5.44816e-12
map-data-2021.01.25-17.48.04.912_1428.jpk-force	1428	-8.98437e-07	-7.42187e-07	-7.39913e-09	1.12182e-05	1.01513e-11	-5.13576e-05	-3.80111e-11	-2.26292e-06	2.63084e-11	-2.23222e-06	-5.14852e-12	1.72729e-11
map-data-2021.01.25-17.48.04.912_1429.jpk-force	1429	-8.20313e-07	-7.42187e-07	-7.38898e-09	1.11991e-05	8.55743e-12	-5.45943e-05	-1.71983e-11	-2.19859e-06	2.48056e-11	-2.19158e-06	1.43571e-12	8.49303e-12
map-data-2021.01.25-17.48.04.912_1430.jpk-force	1430	-7.42187e-07	-7.42187e-07	-7.38957e-09	1.12674e-05	1.89696e-11	-5.53699e-05	-1.75186e-11	-8.70787e-07	8.84283e-12	-8.80457e-07	-4.72111e-12	7.42937e-12
map-data-2021.01.25-17.48.04.912_1431.jpk-force	1431	-6.64063e-07	-7.42187e-07	-7.41927e-09	1.14596e-05	1.73133e-11	-5.08811e-05	-6.64968e-11	-2.18343e-06	1.25983e-11	-2.17842e-06	-2.12752e-11	2.45011e-11
map-data-2021.01.25-17.48.04.912_1432.jpk-force	1432	-5.85938e-07	-7.42187e-07	-7.42865e-09	1.12742e-05	1.63029e-11	-5.26016e-05	-1.61477e-11	-1.10285e-06	1.57179e-11	-1.10752e-06	-4.80602e-12	9.2608e-12
map-data-2021.01.25-17.48.04.912_1433.jpk-force	1433	-5.07813e-07	-7.42187e-07	-7.41875e-09	1.14721e-05	-3.31118e-11	-6.07057e-05	-1.36644e-11	-2.1137e-06	1.44073e-11	-2.1097e-06	6.54078e-13	7.55851e-12
map-data-2021.01.25-17.48.04.912_1434.jpk-force	1434	-4.29688e-07	-7.42187e-07	-7.38247e-09	1.05812e-05	4.93834e-11	-4.14332e-05	-1.98768e-11	-1.33952e-06	9.38487e-12	-1.32851e-06	-5.05773e-12	7.13512e-12
map-data-2021.01.25-17.48.04.912_1435.jpk-force	1435	-3.51563e-07	-7.42187e-07	-7.38579e-09	1.12782e-05	1.99828e-11	-5.83142e-05	-1.59646e-11	-1.59639e-06	1.54799e-11	-1.60139e-06	-5.82952e-13	8.27957e-12
map-data-2021.01.25-17.48.04.912_1436.jpk-force	1436	-2.73438e-07	-7.42187e-07	-7.39259e-09	1.14493e-05	-4.45709e-11	-7.23191e-05	-7.37291e-12	-1.60727e-06	9.00912e-12	-1.59993e-06	2.09532e-13	4.40499e-12
map-data-2021.01.25-17.48.04.912_1437.jpk-force	1437	-1.95313e-07	-7.42187e-07	-7.30604e-09	1.10578e-05	5.34984e-11	-1.06714e-06	-5.21323e-11	-1.43013e-06	1.796e-11	-1.39544e-06	-2.15726e-11	1.83429e-11
map-data-2021.01.25-17.48.04.912_1438.jpk-force	1438	-1.17188e-07	-7.42187e-07	-7.30556e-09	1.13064e-05	-2.55722e-12	-5.8429e-05	-1.09428e-11	-1.43004e-06	1.56148e-11	-1.43471e-06	4.28105e-13	6.48761e-12
map-data-2021.01.25-17.48.04.912_1439.jpk-force	1439	-3.90635e-08	-7.42187e-07	-7.33057e-09	1.11832e-05	7.15902e-12	-6.3165e-05	-1.51975e-11	-1.43123e-06	1.87696e-11	-1.43624e-06	-2.71781e-13	6.46281e-12
map-data-2021.01.25-17.48.04.912_1440.jpk-force	1440	3.90618e-08	-7.42187e-07	-7.32217e-09	1.11862e-05	1.53712e-10	6.333e-05	-1.75215e-11	-1.43452e-06	2.78386e-11	-1.38215e-06	8.31395e-12	9.79015e-12
map-data-2021.01.25-17.48.04.912_1441.jpk-force	1441	1.17188e-07	-7.42187e-07	-7.32761e-09	1.09032e-05	1.39975e-11	-5.62246e-05	-5.07106e-11	-2.36745e-06	5.23892e-12	-2.33107e-06	-2.07615e-11	1.29003e-11
map-data-2021.01.25-17.48.04.912_1442.jpk-force	1442	1.95312e-07	-7.42187e-07	-7.41586e-09	1.11815e-05	1.38412e-11	-5.61288e-05	-1.5962e-11	1.04234e-07	1.37896e-11	1.20239e-07	1.44573e-12	7.6222e-12
map-data-2021.01.25-17.48.04.912_1443.jpk-force	1443	2.73438e-07	-7.42187e-07	-7.36767e-09	1.11851e-05	9.67799e-12	-4.13238e-05	-9.57512e-12	-7.29837e-07	1.51238e-11	-7.34505e-07	-3.53234e-13	6.47742e-12
map-data-2021.01.25-17.48.04.912_1444.jpk-force	1444	3.51562e-07	-7.42187e-07	-7.35073e-09	1.03011e-05	4.70438e-11	-4.81491e-05	-4.99117e-11	5.40369e-10	1.36812e-11	1.62138e-08	-2.13474e-11	1.47703e-11
map-data-2021.01.25-17.48.04.912_1445.jpk-force	1445	4.29686e-07	-7.42187e-07	-7.36423e-09	1.03563e-05	3.91974e-11	-5.62177e-05	-4.8149e-11	1.54497e-07	2.51988e-11	2.41205e-07	-1.46541e-11	2.00138e-11
map-data-2021.01.25-17.48.04.912_1446.jpk-force	1446	5.07812e-07	-7.42187e-07	-7.3668e-09	1.09212e-05	-3.87567e-12	-6.2427e-05	-4.76887e-11	-1.93509e-06	1.67027e-11	-1.87603e-06	-1.52245e-11	1.37812e-11
map-data-2021.01.25-17.48.04.912_1447.jpk-force	1447	5.85936e-07	-7.42187e-07	-7.34501e-09	9.82195e-06	3.29233e-11	-2.02657e-05	-5.19678e-11	1.29157e-07	1.23465e-11	1.87848e-07	-1.72525e-11	1.47259e-11
map-data-2021.01.25-17.48.04.912_1448.jpk-force	1448	6.64062e-07	-7.42187e-07	-7.35444e-09	1.06424e-05	1.66938e-11	-5.56251e-05	-1.20129e-11	7.93429e-08	2.02172e-11	8.36781e-08	5.80438e-12	7.11433e-12
map-data-2021.01.25-17.48.04.912_1449.jpk-force	1449	7.42187e-07	-7.42187e-07	-7.37426e-09	1.10158e-05	1.66306e-10	1.24751e-05	-1.83457e-11	-2.02346e-06	1.742e-11	-2.04148e-06	-4.03221e-12	8.3758e-12
map-data-2021.01.25-17.48.04.912_1450.jpk-force	1450	8.20312e-07	-7.42187e-07	-7.36899e-09	1.07778e-05	3.69897e-12	-5.76586e-05	-1.0415e-11	-1.68986e-06	4.55914e-12	-1.69954e-06	-3.39039e-12	3.70159e-12
map-data-2021.01.25-17.48.04.912_1451.jpk-force	1451	8.98437e-07	-7.42187e-07	-7.36072e-09	1.06073e-05	2.11313e-11	-4.47191e-05	-4.15943e-11	1.82088e-07	2.76455e-12	1.4107e-07	-1.82845e-11	9.35059e-12
map-data-2021.01.25-17.48.04.912_1452.jpk-force	1452	9.76562e-07	-7.42187e-07	-7.34916e-09	1.04454e-05	-5.6375e-11	-8.5642e-05	-5.77989e-11	-2.45604e-06	2.58366e-11	-2.4507e-06	-2.03124e-11	1.79667e-11
map-data-2021.01.25-17.48.04.912_1453.jpk-force	1453	1.05469e-06	-7.42187e-07	-7.33336e-09	1.03451e-05	7.2955e-12	-5.42752e-05	-4.29863e-12	-1.24284e-06	1.81508e-11	-1.2355e-06	4.82273e-12	5.62588e-12
map-data-2021.01.25-17.48.04.912_1454.jpk-force	1454	1.13281e-06	-7.42187e-07	-7.34627e-09	1.03282e-05	-5.09458e-11	-9.16905e-05	-1.44499e-11	-1.7966e-06	1.52512e-11	-1.81561e-06	-4.13457e-13	6.60208e-12
map-data-2021.01.25-17.48.04.912_1455.jpk-force	1455	1.21094e-06	-7.42187e-07	-7.35483e-09	1.01789e-05	-4.5287e-12	-6.30564e-05	-1.87635e-11	-1.58954e-06	1.73943e-11	-1.60923e-06	9.05445e-13	8.71776e-12
map-data-2021.01.25-17.48.04.912_1456.jpk-force	1456	1.28906e-06	-7.42187e-07	-7.37028e-09	9.97975e-06	1.5967e-11	-6.20066e-05	-1.02583e-11	-1.06344e-06	1.55126e-11	-1.05544e-06	2.67303e-12	6.44924e-12
map-data-2021.01.25-17.48.04.912_1457.jpk-force	1457	1.36719e-06	-7.42187e-07	-7.30264e-09	1.02596e-05	1.7411e-11	-4.69017e-05	-5.00968e-11	-1.38829e-06	1.32542e-11	-1.2919e-06	-2.18136e-11	1.68636e-11
map-data-2021.01.25-17.48.04.912_1458.jpk-force	1458	1.44531e-06	-7.42187e-07	-7.28601e-09	1.03415e-05	1.25414e-11	-5.41236e-05	-9.41874e-12	-1.04911e-06	2.956e-12	-1.05211e-06	-3.57088e-12	3.39562e-12
map-data-2021.01.25-17.48.04.912_1459.jpk-force	1459	1.52344e-06	-7.42187e-07	-7.35535e-09	1.00762e-05	1.34156e-11	-6.11273e-05	-1.0139e-11	-1.05011e-06	3.81102e-13	-1.05345e-06	-5.44092e-12	2.91586e-12
map-data-2021.01.25-17.48.04.912_1460.jpk-force	1460	1.60156e-06	-7.42187e-07	-7.33588e-09	1.09302e-05	8.68666e-12	-5.82916e-05	-4.09219e-11	-1.81956e-06	1.96007e-11	-1.73415e-06	-9.66232e-12	1.23704e-11
map-data-2021.01.25-17.48.04.912_1461.jpk-force	1461	1.67969e-06	-7.42187e-07	-7.31481e-09	1.03568e-05	3.15804e-11	-3.60479e-05	-8.63196e-12	-1.3209e-06	3.47954e-12	-1.32357e-06	-1.65522e-12	4.0019e-12
map-data-2021.01.25-17.48.04.912_1462.jpk-force	1462	1.75781e-06	-7.42187e-07	-7.31799e-09	9.53518e-06	2.28698e-12	-7.55857e-05	-4.48655e-11	-1.05101e-06	2.09142e-11	-9.17565e-07	-1.45518e-11	1.65322e-11
map-data-2021.01.25-17.48.04.912_1463.jpk-force	1463	1.83594e-06	-7.42187e-07	-7.3023e-09	1.02802e-05	-5.11624e-12	-6.44386e-05	-1.49171e-11	-1.02469e-06	2.18466e-11	-9.26985e-07	2.67059e-12	8.60339e-12
map-data-2021.01.25-17.48.04.912_1464.jpk-force	1464	1.91406e-06	-7.42187e-07	-7.31514e-09	1.02428e-05	1.17348e-11	-6.11148e-05	-3.93897e-11	-2.36536e-06	1.71334e-11	-2.33032e-06	-9.88288e-12	1.24462e-11
map-data-2021.01.25-17.48.04.912_1465.jpk-force	1465	1.99219e-06	-7.42187e-07	-7.31851e-09	1.0303e-05	3.86256e-12	-5.92431e-05	-1.28989e-11	-2.36653e-06	2.74491e-11	-2.45297e-06	4.96694e-12	7.94078e-12
map-data-2021.01.25-17.48.04.912_1466.jpk-force	1466	2.07031e-06	-7.42187e-07	-7.31097e-09	1.03054e-05	5.7699e-12	-5.89398e-05	-1.34269e-11	-2.45769e-06	2.20822e-11	-2.42165e-06	3.88449e-12	8.09465e-12
map-data-2021.01.25-17.48.04.912_1467.jpk-force	1467	2.14844e-06	-7.42187e-07	-7.36124e-09	1.01267e-05	-1.4996e-11	-8.16312e-05	-1.30764e-11	-1.57439e-06	2.0075e-11	-1.5784e-06	3.02842e-12	7.09987e-12
map-data-2021.01.25-17.48.04.912_1468.jpk-force	1468	2.22656e-06	-7.42187e-07	-7.29879e-09	9.36331e-06	-2.14967e-12	-6.04347e-05	-1.02539e-11	-1.57228e-06	1.89264e-11	-1.57729e-06	2.7141e-12	8.13687e-12
map-data-2021.01.25-17.48.04.912_1469.jpk-force	1469	2.30469e-06	-7.42187e-07	-7.28594e-09	9.88983e-06	6.20949e-12	-5.27761e-05	-5.12452e-12	-1.77798e-06	1.88993e-11	-1.78332e-06	4.39628e-12	6.68168e-12
map-data-2021.01.25-17.48.04.912_1470.jpk-force	1470	2.38281e-06	-7.42187e-07	-7.29891e-09	1.01208e-05	-3.97824e-11	-7.42025e-05	-1.1918e-11	-1.77763e-06	1.17877e-11	-1.79164e-06	-7.12564e-13	6.57879e-12
map-data-2021.01.25-17.48.04.912_1471.jpk-force	1471	2.46094e-06	-7.42187e-07	-7.28911e-09	1.02455e-05	-1.17785e-11	-6.34567e-05	-1.3174e-11	-1.78713e-06	1.83087e-11	-1.78279e-06	-2.33821e-12	7.50433e-12
map-data-2021.01.25-17.48.04.912_1472.jpk-force	1472	2.46094e-06	-6.64063e-07	-7.29198e-09	1.02019e-05	1.37664e-11	-5.3009e-05	-1.3036e-11	-1.29554e-06	1.04198e-11	-1.2922e-06	-1.86472e-12	5.01513e-12
map-data-2021.01.25-17.48.04.912_1473.jpk-force	1473	2.38281e-06	-6.64063e-07	-7.28068e-09	9.47192e-06	9.48603e-11	-2.63876e-05	-1.25172e-11	-1.29714e-06	1.09695e-11	-1.29247e-06	-4.01094e-12	5.55537e-12
map-data-2021.01.25-17.48.04.912_1474.jpk-force	1474	2.30469e-06	-6.64063e-07	-7.29492e-09	1.02929e-05	4.63494e-12	-5.65873e-05	-1.70296e-11	-1.29571e-06	2.19377e-11	-1.31605e-06	1.55249e-12	9.92414e-12
map-data-2021.01.25-17.48.04.912_1475.jpk-force	1475	2.22656e-06	-6.64063e-07	-7.31237e-09	1.01738e-05	-1.56523e-11	-7.62421e-05	-4.49639e-11	-2.14788e-06	2.05835e-11	-2.08847e-06	-1.2116e-11	1.38541e-11
map-data-2021.01.25-17.48.04.912_1476.jpk-force	1476	2.14844e-06	-6.64063e-07	-7.30713e-09	1.0286e-05	8.3068e-12	-6.05882e-05	-6.25365e-11	-1.63759e-06	1.34649e-11	-1.55453e-06	-2.91811e-11	1.97491e-11
map-data-2021.01.25-17.48.04.912_1477.jpk-force	1477	2.07031e-06	-6.64063e-07	-7.33991e-09	1.01348e-05	1.62027e-11	-5.96907e-05	-1.74378e-11	-1.66064e-06	2.49594e-11	-1.67098e-06	1.47234e-12	9.64473e-12
map-data-2021.01.25-17.48.04.912_1478.jpk-force	1478	1.99219e-06	-6.64063e-07	-7.31115e-09	1.07497e-05	3.21975e-11	-3.24908e-05	-7.8186e-12	-1.57007e-06	3.04474e-11	-1.67815e-06	7.25878e-12	7.42411e-12
map-data-2021.01.25-17.48.04.912_1479.jpk-force	1479	1.91406e-06	-6.64063e-07	-7.34154e-09	1.05818e-05	-8.69828e-13	-7.00034e-05	-2.01388e-11	-1.6369e-06	1.72285e-11	-1.57885e-06	-1.75587e-12	7.21914e-12
map-data-2021.01.25-17.48.04.912_1480.jpk-force	1480	1.83594e-06	-6.64063e-07	-7.32159e-09	1.04964e-05	1.86778e-12	-6.19209e-05	-1.48875e-11	-1.56017e-06	1.91205e-11	-1.6022e-06	1.42638e-12	7.49105e-12
map-data-2021.01.25-17.48.04.912_1481.jpk-force	1481	1.75781e-06	-6.64063e-07	-7.30918e-09	1.03591e-05	9.91183e-12	-5.33912e-05	-8.61894e-12	-1.58205e-06	2.01214e-11	-1.56203e-06	3.27252e-12	6.64344e-12
map-data-2021.01.25-17.48.04.912_1482.jpk-force	1482	1.67969e-06	-6.64063e-07	-7.315e-09	1.04432e-05	1.20698e-11	-6.30354e-05	-1.65501e-11	-1.14597e-06	2.22941e-11	-1.17732e-06	1.37284e-12	8.45735e-12
map-data-2021.01.25-17.48.04.912_1483.jpk-force	1483	1.60156e-06	-6.64063e-07	-7.3322e-09	1.04977e-05	1.05851e-11	-5.35365e-05	-5.3974e-11	-1.17346e-06	5.50051e-12	-1.15079e-06	-2.35977e-11	1.92828e-11
map-data-2021.01.25-17.48.04.912_1484.jpk-force	1484	1.52344e-06	-6.64063e-07	-7.31922e-09	1.02081e-05	1.70247e-11	-4.70546e-05	-1.21933e-11	-1.17381e-06	2.26157e-11	-1.17815e-06	4.81101e-12	7.66448e-12
map-data-2021.01.25-17.48.04.912_1485.jpk-force	1485	1.44531e-06	-6.64063e-07	-7.30299e-09	1.01728e-05	1.27189e-11	-4.49269e-05	-4.82704e-11	-9.99106e-07	2.60594e-11	-9.26075e-07	-1.37111e-11	1.66845e-11
map-data-2021.01.25-17.48.04.912_1486.jpk-force	1486	1.36719e-06	-6.64063e-07	-7.3436e-09	1.06247e-05	1.65646e-11	-5.31425e-05	-5.02e-12	-1.14123e-06	1.21002e-12	-1.13823e-06	-2.98844e-12	1.79414e-12
map-data-2021.01.25-17.48.04.912_1487.jpk-force	1487	1.28906e-06	-6.64063e-07	-7.31545e-09	1.02508e-05	1.84876e-11	-3.86573e-05	-9.90581e-12	-1.13834e-06	7.61204e-12	-1.141e-06	-1.6711e-13	6.43853e-12
map-data-2021.01.25-17.48.04.912_1488.jpk-force	1488	1.21094e-06	-6.64063e-07	-7.29625e-09	1.0184e-05	1.78724e-11	-3.87898e-05	-4.34088e-13	-1.1392e-06	5.0037e-12	-1.1412e-06	1.35691e-12	1.94696e-12
map-data-2021.01.25-17.48.04.912_1489.jpk-force	1489	1.13281e-06	-6.64063e-07	-7.30868e-09	1.06613e-05	2.02452e-11	-5.32278e-05	-8.30993e-12	-1.14152e-06	-1.93382e-12	-1.14052e-06	-4.86486e-12	2.04347e-12
map-data-2021.01.25-17.48.04.912_1490.jpk-force	1490	1.05469e-06	-6.64063e-07	-7.35809e-09	1.06125e-05	1.06739e-11	-6.92503e-05	-5.19371e-12	-1.13934e-06	1.95704e-12	-1.14068e-06	-2.15864e-12	2.87528e-12
map-data-2021.01.25-17.48.04.912_1491.jpk-force	1491	9.76563e-07	-6.64063e-07	-7.3588e-09	1.05698e-05	1.46142e-11	-7.02913e-05	-2.5822e-12	-1.14138e-06	8.22246e-12	-1.13871e-06	3.36946e-12	4.18256e-12
map-data-2021.01.25-17.48.04.912_1492.jpk-force	1492	8.98437e-07	-6.64063e-07	-7.35806e-09	9.99128e-06	2.25919e-11	-9.51411e-05	-3.83819e-11	-1.20591e-06	1.49172e-11	-1.17622e-06	-2.00596e-11	1.21481e-11
map-data-2021.01.25-17.48.04.912_1493.jpk-force	1493	8.20312e-07	-6.64063e-07	-7.42382e-09	1.15957e-05	9.85765e-12	-6.18064e-05	-1.08982e-11	-1.19182e-06	2.45641e-11	-1.19916e-06	8.38633e-12	8.29059e-12
map-data-2021.01.25-17.48.04.912_1494.jpk-force	1494	7.42187e-07	-6.64063e-07	-7.35678e-09	1.03911e-05	1.2165e-11	-5.47682e-05	-1.74233e-11	-1.24802e-06	1.80997e-11	-1.17598e-06	-1.10849e-12	7.27377e-12
map-data-2021.01.25-17.48.04.912_1495.jpk-force	1495	6.64062e-07	-6.64063e-07	-7.34338e-09	1.07284e-05	1.28682e-11	-4.84879e-05	-1.82059e-11	-1.20552e-06	1.70298e-11	-1.19885e-06	2.10798e-13	7.49822e-12
map-data-2021.01.25-17.48.04.912_1496.jpk-force	1496	5.85938e-07	-6.64063e-07	-7.35191e-09	1.06748e-05	8.72377e-12	-5.57326e-05	-1.40604e-11	-1.21863e-06	2.43779e-11	-1.23764e-06	4.52994e-12	8.41132e-12
map-data-2021.01.25-17.48.04.912_1497.jpk-force	1497	5.07813e-07	-6.64063e-07	-7.36063e-09	1.10545e-05	-2.05301e-10	-0.000150402	-5.16578e-11	-2.45667e-06	1.45444e-11	-2.38492e-06	-1.86642e-11	1.59128e-11
map-data-2021.01.25-17.48.04.912_1498.jpk-force	1498	4.29687e-07	-6.64063e-07	-7.35455e-09	1.07947e-05	-6.21678e-11	-9.30428e-05	-1.59819e-11	-2.44637e-06	2.43313e-11	-2.4754e-06	4.23875e-13	8.47406e-12
map-data-2021.01.25-17.48.04.912_1499.jpk-force	1499	3.51563e-07	-6.64063e-07	-7.35802e-09	1.08809e-05	-3.56766e-12	-6.38906e-05	-6.53897e-12	-1.06938e-06	1.75102e-11	-1.07372e-06	6.25428e-12	6.75711e-12
map-data-2021.01.25-17.48.04.912_1500.jpk-force	1500	2.73438e-07	-6.64063e-07	-7.34676e-09	1.09499e-05	3.63884e-12	-5.57696e-05	-1.464e-11	-1.09246e-06	1.62121e-11	-1.08479e-06	-1.76177e-12	7.78982e-12
map-data-2021.01.25-17.48.04.912_1501.jpk-force	1501	1.95312e-07	-6.64063e-07	-7.33868e-09	1.07193e-05	1.69375e-11	-4.20046e-05	-9.11197e-12	-1.04838e-06	1.69606e-13	-1.05272e-06	-4.62413e-12	2.81956e-12
map-data-2021.01.25-17.48.04.912_1502.jpk-force	1502	1.17187e-07	-6.64063e-07	-7.25549e-09	1.04357e-05	2.03429e-11	-2.71245e-05	-1.11638e-11	-1.05188e-06	2.03381e-12	-1.05388e-06	-4.24999e-12	4.36492e-12
map-data-2021.01.25-17.48.04.912_1503.jpk-force	1503	3.90618e-08	-6.64063e-07	-7.26621e-09	1.07297e-05	1.29404e-11	-5.69652e-05	-1.12907e-11	-1.05039e-06	1.68248e-12	-1.05406e-06	-5.59422e-12	3.97869e-12
map-data-2021.01.25-17.48.04.912_1504.jpk-force	1504	-3.90623e-08	-6.64063e-07	-7.32715e-09	1.07107e-05	4.52413e-12	-6.2917e-05	-6.48254e-12	-1.05204e-06	5.7807e-12	-1.05404e-06	-2.39472e-12	3.10152e-12
map-data-2021.01.25-17.48.04.912_1505.jpk-force	1505	-1.17187e-07	-6.64063e-07	-7.34599e-09	1.08419e-05	1.1798e-11	-5.57423e-05	-8.86458e-12	-1.04837e-06	7.80196e-13	-1.05304e-06	-3.21548e-12	3.25146e-12
map-data-2021.01.25-17.48.04.912_1506.jpk-force	1506	-1.95313e-07	-6.64063e-07	-7.33894e-09	1.08246e-05	1.50908e-11	-5.63821e-05	-8.90869e-12	-1.05046e-06	8.2161e-12	-1.05412e-06	-2.31183e-12	4.9787e-12
map-data-2021.01.25-17.48.04.912_1507.jpk-force	1507	-2.73438e-07	-6.64063e-07	-7.32053e-09	1.09626e-05	-8.57729e-12	-5.94227e-05	-6.063e-12	-1.04828e-06	9.07203e-12	-1.05128e-06	2.16765e-12	5.51373e-12
map-data-2021.01.25-17.48.04.912_1508.jpk-force	1508	-3.51563e-07	-6.64063e-07	-7.38077e-09	1.0703e-05	1.17044e-11	-5.85804e-05	-8.74532e-12	-1.05348e-06	1.92039e-11	-1.04882e-06	5.24346e-12	1.06796e-11
map-data-2021.01.25-17.48.04.912_1509.jpk-force	1509	-4.29688e-07	-6.64063e-07	-7.36685e-09	1.12929e-05	5.64366e-12	-5.58784e-05	-1.07889e-11	-1.05372e-06	6.83019e-12	-1.04839e-06	-2.70425e-12	5.21255e-12
map-data-2021.01.25-17.48.04.912_1510.jpk-force	1510	-5.07813e-07	-6.64063e-07	-7.37358e-09	1.09013e-05	1.74686e-11	-4.08156e-05	-1.27836e-11	-1.04831e-06	1.1328e-11	-1.05198e-06	1.59193e-12	7.28952e-12
map-data-2021.01.25-17.48.04.912_1511.jpk-force	1511	-5.85938e-07	-6.64063e-07	-7.34302e-09	1.05874e-05	-2.96134e-10	-0.00017655	-5.24003e-11	-2.63856e-06	1.12685e-11	-2.60318e-06	-1.24571e-11	1.57669e-11
map-data-2021.01.25-17.48.04.912_1512.jpk-force	1512	-6.64063e-07	-6.64063e-07	-7.34375e-09	9.69988e-06	1.45903e-11	-6.19822e-05	-1.40366e-11	-9.10825e-07	1.29414e-11	-9.14161e-07	-2.08769e-12	6.02029e-12
map-data-2021.01.25-17.48.04.912_1513.jpk-force	1513	-7.42187e-07	-6.64063e-07	-7.35199e-09	1.05534e-05	6.27614e-12	-5.58633e-05	-7.63695e-11	-2.02607e-06	2.38212e-11	-1.94364e-06	-2.67698e-11	2.81749e-11
map-data-2021.01.25-17.48.04.912_1514.jpk-force	1514	-8.20313e-07	-6.64063e-07	-7.40214e-09	1.081e-05	2.98535e-12	-6.17096e-05	-1.87807e-11	-1.43109e-06	1.95724e-11	-1.39507e-06	-8.08046e-13	8.40863e-12
map-data-2021.01.25-17.48.04.912_1515.jpk-force	1515	-8.98437e-07	-6.64063e-07	-7.38738e-09	1.09882e-05	5.98041e-11	-4.1926e-05	-1.40777e-11	-1.40024e-06	1.59583e-11	-1.40324e-06	-2.06406e-13	6.78292e-12
map-data-2021.01.25-17.48.04.912_1516.jpk-force	1516	-9.76563e-07	-6.64063e-07	-7.35589e-09	1.08803e-05	6.51715e-12	-5.77768e-05	-1.3934e-11	-1.41981e-06	1.59886e-11	-1.41147e-06	1.50204e-12	6.22168e-12
map-data-2021.01.25-17.48.04.912_1517.jpk-force	1517	-1.05469e-06	-6.64063e-07	-7.35677e-09	1.07712e-05	9.36331e-12	-5.55703e-05	-2.2235e-11	-1.42935e-06	1.33691e-11	-1.39567e-06	-1.03784e-12	7.62365e-12
map-data-2021.01.25-17.48.04.912_1518.jpk-force	1518	-1.13281e-06	-6.64063e-07	-7.34271e-09	1.06139e-05	6.49847e-12	-5.3109e-05	-6.62474e-11	-1.42974e-06	2.69804e-12	-1.39838e-06	-2.93227e-11	2.34736e-11
map-data-2021.01.25-17.48.04.912_1519.jpk-force	1519	-1.21094e-06	-6.64063e-07	-7.36482e-09	1.06872e-05	3.90776e-11	-3.60527e-05	-5.00701e-11	-1.23143e-06	1.68058e-11	-1.20042e-06	-2.90574e-11	1.78728e-11
map-data-2021.01.25-17.48.04.912_1520.jpk-force	1520	-1.28906e-06	-6.64063e-07	-7.3506e-09	1.05748e-05	1.19196e-11	-6.15732e-05	-1.96251e-11	-1.19713e-06	1.50577e-11	-1.21314e-06	-5.04322e-12	6.55813e-12
map-data-2021.01.25-17.48.04.912_1521.jpk-force	1521	-1.36719e-06	-6.64063e-07	-7.37732e-09	1.08057e-05	-1.09787e-11	-8.30562e-05	-1.66746e-11	-1.26112e-06	1.4014e-11	-1.26513e-06	-8.20814e-13	7.37018e-12
map-data-2021.01.25-17.48.04.912_1522.jpk-force	1522	-1.44531e-06	-6.64063e-07	-7.33206e-09	1.03649e-05	6.80272e-12	-5.81992e-05	-1.51902e-11	-1.25983e-06	2.03139e-11	-1.20146e-06	1.05935e-12	8.63229e-12
map-data-2021.01.25-17.48.04.912_1523.jpk-force	1523	-1.52344e-06	-6.64063e-07	-7.28066e-09	1.04696e-05	1.96031e-11	-4.11195e-05	-1.47299e-11	-1.26235e-06	1.72657e-11	-1.20165e-06	-6.35174e-13	6.88972e-12
map-data-2021.01.25-17.48.04.912_1524.jpk-force	1524	-1.60156e-06	-6.64063e-07	-7.27148e-09	1.06267e-05	1.09482e-10	9.74712e-06	-1.89438e-11	-1.24758e-06	2.18573e-11	-1.21423e-06	-2.69384e-12	7.31624e-12
map-data-2021.01.25-17.48.04.912_1525.jpk-force	1525	-1.67969e-06	-6.64063e-07	-7.25117e-09	1.0554e-05	3.89539e-11	-1.98958e-05	-1.26957e-11	-1.2505e-06	2.59544e-11	-1.26918e-06	6.01224e-12	7.79372e-12
map-data-2021.01.25-17.48.04.912_1526.jpk-force	1526	-1.75781e-06	-6.64063e-07	-7.33441e-09	1.07125e-05	-4.98767e-13	-7.02441e-05	-1.68587e-11	-1.2468e-06	1.66811e-11	-1.21112e-06	2.85121e-13	7.18092e-12
map-data-2021.01.25-17.48.04.912_1527.jpk-force	1527	-1.83594e-06	-6.64063e-07	-7.3679e-09	1.0997e-05	-2.41455e-12	-6.53453e-05	-1.43869e-11	-1.23594e-06	1.64196e-11	-1.19993e-06	1.10389e-12	7.15167e-12
map-data-2021.01.25-17.48.04.912_1528.jpk-force	1528	-1.91406e-06	-6.64063e-07	-7.37831e-09	1.08886e-05	1.53979e-11	-4.0096e-05	-2.22969e-12	-1.23263e-06	2.9913e-11	-1.23764e-06	1.40614e-11	7.88123e-12
map-data-2021.01.25-17.48.04.912_1529.jpk-force	1529	-1.99219e-06	-6.64063e-07	-7.36661e-09	1.06437e-05	1.31266e-11	-5.37713e-05	-3.96703e-11	-1.93492e-06	1.79979e-11	-2.04336e-06	-1.61234e-11	1.23881e-11
map-data-2021.01.25-17.48.04.912_1530.jpk-force	1530	-2.07031e-06	-6.64063e-07	-7.35239e-09	1.06383e-05	2.29518e-11	-4.6373e-05	-8.63441e-11	-1.97676e-06	1.67485e-11	-1.90202e-06	-3.94713e-11	2.99349e-11
map-data-2021.01.25-17.48.04.912_1531.jpk-force	1531	-2.14844e-06	-6.64063e-07	-7.35063e-09	1.05797e-05	-8.30552e-12	-6.25961e-05	-4.07966e-11	-1.86848e-06	1.03883e-11	-1.82678e-06	-1.80067e-11	1.19897e-11
map-data-2021.01.25-17.48.04.912_1532.jpk-force	1532	-2.22656e-06	-6.64063e-07	-7.36497e-09	1.05593e-05	4.31707e-11	-4.32436e-05	-4.64449e-11	-1.8434e-06	1.10053e-11	-1.83606e-06	-2.27456e-11	1.25729e-11
map-data-2021.01.25-17.48.04.912_1533.jpk-force	1533	-2.30469e-06	-6.64063e-07	-7.38334e-09	9.59968e-06	2.60638e-11	-4.97995e-05	-2.02618e-11	6.31849e-07	1.80925e-11	6.06504e-07	-4.72701e-13	8.88899e-12
map-data-2021.01.25-17.48.04.912_1534.jpk-force	1534	-2.38281e-06	-6.64063e-07	-7.34765e-09	1.02097e-05	4.8149e-13	-6.56865e-05	-1.24122e-11	-1.68093e-06	1.04436e-11	-1.6856e-06	-1.03739e-12	6.00644e-12
map-data-2021.01.25-17.48.04.912_1535.jpk-force	1535	-2.46094e-06	-6.64063e-07	-7.37085e-09	1.03397e-05	2.34609e-11	-4.61972e-05	-1.41991e-11	-1.69013e-06	1.11396e-11	-1.67245e-06	-5.5032e-14	7.4213e-12
map-data-2021.01.25-17.48.04.912_1536.jpk-force	1536	-2.46094e-06	-5.85937e-07	-7.3578e-09	1.02475e-05	2.76736e-12	-6.53796e-05	-1.60058e-11	-1.68215e-06	1.43623e-11	-1.67781e-06	1.52228e-12	8.62426e-12
map-data-2021.01.25-17.48.04.912_1537.jpk-force	1537	-2.38281e-06	-5.85937e-07	-7.37356e-09	1.02139e-05	1.87287e-11	-5.71404e-05	-7.76999e-12	-1.67435e-06	9.34516e-12	-1.67968e-06	1.32534e-12	4.28581e-12
map-data-2021.01.25-17.48.04.912_1538.jpk-force	1538	-2.30469e-06	-5.85937e-07	-7.35677e-09	1.05245e-05	1.54368e-11	-5.36842e-05	-9.05295e-12	-1.68949e-06	1.03976e-11	-1.67948e-06	-3.50638e-14	4.63578e-12
map-data-2021.01.25-17.48.04.912_1539.jpk-force	1539	-2.22656e-06	-5.85937e-07	-7.3469e-09	9.88235e-06	-1.0559e-11	-7.12319e-05	-8.98382e-12	-1.68885e-06	7.86138e-12	-1.69252e-06	5.42377e-13	4.23754e-12
map-data-2021.01.25-17.48.04.912_1540.jpk-force	1540	-2.14844e-06	-5.85937e-07	-7.34102e-09	9.97784e-06	2.39575e-13	-6.27799e-05	-5.184e-11	-2.54859e-06	1.69618e-11	-2.49919e-06	-1.20874e-11	1.48253e-11
map-data-2021.01.25-17.48.04.912_1541.jpk-force	1541	-2.07031e-06	-5.85937e-07	-7.32742e-09	1.00385e-05	-6.34421e-11	-8.85355e-05	-1.34624e-11	-2.47033e-06	2.08699e-11	-2.54141e-06	2.41666e-12	8.7724e-12
map-data-2021.01.25-17.48.04.912_1542.jpk-force	1542	-1.99219e-06	-5.85937e-07	-7.33959e-09	1.01685e-05	-2.22733e-11	-7.10826e-05	-1.45897e-11	-2.54605e-06	2.024e-11	-2.48831e-06	-2.05533e-14	7.87583e-12
map-data-2021.01.25-17.48.04.912_1543.jpk-force	1543	-1.91406e-06	-5.85937e-07	-7.33825e-09	1.03168e-05	1.13374e-11	-5.56043e-05	-3.36001e-11	-1.89761e-06	1.53494e-11	-1.81487e-06	-1.31615e-11	1.05151e-11
map-data-2021.01.25-17.48.04.912_1544.jpk-force	1544	-1.83594e-06	-5.85937e-07	-7.32448e-09	1.02577e-05	7.71058e-12	-5.16587e-05	-8.74432e-12	-1.84278e-06	1.35536e-11	-1.85146e-06	9.97881e-13	5.17775e-12
map-data-2021.01.25-17.48.04.912_1545.jpk-force	1545	-1.75781e-06	-5.85937e-07	-7.36598e-09	1.02084e-05	6.33233e-12	-6.73646e-05	-1.7659e-11	-1.85622e-06	1.21644e-11	-1.86056e-06	-1.55894e-12	6.81543e-12
map-data-2021.01.25-17.48.04.912_1546.jpk-force	1546	-1.67969e-06	-5.85937e-07	-7.3619e-09	1.05539e-05	3.23799e-11	-3.54899e-05	-8.21537e-12	-1.84919e-06	1.91533e-11	-1.85453e-06	6.64564e-12	7.40304e-12
map-data-2021.01.25-17.48.04.912_1547.jpk-force	1547	-1.60156e-06	-5.85937e-07	-7.29335e-09	9.83543e-06	2.04681e-11	-4.37941e-05	-1.49003e-11	-1.83158e-06	2.19655e-11	-1.85093e-06	5.16725e-12	9.35168e-12
map-data-2021.01.25-17.48.04.912_1548.jpk-force	1548	-1.52344e-06	-5.85937e-07	-7.33695e-09	1.01107e-05	1.51179e-11	-9.239e-05	-1.59151e-11	1.30387e-07	1.47966e-11	1.64726e-07	-1.60052e-12	7.96492e-12
map-data-2021.01.25-17.48.04.912_1549.jpk-force	1549	-1.44531e-06	-5.85937e-07	-7.32444e-09	1.03248e-05	1.5491e-11	-4.46929e-05	-1.62958e-11	1.59593e-07	1.52635e-11	1.41586e-07	5.44659e-13	7.69697e-12
map-data-2021.01.25-17.48.04.912_1550.jpk-force	1550	-1.36719e-06	-5.85937e-07	-7.29851e-09	1.0214e-05	1.60949e-11	-3.56305e-05	-1.75515e-11	1.80457e-07	1.74945e-11	1.50445e-07	-1.2827e-13	7.0625e-12
map-data-2021.01.25-17.48.04.912_1551.jpk-force	1551	-1.28906e-06	-5.85937e-07	-7.31201e-09	1.01271e-05	1.11073e-11	-3.29517e-05	-1.68849e-11	1.83244e-07	2.18653e-11	1.90246e-07	-4.48459e-13	8.01495e-12
map-data-2021.01.25-17.48.04.912_1552.jpk-force	1552	-1.21094e-06	-5.85937e-07	-7.29638e-09	9.77646e-06	2.78047e-11	-4.29235e-05	-3.65199e-11	-1.76523e-06	1.6973e-11	-1.64475e-06	-1.59386e-11	1.34247e-11
map-data-2021.01.25-17.48.04.912_1553.jpk-force	1553	-1.13281e-06	-5.85937e-07	-7.30249e-09	1.03854e-05	2.83023e-11	-3.2221e-05	-1.89706e-11	-1.66165e-06	1.99786e-11	-1.74672e-06	1.82249e-12	9.06365e-12
map-data-2021.01.25-17.48.04.912_1554.jpk-force	1554	-1.05469e-06	-5.85937e-07	-7.3695e-09	1.04129e-05	-6.77439e-11	-0.000113501	-1.76486e-11	-1.71707e-06	1.3097e-11	-1.70973e-06	-1.56836e-12	6.94198e-12
map-data-2021.01.25-17.48.04.912_1555.jpk-force	1555	-9.76563e-07	-5.85937e-07	-7.31771e-09	1.06114e-05	1.55455e-11	-3.42895e-05	-1.44784e-11	-6.87574e-07	1.37042e-11	-6.9391e-07	-5.26146e-13	7.56385e-12
map-data-2021.01.25-17.48.04.912_1556.jpk-force	1556	-8.98437e-07	-5.85937e-07	-7.305e-09	9.66976e-06	4.86821e-11	-4.16035e-05	-5.58497e-11	4.21498e-08	1.69347e-11	8.25004e-08	-1.92423e-11	2.04577e-11
map-data-2021.01.25-17.48.04.912_1557.jpk-force	1557	-8.20313e-07	-5.85937e-07	-7.32002e-09	1.05506e-05	1.42044e-11	-4.77599e-05	-1.74294e-11	1.16431e-07	2.4381e-11	1.07762e-07	-1.1922e-12	8.2056e-12
map-data-2021.01.25-17.48.04.912_1558.jpk-force	1558	-7.42187e-07	-5.85937e-07	-7.32911e-09	1.04142e-05	1.53225e-11	-4.39655e-05	-1.47256e-11	7.87872e-08	1.73282e-11	1.26472e-07	-6.63412e-13	6.61949e-12
map-data-2021.01.25-17.48.04.912_1559.jpk-force	1559	-6.64063e-07	-5.85937e-07	-7.32923e-09	1.04494e-05	1.00627e-11	-5.08679e-05	-1.36357e-11	-9.73168e-07	1.51434e-11	-9.8017e-07	9.78127e-13	7.10388e-12
map-data-2021.01.25-17.48.04.912_1560.jpk-force	1560	-5.85938e-07	-5.85937e-07	-7.34416e-09	1.0355e-05	4.67149e-11	-4.5673e-05	-3.08579e-11	-2.54773e-06	2.29451e-11	-2.47564e-06	-4.76468e-12	1.01454e-11
map-data-2021.01.25-17.48.04.912_1561.jpk-force	1561	-5.07813e-07	-5.85937e-07	-7.31094e-09	1.0383e-05	1.57076e-11	-4.4691e-05	-5.62903e-11	-2.27291e-06	1.67958e-11	-2.19815e-06	-2.353e-11	1.90847e-11
map-data-2021.01.25-17.48.04.912_1562.jpk-force	1562	-4.29688e-07	-5.85937e-07	-7.28544e-09	1.04533e-05	5.55813e-13	-5.03404e-05	-1.97605e-11	-2.04041e-06	1.83674e-11	-2.04909e-06	7.59186e-13	8.06363e-12
map-data-2021.01.25-17.48.04.912_1563.jpk-force	1563	-3.51563e-07	-5.85937e-07	-7.32493e-09	1.04499e-05	1.85138e-12	-6.62095e-05	-1.80579e-11	-2.09134e-06	1.65568e-11	-2.08433e-06	2.78539e-14	6.12115e-12
map-data-2021.01.25-17.48.04.912_1564.jpk-force	1564	-2.73438e-07	-5.85937e-07	-7.33479e-09	1.06204e-05	1.16992e-11	-5.61087e-05	-6.85359e-12	-4.05457e-07	1.19929e-11	-4.10126e-07	9.24558e-13	5.45021e-12
map-data-2021.01.25-17.48.04.912_1565.jpk-force	1565	-1.95313e-07	-5.85937e-07	-7.3336e-09	1.04604e-05	3.20362e-11	-4.59875e-05	-1.40688e-11	-1.09046e-06	3.06775e-12	-1.08613e-06	-6.16345e-12	5.15789e-12
map-data-2021.01.25-17.48.04.912_1566.jpk-force	1566	-1.17188e-07	-5.85937e-07	-7.37226e-09	1.0394e-05	6.01536e-11	-5.77098e-05	-6.51463e-11	-2.39559e-06	2.33543e-11	-2.2691e-06	-1.91304e-11	2.41542e-11
map-data-2021.01.25-17.48.04.912_1567.jpk-force	1567	-3.90635e-08	-5.85937e-07	-7.33683e-09	1.0566e-05	6.9645e-11	-3.17487e-05	-1.41742e-11	-2.25115e-06	2.7889e-11	-2.35995e-06	3.50627e-12	8.07469e-12
map-data-2021.01.25-17.48.04.912_1568.jpk-force	1568	3.90618e-08	-5.85937e-07	-7.3305e-09	1.04966e-05	4.80349e-11	-3.65021e-05	-1.19777e-11	-2.36535e-06	1.61223e-11	-2.35834e-06	2.81852e-12	7.33373e-12
map-data-2021.01.25-17.48.04.912_1569.jpk-force	1569	1.17188e-07	-5.85937e-07	-7.30108e-09	1.04598e-05	-7.44205e-13	-5.50525e-05	-1.7886e-11	-1.68957e-06	1.06895e-11	-1.6979e-06	-9.93772e-13	6.51322e-12
map-data-2021.01.25-17.48.04.912_1570.jpk-force	1570	1.95312e-07	-5.85937e-07	-7.27143e-09	1.03803e-05	1.72881e-11	-4.40637e-05	-1.4815e-11	-1.69072e-06	4.92392e-12	-1.67037e-06	-2.8397e-12	4.84241e-12
map-data-2021.01.25-17.48.04.912_1571.jpk-force	1571	2.73438e-07	-5.85937e-07	-7.28576e-09	1.05098e-05	1.70035e-11	-3.81286e-05	-5.38479e-11	-1.7965e-06	2.36196e-11	-1.74679e-06	-6.45827e-12	1.42401e-11
map-data-2021.01.25-17.48.04.912_1572.jpk-force	1572	3.51562e-07	-5.85937e-07	-7.28446e-09	1.03806e-05	2.41331e-11	-4.48137e-05	-5.3711e-11	-1.7955e-06	2.00255e-11	-1.74579e-06	-2.26663e-11	1.55411e-11
map-data-2021.01.25-17.48.04.912_1573.jpk-force	1573	4.29686e-07	-5.85937e-07	-7.3712e-09	1.04682e-05	2.9604e-11	-5.11266e-05	-8.02222e-12	-6.18554e-07	2.02585e-11	-6.00212e-07	2.6232e-12	6.48399e-12
map-data-2021.01.25-17.48.04.912_1574.jpk-force	1574	5.07812e-07	-5.85937e-07	-7.29574e-09	1.03005e-05	1.40145e-11	-5.79471e-05	-1.32871e-11	-6.18579e-07	1.29299e-11	-5.99238e-07	6.19685e-13	6.10034e-12
map-data-2021.01.25-17.48.04.912_1575.jpk-force	1575	5.85936e-07	-5.85937e-07	-7.29426e-09	1.04155e-05	1.25014e-11	-5.40007e-05	-1.02783e-11	-6.10939e-07	1.32837e-11	-6.29614e-07	9.54724e-13	5.63149e-12
map-data-2021.01.25-17.48.04.912_1576.jpk-force	1576	6.64062e-07	-5.85937e-07	-7.24774e-09	1.04445e-05	2.63672e-11	-3.88639e-05	-7.17018e-11	-1.37614e-06	1.01432e-11	-1.28876e-06	-3.54804e-11	2.50118e-11
map-data-2021.01.25-17.48.04.912_1577.jpk-force	1577	7.42187e-07	-5.85937e-07	-7.31098e-09	1.07413e-05	1.56167e-11	-5.99543e-05	-6.21882e-12	-8.55754e-07	1.20208e-11	-8.36746e-07	1.76217e-12	4.26371e-12
map-data-2021.01.25-17.48.04.912_1578.jpk-force	1578	8.20312e-07	-5.85937e-07	-7.31727e-09	1.05452e-05	-2.88631e-11	-0.000115851	-1.39204e-11	-8.41774e-07	1.187e-11	-8.37105e-07	-3.15263e-12	5.94849e-12
map-data-2021.01.25-17.48.04.912_1579.jpk-force	1579	8.98437e-07	-5.85937e-07	-7.29785e-09	1.03539e-05	1.0748e-10	5.82234e-05	-1.72805e-11	-8.55452e-07	1.92222e-11	-8.38111e-07	9.12441e-13	9.82738e-12
map-data-2021.01.25-17.48.04.912_1580.jpk-force	1580	9.76562e-07	-5.85937e-07	-7.29634e-09	9.56733e-06	5.5332e-11	-5.29946e-05	-1.31825e-11	6.74684e-07	1.39379e-11	6.88024e-07	-9.03079e-14	6.79692e-12
map-data-2021.01.25-17.48.04.912_1581.jpk-force	1581	1.05469e-06	-5.85937e-07	-7.32522e-09	1.04422e-05	-5.46254e-12	-5.95829e-05	-6.77259e-11	-1.5177e-06	8.24834e-12	-1.51237e-06	-3.52063e-11	2.05358e-11
map-data-2021.01.25-17.48.04.912_1582.jpk-force	1582	1.13281e-06	-5.85937e-07	-7.31353e-09	1.03618e-05	2.90992e-11	-2.37599e-05	-1.59841e-11	-1.57153e-06	2.22207e-11	-1.58921e-06	3.54501e-12	7.94008e-12
map-data-2021.01.25-17.48.04.912_1583.jpk-force	1583	1.21094e-06	-5.85937e-07	-7.27386e-09	1.07395e-05	1.98176e-11	-6.00823e-05	-1.51538e-11	-1.5465e-06	3.08004e-11	-1.56418e-06	2.36073e-12	9.70292e-12
map-data-2021.01.25-17.48.04.912_1584.jpk-force	1584	1.28906e-06	-5.85937e-07	-7.3092e-09	1.00313e-05	1.45914e-11	-4.05873e-05	-8.24748e-12	-1.61313e-06	3.38654e-11	-1.55475e-06	1.05856e-11	8.36637e-12
map-data-2021.01.25-17.48.04.912_1585.jpk-force	1585	1.36719e-06	-5.85937e-07	-7.32525e-09	1.0418e-05	2.23639e-11	-5.50484e-05	-9.13388e-12	-1.13544e-06	2.5623e-12	-1.14144e-06	-3.11456e-12	3.59354e-12
map-data-2021.01.25-17.48.04.912_1586.jpk-force	1586	1.44531e-06	-5.85937e-07	-7.29947e-09	1.03461e-05	1.87114e-11	-3.93986e-05	-1.59867e-11	-1.14409e-06	1.53812e-11	-1.14009e-06	1.47289e-12	9.18474e-12
map-data-2021.01.25-17.48.04.912_1587.jpk-force	1587	1.52344e-06	-5.85937e-07	-7.32211e-09	1.09324e-05	1.30589e-11	-4.51007e-05	-7.35028e-12	-1.13972e-06	8.19684e-12	-1.13505e-06	-9.78395e-13	4.17928e-12
map-data-2021.01.25-17.48.04.912_1588.jpk-force	1588	1.60156e-06	-5.85937e-07	-7.31676e-09	1.09365e-05	1.53437e-11	-4.42201e-05	-1.41762e-11	-1.1439e-06	1.37817e-11	-1.13623e-06	9.99582e-13	7.71232e-12
map-data-2021.01.25-17.48.04.912_1589.jpk-force	1589	1.67969e-06	-5.85937e-07	-7.35312e-09	1.06562e-05	2.03299e-11	-4.84372e-05	-5.06311e-11	-1.36444e-06	1.0119e-11	-1.26771e-06	-2.5069e-11	1.3312e-11
map-data-2021.01.25-17.48.04.912_1590.jpk-force	1590	1.75781e-06	-5.85937e-07	-7.29924e-09	1.03019e-05	2.17267e-11	-7.82175e-05	-1.18508e-11	-7.02081e-07	1.77357e-11	-6.96412e-07	1.96296e-12	7.38748e-12
map-data-2021.01.25-17.48.04.912_1591.jpk-force	1591	1.83594e-06	-5.85937e-07	-7.29927e-09	1.02823e-05	2.39892e-11	-4.45508e-05	-1.41159e-11	-5.58861e-07	1.34263e-11	-5.63863e-07	3.39944e-13	8.07197e-12
map-data-2021.01.25-17.48.04.912_1592.jpk-force	1592	1.91406e-06	-5.85937e-07	-7.26461e-09	9.83378e-06	1.05721e-11	-6.92844e-05	-7.56516e-12	-5.63174e-07	7.67541e-12	-5.6851e-07	-1.03797e-12	3.90612e-12
map-data-2021.01.25-17.48.04.912_1593.jpk-force	1593	1.99219e-06	-5.85937e-07	-7.28584e-09	1.00795e-05	1.63345e-11	-5.8866e-05	-7.59126e-12	-5.59489e-07	2.11258e-11	-5.63157e-07	6.06517e-12	9.27062e-12
map-data-2021.01.25-17.48.04.912_1594.jpk-force	1594	2.07031e-06	-5.85937e-07	-7.33028e-09	1.01637e-05	1.44166e-11	-5.22336e-05	-1.16481e-11	-5.66489e-07	1.20479e-11	-5.59486e-07	8.17684e-13	7.96263e-12
map-data-2021.01.25-17.48.04.912_1595.jpk-force	1595	2.14844e-06	-5.85937e-07	-7.27632e-09	1.01578e-05	1.29047e-11	-5.2087e-05	-9.62557e-12	-5.59202e-07	8.99379e-12	-5.62537e-07	1.60994e-12	5.72089e-12
map-data-2021.01.25-17.48.04.912_1596.jpk-force	1596	2.22656e-06	-5.85937e-07	-7.31349e-09	1.03151e-05	9.6461e-12	-4.55274e-05	-1.38782e-11	-5.5897e-07	8.61257e-12	-5.6564e-07	-1.63683e-12	6.60455e-12
map-data-2021.01.25-17.48.04.912_1597.jpk-force	1597	2.30469e-06	-5.85937e-07	-7.30482e-09	1.01167e-05	2.00199e-11	-4.79792e-05	-1.67713e-11	-5.59352e-07	1.30385e-11	-5.65022e-07	-1.10178e-12	1.11136e-11
map-data-2021.01.25-17.48.04.912_1598.jpk-force	1598	2.38281e-06	-5.85937e-07	-7.27532e-09	1.00319e-05	1.62558e-11	-3.55661e-05	-1.12881e-11	-5.62311e-07	5.03066e-12	-5.66313e-07	-3.6793e-12	5.12999e-12
map-data-2021.01.25-17.48.04.912_1599.jpk-force	1599	2.46094e-06	-5.85937e-07	-7.29788e-09	1.0391e-05	1.53182e-11	-5.46114e-05	-1.07759e-11	-5.67261e-07	1.5358e-11	-5.62925e-07	3.76138e-13	8.25499e-12
map-data-2021.01.25-17.48.04.912_1600.jpk-force	1600	2.46094e-06	-5.07812e-07	-7.30793e-09	1.05888e-05	-2.28164e-12	-6.1681e-05	-3.57738e-11	-2.41468e-06	1.29353e-11	-2.3833e-06	-1.34261e-11	1.06259e-11
map-data-2021.01.25-17.48.04.912_1601.jpk-force	1601	2.38281e-06	-5.07812e-07	-7.33205e-09	1.04764e-05	-1.83352e-10	-0.000134848	-4.05984e-11	-2.25304e-06	1.19062e-11	-2.23569e-06	-1.55276e-11	1.20101e-11
map-data-2021.01.25-17.48.04.912_1602.jpk-force	1602	2.30469e-06	-5.07812e-07	-7.30917e-09	1.08072e-05	-3.59368e-10	-0.000218315	-1.85881e-11	-2.27444e-06	1.65857e-11	-2.26976e-06	1.04898e-12	7.85429e-12
map-data-2021.01.25-17.48.04.912_1603.jpk-force	1603	2.22656e-06	-5.07812e-07	-7.30951e-09	1.05457e-05	5.93702e-11	-2.85315e-05	-1.21877e-11	-2.23296e-06	1.84623e-11	-2.2947e-06	-3.40221e-13	6.65277e-12
map-data-2021.01.25-17.48.04.912_1604.jpk-force	1604	2.14844e-06	-5.07812e-07	-7.31337e-09	1.04527e-05	-1.2391e-12	-7.18634e-05	-4.19201e-11	-1.71519e-06	1.747e-11	-1.6578e-06	-1.34162e-11	1.44995e-11
map-data-2021.01.25-17.48.04.912_1605.jpk-force	1605	2.07031e-06	-5.07812e-07	-7.30842e-09	9.93252e-06	7.20177e-12	-7.29617e-05	-6.37763e-11	-1.05068e-06	1.80702e-11	-9.26615e-07	-2.16189e-11	2.04445e-11
map-data-2021.01.25-17.48.04.912_1606.jpk-force	1606	1.99219e-06	-5.07812e-07	-7.33311e-09	1.0459e-05	2.04912e-11	-4.61006e-05	-2.1794e-11	-9.99353e-07	2.01746e-11	-1.10807e-06	-8.23528e-13	8.54511e-12
map-data-2021.01.25-17.48.04.912_1607.jpk-force	1607	1.91406e-06	-5.07812e-07	-7.3104e-09	1.04688e-05	1.70069e-11	-4.56294e-05	-1.51894e-11	-1.07871e-06	2.1383e-11	-1.00668e-06	6.79526e-13	7.92498e-12
map-data-2021.01.25-17.48.04.912_1608.jpk-force	1608	1.83594e-06	-5.07812e-07	-7.33172e-09	1.06672e-05	-2.83972e-11	-7.64637e-05	-4.75533e-11	-2.556e-06	1.75815e-11	-2.46121e-06	-2.10719e-11	1.76226e-11
map-data-2021.01.25-17.48.04.912_1609.jpk-force	1609	1.75781e-06	-5.07812e-07	-7.35075e-09	1.04026e-05	1.52582e-11	-5.76399e-05	-5.6125e-11	-2.19582e-06	2.8952e-11	-2.1007e-06	-8.99228e-12	2.16577e-11
map-data-2021.01.25-17.48.04.912_1610.jpk-force	1610	1.67969e-06	-5.07812e-07	-7.34939e-09	1.07019e-05	-4.76825e-11	-8.73495e-05	-1.88427e-11	-2.20565e-06	2.35498e-11	-2.12088e-06	1.57571e-12	8.29723e-12
map-data-2021.01.25-17.48.04.912_1611.jpk-force	1611	1.60156e-06	-5.07812e-07	-7.36227e-09	1.10163e-05	-2.78066e-12	-5.99852e-05	-6.82117e-12	-1.443e-06	2.1726e-11	-1.438e-06	4.08718e-12	9.19978e-12
map-data-2021.01.25-17.48.04.912_1612.jpk-force	1612	1.52344e-06	-5.07812e-07	-7.37658e-09	1.07072e-05	-1.51471e-11	-7.29912e-05	-1.17113e-11	-1.44365e-06	4.04417e-12	-1.43931e-06	-1.57744e-12	4.2816e-12
map-data-2021.01.25-17.48.04.912_1613.jpk-force	1613	1.44531e-06	-5.07812e-07	-7.36839e-09	1.11437e-05	-2.15009e-11	-6.32838e-05	-2.51909e-12	-1.4449e-06	1.32701e-11	-1.43956e-06	5.75156e-12	5.42974e-12
map-data-2021.01.25-17.48.04.912_1614.jpk-force	1614	1.36719e-06	-5.07812e-07	-7.34138e-09	1.13192e-05	3.9698e-11	-3.83109e-05	-4.41363e-11	-1.46617e-06	2.5162e-11	-1.44916e-06	-1.08657e-11	1.58908e-11
map-data-2021.01.25-17.48.04.912_1615.jpk-force	1615	1.28906e-06	-5.07812e-07	-7.35862e-09	1.09869e-05	1.78122e-11	-5.0718e-05	-1.76429e-11	-1.40725e-06	2.36822e-11	-1.45027e-06	1.74026e-12	7.64393e-12
map-data-2021.01.25-17.48.04.912_1616.jpk-force	1616	1.21094e-06	-5.07812e-07	-7.40368e-09	1.11842e-05	1.79821e-11	-4.11844e-05	-1.62652e-11	-1.37686e-06	1.74468e-11	-1.37219e-06	-2.72917e-12	8.09003e-12
map-data-2021.01.25-17.48.04.912_1617.jpk-force	1617	1.13281e-06	-5.07812e-07	-7.40045e-09	1.11851e-05	6.85108e-12	-5.78593e-05	-5.00013e-11	-2.19656e-06	1.78798e-11	-2.19122e-06	-1.71324e-11	1.02881e-11
map-data-2021.01.25-17.48.04.912_1618.jpk-force	1618	1.05469e-06	-5.07812e-07	-7.44225e-09	1.10938e-05	1.32598e-11	-5.98666e-05	-7.51464e-12	-9.82092e-07	1.02976e-11	-9.73755e-07	2.58882e-12	4.14335e-12
map-data-2021.01.25-17.48.04.912_1619.jpk-force	1619	9.76563e-07	-5.07812e-07	-7.3391e-09	1.13366e-05	3.83024e-11	-2.79327e-05	-1.02702e-11	-9.81998e-07	1.3862e-11	-9.6199e-07	4.47117e-13	5.9968e-12
map-data-2021.01.25-17.48.04.912_1620.jpk-force	1620	8.98437e-07	-5.07812e-07	-7.37032e-09	1.11627e-05	3.36539e-11	-3.89817e-05	-1.70344e-11	-9.62294e-07	1.88345e-11	-9.81636e-07	-6.48995e-13	9.16968e-12
map-data-2021.01.25-17.48.04.912_1621.jpk-force	1621	8.20312e-07	-5.07812e-07	-7.40055e-09	1.08194e-05	1.39149e-11	-5.63891e-05	-4.57892e-11	-2.02616e-06	2.35082e-11	-1.95441e-06	-1.19964e-11	1.67076e-11
map-data-2021.01.25-17.48.04.912_1622.jpk-force	1622	7.42187e-07	-5.07812e-07	-7.42894e-09	1.10183e-05	-8.70782e-12	-6.14487e-05	-4.08298e-11	-2.36487e-06	2.16073e-11	-2.31681e-06	-1.40111e-11	1.72061e-11
map-data-2021.01.25-17.48.04.912_1623.jpk-force	1623	6.64062e-07	-5.07812e-07	-7.4211e-09	1.10101e-05	1.83384e-12	-5.88495e-05	-4.35597e-11	-2.25099e-06	1.26709e-11	-2.19726e-06	-1.25581e-11	1.34527e-11
map-data-2021.01.25-17.48.04.912_1624.jpk-force	1624	5.85938e-07	-5.07812e-07	-7.39743e-09	1.07418e-05	4.7818e-12	-5.32062e-05	-1.27667e-11	-1.78397e-06	3.67385e-12	-1.78998e-06	-3.12299e-12	4.48891e-12
map-data-2021.01.25-17.48.04.912_1625.jpk-force	1625	5.07813e-07	-5.07812e-07	-7.4222e-09	1.08977e-05	-5.14242e-12	-6.30025e-05	-5.60219e-11	-2.05393e-06	1.04007e-11	-1.98552e-06	-2.64039e-11	1.83605e-11
map-data-2021.01.25-17.48.04.912_1626.jpk-force	1626	4.29687e-07	-5.07812e-07	-7.44783e-09	1.06981e-05	2.59847e-11	-5.14819e-05	-7.717e-12	-1.53442e-06	1.24137e-11	-1.53042e-06	4.50223e-12	5.43001e-12
map-data-2021.01.25-17.48.04.912_1627.jpk-force	1627	3.51563e-07	-5.07812e-07	-7.44756e-09	1.10072e-05	7.39872e-12	-4.91738e-05	-5.33337e-11	-1.9321e-06	1.15965e-11	-1.87672e-06	-2.66497e-11	1.67433e-11
map-data-2021.01.25-17.48.04.912_1628.jpk-force	1628	2.73438e-07	-5.07812e-07	-7.43218e-09	1.10197e-05	2.61555e-12	-6.05788e-05	-9.81796e-12	-1.84195e-06	4.21321e-12	-1.83962e-06	-5.20845e-12	4.01019e-12
map-data-2021.01.25-17.48.04.912_1629.jpk-force	1629	1.95312e-07	-5.07812e-07	-7.43041e-09	1.11127e-05	1.4381e-11	-5.08929e-05	-9.13278e-12	-1.84326e-06	8.97079e-12	-1.83993e-06	-1.7716e-12	4.74211e-12
map-data-2021.01.25-17.48.04.912_1630.jpk-force	1630	1.17187e-07	-5.07812e-07	-7.43084e-09	1.10212e-05	1.13889e-11	-4.96552e-05	-5.19054e-12	-1.84384e-06	1.81809e-12	-1.83984e-06	-1.77615e-12	2.35444e-12
map-data-2021.01.25-17.48.04.912_1631.jpk-force	1631	3.90618e-08	-5.07812e-07	-7.40916e-09	1.07925e-05	-3.91083e-12	-6.05025e-05	-1.63328e-11	-1.841e-06	2.81781e-12	-1.84634e-06	-1.09047e-11	5.74228e-12
map-data-2021.01.25-17.48.04.912_1632.jpk-force	1632	-3.90623e-08	-5.07812e-07	-7.3835e-09	1.06328e-05	4.46013e-12	-5.69325e-05	-1.85642e-11	-1.84288e-06	-2.87482e-13	-1.84622e-06	-1.07683e-11	5.82965e-12
map-data-2021.01.25-17.48.04.912_1633.jpk-force	1633	-1.17187e-07	-5.07812e-07	-7.36033e-09	1.06089e-05	6.25103e-11	-1.6544e-05	-1.31446e-11	-1.84237e-06	1.20747e-11	-1.84637e-06	-3.31384e-12	7.72517e-12
map-data-2021.01.25-17.48.04.912_1634.jpk-force	1634	-1.95313e-07	-5.07812e-07	-7.41933e-09	1.01231e-05	4.73764e-11	-3.59132e-05	-5.86877e-12	-1.84506e-06	5.68749e-12	-1.84005e-06	-1.41645e-12	3.42322e-12
map-data-2021.01.25-17.48.04.912_1635.jpk-force	1635	-2.73438e-07	-5.07812e-07	-7.45555e-09	1.01316e-05	1.72989e-11	-5.38674e-05	-9.86762e-12	-1.84385e-06	1.59882e-11	-1.83985e-06	1.94792e-12	8.78163e-12
map-data-2021.01.25-17.48.04.912_1636.jpk-force	1636	-3.51563e-07	-5.07812e-07	-7.38389e-09	1.0487e-05	-5.09647e-13	-7.294e-05	-1.49904e-11	-1.84541e-06	4.54258e-12	-1.83974e-06	-7.14962e-12	6.10359e-12
map-data-2021.01.25-17.48.04.912_1637.jpk-force	1637	-4.29688e-07	-5.07812e-07	-7.39284e-09	1.02779e-05	1.47661e-11	-3.91059e-05	-4.9071e-11	-9.99292e-07	1.53235e-11	-9.81951e-07	-1.2292e-11	1.84236e-11
map-data-2021.01.25-17.48.04.912_1638.jpk-force	1638	-5.07813e-07	-5.07812e-07	-7.38387e-09	1.04279e-05	1.67654e-11	-4.31684e-05	-1.91488e-11	-9.1031e-07	2.27241e-11	-9.29651e-07	6.83816e-13	7.65743e-12
map-data-2021.01.25-17.48.04.912_1639.jpk-force	1639	-5.85938e-07	-5.07812e-07	-7.36544e-09	1.0558e-05	1.57578e-11	-4.62048e-05	-4.21892e-11	-1.41749e-06	1.62497e-11	-1.3838e-06	-1.52779e-11	1.09613e-11
map-data-2021.01.25-17.48.04.912_1640.jpk-force	1640	-6.64063e-07	-5.07812e-07	-7.40533e-09	1.0432e-05	3.0711e-11	-3.82403e-05	-7.52338e-11	-1.24898e-06	1.42289e-11	-1.20128e-06	-3.50207e-11	3.06595e-11
map-data-2021.01.25-17.48.04.912_1641.jpk-force	1641	-7.42187e-07	-5.07812e-07	-7.39969e-09	9.88411e-06	-5.62717e-13	-0.000119154	-2.23266e-11	-8.42389e-07	1.65195e-11	-8.37719e-07	5.87241e-13	8.0523e-12
map-data-2021.01.25-17.48.04.912_1642.jpk-force	1642	-8.20313e-07	-5.07812e-07	-7.34247e-09	1.02798e-05	1.54563e-11	-4.96956e-05	-6.30021e-11	-1.27115e-06	1.18117e-11	-1.2358e-06	-3.81694e-11	2.08056e-11
map-data-2021.01.25-17.48.04.912_1643.jpk-force	1643	-8.98437e-07	-5.07812e-07	-7.39307e-09	1.00913e-05	2.1695e-11	-6.34295e-05	-5.5931e-11	-2.29868e-06	1.20203e-11	-2.285e-06	-2.68613e-11	1.32579e-11
map-data-2021.01.25-17.48.04.912_1644.jpk-force	1644	-9.76563e-07	-5.07812e-07	-7.46091e-09	1.01465e-05	-2.09188e-11	-9.5937e-05	-1.80033e-11	-1.99896e-06	1.86103e-11	-1.99296e-06	8.79334e-13	8.37707e-12
map-data-2021.01.25-17.48.04.912_1645.jpk-force	1645	-1.05469e-06	-5.07812e-07	-7.35868e-09	1.03877e-05	2.89584e-11	-3.87371e-05	-8.79617e-12	-1.77863e-06	7.49849e-12	-1.7813e-06	5.18399e-13	3.58873e-12
map-data-2021.01.25-17.48.04.912_1646.jpk-force	1646	-1.13281e-06	-5.07812e-07	-7.45727e-09	1.06923e-05	-6.47882e-12	-7.54562e-05	-1.84301e-11	-1.77193e-06	2.95077e-13	-1.78428e-06	-7.92836e-12	4.86795e-12
map-data-2021.01.25-17.48.04.912_1647.jpk-force	1647	-1.21094e-06	-5.07812e-07	-7.41587e-09	1.11713e-05	1.59115e-11	-4.63256e-05	-4.65774e-11	-7.47556e-07	2.2207e-11	-5.84821e-07	-1.00665e-11	1.6637e-11
map-data-2021.01.25-17.48.04.912_1648.jpk-force	1648	-1.28906e-06	-5.07812e-07	-7.36808e-09	1.06203e-05	1.67456e-11	-4.40173e-05	-1.48384e-11	-7.00305e-07	2.31119e-11	-7.56996e-07	3.49199e-12	7.68349e-12
map-data-2021.01.25-17.48.04.912_1649.jpk-force	1649	-1.36719e-06	-5.07812e-07	-7.39764e-09	1.04893e-05	1.74928e-11	-5.0489e-05	-5.67042e-11	-2.00108e-06	1.75206e-11	-1.95203e-06	-2.37077e-11	1.52934e-11
map-data-2021.01.25-17.48.04.912_1650.jpk-force	1650	-1.44531e-06	-5.07812e-07	-7.38479e-09	1.0278e-05	2.07448e-11	-4.86795e-05	-1.65831e-11	-1.95257e-06	2.81227e-11	-2.06269e-06	4.17487e-12	8.65176e-12
map-data-2021.01.25-17.48.04.912_1651.jpk-force	1651	-1.52344e-06	-5.07812e-07	-7.37669e-09	1.07371e-05	1.71164e-11	-6.64513e-05	-1.84819e-11	-8.41322e-07	2.19392e-11	-8.59663e-07	5.82286e-14	8.23812e-12
map-data-2021.01.25-17.48.04.912_1652.jpk-force	1652	-1.60156e-06	-5.07812e-07	-7.37257e-09	1.02991e-05	2.58408e-11	-4.75672e-05	-1.84113e-11	-7.95012e-07	1.60538e-11	-8.37364e-07	9.96956e-13	7.47467e-12
map-data-2021.01.25-17.48.04.912_1653.jpk-force	1653	-1.67969e-06	-5.07812e-07	-7.35578e-09	9.90022e-06	1.06558e-11	-6.63361e-05	-1.09106e-11	-7.29225e-07	1.76677e-11	-7.21221e-07	-2.19919e-13	8.56537e-12
map-data-2021.01.25-17.48.04.912_1654.jpk-force	1654	-1.75781e-06	-5.07812e-07	-7.3913e-09	1.04958e-05	-1.61992e-12	-5.79651e-05	-2.46109e-12	-7.16502e-07	2.97959e-11	-7.21837e-07	8.81104e-12	9.85657e-12
map-data-2021.01.25-17.48.04.912_1655.jpk-force	1655	-1.83594e-06	-5.07812e-07	-7.35889e-09	1.04385e-05	2.46792e-11	-5.26e-05	-1.89452e-11	-7.14295e-07	1.20234e-11	-7.19964e-07	-6.64309e-12	8.57499e-12
map-data-2021.01.25-17.48.04.912_1656.jpk-force	1656	-1.91406e-06	-5.07812e-07	-7.34743e-09	1.02872e-05	1.0529e-11	-5.35247e-05	-8.61664e-12	-7.14326e-07	1.63735e-11	-7.29999e-07	3.22335e-12	6.38085e-12
map-data-2021.01.25-17.48.04.912_1657.jpk-force	1657	-1.99219e-06	-5.07812e-07	-7.35307e-09	1.05219e-05	-1.13997e-11	-5.69065e-05	-4.93794e-12	-7.27278e-07	2.38768e-11	-7.21942e-07	6.39658e-12	8.81509e-12
map-data-2021.01.25-17.48.04.912_1658.jpk-force	1658	-2.07031e-06	-5.07812e-07	-7.35741e-09	9.91535e-06	-2.80372e-11	-0.000114605	-9.78343e-12	-7.31531e-07	9.92746e-12	-7.23861e-07	-6.74768e-13	5.12261e-12
map-data-2021.01.25-17.48.04.912_1659.jpk-force	1659	-2.14844e-06	-5.07812e-07	-7.37252e-09	1.01737e-05	1.80284e-11	-5.39261e-05	-4.23483e-11	-8.19352e-07	-4.09333e-13	-8.12016e-07	-2.72452e-11	8.99913e-12
map-data-2021.01.25-17.48.04.912_1660.jpk-force	1660	-2.22656e-06	-5.07812e-07	-7.3744e-09	1.03893e-05	3.17347e-12	-5.31851e-05	-5.68168e-11	-1.84174e-06	1.81567e-11	-1.65527e-06	-2.83086e-11	1.83763e-11
map-data-2021.01.25-17.48.04.912_1661.jpk-force	1661	-2.30469e-06	-5.07812e-07	-7.38422e-09	1.02373e-05	5.29206e-13	-6.13183e-05	-1.66826e-11	-1.66012e-06	1.67352e-11	-1.65411e-06	9.82521e-13	7.36203e-12
map-data-2021.01.25-17.48.04.912_1662.jpk-force	1662	-2.38281e-06	-5.07812e-07	-7.36638e-09	1.01775e-05	7.4846e-12	-5.5535e-05	-1.53398e-11	-1.64713e-06	2.35168e-11	-1.65381e-06	3.10172e-12	9.47409e-12
map-data-2021.01.25-17.48.04.912_1663.jpk-force	1663	-2.46094e-06	-5.07812e-07	-7.36139e-09	1.0168e-05	1.42876e-11	-6.51274e-05	-1.27111e-11	-1.63659e-06	1.9963e-11	-1.64493e-06	-8.06913e-13	6.80618e-12
map-data-2021.01.25-17.48.04.912_1664.jpk-force	1664	-2.46094e-06	-4.29687e-07	-7.34807e-09	1.02313e-05	-1.91903e-11	-6.13342e-05	-4.4781e-11	-2.69095e-06	2.50599e-11	-2.55245e-06	-1.6413e-11	1.4773e-11
map-data-2021.01.25-17.48.04.912_1665.jpk-force	1665	-2.38281e-06	-4.29687e-07	-7.29791e-09	1.04068e-05	-1.21755e-12	-4.54849e-05	-1.35525e-11	-2.53462e-06	3.54165e-11	-2.80128e-06	8.50301e-12	8.49501e-12
map-data-2021.01.25-17.48.04.912_1666.jpk-force	1666	-2.30469e-06	-4.29687e-07	-7.35593e-09	1.02676e-05	4.74277e-12	-6.35203e-05	-1.05667e-11	-1.91218e-06	2.01059e-11	-1.91919e-06	5.71715e-12	8.66097e-12
map-data-2021.01.25-17.48.04.912_1667.jpk-force	1667	-2.22656e-06	-4.29687e-07	-7.37749e-09	1.02254e-05	2.12953e-11	-5.0374e-05	-7.79025e-12	-1.90116e-06	2.14108e-11	-1.90483e-06	6.43828e-12	9.01231e-12
map-data-2021.01.25-17.48.04.912_1668.jpk-force	1668	-2.14844e-06	-4.29687e-07	-7.33652e-09	1.01656e-05	1.31164e-11	-4.97271e-05	-1.94462e-11	-1.91195e-06	1.37765e-11	-1.90527e-06	6.64936e-13	1.0262e-11
map-data-2021.01.25-17.48.04.912_1669.jpk-force	1669	-2.07031e-06	-4.29687e-07	-7.34473e-09	1.02242e-05	1.6668e-11	-5.13173e-05	-1.53563e-11	-1.9112e-06	1.27113e-11	-1.9062e-06	9.22802e-13	7.29445e-12
map-data-2021.01.25-17.48.04.912_1670.jpk-force	1670	-1.99219e-06	-4.29687e-07	-7.37493e-09	1.02983e-05	8.37485e-12	-5.09769e-05	-1.20836e-11	-1.91041e-06	5.39111e-12	-1.90407e-06	-2.63418e-12	4.8872e-12
map-data-2021.01.25-17.48.04.912_1671.jpk-force	1671	-1.91406e-06	-4.29687e-07	-7.35406e-09	1.03715e-05	1.01329e-11	-5.35083e-05	-1.05826e-11	-1.9098e-06	1.40122e-11	-1.90412e-06	1.8028e-12	6.33903e-12
map-data-2021.01.25-17.48.04.912_1672.jpk-force	1672	-1.83594e-06	-4.29687e-07	-7.45462e-09	1.02798e-05	-5.76349e-11	-0.00012371	-1.48607e-11	-1.91001e-06	2.16266e-11	-1.91935e-06	3.12029e-12	9.55254e-12
map-data-2021.01.25-17.48.04.912_1673.jpk-force	1673	-1.75781e-06	-4.29687e-07	-7.39076e-09	1.12028e-05	2.83238e-12	-4.73665e-05	-1.54853e-11	-1.91006e-06	1.18209e-11	-1.92007e-06	1.41903e-13	7.96249e-12
map-data-2021.01.25-17.48.04.912_1674.jpk-force	1674	-1.67969e-06	-4.29687e-07	-7.40137e-09	1.05514e-05	-3.9148e-11	-0.000115507	-1.41159e-11	-1.91027e-06	1.05993e-11	-1.91961e-06	3.11391e-12	5.832e-12
map-data-2021.01.25-17.48.04.912_1675.jpk-force	1675	-1.60156e-06	-4.29687e-07	-7.3601e-09	9.75852e-06	-3.04578e-11	-0.000124777	-1.69059e-11	-1.2081e-06	1.70889e-11	-1.20343e-06	3.24058e-12	8.41772e-12
map-data-2021.01.25-17.48.04.912_1676.jpk-force	1676	-1.52344e-06	-4.29687e-07	-7.32951e-09	1.0313e-05	-1.40337e-12	-5.91373e-05	-6.1472e-12	-1.20573e-06	2.57529e-11	-1.20106e-06	7.22052e-12	8.12937e-12
map-data-2021.01.25-17.48.04.912_1677.jpk-force	1677	-1.44531e-06	-4.29687e-07	-7.33198e-09	9.65506e-06	5.32341e-11	-5.37174e-05	-7.85734e-11	3.89396e-07	6.22375e-12	3.95732e-07	-4.72166e-11	2.2189e-11
map-data-2021.01.25-17.48.04.912_1678.jpk-force	1678	-1.36719e-06	-4.29687e-07	-7.41346e-09	1.06159e-05	1.74344e-11	-6.51688e-05	-6.53896e-12	-8.92929e-08	1.46239e-11	-8.56246e-08	2.09187e-12	4.96935e-12
map-data-2021.01.25-17.48.04.912_1679.jpk-force	1679	-1.28906e-06	-4.29687e-07	-7.41552e-09	1.06584e-05	1.17056e-11	-8.74347e-05	-1.24414e-11	-1.0253e-07	1.87937e-11	-8.35223e-08	-9.96862e-13	7.59861e-12
map-data-2021.01.25-17.48.04.912_1680.jpk-force	1680	-1.21094e-06	-4.29687e-07	-7.32537e-09	1.07095e-05	1.47965e-11	-5.63773e-05	-1.71277e-11	-1.26948e-07	1.49337e-11	-1.07939e-07	3.62081e-12	7.72837e-12
map-data-2021.01.25-17.48.04.912_1681.jpk-force	1681	-1.13281e-06	-4.29687e-07	-7.32996e-09	9.88733e-06	1.4476e-11	-1.64323e-05	-4.14331e-11	4.11704e-07	2.03628e-11	4.61061e-07	-7.14027e-12	1.97246e-11
map-data-2021.01.25-17.48.04.912_1682.jpk-force	1682	-1.05469e-06	-4.29687e-07	-7.39216e-09	1.06834e-05	5.39527e-12	-7.10999e-05	-5.08113e-11	-2.63903e-06	1.82451e-11	-2.73849e-06	-1.32297e-11	1.61837e-11
map-data-2021.01.25-17.48.04.912_1683.jpk-force	1683	-9.76563e-07	-4.29687e-07	-7.36625e-09	1.10459e-05	2.06697e-11	-4.62285e-05	-3.29637e-11	-1.66043e-06	3.17514e-11	-1.61105e-06	-5.90437e-12	1.20623e-11
map-data-2021.01.25-17.48.04.912_1684.jpk-force	1684	-8.98437e-07	-4.29687e-07	-7.34943e-09	1.05816e-05	1.53524e-11	-5.23559e-05	-8.93784e-12	-1.36528e-06	6.08595e-12	-1.36828e-06	-2.82183e-12	4.92061e-12
map-data-2021.01.25-17.48.04.912_1685.jpk-force	1685	-8.20313e-07	-4.29687e-07	-7.32337e-09	1.08231e-05	-3.76023e-12	-5.69646e-05	-1.28817e-11	-1.3655e-06	1.70624e-11	-1.36851e-06	-4.12194e-12	8.68971e-12
map-data-2021.01.25-17.48.04.912_1686.jpk-force	1686	-7.42187e-07	-4.29687e-07	-7.33524e-09	1.05885e-05	-7.665e-12	-6.43615e-05	-1.71622e-11	-1.36362e-06	1.12902e-12	-1.36796e-06	-8.05203e-12	5.56467e-12
map-data-2021.01.25-17.48.04.912_1687.jpk-force	1687	-6.64063e-07	-4.29687e-07	-7.32791e-09	1.05973e-05	-4.74605e-12	-5.00626e-05	-3.80514e-11	-1.7187e-06	1.97148e-11	-1.67e-06	-1.85973e-11	1.35134e-11
map-data-2021.01.25-17.48.04.912_1688.jpk-force	1688	-5.85938e-07	-4.29687e-07	-7.32703e-09	1.04121e-05	1.06248e-11	-5.02705e-05	-3.13091e-11	-6.26482e-07	2.65901e-11	-5.63122e-07	-1.12418e-11	1.45552e-11
map-data-2021.01.25-17.48.04.912_1689.jpk-force	1689	-5.07813e-07	-4.29687e-07	-7.33128e-09	1.06859e-05	1.15774e-12	-6.02605e-05	-5.30587e-12	-5.00886e-07	1.37029e-11	-4.8788e-07	3.24892e-12	4.77272e-12
map-data-2021.01.25-17.48.04.912_1690.jpk-force	1690	-4.29688e-07	-4.29687e-07	-7.39242e-09	1.07634e-05	1.5368e-11	-6.06705e-05	-7.51297e-12	-4.91602e-07	9.32948e-12	-4.97271e-07	4.6406e-13	5.40046e-12
map-data-2021.01.25-17.48.04.912_1691.jpk-force	1691	-3.51563e-07	-4.29687e-07	-7.35449e-09	1.09187e-05	9.39185e-12	-4.87886e-05	-4.16929e-11	-1.55939e-06	2.54691e-11	-1.46434e-06	-1.02304e-11	1.63544e-11
map-data-2021.01.25-17.48.04.912_1692.jpk-force	1692	-2.73438e-07	-4.29687e-07	-7.32326e-09	8.99334e-06	2.86802e-11	-6.85575e-05	-1.35134e-11	-3.49837e-07	1.56763e-11	-3.31819e-07	3.83792e-13	8.53397e-12
map-data-2021.01.25-17.48.04.912_1693.jpk-force	1693	-1.95313e-07	-4.29687e-07	-7.32053e-09	1.07227e-05	1.12699e-11	-5.63709e-05	-5.11506e-12	-8.57738e-07	6.62915e-12	-8.62407e-07	1.19509e-12	3.11604e-12
map-data-2021.01.25-17.48.04.912_1694.jpk-force	1694	-1.17188e-07	-4.29687e-07	-7.30751e-09	1.09129e-05	2.24337e-11	-3.2655e-05	-9.24478e-12	-8.68069e-07	1.38884e-11	-8.60399e-07	2.26689e-13	7.07245e-12
map-data-2021.01.25-17.48.04.912_1695.jpk-force	1695	-3.90635e-08	-4.29687e-07	-7.34262e-09	1.06445e-05	1.85129e-11	-5.32808e-05	-1.86193e-11	-8.83985e-07	1.03996e-11	-8.69979e-07	-4.54871e-12	6.51466e-12
map-data-2021.01.25-17.48.04.912_1696.jpk-force	1696	3.90618e-08	-4.29687e-07	-7.3134e-09	1.10412e-05	2.17625e-11	-3.46188e-05	-1.40128e-11	-8.74428e-07	1.28304e-11	-8.61089e-07	-2.53532e-13	6.65337e-12
map-data-2021.01.25-17.48.04.912_1697.jpk-force	1697	1.17188e-07	-4.29687e-07	-7.39386e-09	1.06199e-05	1.30236e-11	-6.85496e-05	-8.90166e-12	-8.64404e-07	1.83843e-11	-8.73075e-07	2.60505e-12	7.49219e-12
map-data-2021.01.25-17.48.04.912_1698.jpk-force	1698	1.95312e-07	-4.29687e-07	-7.37149e-09	1.10052e-05	1.56971e-11	-7.5182e-05	-1.46912e-11	-8.62608e-07	1.12202e-11	-8.79616e-07	-1.44138e-13	6.05634e-12
map-data-2021.01.25-17.48.04.912_1699.jpk-force	1699	2.73438e-07	-4.29687e-07	-7.32517e-09	1.06239e-05	1.75748e-11	-5.28635e-05	-1.04411e-11	-8.80013e-07	1.05111e-11	-8.60338e-07	5.25931e-13	5.66436e-12
map-data-2021.01.25-17.48.04.912_1700.jpk-force	1700	3.51562e-07	-4.29687e-07	-7.33655e-09	1.08328e-05	1.80285e-11	-4.29335e-05	-1.70795e-11	-8.60911e-07	2.03045e-12	-8.72583e-07	-7.5608e-12	4.72902e-12
map-data-2021.01.25-17.48.04.912_1701.jpk-force	1701	4.29686e-07	-4.29687e-07	-7.32138e-09	1.06132e-05	1.77533e-11	-3.97118e-05	-6.31096e-12	-8.64311e-07	9.11451e-12	-8.72981e-07	2.05494e-12	3.55707e-12
map-data-2021.01.25-17.48.04.912_1702.jpk-force	1702	5.07812e-07	-4.29687e-07	-7.34388e-09	1.02737e-05	2.12846e-11	-6.55927e-05	-6.98578e-12	-8.72299e-07	2.54261e-11	-8.65962e-07	1.08062e-11	8.43783e-12
map-data-2021.01.25-17.48.04.912_1703.jpk-force	1703	5.85936e-07	-4.29687e-07	-7.31695e-09	9.94657e-06	1.54611e-11	-6.49269e-05	-1.61533e-11	-1.06757e-06	1.97844e-11	-1.03387e-06	2.42504e-12	7.68029e-12
map-data-2021.01.25-17.48.04.912_1704.jpk-force	1704	6.64062e-07	-4.29687e-07	-7.34492e-09	1.07033e-05	-9.83112e-12	-6.83786e-05	-1.67391e-11	-9.7653e-07	2.1273e-11	-1.00988e-06	3.46581e-12	7.51453e-12
map-data-2021.01.25-17.48.04.912_1705.jpk-force	1705	7.42187e-07	-4.29687e-07	-7.32903e-09	1.06835e-05	1.46611e-11	-7.3464e-05	-1.9389e-11	-8.05195e-07	1.48517e-11	-7.87854e-07	1.115e-12	8.65573e-12
map-data-2021.01.25-17.48.04.912_1706.jpk-force	1706	8.20312e-07	-4.29687e-07	-7.33756e-09	1.10404e-05	2.13088e-11	-5.95109e-05	-6.56243e-12	-7.93265e-07	1.43392e-11	-8.03269e-07	3.84844e-12	5.61513e-12
map-data-2021.01.25-17.48.04.912_1707.jpk-force	1707	8.98437e-07	-4.29687e-07	-7.36827e-09	1.07261e-05	4.72061e-12	-6.32405e-05	-1.88673e-11	-7.95981e-07	1.8956e-11	-7.91312e-07	1.72509e-12	9.57136e-12
map-data-2021.01.25-17.48.04.912_1708.jpk-force	1708	9.76562e-07	-4.29687e-07	-7.33865e-09	1.11182e-05	-1.90573e-11	-6.36089e-05	-2.48141e-12	-8.04018e-07	2.54391e-11	-7.93013e-07	1.33553e-11	7.23366e-12
map-data-2021.01.25-17.48.04.912_1709.jpk-force	1709	1.05469e-06	-4.29687e-07	-7.32747e-09	1.07461e-05	-1.08869e-11	-6.83627e-05	-9.23347e-13	-7.9592e-07	1.63294e-11	-7.99255e-07	9.12678e-12	4.79918e-12
map-data-2021.01.25-17.48.04.912_1710.jpk-force	1710	1.13281e-06	-4.29687e-07	-7.33752e-09	1.05063e-05	2.4124e-11	-3.55673e-05	-3.26042e-11	7.88638e-08	1.17894e-11	1.07877e-07	-9.91794e-12	1.17308e-11
map-data-2021.01.25-17.48.04.912_1711.jpk-force	1711	1.21094e-06	-4.29687e-07	-7.29572e-09	9.31969e-06	-1.19325e-11	1.76703e-05	-1.40694e-11	8.87182e-07	1.60296e-11	8.91851e-07	-9.41774e-13	6.85377e-12
map-data-2021.01.25-17.48.04.912_1712.jpk-force	1712	1.28906e-06	-4.29687e-07	-7.27857e-09	1.04419e-05	3.99569e-11	-5.93744e-05	-5.21108e-11	3.98187e-08	1.04982e-11	1.40867e-07	-2.26261e-11	1.62545e-11
map-data-2021.01.25-17.48.04.912_1713.jpk-force	1713	1.36719e-06	-4.29687e-07	-7.26413e-09	1.08836e-05	1.49055e-11	-5.67792e-05	-1.85791e-11	9.32045e-08	2.04929e-11	8.22009e-08	-1.21192e-13	8.47924e-12
map-data-2021.01.25-17.48.04.912_1714.jpk-force	1714	1.44531e-06	-4.29687e-07	-7.32563e-09	1.02763e-05	1.54603e-11	-1.45028e-05	-1.81388e-11	1.02396e-07	1.91293e-11	7.33835e-08	1.85681e-12	7.54337e-12
map-data-2021.01.25-17.48.04.912_1715.jpk-force	1715	1.52344e-06	-4.29687e-07	-7.35214e-09	1.09812e-05	1.25623e-11	-5.80982e-05	-1.65114e-11	1.30257e-07	1.70852e-11	1.35924e-07	1.18152e-12	9.00988e-12
map-data-2021.01.25-17.48.04.912_1716.jpk-force	1716	1.60156e-06	-4.29687e-07	-7.32234e-09	1.09048e-05	1.81484e-11	-3.74869e-05	-1.48887e-11	1.38423e-07	2.18533e-11	1.07409e-07	2.1034e-12	9.12321e-12
map-data-2021.01.25-17.48.04.912_1717.jpk-force	1717	1.67969e-06	-4.29687e-07	-7.297e-09	1.13108e-05	1.62049e-11	-3.92171e-05	-1.10809e-11	1.33516e-07	1.43649e-11	1.36851e-07	1.97799e-12	5.67992e-12
map-data-2021.01.25-17.48.04.912_1718.jpk-force	1718	1.75781e-06	-4.29687e-07	-7.32911e-09	1.12097e-05	1.41646e-11	-5.21705e-05	-6.81394e-11	-2.2098e-06	2.36729e-11	-2.12337e-06	-2.13388e-11	2.57156e-11
map-data-2021.01.25-17.48.04.912_1719.jpk-force	1719	1.83594e-06	-4.29687e-07	-7.32369e-09	1.14569e-05	1.19247e-11	-4.94348e-05	-1.55829e-11	-2.28429e-06	2.50704e-11	-2.11111e-06	3.51103e-12	8.57617e-12
map-data-2021.01.25-17.48.04.912_1720.jpk-force	1720	1.91406e-06	-4.29687e-07	-7.32907e-09	1.13235e-05	9.64537e-12	-5.20908e-05	-1.6284e-11	-1.45478e-06	1.71258e-11	-1.47212e-06	-7.96782e-13	7.16167e-12
map-data-2021.01.25-17.48.04.912_1721.jpk-force	1721	1.99219e-06	-4.29687e-07	-7.33318e-09	1.10418e-05	2.337e-11	-4.23139e-05	-1.16567e-11	-1.46982e-06	2.40356e-11	-1.51285e-06	4.45629e-12	7.34827e-12
map-data-2021.01.25-17.48.04.912_1722.jpk-force	1722	2.07031e-06	-4.29687e-07	-7.35124e-09	1.12054e-05	1.83001e-11	-5.8636e-05	-1.76491e-11	-9.75075e-07	2.40769e-11	-1.01776e-06	2.44549e-12	8.15257e-12
map-data-2021.01.25-17.48.04.912_1723.jpk-force	1723	2.14844e-06	-4.29687e-07	-7.31578e-09	1.12174e-05	2.47967e-11	-3.78802e-05	-1.91507e-11	-1.01291e-06	1.78103e-11	-1.01724e-06	2.04383e-12	6.95733e-12
map-data-2021.01.25-17.48.04.912_1724.jpk-force	1724	2.22656e-06	-4.29687e-07	-7.31395e-09	1.03341e-05	2.30787e-11	-4.1168e-05	-6.30994e-11	-9.9886e-07	1.70205e-11	-9.70837e-07	-2.61295e-11	2.4224e-11
map-data-2021.01.25-17.48.04.912_1725.jpk-force	1725	2.30469e-06	-4.29687e-07	-7.3248e-09	1.1121e-05	1.54721e-11	-4.90921e-05	-1.7593e-11	-9.91392e-07	2.40242e-11	-1.0104e-06	4.90978e-13	9.16928e-12
map-data-2021.01.25-17.48.04.912_1726.jpk-force	1726	2.38281e-06	-4.29687e-07	-7.3597e-09	1.1057e-05	1.11734e-11	-4.90341e-05	-1.6217e-11	-1.05983e-06	7.01418e-12	-1.0545e-06	-5.92404e-12	5.71696e-12
map-data-2021.01.25-17.48.04.912_1727.jpk-force	1727	2.46094e-06	-4.29687e-07	-7.35296e-09	1.1168e-05	1.31724e-11	-5.55612e-05	-2.02443e-11	-1.06511e-06	9.08762e-12	-1.07378e-06	-2.32047e-12	6.33921e-12
map-data-2021.01.25-17.48.04.912_1728.jpk-force	1728	2.46094e-06	-3.51562e-07	-7.36243e-09	1.06846e-05	3.03759e-11	-6.03054e-05	-9.84419e-12	-5.97102e-07	1.69217e-11	-5.79427e-07	2.1433e-12	6.68392e-12
map-data-2021.01.25-17.48.04.912_1729.jpk-force	1729	2.38281e-06	-3.51562e-07	-7.3249e-09	1.11809e-05	1.87418e-11	-4.23533e-05	-1.2986e-11	-5.95854e-07	1.46768e-11	-5.64507e-07	-1.69732e-13	6.64562e-12
map-data-2021.01.25-17.48.04.912_1730.jpk-force	1730	2.30469e-06	-3.51562e-07	-7.30495e-09	1.10676e-05	2.07015e-11	-4.68698e-05	-1.79694e-11	-5.83514e-07	1.92257e-11	-5.78512e-07	8.73584e-13	8.79851e-12
map-data-2021.01.25-17.48.04.912_1731.jpk-force	1731	2.22656e-06	-3.51562e-07	-7.30654e-09	1.11868e-05	8.46068e-12	-6.37169e-05	-1.59662e-11	-6.36793e-07	1.69191e-11	-6.03112e-07	-1.90832e-12	7.35031e-12
map-data-2021.01.25-17.48.04.912_1732.jpk-force	1732	2.14844e-06	-3.51562e-07	-7.32801e-09	1.11724e-05	1.60022e-11	-4.73929e-05	-1.62087e-11	-6.35141e-07	1.09434e-11	-6.4181e-07	-7.54049e-13	6.02172e-12
map-data-2021.01.25-17.48.04.912_1733.jpk-force	1733	2.07031e-06	-3.51562e-07	-7.30526e-09	1.06064e-05	1.59155e-11	-4.91384e-05	-1.50053e-11	-6.36765e-07	2.25121e-11	-6.03081e-07	1.19477e-12	7.16507e-12
map-data-2021.01.25-17.48.04.912_1734.jpk-force	1734	1.99219e-06	-3.51562e-07	-7.32107e-09	1.13357e-05	1.31985e-11	-4.83189e-05	-1.39415e-11	-6.21904e-07	1.77703e-11	-6.41245e-07	3.21844e-12	8.02505e-12
map-data-2021.01.25-17.48.04.912_1735.jpk-force	1735	1.91406e-06	-3.51562e-07	-7.34298e-09	1.02495e-05	4.49663e-11	-2.89401e-05	-1.79603e-11	8.19393e-07	1.82587e-11	8.80087e-07	1.69944e-12	7.96783e-12
map-data-2021.01.25-17.48.04.912_1736.jpk-force	1736	1.83594e-06	-3.51562e-07	-7.31936e-09	1.12383e-05	2.0796e-11	-3.90549e-05	-1.29474e-11	-1.51639e-06	1.67136e-11	-1.49772e-06	4.04999e-13	7.54255e-12
map-data-2021.01.25-17.48.04.912_1737.jpk-force	1737	1.75781e-06	-3.51562e-07	-7.32738e-09	1.10799e-05	-5.33347e-12	-5.95717e-05	-1.99362e-11	-1.88575e-06	1.25818e-11	-1.83638e-06	-1.09703e-12	6.957e-12
map-data-2021.01.25-17.48.04.912_1738.jpk-force	1738	1.67969e-06	-3.51562e-07	-7.34943e-09	1.11867e-05	-3.19337e-11	-5.28474e-05	-1.33175e-11	-1.67438e-06	7.72531e-12	-1.66604e-06	-3.80224e-12	5.72585e-12
map-data-2021.01.25-17.48.04.912_1739.jpk-force	1739	1.60156e-06	-3.51562e-07	-7.3219e-09	1.10276e-05	-9.52651e-12	-5.74911e-05	-5.50812e-11	-1.84226e-06	1.15882e-11	-1.81323e-06	-3.23615e-11	1.56841e-11
map-data-2021.01.25-17.48.04.912_1740.jpk-force	1740	1.52344e-06	-3.51562e-07	-7.31596e-09	1.09373e-05	1.44349e-11	-4.46746e-05	-1.33918e-11	-7.80522e-07	1.09181e-11	-7.99196e-07	-1.45764e-12	6.47635e-12
map-data-2021.01.25-17.48.04.912_1741.jpk-force	1741	1.44531e-06	-3.51562e-07	-7.31853e-09	1.10444e-05	1.45537e-11	-4.22005e-05	-8.83384e-12	-7.96508e-07	7.79694e-12	-7.88171e-07	-1.54512e-12	4.11501e-12
map-data-2021.01.25-17.48.04.912_1742.jpk-force	1742	1.36719e-06	-3.51562e-07	-7.28117e-09	1.11198e-05	2.26504e-11	-3.50788e-05	-7.66165e-12	-7.81326e-07	1.06054e-11	-7.99001e-07	1.21076e-12	5.11268e-12
map-data-2021.01.25-17.48.04.912_1743.jpk-force	1743	1.28906e-06	-3.51562e-07	-7.32215e-09	1.0813e-05	1.22743e-11	-8.42089e-05	-1.38022e-11	-7.81265e-07	5.89235e-12	-7.98606e-07	-4.18735e-12	5.59819e-12
map-data-2021.01.25-17.48.04.912_1744.jpk-force	1744	1.21094e-06	-3.51562e-07	-7.31386e-09	1.09389e-05	1.62278e-11	-4.44869e-05	-1.87405e-11	-7.96321e-07	8.97142e-12	-7.90985e-07	-1.93217e-12	7.20681e-12
map-data-2021.01.25-17.48.04.912_1745.jpk-force	1745	1.13281e-06	-3.51562e-07	-7.31176e-09	1.08948e-05	3.87818e-12	-5.23625e-05	-1.27882e-11	-7.7927e-07	2.18648e-11	-7.99278e-07	3.8952e-12	8.07624e-12
map-data-2021.01.25-17.48.04.912_1746.jpk-force	1746	1.05469e-06	-3.51562e-07	-7.32893e-09	1.07094e-05	2.07642e-11	-4.53149e-05	-6.30938e-12	-1.02845e-06	5.61282e-12	-1.03079e-06	-3.38421e-13	3.26095e-12
map-data-2021.01.25-17.48.04.912_1747.jpk-force	1747	9.76563e-07	-3.51562e-07	-7.36223e-09	1.07585e-05	3.43862e-12	-6.21991e-05	-6.86077e-12	-1.03637e-06	1.95117e-11	-1.0327e-06	8.48632e-12	6.35638e-12
map-data-2021.01.25-17.48.04.912_1748.jpk-force	1748	8.98437e-07	-3.51562e-07	-7.32056e-09	1.09558e-05	2.26712e-11	-3.79214e-05	-8.7424e-12	-1.03501e-06	2.3438e-11	-1.02701e-06	7.50228e-12	1.04066e-11
map-data-2021.01.25-17.48.04.912_1749.jpk-force	1749	8.20312e-07	-3.51562e-07	-7.31299e-09	1.05742e-05	-7.05671e-11	-9.96517e-05	-5.11228e-11	-2.39056e-06	1.44017e-11	-2.33082e-06	-1.46603e-11	1.43899e-11
map-data-2021.01.25-17.48.04.912_1750.jpk-force	1750	7.42187e-07	-3.51562e-07	-7.29059e-09	1.00217e-05	-1.3596e-11	-7.05541e-05	-4.8862e-11	-2.01289e-06	8.34845e-12	-2.00388e-06	-1.12018e-11	1.59765e-11
map-data-2021.01.25-17.48.04.912_1751.jpk-force	1751	6.64062e-07	-3.51562e-07	-7.28987e-09	1.03506e-05	-6.06242e-12	-6.25038e-05	-1.55531e-11	-1.26225e-06	1.82056e-11	-1.25358e-06	-1.12026e-12	8.28278e-12
map-data-2021.01.25-17.48.04.912_1752.jpk-force	1752	5.85938e-07	-3.51562e-07	-7.30818e-09	1.05398e-05	1.83482e-11	-4.85075e-05	-1.44713e-11	-1.27168e-06	1.03009e-11	-1.26634e-06	-5.55888e-13	5.88076e-12
map-data-2021.01.25-17.48.04.912_1753.jpk-force	1753	5.07813e-07	-3.51562e-07	-7.31083e-09	1.06438e-05	1.29452e-11	-5.08182e-05	-1.83194e-11	-1.24867e-06	1.79603e-11	-1.25434e-06	-2.34447e-12	9.41031e-12
map-data-2021.01.25-17.48.04.912_1754.jpk-force	1754	4.29687e-07	-3.51562e-07	-7.34032e-09	1.04567e-05	4.63698e-12	-6.35405e-05	-1.19215e-11	-1.25965e-06	1.65441e-11	-1.2433e-06	3.94575e-12	7.73613e-12
map-data-2021.01.25-17.48.04.912_1755.jpk-force	1755	3.51563e-07	-3.51562e-07	-7.37347e-09	1.06525e-05	-2.18379e-11	-7.41456e-05	-1.43468e-11	-1.25029e-06	2.0569e-11	-1.26897e-06	4.33347e-12	7.22526e-12
map-data-2021.01.25-17.48.04.912_1756.jpk-force	1756	2.73438e-07	-3.51562e-07	-7.32915e-09	1.11431e-05	5.87853e-12	-5.16994e-05	-1.21476e-11	-1.25974e-06	2.2443e-11	-1.2544e-06	4.35173e-12	8.89381e-12
map-data-2021.01.25-17.48.04.912_1757.jpk-force	1757	1.95312e-07	-3.51562e-07	-7.34462e-09	1.06206e-05	1.76682e-11	-5.42965e-05	-1.55159e-11	-1.25793e-06	1.79989e-11	-1.25326e-06	6.60042e-13	1.00724e-11
map-data-2021.01.25-17.48.04.912_1758.jpk-force	1758	1.17187e-07	-3.51562e-07	-7.34269e-09	1.07288e-05	2.94861e-11	-3.71718e-05	-5.60688e-11	1.97192e-07	1.3487e-11	2.67866e-07	-2.93519e-11	1.50165e-11
map-data-2021.01.25-17.48.04.912_1759.jpk-force	1759	3.90618e-08	-3.51562e-07	-7.31241e-09	1.08237e-05	1.32086e-11	-0.00010568	-1.06113e-11	1.15239e-07	2.50559e-11	1.90917e-07	7.12439e-12	7.20375e-12
map-data-2021.01.25-17.48.04.912_1760.jpk-force	1760	-3.90623e-08	-3.51562e-07	-7.29457e-09	1.07866e-05	6.36813e-12	-6.02176e-05	-8.03576e-12	-9.06803e-07	1.86797e-11	-9.25477e-07	5.02396e-12	6.17581e-12
map-data-2021.01.25-17.48.04.912_1761.jpk-force	1761	-1.17187e-07	-3.51562e-07	-7.43386e-09	1.08995e-05	1.69853e-11	-8.63826e-05	-4.58309e-11	-2.45533e-06	7.94229e-12	-2.55178e-06	-1.6087e-11	9.23653e-12
map-data-2021.01.25-17.48.04.912_1762.jpk-force	1762	-1.95313e-07	-3.51562e-07	-7.2904e-09	1.00208e-05	1.14042e-11	-4.63955e-05	-1.63642e-11	-8.40209e-07	1.3131e-11	-8.35873e-07	-1.95255e-12	9.42312e-12
map-data-2021.01.25-17.48.04.912_1763.jpk-force	1763	-2.73438e-07	-3.51562e-07	-7.27646e-09	1.06967e-05	1.91658e-11	-4.61872e-05	-6.60129e-12	-8.40232e-07	6.94097e-12	-8.30895e-07	1.1606e-13	3.85655e-12
map-data-2021.01.25-17.48.04.912_1764.jpk-force	1764	-3.51563e-07	-3.51562e-07	-7.31009e-09	1.05e-05	1.62231e-11	-5.44133e-05	-1.23557e-11	-8.32359e-07	1.93098e-11	-8.27357e-07	1.53871e-12	7.53169e-12
map-data-2021.01.25-17.48.04.912_1765.jpk-force	1765	-4.29688e-07	-3.51562e-07	-7.36402e-09	1.12497e-05	2.90106e-11	-4.37027e-05	-1.8239e-11	-8.29279e-07	9.43321e-12	-8.23943e-07	-4.60832e-12	7.12081e-12
map-data-2021.01.25-17.48.04.912_1766.jpk-force	1766	-5.07813e-07	-3.51562e-07	-7.35501e-09	1.13225e-05	7.23399e-12	-5.22491e-05	-4.59154e-11	-2.0004e-06	1.73408e-11	-1.92833e-06	-1.26451e-11	1.54126e-11
map-data-2021.01.25-17.48.04.912_1767.jpk-force	1767	-5.85938e-07	-3.51562e-07	-7.3738e-09	1.06552e-05	1.20837e-11	-6.78036e-05	-1.75505e-11	-3.11686e-07	1.89509e-11	-3.06684e-07	2.27837e-12	8.70629e-12
map-data-2021.01.25-17.48.04.912_1768.jpk-force	1768	-6.64063e-07	-3.51562e-07	-7.33214e-09	1.05625e-05	2.69712e-11	-2.64137e-05	-6.23951e-12	-3.15603e-07	1.87827e-11	-3.05932e-07	4.32927e-12	5.84172e-12
map-data-2021.01.25-17.48.04.912_1769.jpk-force	1769	-7.42187e-07	-3.51562e-07	-7.31475e-09	1.07359e-05	1.35883e-11	-4.07724e-05	-1.42664e-11	-3.25469e-07	1.04249e-11	-3.16798e-07	1.72594e-12	5.36154e-12
map-data-2021.01.25-17.48.04.912_1770.jpk-force	1770	-8.20313e-07	-3.51562e-07	-7.33971e-09	1.04719e-05	1.01416e-11	-6.30122e-05	-1.03848e-11	-3.21387e-07	2.00901e-11	-3.04379e-07	2.05885e-12	6.9015e-12
map-data-2021.01.25-17.48.04.912_1771.jpk-force	1771	-8.98437e-07	-3.51562e-07	-7.34454e-09	1.0922e-05	1.61124e-11	-5.63118e-05	-7.10342e-12	-3.73669e-07	1.64237e-11	-3.69667e-07	3.22233e-12	5.78574e-12
map-data-2021.01.25-17.48.04.912_1772.jpk-force	1772	-9.76563e-07	-3.51562e-07	-7.33837e-09	1.00886e-05	5.64276e-11	-5.8076e-05	-6.24063e-11	1.86343e-07	1.34398e-11	2.67716e-07	-3.6231e-11	1.99341e-11
map-data-2021.01.25-17.48.04.912_1773.jpk-force	1773	-1.05469e-06	-3.51562e-07	-7.29642e-09	1.0953e-05	1.99421e-11	-3.68106e-05	-1.95634e-11	-9.56571e-07	8.41334e-12	-9.40564e-07	-3.6556e-12	7.0628e-12
map-data-2021.01.25-17.48.04.912_1774.jpk-force	1774	-1.13281e-06	-3.51562e-07	-7.36661e-09	1.06274e-05	9.96531e-11	-1.20272e-05	-1.49497e-11	-1.96364e-06	6.32789e-12	-1.93862e-06	-2.78805e-12	6.12793e-12
map-data-2021.01.25-17.48.04.912_1775.jpk-force	1775	-1.21094e-06	-3.51562e-07	-7.31296e-09	1.04256e-05	-2.85732e-11	-7.97891e-05	-5.92733e-12	-1.18204e-06	1.55884e-11	-1.18671e-06	6.48002e-12	6.24483e-12
map-data-2021.01.25-17.48.04.912_1776.jpk-force	1776	-1.28906e-06	-3.51562e-07	-7.29925e-09	1.03823e-05	2.33297e-11	-2.6245e-05	-1.3215e-11	-7.62432e-07	1.48213e-11	-7.56429e-07	4.07043e-13	8.14577e-12
map-data-2021.01.25-17.48.04.912_1777.jpk-force	1777	-1.36719e-06	-3.51562e-07	-7.26169e-09	1.03555e-05	1.58936e-11	-4.3935e-05	-6.64298e-12	-7.64286e-07	1.47193e-11	-7.60618e-07	4.02274e-12	5.91594e-12
map-data-2021.01.25-17.48.04.912_1778.jpk-force	1778	-1.44531e-06	-3.51562e-07	-7.28577e-09	1.04045e-05	1.51161e-11	-4.94625e-05	-1.0797e-11	-7.64823e-07	5.60338e-12	-7.57153e-07	-1.17236e-12	4.8576e-12
map-data-2021.01.25-17.48.04.912_1779.jpk-force	1779	-1.52344e-06	-3.51562e-07	-7.30502e-09	1.03367e-05	-3.40408e-11	-7.41697e-05	-7.13242e-11	-2.45445e-06	6.76409e-12	-2.45011e-06	-2.87814e-11	2.33937e-11
map-data-2021.01.25-17.48.04.912_1780.jpk-force	1780	-1.60156e-06	-3.51562e-07	-7.32673e-09	1.05341e-05	-3.82582e-11	-7.38316e-05	-8.48499e-12	-2.43895e-06	1.35383e-11	-2.47132e-06	1.89114e-12	5.21933e-12
map-data-2021.01.25-17.48.04.912_1781.jpk-force	1781	-1.67969e-06	-3.51562e-07	-7.3129e-09	1.01233e-05	8.72621e-12	-5.83005e-05	-4.98209e-11	-1.89809e-06	1.68325e-11	-1.83536e-06	-1.77749e-11	1.4667e-11
map-data-2021.01.25-17.48.04.912_1782.jpk-force	1782	-1.75781e-06	-3.51562e-07	-7.3222e-09	1.05994e-05	6.25244e-12	-6.07083e-05	-1.19266e-11	-1.56149e-06	1.85369e-11	-1.55682e-06	3.17227e-12	6.82929e-12
map-data-2021.01.25-17.48.04.912_1783.jpk-force	1783	-1.83594e-06	-3.51562e-07	-7.30652e-09	9.5029e-06	2.12916e-11	1.9136e-06	-1.35493e-11	-1.95737e-07	2.42377e-11	-2.00405e-07	4.36432e-12	7.91994e-12
map-data-2021.01.25-17.48.04.912_1784.jpk-force	1784	-1.91406e-06	-3.51562e-07	-7.30697e-09	1.00876e-05	1.99408e-11	-4.06414e-05	-1.75011e-11	-2.4824e-07	1.6716e-11	-1.88545e-07	-2.35578e-12	7.41442e-12
map-data-2021.01.25-17.48.04.912_1785.jpk-force	1785	-1.99219e-06	-3.51562e-07	-7.29703e-09	1.03731e-05	7.89596e-12	-5.05104e-05	-1.21015e-11	-2.44718e-07	2.17015e-11	-2.40717e-07	3.16631e-12	6.67116e-12
map-data-2021.01.25-17.48.04.912_1786.jpk-force	1786	-2.07031e-06	-3.51562e-07	-7.29662e-09	1.04063e-05	7.05705e-12	-5.12488e-05	-4.31908e-11	-1.40187e-06	1.91358e-11	-1.26047e-06	-1.77673e-11	1.55283e-11
map-data-2021.01.25-17.48.04.912_1787.jpk-force	1787	-2.14844e-06	-3.51562e-07	-7.26322e-09	9.83701e-06	1.71932e-11	-3.75504e-05	-5.51376e-12	-1.43008e-06	4.5012e-11	-1.27896e-06	1.52548e-11	8.16011e-12
map-data-2021.01.25-17.48.04.912_1788.jpk-force	1788	-2.22656e-06	-3.51562e-07	-7.23963e-09	8.4641e-06	2.90928e-11	-5.14076e-06	-1.00908e-11	1.33e-06	9.60467e-12	1.325e-06	-1.72124e-12	4.7856e-12
map-data-2021.01.25-17.48.04.912_1789.jpk-force	1789	-2.30469e-06	-3.51562e-07	-7.36784e-09	1.02395e-05	2.12065e-11	-6.03273e-05	-1.08947e-11	-9.70682e-07	2.05208e-11	-9.51674e-07	3.76466e-12	8.77657e-12
map-data-2021.01.25-17.48.04.912_1790.jpk-force	1790	-2.38281e-06	-3.51562e-07	-7.32596e-09	1.09641e-05	3.10296e-11	-1.29447e-05	-1.07355e-11	-9.5257e-07	1.87367e-11	-9.57572e-07	4.52863e-12	7.91741e-12
map-data-2021.01.25-17.48.04.912_1791.jpk-force	1791	-2.46094e-06	-3.51562e-07	-7.29155e-09	9.41372e-06	1.44929e-11	-5.03256e-05	-6.58622e-12	-9.7649e-07	2.96626e-11	-9.7082e-07	9.50912e-12	8.23878e-12
map-data-2021.01.25-17.48.04.912_1792.jpk-force	1792	-2.46094e-06	-2.73437e-07	-7.28206e-09	1.01821e-05	1.86576e-11	-4.87372e-05	-1.15421e-11	-9.45706e-07	1.05295e-11	-9.50375e-07	-4.3911e-13	4.52891e-12
map-data-2021.01.25-17.48.04.912_1793.jpk-force	1793	-2.38281e-06	-2.73437e-07	-7.25927e-09	1.02405e-05	2.28934e-11	-3.77139e-05	-1.3827e-11	-9.52228e-07	1.4741e-11	-9.3989e-07	-1.39349e-12	6.60714e-12
map-data-2021.01.25-17.48.04.912_1794.jpk-force	1794	-2.30469e-06	-2.73437e-07	-7.27003e-09	9.43316e-06	2.31302e-11	-7.7494e-05	-1.26587e-11	-2.02294e-07	1.63613e-11	-2.38976e-07	2.16752e-12	6.54245e-12
map-data-2021.01.25-17.48.04.912_1795.jpk-force	1795	-2.22656e-06	-2.73437e-07	-7.24667e-09	1.00409e-05	1.49143e-11	-6.03259e-05	-6.83219e-11	-2.6626e-06	1.26135e-11	-2.60454e-06	-2.13908e-11	1.87324e-11
map-data-2021.01.25-17.48.04.912_1796.jpk-force	1796	-2.14844e-06	-2.73437e-07	-7.28043e-09	9.98542e-06	1.82634e-11	-5.15709e-05	-1.89625e-11	-1.06537e-06	1.86207e-11	-1.08438e-06	-2.52181e-12	7.23012e-12
map-data-2021.01.25-17.48.04.912_1797.jpk-force	1797	-2.07031e-06	-2.73437e-07	-7.27469e-09	9.74827e-06	4.27617e-11	-3.83535e-05	-5.13826e-11	9.12861e-08	7.12747e-12	9.89563e-08	-3.07781e-11	1.19987e-11
map-data-2021.01.25-17.48.04.912_1798.jpk-force	1798	-1.99219e-06	-2.73437e-07	-7.29326e-09	1.00985e-05	1.52976e-11	-6.60589e-05	-1.37464e-11	9.12938e-08	2.54501e-11	9.59624e-08	5.25607e-12	8.96789e-12
map-data-2021.01.25-17.48.04.912_1799.jpk-force	1799	-1.91406e-06	-2.73437e-07	-7.34128e-09	9.54976e-06	6.17629e-11	-5.33007e-05	-6.52262e-11	5.47972e-07	1.55029e-11	5.90326e-07	-2.90405e-11	2.35588e-11
map-data-2021.01.25-17.48.04.912_1800.jpk-force	1800	-1.83594e-06	-2.73437e-07	-7.2866e-09	9.03877e-06	1.75028e-11	-9.58015e-05	-1.28788e-11	-7.48895e-07	1.90228e-11	-7.57237e-07	4.3595e-12	8.27704e-12
map-data-2021.01.25-17.48.04.912_1801.jpk-force	1801	-1.75781e-06	-2.73437e-07	-7.28324e-09	9.36348e-06	-1.06869e-12	-9.70624e-05	-1.71648e-11	-7.65198e-07	2.21838e-11	-7.46185e-07	1.46191e-12	1.04312e-11
map-data-2021.01.25-17.48.04.912_1802.jpk-force	1802	-1.67969e-06	-2.73437e-07	-7.27359e-09	1.02703e-05	1.81521e-11	-5.20526e-05	-1.59808e-11	-7.51505e-08	5.81371e-12	-8.51552e-08	-4.26745e-12	4.31716e-12
map-data-2021.01.25-17.48.04.912_1803.jpk-force	1803	-1.60156e-06	-2.73437e-07	-7.27486e-09	1.02101e-05	1.88043e-11	-4.94058e-05	-5.18631e-11	-6.96645e-07	1.48274e-11	-6.78637e-07	-1.97555e-11	1.65712e-11
map-data-2021.01.25-17.48.04.912_1804.jpk-force	1804	-1.52344e-06	-2.73437e-07	-7.29579e-09	1.03398e-05	-1.06227e-11	-7.33769e-05	-1.39417e-11	-1.79376e-06	8.23884e-12	-1.8121e-06	-3.57257e-12	4.38705e-12
map-data-2021.01.25-17.48.04.912_1805.jpk-force	1805	-1.44531e-06	-2.73437e-07	-7.25496e-09	9.93689e-06	-2.76764e-11	-6.93135e-05	-8.36604e-12	-1.80259e-06	2.23007e-11	-1.78223e-06	2.32901e-12	7.01e-12
map-data-2021.01.25-17.48.04.912_1806.jpk-force	1806	-1.36719e-06	-2.73437e-07	-7.34159e-09	1.02245e-05	-5.25308e-11	-0.000107026	-1.32036e-11	-1.80412e-06	2.00485e-11	-1.79845e-06	1.66427e-12	7.61588e-12
map-data-2021.01.25-17.48.04.912_1807.jpk-force	1807	-1.28906e-06	-2.73437e-07	-7.30341e-09	1.08511e-05	-8.69625e-11	-9.49046e-05	-1.24245e-11	-1.80186e-06	1.90404e-11	-1.78452e-06	8.89455e-14	7.95959e-12
map-data-2021.01.25-17.48.04.912_1808.jpk-force	1808	-1.21094e-06	-2.73437e-07	-7.25782e-09	1.04312e-05	1.23917e-11	-4.65745e-05	-9.86453e-12	-1.79645e-06	1.44361e-11	-1.78444e-06	-6.30297e-13	6.09159e-12
map-data-2021.01.25-17.48.04.912_1809.jpk-force	1809	-1.13281e-06	-2.73437e-07	-7.2495e-09	9.69833e-06	-1.76748e-11	-8.69926e-05	-1.00941e-11	-1.80325e-06	2.3397e-11	-1.78557e-06	6.45162e-12	8.00282e-12
map-data-2021.01.25-17.48.04.912_1810.jpk-force	1810	-1.05469e-06	-2.73437e-07	-7.24455e-09	9.40687e-06	2.80731e-12	-6.61921e-05	-5.82586e-12	-1.79813e-06	2.3034e-11	-1.78211e-06	6.63762e-12	7.41149e-12
map-data-2021.01.25-17.48.04.912_1811.jpk-force	1811	-9.76563e-07	-2.73437e-07	-7.29826e-09	1.03867e-05	-4.43963e-12	-6.48754e-05	-1.42174e-11	-1.80999e-06	1.54083e-11	-1.79998e-06	5.82992e-13	7.33748e-12
map-data-2021.01.25-17.48.04.912_1812.jpk-force	1812	-8.98437e-07	-2.73437e-07	-7.25723e-09	9.91501e-06	-3.06069e-11	-6.59519e-05	-1.02288e-11	-1.8056e-06	1.3928e-11	-1.78258e-06	1.67685e-13	6.63757e-12
map-data-2021.01.25-17.48.04.912_1813.jpk-force	1813	-8.20313e-07	-2.73437e-07	-7.29291e-09	1.0326e-05	9.80157e-13	-6.32174e-05	-8.52664e-12	-1.78767e-06	1.64305e-11	-1.78367e-06	1.01831e-12	5.81798e-12
map-data-2021.01.25-17.48.04.912_1814.jpk-force	1814	-7.42187e-07	-2.73437e-07	-7.27381e-09	1.01392e-05	-3.27913e-12	-7.05302e-05	-1.52239e-11	-1.78234e-06	1.54232e-11	-1.78567e-06	8.41942e-13	6.27784e-12
map-data-2021.01.25-17.48.04.912_1815.jpk-force	1815	-6.64063e-07	-2.73437e-07	-7.25787e-09	9.87166e-06	7.32225e-12	-5.24668e-05	-1.86238e-11	-1.80421e-06	1.27022e-12	-1.79387e-06	-6.63461e-12	5.04437e-12
map-data-2021.01.25-17.48.04.912_1816.jpk-force	1816	-5.85938e-07	-2.73437e-07	-7.34105e-09	1.02628e-05	8.01648e-11	-5.74984e-05	-2.09204e-11	-1.79413e-06	1.32808e-11	-1.7988e-06	-7.46677e-13	8.78932e-12
map-data-2021.01.25-17.48.04.912_1817.jpk-force	1817	-5.07813e-07	-2.73437e-07	-7.33165e-09	1.13453e-05	-1.254e-10	-0.000128348	-2.68443e-11	-1.79483e-06	9.17415e-12	-1.81185e-06	-9.4636e-12	7.80385e-12
map-data-2021.01.25-17.48.04.912_1818.jpk-force	1818	-4.29688e-07	-2.73437e-07	-7.29729e-09	1.07023e-05	1.86e-11	-5.5355e-05	-1.6922e-11	-1.79455e-06	1.03353e-11	-1.79022e-06	-2.76704e-12	6.9082e-12
map-data-2021.01.25-17.48.04.912_1819.jpk-force	1819	-3.51563e-07	-2.73437e-07	-7.22584e-09	1.01632e-05	6.40099e-12	-5.42427e-05	-4.38101e-11	-1.90777e-06	1.42182e-11	-1.82636e-06	-1.27086e-11	1.20421e-11
map-data-2021.01.25-17.48.04.912_1820.jpk-force	1820	-2.73438e-07	-2.73437e-07	-7.22019e-09	1.01915e-05	8.77971e-13	-6.58127e-05	-1.46729e-11	-1.83563e-06	2.38097e-11	-1.99246e-06	4.00545e-12	7.69434e-12
map-data-2021.01.25-17.48.04.912_1821.jpk-force	1821	-1.95313e-07	-2.73437e-07	-7.24284e-09	1.022e-05	-5.03778e-12	-6.12901e-05	-1.42151e-11	-1.03644e-06	1.49346e-11	-1.05512e-06	3.01297e-13	6.73846e-12
map-data-2021.01.25-17.48.04.912_1822.jpk-force	1822	-1.17188e-07	-2.73437e-07	-7.25912e-09	1.02856e-05	-5.99814e-13	-6.53127e-05	-1.31555e-11	-1.67963e-06	2.1135e-11	-1.69898e-06	8.16197e-13	7.23107e-12
map-data-2021.01.25-17.48.04.912_1823.jpk-force	1823	-3.90635e-08	-2.73437e-07	-7.25562e-09	1.03107e-05	1.2361e-11	-5.2593e-05	-1.62219e-11	-1.69566e-06	2.1997e-11	-1.67764e-06	-2.83502e-13	1.06917e-11
map-data-2021.01.25-17.48.04.912_1824.jpk-force	1824	3.90618e-08	-2.73437e-07	-7.2988e-09	1.03699e-05	4.79483e-11	-5.67781e-05	-5.18736e-11	-1.78218e-06	2.35282e-11	-1.65675e-06	-1.22719e-11	1.60595e-11
map-data-2021.01.25-17.48.04.912_1825.jpk-force	1825	1.17188e-07	-2.73437e-07	-7.28071e-09	1.03754e-05	6.35205e-12	-6.64414e-05	-7.03298e-12	-1.75206e-06	7.22594e-12	-1.74872e-06	-2.01293e-12	3.85815e-12
map-data-2021.01.25-17.48.04.912_1826.jpk-force	1826	1.95312e-07	-2.73437e-07	-7.29083e-09	1.06179e-05	3.58653e-12	-6.09209e-05	-9.08557e-12	-1.75505e-06	5.18423e-12	-1.74871e-06	-3.00231e-12	3.67241e-12
map-data-2021.01.25-17.48.04.912_1827.jpk-force	1827	2.73438e-07	-2.73437e-07	-7.29816e-09	1.06702e-05	-3.11166e-12	-5.97627e-05	-3.94554e-11	-2.54796e-06	2.51e-11	-2.47453e-06	-5.54914e-12	1.36725e-11
map-data-2021.01.25-17.48.04.912_1828.jpk-force	1828	3.51562e-07	-2.73437e-07	-7.27992e-09	1.02058e-05	1.86646e-11	-4.99077e-05	-4.56363e-11	-1.74047e-06	2.02145e-11	-1.57634e-06	-1.28172e-11	1.35752e-11
map-data-2021.01.25-17.48.04.912_1829.jpk-force	1829	4.29686e-07	-2.73437e-07	-7.27411e-09	9.23735e-06	5.0044e-11	-3.67642e-05	-1.53425e-11	8.92804e-07	1.82643e-11	8.75463e-07	-8.30103e-13	7.80499e-12
map-data-2021.01.25-17.48.04.912_1830.jpk-force	1830	5.07812e-07	-2.73437e-07	-7.27019e-09	1.02042e-05	8.47287e-12	-5.64413e-05	-1.51511e-11	-1.2193e-06	1.54318e-11	-1.21363e-06	1.56686e-12	7.65749e-12
map-data-2021.01.25-17.48.04.912_1831.jpk-force	1831	5.85936e-07	-2.73437e-07	-7.25728e-09	1.01992e-05	1.71159e-11	-4.50701e-05	-1.21413e-11	-1.24921e-06	1.33803e-11	-1.21452e-06	-1.89744e-12	5.86864e-12
map-data-2021.01.25-17.48.04.912_1832.jpk-force	1832	6.64062e-07	-2.73437e-07	-7.23709e-09	1.03105e-05	-2.00194e-12	-5.8158e-05	-1.00897e-11	-1.2238e-06	1.17672e-11	-1.21346e-06	-7.50227e-15	4.29369e-12
map-data-2021.01.25-17.48.04.912_1833.jpk-force	1833	7.42187e-07	-2.73437e-07	-7.25834e-09	9.72905e-06	3.82746e-11	-5.61693e-05	-4.17733e-11	6.99531e-10	6.47159e-12	4.97215e-08	-1.68039e-11	1.11525e-11
map-data-2021.01.25-17.48.04.912_1834.jpk-force	1834	8.20312e-07	-2.73437e-07	-7.27565e-09	1.04426e-05	5.8718e-12	-5.57123e-05	-1.38884e-11	1.16132e-08	2.56435e-11	-6.39495e-09	8.07629e-12	7.63e-12
map-data-2021.01.25-17.48.04.912_1835.jpk-force	1835	8.98437e-07	-2.73437e-07	-7.29942e-09	1.05161e-05	-4.86818e-12	-7.1194e-05	-1.53045e-11	-1.25047e-06	1.21949e-11	-1.2538e-06	-3.60895e-12	8.49863e-12
map-data-2021.01.25-17.48.04.912_1836.jpk-force	1836	9.76562e-07	-2.73437e-07	-7.2756e-09	1.03205e-05	2.29134e-11	-4.60969e-05	-1.2204e-11	-1.24292e-06	1.75616e-11	-1.23892e-06	2.35435e-13	6.94068e-12
map-data-2021.01.25-17.48.04.912_1837.jpk-force	1837	1.05469e-06	-2.73437e-07	-7.27763e-09	1.04599e-05	2.43776e-11	-4.29667e-05	-9.08159e-12	-8.99965e-07	1.34356e-11	-9.043e-07	-8.64224e-13	5.39639e-12
map-data-2021.01.25-17.48.04.912_1838.jpk-force	1838	1.13281e-06	-2.73437e-07	-7.35233e-09	1.06672e-05	1.36352e-11	-6.28863e-05	-6.20302e-11	-1.20416e-06	8.38618e-12	-1.17581e-06	-2.61696e-11	2.32873e-11
map-data-2021.01.25-17.48.04.912_1839.jpk-force	1839	1.21094e-06	-2.73437e-07	-7.29048e-09	9.23843e-06	8.54087e-11	-5.95304e-05	-1.38382e-11	8.18386e-07	-5.90021e-12	8.21054e-07	-1.00211e-11	2.56e-12
map-data-2021.01.25-17.48.04.912_1840.jpk-force	1840	1.28906e-06	-2.73437e-07	-7.21914e-09	1.05597e-05	1.46535e-11	-3.97717e-05	-1.3533e-11	-7.26665e-07	2.55801e-11	-7.21996e-07	8.13265e-12	9.09273e-12
map-data-2021.01.25-17.48.04.912_1841.jpk-force	1841	1.36719e-06	-2.73437e-07	-7.24511e-09	1.0441e-05	1.82647e-11	-4.05348e-05	-1.01294e-11	-7.40479e-07	1.8568e-11	-7.09132e-07	-1.50953e-12	5.57419e-12
map-data-2021.01.25-17.48.04.912_1842.jpk-force	1842	1.44531e-06	-2.73437e-07	-7.27069e-09	1.06558e-05	1.22734e-12	-6.10133e-05	-6.74011e-11	-2.28319e-06	1.56673e-11	-2.24649e-06	-3.49168e-11	2.5632e-11
map-data-2021.01.25-17.48.04.912_1843.jpk-force	1843	1.52344e-06	-2.73437e-07	-7.27448e-09	1.01964e-05	4.31104e-12	-6.83987e-05	-9.06398e-12	-7.52062e-07	2.59639e-11	-7.59399e-07	2.97219e-12	8.81749e-12
map-data-2021.01.25-17.48.04.912_1844.jpk-force	1844	1.60156e-06	-2.73437e-07	-7.27342e-09	9.14712e-06	8.30119e-11	-4.87995e-05	-1.24124e-11	8.04127e-07	1.99369e-11	7.62776e-07	1.50979e-12	8.04402e-12
map-data-2021.01.25-17.48.04.912_1845.jpk-force	1845	1.67969e-06	-2.73437e-07	-7.30006e-09	1.04617e-05	2.18079e-11	-5.31727e-05	-4.94796e-11	-2.45412e-06	1.8108e-11	-2.42508e-06	-1.48674e-11	1.34434e-11
map-data-2021.01.25-17.48.04.912_1846.jpk-force	1846	1.75781e-06	-2.73437e-07	-7.32537e-09	1.01917e-05	3.76408e-11	-5.12158e-05	-5.00312e-11	-2.24933e-06	9.31012e-12	-2.21428e-06	-2.1858e-11	1.90754e-11
map-data-2021.01.25-17.48.04.912_1847.jpk-force	1847	1.83594e-06	-2.73437e-07	-7.27082e-09	1.03875e-05	5.07642e-11	-2.98039e-05	-1.45311e-11	-2.24948e-06	1.07488e-11	-2.22912e-06	-8.25793e-13	5.71035e-12
map-data-2021.01.25-17.48.04.912_1848.jpk-force	1848	1.91406e-06	-2.73437e-07	-7.3695e-09	9.85274e-06	2.2207e-11	-5.43608e-05	-1.09361e-11	-7.27385e-07	1.62186e-11	-7.34055e-07	2.39838e-12	7.45827e-12
map-data-2021.01.25-17.48.04.912_1849.jpk-force	1849	1.99219e-06	-2.73437e-07	-7.32645e-09	8.83774e-06	2.53329e-11	-2.75159e-05	-9.00374e-12	-3.21042e-07	2.73669e-11	-3.17373e-07	1.26072e-11	1.25131e-11
map-data-2021.01.25-17.48.04.912_1850.jpk-force	1850	2.07031e-06	-2.73437e-07	-7.29954e-09	1.01355e-05	5.62678e-12	-5.99235e-05	-1.78089e-11	-1.01332e-06	1.90015e-11	-1.01799e-06	4.36511e-13	7.40295e-12
map-data-2021.01.25-17.48.04.912_1851.jpk-force	1851	2.14844e-06	-2.73437e-07	-7.30822e-09	1.06521e-05	-2.79588e-12	-7.14035e-05	-1.18144e-11	-1.06231e-06	1.73667e-11	-1.00695e-06	1.24007e-12	6.90573e-12
map-data-2021.01.25-17.48.04.912_1852.jpk-force	1852	2.22656e-06	-2.73437e-07	-7.30964e-09	1.02357e-05	3.9303e-11	-2.95787e-05	-1.42979e-11	-1.03863e-06	1.97021e-11	-1.01728e-06	-4.52063e-13	8.01424e-12
map-data-2021.01.25-17.48.04.912_1853.jpk-force	1853	2.30469e-06	-2.73437e-07	-7.27051e-09	1.01361e-05	-1.15241e-11	-6.24896e-05	-1.511e-11	-1.06685e-06	1.67177e-11	-1.0285e-06	1.47985e-12	7.12919e-12
map-data-2021.01.25-17.48.04.912_1854.jpk-force	1854	2.38281e-06	-2.73437e-07	-7.29029e-09	1.04021e-05	8.784e-12	-5.65685e-05	-1.25394e-11	-1.05264e-06	1.36095e-11	-1.04864e-06	3.94412e-14	5.22108e-12
map-data-2021.01.25-17.48.04.912_1855.jpk-force	1855	2.46094e-06	-2.73437e-07	-7.27899e-09	9.88769e-06	-1.84687e-11	-8.90656e-05	-1.6277e-11	-9.97946e-07	2.05296e-11	-1.04097e-06	1.42414e-13	9.00045e-12
map-data-2021.01.25-17.48.04.912_1856.jpk-force	1856	2.46094e-06	-1.95312e-07	-7.26509e-09	9.95487e-06	2.03541e-11	-6.22668e-05	-1.15676e-11	-1.35627e-07	9.6352e-12	-1.32626e-07	-3.38485e-12	6.56639e-12
map-data-2021.01.25-17.48.04.912_1857.jpk-force	1857	2.38281e-06	-1.95312e-07	-7.27475e-09	1.00698e-05	2.07384e-11	-6.43356e-05	-9.92502e-12	-1.36658e-07	3.19359e-12	-1.3399e-07	-2.91701e-12	4.32557e-12
map-data-2021.01.25-17.48.04.912_1858.jpk-force	1858	2.30469e-06	-1.95312e-07	-7.29986e-09	1.01859e-05	1.0727e-11	-5.93335e-05	-2.24247e-12	-1.3747e-07	1.5129e-11	-1.32801e-07	5.07129e-12	5.20822e-12
map-data-2021.01.25-17.48.04.912_1859.jpk-force	1859	2.22656e-06	-1.95312e-07	-7.28182e-09	1.06816e-05	1.98534e-11	-4.05768e-05	-6.19974e-12	-1.38994e-07	3.28604e-12	-1.40995e-07	-2.97704e-12	2.7539e-12
map-data-2021.01.25-17.48.04.912_1860.jpk-force	1860	2.14844e-06	-1.95312e-07	-7.22992e-09	9.75191e-06	1.43739e-11	-4.7282e-05	-1.50908e-11	-1.38967e-07	5.56279e-12	-1.34298e-07	-3.36976e-12	6.43194e-12
map-data-2021.01.25-17.48.04.912_1861.jpk-force	1861	2.07031e-06	-1.95312e-07	-7.2537e-09	9.94567e-06	1.33635e-11	-5.22239e-05	-5.30493e-11	-2.54739e-06	2.12206e-11	-2.48798e-06	-1.0258e-11	1.58351e-11
map-data-2021.01.25-17.48.04.912_1862.jpk-force	1862	1.99219e-06	-1.95312e-07	-7.27698e-09	9.88294e-06	-2.19761e-11	-5.4535e-05	-1.82605e-11	-2.47764e-06	2.65747e-11	-2.51135e-06	2.39174e-12	9.91386e-12
map-data-2021.01.25-17.48.04.912_1863.jpk-force	1863	1.91406e-06	-1.95312e-07	-7.34226e-09	9.85275e-06	-2.69113e-11	-8.13347e-05	-1.98239e-11	-1.93357e-06	1.83765e-11	-1.91522e-06	-1.85786e-13	7.21107e-12
map-data-2021.01.25-17.48.04.912_1864.jpk-force	1864	1.83594e-06	-1.95312e-07	-7.30899e-09	1.0007e-05	3.94099e-11	-3.49358e-05	-1.56594e-11	-1.87428e-06	1.82569e-11	-1.90365e-06	-4.8371e-13	7.3899e-12
map-data-2021.01.25-17.48.04.912_1865.jpk-force	1865	1.75781e-06	-1.95312e-07	-7.27016e-09	9.9215e-06	1.90059e-11	-4.49271e-05	-1.87591e-11	-1.41599e-06	1.41459e-11	-1.422e-06	-1.0816e-12	1.03593e-11
map-data-2021.01.25-17.48.04.912_1866.jpk-force	1866	1.67969e-06	-1.95312e-07	-7.28103e-09	9.90535e-06	4.01669e-13	-5.97099e-05	-9.51879e-12	-1.41417e-06	1.74556e-11	-1.41918e-06	4.6011e-12	8.92229e-12
map-data-2021.01.25-17.48.04.912_1867.jpk-force	1867	1.60156e-06	-1.95312e-07	-7.30528e-09	9.97174e-06	2.36135e-11	-4.78579e-05	-8.86832e-12	-1.41305e-06	7.90707e-12	-1.42139e-06	-1.32936e-12	5.17871e-12
map-data-2021.01.25-17.48.04.912_1868.jpk-force	1868	1.52344e-06	-1.95312e-07	-7.30315e-09	1.0064e-05	1.82851e-11	-3.64066e-05	-1.13559e-11	-1.41037e-06	1.6282e-11	-1.41971e-06	3.24897e-12	7.77156e-12
map-data-2021.01.25-17.48.04.912_1869.jpk-force	1869	1.44531e-06	-1.95312e-07	-7.28729e-09	1.00665e-05	1.40968e-11	-5.09911e-05	-5.55148e-11	-2.27216e-06	2.4788e-11	-2.19107e-06	-1.32859e-11	1.76746e-11
map-data-2021.01.25-17.48.04.912_1870.jpk-force	1870	1.36719e-06	-1.95312e-07	-7.31161e-09	1.00323e-05	-2.56259e-13	-5.67734e-05	-4.82945e-11	-2.14245e-06	8.92744e-12	-2.13744e-06	-1.91765e-11	9.93166e-12
map-data-2021.01.25-17.48.04.912_1871.jpk-force	1871	1.28906e-06	-1.95312e-07	-7.30194e-09	1.02691e-05	1.2029e-11	-4.76693e-05	-2.09392e-11	-2.24342e-06	1.94702e-11	-2.23808e-06	-2.16047e-13	7.26666e-12
map-data-2021.01.25-17.48.04.912_1872.jpk-force	1872	1.21094e-06	-1.95312e-07	-7.29784e-09	9.63168e-06	2.21736e-11	-5.453e-05	-1.3532e-11	-1.66231e-06	1.8776e-11	-1.64196e-06	4.0036e-12	8.53094e-12
map-data-2021.01.25-17.48.04.912_1873.jpk-force	1873	1.13281e-06	-1.95312e-07	-7.30966e-09	1.03268e-05	9.14234e-12	-4.88126e-05	-1.49475e-11	-1.66276e-06	1.14794e-11	-1.64174e-06	-5.09204e-12	6.20561e-12
map-data-2021.01.25-17.48.04.912_1874.jpk-force	1874	1.05469e-06	-1.95312e-07	-7.32296e-09	1.02889e-05	-1.0927e-12	-6.30352e-05	-9.21699e-12	-1.64622e-06	1.84592e-11	-1.64189e-06	4.61534e-13	6.04475e-12
map-data-2021.01.25-17.48.04.912_1875.jpk-force	1875	9.76563e-07	-1.95312e-07	-7.30765e-09	9.65011e-06	9.23403e-12	-6.29252e-05	-5.15703e-11	-1.61484e-06	2.95656e-11	-1.55311e-06	-1.10677e-11	1.78908e-11
map-data-2021.01.25-17.48.04.912_1876.jpk-force	1876	8.98437e-07	-1.95312e-07	-7.29774e-09	9.93985e-06	1.3275e-11	-5.41612e-05	-7.22561e-12	-1.04713e-06	6.44721e-13	-1.0498e-06	-4.12495e-12	2.24446e-12
map-data-2021.01.25-17.48.04.912_1877.jpk-force	1877	8.20312e-07	-1.95312e-07	-7.30082e-09	1.01495e-05	2.98952e-11	-5.1355e-05	-1.36967e-11	-1.04855e-06	8.0753e-12	-1.04488e-06	-4.63229e-12	8.09439e-12
map-data-2021.01.25-17.48.04.912_1878.jpk-force	1878	7.42187e-07	-1.95312e-07	-7.29075e-09	1.00911e-05	8.27549e-12	-5.01968e-05	-9.12379e-12	-1.05124e-06	3.36552e-12	-1.04657e-06	-1.06465e-12	2.95849e-12
map-data-2021.01.25-17.48.04.912_1879.jpk-force	1879	6.64062e-07	-1.95312e-07	-7.27468e-09	1.01104e-05	2.40391e-11	-4.72743e-05	-1.82263e-11	-1.04938e-06	1.10036e-12	-1.04471e-06	-1.01586e-11	5.48894e-12
map-data-2021.01.25-17.48.04.912_1880.jpk-force	1880	5.85938e-07	-1.95312e-07	-7.28071e-09	9.90379e-06	4.10563e-11	-3.70866e-05	-7.83829e-13	-1.04927e-06	1.722e-11	-1.04493e-06	4.94472e-12	6.16919e-12
map-data-2021.01.25-17.48.04.912_1881.jpk-force	1881	5.07813e-07	-1.95312e-07	-7.28019e-09	1.02765e-05	5.24848e-12	-6.84149e-05	-1.5417e-11	-1.0483e-06	-4.64822e-12	-1.04463e-06	-1.13034e-11	2.74184e-12
map-data-2021.01.25-17.48.04.912_1882.jpk-force	1882	4.29687e-07	-1.95312e-07	-7.29494e-09	1.0211e-05	1.08668e-11	-5.5898e-05	-1.14488e-11	-1.05021e-06	9.29029e-12	-1.04454e-06	-2.74521e-12	5.94679e-12
map-data-2021.01.25-17.48.04.912_1883.jpk-force	1883	3.51563e-07	-1.95312e-07	-7.27923e-09	8.38228e-06	1.75875e-11	-7.32929e-05	-5.73726e-11	-7.39693e-07	1.29773e-11	-6.90637e-07	-1.88962e-11	1.84137e-11
map-data-2021.01.25-17.48.04.912_1884.jpk-force	1884	2.73438e-07	-1.95312e-07	-7.31232e-09	1.00625e-05	-4.18864e-11	-8.12109e-05	-2.09901e-11	-1.8307e-06	2.19767e-11	-1.82503e-06	-1.88443e-12	1.05286e-11
map-data-2021.01.25-17.48.04.912_1885.jpk-force	1885	1.95312e-07	-1.95312e-07	-7.28517e-09	9.88501e-06	-1.29587e-11	-5.76825e-05	-1.44252e-11	-1.81997e-06	2.48084e-11	-1.84967e-06	2.99664e-12	8.94417e-12
map-data-2021.01.25-17.48.04.912_1886.jpk-force	1886	1.17187e-07	-1.95312e-07	-7.28163e-09	1.00965e-05	8.99312e-11	-1.21667e-05	-1.41315e-11	-1.84088e-06	1.60052e-11	-1.83654e-06	-2.04508e-12	8.36919e-12
map-data-2021.01.25-17.48.04.912_1887.jpk-force	1887	3.90618e-08	-1.95312e-07	-7.25146e-09	1.00243e-05	-1.34735e-11	-6.48986e-05	-1.33475e-11	-1.83144e-06	2.17468e-11	-1.83744e-06	2.79027e-12	9.74157e-12
map-data-2021.01.25-17.48.04.912_1888.jpk-force	1888	-3.90623e-08	-1.95312e-07	-7.24267e-09	1.01935e-05	6.8607e-12	-5.17118e-05	-8.39039e-12	-1.82119e-06	1.1891e-11	-1.82452e-06	1.95465e-12	4.33344e-12
map-data-2021.01.25-17.48.04.912_1889.jpk-force	1889	-1.17187e-07	-1.95312e-07	-7.24759e-09	1.02747e-05	6.55892e-12	-5.24685e-05	-1.19873e-11	-1.84458e-06	1.10695e-11	-1.83691e-06	-2.05009e-12	5.84924e-12
map-data-2021.01.25-17.48.04.912_1890.jpk-force	1890	-1.95313e-07	-1.95312e-07	-7.23245e-09	9.97585e-06	1.17995e-11	-4.96245e-05	-1.79375e-11	-5.95735e-07	1.56825e-11	-6.3075e-07	-2.96276e-12	7.3432e-12
map-data-2021.01.25-17.48.04.912_1891.jpk-force	1891	-2.73438e-07	-1.95312e-07	-7.25409e-09	1.00454e-05	-1.24918e-11	-6.20057e-05	-1.69071e-11	-2.06278e-06	1.48605e-11	-2.11049e-06	-8.50242e-13	7.29104e-12
map-data-2021.01.25-17.48.04.912_1892.jpk-force	1892	-3.51563e-07	-1.95312e-07	-7.26396e-09	1.03347e-05	-3.74207e-12	-6.20729e-05	-1.9878e-11	-1.91015e-06	1.77776e-11	-1.92684e-06	-8.41164e-13	8.94002e-12
map-data-2021.01.25-17.48.04.912_1893.jpk-force	1893	-4.29688e-07	-1.95312e-07	-7.23385e-09	9.7184e-06	-4.27722e-11	-7.94404e-05	-1.01087e-11	-1.89793e-06	1.57026e-11	-1.90727e-06	2.05594e-12	6.65585e-12
map-data-2021.01.25-17.48.04.912_1894.jpk-force	1894	-5.07813e-07	-1.95312e-07	-7.3301e-09	1.02422e-05	2.70808e-11	-6.47362e-05	-9.4639e-12	-1.92634e-06	9.55226e-12	-1.917e-06	9.44392e-13	4.82311e-12
map-data-2021.01.25-17.48.04.912_1895.jpk-force	1895	-5.85938e-07	-1.95312e-07	-7.25627e-09	1.00428e-05	-7.9128e-12	-6.16392e-05	-1.67278e-11	-1.89774e-06	1.43616e-11	-1.92677e-06	4.25048e-14	7.95785e-12
map-data-2021.01.25-17.48.04.912_1896.jpk-force	1896	-6.64063e-07	-1.95312e-07	-7.29753e-09	9.69008e-06	6.19533e-11	-2.65093e-05	-5.79321e-11	-4.25264e-07	1.44266e-11	-3.95585e-07	-2.15563e-11	2.09916e-11
map-data-2021.01.25-17.48.04.912_1897.jpk-force	1897	-7.42187e-07	-1.95312e-07	-7.27532e-09	1.01604e-05	1.36149e-11	-5.39553e-05	-1.75462e-11	-1.30023e-06	1.7968e-11	-1.29223e-06	-1.08472e-13	7.25974e-12
map-data-2021.01.25-17.48.04.912_1898.jpk-force	1898	-8.20313e-07	-1.95312e-07	-7.27926e-09	9.37187e-06	5.09185e-11	-4.87585e-05	-5.79258e-11	4.90908e-08	1.21061e-11	1.33462e-07	-2.60287e-11	2.16281e-11
map-data-2021.01.25-17.48.04.912_1899.jpk-force	1899	-8.98437e-07	-1.95312e-07	-7.2676e-09	1.00331e-05	1.80069e-11	-4.10528e-05	-1.38819e-11	-2.57395e-07	1.48976e-11	-2.77405e-07	1.6961e-12	7.6467e-12
map-data-2021.01.25-17.48.04.912_1900.jpk-force	1900	-9.76563e-07	-1.95312e-07	-7.23708e-09	1.00194e-05	1.46767e-11	-4.90986e-05	-1.59701e-11	-2.70782e-07	1.82595e-11	-2.76118e-07	1.99085e-12	8.46685e-12
map-data-2021.01.25-17.48.04.912_1901.jpk-force	1901	-1.05469e-06	-1.95312e-07	-7.29933e-09	1.02078e-05	1.6618e-11	-5.29638e-05	-1.85268e-11	-2.8486e-07	9.13232e-12	-2.76189e-07	-2.9604e-12	6.31154e-12
map-data-2021.01.25-17.48.04.912_1902.jpk-force	1902	-1.13281e-06	-1.95312e-07	-7.25693e-09	8.67365e-06	3.15019e-11	-4.87422e-05	-8.61788e-12	-6.36104e-07	1.57518e-11	-6.40442e-07	2.33412e-12	6.91532e-12
map-data-2021.01.25-17.48.04.912_1903.jpk-force	1903	-1.21094e-06	-1.95312e-07	-7.34234e-09	1.03817e-05	3.01638e-11	-5.938e-05	-1.95906e-11	-8.31216e-07	9.38965e-12	-8.36551e-07	-4.99497e-12	7.59799e-12
map-data-2021.01.25-17.48.04.912_1904.jpk-force	1904	-1.28906e-06	-1.95312e-07	-7.3645e-09	9.93133e-06	1.04121e-11	-5.53138e-05	-7.90845e-12	-1.47757e-06	-1.70818e-13	-1.47424e-06	-4.90136e-12	2.48974e-12
map-data-2021.01.25-17.48.04.912_1905.jpk-force	1905	-1.36719e-06	-1.95312e-07	-7.30669e-09	1.1223e-05	7.1433e-12	-4.48605e-05	-7.13728e-12	-1.47923e-06	1.74489e-11	-1.47489e-06	5.29476e-12	8.39166e-12
map-data-2021.01.25-17.48.04.912_1906.jpk-force	1906	-1.44531e-06	-1.95312e-07	-7.26404e-09	1.00361e-05	-6.52214e-12	-5.50199e-05	-4.13885e-12	-1.47798e-06	9.26344e-12	-1.47398e-06	3.60816e-12	4.20803e-12
map-data-2021.01.25-17.48.04.912_1907.jpk-force	1907	-1.52344e-06	-1.95312e-07	-7.30035e-09	9.77247e-06	4.20201e-12	-6.25012e-05	-6.90508e-11	-2.2453e-06	1.90579e-11	-2.20124e-06	-3.43828e-11	2.39886e-11
map-data-2021.01.25-17.48.04.912_1908.jpk-force	1908	-1.60156e-06	-1.95312e-07	-7.40941e-09	1.01419e-05	1.55301e-11	-5.78178e-05	-6.03056e-11	-1.1372e-06	1.86039e-11	-1.11019e-06	-2.53939e-11	1.83696e-11
map-data-2021.01.25-17.48.04.912_1909.jpk-force	1909	-1.67969e-06	-1.95312e-07	-7.40477e-09	1.23942e-05	1.50926e-11	-4.76042e-05	-1.02964e-11	-1.21732e-06	2.81665e-11	-1.21198e-06	6.15231e-12	7.90312e-12
map-data-2021.01.25-17.48.04.912_1910.jpk-force	1910	-1.75781e-06	-1.95312e-07	-7.30603e-09	1.04579e-05	1.30244e-11	-6.06121e-05	-1.73912e-11	-1.02401e-06	1.78166e-11	-1.01901e-06	-5.7834e-14	7.73088e-12
map-data-2021.01.25-17.48.04.912_1911.jpk-force	1911	-1.83594e-06	-1.95312e-07	-7.34703e-09	1.04581e-05	1.31459e-11	-5.60844e-05	-7.36694e-12	-1.02543e-06	2.55176e-11	-1.04144e-06	9.69224e-12	7.29296e-12
map-data-2021.01.25-17.48.04.912_1912.jpk-force	1912	-1.91406e-06	-1.95312e-07	-7.28617e-09	1.00729e-05	1.1625e-11	-4.82649e-05	-1.46412e-11	-1.06392e-06	1.45002e-11	-1.10694e-06	-2.4121e-12	6.5816e-12
map-data-2021.01.25-17.48.04.912_1913.jpk-force	1913	-1.99219e-06	-1.95312e-07	-7.28994e-09	1.0101e-05	1.56945e-11	-4.59249e-05	-1.53513e-11	-1.06657e-06	1.79882e-11	-1.09925e-06	3.86551e-13	8.01048e-12
map-data-2021.01.25-17.48.04.912_1914.jpk-force	1914	-2.07031e-06	-1.95312e-07	-7.35666e-09	1.0375e-05	8.26245e-12	-7.91927e-05	-6.42785e-13	-1.11576e-06	3.18356e-11	-1.09542e-06	1.42567e-11	6.86498e-12
map-data-2021.01.25-17.48.04.912_1915.jpk-force	1915	-2.14844e-06	-1.95312e-07	-7.27408e-09	9.87977e-06	1.24731e-11	-4.73614e-05	-1.66589e-11	-1.11644e-06	1.9689e-11	-1.11044e-06	9.19736e-15	8.18267e-12
map-data-2021.01.25-17.48.04.912_1916.jpk-force	1916	-2.22656e-06	-1.95312e-07	-7.25618e-09	9.98711e-06	1.60703e-11	-5.22128e-05	-7.94427e-12	-9.54174e-07	7.93796e-12	-9.56841e-07	-2.38916e-12	4.47955e-12
map-data-2021.01.25-17.48.04.912_1917.jpk-force	1917	-2.30469e-06	-1.95312e-07	-7.31306e-09	1.03123e-05	1.39915e-11	-5.93905e-05	-1.46958e-12	-9.56665e-07	1.3388e-11	-9.51996e-07	7.88528e-12	4.14785e-12
map-data-2021.01.25-17.48.04.912_1918.jpk-force	1918	-2.38281e-06	-1.95312e-07	-7.33078e-09	1.01185e-05	2.71331e-11	-5.91044e-05	-5.18918e-11	-2.06698e-06	1.19209e-11	-1.99358e-06	-2.19285e-11	1.6526e-11
map-data-2021.01.25-17.48.04.912_1919.jpk-force	1919	-2.46094e-06	-1.95312e-07	-7.29811e-09	9.94469e-06	4.91978e-11	-3.40089e-05	-8.92007e-12	-1.30964e-06	1.95308e-11	-1.32998e-06	4.64113e-12	7.76758e-12
map-data-2021.01.25-17.48.04.912_1920.jpk-force	1920	-2.46094e-06	-1.17188e-07	-7.32037e-09	1.0251e-05	6.11806e-11	-4.90492e-05	-1.1695e-11	-1.67676e-06	2.1327e-11	-1.70712e-06	5.10561e-12	7.70691e-12
map-data-2021.01.25-17.48.04.912_1921.jpk-force	1921	-2.38281e-06	-1.17188e-07	-7.32772e-09	1.13007e-05	5.80555e-12	-6.01542e-05	-1.8301e-11	-1.65008e-06	1.95907e-11	-1.69077e-06	-1.61516e-12	7.01905e-12
map-data-2021.01.25-17.48.04.912_1922.jpk-force	1922	-2.30469e-06	-1.17188e-07	-7.25318e-09	9.78516e-06	1.87249e-11	-4.42074e-05	-1.29248e-11	-1.71657e-06	2.4236e-11	-1.65552e-06	1.59898e-12	7.71157e-12
map-data-2021.01.25-17.48.04.912_1923.jpk-force	1923	-2.22656e-06	-1.17188e-07	-7.2085e-09	9.71895e-06	-1.70772e-12	-3.77872e-05	-1.78313e-11	-1.71546e-06	2.02227e-11	-1.69611e-06	-5.04283e-13	9.34106e-12
map-data-2021.01.25-17.48.04.912_1924.jpk-force	1924	-2.14844e-06	-1.17188e-07	-7.21901e-09	1.01494e-05	1.33599e-11	-5.7934e-05	-1.74171e-11	-1.20587e-06	1.72481e-11	-1.20087e-06	-1.03849e-12	1.03306e-11
map-data-2021.01.25-17.48.04.912_1925.jpk-force	1925	-2.07031e-06	-1.17188e-07	-7.26774e-09	1.03423e-05	4.2868e-11	-3.33447e-05	-1.32892e-11	-1.20419e-06	8.37811e-12	-1.19952e-06	-4.0418e-12	6.16811e-12
map-data-2021.01.25-17.48.04.912_1926.jpk-force	1926	-1.99219e-06	-1.17188e-07	-7.23906e-09	9.89434e-06	2.50482e-11	-4.88863e-05	-1.20946e-11	-1.20512e-06	2.08737e-11	-1.20945e-06	4.89087e-12	8.86524e-12
map-data-2021.01.25-17.48.04.912_1927.jpk-force	1927	-1.91406e-06	-1.17188e-07	-7.24987e-09	9.92041e-06	3.90223e-12	-5.8445e-05	-6.99563e-12	-1.2065e-06	1.79859e-12	-1.19683e-06	-2.59924e-12	2.2685e-12
map-data-2021.01.25-17.48.04.912_1928.jpk-force	1928	-1.83594e-06	-1.17188e-07	-7.2658e-09	1.00497e-05	1.18952e-11	-5.2598e-05	-1.89035e-11	-1.19667e-06	1.9268e-11	-1.193e-06	1.00046e-12	1.15769e-11
map-data-2021.01.25-17.48.04.912_1929.jpk-force	1929	-1.75781e-06	-1.17188e-07	-7.27174e-09	1.02163e-05	6.21014e-12	-4.95746e-05	-6.52009e-12	-1.20835e-06	1.1381e-11	-1.20468e-06	1.46617e-12	5.03644e-12
map-data-2021.01.25-17.48.04.912_1930.jpk-force	1930	-1.67969e-06	-1.17188e-07	-7.24979e-09	1.00862e-05	1.1334e-11	-4.52518e-05	-8.47263e-12	-1.2095e-06	8.81842e-12	-1.19716e-06	-1.60809e-12	4.81283e-12
map-data-2021.01.25-17.48.04.912_1931.jpk-force	1931	-1.60156e-06	-1.17188e-07	-7.2671e-09	1.01838e-05	6.35535e-12	-6.04522e-05	-1.42019e-11	-1.19664e-06	1.71e-11	-1.20098e-06	-1.01151e-12	8.36701e-12
map-data-2021.01.25-17.48.04.912_1932.jpk-force	1932	-1.52344e-06	-1.17188e-07	-7.29023e-09	9.9293e-06	1.21092e-11	-5.09815e-05	-1.28003e-11	-1.20793e-06	1.21309e-11	-1.1996e-06	-2.58903e-12	7.65521e-12
map-data-2021.01.25-17.48.04.912_1933.jpk-force	1933	-1.44531e-06	-1.17188e-07	-7.28253e-09	9.68454e-06	2.01156e-11	-6.02121e-05	-1.08258e-11	-1.20763e-06	1.18569e-11	-1.19929e-06	-2.69078e-13	7.45683e-12
map-data-2021.01.25-17.48.04.912_1934.jpk-force	1934	-1.36719e-06	-1.17188e-07	-7.32351e-09	1.02701e-05	4.45655e-11	-4.82078e-05	-7.68461e-12	-1.20934e-06	1.35691e-11	-1.202e-06	-1.50661e-13	7.05969e-12
map-data-2021.01.25-17.48.04.912_1935.jpk-force	1935	-1.28906e-06	-1.17188e-07	-7.31884e-09	1.03304e-05	8.82541e-12	-6.57335e-05	-1.19933e-11	-1.19306e-06	1.3758e-11	-1.20106e-06	9.15679e-13	7.5805e-12
map-data-2021.01.25-17.48.04.912_1936.jpk-force	1936	-1.21094e-06	-1.17188e-07	-7.26861e-09	1.0108e-05	1.50041e-11	-5.03128e-05	-1.97477e-11	-1.19425e-06	8.27342e-12	-1.20025e-06	-6.54342e-12	9.1799e-12
map-data-2021.01.25-17.48.04.912_1937.jpk-force	1937	-1.13281e-06	-1.17188e-07	-7.28412e-09	9.94473e-06	1.75081e-11	-4.47915e-05	-1.4058e-11	-1.20657e-06	1.67913e-11	-1.2009e-06	-1.04207e-12	8.38182e-12
map-data-2021.01.25-17.48.04.912_1938.jpk-force	1938	-1.05469e-06	-1.17188e-07	-7.28004e-09	1.03492e-05	6.69413e-12	-4.77946e-05	-2.99835e-11	-1.27415e-06	1.65767e-11	-1.37152e-06	-6.12275e-12	9.4401e-12
map-data-2021.01.25-17.48.04.912_1939.jpk-force	1939	-9.76563e-07	-1.17188e-07	-7.30615e-09	1.09397e-05	1.71622e-11	-4.63624e-05	-1.77679e-11	-1.25038e-06	1.89508e-11	-1.36912e-06	-2.75572e-13	7.98345e-12
map-data-2021.01.25-17.48.04.912_1940.jpk-force	1940	-8.98437e-07	-1.17188e-07	-7.27138e-09	1.0195e-05	1.24448e-11	-6.23556e-05	-1.7606e-11	-1.31084e-06	1.9707e-11	-1.39688e-06	1.33603e-14	8.61685e-12
map-data-2021.01.25-17.48.04.912_1941.jpk-force	1941	-8.20313e-07	-1.17188e-07	-7.28581e-09	1.03246e-05	1.48913e-11	-6.9965e-05	-5.04138e-11	-1.22416e-06	9.07891e-12	-1.19814e-06	-1.6219e-11	1.71825e-11
map-data-2021.01.25-17.48.04.912_1942.jpk-force	1942	-7.42187e-07	-1.17188e-07	-7.25821e-09	1.01304e-05	-5.79685e-13	-5.77864e-05	-1.60402e-11	-1.22242e-06	2.85773e-12	-1.21842e-06	-4.61519e-12	3.94022e-12
map-data-2021.01.25-17.48.04.912_1943.jpk-force	1943	-6.64063e-07	-1.17188e-07	-7.2919e-09	9.63914e-06	2.02981e-11	-8.10491e-05	-1.18445e-11	-1.19146e-06	2.19236e-11	-1.20314e-06	7.02378e-12	9.84688e-12
map-data-2021.01.25-17.48.04.912_1944.jpk-force	1944	-5.85938e-07	-1.17188e-07	-7.28115e-09	1.02888e-05	1.24084e-11	-4.7927e-05	-1.48039e-11	-1.19442e-06	1.22949e-11	-1.2131e-06	-2.33932e-12	7.17493e-12
map-data-2021.01.25-17.48.04.912_1945.jpk-force	1945	-5.07813e-07	-1.17188e-07	-7.27626e-09	1.03404e-05	-1.56105e-12	-5.43642e-05	-1.65609e-11	-1.20547e-06	1.78065e-11	-1.22315e-06	9.62298e-14	1.02986e-11
map-data-2021.01.25-17.48.04.912_1946.jpk-force	1946	-4.29688e-07	-1.17188e-07	-7.31356e-09	1.08646e-05	3.58167e-11	-4.99768e-05	-1.08725e-11	-1.20646e-06	1.4831e-11	-1.20146e-06	2.04326e-12	7.24386e-12
map-data-2021.01.25-17.48.04.912_1947.jpk-force	1947	-3.51563e-07	-1.17188e-07	-7.28841e-09	1.09545e-05	1.08155e-11	-4.86438e-05	-1.66194e-11	-1.20445e-06	1.76385e-11	-1.19978e-06	-5.13531e-14	7.64657e-12
map-data-2021.01.25-17.48.04.912_1948.jpk-force	1948	-2.73438e-07	-1.17188e-07	-7.31162e-09	1.03425e-05	3.43674e-11	-4.22009e-05	-1.09543e-11	-1.19383e-06	2.78827e-11	-1.20116e-06	1.19128e-11	8.43141e-12
map-data-2021.01.25-17.48.04.912_1949.jpk-force	1949	-1.95313e-07	-1.17188e-07	-7.31965e-09	1.04991e-05	2.57124e-11	-3.57471e-05	-1.34273e-11	-1.20852e-06	2.7512e-11	-1.20318e-06	5.46219e-12	9.25377e-12
map-data-2021.01.25-17.48.04.912_1950.jpk-force	1950	-1.17188e-07	-1.17188e-07	-7.26752e-09	1.06257e-05	9.26794e-12	-5.71867e-05	-4.2543e-11	-9.9859e-07	1.6657e-11	-9.27894e-07	-1.47221e-11	1.14e-11
map-data-2021.01.25-17.48.04.912_1951.jpk-force	1951	-3.90635e-08	-1.17188e-07	-7.26686e-09	1.06803e-05	1.30459e-11	-3.95364e-05	-4.33273e-12	-1.21023e-06	1.9948e-11	-1.20056e-06	6.27025e-12	6.44785e-12
map-data-2021.01.25-17.48.04.912_1952.jpk-force	1952	3.90618e-08	-1.17188e-07	-7.25884e-09	1.02187e-05	2.20133e-11	-3.74695e-05	-1.0814e-11	-1.21332e-06	1.77745e-11	-1.21766e-06	3.12546e-12	6.33314e-12
map-data-2021.01.25-17.48.04.912_1953.jpk-force	1953	1.17188e-07	-1.17188e-07	-7.26321e-09	1.09933e-05	1.63073e-11	-4.3559e-05	-9.90268e-12	-7.79745e-07	2.1229e-12	-7.90083e-07	-2.95939e-12	2.73455e-12
[truncated: 2,142 more rows]

## Sheet: Figure3-figure supplement 4
Force-Loading Rate(LR)
[truncated: 1,026 more rows]
[truncated: 6 more columns]
