# Supplementary material for: N501Y mutation of spike protein in SARS-CoV-2 strengthens its binding to receptor ACE2
Source: eLife. 2021 Aug 20;10:e69091. doi: 10.7554/eLife.69091 (PMC8455130; doi:10.7554/eLife.69091)
Supplement: Figure 3—source data 4. [file elife-69091-fig3-data4.xlsx]

## Sheet: Figure 3F
Force-Loading Rate(LR)
RBD-Force	RBD-LR	RBDN501Y -Force	RBDN501Y-LR	RBDTriple-Force	RBDTriple-LR
19.072	22.2964	22.4821	16.7716	15.9294	17.8865
21.3309	24.4351	28.3493	31.7765	23.7378	18.6767
22.4963	25.8066	40.2441	32.7216	22.4432	21.6916
17.2605	25.9645	25.8488	44.6896	20.1657	23.0989
23.9618	26.0699	33.7853	44.9259	21.8253	24.3985
20.2344	26.1416	23.0314	45.9484	20.9165	25.2735
23.2145	27.4763	27.9946	47.2695	27.4925	28.6052
25.2528	27.8132	25.8299	49.063	24.4818	28.8242
28.1277	29.1308	35.2347	49.2144	22.028	29.9876
21.6822	29.1363	26.8393	49.4679	24.3453	32.5894
21.0223	33.104	25.3141	49.9705	21.5994	33.9143
27.3338	33.1469	27.1666	50.5678	27.1751	34.837
23.2592	33.5712	35.2043	50.9469	21.1288	35.2956
17.7484	34.9893	33.1145	51.1238	21.9176	36.3157
29.1497	35.4676	20.9711	51.2084	22.8309	36.6278
30.1557	35.6439	32.464	52.5526	24.6588	36.8753
30.5159	36.2952	29.6785	53.448	31.635	37.0704
24.1675	37.6602	27.2	55.4931	19.3314	37.9357
26.8545	37.7954	32.9975	55.7275	24.54	38.0162
28.9435	37.9446	23.9427	56.1984	22.4531	38.4673
26.705	38.2984	34.7786	56.8035	22.2741	38.566
23.5036	38.662	32.1068	56.8608	25.2637	38.6925
26.8112	39.9773	62.2835	58.0441	22.8844	39.0123
24.3922	40.9766	41.5144	58.3022	29.6412	39.5906
21.0092	41.1244	20.8158	59.1515	18.6962	40.1204
25.5511	42.4426	24.5763	59.2682	21.0226	40.1824
23.1181	42.9319	26.2776	59.9495	21.8521	40.3011
39.0573	43.2872	35.8418	60.1672	26.9364	40.5994
19.2191	43.7533	29.5341	60.4704	19.094	41.7746
17.8637	44.425	25.0675	61.0576	22.1213	42.4235
28.4941	44.4524	29.79	61.5296	23.4564	42.6223
23.6394	45.423	31.5087	61.9462	32.1509	43.2284
26.6973	45.5184	24.6281	63.3682	23.6769	43.9165
26.3766	46.787	37.0813	63.8767	26.8051	44.1691
26.0613	46.8454	27.8528	63.889	21.6378	44.7534
29.2747	46.9802	34.3149	63.9165	22.6801	44.8226
23.6084	47.011	23.1928	64.1648	25.1994	45.1263
26.1899	47.0958	37.8655	64.3761	20.6368	45.187
22.0553	47.6152	42.0475	64.3941	20.9419	45.2902
18.8474	47.6581	25.3146	64.7102	25.4062	45.7451
26.0411	47.6863	46.5928	64.807	25.4122	46.0316
33.8146	48.3998	27.3998	65.0945	16.0495	46.0514
21.2055	48.6863	24.3135	66.4926	17.4692	46.32
25.7198	49.3652	30.3859	66.9605	17.371	46.3939
25.0583	49.4573	27.1491	67.4873	14.7463	46.7449
33.3504	49.6181	32.5044	68.3588	34.4513	47.2324
24.0288	50.4282	26.8571	68.779	31.7582	47.5377
28.8126	50.4683	32.365	69.3664	28.9783	47.7297
25.1716	50.4815	31.866	69.4478	21.7442	47.777
15.0584	50.545	25.7168	71.7652	27.3947	47.9572
25.0402	50.6241	23.976	72.4241	33.3717	49.0267
25.5946	51.0383	37.691	72.7942	26.4621	49.0714
23.9771	51.6731	24.898	73.2103	24.4458	49.8043
21.0089	52.1488	38.5508	73.2546	23.2307	49.9749
30.7378	52.5173	26.1608	75.1884	29.3013	50.1231
21.5992	53.3748	30.3836	75.4929	23.7186	50.1464
18.3019	53.4424	33.4859	75.5962	28.2818	50.7355
24.8643	53.4526	42.0907	77.0882	22.3759	50.8383
30.0261	53.5456	23.732	77.2365	24.0042	50.9731
30.3795	53.6695	28.5011	77.6541	19.4028	51.0079
27.3346	54.5881	25.4027	78.4865	24.2359	51.8822
20.9528	54.7334	29.1311	79.1459	27.3383	52.1178
38.4756	54.8742	43.0447	79.2714	27.2496	52.3795
31.0382	54.9045	33.5891	79.3926	29.1678	52.847
21.1713	55.7274	32.1561	79.9091	24.1934	52.9607
28.1032	56.3303	26.0323	80.1792	21.8223	53.0249
27.5028	56.796	45.4239	80.6084	17.8941	53.3162
23.8744	56.8841	35.6249	81.3639	30.0744	53.6734
25.7907	57.0071	22.7334	81.6311	26.3326	53.9096
26.5109	57.6734	44.0751	81.7675	30.8188	54.0569
24.6392	57.7181	23.6219	82.4373	23.2574	54.6614
27.1092	58.3567	32.5722	82.9508	22.6688	54.7948
25.2717	58.4359	33.1776	83.4061	20.8758	55.0194
20.1962	58.5205	37.3419	85.1342	26.5281	55.8608
29.6356	58.7363	30.7245	85.2441	20.6495	55.894
37.779	58.7576	26.3515	87.17	27.722	56.0148
21.06	59.1386	32.7025	87.2055	41.6692	56.0233
27.1832	59.3465	34.4327	87.5874	24.0109	56.4217
31.0337	59.4509	36.1882	88.0052	18.4382	56.6196
22.0059	59.52	24.6835	88.1084	18.9754	57.5088
26.0727	59.8364	24.9831	88.2634	24.8949	58.0953
24.9843	59.8738	34.0702	88.979	22.0079	58.3521
28.9912	59.8875	27.505	90.0958	23.0857	59.347
26.9797	60.0072	23.8215	90.9314	30.4974	59.4374
29.6675	60.2916	19.1193	91.0695	35.5405	60.2543
18.6028	60.6371	39.088	91.1091	27.9122	60.3269
23.1315	60.707	36.2093	91.1661	17.7496	60.8099
30.5696	60.799	38.0959	91.2418	19.0226	61.0844
21.4844	60.9646	27.6948	92.204	32.9299	61.4578
25.899	61.1974	26.9789	92.3044	24.6209	61.6185
22.5979	61.2372	33.0268	92.4382	24.8494	61.7971
24.3861	61.3928	24.8326	92.7415	23.7377	61.8046
20.1817	61.7267	19.0951	93.0103	26.989	61.9622
29.0653	61.9499	33.4291	93.506	21.3197	62.086
19.9827	61.9956	24.5408	93.5447	25.7568	62.3345
19.2078	62.1778	29.8756	93.6345	28.258	63.305
18.5055	62.809	29.3859	93.8701	26.0945	63.3478
24.886	62.9989	35.521	93.982	25.5244	63.7958
21.3655	63.0701	34.5524	94.1553	21.2027	63.828
27.3237	63.5723	17.0642	95.4378	19.3283	64.3027
27.5526	63.7645	31.3241	95.5835	27.4326	64.3104
25.0534	63.8801	24.5769	96.1485	32.6986	64.6285
18.1498	64.1855	45.0578	96.9034	18.478	64.6633
23.6039	64.8492	40.214	97.5822	28.5733	64.7194
23.922	65.0144	34.72	97.6218	23.7351	64.8567
20.8344	65.0462	35.0806	97.6285	24.8221	65.143
27.5795	65.665	36.7342	97.6637	33.7996	65.1575
25.7144	65.7961	28.296	97.6886	16.9134	65.8154
22.1029	65.8212	39.8202	97.8165	23.4571	65.9592
27.176	66.116	38.0188	97.8907	26.2243	66.1008
22.5769	66.3608	21.277	98.0576	19.2457	66.1625
22.597	66.4557	26.1322	98.3935	29.7485	66.6841
23.2908	66.6273	21.6096	98.4258	22.8565	66.8443
23.1045	66.7427	26.5801	99.08	22.4573	67.1895
21.4181	67.1458	21.5696	99.2523	22.4062	67.4793
24.1827	67.4933	45.2091	99.8568	37.2707	68.075
29.1286	67.6354	33.8129	99.9106	22.1198	68.0859
27.579	68.1491	42.6572	100.218	23.0901	69.0172
18.2076	68.5645	32.7429	101.336	23.3261	69.5292
19.9297	68.8004	32.7814	102.121	24.4586	69.6144
20.8978	68.8346	34.7296	102.236	34.34	69.7751
27.0392	68.8802	37.7349	102.616	22.3383	69.7997
26.9424	69.4568	39.0979	102.688	25.9792	70.2096
26.821	69.605	27.1767	102.736	24.4919	70.2242
18.6739	70.3248	29.0375	102.815	27.6035	70.6149
19.2864	70.6924	28.8928	103.66	25.6406	72.0082
22.2798	71.5817	31.0231	103.788	38.2176	72.105
22.9939	71.6532	24.1891	104.652	19.1965	72.2618
34.43	71.9024	30.335	105.133	27.206	72.305
26.4218	71.9468	50.3724	105.435	26.2808	73.4046
36.7674	72.0947	37.8271	107.397	21.1749	73.5001
24.3606	72.2341	34.0509	107.888	25.7152	73.8046
21.5276	72.2877	28.0376	108.113	28.5246	73.8632
30.0824	72.3702	32.7803	108.222	38.9256	74.1343
24.0148	72.5841	35.4353	108.25	20.4425	74.4486
26.5447	73.0364	28.4054	108.308	33.9426	74.4623
29.7457	73.5276	25.2135	108.897	22.9939	74.7302
28.8665	73.5742	54.8807	109.587	22.6547	75.1365
20.2708	73.5771	50.4724	109.634	37.9748	75.1513
25.3628	73.5861	27.3666	109.669	23.8549	75.2019
27.1967	74.253	38.9774	109.739	24.6363	75.8377
27.278	74.3154	29.7915	110.996	21.5136	75.9083
28.458	74.8363	39.5883	111.122	30.0388	76.6101
25.7743	75.2779	38.0667	111.221	27.4951	77.3256
21.0328	75.4599	43.0191	113.127	28.1334	77.4826
27.0328	75.4599	35.9432	113.469	24.3205	77.5525
22.1263	75.6358	34.5989	113.816	28.3398	77.9455
15.8516	75.8084	36.6224	113.878	33.2718	78.8551
26.0112	76.4881	27.2952	113.885	22.3522	80.475
26.9153	76.6126	30.9766	114.144	22.765	80.4894
21.3273	76.7966	19.5764	114.407	21.6544	80.781
18.9084	77.1307	30.2289	114.46	25.5192	81.2027
29.8145	77.3012	26.1399	114.574	24.2295	81.4548
28.2159	77.7281	27.3582	115.946	29.3428	82.2442
22.2964	77.9665	25.767	116.038	29.8602	82.6939
26.1524	78.1975	37.5174	116.215	21.0878	82.9642
21.0994	78.4107	38.2277	116.452	23.3125	83.7825
28.6792	78.5108	33.2999	118.249	28.4312	83.9002
32.999	78.7161	21.4832	119.718	27.8364	83.9769
16.6851	78.9466	21.5467	120.325	24.3568	84.6304
24.1356	79.5511	33.9802	120.557	23.2612	84.9239
29.9658	79.6826	28.6414	120.799	22.8044	85.9672
31.6848	79.8523	40.2381	121.453	21.316	85.9979
28.6696	80.3071	30.6448	121.99	22.0423	86.0876
27.9371	80.7372	63.714	122.572	23.3898	86.4192
26.9274	80.8064	29.1433	123.102	36.222	88.5118
26.9921	80.8784	22.4958	123.407	17.0362	88.8837
28.0676	80.9608	34.9426	123.97	33.088	89.1817
25.083	81.0444	36.7899	124.555	22.8152	89.1909
29.502	81.5627	28.587	124.889	36.5706	90.0939
26.0526	81.62	40.8649	125.406	24.7542	91.0133
23.4472	82.173	29.7821	125.465	25.8306	91.8507
27.0932	82.8215	20.3486	125.648	24.4468	91.8589
25.1836	83.185	20.6485	125.69	31.6627	92.4552
21.4983	83.4259	32.0441	126.825	25.102	93.8416
22.2742	83.8692	21.5391	126.937	25.148	94.3019
21.8015	84.1617	48.3654	127.085	29.5649	94.6353
23.5539	84.6754	33.9507	127.169	26.4508	94.8829
22.117	84.7968	24.4251	127.719	41.0971	95.121
25.1165	84.9475	52.6157	127.906	19.2641	95.4334
25.3943	85.0394	38.8258	127.913	23.5342	95.5917
27.5718	85.867	22.8094	128.25	31.3118	95.8529
29.5093	85.8944	35.5485	129.087	26.0531	96.0041
20.7165	86.2299	30.7156	129.486	25.4133	96.0856
29.3231	86.3302	29.015	129.498	20.0402	96.3046
21.3379	87.4005	45.1465	129.509	22.2759	97.4775
19.3746	87.4978	21.8653	130.134	34.2206	97.7731
28.8141	87.5537	33.1611	130.206	24.9747	97.7779
28.7809	87.7201	50.4022	130.207	27.8004	98.118
33.7123	88	28.7923	130.219	44.597	98.327
34.8856	88.3627	30.7016	130.652	23.7532	99.1601
23.4537	88.4501	38.3471	130.777	34.1933	100.253
23.6682	88.5893	34.4805	130.832	24.6843	101.289
31.3127	89.0811	28.8152	130.902	23.2248	101.802
30.8133	89.1372	31.3419	130.907	26.7914	102.384
25.5201	89.1605	47.1876	130.919	28.4361	102.656
25.5511	89.6922	35.1061	130.941	16.0271	103.224
27.1531	89.73	26.1539	131.237	34.8903	103.596
31.1178	91.0706	29.302	131.238	30.4307	104.303
22.6386	91.2844	38.8469	131.244	21.5359	104.869
23.1694	91.3168	22.9303	131.355	30.6602	105.022
24.874	91.4627	42.8245	131.913	29.5737	105.175
44.795	91.4957	25.2098	132.075	27.2294	106.837
29.9231	91.5183	55.9719	132.387	29.2123	106.97
29.123	91.6759	33.4345	133.803	35.2668	108.155
27.4814	91.872	31.8614	134.034	44.7658	108.17
20.9081	91.9295	20.7402	134.039	19.3995	108.179
22.9075	91.9768	32.6546	134.463	27.8931	108.184
25.3155	93.3505	45.831	134.736	27.7896	108.573
21.7777	93.3886	34.6063	134.944	23.2937	109.224
30.8973	93.5001	39.203	135.412	21.8885	109.844
27.168	93.6707	30.8272	136.146	28.809	110.693
41.2142	93.7087	24.8742	137.79	24.9763	110.948
27.9313	93.8283	49.26	137.817	29.8778	111.194
25.1188	94.5942	44.6209	138.316	27.759	112.554
22.6901	94.6213	31.2376	138.366	23.2251	112.844
31.0012	95.0284	37.8387	138.676	47.8928	113.44
19.8224	95.0841	32.6876	139.446	25.3137	114.381
18.9737	95.2355	34.773	139.511	26.2156	114.599
26.7468	95.5362	21.2959	140.018	79.8927	116.695
31.3645	95.6712	47.6709	141.161	24.7886	116.843
28.0721	96.9898	34.0617	141.525	32.4354	118.253
30.3845	97.066	37.529	142.153	35.9206	118.254
30.9053	97.1698	53.4409	143.016	24.5942	118.827
20.7277	97.3199	31.719	143.739	33.9361	119.808
26.5359	97.3305	37.2696	143.768	28.2712	120.054
31.7233	97.7627	29.2017	144.392	41.7504	121.054
24.6322	98.2985	39.8591	144.499	33.2869	122.369
24.4327	98.5489	29.4811	144.751	21.5456	122.976
24.8403	98.7697	63.8826	145.326	29.9964	124.418
19.8972	98.8715	45.6911	145.587	28.2485	124.6
30.4757	99.0622	56.7663	145.978	29.7906	124.911
34.6732	99.1972	28.6106	146.144	25.4905	125.083
26.2131	99.8292	33.9213	146.448	29.1901	125.284
24.7261	99.8538	35.4349	146.743	23.8445	126.033
31.4811	100.041	54.1596	147.224	35.9649	126.673
34.8968	100.069	30.9992	147.249	32.5142	127.191
26.7541	100.204	43.1133	147.273	25.6639	127.612
25.4334	100.399	38.0474	147.685	24.9777	127.653
39.0999	100.727	28.2638	148.693	18.0085	127.681
24.701	101.02	47.3242	148.717	30.5191	129.539
28.1269	101.527	35.3751	149.007	27.9811	129.746
20.2489	101.538	56.2155	149.055	27.617	130.302
27.3099	102.117	42.933	149.103	28.5834	132.713
22.5492	102.663	35.6102	149.117	27.0804	133.383
27.5744	102.983	28.7552	149.279	39.8363	133.529
39.4521	103.007	34.0256	149.658	55.1222	133.932
48.1209	103.102	30.4363	149.872	29.2163	136.659
28.9403	103.458	30.087	149.893	26.5532	137.24
19.8928	103.555	32.4832	150.687	23.4757	137.574
24.7555	103.664	37.0697	150.875	28.3748	138.56
27.7338	104.356	53.3493	151.55	43.3261	138.635
18.7085	105.859	23.4642	151.675	31.4165	140.304
23.0668	106.007	28.6183	152.141	25.4346	141.081
31.1005	106.017	25.5192	152.318	29.8477	142.587
26.7141	106.183	30.0497	153.097	27.8294	146.689
22.853	106.349	26.8313	153.431	31.072	146.826
34.4707	106.69	32.3153	153.688	43.6483	148.912
24.0511	106.863	25.0085	154.687	27.4038	149.462
31.5253	108.164	30.7287	155.163	38.1241	150.719
29.4984	108.282	42.1607	155.439	22.3619	150.84
30.4783	108.79	30.1046	156.418	26.4908	151.366
22.3532	109.459	34.4051	156.614	49.5835	151.37
24.68	109.654	41.2286	156.669	28.2521	151.389
24.0714	109.68	42.7861	156.81	25.0314	151.62
27.6165	109.706	40.2324	157.092	45.6288	154.32
24.918	109.767	36.5847	157.368	28.8425	155.337
28.3511	110.014	52.4344	157.99	32.3124	156.529
20.8996	110.09	35.2583	158.252	34.1791	157.591
24.3821	110.546	42.1287	159.228	31.929	159.083
34.9079	110.937	37.1656	159.375	28.8757	160.233
25.5492	111.405	21.279	159.963	20.6073	161.085
30.2234	111.808	32.3487	161.512	41.9236	161.779
19.9357	112.07	38.3255	161.634	33.3663	162.809
31.9964	112.303	30.6744	161.893	32.2475	163.41
31.4948	113.504	29.0988	162.327	35.816	163.831
22.9208	114.279	32.2196	162.518	30.1228	163.872
28.0325	115.139	41.1096	162.816	54.7318	165.687
32.2578	115.653	24.4455	162.994	26.4676	166.445
21.3373	115.797	55.9851	163.031	35.7805	167.111
30.7351	115.913	34.6974	164.081	30.7815	169.148
29.8962	116.572	44.0062	164.829	33.0615	169.899
42.2437	116.826	31.1294	165.096	37.9236	171.043
28.346	117.093	32.2469	165.566	25.0957	171.308
25.6164	117.24	25.2039	165.818	24.7524	171.624
31.2884	117.427	24.9578	166.982	47.7731	174.168
29.5036	117.458	32.2123	167.179	28.3018	176.267
27.6436	117.46	28.547	167.36	37.5223	176.918
22.0787	117.566	38.7454	167.482	36.4585	178.611
41.9337	117.891	31.7608	167.819	25.6885	178.862
29.5248	118.18	37.5863	169.002	34.7196	181.561
27.4226	119.07	40.7911	169.565	26.1065	184.496
29.7217	119.199	31.2452	170.691	28.0124	186.124
24.7498	119.206	20.4241	172.543	34.3045	186.839
26.2189	119.327	27.6516	172.875	46.4484	187.458
22.5135	119.346	23.0896	173.01	39.8493	189.392
28.0196	119.703	38.0289	173.112	25.7644	189.942
29.1949	119.818	28.48	175.294	17.7158	195.461
28.3728	120.024	26.5953	175.429	23.2636	200.048
29.7187	122.089	28.5551	175.728	44.7074	200.163
25.2288	122.149	24.3288	176.147	49.6915	202.475
33.9406	122.174	29.0365	176.148	19.2873	207.402
26.5012	122.423	38.1953	176.421	31.0217	209.698
29.7484	122.519	28.8532	176.872	33.9181	210.022
26.0587	122.571	51.6995	177.107	19.3155	212.368
32.2497	123.078	25.1134	177.681	33.8947	212.457
23.7777	123.632	35.9533	178.441	38.1277	213.813
26.2023	124.223	45.1064	179.56	38.5132	213.941
22.2828	124.931	37.0294	179.797	24.5872	215.499
26.1361	124.981	52.8949	180.183	33.7437	216.062
22.774	125.551	30.5938	180.7	58.777	216.39
25.6285	125.63	24.3355	181.903	32.3882	217.923
24.3088	125.775	47.2696	182.137	44.0079	218.191
28.4883	126.109	33.9614	182.477	32.5122	218.881
22.934	126.219	26.1954	182.521	31.9574	219.071
14.9079	126.831	24.4347	182.65	31.5475	219.361
32.234	127.077	29.6038	182.888	29.7413	221.015
27.7585	127.578	42.6524	185.176	42.9904	223.184
33.23	127.891	34.0841	185.323	28.6669	223.333
34.5901	128.573	22.5746	186.486	37.9106	223.373
37.8743	128.843	32.5386	186.496	27.0057	224.016
26.3853	128.983	27.5846	186.512	27.4065	225.085
32.5138	129.36	43.1271	186.612	23.2968	225.686
34.4167	129.38	23.4851	187.07	40.968	225.737
31.4026	130.174	39.2937	188.584	28.3185	227.366
28.6755	131.031	36.4988	188.631	23.6976	227.449
25.6233	132.822	43.6883	189.311	22.2665	228.409
26.0105	133.184	42.5246	189.824	33.5373	228.715
27.6134	133.31	37.3404	189.891	33.6192	229.153
31.8231	133.368	23.8889	190.354	24.7785	230.44
20.7028	134.364	32.5286	190.687	40.5829	230.494
36.0751	134.634	35.9712	191.131	39.9498	232.753
35.9562	134.97	31.0531	191.274	34.8867	232.927
19.3141	135.775	41.5105	192.005	40.6925	233.118
21.2155	136.266	57.1371	192.203	39.9478	233.37
22.4161	136.394	40.0277	193.81	42.6458	233.745
20.5171	136.472	35.68	194.015	23.3729	237.393
19.688	136.703	23.9804	195.151	26.3293	238.682
25.0415	136.966	40.5031	195.574	29.6416	243.234
24.3843	137.084	37.206	196.556	45.4856	244.711
26.0323	137.625	26.8892	196.954	29.5069	245.962
25.4575	137.73	42.891	198.782	47.8186	245.962
33.6668	137.817	37.5692	198.885	33.0141	247.051
34.7089	138.063	37.5692	199.046	33.485	247.194
31.4405	141.404	28.699	199.652	31.1516	249.818
30.5622	141.593	49.7766	201.078	39.7215	249.989
31.7468	141.615	24.2059	203.237	30.1278	250.204
22.8035	141.663	38.346	203.356	27.935	251.09
21.5644	141.787	24.0461	203.645	29.8093	251.738
44.8825	141.843	41.4943	204.144	30.8404	252.418
31.8347	142.554	29.3914	204.874	50.9072	253.116
27.8369	143.242	19.9395	207.305	29.0771	254.243
25.6013	143.929	37.4928	207.947	28.3092	254.279
32.0158	144.772	44.0911	209.97	36.399	254.818
25.9586	144.808	37.1146	210.259	56.5749	256.161
27.459	144.818	50.4896	210.752	40.3895	256.291
22.1585	145.231	45.7614	210.758	20.3218	258.591
25.9569	145.578	41.91	211.456	42.1128	259.03
24.6865	145.607	39.8152	211.598	42.75	262.68
32.1215	145.638	59.3265	211.684	42.704	262.88
20.8787	145.941	46.0184	212.418	41.9201	264.931
33.7794	146.064	58.8336	212.521	37.492	265.545
27.0098	146.258	33.8899	213.054	33.5899	265.601
26.6476	146.309	20.6344	213.09	40.547	265.893
20.3686	147.018	23.0404	214.346	36.2165	267.484
28.4193	147.349	30.1499	215.42	47.0609	268.107
25.7593	147.482	55.8153	215.948	49.2371	269.487
29.7011	148.565	45.7727	216.131	26.4523	270.496
26.5682	149.517	34.6215	217.132	52.1342	272.049
28.6105	150.435	33.1054	217.404	34.8499	272.757
27.9056	150.899	28.2511	217.696	28.8653	274.098
24.6389	151.244	30.3763	218.418	45.0103	275.542
32.5141	151.365	35.1138	220.608	52.5498	275.858
39.8301	152.6	35.495	221.283	24.6435	277.309
41.3227	153.041	41.1926	221.669	53.4072	277.628
33.7655	154.893	62.945	222.109	30.926	277.994
28.896	155.428	29.4614	222.981	43.4875	279.884
24.025	155.523	46.3735	223.662	35.076	279.924
37.2559	155.89	35.4784	223.884	28.8636	284.03
31.2987	156.152	33.0768	226.168	41.0901	285.079
35.862	156.83	43.3285	228.714	45.3016	285.457
19.0852	157.731	37.2872	229.073	48.2679	287.901
30.4648	157.754	45.7715	229.105	24.6257	288.448
29.6485	159.802	31.2686	230.231	38.0856	290.424
30.7735	160.185	23.7186	230.235	34.79	290.89
30.7708	160.768	45.6902	231	19.8749	291.094
27.7978	160.858	37.1306	231.521	35.9289	292.435
30.0201	161.467	24.9263	232.09	32.8363	292.819
26.2713	161.828	33.3093	232.271	52.2409	293.301
27.2147	162.054	48.507	232.935	27.6844	296.562
37.7558	162.131	37.5279	233.459	31.4646	297.025
33.5224	162.185	43.3401	233.65	44.187	298.46
39.6609	162.489	29.6851	233.781	49.577	299.017
35.807	163.246	36.8964	234.024	47.1435	299.958
22.1492	163.574	38.8907	234.371	32.6354	300.511
24.5568	164.034	39.8237	234.593	33.3237	302.833
37.9519	164.135	36.2063	234.64	49.5044	304.726
27.7784	164.439	33.4472	235.298	34.1352	304.842
31.9002	164.539	40.1896	235.317	38.9737	304.994
24.2298	164.579	43.2484	236.832	49.1363	305.012
29.6702	165.227	33.2777	237.243	49.2841	306.027
30.2963	165.41	39.1589	237.339	30.8125	307.007
35.2412	165.54	35.7755	238.356	40.0303	307.886
49.8556	165.864	21.8012	238.531	46.1407	309.23
26.2567	166.159	25.5326	238.785	38.8602	309.554
26.629	166.777	38.9886	239.261	26.4011	309.952
32.2961	166.906	31.3229	239.488	33.0612	310.131
30.0939	167.171	49.7586	239.976	40.9089	310.471
34.8211	167.801	37.6329	240.65	35.0186	312.962
28.012	169.093	47.7549	242.135	17.3223	313.979
22.924	169.347	32.9493	242.153	37.8204	314.878
41.1676	169.959	28.6429	243.252	28.1198	318.184
28.5291	171.375	19.0906	243.267	42.3207	318.286
22.5537	171.448	52.5147	243.346	28.3324	319.349
40.5932	172.19	26.6324	243.403	37.5216	321.228
42.1221	172.2	37.8892	243.425	35.635	322.202
22.6433	172.518	44.4334	243.44	31.9959	322.967
25.2526	172.55	35.7892	244.088	49.9634	323.627
21.9926	172.551	25.0297	246.721	45.058	324.449
29.6492	172.71	39.7906	247.971	40.4736	324.718
36.416	173.753	31.169	248.522	44.8587	325.026
32.3033	173.776	38.574	248.72	45.3341	325.197
19.2913	174.021	38.7356	248.855	52.4339	325.757
32.718	174.242	43.3832	248.98	46.5112	326.286
29.7906	174.642	37.3741	249.098	43.3462	329.319
30.0042	174.8	31.9176	249.209	49.9113	330.196
33.4262	175.029	32.4295	249.796	26.8849	330.948
32.376	175.302	26.5	250.104	24.0143	333.361
28.225	176.378	27.2287	250.311	37.4109	334.474
33.8044	176.846	42.9712	250.81	33.9952	334.622
28.4343	177.261	29.5257	251.118	25.1208	335.891
28.4748	178.348	42.298	255.446	27.2381	339.121
27.3933	178.398	23.289	257.123	41.1538	339.394
21.6226	179.461	40.4735	257.461	72.373	342.742
30.374	179.686	27.0877	257.975	37.2326	346.758
31.9864	180.989	29.541	258.504	50.5227	348.641
30.0799	181.387	39.1609	258.693	57.2789	349.566
28.0346	181.927	29.3555	258.717	34.6898	351.738
24.5758	181.949	28.5238	258.729	25.0528	351.783
22.4219	182.006	34.8836	258.767	28.8955	353.249
28.671	184.716	24.9499	259.194	27.1691	354.973
32.702	185.187	35.6317	259.652	31.3307	355.525
30.9113	185.673	54.9845	260.121	56.0958	355.779
27.8949	186.901	26.8081	261.529	33.2304	356.601
30.1502	187.741	56.3865	263.715	49.6615	356.629
26.7412	188.008	48.0714	264.355	46.045	356.819
36.2944	188.057	37.7714	265.486	37.3759	357.729
30.7661	188.562	44.9032	266.023	51.04	358.995
31.8568	188.626	34.6666	266.477	28.9798	362.334
22.7843	188.708	44.1714	267.143	38.9733	363.47
33.8413	189.254	33.9791	268.523	37.9105	363.851
23.5453	189.575	33.9397	268.723	26.079	364.745
27.2138	190.912	37.4653	269.086	26.7881	366.023
29.8003	191.178	36.4135	269.23	44.6996	367.123
30.2809	192.787	27.1705	270.026	19.9258	367.627
34.8006	193.475	27.9989	270.718	40.6919	369.416
19.6676	193.63	35.8061	270.766	23.9117	369.56
24.5219	193.659	41.8968	271.088	28.0716	372.162
23.6663	194.071	55.0348	271.683	66.5253	374.497
18.0472	194.903	45.055	272.408	18.5196	375.952
16.9056	195.614	43.7236	272.888	31.5151	377.999
49.483	195.707	32.5931	274.956	43.875	379.661
37.5044	195.905	36.9886	275.546	41.6802	380.657
34.2023	196.255	34.6695	275.889	40.8398	381.386
32.8745	196.958	48.7278	278.099	31.4085	383.027
26.9132	197.103	32.9801	278.493	49.9332	383.11
25.2316	197.278	36.1818	278.717	34.5112	384.34
35.1667	197.928	42.6925	280.582	50.1049	384.521
25.2495	198.42	29.8072	280.732	41.5387	386.42
29.1599	198.635	33.6117	280.983	37.7259	388.03
34.7029	198.906	31.1484	281.027	47.8439	388.18
32.3619	199.255	35.1072	281.976	30.9637	389.689
29.809	199.263	57.1069	284.664	34.3789	392.226
30.4282	199.754	41.0905	285.468	36.1902	393.245
39.9831	199.929	42.4636	286.218	53.8591	395.443
29.7127	200.297	59.6848	286.806	30.3628	396.607
32.1739	200.441	58.1444	288.274	22.4761	400.905
37.1176	200.454	44.5216	288.406	38.863	404.362
27.9824	200.506	39.5665	289.208	53.2698	405.491
34.6485	200.903	41.6608	289.929	38.2908	405.76
32.5999	201.224	44.9316	291.171	39.6625	406.134
23.0847	201.236	43.4587	292.542	38.1953	406.201
29.9066	201.293	27.7166	292.774	36.9332	411.301
28.1683	201.617	48.8302	297.654	37.0701	413.838
32.2598	201.867	59.882	298.196	48.5425	413.919
36.6742	203.361	37.7284	298.433	46.0229	415.169
32.6394	204.213	28.8845	298.853	40.9151	415.585
30.6903	204.462	26.8989	300.055	38.6377	415.661
30.6202	204.773	34.7941	300.084	30.1207	415.705
53.2038	204.951	48.4632	300.204	51.5548	416.308
30.746	206.012	43.2061	300.749	56.0738	416.988
34.8824	206.18	34.6665	301.311	30.167	418.794
33.9166	206.24	25.4209	301.783	36.3017	419.729
31.672	207.692	45.8714	302.337	47.0396	419.859
24.6403	207.989	30.3604	304.726	34.8328	421.396
30.1992	208.599	36.3796	305.58	32.8935	422.555
32.0561	209.171	32.464	305.83	75.8734	425.877
30.5747	209.858	31.572	305.85	27.4826	426.366
36.3469	210.402	30.9991	307.323	30.7253	427.816
30.6163	210.819	31.1366	307.412	48.4255	428.441
16.6199	211.327	42.2703	309.518	22.8904	431.929
29.2235	211.479	37.4618	309.926	35.8772	432.678
36.6995	211.811	39.9687	310	43.4763	434.185
42.9031	211.819	51.8213	310.296	39.548	435.414
33.7176	212.51	44.7272	311.794	42.2436	436.235
34.9655	213.789	47.2104	312.609	39.1286	437.509
43.9272	214.271	35.9105	313.662	50.8239	437.684
27.0261	214.678	49.519	316.273	27.8427	438.603
54.8046	214.709	41.5525	317.556	69.528	439.235
30.3352	214.775	41.022	318.378	49.1168	440.011
29.8449	214.877	44.1708	320.196	47.8662	440.68
31.6467	215.748	38.8107	320.757	48.5226	444.03
35.3513	217.189	43.3869	320.879	38.1692	446.27
47.186	217.38	15.9617	321.799	49.6176	447.955
41.955	218.187	30.726	321.858	49.2321	452.735
32.6559	218.422	28.3559	322.902	42.0063	453.537
26.6088	220.503	37.609	322.957	47.4572	456.004
35.064	220.732	36.2115	323.613	45.5987	457.167
25.3265	221.382	51.1657	323.726	61.6648	458.251
29.7979	222.244	35.1797	323.96	30.7326	458.564
35.5601	222.319	30.7633	324.405	43.3741	463.368
28.8955	222.745	52.0996	324.705	42.5014	464.023
37.6032	222.785	40.7539	325.084	51.7064	464.05
39.7973	223.291	38.411	326.537	49.4295	468.066
24.408	223.299	51.1813	327.409	44.5971	468.669
31.9547	223.361	56.9456	327.467	38.7093	472.928
28.7754	223.823	28.8272	327.809	41.4228	474.126
33.5033	224.666	45.5167	327.888	40.4241	474.851
35.2074	225.119	40.5045	330.238	27.121	475.216
30.7245	226.664	27.1367	330.855	34.1558	477.674
27.1072	227.364	44.9077	330.903	67.7875	479.396
30.3654	227.466	42.4632	331.94	36.718	482.595
38.1781	228.569	31.3025	334.293	38.2343	485.911
31.7882	228.921	37.808	337.225	48.1516	486.73
31.0633	229.45	28.9274	337.252	70.0069	486.936
43.5913	229.515	30.0361	340.307	44.2466	487.749
32.9458	230.88	54.5327	340.384	46.59	488.97
24.1948	230.92	38.8945	343.035	41.3576	489.182
37.373	231.115	34.3779	343.398	40.8934	494.197
30.2618	232.265	40.6415	343.76	23.5791	494.97
40.4654	233.093	36.6004	344.453	47.2942	495.371
32.8817	233.617	24.5399	345.692	54.3959	496.821
27.4216	233.855	42.8875	346.326	41.3994	497.586
34.6234	234.085	46.2528	346.451	36.7776	498.279
40.1086	234.485	43.2554	348.057	26.4594	500.836
31.0347	235.47	37.7642	349.261	31.1698	501.026
24.1869	236.517	47.9852	349.559	54.5948	501.975
44.2107	236.596	44.8112	350.822	31.734	503.349
29.9722	236.659	39.616	350.989	45.2373	506.251
28.2239	236.966	30.4116	353.805	39.8322	509.355
29.7111	237.164	52.1842	356.129	48.0865	511.146
35.3908	237.745	23.4885	356.444	22.9562	512.655
42.0932	239.233	40.8208	357.7	49.0612	513.305
28.5961	239.305	52.2479	357.857	40.9537	514.048
23.6563	239.382	48.965	358.276	43.2663	514.4
26.2236	240.025	27.5778	360.226	33.1491	515.285
38.4321	240.46	21.745	360.79	41.709	516.004
29.78	241.006	41.5818	360.811	52.221	516.229
28.4859	241.144	47.5675	361.062	44.9378	516.318
35.2568	241.762	38.8815	363.107	48.0372	517.841
28.1058	242.591	36.585	363.352	27.9662	519.552
24.8547	243.413	26.3663	365.638	45.8225	520.605
30.396	244.603	63.085	366.783	50.9976	521.369
31.0978	247.1	44.2489	367.495	41.009	523.006
37.4529	247.931	23.624	368.826	45.6756	527.009
32.9674	248.187	35.1872	368.954	35.9399	527.237
29.7734	248.246	40.7524	371.355	32.2565	529.669
31.7304	248.866	41.3715	373.425	50.4993	530.925
26.9392	249.601	41.5211	373.556	38.1639	533.667
26.0196	249.858	50.2959	374.497	53.2675	534.521
35.9134	250.767	45.3081	374.8	39.4523	535.91
32.6715	250.813	31.7747	375.826	50.9124	537.074
42.0556	254.172	42.0229	376.009	36.8085	537.183
46.3821	254.834	57.6492	376.389	41.2886	537.541
33.8183	255.097	21.4434	376.742	38.3052	539.988
29.1276	255.99	49.6043	378.927	34.1304	540.959
28.5286	256.213	38.5437	379.241	50.8274	543.156
34.3487	256.385	46.4036	380.003	55.0432	543.25
27.1544	258.877	24.4267	380.073	28.4396	544.818
44.9931	260.509	39.1951	380.09	49.5195	545.665
44.5443	260.996	33.1295	381.693	45.5949	546.517
32.8755	261.813	54.3212	381.903	40.2517	546.535
36.1209	262.244	38.8169	382.491	41.1179	546.724
46.2426	262.428	28.6809	383.021	66.3244	547
39.8802	262.567	29.8118	383.823	45.4281	547.534
44.6911	262.693	50.4048	384.63	28.8003	548.178
31.4077	263.019	53.607	388.039	38.0419	548.223
52.6475	263.036	51.5687	391.311	31.6251	548.521
39.6142	263.541	44.764	391.817	33.5852	549.231
54.6326	264.088	48.8018	391.96	43.109	549.702
24.4577	264.542	40.7828	392.072	47.5785	553.592
31.86	265.208	47.3597	393.111	46.8217	555.498
27.2343	265.497	48.5093	394.122	46.0911	557.379
35.1117	265.564	30.8437	394.137	31.2127	558.288
31.6098	265.908	31.9272	399.338	43.663	558.922
34.3037	268.504	49.37	400.331	47.0565	559.109
19.6339	269.675	34.0103	400.908	46.4413	560.04
49.7181	271.103	36.6398	401.018	40.4047	561.807
31.7184	271.221	48.6003	401.244	50.69	562.022
32.0387	272.965	48.4222	402.008	48.5817	562.783
31.4756	273.479	29.8434	403.615	48.0624	563.575
36.5052	275.169	44.1854	404.914	27.2146	563.965
32.1776	275.657	29.1786	405.093	46.5626	565.916
29.4304	275.691	42.4395	405.958	52.8888	566.729
32.0432	275.854	48.2046	410.014	51.4905	567.526
31.2204	275.989	38.3824	410.781	42.7215	568.864
42.6512	276.647	45.189	411.744	40.8631	569.063
31.9675	276.711	34.8394	412.181	32.0116	570.526
34.0507	277.056	29.5544	413.586	40.4158	572.973
19.408	277.906	45.7314	414.837	44.6139	573.164
35.2732	278.934	32.3886	417.575	29.959	574.179
40.7547	280.279	39.7312	418.377	44.6413	574.235
29.2712	280.93	47.9595	418.931	37.2037	574.506
30.9346	280.987	31.7644	419.742	48.4452	575.35
38.4843	281.416	41.0446	423.5	43.5761	575.791
40.3277	282.562	46.7333	425.984	39.7031	576.697
23.1413	282.76	47.5323	426.111	48.6464	577.748
33.3092	284.57	27.927	426.479	41.8367	579.448
40.6808	285.145	39.6716	426.651	41.4664	579.893
33.8305	285.821	30.1955	431.35	44.9917	580.502
33.5497	286.505	52.7931	434.506	45.0016	582.97
29.6381	287.284	38.2352	435.042	20.8813	583.198
34.9894	287.337	40.113	435.048	44.4889	583.777
27.5667	287.776	25.9956	436.129	57.7354	589.764
54.7608	287.791	59.5698	438.626	54.4277	590.015
29.5505	290.22	45.9749	439.432	35.2375	593.65
23.2859	290.57	51.5531	441.578	57.7528	594.868
44.6918	290.656	43.3574	442.473	49.4007	595.015
23.5682	292.335	40.6372	445.813	54.5705	595.089
33.5576	292.928	41.3227	446.644	27.2388	595.631
35.9699	294.336	46.1963	449.964	51.6131	596.973
39.0362	295.168	42.4094	450.398	40.9748	598.598
31.2259	295.463	50.8809	450.527	41.3602	598.625
25.0462	295.695	51.3943	452.974	40.1642	598.801
15.09	295.861	37.8078	453.086	36.416	599.423
39.3535	296.023	50.1937	453.94	44.7465	599.457
30.8019	297.015	47.1634	455.085	42.5501	600.201
25.3843	297.531	59.4894	455.996	26.3827	601.539
31.0964	297.586	42.5437	457.93	47.1015	602.121
30.7927	297.813	45.1555	458.886	41.9726	603.211
35.6406	300.734	62.3781	459.151	45.2434	603.409
31.8026	302.348	50.1272	459.176	46.8368	603.694
22.1547	302.392	54.7721	460.928	55.2557	604.289
34.6375	303.067	39.9101	461.721	39.551	607.544
27.7431	303.854	63.4878	462.602	46.9669	608.194
30.8033	304.808	49.2727	462.783	29.0051	611.162
35.5421	304.846	34.7668	462.98	53.7326	612.578
46.8241	306.678	55.9376	463.274	21.204	614.016
33.9244	307.355	51.39	465.424	34.664	616.226
36.4945	307.518	28.8642	465.488	28.6001	617.131
27.6446	308.702	37.1028	466.091	53.5513	620.089
36.8604	309.447	34.3056	466.152	56.741	620.265
43.8615	310.014	41.6864	466.407	32.8361	621.546
34.1723	310.591	32.7938	468.097	29.5235	622.611
42.3398	310.693	37.0013	468.637	55.0696	625.556
42.4407	311.149	40.6871	469.63	28.6483	625.736
30.0645	311.367	38.7628	470.855	44.7381	626.229
38.2376	311.665	42.1795	471.073	47.1701	632.908
32.1178	311.701	30.9221	471.27	45.572	638.924
20.4657	312.107	35.9931	471.593	36.3522	640.341
27.9901	312.428	47.7372	472.253	54.6007	641.486
34.4416	312.847	47.5521	472.913	44.8664	642.342
39.6666	316.076	38.6748	473.463	39.4059	643.275
29.487	317.748	39.7701	473.933	38.0206	645.569
23.7743	318.058	45.0022	474.393	46.7812	648.501
25.801	318.135	42.9185	477.429	35.7934	649.998
35.0733	318.851	53.5654	478.108	53.0965	650.036
28.36	319.411	52.6372	481.016	35.3452	651.23
35.4518	319.416	42.2454	483.112	48.2815	652.237
30.9898	320.865	39.7255	483.228	37.2222	653.609
43.048	322.072	42.8187	483.357	53.3755	654.251
29.8405	322.963	43.7197	484.457	25.9715	656.255
43.9659	323.51	31.8127	484.706	36.3044	656.33
39.155	323.841	43.2604	485.705	40.6357	658.748
28.132	325.791	56.3477	487.9	53.4209	660.27
43.0378	327.278	50.6146	487.959	39.246	668.227
37.9653	327.829	48.4772	488.277	43.425	669.186
33.1881	328.214	39.951	489.128	34.9972	669.564
32.3143	328.392	40.6839	490.575	44.2464	669.709
21.0357	329.522	72.1482	490.654	37.6673	670.273
37.3278	329.998	38.0917	491.81	42.1587	674.93
25.8712	330.784	41.1962	492.887	44.7445	677.106
34.8854	330.799	57.7589	494.506	50.6725	682.397
33.5427	331.343	48.0072	496.602	52.3135	683.463
35.3075	331.788	44.7582	497.731	53.7485	683.472
31.4516	332.337	40.2371	497.787	32.3015	684.523
35.4934	333.233	71.042	500.132	27.4617	684.789
47.1231	333.882	46.6947	501.468	42.5925	699.625
33.4434	334.619	50.9926	501.939	49.8795	699.789
62.4823	335.148	52.1863	502.276	33.4327	701.694
87.425	336.436	52.1132	503.557	45.2761	704.598
38.0121	337.499	50.4482	505.107	70.1417	708.332
34.9224	338.107	39.5525	505.626	31.2537	713.484
32.3386	338.551	31.7415	505.955	49.2582	714.169
33.2684	340.35	52.7191	506.06	53.2148	720.69
47.4045	340.757	43.562	506.442	45.727	722.118
35.824	340.868	48.7761	506.622	41.3511	724.875
23.0521	341.201	52.4143	507.816	45.7054	726.403
26.547	341.242	44.4562	507.949	42.5649	729.273
40.0373	341.758	49.7428	509.426	49.6456	731.466
35.9352	342.663	33.7741	513.728	66.4858	731.491
30.3936	342.71	52.5876	514.252	34.6928	731.574
27.3372	342.93	52.5917	514.775	40.1415	732.355
26.9947	343.35	49.4718	514.79	42.7722	732.7
43.4852	343.663	48.9428	515.294	41.3719	732.962
23.8784	344.106	46.6965	515.592	34.8564	733.061
36.8934	344.645	45.3411	515.763	48.7782	740.426
41.2522	347.139	48.8375	519.206	61.1529	741.217
29.427	348.26	46.8606	519.699	44.5576	743.1
26.9795	350.456	46.6509	519.711	51.1689	743.257
31.2315	350.734	39.75	520.531	49.7018	744.942
40.3531	351.858	23.8921	521.446	47.2787	747.927
35.982	352	49.7984	523.956	36.4502	749.435
33.9215	352.847	34.4885	524.555	45.2405	751.18
37.8359	353.868	39.1336	525.254	43.0704	753.743
31.3676	355.092	36.2472	528.197	40.4456	757.041
33.2501	355.287	39.3297	529.557	47.2358	762.328
47.3353	355.475	70.215	530.38	33.0789	763.647
41.0322	357.274	45.1034	531.087	39.8743	764.151
29.953	357.326	58.9719	531.571	38.9245	765.306
43.3092	360.255	41.6943	534.479	56.1154	767.529
33.0861	360.396	36.8731	537.188	51.9969	776.057
39.6839	363.1	41.3991	537.768	47.7599	776.823
27.3606	366.402	53.0619	540.144	35.8211	779.502
40.5624	367.813	33.5877	540.435	52.3596	780.063
46.6348	368.268	42.9594	541.016	32.986	782.015
35.3843	370.959	41.4274	543.871	42.2468	782.708
41.5864	372.344	50.6255	544.943	45.6518	784.192
36.1639	373.641	50.086	545.565	54.8556	787.007
33.58	375.05	48.9136	548.793	39.6279	788.35
29.6404	376.156	52.0972	548.906	46.4741	794.027
38.6255	378.735	43.7825	548.971	46.9218	799.398
32.6672	380.052	42.6474	549.484	49.529	802.446
36.7411	380.984	57.7168	550.896	54.1626	802.776
39.4763	381.403	51.9021	553.935	50.2947	804.299
37.6609	387.848	43.9326	554.654	55.6162	807.453
48.7715	388.216	44.6263	558.48	45.5802	810.822
32.3126	388.554	39.4267	558.815	44.7	811.303
37.3228	390.972	37.4059	558.995	30.5419	811.532
31.3069	392.75	45.8868	559.297	46.5247	812.367
73.3772	393.018	47.8448	559.749	57.7763	813.042
32.1505	393.934	60.1467	561.532	55.4835	814.905
20.0124	394.12	48.651	563.008	67.8608	817.412
39.2874	395.988	46.1352	564.062	46.5122	821.83
39.8545	399.062	56.925	566.613	51.0979	827.396
38.9259	399.661	47.6153	568.095	42.5738	830.076
34.4316	400.713	46.9668	569.457	44.2518	832.468
44.705	406.793	50.1927	570.565	48.5109	832.735
42.1498	408.53	38.0192	572.154	53.7337	834.105
25.0296	409.274	51.5778	574.3	38.5927	838.532
37.663	413.159	70.102	574.858	48.9086	839.202
26.8331	413.948	43.7588	575.404	29.852	840.225
40.2744	414.732	38.1966	576.677	50.7636	844.396
33.4074	415.793	32.7419	578.193	56.0669	847.629
44.3799	417.303	53.5989	580.598	44.5763	849.885
28.113	418.696	62.0019	581.417	39.1443	851.493
61.2799	420.909	33.6922	582.344	47.248	854.822
34.667	422.595	42.3581	583.798	44.7666	858.343
44.1619	424.1	63.2626	585.716	38.026	860.538
30.1794	427.241	36.5123	587.512	45.5641	864.082
31.0381	430.795	42.9681	587.569	79.2096	866.116
28.9004	431.337	34.4199	589.445	48.9126	866.582
29.6491	432.326	39.912	590.029	47.0492	866.644
34.9947	432.361	44.8571	590.921	56.2778	866.994
34.3887	436.882	41.7763	591.158	50.7297	870.22
28.8892	437.818	53.1059	591.412	50.3377	871.47
34.1003	437.821	42.5584	592.296	45.1129	874.146
28.7394	437.88	50.1336	593.154	44.5731	875.589
33.3987	439.483	39.8234	594.24	38.4967	876.485
45.1866	441.479	49.7702	594.993	43.7813	878.68
43.2273	441.587	43.3018	595.676	51.9996	878.902
41.3882	443.702	37.0352	597.167	49.6524	880.32
39.1201	446.904	49.1474	598.129	48.2685	881.628
32.7678	448.125	39.6351	598.401	60.5406	885.731
40.4029	456.324	49.2961	598.635	52.8894	888.824
30.6433	456.612	46.4895	600.874	36.7712	892.984
42.6168	459.043	41.5737	600.944	42.8552	893.27
23.2264	464.1	54.904	602.16	45.7372	895.783
33.0378	467.814	51.7945	602.269	51.6249	897.308
32.8899	468.945	44.5993	604.677	58.2919	900.386
33.1139	469.285	47.9924	605.629	47.9599	903.747
48.2344	469.947	73.4435	605.926	41.0717	904.025
36.9847	471.265	50.7938	607.213	45.3371	905.908
37.391	471.539	59.6759	607.652	48.0047	906.59
40.3042	476.605	41.5676	610.92	33.7899	909.874
32.3252	484.459	47.2861	618.089	55.7729	912.658
36.2826	486.49	56.988	619.072	52.062	912.839
22.2694	487.391	49.0424	619.639	44.6245	913.566
38.2605	488.509	43.1188	619.862	54.4566	918.832
38.8767	490.773	40.6765	619.929	45.5966	921.452
27.9727	492.096	45.8028	620.063	41.9591	926.567
32.0709	492.241	45.0638	621.081	47.7525	927.919
69.4603	494.515	47.9355	622.649	46.6198	929.799
33.9478	495.177	41.2603	623.271	62.1903	930.568
39.3622	498.594	60.9601	624.186	64.1206	931.52
38.3928	498.63	58.8473	624.598	44.9626	932.458
45.791	501.729	43.3814	626.72	73.6755	933.801
37.9769	502.383	46.7918	629.658	54.8289	934.537
43.1417	504.038	36.0484	630.2	66.7503	934.703
56.2095	505.635	43.7808	631.856	51.9674	936.927
34.7264	506.161	50.5317	632.121	49.6421	939.159
42.5368	509.097	45.7831	632.611	52.0675	946.72
29.464	512.036	44.6023	633.912	67.5581	948.622
41.7331	514.547	33.4092	635.19	39.5678	948.795
31.1213	515.277	40.5472	635.5	70.9072	952.889
36.1888	517.402	51.4212	638.008	47.6885	956.227
25.3573	517.449	96.399	638.758	36.8211	959.852
47.0559	525.009	49.3404	642.127	67.4635	962.845
44.0201	526.983	46.3277	642.48	58.364	962.851
36.5167	527.001	39.3257	644.493	44.1557	963.98
28.351	527.345	43.1504	645.551	63.2596	966.954
48.0643	528.445	37.2054	648.965	79.948	970.856
47.0082	528.789	61.7698	649.132	36.2789	972.07
64.7629	528.851	47.3908	649.882	63.395	976.149
27.4388	532.054	39.6487	650.467	52.909	983.031
30.8329	532.668	43.2766	651.252	48.7664	985.803
47.7771	533.298	42.2901	651.355	50.2823	993.478
30.4088	533.457	40.6459	653.345	43.0404	996.693
37.0583	533.57	42.7554	653.744	62.918	997.189
32.7758	533.8	53.8176	653.979	35.4386	998.124
28.6182	535.598	31.5382	654.064	43.9586	999.754
34.0042	535.983	37.4205	656.505	45.4171	1001.42
43.4141	537.139	52.2895	657.212	58.8554	1001.52
41.6793	537.923	49.0255	657.759	49.3795	1001.97
54.9767	540.706	58.3318	660.537	50.4689	1004.26
33.0514	543.627	32.1529	662.225	36.4959	1015.21
45.9441	546.129	56.3457	663.262	44.4812	1025.94
44.0035	547.394	44.9321	663.432	42.5303	1028.4
43.3449	554.337	44.3822	665.606	68.5776	1042.82
26.8723	554.874	36.689	667.156	51.2522	1043.77
37.7826	558.162	67.2382	667.521	46.8246	1047.62
33.9362	560.569	60.9066	669.641	60.5134	1050.98
26.0289	562.828	53.4849	670.008	75.5761	1054.13
36.755	562.848	53.2153	671.402	51.3535	1054.91
26.6699	563.928	52.8131	671.908	52.7072	1055.59
19.8223	564.491	38.9461	672.912	52.4064	1055.93
35.9608	565.931	34.629	673.728	55.0534	1060.83
34.6671	566.942	40.5781	674.317	56.1097	1062.06
37.5701	568.017	44.0993	674.716	52.4358	1076.35
40.6697	570.452	44.2909	675.708	42.64	1078.05
39.9141	573.68	39.7313	676.331	64.2621	1080.97
27.2143	573.982	42.8066	677.024	56.6858	1086.36
33.7175	576.356	37.6542	679.772	51.5652	1086.92
40.0352	577.584	33.7057	680.005	60.691	1102.04
51.4451	579.1	43.5222	682.295	51.6172	1106.61
53.567	579.656	28.859	683.521	48.4379	1110.15
41.5197	579.829	47.6494	684.735	75.3403	1113.59
29.7996	582.823	46.1702	684.919	60.6273	1126.82
31.6852	583.872	45.6909	687.117	46.7609	1137
45.0306	584.018	52.2029	687.3	32.9555	1143.02
32.4662	585.733	57.8901	687.553	43.3503	1143.55
39.7309	587.326	40.9964	687.704	58.7499	1144.66
27.5911	587.663	37.7377	689.833	78.1012	1154.39
36.5393	588.563	51.9891	689.866	49.1645	1157.71
33.7491	589.099	35.0191	691.36	66.9622	1163.15
45.2039	589.849	51.5862	691.727	59.4104	1164.43
50.9785	593.143	67.8077	691.991	51.1248	1164.8
48.6678	595.142	43.4249	693.118	56.3399	1165.38
36.8417	595.148	47.7009	693.189	59.9896	1166.72
38.2123	596.539	67.1175	694.342	54.2011	1171.87
41.037	597.232	48.1993	694.362	46.7172	1179.49
41.9156	597.563	54.968	696.369	71.0108	1181.36
31.0566	598.719	46.7648	701.004	62.1973	1183.07
39.5638	599.152	71.2114	701.47	40.8369	1186.09
46.9962	599.374	42.9742	702.317	57.7998	1186.25
46.3132	601.508	57.5069	704.537	61.3763	1193.79
33.1447	602.015	44.1685	705.859	44.6057	1195.57
30.5613	603.06	34.6666	706.865	53.2798	1203.37
43.5589	604.082	45.205	709.048	47.2557	1204.63
35.7342	604.48	40.6857	709.434	45.5683	1204.95
43.0212	609.282	51.0378	710.04	43.3043	1205.69
61.9952	610.868	51.0021	710.65	51.7107	1206.68
32.5548	618.002	44.4791	711.406	62.3728	1216.73
50.8836	621.929	34.6744	711.87	67.0533	1231.63
31.998	622.03	48.9527	712.245	41.9077	1232.45
28.2366	626.095	53.8053	712.874	47.6373	1232.51
44.8919	626.862	31.3368	714.135	76.8781	1234.14
36.7315	628.762	45.4688	714.707	49.3482	1234.39
39.2415	628.841	37.2294	719.06	54.2865	1243.35
43.6537	631.152	40.1619	719.72	62.2229	1244.68
33.1103	635.118	42.5228	721.034	69.5007	1246.53
34.7611	635.777	45.679	722.773	49.5603	1247.12
72.4253	636.81	48.1214	723.428	59.1601	1251.96
43.1371	637.192	35.8138	725.371	54.1238	1260.62
32.2509	638.916	54.8781	725.58	65.1827	1263.38
40.1277	641.218	56.5307	726.037	54.8961	1265.8
49.8429	643.384	27.983	726.851	43.1582	1266.93
33.7146	645.774	59.7276	726.865	40.5135	1272.53
37.3713	646.365	49.1899	728.029	52.9259	1273.92
43.722	646.757	39.1833	728.875	42.7322	1274.08
45.1813	649.383	41.1809	731.237	45.6182	1279.2
40.7892	649.542	40.3628	731.51	71.5477	1282.97
34.7429	650.835	48.6269	732.004	53.5055	1283.25
37.957	652.766	45.3014	733.54	69.8447	1284.05
44.0597	655.629	40.223	733.777	65.5537	1285.97
52.6651	658.878	46.1761	734.685	61.4559	1286.07
45.398	660.315	55.8026	734.691	52.8305	1289.78
36.6239	661.117	50.3343	735.74	62.6044	1291.67
41.8729	661.61	37.2573	735.85	51.0987	1294.15
38.4324	663.07	54.422	739.892	51.1839	1295.2
48.2205	664.608	56.8877	740.382	76.9424	1299.09
43.2422	665.532	56.7272	741.402	51.191	1300.75
47.2134	665.827	50.194	744.092	74.9252	1303.53
38.3949	672.455	47.3796	744.342	55.7121	1309.92
41.601	677.423	63.0509	745.329	60.5977	1311.25
52.7935	682.055	59.4805	745.82	46.4478	1316.19
49.8006	682.295	52.5827	747.363	67.0145	1320.93
65.923	682.306	37.5755	749.627	58.5893	1321.75
44.378	683.878	27.9476	754.877	47.5087	1323.25
32.0319	684.865	53.188	757.784	50.2814	1323.46
60.0551	684.967	53.9858	758.33	56.2446	1324.04
38.6293	685.991	39.7113	762.359	47.6309	1326.42
41.5029	686.038	35.1438	764.295	64.2774	1332.73
30.2838	688.269	69.803	767.502	80.0228	1343.61
51.113	688.921	58.948	769.092	56.8571	1345.2
37.5229	690.551	53.3652	769.418	51.2605	1365.55
36.8766	693.451	30.8731	769.815	51.1109	1366.79
35.0462	693.891	41.932	770.063	63.8124	1367
51.3654	696.55	46.7563	770.116	67.3435	1367.29
31.7956	697.348	53.0272	771.31	107.268	1368.42
33.751	698.282	39.7062	772.375	35.9589	1377.65
40.1347	699.024	38.2117	773.177	54.959	1380.43
34.4744	699.468	64.1456	774.161	59.4493	1380.59
42.5934	700.684	47.0152	774.632	57.1022	1380.94
39.0474	703.757	39.0138	775.05	55.2472	1384.47
70.5711	703.77	73.8927	775.381	65.0884	1386.38
70.8728	704.766	48.2884	775.717	53.1504	1386.6
33.0567	705.857	54.4435	776.598	50.474	1389.77
48.323	705.909	44.3249	776.993	47.3504	1393.19
43.2446	705.982	76.0854	777.547	82.4512	1394.69
44.7942	706.234	40.2966	777.765	100.149	1406.35
37.3755	708.982	51.1847	778.638	53.4805	1407.7
46.0487	710.862	49.2327	781.397	62.4923	1408.04
34.7469	711.533	48.2739	781.71	65.9065	1413.61
59.2989	717.46	46.2148	782.941	64.8624	1413.94
35.9285	719.113	37.6072	783.586	75.9205	1416.82
27.6136	720.676	44.4628	785.444	60.5088	1420.07
28.5862	720.721	47.6816	785.458	46.4465	1424.22
39.6439	720.846	43.2709	786.376	69.8918	1426.82
47.7072	722.041	46.5854	787.699	74.962	1432.59
40.8035	724.541	55.6456	789.323	50.5617	1434.18
52.9671	727.364	49.9465	789.601	53.4349	1435.65
46.2454	727.501	40.2181	789.63	51.6213	1446.18
30.9524	727.52	39.9821	792.463	70.1247	1449.21
44.2624	728.079	54.7351	792.662	67.3126	1453.08
34.0897	728.112	45.6513	793.31	63.662	1457.45
38.4071	730.132	49.3393	793.466	75.5153	1466.6
35.0299	730.564	46.9717	793.675	65.2673	1469.62
50.3336	733.457	42.8505	794.051	40.5014	1480.97
43.3544	735.227	44.4988	795.337	55.9147	1483.39
39.9363	737.643	43.7902	796.416	52.2777	1484.91
44.09	737.805	47.5119	797.614	64.2464	1485.2
46.2332	739.763	51.2146	798.078	69.2524	1486.89
51.6641	739.793	49.9302	798.929	64.8365	1487.36
43.351	740.149	52.2641	799.514	43.9788	1489.87
31.8119	741.839	40.1488	800.337	61.5188	1492.43
50.4606	745.056	46.7393	800.358	74.8979	1496.07
40.6244	745.437	45.3765	800.841	54.7919	1498.52
32.5821	746.554	38.3896	800.967	56.5504	1502.68
41.8763	750.052	30.6323	800.968	74.7178	1506.41
35.3786	752.492	55.1812	802.499	59.9637	1511.54
45.6171	752.54	43.1351	804.813	59.7815	1512.54
40.6401	753.093	44.6952	805.322	58.662	1512.58
45.5685	753.211	50.9638	806.171	56.5313	1516.56
40.9065	754.889	45.9102	806.831	70.6492	1520.57
42.2481	755.97	44.3552	807.009	70.1107	1521.75
38.1432	758.779	52.8105	807.294	52.4714	1523.81
47.5647	760.186	41.6379	811.344	65.3265	1524.59
46.8179	760.275	40.0673	813.632	52.5039	1525.19
77.6577	766.074	47.577	816.084	67.1025	1527.41
46.7081	768.955	52.3538	817.255	56.665	1531.36
52.3969	773.14	75.2926	817.464	62.1309	1531.91
31.075	773.626	51.1703	821.112	40.7199	1533.88
46.5979	775.62	47.7705	821.146	80.1511	1542.39
50.2609	776.585	55.7205	821.752	50.4967	1545.06
36.792	777.342	44.1719	824.28	49.2609	1546.23
33.4142	783.066	45.493	828.065	52.1545	1548.74
48.446	784.397	36.9429	830.367	64.7944	1549.51
51.2279	787.767	51.7698	830.779	81.0497	1551.52
52.974	787.905	43.9061	832.185	65.2919	1558.8
33.375	788.39	50.4906	837.623	78.7779	1559.02
41.7889	789.319	46.2452	837.898	48.3669	1559.25
27.0887	795.023	37.8861	838.214	60.5955	1561.42
28.3424	795.181	39.5003	839.559	79.2341	1566.85
38.0081	797.371	32.2588	840.281	56.2717	1573.85
39.4775	798.494	38.7396	840.439	69.0834	1574.18
39.0999	798.796	55.9631	842.001	53.1073	1576.91
48.4052	799.234	49.7415	842.186	48.4442	1582.28
42.3239	800.662	59.703	844.691	75.4076	1584.67
39.9801	801.962	51.4002	845.395	62.6322	1589.82
44.6185	804.708	52.6406	847.569	73.7205	1593.57
48.2906	806.833	51.5063	849.809	90.0676	1603.18
45.6885	808.776	50.4208	850.561	70.2113	1605.86
35.1168	809.726	55.6842	851.363	55.4718	1606.08
28.0377	810.135	44.3027	851.385	57.8913	1610.02
30.98	810.524	45.3319	851.756	59.4219	1611.54
39.4848	811.948	49.339	852.194	49.0847	1613.77
34.8794	814.867	50.5213	858.292	50.9346	1614.92
83.0969	817.21	49.7596	860.615	55.1368	1617.35
61.1919	818.362	39.7524	862.802	66.9216	1619.18
33.2664	822.873	37.4817	864.605	53.4166	1622.88
48.693	825.918	48.664	864.688	60.2686	1636.67
34.5397	830.601	51.2097	867.961	62.9062	1637.26
54.3425	830.766	44.7594	869.033	57.8985	1637.33
48.8722	833.311	52.0043	870.213	44.1342	1637.55
33.3517	835.29	47.1173	870.621	73.2823	1643.71
47.8154	840.004	55.2183	870.743	57.029	1644.41
35.1291	840.226	50.7841	871.462	54.6463	1646.78
49.5179	841.081	43.418	872.415	64.4461	1646.86
45.3687	841.689	66.6619	875.34	66.3733	1649.94
29.4172	845.735	47.8953	875.507	55.2421	1650.88
41.1712	847.002	37.2326	875.722	52.8457	1656.4
44.2182	847.398	51.6946	876.761	57.1154	1661.56
50.6188	857.093	60.3058	877.823	58.286	1662.34
43.5259	857.322	55.0707	877.961	50.9603	1664.39
42.1013	859.503	42.8455	878.184	51.8321	1668.7
34.8551	862.209	41.3809	878.319	48.4349	1673.23
57.4743	863.039	57.0421	879.508	68.4784	1674.67
39.3833	867.994	37.1545	880.981	58.0569	1678.08
37.1012	868.638	29.8365	881.507	37.855	1678.95
43.2775	873.413	49.7325	885.133	53.6307	1682.04
68.7985	880.928	47.008	887.3	53.1532	1688.02
30.8351	881.979	55.1984	889.656	61.4001	1690.75
29.2692	882.094	33.3695	889.667	45.3205	1693.52
46.9823	886.944	42.4169	890.859	60.8675	1693.99
52.0703	887.547	56.1587	890.897	65.8088	1694.77
28.3244	890.206	32.3332	891.437	65.7743	1699.81
35.8677	892.657	38.947	892.179	50.9999	1703.1
41.9049	896.673	57.9166	893.497	49.6348	1704.2
39.5427	900.83	43.2025	898.555	79.5126	1709.25
53.4458	902.541	64.6859	899.221	53.7825	1718.11
40.6981	906.443	47.422	899.248	70.0341	1718.17
43.5394	906.959	50.3903	900.048	65.0525	1719.64
32.8729	908.76	48.6444	901.621	65.2867	1724.64
29.7887	910.026	44.5533	902.87	53.2314	1724.7
43.1249	910.754	48.0448	903.344	52.0632	1727.93
37.6782	911.414	50.3629	903.868	50.8679	1731.18
42.4654	912.076	41.0494	907.09	55.622	1733.44
34.968	912.178	54.8925	907.111	31.2831	1737.85
40.0938	915.492	39.7121	911.717	33.8513	1738.5
61.7665	916.218	51.5948	911.76	52.4118	1739.27
47.3379	916.87	52.5055	912.282	52.8089	1743.33
63.5798	924.621	49.9144	912.421	51.0312	1744.11
33.8292	925.932	49.664	912.729	59.6421	1747.03
45.8106	926.016	45.9597	915.621	48.964	1748.63
35.6797	926.387	52.8874	917.874	60.112	1749.67
40.8758	926.403	44.1192	918.458	67.8516	1753.69
57.8233	930.478	53.4563	919.668	62.5824	1759.29
53.3376	931.483	48.5588	921.59	60.2215	1765.18
55.6153	933.836	31.0595	922.095	38.1918	1766.04
27.2156	934.089	39.8553	922.697	59.9055	1767.41
69.2677	934.575	40.3824	928.483	58.8006	1769.12
51.8699	937.757	67.014	928.653	52.6564	1769.33
46.4827	937.966	37.982	931.498	57.793	1773.82
49.4	938.353	63.8006	931.658	59.8058	1775.25
34.3326	938.771	43.7291	934.332	61.1466	1778.76
47.0969	941.041	51.2916	937.15	81.9206	1783.21
65.1535	941.46	43.8483	937.824	48.2929	1785.08
50.5382	943.058	50.815	939.667	53.272	1789.17
42.9267	943.734	49.8624	944.024	52.6277	1795.68
35.0726	948.072	47.0506	945.002	61.9903	1799.59
39.3678	952.103	49.479	948.067	42.6901	1808.59
52.4918	952.532	39.0499	950.177	51.5205	1808.83
48.6686	955.081	49.6604	950.45	52.3292	1821.02
68.244	957.742	129.395	951.919	60.1095	1826.44
51.0453	958.425	52.812	954.292	79.3937	1827.08
65.1617	959.95	48.906	955.392	61.4008	1834.36
37.7285	960.203	45.5487	957.595	59.28	1835.89
38.485	962.831	43.9541	965.526	49.2912	1838.28
51.1596	962.939	58.5846	966.994	51.6006	1839.22
27.6542	968.316	62.0817	968.063	32.2956	1842.78
44.6137	969.912	50.8133	971.404	60.238	1843.08
37.2627	970.833	46.9597	973.804	71.6025	1850.26
41.2641	971.252	49.0439	974.326	61.833	1854.24
46.3454	971.541	44.0766	975.447	47.7672	1854.82
31.5641	974.583	38.5694	976.448	58.7218	1858.45
35.3544	978.208	72.495	976.6	63.9194	1862.9
63.8588	979.54	54.9403	979.252	49.1253	1867.13
37.1607	981.879	49.054	982.61	85.8894	1874.64
36.4953	984.182	49.9672	983.102	54.7662	1883.18
55.6044	991.574	38.9032	986.192	65.8819	1884.39
40.9636	994.057	64.587	986.337	55.4957	1884.43
47.8813	997.688	48.0076	986.948	57.7156	1886.76
43.5118	1000.36	43.2506	993.27	54.4681	1889.87
63.2465	1006.63	58.1818	993.777	57.5196	1892.32
34.0111	1010.33	37.8821	995.6	65.0204	1892.74
40.0224	1012.06	51.3482	998.996	74.1249	1893.94
59.9566	1014.29	49.8552	1001.56	63.133	1897.06
71.2419	1016.05	62.4328	1007.95	64.2889	1902.6
40.9539	1017.61	43.1897	1008.92	62.3247	1906.96
51.9721	1019.32	49.2361	1009.15	61.5425	1908.02
36.5258	1020.78	52.7722	1010.29	55.9862	1910.54
39.1417	1024.74	49.5635	1010.97	49.1145	1912.85
56.1433	1025.24	52.1899	1012.21	62.1883	1917.58
45.9077	1025.79	41.8307	1012.55	64.9085	1933.91
45.6651	1026.66	43.0561	1012.57	57.8932	1936.75
36.9247	1029.87	58.454	1014.17	74.4899	1942.09
35.6009	1035.94	40.2494	1016.09	56.7571	1944.66
38.8116	1037.11	55.162	1016.16	66.7757	1945.05
44.3963	1040.09	55.6645	1016.79	78.6383	1948.06
50.4672	1040.84	50.1647	1017.33	41.2991	1948.78
45.9792	1041.04	57.3476	1020.17	71.1705	1951.32
47.2992	1044.14	56.7126	1020.28	53.9709	1951.58
48.4027	1045.16	51.9556	1022.33	72.0428	1955.91
37.2043	1046.58	56.0997	1024.01	48.4635	1957.45
43.5158	1049.25	63.2925	1024.87	72.7243	1959.3
45.0681	1051.02	49.4949	1028.07	45.3618	1970.43
66.3518	1055.78	43.2184	1029.44	67.0243	1970.48
32.5808	1057.71	72.0748	1029.62	78.9442	1971.92
32.3908	1062.84	58.7813	1033.31	61.0151	1977.44
42.5166	1067.35	50.5581	1034.75	56.0871	1979.72
42.0926	1070.1	65.18	1035.67	42.2709	1990.23
47.0829	1073.54	42.0671	1035.8	73.2878	1993.47
81.0948	1075.85	37.3671	1036.77	78.172	1996.34
57.3218	1077.5	56.18	1038.65	51.4396	2002.93
42.6834	1083.02	46.4246	1038.69	62.0324	2004.24
44.9562	1089.73	57.2396	1043.94	60.1983	2005.13
63.46	1093.68	46.9725	1044.42	63.8007	2016.45
53.2066	1095.6	36.8903	1047.75	54.5393	2016.96
48.9733	1096.68	42.0902	1049.23	56.4512	2026.26
32.2768	1098.06	55.2267	1054.94	68.0517	2037.19
41.6793	1100.4	55.7412	1056.84	55.0019	2044.27
62.831	1104.83	45.7048	1059.36	63.7417	2046.12
31.4595	1105.44	52.6656	1060.13	79.4497	2047.37
57.8374	1108.03	42.982	1062.57	60.3057	2048.81
41.9099	1111.98	48.029	1062.83	71.4815	2061.33
41.4429	1113.63	37.4209	1063.13	62.9215	2063.21
40.3619	1117.35	45.4902	1065.63	54.7441	2064.07
37.8372	1121.7	43.174	1067.41	62.302	2072.91
48.6461	1122.23	46.2873	1067.61	43.1438	2076.51
51.7088	1124.28	50.6411	1067.99	60.7467	2080.03
35.9903	1130.6	43.4615	1068.4	52.9594	2080.48
35.987	1132.09	51.0891	1071.08	56.4794	2082.89
51.9672	1133.37	56.333	1071.5	60.7212	2090.65
61.3119	1139.19	49.5067	1072.99	48.5184	2092.51
41.5091	1141.58	52.7178	1078.36	58.9529	2097.68
44.1955	1142.78	59.3761	1078.94	58.9465	2102.46
41.9293	1143.7	36.2203	1084.21	101.796	2107.36
57.3939	1144.38	54.8887	1084.24	84.0498	2109.85
44.4116	1146.5	44.3753	1093.24	60.0152	2110.18
37.8768	1147.49	63.8628	1094.37	60.2768	2111.64
59.3153	1151.94	25.8506	1095.29	53.4177	2114.78
48.7999	1155.73	45.9965	1097.38	55.2126	2120.33
37.2533	1161.75	48.1929	1099.84	53.4193	2120.44
43.6941	1168.44	40.0071	1100.07	70.7998	2121.9
42.1049	1169.3	54.2579	1104.05	69.9975	2123.98
50.1699	1170.81	57.2115	1105.69	46.7818	2131.58
34.6398	1171.35	46.3002	1106.86	65.3106	2133.74
50.5098	1171.39	44.9229	1109.9	61.605	2137.66
35.9844	1175.89	47.4236	1109.9	46.7432	2142.04
36.6029	1180.48	60.4325	1111.03	61.462	2144.79
61.2858	1181.76	74.3098	1113.03	58.3287	2148.56
90.7101	1182.81	47.2306	1115.58	52.9909	2152.25
40.3537	1183.08	50.3155	1115.7	42.9274	2155.03
40.9366	1184.31	70.3182	1123.32	84.1481	2155.07
64.642	1184.73	44.7716	1125.5	56.5064	2161.55
41.5873	1186.31	60.8958	1125.82	49.4585	2162.91
40.0242	1186.47	44.2176	1125.87	56.504	2170.47
36.7914	1189.03	44.0174	1126.85	70.773	2176.62
49.6619	1194.78	42.4721	1130.38	43.1449	2177.9
67.82	1197.16	40.3264	1130.56	65.0796	2179.52
48.0568	1197.67	50.7899	1130.63	48.8508	2180.1
35.8286	1197.88	68.5416	1138.08	71.5141	2182.56
43.3013	1198.2	59.2539	1140.67	53.6318	2183.05
37.8031	1199.77	57.5351	1146.29	58.1045	2183.17
56.4186	1200.36	59.9242	1146.68	74.8569	2192.55
51.5196	1201.59	46.205	1146.95	43.8493	2195.41
55.8693	1205.4	47.2696	1149.47	57.3935	2195.96
46.6528	1209.39	38.2139	1154.3	63.5038	2196.71
35.1677	1213.34	64.7554	1163.08	56.0112	2199.46
34.1074	1214.59	51.7036	1163.22	73.383	2205.73
55.6985	1215.17	42.0081	1168.21	66.434	2212.07
63.8203	1216.06	52.3313	1169.07	57.7141	2215.61
54.173	1227.91	46.9575	1170.63	70.4279	2216.9
41.7686	1231.7	40.8701	1171.78	84.2666	2225.92
58.8855	1233.53	39.0211	1174.69	74.3906	2229.18
37.3404	1239.6	52.0589	1175.87	69.6616	2230.73
43.7712	1243.73	53.334	1175.98	49.1534	2236.1
50.7083	1245.35	44.8141	1176.45	57.6556	2238.24
40.6291	1248.07	35.1905	1178.53	53.9238	2239.95
56.5065	1249.9	47.209	1178.83	55.6895	2240.19
65.7828	1249.96	48.2218	1178.89	63.8207	2245.6
63.2196	1252.42	56.9216	1182.64	67.008	2246.07
42.3685	1252.87	59.6103	1184.15	70.0718	2250.06
43.2906	1255.28	50.9198	1186.15	69.187	2274.96
42.6625	1256.24	42.8706	1191.65	79.9285	2281.12
49.687	1258.01	61.4928	1192.01	77.5915	2288.23
51.2251	1258.47	44.7761	1192.39	82.3936	2296.97
35.349	1260.68	61.149	1197.16	61.0914	2301.44
66.0376	1265.88	50.4256	1202.28	49.9079	2303.01
59.7152	1269.7	43.0824	1208.57	70.5956	2303.94
52.7623	1271.78	54.3204	1212.4	74.4237	2311.05
43.2127	1274.46	72.3038	1213.12	60.6335	2317.57
57.6614	1275.75	54.2048	1217.48	47.5207	2324.05
47.2609	1276.05	47.4629	1219.62	78.0129	2326.82
40.593	1282.64	36.7574	1220.49	77.8467	2328.05
32.8395	1282.94	91.741	1224.97	94.9638	2334.54
54.6212	1289.68	49.9621	1226.61	72.1417	2337.14
43.7273	1302.36	45.7072	1227.27	72.914	2339.65
60.3322	1311.2	50.3556	1227.31	62.2474	2357.68
60.4101	1314.37	43.5092	1229.19	39.4416	2369.36
66.5665	1323.7	47.0424	1229.23	65.0032	2372.93
61.0345	1335.29	50.0294	1231.37	47.7399	2373.99
36.8637	1337.86	80.7795	1234.46	70.8165	2374.16
37.3497	1343.4	51.2517	1240.1	77.0522	2378.16
45.4386	1344.66	55.0984	1240.45	79.1947	2379.84
51.6702	1345.81	53.488	1240.54	66.9124	2386.24
64.891	1350.04	54.3272	1244.23	58.9725	2386.82
38.9034	1352.44	53.1536	1246.16	61.3692	2388.3
43.2636	1356.09	51.1815	1249.99	66.9146	2392.21
50.5605	1358.02	57.8131	1252.4	72.4511	2398.12
54.4925	1360.58	64.3711	1253.45	68.2166	2398.98
52.6354	1360.62	50.1561	1254.46	53.5041	2405.25
53.9277	1362.3	44.5051	1260.81	53.1827	2409.84
53.8251	1362.94	88.6315	1263.9	61.6876	2414.01
48.9962	1367.53	57.842	1263.99	41.5936	2416.8
30.9853	1369.14	60.4411	1271.35	70.0254	2418.56
51.4682	1380.11	52.8989	1272.09	72.8758	2428.97
46.8949	1388.36	47.3198	1275.85	55.2383	2430.68
52.9718	1398.75	46.209	1275.89	46.6218	2432.03
52.6272	1401.06	56.3622	1276.07	68.2292	2432.46
47.5868	1408.04	44.4903	1278.99	49.0841	2434.46
44.8883	1410.6	55.4791	1281.12	40.19	2434.62
64.4504	1414.68	41.8143	1291.83	60.8236	2436.91
46.0939	1420.77	50.8564	1300.16	41.8046	2438.65
57.2444	1422.53	59.405	1311.38	54.6337	2443
60.2129	1423.02	48.3485	1312.67	46.3282	2443.6
62.4437	1428.14	48.7039	1313.34	62.2531	2446.11
36.271	1431.64	53.6643	1314.05	74.3236	2447.87
56.8511	1436.88	63.2645	1315.63	85.2278	2451.97
40.8107	1444.21	63.9413	1317.85	62.5682	2463.72
60.4345	1449.03	68.9539	1318.24	50.3665	2471.99
49.8154	1456.32	50.8406	1319.39	65.3048	2472.03
57.8665	1456.87	65.9985	1324.78	61.006	2485.15
56.4837	1457.11	42.6936	1325.89	65.688	2491.18
37.0398	1459.91	43.2657	1326.72	65.2365	2495.84
55.3902	1469.33	49.9607	1330.46	64.8191	2501.95
69.097	1472.81	57.0384	1333.31	70.917	2503.08
46.9352	1478.08	42.2482	1333.59	79.4965	2503.55
59.5539	1485.69	43.2957	1335.03	79.602	2519.53
42.9288	1496.24	58.0516	1335.4	64.5505	2535.63
39.8306	1499.44	55.513	1339.03	48.7364	2540.91
53.9215	1502.04	59.971	1339.84	62.922	2544.03
47.678	1506.7	48.8518	1347.3	104.396	2550.73
61.6263	1516.25	49.3177	1349.12	56.1331	2554.9
69.8703	1518.4	57.8319	1350.31	57.4415	2556.68
41.1266	1523.08	107.731	1350.43	87.3574	2558.3
40.3069	1524.93	36.2919	1351.6	57.7326	2560.83
37.0414	1535.48	48.1559	1356.76	72.6974	2571.39
56.0448	1539.23	50.8854	1357.03	66.1195	2577.8
62.6054	1542.63	46.6302	1358.23	55.4836	2578.73
70.5344	1548.35	45.7638	1370.36	36.1923	2580.78
47.9008	1549.41	56.7042	1374.81	65.167	2581.37
52.6893	1562.5	66.0213	1374.83	51.0666	2586.56
61.5923	1574.44	65.4567	1376.97	80.3958	2590.68
56.1834	1580.24	72.9736	1377.01	64.9378	2591.97
60.4156	1583.12	72.9736	1377.01	74.4891	2593.35
34.16	1583.59	32.0958	1383.09	50.1759	2598.37
56.0475	1584.59	63.1019	1388.92	79.0194	2601.68
54.5827	1585.85	57.8268	1389.46	46.0019	2602.56
46.7206	1590.35	62.331	1393.9	44.8791	2610.12
40.1767	1593.75	50.0076	1394.19	52.1674	2614.05
69.2249	1596.06	66.7289	1399.72	87.9696	2622.87
44.5771	1602.11	62.9785	1400.3	66.5658	2623.08
43.9706	1605.07	42.6621	1405.82	61.645	2631.47
63.3626	1615.95	55.6548	1409.66	76.6125	2639.19
55.8659	1620.41	51.247	1415.56	51.9681	2639.5
39.328	1626.95	64.7658	1423.01	72.5559	2641.64
46.8471	1630.46	77.5836	1425.26	70.7451	2646.24
51.1143	1635.68	71.1916	1432.72	80.7091	2651.56
64.6535	1644.02	60.7399	1432.79	47.5649	2655.66
49.7847	1648.07	54.452	1443.94	70.2113	2656.46
44.1665	1666.82	63.3587	1446.05	67.9803	2658.17
49.5073	1667.18	68.4221	1449.14	58.5995	2660.91
48.4066	1669.15	60.2261	1462.01	68.4338	2663.61
45.6636	1670.67	64.9936	1463.61	66.7757	2663.67
57.9679	1687.44	59.2778	1471.24	62.1001	2663.78
36.6146	1687.85	75.1106	1471.59	48.9769	2667.17
68.3337	1694.85	53.1047	1472.26	58.2734	2668.21
49.3842	1694.92	59.5828	1473.2	43.8104	2669.17
48.1025	1697.48	39.3101	1474.4	57.0486	2669.58
61.3834	1698.69	56.8492	1475.4	64.8815	2672.78
66.9698	1706.91	76.4775	1476.88	63.6177	2676.29
57.1521	1711.87	49.355	1477.38	79.892	2681.29
46.3099	1720.23	47.5382	1477.41	44.9253	2683.07
58.5433	1722.55	47.715	1478.35	63.3861	2686.93
61.1809	1724.68	48.0241	1483.14	80.5041	2702.81
44.9229	1726.89	40.5108	1484.74	66.8	2704.54
52.0154	1739.16	52.2699	1484.86	75.2278	2710.9
35.2542	1739.94	45.3922	1488.99	79.2635	2714.87
54.8244	1740.16	57.5761	1507.19	78.6421	2717.76
63.1016	1744.23	55.632	1521.7	82.5108	2718.02
61.5818	1761.67	55.6765	1526.32	57.8708	2724.45
44.5808	1764.44	52.7662	1527.13	62.4232	2725.71
62.0556	1765.47	87.2013	1529.85	79.8412	2728.35
56.3365	1766.87	135.981	1533.05	45.6594	2730.1
61.2355	1777.81	40.8986	1545.93	62.446	2731.53
52.4676	1791.39	48.5152	1547.97	46.2128	2735.21
40.7042	1797.8	68.4867	1549.37	53.7362	2740.8
43.8216	1797.83	75.8498	1549.64	70.3592	2756.93
49.9345	1799.64	84.9341	1553.57	68.9155	2757.09
52.3305	1809.87	50.4256	1558.06	47.2197	2778.31
59.0217	1810.92	60.7894	1566.13	63.6698	2780.15
58.8004	1817.9	44.1132	1566.36	82.5441	2786.41
56.1691	1820.1	49.2591	1568.95	50.121	2787.56
50.53	1821.32	53.9585	1576.33	52.2392	2818.45
51.1651	1834.74	53.3824	1587	64.9373	2819.03
58.374	1866.67	53.8105	1587.16	73.9751	2823.98
44.3303	1885.8	68.6081	1593.69	62.3262	2828.3
62.9734	1894.92	64.4824	1595.87	66.9079	2830.62
60.1029	1906.08	68.8815	1598.55	118.534	2832.08
44.1508	1912.27	29.7229	1598.57	57.0302	2839.41
54.1294	1914.94	51.5998	1599.11	53.713	2841.02
69.3995	1924.06	41.7824	1600.63	75.6859	2845.48
49.8933	1932.47	37.9463	1602.2	67.7767	2849.42
49.6739	1945.87	69.8258	1603.49	64.9646	2863.12
64.0364	1949.23	68.7267	1604.71	77.2636	2863.94
68.6119	1961.73	59.215	1605.39	55.5493	2864.14
43.6345	1965.2	68.0867	1607.98	71.9019	2873.75
42.2555	1968.05	47.9434	1612.01	56.2807	2874.11
54.4366	1974.52	66.5005	1612.92	34.6373	2875.03
47.1044	1980.01	62.9253	1627.66	43.0751	2878.15
52.4396	1998.89	62.0362	1627.7	56.6559	2882.38
63.2367	2001.74	56.1425	1632.98	50.0145	2889.44
52.6733	2003.2	51.0118	1637.22	50.5246	2903.01
73.6074	2021.11	54.6107	1642.94	79.6891	2909.47
67.5198	2030.13	56.7382	1650.14	43.4704	2919.16
57.2143	2031.47	76.3162	1650.62	93.4349	2921.64
50.4847	2039.57	37.5328	1653.93	81.9508	2929.8
39.1057	2048.06	52.3908	1655.98	58.8331	2947.06
60.6079	2050.29	55.2699	1663.88	67.3656	2960.02
58.9525	2056.34	65.146	1665.83	47.4131	2967.69
68.2773	2060.57	54.4513	1677.63	69.8811	2970.42
71.8862	2063.31	48.458	1684.23	42.7956	2976.43
59.0906	2065.17	67.2201	1685.07	57.2146	3004.79
66.4542	2077.78	51.8409	1702.3	53.457	3020.29
58.0694	2078.64	65.0846	1708.21	80.3403	3061.44
43.38	2080.16	53.3311	1721.95	60.3424	3061.95
34.6909	2080.66	58.233	1722.18	63.6659	3063.26
64.398	2083.81	81.2177	1734.76	89.9373	3064.01
56.1054	2101.19	62.2407	1743.2	93.1853	3089.87
54.9366	2104.64	65.1573	1748.73	66.6231	3095.35
66.7002	2111.36	49.7544	1749.12	73.2921	3134.11
46.8514	2114.26	42.189	1750.4	72.0099	3135.43
56.9521	2120.85	72.6114	1751.94	65.3627	3136.92
49.5482	2124.79	64.885	1754.68	75.9005	3141.45
70.5105	2130.23	49.197	1757.27	54.8493	3152.48
67.3389	2145.66	57.6204	1763.07	52.7489	3152.56
59.66	2147.48	69.1302	1772.42	48.0218	3162.12
45.0598	2149.46	80.8692	1772.98	70.3787	3162.86
66.2721	2151.39	41.9161	1795.95	66.941	3168.26
58.2323	2154.49	59	1797.57	51.4505	3203.37
36.7271	2156.73	88.1353	1797.77	65.5166	3203.65
38.7951	2157.6	40.0182	1799.37	63.9939	3216.44
49.2415	2160.15	54.7816	1806.73	59.3166	3223.04
46.1365	2170.75	50.5378	1817.54	63.5789	3230.5
48.6792	2175.77	71.369	1818.52	72.4253	3234.76
52.2233	2185.75	65.4464	1840.18	76.3589	3244.73
49.2301	2191.22	60.8458	1847.88	59.923	3262.79
56.4694	2197.82	62.105	1849.57	68.9336	3267.16
53.3501	2208	60.4033	1855.66	74.2161	3281.93
43.407	2209.01	70.2785	1859.58	54.0477	3290.17
69.5548	2228.39	53.402	1864.22	72.8524	3291.4
57.0171	2230.92	103.13	1867.8	66.9668	3294.63
67.3617	2232.09	77.0563	1870.09	81.1152	3301.96
54.7724	2233.17	83.2898	1872.46	60.5365	3305.11
37.5392	2236.58	60.9246	1873.41	64.3186	3311.45
53.6352	2245.09	83.9959	1878.48	66.5803	3322.64
67.4649	2245.22	68.7218	1887.16	64.8382	3325.56
71.5708	2245.4	61.6809	1889.3	71.1752	3328.81
63.031	2249.97	67.2951	1894.46	72.2281	3339.99
65.0784	2259.92	60.8389	1909.36	65.3966	3342.21
61.2687	2271.01	85.4109	1912.86	67.8342	3347.08
66.3463	2274.12	66.9687	1915.05	60.0794	3364.72
60.744	2274.15	46.4082	1924.38	80.6543	3368.47
47.7682	2278.37	79.6194	1926.53	63.5851	3375.07
77.961	2312.17	48.258	1939.83	65.9214	3381.36
50.1684	2315.62	56.7907	1941.2	56.3998	3384.85
58.9743	2322.31	49.1809	1944.58	68.8632	3401.44
50.2952	2324.29	46.9091	1955.2	71.878	3405.43
62.4212	2344.15	51.6966	1957.29	49.7914	3425.14
45.5362	2347.6	76.2906	1967.77	75.9908	3428.01
64.6691	2351.23	72.2731	1974.01	56.5205	3433.08
64.6371	2356.37	59.3517	1974.31	59.2446	3433.67
44.3631	2364.2	53.6195	1977.27	77.8579	3437.01
58.9837	2380.76	61.1718	1977.83	48.472	3444.07
61.2972	2383.12	48.4656	1996.73	68.2103	3444.35
49.3242	2384.54	45.4497	1999.77	44.5564	3452
43.4558	2386.88	51.0409	1999.85	46.5551	3459.73
45.1056	2392.27	55.679	2000.58	70.8637	3460.15
45.1592	2402.54	59.1741	2011.91	58.4088	3465.45
53.2598	2408.8	58.9927	2032.5	93.7215	3467.86
61.1612	2424.12	56.1908	2032.69	59.4161	3470.66
60.6557	2426.21	91.5559	2033.56	58.7383	3476.27
62.6073	2466.78	70.088	2033.95	59.5427	3490.99
71.843	2488.09	50.7705	2036.22	51.3899	3495.29
69.8059	2499.57	65.165	2038.9	60.1979	3496.11
70.1701	2515.09	72.257	2048.38	69.0753	3497.7
61.0552	2516.02	54.5087	2054.36	62.0804	3531.57
59.7912	2524.96	73.4443	2083.56	60.6741	3541.34
57.6573	2530.44	61.9612	2092.9	57.636	3570.02
59.4847	2544.66	59.2736	2102.2	72.9825	3573.63
57.5232	2546.38	43.2494	2109.69	52.2007	3580.37
63.1936	2557.89	58.9246	2120.1	59.0609	3591.75
46.9991	2563.63	75.4246	2122.29	60.5346	3598.01
50.8853	2566.61	48.8642	2126.5	68.577	3607.32
83.4363	2589.96	44.1693	2137.73	64.9047	3613.92
49.6639	2595.68	124.605	2173.03	63.2498	3626.63
46.1266	2605.92	96.4106	2196.1	66.9113	3634.28
62.274	2607.41	59.7277	2202.83	49.3232	3652.64
64.5069	2613.25	76.1022	2219.56	80.6497	3655.11
57.8054	2616.33	53.836	2220.26	83.162	3656.68
53.8242	2616.9	56.6699	2220.7	56.4734	3674.09
54.3552	2619.03	59.9602	2221.58	70.3496	3676.52
55.8895	2622.15	56.9657	2222.89	60.5121	3714.54
44.8887	2624.09	78.8157	2232.92	37.3053	3727.63
41.7123	2629.68	83.8989	2259.44	54.7689	3727.79
43.4729	2631.32	58.0616	2268.13	58.2501	3733.42
53.3421	2653.89	59.7317	2273.48	50.0084	3734.69
58.4587	2657.66	59.1036	2278.15	80.6676	3740.92
65.2346	2677.45	72.1752	2284.14	56.609	3741.41
59.9101	2679.29	56.0815	2299.75	73.4238	3742.93
55.5971	2689.01	50.7618	2306.62	55.7626	3745.64
75.5548	2707.94	55.1308	2318.5	98.752	3755.31
79.3187	2715.74	60.6253	2328.53	57.2518	3756.34
69.6805	2720.1	65.1876	2340.78	61.6337	3761.59
56.4552	2723.39	67.9779	2349	66.4719	3766.98
64.8174	2753.9	72.0046	2350.76	78.7434	3769.08
66.2027	2756.39	67.8194	2361.81	54.6284	3776.25
51.4931	2763.01	69.559	2398.82	58.7329	3778.26
45.3605	2779.5	75.3438	2401.26	76.6285	3784.72
66.4738	2781.85	77.0514	2419.49	47.6444	3789.46
53.7186	2786.21	60.5294	2453.97	68.5465	3792.48
54.57	2793.31	66.9619	2463.53	72.7821	3798.68
63.1785	2822.3	59.9668	2508.24	50.6891	3804.27
55.7567	2832.51	71.5243	2510.34	81.0601	3805.03
48.1059	2839.45	63.6	2521.59	56.8548	3814.73
75.6471	2847.98	61.149	2528.71	96.2703	3824.03
52.602	2850.49	42.7572	2544.36	47.0861	3872.75
67.7015	2883.34	91.5602	2545.96	75.2453	3873.48
55.0677	2891.86	62.7746	2551.21	49.1423	3891
61.3069	2912.66	174.65	2552.6	55.5645	3903.75
64.322	2913.11	77.4422	2552.73	72.5793	3905.59
65.1593	2921.63	60.3738	2575.06	71.7485	3914.25
69.7353	2923.28	93.8681	2578.3	45.7046	3917.5
47.2601	2927.38	60.577	2608.15	54.8022	3949.04
60.2144	2934.9	55.049	2615.26	56.206	3950.68
65.2997	2935.27	88.8034	2621.37	48.6519	3975.08
64.2563	2938.01	73.7471	2622.45	60.7693	3975.85
54.1817	2955.31	79.8409	2627.67	47.2664	3993.43
54.8876	2972.65	64.2059	2637.14	73.7443	4011.27
58.7283	2984.19	60.0196	2643.03	67.8855	4016.99
55.187	2984.95	50.2615	2654.04	74.6854	4047.45
66.7775	2986.41	66.1757	2656.75	86.1387	4049.5
67.051	2988.21	59.8553	2670.43	70.0521	4055
53.5344	2994.22	60.671	2704.89	77.4053	4058.25
65.2211	2998.87	50.1735	2713.21	67.6245	4076.77
59.0795	3002.99	59.2784	2725.71	80.9549	4081.39
79.539	3010.86	73.9111	2743.08	86.1792	4086.46
49.3149	3011.52	74.1686	2773.3	65.2976	4102.61
66.8471	3012.24	95.8771	2806.08	60.0511	4109.91
44.4684	3018.97	59.2524	2806.81	44.2916	4111.94
70.1181	3035.44	85.664	2811.21	60.5441	4133.83
58.3924	3037.6	60.8667	2811.24	72.2586	4135.31
78.9524	3046.49	84.2274	2817.04	75.0174	4152.43
61.9734	3050.43	160.549	2820.63	66.2961	4159.35
60.7561	3055.9	64.2754	2830.86	77.2297	4160.68
64.8801	3066.83	77.8082	2835.26	59.5861	4178.45
56.0215	3073.4	66.7251	2836.5	72.6747	4181.73
66.4794	3084.74	54.2889	2850.72	71.7304	4190.56
65.8283	3085.03	62.2918	2851.36	83.615	4197.14
67.4356	3089.58	47.7537	2852.62	64.8138	4203.14
76.2971	3095.24	37.5084	2853.43	66.5946	4203.16
62.9569	3101.56	56.3915	2874.12	60.6819	4207.47
48.1937	3102.21	111.455	2875.2	51.8029	4223.63
91.7218	3117.25	86.7212	2920.14	73.8919	4225.43
43.4907	3117.61	86.718	2924.96	83.0884	4268.19
76.6885	3130.71	69.2499	2928.65	80.1601	4273.39
51.1031	3131.11	54.9065	2932.41	46.2011	4277.3
50.0712	3132.56	94.7239	2967.21	56.5078	4280.18
56.4052	3133.56	73.1171	2967.67	57.6338	4280.37
70.365	3138.04	52.6389	3010.81	48.3053	4281.57
52.3733	3153.86	59.3361	3028.87	65.7089	4293.24
51.0969	3169.84	77.7293	3034.6	91.0466	4318.32
52.8326	3177.24	59.6713	3041.8	59.0799	4326.83
58.7763	3177.74	81.7923	3044.25	77.2152	4327.77
65.9683	3205.38	143.878	3058.47	70.5733	4328.3
65.3681	3207.29	110.538	3059.16	60.2481	4337.9
60.7368	3212.84	87.1721	3061.32	72.9051	4350.97
43.9209	3217.53	69.6786	3062.83	70.4365	4373.17
55.5203	3218.09	111.561	3069.53	78.8996	4378.53
69.9386	3233.04	91.0687	3073.21	61.8881	4392.75
70.2077	3235	60.4032	3073.29	64.5605	4421.09
70.3918	3238.24	42.4429	3083.83	63.0188	4425.54
65.7371	3240.93	60.2781	3092.28	71.145	4425.55
54.0448	3254.94	57.2134	3100.04	63.983	4431.68
62.0115	3269.35	67.3302	3116.13	72.431	4433.77
72.5721	3278.35	43.4993	3180.77	55.9633	4441.61
75.6432	3284.31	57.5951	3185.4	61.9036	4443.24
63.619	3290.05	74.6955	3185.96	45.2962	4448.35
70.6149	3290.57	69.1265	3188.06	65.3763	4469.62
53.364	3291.66	61.7574	3199.4	88.3004	4483.43
67.8188	3315.7	74.6684	3207.47	52.4054	4536.18
58.0456	3319.5	84.868	3208.17	79.8757	4555.13
64.7451	3333.55	95.8099	3208.79	67.0802	4574.98
60.1162	3336.7	68.5908	3212.17	68.4289	4582.85
53.0206	3353.94	76.5557	3269.42	57.6942	4593.75
50.515	3378.42	61.0323	3282.83	61.8759	4595.93
58.1002	3379.13	60.9759	3339.63	48.701	4596.31
63.0883	3390.22	71.5695	3363.93	84.5373	4616.29
69.0491	3395.15	58.6691	3377.75	55.7292	4622.91
76.737	3408.51	68.4031	3381.48	72.3302	4635.05
69.5615	3420.5	80.528	3392.19	53.026	4644.4
48.8158	3424.71	76.6535	3393.82	60.7595	4654.93
59.0621	3453.72	68.702	3396.64	60.0968	4660.37
69.1692	3462.82	115.909	3408.79	56.078	4676.42
61.5915	3468.46	47.9064	3411.53	73.5219	4694.42
52.4739	3473.51	64.1367	3415.67	52.9904	4710.35
51.605	3487.89	110.778	3419.87	62.7459	4714.09
55.4391	3501.41	88.0887	3425.89	80.4147	4746.6
67.8773	3511.14	100.121	3427.12	62.735	4748.05
76.7975	3515.47	78.6685	3429.12	77.0398	4783.64
59.9152	3536.76	59.5413	3443.47	46.3772	4809.63
70.8164	3542.6	103.744	3448.7	77.8305	4818.45
56.5123	3549.3	72.4657	3470.03	78.105	4867.18
61.25	3558.92	65.2711	3478.81	53.1931	4872.98
56.0825	3570.84	84.4609	3489.11	80.4939	4874.48
59.6046	3573.64	73.0321	3501.7	70.7604	4878.36
56.1621	3587.26	73.5646	3505.13	61.3065	4909.55
48.2735	3698.47	80.4704	3510.48	55.7865	4913.36
70.5612	3707.65	66.5653	3511.64	73.023	4926.31
60.1467	3741.76	50.5185	3521.08	96.9954	4930.93
64.4107	3746.29	58.9019	3524.91	84.3663	4935.95
73.8945	3749.61	87.0292	3528.82	77.1114	4996.19
58.0219	3792.91	57.9636	3542.83	78.2355	5000.09
56.169	3819.44	53.4962	3565.5	70.3185	5014.16
73.6918	3821.89	60.165	3581	62.5054	5044.72
66.9828	3823.14	59.0107	3589.11	76.3224	5067.09
61.7015	3865.57	58.494	3599.11	68.4215	5129.98
42.4418	3875.66	57.3787	3627.7	83.8035	5145.45
65.2207	3884.03	77.4583	3638.95	72.31	5216.01
56.4451	3894.88	62.0112	3641.37	105.892	5373.8
64.0628	3911.05	70.9707	3652.46	101.31	5380.07
70.8688	3922.08	59.441	3652.61	113.741	5396.05
85.883	3962.4	49.8021	3658.3	66.4318	5404.31
74.7235	3969.89	71.285	3663.97	58.1029	5442.85
66.9129	3978.16	79.6159	3673.96	102.833	5484.25
60.002	3980.07	58.5626	3685.34	65.0441	5566.67
71.2198	4087.29	90.3629	3687.53	68.7065	5576.87
51.0332	4111.63	84.9373	3709.67	60.8004	5576.97
64.9514	4117.22	52.7629	3712.75	67.6803	5606.62
42.8254	4149.55	82.2642	3721.33	56.8128	5606.95
64.3576	4155.14	73.7519	3722.62	64.794	5612.44
60.2089	4158.73	68.195	3729.42	66.7207	5688.7
50.6718	4160.82	53.5402	3751.83	72.6317	5754.59
57.18	4162.32	67.9685	3755.83	81.6724	6145.15
53.6995	4165.92	57.625	3767.37	85.9717	6187.37
63.5983	4183.79	124.221	3767.57	76.6557	6195.63
78.4876	4241.34	76.3414	3782.24	63.111	6217.85
69.3422	4303.59	62.4254	3810.51	62.8781	6233.93
51.8464	4314.68	138.093	3821.86	82.6795	6293.68
71.2185	4342.11	63.9037	3826.06	74.3555	6320.11
62.7138	4352.17	77.1957	3839.24	54.7402	6347.75
68.3112	4361.5	64.85	3845.08	79.6128	6519.66
86.3239	4361.77	66.8872	3845.94	93.0858	6547.38
57.9443	4387.58	60.103	3862.99	69.3696	6579.65
86.3542	4425.55	76.6048	3878.39	71.2552	6745.64
60.4778	4444.04	130.66	3883.95	70.5558	7054.25
48.2738	4490.72	73.1626	3895.35	72.542	7426.17
77.3901	4535.27	65.8245	3908.55	83.8546	7580.89
55.1698	4540.94	61.0863	3912.38	66.7011	7623.23
65.5469	4544.04	53.2231	3940.96	72.8131	7945.34
56.4734	4550.87	63.637	3954.14	68.5005	7958.69
60.6237	4554.43	114.426	3967.49	59.3458	8548.34
59.8349	4575.2	68.0279	3968.77
71.9022	4599.18	49.1873	3973.99
73.1993	4644.9	71.0007	3993.5
87.2713	4654.85	79.0499	4031.98
92.8589	4658.02	55.8267	4037.43
72.6164	4704.3	62.1491	4044.48
42.7116	4719.39	88.1754	4058.65
66.923	4778.41	78.1802	4062.15
55.2155	4813.83	59.2671	4066.68
58.831	4911.41	84.4079	4080.78
72.0037	4997.23	84.9782	4105.7
76.2092	5039.95	130.109	4117.35
69.3583	5065.07	74.0342	4128.31
82.7408	5067.81	83.1999	4149.13
72.5183	5090.81	72.6662	4178.29
72.6769	5117.41	63.7466	4189.52
69.0757	5294.04	53.9896	4200.5
70.7073	5355.72	79.2115	4207.16
71.1662	5387.41	128.641	4208.2
55.7882	5488.32	113.256	4228.85
80.7175	5499.47	95.9846	4285.12
64.0329	5552.34	59.8982	4286.48
50.8085	5588.66	78.7257	4292.89
71.8471	5668.61	53.5038	4305.89
62.5222	5715.49	67.9308	4312.69
57.8738	5763.99	102.125	4314.94
66.0827	5787.72	123.12	4321.32
61.5557	5814.82	63.3395	4334.07
63.988	5828.67	83.0889	4348.84
54.4359	5849.36	76.3404	4349
73.6976	5863.6	74.4557	4354.32
60.3144	5953.9	68.376	4372.59
69.5286	6008.03	54.8521	4373.77
74.2677	6140.34	70.0422	4387.91
65.1146	6327	69.7854	4391.57
46.0667	6450.1	84.3439	4396.89
68.6204	6495.59	69.0872	4398.84
60.0643	6556.37	70.9358	4407.02
91.4267	6741.1	55.46	4429.18
56.9739	6783.26	95.1396	4438.79
79.3116	6954.74	50.0011	4461.99
52.3857	7146.79	75.3634	4464.86
68.7665	7504.3	44.8807	4474.08
54.4634	7819.75	72.0636	4521.53
70.427	8199.18	61.5478	4521.65
62.8673	8945.15	59.0931	4538.98
58.7261	9088.65	79.4235	4573.66
75.3283	9228.57	74.0174	4575.74
65.1266	10025.2	109.076	4578.9
102.035	12359.7	63.1762	4579.87
		79.9191	4591.25
		53.3089	4596.63
		74.5601	4614.23
		66.3402	4614.4
		55.3534	4614.87
		55.3594	4624.18
		76.5595	4625.17
		71.911	4639.33
		65.0332	4647.54
		74.713	4648.44
		87.3327	4675.97
		61.2086	4697.78
		83.5877	4700.61
		86.9487	4708.68
		62.699	4737.71
		48.9273	4738.62
		62.1648	4739.87
		64.7934	4748.2
		101.86	4752.17
		59.212	4764.86
		83.0523	4767.78
		77.667	4800.83
		74.3617	4801.58
		81.102	4808.77
		67.2991	4826.61
		84.0144	4864.39
		71.6237	4865.11
		63.2162	4867.29
		95.0888	4870.97
		52.9551	4880.06
		55.4927	4886.78
		70.941	4893.32
		92.7707	4906.12
		85.9854	4929.63
		96.181	4929.74
		111.425	4932.56
		135.545	4943.45
		74.152	4958.31
		46.4525	4960.6
		53.6707	4965.2
		65.6919	4976.67
		77.865	5021.47
		76.781	5034.01
		100.542	5042.86
		49.1945	5047.23
		113.705	5059.93
		69.3381	5072.87
		83.5173	5075.66
		86.0389	5088.02
		47.7056	5097.19
		57.0688	5123.56
		114.082	5127.3
		127.045	5127.77
		97.3898	5147.43
		65.3667	5161.5
		94.5576	5177.27
		73.0547	5184.77
		64.9383	5187.65
		88.1633	5222.64
		69.2518	5237.46
		54.101	5239.56
		55.4086	5272.88
		78.225	5316.17
		57.9534	5347.49
		72.4266	5348.85
		77.1554	5355.84
		77.6933	5361.52
		78.1139	5370.65
		55.4785	5383.19
		62.2682	5400.89
		75.0035	5415.58
		112.722	5418.21
		116.19	5424.26
		79.4904	5427.36
		54.3618	5433.65
		50.1742	5446.55
		74.9012	5454.19
		70.9422	5456.78
		40.7717	5485.13
		88.4392	5491.75
		61.7709	5500.9
		69.1228	5504.34
		74.1732	5508.33
		57.4847	5520.82
		86.3385	5569.69
		51.912	5588.78
		71.023	5605.32
		65.696	5608.98
		53.0214	5627.36
		66.1118	5628.3
		67.8003	5641.76
		132.653	5652.87
		67.2277	5667.93
		68.9525	5669.98
		136.459	5686.65
		61.9268	5689.49
		51.9619	5700.79
		73.605	5707.65
		73.7358	5710.96
		58.5826	5779.41
		101.682	5782.27
		78.1451	5803.35
		65.1642	5819.3
		47.6763	5821.51
		70.6829	5858.19
		58.3829	5870.02
		74.9317	5892.13
		82.341	5893.13
		50.2337	5917.22
		72.6408	5918.22
		64.3506	5926.62
		78.9995	5936.46
		51.6454	5970.57
		66.1427	5982.71
		54.3803	5983.57
		112.958	5983.96
		63.8782	5991.92
		67.9024	6002.22
		63.0327	6007.99
		75.672	6064.94
		53.84	6078.8
		62.1742	6080.2
		93.1351	6084.32
		66.6894	6103.16
		70.0583	6115.94
		83.4697	6137.9
		80.8966	6140.29
		75.6899	6164.25
		77.488	6169.2
		87.1343	6188.9
		91.3497	6203.04
		83.8016	6220.71
		51.1121	6246.67
		66.2533	6250.26
		74.7535	6260.39
		101.171	6275.04
		78.4241	6278.85
		71.3647	6280.42
		70.9806	6332.43
		65.7749	6351.36
		71.6155	6353.15
		65.8317	6361.36
		63.6736	6379.87
		66.5451	6389.28
		83.8273	6475.01
		99.1668	6476.37
		101.519	6495.66
		106.684	6498.94
		63.9424	6548.8
		64.1896	6549.39
		72.7302	6580.96
		62.6032	6591.72
		64.4098	6605.63
		87.2947	6650.33
		77.1628	6676.58
		61.9322	6689.57
		69.2609	6717.96
		80.1592	6740.39
		111.154	6749.71
		84.3443	6752.79
		106.93	6785.08
		89.7454	6792.44
		53.9196	6825.6
		73.5483	6827.37
		106.26	6862.98
		84.6276	6899.67
		85.0099	6901.34
		70.5958	6908.52
		81.8761	6908.88
		78.2197	6918.06
		69.4256	6965.89
		74.6319	6987.8
		91.2789	7006.24
		96.4268	7022.67
		64.7318	7031.34
		77.5315	7036.1
		80.1486	7045.63
		73.0797	7084.37
		98.4879	7129.31
		109.021	7138.87
		71.2338	7148.23
		80.2326	7183.62
		58.6115	7186.7
		60.7502	7188.59
		93.1111	7191.27
		94.2022	7204.84
		72.1322	7207.28
		72.3819	7260.14
		73.3656	7299.42
		76.0366	7325.67
		65.9563	7335.01
		57.7183	7350.2
		133.372	7360.6
		104.049	7376.61
		96.3286	7422.08
		71.8774	7466.62
		85.7565	7495.31
		80.6002	7499.01
		90.0448	7542.07
		90.3266	7558.01
		60.2164	7568.48
		74.3168	7610.24
		74.8127	7614.11
		64.0623	7618.4
		67.3559	7637.74
		81.1474	7648.16
		90.9977	7671.87
		77.3053	7677.21
		87.0688	7692.64
		62.0124	7714.87
		61.8109	7722.64
		69.5299	7729.46
		117.347	7751.56
		70.089	7775.95
		69.2031	7810.47
		78.0497	7828.49
		81.4804	7885.58
		67.5583	7888.01
		80.5481	7888.74
		68.4121	7896.62
		82.2271	7911.37
		50.2573	7925.92
		75.2616	7937.48
		101.634	7938.46
		76.0815	7984.99
		78.2485	7995.42
		112.709	8012.24
		97.2476	8078.41
		56.177	8088.89
		107.746	8090.12
		84.0531	8113.56
		64.5377	8141.31
		96.8534	8242.41
		80.7094	8294.39
		79.8454	8328.67
		74.6938	8334.97
		71.0949	8396.17
		64.1529	8399.49
		74.6493	8428.68
		103.074	8429.08
		86.7411	8572.55
		92.6423	8575.91
		95.685	8640.97
		53.9195	8676.82
		69.7766	8708.07
		96.1828	8831.09
		107.791	8835.98
		59.262	8883.52
		125.402	8894.63
		74.2241	8900.67
		78.2242	8919.16
		49.3933	8929.58
		68.2847	8948.85
		68.5066	8987.3
		74.9218	9012.75
		67.1333	9033.24
		70.0714	9047.1
		81.66	9098.9
		84.4304	9184.02
		63.4214	9233.39
		61.8281	9250.63
		45.4822	9307.01
		105.04	9315.86
		67.049	9379.57
		85.3001	9380.74
		65.7032	9403.34
		89.8443	9427.21
		101.384	9440.68
		60.1392	9462.32
		66.0824	9469.38
		63.6461	9584.93
		86.0722	9638.53
		74.8526	9688.91
		46.457	9721.47
		75.9433	9734.61
		82.6174	9754.18
		103.429	9811.26
		76.302	9846.42
		72.6738	9852.64
		59.7825	9854.39
		68.1063	9878.37
		108.145	9919.53
		75.1552	9937.78
		81.3451	9940.11
		65.7959	9974.57
		105.145	9994.25
		76.3505	10017.3
		56.7845	10057.3
		68.5017	10105.3
		60.0304	10171.2
		79.035	10243.4
		64.7912	10285.9
		66.589	10294.7
		71.3485	10302.8
		72.4544	10352.3
		59.8893	10435.6
		97.0304	10491.8
		64.5706	10546
		54.7262	10645.3
		91.048	10649.6
		62.9454	10755.6
		63.733	10778
		88.5119	10787.9
		88.3284	10797.4
		80.3818	10845.3
		65.7192	10991.4
		60.5169	11089.7
		62.407	11096
		72.292	11130.2
		86.1921	11228.7
		70.5508	11263.7
		56.3039	11303.3
		65.1601	11323.6
		132.444	11345.8
		57.6816	11382.5
		97.3525	11488.4
		62.4939	11531.2
		92.3246	11557.5
		101.69	11733
		79.6353	11791.7
		60.1138	11885.2
		95.9144	11945.1
		74.0887	12151.7
		81.911	12400.8
		67.5889	12487.9
		97.1716	12614.8
		61.9482	12802.5
		89.2032	13143.9
		67.1278	13595.6
		105.977	13787.7
		87.8291	13833.2
		70.4531	13856.8
		79.499	13958.9
		70.4775	14021.6
		58.135	14041.5
		99.8333	14067.1
		74.119	14148.3
		71.1434	14260.6
		69.5777	14314.5
		81.0108	14458.3
		111.448	14654.3
		86.8303	15041.9
		61.6269	15209.3
		97.8852	15373.4
		74.3423	15629.8
		96.831	15796.9
		88.3952	15801.4
		61.3665	15985.3
		60.1741	16269.9
		65.0068	16778.9
		57.0823	16810.2
		78.4195	17694
		73.5568	18398.2
		89.7998	18741.6
		67.0928	19082.6
		108.928	19869.4
		73.4825	22670.3
		108.833	22715.5
		66.9169	24041
		64.4028	24387.4
		83.5253	25581.6
