# Supplementary material for: N501Y mutation of spike protein in SARS-CoV-2 strengthens its binding to receptor ACE2
Source: eLife. 2021 Aug 20;10:e69091. doi: 10.7554/eLife.69091 (PMC8455130; doi:10.7554/eLife.69091)
Supplement: Figure 3—source data 5. [file elife-69091-fig3-data5.xlsx]

## Sheet: Sheet1
Summary of the spring constant (k) of all fifteen cantilevers
Velocity (µm/s)	RBD (pN·nm-1)	RBDN501Y (pN·nm-1)	RBDTriple (pN·nm-1)
0.5	33.9/30.3/34.2	32.4/31.5	32.8/35.4
1	36.3/34.2/31.9	31.5/35.6	33.0/35.4
3	30.3/36.3/33.9	35.6	35.4
5	30.3/33.9	31.8/31.5/37.5	32.8/35.4/31.9
10	30.3/31.9/29.4	32.4/31.8/37.5	31.9/35.4/33.0
