# Supplementary material for: N501Y mutation of spike protein in SARS-CoV-2 strengthens its binding to receptor ACE2
Source: eLife. 2021 Aug 20;10:e69091. doi: 10.7554/eLife.69091 (PMC8455130; doi:10.7554/eLife.69091)
Supplement: Figure 4—source data 1. [file elife-69091-fig4-data1.xlsx]

## Sheet: Sheet1
Rupture forces from 20 times SMD simulation
RBD (pN)	RBDN501Y (pN)	RBDTriple (pN)
450	550	600
410	600	540
450	550	500
410	460	500
409	550	610
410	460	560
410	600	460
390	455	580
350	400	505
390	510	550
410	440	400
600	455	600
500	490	550
490	455	620
370	470	500
410	530	490
500	650	500
390	440	450
400	410	390
390	505	510
