# Supplementary material for: N501Y mutation of spike protein in SARS-CoV-2 strengthens its binding to receptor ACE2
Source: eLife. 2021 Aug 20;10:e69091. doi: 10.7554/eLife.69091 (PMC8455130; doi:10.7554/eLife.69091)
Supplement: Figure 4—source data 2. [file elife-69091-fig4-data2.xlsx]

## Sheet: Figore 4D-E
Distance of RBD-ACE2 (nm)
RBD		RBDN501Y		RBDTriple
N501-Y41	N501-K353	Y501-Y41	Y501-K353	Y501-Y41	Y501-K353
2	2	2.6	2.6	2.6	2.6
1.6	1.6	2.3	2.1	2.3	2.3
2.1	2.1	2.7	2.7	3.6	3.6
2.7	2.7	3.9	3.9	3.4	3.4
2	2	2.2	2.1	3	3.1
1.9	1.9	3.4	3.7	3.8	4.3
1.6	1.6	2.9	3	2.8	3.1
3.8	3.8	3	3	3.3	3.5
2.2	2.2	4.4	4.1	2.5	2.8
2.2	2.6	2.4	2.4	3	3
2.4	2.4	3.2	3.3	2	2
1.3	1.4	2.4	2.4	4.2	4.2
3	2.9	2.5	2.5	4.5	4.8
1.5	1.5	4.5	4.6	2.6	2.6
1	1.5	2.5	2.5	4.2	4.2
3.1	2.5	1.9	1.9	4.1	4.1
3	3.3	2.4	2.5	3.9	3.9
3	3.2	2.2	2.2	2	2
3.1	3.2	2.6	2.5	2.7	2.7
1.2	1.2	4.3	4.3	4.5	5.1
1.7	1.75	2.6	2.8	4.8	5.1
